# Supplementary material for: Platelet-Rich plasma Injection Management for Ankle osteoarthritis study (PRIMA): protocol of a Dutch multicentre, stratified, block-randomised, double-blind, placebo-controlled trial
Source: PubMed Central journal article supplement (PMC6797250; doi:10.1136/bmjopen-2019-030961), 2019-10-07
Supplement: bmjopen-2019-030961.draft_revisions.pdf [file bmjopen-2019-030961.draft_revisions.pdf]

# BMJ Open

BMJ Open is committed to open peer review. As part of this commitment we make the peer review history of every article we publish publicly available.

When an article is published we post the peer reviewers' comments and the authors' responses online. We also post the versions of the paper that were used during peer review. These are the versions that the peer review comments apply to.

The versions of the paper that follow are the versions that were submitted during the peer review process. They are not the versions of record or the final published versions. They should not be cited or distributed as the published version of this manuscript.

BMJ Open is an open access journal and the full, final, typeset and author-corrected version of record of the manuscript is available on our site with no access controls, subscription charges or pay-per-view fees (<http://bmjopen.bmj.com>).

If you have any questions on BMJ Open's open peer review process please email [info.bmjopen@bmj.com](mailto:info.bmjopen@bmj.com)

# BMJ Open

**Platelet Rich plasma Injection Management for Ankle osteoarthritis study (PRIMA)  
Protocol of a multi-center, stratified, block-randomized, double-blind, placebo-controlled trial**

|                               |                                                                                                                                                                                                                                                                                                                                                                                                                                                                                                                                                                                                                                                                                                                                                                                                                                                                                                                                                                                                                                                |
|-------------------------------|------------------------------------------------------------------------------------------------------------------------------------------------------------------------------------------------------------------------------------------------------------------------------------------------------------------------------------------------------------------------------------------------------------------------------------------------------------------------------------------------------------------------------------------------------------------------------------------------------------------------------------------------------------------------------------------------------------------------------------------------------------------------------------------------------------------------------------------------------------------------------------------------------------------------------------------------------------------------------------------------------------------------------------------------|
| Journal:                      | <i>BMJ Open</i>                                                                                                                                                                                                                                                                                                                                                                                                                                                                                                                                                                                                                                                                                                                                                                                                                                                                                                                                                                                                                                |
| Manuscript ID                 | bmjopen-2019-030961                                                                                                                                                                                                                                                                                                                                                                                                                                                                                                                                                                                                                                                                                                                                                                                                                                                                                                                                                                                                                            |
| Article Type:                 | Protocol                                                                                                                                                                                                                                                                                                                                                                                                                                                                                                                                                                                                                                                                                                                                                                                                                                                                                                                                                                                                                                       |
| Date Submitted by the Author: | 14-Apr-2019                                                                                                                                                                                                                                                                                                                                                                                                                                                                                                                                                                                                                                                                                                                                                                                                                                                                                                                                                                                                                                    |
| Complete List of Authors:     | <p>Paget, Liam; Amsterdam UMC - Locatie AMC, Orthopaedic Surgery<br/>         Bierma-Zeinstra, Sita; Erasmus University Medical Centre, Department of General Practice<br/>         Goedegebuure, S; OLVG, The Sport Physician Group, department of Sports Medicine<br/>         Kerkhoffs, G; Amsterdam UMC - Locatie AMC, Orthopaedic surgery<br/>         Krips, R; Flevoziekenhuis, Orthopaedic Surgery<br/>         Maas, Mario; Amsterdam UMC - Locatie AMC<br/>         Moen, Maarten; The Bergman Clinics, Sports Medicine<br/>         Reurink, G; Amsterdam UMC - Locatie AMC<br/>         Stufkens, S; Amsterdam UMC - Locatie AMC<br/>         de Vos, Robert-Jan; Erasmus University Medical Centre, Department of Orthopaedics and Sports Medicine<br/>         Weir, A; Erasmus University Medical Centre, 5. Department of Orthopaedics and sports medicine; Aspetar Qatar Orthopaedic and Sports Medicine Hospital, Orthopaedics and Sport Medicine<br/>         Tol, J; Amsterdam UMC - Locatie AMC, Orthopaedic Surgery</p> |
| Keywords:                     | Foot & ankle < ORTHOPAEDIC & TRAUMA SURGERY, Adult orthopaedics < ORTHOPAEDIC & TRAUMA SURGERY, SPORTS MEDICINE, ORTHOPAEDIC & TRAUMA SURGERY, Platelet-rich Plasma                                                                                                                                                                                                                                                                                                                                                                                                                                                                                                                                                                                                                                                                                                                                                                                                                                                                            |
|                               |                                                                                                                                                                                                                                                                                                                                                                                                                                                                                                                                                                                                                                                                                                                                                                                                                                                                                                                                                                                                                                                |

SCHOLARONE™  
Manuscripts

# 1 Platelet Rich plasma Injection Management for Ankle osteoarthritis study 2 (PRIMA)

## 3 Protocol of a multi-center, stratified, block-randomized, double-blind, 4 placebo-controlled trial

5 Authors: L.D.A. Paget<sup>1,2,3</sup>, S.M.A. Bierma – Zeinstra<sup>4,5</sup>, S. Goedegebuure<sup>2,6</sup>, G.M.M.J. Kerkhoffs<sup>1,2,3</sup>, R.  
6 Krips<sup>7</sup>, M. Maas<sup>3,8,9</sup>, M. H. Moen<sup>6,10</sup>, G. Reurink<sup>1,2,3,6</sup>, S. A. S. Stufkens<sup>1,2,3</sup>, R.J. de Vos<sup>5</sup>, A. Weir<sup>5,12,13</sup>,  
7 J.L. Tol<sup>1,2,3,6,12</sup>

- 10 1. Department of Orthopaedic Surgery, Amsterdam UMC, University of Amsterdam,  
11 Amsterdam Movement Sciences, Amsterdam, the Netherlands.
- 12 2. Academic Center for Evidence-based Sports medicine (ACES), Amsterdam UMC, Amsterdam,  
13 the Netherlands
- 14 3. Amsterdam Collaboration for Health and Safety in Sports (ACHSS), AMC/VUmc IOC Research  
15 Center, Amsterdam, the Netherlands
- 16 4. Department of General Practice, Erasmus University Medical Center, Rotterdam, The  
17 Netherlands
- 18 5. Department of Orthopaedics and sports medicine, Erasmus University Medical Center,  
19 Rotterdam, The Netherlands
- 20 6. The Sport Physician Group, Department of Sports Medicine, OLVG, Amsterdam, The  
21 Netherlands
- 22 7. Department of Orthopaedic Surgery, Flevoziekenhuis, Almere, The Netherlands
- 23 8. Department of Musculoskeletal Radiology, The Netherlands
- 24 9. Musculoskeletal Imaging Quantification Center (MIQC), The Netherlands.
- 25 10. Department of Sports Medicine , Bergman Clinics , Naarden , the Netherlands
- 26 11. Aspetar, Orthopaedic and Sports Medicine Hospital, Doha, Qatar
- 27 12. Aspetar Sports Groin Pain Centre, Aspetar Orthopaedic and Sports Hospital, Doha, Qatar.
- 28 13. Sport medicine and exercise clinic Haarlem (SBK). Haarlem, The Netherlands.

### 33 Correspondence

34 Liam. D.A. Paget  
35 Department of Orthopaedic Surgery,  
36 Amsterdam UMC  
37 PO Box 22660, 1100 DD Amsterdam  
38 The Netherlands  
39 [L.d.paget@amsterdamumc.nl](mailto:L.d.paget@amsterdamumc.nl)

1  
2  
3 **40 ABSTRACT**

4  
5 **41 Introduction**

6  
7  
8 **42** The onset of ankle osteoarthritis (OA) occurs at a relatively young age in contrast to knee OA and hip  
9  
10 **43** OA, with a reported incidence of 1% to 4% in the general adult population. Systematic reviews  
11  
12 **44** showed that platelet-rich plasma (PRP) injections significantly decrease pain and improve function in  
13  
14 **45** knee OA patients.

15  
16  
17 **46** In case series PRP injections in ankle OA are shown to be safe and improve quality of life over time,  
18  
19 **47** but no randomised controlled trial has been conducted. The objective of the present study is to  
20  
21 **48** evaluate the efficacy of PRP injections for symptom reduction and functional improvement,  
22  
23 **49** compared to placebo, in the treatment of ankle (talocrural) OA.

24  
25  
26 **50 Methods and analysis**

27  
28 **51** We will conduct the Platelet Rich plasma Injection Management for Ankle osteoarthritis (PRIMA)  
29  
30 **52** study: a multicentre, randomised, placebo-controlled trial. One hundred patients suffering from  
31  
32 **53** ankle OA will be randomised into two treatment groups: PRP injection or placebo (saline) injection.  
33  
34 **54** Both groups will receive two injections of PRP or placebo at an interval of 6 weeks.  
35  
36 **55** Primary outcome is the American Orthopaedic Foot and Ankle Society (AOFAS) score at 26 weeks .  
37  
38 **56** Secondary outcomes determined at several follow-up moments up to 5 years, include Ankle  
39  
40 **57** Osteoarthritis Score (AOS), Foot and Ankle Outcome Score (FAOS), pain sub-scale of AOFAS (0-40),  
41  
42 **58** VAS score (VAS 0-100), Ankle activity score (AAS 0-10), Subjective patient satisfaction Short form  
43  
44 **59** Survey-36 (SF-36), Global Attainment Scaling (GAS) and the EQ-5D-3L utility score. A cost-  
45  
46 **60** effectiveness analysis will be performed at 1 year.

47  
48  
49  
50  
51  
52 **62 Ethics and dissemination**

53  
54 **63** The study is approved by the local Medical Ethics Committee (ABR 2018-042, approved 23-7-2018)  
55  
56 **64** and registered in the Dutch trial register (NTR 7261). Results and new knowledge will be  
57  
58  
59  
60

1  
2  
3  
4  
5  
6  
7  
8  
9  
10  
11  
12  
13  
14  
15  
16  
17  
18  
19  
20  
21  
22  
23  
24  
25  
26  
27  
28  
29  
30  
31  
32  
33  
34  
35  
36  
37  
38  
39  
40  
41  
42  
43  
44  
45  
46  
47  
48  
49  
50  
51  
52  
53  
54  
55  
56  
57  
58  
59  
60

65 disseminated through the Dutch Arthritis Association (ReumaNederland), the Dutch patient  
66 federation, conferences and published in a scientific peer-reviewed journal.

67 **Trial registration number**

68 (NTR7261)

69

For peer review only

1  
2  
3 70 **STRENGTH AND LIMITATIONS**  
4

- 5 71 - This is the first study that evaluates the efficacy and cost-effectiveness of ankle (talocrural) OA  
6  
7 72 in a multi-center, stratified, block-randomized, double-blind, placebo-controlled trial design.  
8  
9 73 - A positive outcome of this study will have a significant effect on widespread availability and  
10  
11 74 nationwide implementation of an intra articular injection treatment for ankle OA with PRP.  
12  
13 75 Similarly, a negative outcome (no effect of PRP), will prevent the widespread use of a non-  
14  
15 76 efficacious treatment on patients.  
16  
17  
18 77 - The study population consists only of subjects with isolated ankle OA and no concomitant OA  
19  
20 78 of one or more other major joints of the lower extremities that negatively affects their daily  
21  
22 79 activity level  
23  
24  
25 80 - The outcome concerning the PRP product researched in this randomised controlled trial is  
26  
27 81 prepared using one of the available commercial PRP products. Therefore it has limited  
28  
29 82 generalisability. This is similarly the case for alternative treatment regimens using a different  
30  
31 83 dose or a different number of intra-articular injections.  
32  
33  
34 84 - The composition of PRP will not be analysed. This decision was based on the fact that PRP  
35  
36 85 preparation and composition has frequently been analysed.<sup>9</sup>  
37

38 86  
39  
40  
41  
42  
43  
44  
45  
46  
47  
48  
49  
50  
51  
52  
53  
54  
55  
56  
57  
58  
59  
60

1  
2  
3 **87 BACKGROUND AND RATIONALE**

4 **88** PRP is a potentially efficacious treatment for ankle OA but its use has not been examined in high  
5  
6  
7 **89** quality studies. Ankle OA is more common than hip or knee OA in the young active population.<sup>10</sup> The  
8  
9 **90** incidence of symptomatic ankle OA is estimated at 1% to 4% in the general adult population.<sup>2</sup>  
10  
11 **91** Patients with ankle OA have a quality of life and physical functioning which is comparable with hip  
12  
13 **92** OA and end-stage kidney disease or congestive heart failure.<sup>11</sup> These relatively young (predominantly  
14  
15 **93** female) patients are increased risk for decreased work participation and family care. The available  
16  
17 **94** surgical intervention (arthrodesis) is associated with significant functional limitations. In contrast to  
18  
19 **95** hip and knee OA, where joint replacement is an excellent surgical alternative for severe cases, there  
20  
21 **96** is a clear need for effective non-surgical interventions in ankle OA.  
22  
23

24  
25 **97** Recent systematic reviews on the intra-articular injection therapy in ankle OA found a lack of  
26  
27 **98** evidence from high quality studies to assist in clinical decision-making.<sup>12,13</sup> When compared to  
28  
29 **99** placebo injections, hyaluronic acid or corticosteroid injections, PRP injections might significantly  
30  
31 **100** decrease pain and improve function in knee OA patients.<sup>14-16</sup> Given the clinical effect on pain  
32  
33 **101** reduction in knee OA and a good safety profile, PRP is a promising non-surgical therapy for ankle  
34  
35 **102** OA.<sup>3,4</sup> PRP might delay the irreversible surgical options like arthrodesis. No significant adverse events  
36  
37 **103** have been reported in any PRP trials regarding acute hamstring injuries, achilles tendinopathy, knee  
38  
39 **104** OA or ankle OA.<sup>6,7,15,17-20</sup> Clinical studies on PRP in ankle OA are limited to a single report of 5 cases  
40  
41 **105** and a prospective case series of 20 subjects, which both showed safety and significant reduction of  
42  
43 **106** the VAS-FA score at a mean of 16 months and 12 weeks follow-up.<sup>5,6</sup> Well-designed prospective  
44  
45 **107** Randomised controlled trials (RCT) have not yet been performed.  
46  
47  
48  
49  
50

51 **108**  
52  
53  
54  
55  
56  
57  
58  
59  
60

1  
2  
3 109 **METHODS AND DESIGN**

4  
5 110 **Objectives**

6 111 With the PRIMA study we aim to determine the efficacy of PRP injections in the management of  
7  
8 112 ankle OA by comparing 2 groups, both receiving 2 injections of either: PRP or a placebo solution. We  
9  
10 113 hypothesize that PRP injections are efficacious for symptom reduction and functional improvement  
11  
12 114 compared to placebo in the treatment of ankle (talocrural) OA.  
13  
14  
15

16 115  
17  
18 116 **Study Design**

19 117 The PRIMA study is a multi-center, stratified, block-randomized, double-blind, placebo-controlled  
20  
21 118 trial design will be conducted in order to compare two treatment groups: PRP vs Placebo (saline).  
22  
23 119 After the 26 weeks follow-up of the last patient in the study, the principal investigator and  
24  
25 120 coordinating researcher will be unblinded only after the analysis of the primary outcome. A flow  
26  
27 121 chart of the design and follow-up is shown in figure 1.  
28  
29  
30

31 122  
32  
33 123 **Patient involvement**

34  
35 124 *Active patient involvement through reviewing the proposal (Reviewer level):*

36  
37 125 Active involvement of patients during the design phase is already secured by active involvement of 2  
38  
39 126 patients with ankle OA. Both reviewed the grant proposal.  
40  
41  
42

43 127

44  
45  
46 128 *Execution phase - patients will actively contribute:*

47  
48 129 Active patient involvement will be secured by invitation of at least 2 patients for the annual trial  
49  
50 130 monitoring and evaluation meetings (Informant level).  
51  
52

53  
54 131

55  
56  
57 132 *Analysis phase - Patient will review and interpret the results (reviewer level):*  
58  
59  
60



1  
2  
3 133 Using the blinded codes of the randomisation groups and after breaking the randomisation code,  
4  
5 134 patients (also active in the design phase) will be given the opportunity to interpret the results from a  
6  
7 135 patient perspective.  
8  
9

10 136

11  
12  
13 137 *Dissemination phase - Patient oriented approach (Advisor level):*  
14

15  
16 138 Dissemination activities will comprise a social media strategy with active patient involvement to

17  
18 139 share results with online patient communities and an events attendance strategy enabling patient

19  
20 140 participation in seminars, conferences and workshops.  
21  
22

23 141

24  
25  
26 142 **Fig.1 illustrating the PRIMA multicentre randomized controlled trial design and follow-up procedure**  
27

28 143

29  
30  
31 144 **Study Population**  
32

33 145 **Population (base)**  
34

35  
36 146 Patients with ankle OA in University Medical Centres, teaching hospitals, general hospitals and

37  
38 147 private specialist clinics will be informed about the study. In order to participate, patients must meet

39  
40 148 the eligibility criteria documented below.  
41  
42

43 149

44  
45  
46 150 **Inclusion criteria**  
47

48  
49 151 1. Severity of Ankle OA pain on a visual analogue scale (VAS) (0–100 mm)  $\geq$  40 mm during daily

50  
51 152 activities  
52

53 153 2. X-rays (AP and lateral view) indicating  $\geq$  grade 2 talocrural OA on the Van Dijk classification

54  
55 154 (clarified under section Radiographs)<sup>8</sup>  
56

57  
58 155 3. Age  $\geq$  18 years  
59

60 156

1  
2  
3 157 **Exclusion criteria**  
4

- 5  
6 158 1. Patient has received injection therapy for ankle OA in the previous 6 months  
7  
8 159 2. Patient does not want to receive one of the two therapies  
9  
10 160 3. Patient has clinical signs of concomitant OA of one or more other major joints of the lower  
11  
12 161 extremities that negatively affects their daily activity level  
13  
14  
15 162 4. Previous ankle surgery for OA or Osteochondral defects (OCD) < 1 year (not including surgery  
16  
17 163 for an ankle fracture in the past)  
18  
19  
20

21 165 **Radiographs**  
22

23  
24 166 AP and lateral X-rays of the talocrural joints will be scored according to the Van Dijk classification:<sup>8</sup>  
25

- 26  
27 167 0) Normal joint or subchondral sclerosis  
28  
29 168 1) Osteophytes without joint space narrowing  
30  
31 169 2) Joint space narrowing with or without osteophytes  
32  
33 170 3) (Sub)total disappearance or deformation of the joint space  
34  
35  
36  
37 171

38  
39 172 **Randomisation, Blinding and Treatment Allocation**  
40

41  
42 173 We will include patients at the centre of their first outpatient clinic appointment. For each patient  
43  
44 174 the coordinating researcher will prepare a syringe with PRP and a syringe with placebo (isotonic  
45  
46 175 saline: 0.9% sodium chloride). A Good Clinical Practice (GCP) approved data management system  
47  
48 176 (Castor EDC, based in Amsterdam, the Netherlands) will be used to perform a computer generated  
49  
50 177 block randomisation scheme with patients stratified to centre with a variable block size of 2,4 or 6.  
51  
52 178 This procedure will ensure treatment allocation concealment. The coordinating researcher, treating  
53  
54 179 physician and patient remain blinded to the allocated intervention. An independent researcher from  
55  
56 180 the coordinating location will have access to the randomization result and the allocated intervention.  
57  
58 181 This will be relayed to a GCP-certified research assistant at the centre. The research assistant then  
59  
60

1  
2  
3 182 selects one of the two syringes based on the allocated intervention and blinds the syringe with a  
4  
5 183 covering sheath, ensuring concealment of the content of the syringe. The patients, treating  
6  
7 184 physicians, and coordinating researcher will all be blinded to the allocation of the intervention and to  
8  
9  
10 185 the contents of the syringe. The success of blinding will be assessed by asking participants which  
11  
12 186 injection they think they have received just after the injection procedure, this will then be registered  
13  
14 187 accordingly.

15  
16  
17 188  
18  
19 189 After the 26 weeks follow-up of the last patient in the study, the principal investigator and  
20  
21 190 coordinating researcher will be unblinded only after the analysis of the primary outcome. The  
22  
23 191 patients will remain blinded to the therapy until the 52 weeks follow-up (online questionnaire) of the  
24  
25 192 last patient in the study.

### 193 **Intervention**

194 In this study, patients will be randomised into two treatment groups: PRP injection or placebo saline  
195 injection. For each patient the coordinating researcher will prepare a PRP and a placebo injection  
196 (isotonic saline: 0.9% sodium chloride). The PRP syringe will be prepared according to the  
197 instructions of the manufacturer.<sup>17</sup> Prior to commencement of the study, the coordinating researcher  
198 was trained by a representative of Arthrex, as well as two experienced members of the PRIMA trial  
199 research group (dr. G Reurink en dr. RJ de Vos ) with a vast experience regarding PRP preparation and  
200 injection. The PRP will be prepared using a widely used and commercially available system (Arthrex  
201 double syringe PRP system, Arthrex Medizinische Instrumente GmbH, Garching, Germany).

202 One syringe of 15ml autologous blood will be collected twice from the cubital vein: at inclusion and  
203 at a time interval of 6 weeks. After blood collection the syringe will undergo 5 minutes of  
204 centrifugation and the injection will be given within 30 minutes following venepuncture to prevent  
205 formation of blood clots. No additional substances (calcium, thrombin or citrate) will be added to the  
206 PRP solution. For each procedure, 2 ml of PRP or placebo will be prepared and injected into the  
207 affected ankle joint under ultrasonographic guidance. All subjects will receive a second injection at 6

1  
2  
3 208 weeks, regardless of the effect of the first injection. To guarantee blinding for the allocated  
4  
5 209 treatment of the patient, treatment assessor and treating physician, blood will be drawn and both  
6  
7 210 PRP and placebo will be prepared according to exactly the same procedure for each patient (both at  
8  
9 211 inclusion and at a time interval of 6 weeks after the first injection). However, in the control group,  
10  
11 212 subjects will be injected with 2ml of physiological saline instead of PRP. An unblinded research  
12  
13 213 assistant will blind one of the two identical syringes based on the allocated intervention using a  
14  
15 214 specially manufactured covering sheath in order to conceal randomization. Following the intra-  
16  
17 215 articular injection, the syringe covered by the sheath (containing either the remnants of the PRP or  
18  
19 216 saline), will be directly handed to the unblinded research assistant, who will immediately dispose of  
20  
21 217 the syringe, therefore keeping the treating physician and coordinating researcher blinded. After the  
22  
23 218 intervention, patients are advised to avoid heavy or repetitive stress to the ankle joint for a period of  
24  
25 219 48 hours. Furthermore, patients receive a leaflet containing usual-care healthy life style advice  
26  
27 220 beneficial for ankle OA. This includes losing weight and exercise (avoiding heavy or repetitive ankle  
28  
29 221 loading exercises) such as walking, cycling or swimming.  
30  
31  
32  
33  
34  
35  
36  
37  
38  
39  
40  
41  
42  
43  
44  
45  
46  
47  
48  
49  
50  
51  
52  
53  
54  
55  
56  
57  
58  
59  
60

1  
2  
3 **224 Use of co-intervention**

4  
5 225 Patients are instructed to avoid the use of co-interventions and Non Steroidal Anti-Inflammatory  
6  
7 226 Drugs if possible, 24 hours prior to the intervention and if possible up to a year after the first  
8  
9 227 injection. Throughout the study, key treatment (including usual care: exercise therapy and healthy  
10  
11 228 life style advice) and co-interventions used by participants will be registered, such as Non Steroidal  
12  
13  
14 229 Anti-Inflammatory Drugs (NSAID's), other analgesic drugs, intra-articular injections or inlays.  
15

16  
17 230

18 **231 Study Procedures**

19  
20 232 In the event the subject meets the criteria for inclusion and exclusion, the subject will be informed in  
21  
22 233 more detail about the study procedure. At that time the patient can ask questions about the study  
23  
24 234 and decide whether they will participate and sign the informed consent form. Subsequently the  
25  
26 235 patient will proceed to inclusion and the randomization procedure.  
27  
28

29  
30 236

31 **237 Inclusion**

32  
33 238 Patients are recruited for inclusion by their treating physicians at location. Following inclusion PRP  
34  
35 239 will be prepared according to the PRP system instructions of the manufacturer. During the first two  
36  
37 240 consultations a total of two intra-articular injections will be documented with a time interval of 6  
38  
39 241 weeks. The patient will have no additional costs to usual care as a result of taking part in this study.  
40  
41  
42 242 Physical examination will be performed on three occasions up to 26 weeks from baseline. Patient  
43  
44 243 Reported Outcome Measures (PROMs) will be used to evaluate the treatment effect up to five years.  
45  
46  
47 244 A cost-effectivity analysis will be performed at one year using the PRODISQ questionnaire. The time-  
48  
49 245 frame of the follow-up questionnaires is further illustrated in table 1. Questionnaires will be  
50  
51 246 managed and distributed digitally using a GCP approved data management system (Castor EDC)  
52  
53

54 247

55  
56 248  
57  
58  
59  
60

| Follow-up |                                                                                                                                                                                                  |
|-----------|--------------------------------------------------------------------------------------------------------------------------------------------------------------------------------------------------|
| Baseline  | <ul style="list-style-type: none"> <li>- 1<sup>st</sup> intervention injections</li> <li>- Physical Examination</li> <li>- AOFAS</li> <li>- PROMs</li> <li>- PRODISQ cost-effectivity</li> </ul> |
| 6 weeks   | <ul style="list-style-type: none"> <li>- 2<sup>nd</sup> intervention injection</li> <li>- Physical Examination</li> <li>- AOFAS</li> <li>- PROMs</li> </ul>                                      |
| 12 weeks  | <ul style="list-style-type: none"> <li>- AOFAS</li> <li>- PROMs</li> <li>- PRODISQ cost-effectivity</li> </ul>                                                                                   |
| 26 weeks  | <ul style="list-style-type: none"> <li>- AOFAS</li> <li>- PROMs</li> <li>- PRODISQ cost-effectivity</li> </ul>                                                                                   |
| 39 weeks  | <ul style="list-style-type: none"> <li>- PRODISQ cost-effectivity</li> </ul>                                                                                                                     |
| 52 weeks  | <ul style="list-style-type: none"> <li>- AOFAS</li> <li>- PROMs</li> <li>- PRODISQ cost-effectivity</li> </ul>                                                                                   |
| 5 years   | <ul style="list-style-type: none"> <li>- AOFAS</li> <li>- PROMs</li> </ul>                                                                                                                       |

249 *Table 1. In addition to the American Orthopaedic Foot and Ankle Society (AOFAS) score, the following*  
250 *PROMs will be taken: Foot and Ankle Outcome Score (FAOS), Ankle Osteoarthritis Score (AOS), Visual*  
251 *Analogue Scale (VAS), Ankle activity score (AAS), Subjective patient satisfaction, Short Form Health*  
252 *Survey (SF-36), The Global Attainment Scaling (GAS), EuroQol-5 dimensions-3 levels (EQ-5D-3L). These*  
253 *PROMs will be elaborated on further on. Furthermore the PROductivity and DISease Questionnaire*  
254 *(PRODISQ) will be used to perform a cost-effectivity analysis.*

255

### 256 **Replacement of individual subjects after withdrawal**

257 In the sample size calculation we compensated for an expected loss of 10% of patients to follow-up.

258 No patients will be replaced after withdrawal.

259

### 260 **Safety**

261 All adverse events reported spontaneously by the subject or observed by the investigator or his staff  
262 will be recorded. A variety of conditions have been treated with PRP ranging from muscle and tendon

263 injuries to intra-articular injections of the knee and ankle. No serious adverse events have been  
264 documented to date concerning PRP intra-articular injections of the ankle.

## 265 **Outcome Measures**

### 266 **Main study parameter/endpoint**

267 The primary objective of this study will be to quantify pain or function improvement using the  
268 American Orthopaedic Foot and Ankle Society (AOFAS) score at 26 weeks follow-up. Studies  
269 evaluating the efficacy of PRP in knee OA maintained a follow-up between 3 and 12 months. We  
270 have therefore opted to take 26 weeks as our primary outcome measure, fitting within the  
271 aforementioned range.<sup>3</sup> The AOFAS is a validated scale for ankle OA (0-100) measuring three  
272 subdomains (pain, function and alignment) which together total nine items.<sup>21-24</sup> Subdomain pain is  
273 measured by one item where a maximal score of 40 indicates no pain. Function consists of 7 items  
274 where full function is indicated by the maximal score of 50 points. Similar to the pain subdomain,  
275 alignment has a potential maximum score of 10 points using one item, indicating good alignment.<sup>21,22</sup>  
276 The AOFAS questionnaire, having undergone forward and backward translation to Dutch by de Boer  
277 et al. 2017, has an excellent internal consistency (Cronbach's  $\alpha$  0.947) and an excellent test-retest  
278 reliability (ICC 0.93).<sup>21</sup>

### 279 **Secondary study parameters/endpoints**

280 Secondary outcome measures are a number of other Patient Reported Outcome Measures (PROMs).

281 These will be taken at baseline, 6, 12, 26 and 52 weeks as well as 5 years

- 282 1. Ankle Osteoarthritis Score (AOS) is a visual analog scale from 0 – 100 mm for 18 questions,  
283 with 9 relating to pain and 9 relating to disability.
- 284 2. Foot and Ankle Outcome Score (FAOS). Each question gets assigned 0 – 4 points based on the  
285 answer given. The scale runs from 0 (extreme symptoms) to 100 points (no symptoms).
- 286 3. In order to evaluate pain, the pain sub-scale of AOFAS (0-40 points) will be analysed. On this  
287 scale the lower the score the more pain the patient has. Additionally a VAS score (VAS 0-100

- 1  
2  
3 288 mm) is measured during activities of daily living, with 0 mm being no pain and 100 mm the  
4  
5 289 worst pain imaginable.  
6  
7  
8 290 4. The total AOFAS score at the other time points than the primary one  
9  
10 291 5. Ankle activity score (0-10 points) is scored according to chart based on the performable  
11  
12 292 activity level  
13  
14 293 6. Subjective patient satisfaction (4 categories) Poor, Fair, Good, Excellent  
15  
16 294 7. Short Form Health Survey SF-36 is a health-related quality of life score (0-100 points). The  
17  
18 295 higher the patient scores, the higher the disability.  
19  
20  
21 296 8. The Global Attainment Scaling (GAS) is a method of scoring based on achievement related to  
22  
23 297 pre-determined goals in agreement with the patient. Points are subtracted for not achieving  
24  
25 298 the pre-defined goals or vice versa. Scores range from 100 (high functioning) to 0 (severely  
26  
27 299 impaired)  
28  
29  
30 300 9. EuroQol-5 dimensions-3 levels (EQ-5D-3L) utility score allows a patient's health to be defined  
31  
32 301 by a 5-digit number.  
33  
34 302 10. PROductivity and DISease Questionnaire (PRODISQ) will be used to determine indirect costs  
35  
36 303 and direct costs cost effectivity. The PRODISQ questionnaire is taken at baseline and every 3  
37  
38 304 months thereafter up until 1 year. This will be done in conjunction with the EQ-5D-3L.  
39  
40  
41 305

#### 43 306 **Loss to follow-up**

45 307 The coordinating researcher will attempt to limit loss to follow-up as much as possible by contacting  
46  
47 308 every subject and being present at every subject visit. All digital questionnaires will be constantly  
48  
49 309 monitored to ensure they are being filled in and otherwise followed-up by the coordinating  
50  
51 310 researcher. In the event of subject withdrawal, an analysis of demographic and prognostic  
52  
53 311 characteristics will be done on these cases and the remaining patients. As previously described by  
54  
55 312 Järvinen et al. 2014, we will document the participant eligible for and compliant with each follow-  
56  
57 313 up.<sup>25</sup>  
58  
59  
60



1  
2  
3  
4  
5  
6  
7  
8  
9  
10  
11  
12  
13  
14  
15  
16  
17  
18  
19  
20  
21  
22  
23  
24  
25  
26  
27  
28  
29  
30  
31  
32  
33  
34  
35  
36  
37  
38  
39  
40  
41  
42  
43  
44  
45  
46  
47  
48  
49  
50  
51  
52  
53  
54  
55  
56  
57  
58  
59  
60

314

315

For peer review only

1  
2  
3 316 **Missing items**  
4

5 317 Missing items of a score will be handled according to the instructions of the specific scales. In the  
6  
7 318 event of no instructions, we will calculate the percentage of missing items on a scale. Due to the  
8  
9 319 potential impact on trial conclusions, multiple imputation (if more than 10% missing items on a scale)  
10  
11  
12 320 will be applied.  
13

14 321  
15 322 **Sample Size**

16 323 Based on previous and ongoing studies, the study protocol of the randomised controlled trial is  
17  
18 324 designed to detect a difference of 12 points (0-100) on the AOFAS score. There is no official  
19  
20 325 agreement on the minimal clinical important difference for the AOFAS score regarding ankle OA.  
21  
22 326 However in reliable musculoskeletal literature, 10% – 15% of the used scale was reported.<sup>18,26,27</sup>  
23  
24 327 Our pre-defined minimal clinical important difference of 12 % is located within this range.<sup>18,26,27</sup>  
25  
26 328 Based on a previous placebo controlled RCT on injection therapy (hyaluronic acid) in ankle OA of De  
27  
28 329 Groot et al. a standard deviation of 16.3 can be expected.<sup>13</sup> Taking into account a two-sided level of  
29  
30 330 significance of 5%, a power of 90% and a dropout rate of 10%, approximately 50 (45 plus 10% drop  
31  
32 331 out) patients per group will be needed (N=100).  
33  
34  
35

36  
37 332 **Data Management**  
38

39  
40 333 After giving permission for participating in this study, participants will receive a link to fill in digital  
41  
42 334 surveys. All data gained outside Castor EDC will be stored on the AMC secured hard drive. All data  
43  
44 335 will be coded and stored in the Castor EDC online database which meets the AMC safety criteria and  
45  
46 336 good clinical practice guidelines. The primary investigator and project leader will safeguard the coded  
47  
48 337 data through password secured access. All participant's data will be archived for at least 15 years and  
49  
50 338 handled with in accordance with the Dutch Personal Data Protection Act (Wbp). Data protection is  
51  
52 339 provided through the safety protocol of Castor EDC with automated backups and SSL security.  
53  
54  
55

56 340 **Statistical analysis**  
57

58 341 A standard operating procedure will be available to logically recode and clean the data. The data will  
59  
60 342 be interpreted according to a blinded data interpretation scheme described by Järvinen et al, 2014.<sup>25</sup>

1  
2  
3 343 The authors will interpret the statistical results until a consensus is reached. Once the authors are in  
4  
5 344 agreement the two groups will be unblinded and no changes will be applied to the interpretation of  
6  
7 345 the results.  
8  
9

#### 10 346 **Baseline characteristics**

11  
12  
13 347 Baseline characteristics will be analyzed between groups using descriptive statistics.  
14  
15

#### 16 348 **Primary outcome measure**

17  
18 349 Analysis will be performed using an intention to treat approach. To test for the effect of treatment  
19  
20 350 on the between-group difference in primary outcome, we will use the repeated measurement  
21  
22 351 general linear model. Changes from baseline to all follow-up time points will be included in the  
23  
24 352 model. Adjustments will be made for those baseline variables that influenced the primary outcome  
25  
26 353 with  $p < 0.10$ .  
27  
28  
29

30 354

#### 31 32 33 355 **Secondary outcome measures**

34  
35 356 To test for the effect of treatment on the between-group difference in the secondary outcomes, we  
36  
37 357 will use the repeated measurement general linear model. Changes from baseline to all follow-up  
38  
39 358 time points will be included in the model.  
40  
41  
42

#### 43 359 **Economic analysis**

44  
45 360 In the event of a positive significant outcome, an economic analysis is needed to support a possible  
46  
47 361 change of practice. An economic analysis (costs) will be performed in order to determine cost-  
48  
49 362 effectiveness.  
50  
51

52  
53 363 We will assess the differences in mean quality-adjusted life years (QALYs), costs, and net benefits  
54  
55 364 between the PRP injection group and the placebo group using linear models. We express the cost-  
56  
57 365 effectiveness by using cost-effectiveness acceptability curves from both a healthcare perspective and  
58  
59 366 a societal perspective. With multiple bootstrap replicates of the average difference in costs and  
60

1  
2  
3 367 effects in the incremental cost-effectiveness plane we will express the uncertainty of our cost-  
4  
5 368 effectiveness analysis.  
6  
7

8 369 The cost-effectivity analysis will be performed with a 1-year time horizon. We use the three-level  
9  
10 370 EQ-5D questionnaire (Euroqol, Rotterdam, the Netherlands) to calculate QALYs as the area under the  
11  
12 371 curve of the utility scores measured over 12 months, according to the Dutch tariff. The analysis will  
13  
14 372 be based on indirect costs and direct costs and will be determined using the PRODISQ questionnaire.  
15  
16 373 The PRODISQ questionnaire is taken at baseline and every 3 months thereafter up until 1 year.  
17  
18  
19

20 374

21  
22 375 **Monitoring committee**  
23

24  
25 376 The PRIMA trial will be monitored by the clinical research unit (CRU) of the coordination study  
26  
27 377 centre. The CRU aims to improve the quality of clinical research and ultimately, patient care. Before  
28  
29 378 the PRIMA trial commenced, a monitoring plan was set-up. This Monitoring plan facilitates  
30  
31 379 compliance with the Human Research Act (WMO), Good Clinical Practice (ICH-GCP) guidelines  
32  
33 380 (5.18.1) and/ or ISO14155, which require monitors to verify that (a) the rights and well-being of  
34  
35 381 human subjects are protected,  
36  
37 382 (b) recorded study data is accurate, complete, and verifiable with the source documents,  
38  
39 383 (c) the conduct of the study is compliant with the currently approved protocol and with applicable  
40  
41 384 laws regulatory requirements, e.g. WMO, ICH-GCP, ISO14155.  
42  
43  
44  
45

46  
47 385 Throughout the study, monitoring will be performed at initiation of the trial, at each participating  
48  
49 386 centre once approximately 3 subjects have been enrolled, after approximately 10 – 15 enrolled  
50  
51 387 subjects have completed the 26 week follow-up, after 70 subjects have been enrolled and after  
52  
53 388 database lock.  
54  
55

56 389

57  
58  
59 390  
60

### 391 **Ethics and Dissemination**

392 The study is approved by the local Medical Ethics Committee (ABR 2018-042, approved 23-7-2018)  
393 and is registered in the Dutch trial register (NTR 7261). The results of this project study and new  
394 knowledge will be disseminated through the Dutch Arthritis Association (ReumaNederland),  
395 presentations, news publications, blogs, websites social media and professional organisations  
396 (rheumatology, orthopaedics, primary care medicine, sports medicine, public health) and the Dutch  
397 patient federation (Patiëntenfederatie Nederland). The participants will also be informed about the  
398 results of the study. The study will be conducted according to the principles of the Declaration of  
399 Helsinki, GCP and the Medical Research Involving Human Subjects Act (WMO). The board of each  
400 participating hospital reviewed and approved the local feasibility. Monitoring and auditing will be  
401 carried out throughout the study. In the event of Serious Adverse Events, these will be documented  
402 and reported to the monitor and the Medical Ethics board. Eligible patients will be informed of the  
403 study and will sign an informed consent form before participating.

404

### 405 **Discussion**

406 This is the first study that evaluates the efficacy and cost-effectiveness of Platelet-rich Plasma  
407 injections in the treatment of ankle OA in a multi-center, stratified, block-randomized, double-blind,  
408 placebo-controlled trial design. The primary outcome is the AOFAS score at 26 weeks. This study will  
409 also evaluate the long term efficacy of PRP for up to five years.

410

411 Platelet-rich Plasma has been shown to alleviate symptoms of patients suffering from knee OA.<sup>4</sup> In  
412 the absence of effective evidence-based non-surgical interventions for ankle OA, PRP would fulfil a  
413 clear clinical need. This will be the first randomized controlled trial to evaluate the efficacy of PRP in  
414 ankle OA. Previous trials concerned with the efficacy of PRP for multiple indications are usually of low

1  
2  
3 415 quality and adhere to a follow-up of 26 weeks or shorter. Furthermore a cost-effectiveness analysis  
4  
5 416 has never been performed in previous trials on PRP in the treatment of OA.  
6  
7

8 417 A positive study outcome would have a significant impact leading to change in clinical practice, where  
9  
10 418 PRP could be offered as a non-surgical intervention, in the management of ankle OA, if available. A  
11  
12 419 negative outcome, will prevent the widespread use of a non-efficacious treatment on patients.  
13  
14

15 420 This study has potential limitations. First of all, due to financial constraints, (semi-quantitative) MRI-  
16  
17 421 defined cartilage degenerative changes could not be used as a secondary outcome score.  
18

19  
20 422 Furthermore, the composition of PRP was not analysed. This decision was based on the fact that PRP  
21  
22 423 preparation and composition has frequently been analysed.<sup>9</sup> Lastly, the outcome concerning the PRP  
23  
24 424 product researched in this randomised controlled trial is prepared using a Hettich Rotofix32 A  
25  
26 425 centrifuge and Arthrex syringes. Therefore it has limited generalisability compared to other PRP  
27  
28 426 products. This is similarly the case for alternative treatment regimens using a different dose or a  
29  
30 427 different number of intra-articular injections.  
31  
32

33  
34 428

### 35 36 429 **Conclusion**

37  
38  
39 430 This will be the first randomized controlled trial to assess both the efficacy and cost-effectiveness of  
40  
41 431 PRP in ankle OA.  
42

43  
44 432

### 45 46 47 433 **Contributor ship statement**

48  
49 434 All authors have been actively involved in creating and writing the study protocol, and all authors  
50  
51 435 critically commented on the paper and gave their final approval of the version that we submitted.  
52  
53

54  
55 436

### 56 57 437 **Competing interests**

58  
59  
60

1  
2  
3 438 All authors have completed the ICMJE uniform disclosure form at [www.icmje.org/coi\\_disclosure.pdf](http://www.icmje.org/coi_disclosure.pdf)  
4  
5 439 and declare: no support from any organisation for the submitted work; no financial relationships with  
6  
7 440 any organisations that might have an interest in the submitted work in the previous three years; no  
8  
9 441 other relationships or activities that could appear to have influenced the submitted work.  
10  
11  
12

13 442

14  
15 443 **Funding**

16  
17  
18 444 This multicenter Randomized Controlled Trial was supported by a grant from the Dutch Arthritis  
19  
20 445 Foundation (ReumaNederland)  
21  
22

23 446

24  
25  
26  
27 447 **Figure legends/captions**

28  
29 448 Fig.1 illustrating the PRIMA multicentre randomized controlled trial design and follow-up procedure  
30  
31

32 449  
33  
34  
35  
36  
37  
38  
39  
40  
41  
42  
43  
44  
45  
46  
47  
48  
49  
50  
51  
52  
53  
54  
55  
56  
57  
58  
59  
60

450 **References**

- 451 1. Saltzman CL, Salamon ML, Blanchard GM, et al. Epidemiology of ankle arthritis: report of a  
452 consecutive series of 639 patients from a tertiary orthopaedic center. *Iowa Orthop J*. 2005.
- 453 2. Cushnaghan J, Dieppe P. Study of 500 patients with limb joint osteoarthritis. I. Analysis by  
454 age, sex, and distribution of symptomatic joint sites. *Ann Rheum Dis*. 1991;50(1):8-13.  
455 doi:10.1136/ard.50.1.8
- 456 3. Xing D, Wang B, Zhang W, et al. Intra-articular platelet-rich plasma injections for knee  
457 osteoarthritis: An overview of systematic reviews and risk of bias considerations. *Int J*  
458 *Rheum Dis*. 2017;20(11):1612-1630. doi:10.1111/1756-185X.13233
- 459 4. Dai WL, Zhou AG, Zhang H, Zhang J. Efficacy of Platelet-Rich Plasma in the Treatment of  
460 Knee Osteoarthritis: A Meta-analysis of Randomized Controlled Trials. *Arthrosc - J*  
461 *Arthrosc Relat Surg*. 2017. doi:10.1016/j.arthro.2016.09.024
- 462 5. Angthong C, Khadsongkram A, Angthong W. Outcomes and quality of life after platelet-  
463 rich plasma therapy in patients with recalcitrant hindfoot and ankle diseases: A  
464 preliminary report of 12 patients. *J Foot Ankle Surg*. 2013;52(4):475-480.  
465 doi:10.1053/j.jfas.2013.04.005
- 466 6. Fukawa T, Yamaguchi S, Akatsu Y, Yamamoto Y, Akagi R, Sasho T. Safety and Efficacy of  
467 Intra-articular Injection of Platelet-Rich Plasma in Patients With Ankle Osteoarthritis.  
468 *Foot Ankle Int*. 2017;38(6):596-604. doi:10.1177/1071100717700377
- 469 7. Repetto I, Biti B, Cerruti P, Trentini R, Felli L. Conservative Treatment of Ankle  
470 Osteoarthritis: Can Platelet-Rich Plasma Effectively Postpone Surgery? *J Foot Ankle Surg*.  
471 2017;56(2):362-365. doi:10.1053/j.jfas.2016.11.015
- 472 8. van Dijk CN, Verhagen R a, Tol JL. Arthroscopy for problems after ankle fracture. *J Bone Jt*  
473 *Surg*. 1997;79-B(2):280-284. doi:10.1302/0301-620X.79B2.7153
- 474 9. Oudelaar BW, Peerbooms JC, Huis in 't Veld R, Vochteloo AJH. Concentrations of Blood  
475 Components in Commercial Platelet-Rich Plasma Separation Systems: A Review of the  
476 Literature. *Am J Sports Med*. 2018. doi:10.1177/0363546517746112
- 477 10. Murray C, Marshall M, Rathod T, Bowen CJ, Menz HB, Roddy E. Population prevalence and  
478 distribution of ankle pain and symptomatic radiographic ankle osteoarthritis in  
479 community dwelling older adults: A systematic review and cross-sectional study. *PLoS*  
480 *One*. 2018. doi:10.1371/journal.pone.0193662
- 481 11. Saltzman CL. Impact of Comorbidities on the Measurement of Health in Patients with  
482 Ankle Osteoarthritis. *J Bone Jt Surg*. 2006;88(11):2366. doi:10.2106/JBJS.F.00295
- 483 12. Vannabouathong C, Del Fabbro G, Sales B, et al. Intra-articular Injections in the Treatment  
484 of Symptoms from Ankle Arthritis: A Systematic Review. *Foot Ankle Int*.



- 1  
2  
3 485 2018:107110071877937. doi:10.1177/1071100718779375  
4  
5  
6 486 13. DeGroot H, Uzunishvili S, Weir R, Al-omari A, Gomes B. Intra-articular injection of  
7 487 hyaluronic acid is not superior to saline solution injection for ankle arthritis: a  
8 488 randomized, double-blind, placebo-controlled study. *J Bone Joint Surg Am.* 2012;94(1):2-  
9 489 8. doi:10.2106/JBJS.J.01763  
10  
11  
12 490 14. Meheux CJ, McCulloch PC, Lintner DM, Varner KE, Harris JD. Efficacy of Intra-articular  
13 491 Platelet-Rich Plasma Injections in Knee Osteoarthritis: A Systematic Review. *Arthrosc - J*  
14 492 *Arthrosc Relat Surg.* 2016;32(3):495-505. doi:10.1016/j.arthro.2015.08.005  
15  
16  
17 493 15. Laudy ABM, Bakker EWP, Rekers M, Moen MH. Efficacy of platelet-rich plasma injections  
18 494 in osteoarthritis of the knee: a systematic review and meta-analysis. *Br J Sports Med.*  
19 495 2015;49(10):657-672. doi:10.1136/bjsports-2014-094036  
20  
21  
22 496 16. Moen M, Weir A, Bakker E, Rekers M, Laudy G. Efficacy of platelet-rich plasma injections  
23 497 in osteoarthritis of the knee: an updated systematic review and meta-analysis. *Osteoarthr*  
24 498 *Cartil.* 2016;24:S520-S521. doi:10.1016/j.joca.2016.01.953  
25  
26  
27 499 17. Reurink G, Goudswaard GJ, Moen MH, et al. Platelet-Rich Plasma Injections in Acute  
28 500 Muscle Injury. *N Engl J Med.* 2014;370(26):2546-2547. doi:10.1056/NEJMc1402340  
29  
30  
31 501 18. de Vos RJ, Weir A, van Schie HTM, et al. Platelet-rich plasma injection for chronic Achilles  
32 502 tendinopathy: a randomized controlled trial. *JAMA.* 2010;303(2):144-149.  
33 503 doi:10.1001/jama.2009.1986  
34  
35  
36 504 19. Pas HI, Reurink G, Tol JL, Weir A, Winters M, Moen MH. Efficacy of rehabilitation  
37 505 (lengthening) exercises, platelet-rich plasma injections, and other conservative  
38 506 interventions in acute hamstring injuries: an updated systematic review and meta-  
39 507 analysis. *Br J Sports Med.* 2015;49(18):1197-1205. doi:10.1136/bjsports-2015-094879  
40  
41  
42 508 20. Hamilton B, Tol JL, Almusa E, et al. Platelet-rich plasma does not enhance return to play in  
43 509 hamstring injuries: a randomised controlled trial. *Br J Sports Med.* 2015;49(14):943-950.  
44 510 doi:10.1136/bjsports-2015-094603  
45  
46  
47 511 21. De Boer AS, Tjioe RJC, Van Der Sijde F, et al. The American Orthopaedic Foot and Ankle  
48 512 Society Ankle-Hindfoot Scale; Translation and validation of the Dutch language version  
49 513 for ankle fractures. *BMJ Open.* 2017;7(8):1-12. doi:10.1136/bmjopen-2017-017040  
50  
51  
52 514 22. Kitaoka HB, Alexander IJ, Adelaar RS, Nunley JA, Myerson MS, Sanders M. Clinical rating  
53 515 systems for the ankle-hindfoot, midfoot, hallux, and lesser toes. *Foot ankle Int.*  
54 516 1994;15(7):349-353. doi:10.1177/107110079401500701  
55  
56  
57 517 23. Sayyed-Hosseini S-H, Hassankhani GG, Bagheri F, Alavi N, Shojaie B, Mousavian A.  
58 518 Validation of the Persian Version of the American Orthopedic Foot and Ankle Society  
59 519 Score (AOFAS) Questionnaire. *Arch bone Jt Surg.* 2018;6(3):233-239.  
60 520 doi:10.1097/PHM.0000000000000234

- 1  
2  
3 521 24. Vosoughi AR, Roustaei N, Mahdaviazad H. American Orthopaedic Foot and Ankle Society  
4 522 ankle-hindfoot scale: A cross-cultural adaptation and validation study from Iran. *Foot*  
5 523 *Ankle Surg.* 2018. doi:10.1016/j.fas.2017.02.007  
6  
7  
8 524 25. Järvinen TLN, Sihvonen R, Bhandari M, et al. Blinded interpretation of study results can  
9 525 feasibly and effectively diminish interpretation bias. *J Clin Epidemiol.* 2014;67(7):769-  
10 526 772. doi:10.1016/j.jclinepi.2013.11.011  
11  
12  
13 527 26. Pham T, van der Heijde D, Altman RD, et al. OMERACT-OARSI initiative: Osteoarthritis  
14 528 research society international set of responder criteria for osteoarthritis clinical trials  
15 529 revisited. *Osteoarthr Cartil.* 2004. doi:10.1016/j.joca.2004.02.001  
16  
17  
18 530 27. Rozendaal RM, Koes BW, Van Osch GJVM, et al. Effect of glucosamine sulfate on hip  
19 531 osteoarthritis: A randomized trial. *Ann Intern Med.* 2008. doi:10.7326/0003-4819-148-4-  
20 532 200802190-00005  
21  
22

23 533  
24  
25  
26  
27  
28  
29  
30  
31  
32  
33  
34  
35  
36  
37  
38  
39  
40  
41  
42  
43  
44  
45  
46  
47  
48  
49  
50  
51  
52  
53  
54  
55  
56  
57  
58  
59  
60

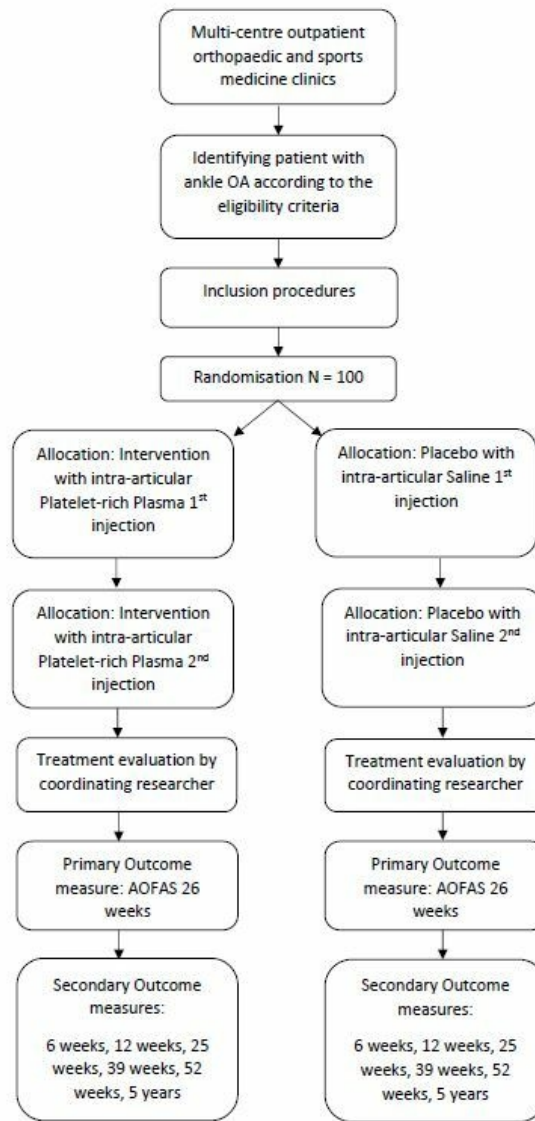

45 Fig.1 illustrating the PRIMA multicentre randomized controlled trial design and follow-up procedure

46 39x67mm (300 x 300 DPI)

# BMJ Open

**Platelet Rich plasma Injection Management for Ankle osteoarthritis study (PRIMA)  
Protocol of a Dutch multi-center, stratified, block-randomized, double-blind, placebo-controlled trial**

|                                 |                                                                                                                                                                                                                                                                                                                                                                                                                                                                                                                                                                                                                                                                                                                                                                                                                                                                                                                                                                                                                                                                                                                                                                                                                                                                                                                                                                                                                                                                                                                                                                                                                                       |
|---------------------------------|---------------------------------------------------------------------------------------------------------------------------------------------------------------------------------------------------------------------------------------------------------------------------------------------------------------------------------------------------------------------------------------------------------------------------------------------------------------------------------------------------------------------------------------------------------------------------------------------------------------------------------------------------------------------------------------------------------------------------------------------------------------------------------------------------------------------------------------------------------------------------------------------------------------------------------------------------------------------------------------------------------------------------------------------------------------------------------------------------------------------------------------------------------------------------------------------------------------------------------------------------------------------------------------------------------------------------------------------------------------------------------------------------------------------------------------------------------------------------------------------------------------------------------------------------------------------------------------------------------------------------------------|
| Journal:                        | <i>BMJ Open</i>                                                                                                                                                                                                                                                                                                                                                                                                                                                                                                                                                                                                                                                                                                                                                                                                                                                                                                                                                                                                                                                                                                                                                                                                                                                                                                                                                                                                                                                                                                                                                                                                                       |
| Manuscript ID                   | bmjopen-2019-030961.R1                                                                                                                                                                                                                                                                                                                                                                                                                                                                                                                                                                                                                                                                                                                                                                                                                                                                                                                                                                                                                                                                                                                                                                                                                                                                                                                                                                                                                                                                                                                                                                                                                |
| Article Type:                   | Protocol                                                                                                                                                                                                                                                                                                                                                                                                                                                                                                                                                                                                                                                                                                                                                                                                                                                                                                                                                                                                                                                                                                                                                                                                                                                                                                                                                                                                                                                                                                                                                                                                                              |
| Date Submitted by the Author:   | 16-Sep-2019                                                                                                                                                                                                                                                                                                                                                                                                                                                                                                                                                                                                                                                                                                                                                                                                                                                                                                                                                                                                                                                                                                                                                                                                                                                                                                                                                                                                                                                                                                                                                                                                                           |
| Complete List of Authors:       | <p>Paget, Liam; Amsterdam UMC - Locatie AMC, Orthopaedic Surgery; Amsterdam Collaboration for Health and Safety in Sports (ACHSS), AMC/VUmc IOC Research Center</p> <p>Bierma-Zeinstra, Sita; Erasmus University Medical Centre, Department of General Practice; Erasmus Medical Center, Orthopaedic Surgery</p> <p>Goedegebuure, S; OLVG, the Sport Physician Group, Sports Medicine; Academic Center for Evidence-based Sports medicine (ACES), Amsterdam UMC</p> <p>Kerkhoffs, Gino; Amsterdam UMC - Locatie AMC, Orthopaedic Surgery; Amsterdam Collaboration for Health and Safety in Sports (ACHSS), AMC/VUmc IOC Research Center</p> <p>Krips, R; Flevoziekenhuis, Orthopaedic Surgery</p> <p>Maas, Mario; Amsterdam UMC - Locatie AMC, Radiology; Academic Center for Evidence-based Sports medicine (ACES), Amsterdam UMC</p> <p>Moen, Maarten; Bergman Clinics, Sports Medicine; OLVG, the Sport Physician Group</p> <p>Reurink, G; Academic Center for Evidence-based Sports medicine (ACES), Amsterdam UMC; OLVG, the Sport Physician Group, Sports Medicine</p> <p>Stufkens, Sjoerd; Amsterdam UMC - Locatie AMC, Orthopaedic Surgery; Amsterdam Collaboration for Health and Safety in Sports (ACHSS), AMC/VUmc IOC Research Center</p> <p>de Vos, Robert-Jan; Erasmus University Medical Centre, Orthopaedics and Sports Medicine</p> <p>Weir, A; Erasmus University Medical Centre, Orthopaedics and sports medicine; Sports medicine and exercise clinic Haarlem (SBK)</p> <p>Tol, J; Academic Center for Evidence-based Sports medicine (ACES), Amsterdam UMC; Aspetar Orthopaedic and Sports Medicine Hospital</p> |
| <b>Primary Subject Heading</b>: | Sports and exercise medicine                                                                                                                                                                                                                                                                                                                                                                                                                                                                                                                                                                                                                                                                                                                                                                                                                                                                                                                                                                                                                                                                                                                                                                                                                                                                                                                                                                                                                                                                                                                                                                                                          |
| Secondary Subject Heading:      | Surgery, Sports and exercise medicine                                                                                                                                                                                                                                                                                                                                                                                                                                                                                                                                                                                                                                                                                                                                                                                                                                                                                                                                                                                                                                                                                                                                                                                                                                                                                                                                                                                                                                                                                                                                                                                                 |
| Keywords:                       | Foot & ankle < ORTHOPAEDIC & TRAUMA SURGERY, SPORTS MEDICINE, ORTHOPAEDIC & TRAUMA SURGERY, Platelet-rich Plasma, Osteoarthritis, Ankle Osteoarthritis                                                                                                                                                                                                                                                                                                                                                                                                                                                                                                                                                                                                                                                                                                                                                                                                                                                                                                                                                                                                                                                                                                                                                                                                                                                                                                                                                                                                                                                                                |

1  
2  
3  
4  
5  
6  
7  
8  
9  
10  
11  
12  
13  
14  
15  
16  
17  
18  
19  
20  
21  
22  
23  
24  
25  
26  
27  
28  
29  
30  
31  
32  
33  
34  
35  
36  
37  
38  
39  
40  
41  
42  
43  
44  
45  
46  
47  
48  
49  
50  
51  
52  
53  
54  
55  
56  
57  
58  
59  
60

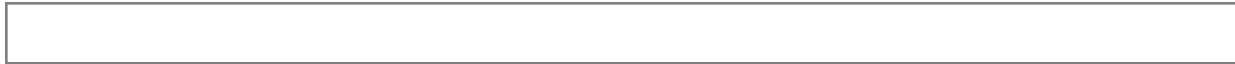

SCHOLARONE™  
Manuscripts

# 1 Platelet Rich plasma Injection Management for Ankle osteoarthritis study 2 (PRIMA)

## 3 Protocol of a Dutch multi-center, stratified, block-randomized, double-blind, 4 placebo-controlled trial

5 Authors: L.D.A. Paget<sup>1,2,3</sup>, S.M.A. Bierma – Zeinstra<sup>4,5</sup>, S. Goedegebuure<sup>2,6</sup>, G.M.M.J. Kerkhoffs<sup>1,2,3</sup>, R.  
6 Krips<sup>7</sup>, M. Maas<sup>3,8,9</sup>, M. H. Moen<sup>6,10</sup>, G. Reurink<sup>1,2,3,6</sup>, S. A. S. Stufkens<sup>1,2,3</sup>, R.J. de Vos<sup>5</sup>, A. Weir<sup>5,12,13</sup>,  
7 J.L. Tol<sup>1,2,3,6,11</sup>

- 10 1. Department of Orthopaedic Surgery, Amsterdam UMC, University of Amsterdam,  
11 Amsterdam Movement Sciences, Amsterdam, the Netherlands.
- 12 2. Academic Center for Evidence-based Sports medicine (ACES), Amsterdam UMC, Amsterdam,  
13 the Netherlands
- 14 3. Amsterdam Collaboration for Health and Safety in Sports (ACHSS), AMC/VUmc IOC Research  
15 Center, Amsterdam, the Netherlands
- 16 4. Department of General Practice, Erasmus University Medical Center, Rotterdam, The  
17 Netherlands
- 18 5. Department of Orthopaedics and Sports Medicine, Erasmus University Medical Center,  
19 Rotterdam, The Netherlands
- 20 6. The Sport Physician Group, Department of Sports Medicine, OLVG, Amsterdam, The  
21 Netherlands
- 22 7. Department of Orthopaedic Surgery, Flevoziekenhuis, Almere, The Netherlands
- 23 8. Department of Musculoskeletal Radiology, The Netherlands
- 24 9. Musculoskeletal Imaging Quantification Center (MIQC), The Netherlands.
- 25 10. Department of Sports Medicine, Bergman Clinics, Naarden, the Netherlands
- 26 11. Aspetar, Orthopaedic and Sports Medicine Hospital, Doha, Qatar
- 27 12. Aspetar Sports Groin Pain Centre, Orthopaedic and Sports Medicine Hospital, Doha, Qatar
- 28 13. Sport medicine and exercise clinic Haarlem (SBK). Haarlem, The Netherlands.

### 33 Correspondence

34 Liam. D.A. Paget

35 Department of Orthopaedic Surgery,

36 Amsterdam UMC

37 PO Box 22660, 1100 DD Amsterdam

38 The Netherlands

39 [L.d.paget@amsterdamumc.nl](mailto:L.d.paget@amsterdamumc.nl)

## 40 **ABSTRACT**

### 41 **Introduction**

42 PRP is a potentially efficacious treatment for ankle OA but its use has not been examined in high  
43 quality studies. Systematic reviews show that platelet-rich plasma (PRP) injections significantly  
44 decrease pain and improve function in knee OA patients. Ankle OA is more common than hip or knee  
45 OA in the young active population; with a prevalence of 3.4%.

46 PRP injections in ankle OA are shown to be safe and improve quality of life over time, but no  
47 randomised controlled trial has been conducted. Our randomised controlled trial will evaluate the  
48 efficacy of PRP injections for symptom reduction and functional improvement, compared to placebo,  
49 in the treatment of ankle (talocrural) OA.

### 50 **Methods and analysis**

51 We will conduct the Platelet Rich plasma Injection Management for Ankle osteoarthritis (PRIMA)  
52 study: a multicentre, randomised, placebo-controlled trial. One hundred patients suffering from  
53 ankle OA will be randomised into two treatment groups: PRP injection or placebo (saline) injection.  
54 Both groups will receive two injections of PRP or placebo at an interval of 6 weeks. Primary outcome  
55 is the American Orthopaedic Foot and Ankle Society (AOFAS) score at 26 weeks. Secondary outcomes  
56 determined at several follow-up moments up to 5 years, include Ankle Osteoarthritis Score (AOS),  
57 Foot and Ankle Outcome Score (FAOS), pain sub-scale of AOFAS (0-40), VAS score (VAS 0-100), Ankle  
58 activity score (AAS 0-10), Subjective patient satisfaction Short form Survey-36 (SF-36), Global  
59 Attainment Scaling (GAS) and the EQ-5D-3L utility score. A cost-effectiveness analysis will be  
60 performed at 1 year.

### 61 **Ethics and dissemination**

62 The study is approved by the Medical Ethics Review Committee Amsterdam Medical Center, the  
63 Netherlands (ABR 2018-042, approved 23-7-2018) and registered in the Netherlands trial register  
64 (NTR 7261). Results and new knowledge will be disseminated through the Dutch Arthritis Association

1  
2  
3 65 (ReumaNederland), Dutch patient federation, conferences and published in a scientific peer-  
4  
5 66 reviewed journal.  
6  
7

8 67 **Trial registration number**  
9

10 68 (NTR7261)  
11  
12

13 69  
14

15 70  
16  
17  
18  
19  
20  
21  
22  
23  
24  
25  
26  
27  
28  
29  
30  
31  
32  
33  
34  
35  
36  
37  
38  
39  
40  
41  
42  
43  
44  
45  
46  
47  
48  
49  
50  
51  
52  
53  
54  
55  
56  
57  
58  
59  
60

For peer review only



1  
2  
3 71 **STRENGTH AND LIMITATIONS**

- 4  
5 72 - This is the first study to evaluate the efficacy and cost-effectiveness of ankle (talocrural) OA in  
6  
7 73 a multi-center, stratified, block-randomized, double-blind, placebo-controlled trial design.  
8  
9 74 - A positive study outcome will have a significant effect on widespread availability and  
10  
11 75 nationwide implementation of an intra articular injection treatment for ankle OA with PRP. A  
12  
13 76 negative outcome (no effect of PRP), will prevent the widespread use of a non-efficacious  
14  
15 77 treatment on patients.  
16  
17 78 - The study population consists only of patients with isolated ankle OA and no concomitant OA  
18  
19 79 in other major joints of the lower extremities that negatively affects their daily activity level  
20  
21 80 - The PRP used in this randomised controlled trial is an available PRP product that is used in  
22  
23 81 clinical practise. However, there is a multitude of commercial PRP products available that differ  
24  
25 82 in their production method and content, and different treatment regimens regarding dose,  
26  
27 83 timing and number of injections are used in clinical practise. The generalizability to other PRP  
28  
29 84 products and treatment regimens remains unknown.  
30  
31 85 - The composition of PRP will not be analysed. This decision was based on the fact that PRP  
32  
33 86 preparation and composition has frequently been analysed and is typically not performed in  
34  
35 87 clinical practice prior to injection.  
36  
37  
38  
39  
40  
41 88  
42  
43  
44  
45  
46  
47  
48  
49  
50  
51  
52  
53  
54  
55  
56  
57  
58  
59  
60

## 89 BACKGROUND AND RATIONALE

90 PRP is a potentially efficacious treatment for ankle OA but its use has not been examined in high  
91 quality studies. Ankle OA is more common than hip or knee OA in the young active population.<sup>1</sup> The  
92 incidence of symptomatic ankle OA is estimated to be 3.4% in the general adult population.<sup>1</sup> Patients  
93 with ankle OA have a quality of life and physical functioning comparable with hip OA, end-stage  
94 kidney disease or congestive heart failure.<sup>2</sup> These relatively young (predominantly female) patients  
95 have an increased risk for decreased work participation and family care. The available surgical  
96 intervention (arthrodesis) is associated with significant functional limitations. In contrast to hip and  
97 knee OA, where joint replacement is an excellent surgical alternative for severe cases, there is a clear  
98 need for effective non-surgical interventions in ankle OA.

99

100 Platelet Rich Plasma (PRP) is defined as plasma containing a concentration of at least 1,000,000  
101 platelets/ $\mu\text{l}$ .<sup>3</sup> Growth factors are stored in  $\alpha$ -granules within platelets, and are released in a selective  
102 manner upon activation. Growth factors released from the  $\alpha$ -granules of platelets are assumed to  
103 provide the regenerative benefits of PRP.

104 Recent reviews concluded that in animal models PRP can diminish multiple inflammatory IL-1  
105 mediated effects.<sup>4</sup> Due to this local anti-inflammatory response, PRP might have an indirect analgesic  
106 effect. The second suggested effect might be protection of the cartilage from destructive pro-  
107 inflammatory interleukines. This is mediated due to an increased mRNA expression of proteoglycan  
108 core protein in the articular cartilage and decreased chondrocyte apoptosis.<sup>4</sup> Consequently, PRP  
109 could positively influence the collagen network of the cartilage.

110

111 Recent systematic reviews on the intra-articular injection therapy in ankle OA found a lack of  
112 evidence from high quality studies to assist in clinical decision-making.<sup>5,6</sup> When compared to placebo  
113 injections, hyaluronic acid or corticosteroid injections, PRP injections might significantly decrease

1  
2  
3 114 pain and improve function in knee OA patients.<sup>7-9</sup> Given the clinical effect on pain reduction in knee  
4  
5 115 OA and a good safety profile, PRP is a promising non-surgical therapy for ankle OA.<sup>10,11</sup> PRP might  
6  
7 116 delay the irreversible surgical options like arthrodesis. No significant adverse events have been  
8  
9  
10 117 reported in any PRP trials regarding ankle OA, knee OA, acute hamstring injuries or Achilles  
11  
12 118 tendinopathy.<sup>8,12-17</sup> Clinical studies on PRP in ankle OA are limited to a single report of 5 cases and a  
13  
14 119 prospective case series of 20 subjects, which both showed safety and significant reduction of pain at  
15  
16 120 a mean of 16 months and 12 weeks follow-up.<sup>14,18</sup> Well-designed prospective Randomised controlled  
17  
18 121 trials (RCT) have not yet been performed.  
19  
20  
21  
22

23  
24  
25  
26  
27  
28  
29  
30  
31  
32  
33  
34  
35  
36  
37  
38  
39  
40  
41  
42  
43  
44  
45  
46  
47  
48  
49  
50  
51  
52  
53  
54  
55  
56  
57  
58  
59  
60

1  
2  
3 123 **METHODS AND DESIGN**

4  
5 124 **Objectives**

6 125 We aim to determine the efficacy of PRP injections in the management of ankle OA by comparing 2  
7  
8 126 groups, both receiving 2 injections of either: PRP or placebo solution. We hypothesize that PRP  
9 127 injections are efficacious for symptom reduction and functional improvement compared to placebo  
10  
11 128 in the treatment of ankle (talocrural) OA.  
12  
13  
14

15  
16 129

17  
18 130 **Study Design**

19 131 The PRIMA study is a multi-center, stratified, block-randomized, double-blind, placebo-controlled  
20  
21 132 trial design will be conducted in order to compare two treatment groups: PRP vs Placebo (saline).  
22  
23 133 After the 26 weeks follow-up of the last patient in the study, the principal investigator and  
24  
25 134 coordinating researcher will be unblinded only after the analysis of the primary outcome. A flow  
26  
27 135 chart of the design and follow-up is shown in figure 1. The study included its first patient in August  
28  
29 136 2018 and aims to include the last patient by January 2021, consequently allowing analysis and then  
30  
31 137 debinding to commence after the last follow-up (26 weeks) of the last patient by July 2021.  
32  
33  
34

35  
36 138

37 139 **Patient involvement**

38  
39  
40 140 *Active patient involvement through reviewing the proposal (Reviewer level):*

41  
42  
43 141 Active involvement of patients during the design phase was performed by 2 patients with ankle OA.

44  
45 142 Both reviewed the grant proposal and provided feedback.  
46  
47

48 143

49  
50  
51 144 *Execution phase - patients will actively contribute:*

52  
53 145 Active patient involvement will be secured by invitation of at least 2 patients for the annual trial

54  
55 146 monitoring and evaluation meetings (Informant level).  
56  
57

58 147  
59  
60

1  
2  
3 148 *Analysis phase - Patient will review and interpret the results (reviewer level):*  
4

5  
6 149 Using the blinded codes of the randomisation groups and after breaking the randomisation code,  
7  
8 150 patients (also active in the design phase) will be given the opportunity to interpret the results from a  
9  
10 151 patient perspective.  
11

12  
13 152

14  
15  
16 153 *Dissemination phase - Patient oriented approach (Advisor level):*  
17

18  
19 154 Results and new knowledge will be disseminated through the Dutch Arthritis Association  
20  
21 155 (ReumaNederland), the Dutch patient federation, conferences and published in a scientific peer-  
22  
23 156 reviewed journal. Dissemination activities will comprise a social media strategy with active patient  
24  
25 157 involvement to share results with online patient communities and an events attendance strategy  
26  
27 158 enabling patient participation in seminars, conferences and workshops.  
28

29  
30 159

31  
32  
33 160 **Fig.1 illustrating** the PRIMA multicentre randomized controlled trial design and follow-up procedure  
34

35 161

## 36 37 38 162 **Study Population**

### 39 40 41 163 **Population (base)**

42  
43 164 Patients with ankle OA in University Medical Centres, teaching hospitals, general hospitals and  
44  
45 165 private specialist clinics will be informed about the study. In order to participate, patients must meet  
46  
47 166 the eligibility criteria documented below.  
48

49  
50 167

### 51 52 53 168 **Inclusion criteria**

- 54  
55  
56 169 1. Severity of Ankle OA pain on a visual analogue scale (VAS) (0–100 mm)  $\geq$  40 mm during daily  
57  
58 170 activities  
59  
60

1  
2  
3 171 2. X-rays (AP and lateral view) indicating  $\geq$  grade 2 talocrural OA on the Van Dijk classification  
4  
5 172 (clarified under section Radiographs)<sup>19</sup>  
6

7 173 3. Age  $\geq$  18 years  
8  
9

10 174

11  
12 175 **Exclusion criteria**  
13

14  
15 176 1. Patient has received injection therapy for ankle OA in the previous 6 months  
16

17 177 2. Patient does not want to receive one of the two therapies  
18

19 178 3. Patient has clinical signs of concomitant OA of one or more other major joints of the lower  
20  
21 extremities that negatively affects their daily activity level  
22 179

23  
24 180 4. Previous ankle surgery for OA or Osteochondral defects (OCD) < 1 year (not including surgery  
25  
26 for an ankle fracture in the past)  
27 181  
28

29 182

30  
31 183 **Radiographs**  
32

33 184 AP and lateral X-rays of the talocrural joints will be scored according to the Van Dijk classification:<sup>19</sup>  
34

35  
36 185 0) Normal joint or subchondral sclerosis  
37

38 186 1) Osteophytes without joint space narrowing  
39

40 187 2) Joint space narrowing with or without osteophytes  
41

42 188 3) (Sub)total disappearance or deformation of the joint space  
43  
44  
45

46 189  
47  
48

49 190 **Randomisation, Blinding and Treatment Allocation**  
50

51 191 We will include patients at the centre of their first outpatient clinic appointment. For each patient  
52  
53 192 the coordinating researcher will prepare a syringe with PRP and a syringe with placebo (isotonic  
54  
55 saline: 0.9% sodium chloride). A Good Clinical Practice (GCP) approved data management system  
56 193  
57  
58 194 (Castor EDC, based in Amsterdam, the Netherlands) will be used to perform a computer generated  
59  
60

1  
2  
3 195 block randomisation scheme with patients stratified to centre with a variable block size of 2,4 or 6.  
4  
5 196 This procedure will ensure treatment allocation concealment. The coordinating researcher, treating  
6  
7 197 physician and patient all remain blinded to the allocated intervention. An independent researcher  
8  
9  
10 198 from the coordinating location will have access to the randomization result and the allocated  
11  
12 199 intervention. This will be relayed to a GCP-certified research assistant at the centre. The research  
13  
14 200 assistant then selects one of the two syringes based on the allocated intervention and blinds the  
15  
16 201 syringe with a covering sheath, ensuring concealment of the content of the syringe. The patients,  
17  
18 202 treating physicians, and coordinating researcher will all be blinded to the allocation of the  
19  
20 203 intervention and to the contents of the syringe. The success of blinding will be assessed by asking  
21  
22 204 patients which injection they think they have received just after the injection procedure, this will  
23  
24  
25 205 then be registered accordingly.  
26  
27  
28 206

29  
30 207 After the 26 weeks follow-up of the last patient in the study, the principal investigator and  
31  
32 208 coordinating researcher will be unblinded only after the analysis of the primary outcome. The  
33  
34 209 patients will remain blinded to the therapy until the 52 weeks follow-up (online questionnaire-  
35  
36 210 appendix 1) of the last patient in the study.  
37  
38

### 39 211 **Intervention**

40 212 In this study, patients will be randomised into two treatment groups: PRP injection or placebo saline  
41  
42 213 injection. For each patient the coordinating researcher will prepare a PRP and a placebo injection  
43  
44 214 (isotonic saline: 0.9% sodium chloride). The PRP syringe will be prepared according to the  
45  
46 215 instructions of the manufacturer.<sup>12</sup> Prior to commencement of the study, the coordinating researcher  
47  
48 216 was trained by a representative of Arthrex, as well as two experienced members of the PRIMA trial  
49  
50 217 research group (GR and RJdV) with a vast scientific experience regarding PRP preparation and  
51  
52 218 injection.<sup>12,13</sup> The PRP will be prepared using a widely used and commercially available system  
53  
54 219 (Arthrex double syringe PRP system, Arthrex Medizinische Instrumente GmbH, Garching, Germany).  
55  
56  
57  
58  
59  
60

1  
2  
3 220 One syringe of 15ml autologous blood will be collected twice from the cubital vein: at inclusion and  
4  
5 221 at a time interval of 6 weeks. After blood collection the syringe will undergo 5 minutes of  
6  
7 222 centrifugation and the injection will be given within 30 minutes following venepuncture to prevent  
8  
9 223 formation of blood clots. No additional substances (calcium, thrombin or citrate) will be added to the  
10  
11 224 PRP solution. For each procedure, 2 ml of PRP or placebo will be prepared and injected into the  
12  
13 225 affected ankle joint under ultrasonographic guidance using a sterile technique. All patients will  
14  
15 226 receive a second injection at 6 weeks, regardless of the effect of the first injection. To guarantee  
16  
17 227 blinding for the allocated treatment of the patient, treatment assessor and treating physician, blood  
18  
19 228 will be drawn and both PRP and placebo will be prepared according to exactly the same procedure  
20  
21 229 for each patient (both at inclusion and at a time interval of 6 weeks after the first injection).  
22  
23 230 However, in the control group, patients will be injected with 2ml of physiological saline instead of  
24  
25 231 PRP. An unblinded research assistant will blind one of the two identical syringes based on the  
26  
27 232 allocated intervention using a specially manufactured covering sheath in order to conceal  
28  
29 233 randomization. Following the intra-articular injection, the syringe covered by the sheath (containing  
30  
31 234 either the remnants of the PRP or saline), is handed to the unblinded research assistant, who will  
32  
33 235 dispose of the syringe, therefore keeping the treating physician and coordinating researcher blinded.  
34  
35 236 After the intervention, patients are advised to avoid heavy or repetitive stress to the ankle joint for a  
36  
37 237 period of 48 hours. Furthermore, patients receive a leaflet containing usual-care healthy lifestyle  
38  
39 238 advice beneficial for ankle OA. This includes losing weight and exercise (avoiding heavy or repetitive  
40  
41 239 ankle loading exercises) such as walking, cycling or swimming.  
42  
43  
44  
45  
46  
47  
48  
49  
50  
51  
52  
53  
54  
55  
56  
57  
58  
59  
60



1  
2  
3 **242 Use of co-intervention**

4 **243** Patients are instructed to avoid the use of co-interventions and non-steroidal anti-inflammatory  
5  
6  
7 **244** drugs if possible, 24 hours prior to the intervention and if possible up to a year after the first  
8  
9 **245** injection. Throughout the study, key treatment (including usual care: exercise therapy and healthy  
10  
11 **246** life style advice) and co-interventions used by patients will be registered, such as non-steroidal anti-  
12  
13  
14 **247** Inflammatory drugs, other analgesic drugs, intra-articular injections or inlays.  
15

16  
17 **248**

18 **249 Study Procedures**

19  
20 **250** In the event the patient meets the criteria for inclusion and exclusion, the patient will be informed in  
21  
22 **251** more detail about the study procedure. At that time the patient can ask questions about the study  
23  
24 **252** and decide whether they will participate and sign the informed consent form. Subsequently the  
25  
26 **253** patient will proceed to inclusion and the randomization procedure.  
27  
28

29  
30 **254**

31 **255 Inclusion**

32  
33 **256** Patients are recruited for inclusion by their treating physicians at location. Following inclusion PRP  
34  
35 **257** will be prepared according to the PRP system instructions of the manufacturer. During the first two  
36  
37 **258** consultations a total of two intra-articular injections will be documented with a time interval of 6  
38  
39 **259** weeks. The patient will have no additional costs to usual care as a result of taking part in this study.  
40  
41  
42 **260** Physical examination will be performed on three occasions up to 26 weeks from baseline. Patient  
43  
44 **261** Reported Outcome Measures (PROMs) will be used to evaluate the treatment effect up to five years.  
45  
46  
47 **262** A cost-effectivity analysis will be performed at one year using the PRODISQ questionnaire. The time-  
48  
49 **263** frame of the follow-up questionnaires is further illustrated in table 1. Questionnaires will be  
50  
51 **264** managed and distributed digitally using a GCP approved data management system (Castor EDC)  
52  
53

54 **265**

55  
56 **266**  
57  
58  
59  
60

| Follow-up |                                                                                                                                                                                                  |
|-----------|--------------------------------------------------------------------------------------------------------------------------------------------------------------------------------------------------|
| Baseline  | <ul style="list-style-type: none"> <li>- 1<sup>st</sup> intervention injections</li> <li>- Physical Examination</li> <li>- AOFAS</li> <li>- PROMs</li> <li>- PRODISQ cost-effectivity</li> </ul> |
| 6 weeks   | <ul style="list-style-type: none"> <li>- 2<sup>nd</sup> intervention injection</li> <li>- Physical Examination</li> <li>- AOFAS</li> <li>- PROMs</li> </ul>                                      |
| 12 weeks  | <ul style="list-style-type: none"> <li>- AOFAS</li> <li>- PROMs</li> <li>- PRODISQ cost-effectivity</li> </ul>                                                                                   |
| 26 weeks  | <ul style="list-style-type: none"> <li>- AOFAS</li> <li>- PROMs</li> <li>- PRODISQ cost-effectivity</li> </ul>                                                                                   |
| 39 weeks  | <ul style="list-style-type: none"> <li>- PRODISQ cost-effectivity</li> </ul>                                                                                                                     |
| 52 weeks  | <ul style="list-style-type: none"> <li>- AOFAS</li> <li>- PROMs</li> <li>- PRODISQ cost-effectivity</li> </ul>                                                                                   |
| 5 years   | <ul style="list-style-type: none"> <li>- AOFAS</li> <li>- PROMs</li> </ul>                                                                                                                       |

267 *Table 1. In addition to the American Orthopaedic Foot and Ankle Society (AOFAS) score, the following*  
268 *PROMs will be taken: Foot and Ankle Outcome Score (FAOS), Ankle Osteoarthritis Score (AOS), Visual*  
269 *Analogue Scale (VAS), Ankle activity score (AAS), Subjective patient satisfaction, Short Form Health*  
270 *Survey (SF-36), The Global Attainment Scaling (GAS), EuroQol-5 dimensions-3 levels (EQ-5D-3L). These*  
271 *PROMs will be elaborated on further on. Furthermore the PROductivity and DISease Questionnaire*  
272 *(PRODISQ) will be used to perform a cost-effectivity analysis. These questionnaires can be found in*  
273 *appendix 1*

274

### 275 **Replacement of individual patients after withdrawal**

276 In the sample size calculation we compensated for an expected loss of 10% of patients to follow-up.

277 No patients will be replaced after withdrawal.

278

### 279 **Safety**

1  
2  
3 280 All adverse events reported spontaneously by the patient or observed by the investigator or his staff  
4  
5 281 will be recorded. A variety of conditions have been treated with PRP ranging from muscle and tendon  
6  
7 282 injuries to intra-articular injections of the knee and ankle. To date, no serious adverse events have  
8  
9 283 been documented in the literature, concerning PRP intra-articular injections of the ankle. In  
10  
11 284 accordance with the Central Committee on Research Involving Human Subjects (CCMO) guidelines,  
12  
13 285 this study was classified as low-risk for adverse events. Therefore, the local Medical Ethical  
14  
15 286 Commission will be notified of any serious adverse events. In the event this happens, the advice of  
16  
17 287 the Medical Ethical Commission will be followed accordingly.  
18  
19  
20  
21  
22  
23

## 24 289 **Outcome Measures**

### 25 26 27 290 **Primary study parameter/endpoint**

28  
29 291 The primary objective of this study will be to quantify pain or functional improvement using the  
30  
31 292 American Orthopaedic Foot and Ankle Society (AOFAS) score at 26 weeks follow-up. Studies  
32  
33 293 evaluating the efficacy of PRP in knee OA maintained a follow-up between 3 and 12 months. We  
34  
35 294 therefore opted to take 26 weeks for our primary outcome measure.<sup>10</sup> The AOFAS is a validated scale  
36  
37 295 for ankle OA (0-100) measuring three subdomains (pain, function and alignment) which together  
38  
39 296 total nine items.<sup>20-23</sup> The subdomain of pain is measured by one item where a maximal score of 40  
40  
41 297 indicates no pain. Function consists of 7 items where full function is indicated by the maximal score  
42  
43 298 of 50 points. Similar to the pain subdomain, alignment has a potential maximum score of 10 points  
44  
45 299 using one item, indicating good alignment.<sup>20,21</sup> The AOFAS questionnaire, having undergone forward  
46  
47 300 and backward translation to Dutch by de Boer et al. 2017, has an excellent internal consistency  
48  
49 301 (Cronbach's  $\alpha$  0.947) and an excellent test-retest reliability (ICC 0.93).<sup>20</sup>  
50  
51  
52  
53  
54

### 55 302 **Secondary study parameters/endpoints**

56  
57 303 Secondary outcome measures are a number of other Patient Reported Outcome Measures (PROMs).  
58  
59 304 Specific time points of the secondary outcome measures can be found in Table 1.  
60

- 1  
2  
3 305 1. Ankle Osteoarthritis Score (AOS) is a visual analog scale from 0 – 100 mm with 18 questions;  
4  
5 306 9 relating to pain and 9 relating to disability.
- 6  
7 307 2. Foot and Ankle Outcome Score (FAOS). Each question is assigned 0 – 4 points based on the  
8  
9 308 answer given. The scale runs from 0 (extreme symptoms) to 100 points (no symptoms).
- 10 309 3. In order to evaluate pain, the pain sub-scale of AOFAS (0-40 points) will be analysed. On this  
11  
12 310 scale the lower the score the more pain the patient has. Additionally a VAS score (VAS 0-100  
13  
14 311 mm) is measured during activities of daily living, with 0 mm being no pain and 100 mm the  
15  
16 312 worst pain imaginable.
- 17  
18 313 4. Total AOFAS score at the other time points than the primary one (at 6, 12 and 52 weeks as  
19  
20 314 well as 5 years).
- 21 315 5. Ankle activity score (0-10 points) is scored according to chart based on the performable  
22  
23 316 activity level
- 24  
25 317 6. Subjective patient satisfaction (4 categories) Poor, Fair, Good, Excellent
- 26  
27 318 7. Short Form Health Survey SF-36 is a health-related quality of life score (0-100 points). The  
28  
29 319 higher the patient scores, the higher the disability.
- 30 320 8. The Global Attainment Scaling (GAS) is a method of scoring based on achievement related to  
31  
32 321 pre-determined goals in agreement with the patient. Points are subtracted for not achieving  
33  
34 322 the pre-defined goals or vice versa. Scores range from 100 (high functioning) to 0 (severely  
35  
36 323 impaired)
- 37 324 9. EuroQol-5 dimensions-3 levels (EQ-5D-3L) utility score allows a patient's health to be defined  
38  
39 325 by a 5-digit number.
- 40  
41 326 10. PROductivity and DISease Questionnaire (PRODISQ) will be used to determine indirect costs  
42  
43 327 and direct costs cost effectivity. The PRODISQ questionnaire is taken at baseline and every 3  
44  
45 328 months thereafter up until 1 year. This will be done in conjunction with the EQ-5D-3L.
- 46  
47  
48  
49  
50  
51  
52  
53  
54  
55  
56  
57  
58

59 330 **Loss to follow-up**

60

1  
2  
3 331 The coordinating researcher will attempt to limit loss to follow-up as much as possible by contacting  
4  
5 332 every patient and being present at every patient visit. All digital questionnaires will be constantly  
6  
7 333 monitored to ensure they are being filled in and otherwise followed-up by the coordinating  
8  
9 334 researcher. In the event of patient withdrawal, an analysis of demographic and prognostic  
10  
11 335 characteristics will be done on these cases and the remaining patients. As previously described by  
12  
13 336 Järvinen et al. 2014, we will document the patient eligible for and compliant with each follow-up.<sup>24</sup>  
14  
15  
16  
17  
18  
19  
20  
21  
22  
23  
24  
25  
26  
27  
28  
29  
30  
31  
32  
33  
34  
35  
36  
37  
38  
39  
40  
41  
42  
43  
44  
45  
46  
47  
48  
49  
50  
51  
52  
53  
54  
55  
56  
57  
58  
59  
60

For peer review only

1  
2  
3 339 **Missing items**  
4

5 340 Missing items of a score will be handled according to the instructions of the specific scales. In the  
6  
7 341 event of no instructions, we will calculate the percentage of missing items on a scale. Due to the  
8  
9 342 potential impact on trial conclusions, multiple imputation (if more than 10% missing items on a scale)  
10  
11  
12 343 will be applied.  
13

14 344  
15 345 **Sample Size**

16 346 Based on previous and ongoing studies, the study protocol of the randomised controlled trial is  
17  
18 347 designed to detect a difference of 12 points (0-100) on the AOFAS score. There is no official  
19  
20 348 agreement on the minimal clinical important difference for the AOFAS score regarding ankle OA.  
21  
22 349 However in reliable musculoskeletal literature, 10% – 15% of the used scale was reported.<sup>13,25,26</sup>  
23  
24 350 Our pre-defined minimal clinical important difference of 12 % is located within this range.<sup>13,25,26</sup>  
25  
26 351 Based on a previous placebo controlled RCT on injection therapy (hyaluronic acid) in ankle OA of De  
27  
28 352 Groot et al. a standard deviation of 16.3 can be expected.<sup>6</sup> Taking into account a two-sided level of  
29  
30 353 significance of 5%, a power of 90% and a dropout rate of 10%, approximately 50 (45 plus 10% drop  
31  
32 354 out) patients per group will be needed (N=100 in total).  
33  
34  
35

36  
37 355 **Data Management**  
38

39 356 After giving permission for participating in this study, patients will receive a link to fill in digital  
40  
41 357 surveys. All data gained outside Castor EDC will be stored on the AMC secured hard drive. All data  
42  
43 358 will be coded and stored in the Castor EDC online database which meets the AMC safety criteria and  
44  
45 359 good clinical practice guidelines. The primary investigator and project leader will safeguard the coded  
46  
47 360 data through password secured access. All patient's data will be archived for at least 15 years and  
48  
49 361 handled with in accordance with the Dutch Personal Data Protection Act (Wbp). Data protection is  
50  
51 362 provided through the safety protocol of Castor EDC with automated backups and SSL security.  
52  
53  
54  
55

56 363 **Statistical analysis**  
57

58 364 A standard operating procedure will be available to logically recode and clean the data. The data will  
59  
60 365 be interpreted according to a blinded data interpretation scheme described by Järvinen et al, 2014.<sup>24</sup>

1  
2  
3 366 A statistical expert (SB) is present among the authors. The authors will interpret the statistical results  
4  
5 367 until a consensus is reached. Once the authors are in agreement the two groups will be unblinded  
6  
7 368 and no changes will be made to the interpretation of the results.  
8  
9

#### 10 369 **Baseline characteristics**

11  
12  
13 370 Baseline characteristics will be analyzed between groups using descriptive statistics.  
14  
15

#### 16 371 **Primary outcome measure**

17  
18 372 Analysis will be performed using an intention to treat approach. To test for the effect of treatment  
19  
20 373 on the between-group difference in primary outcome, we will use a repeated measurement general  
21  
22 374 linear model. Changes from baseline to all follow-up time points will be included in the model.  
23  
24 375 Adjustments will be made for those baseline variables that influenced the primary outcome with  $p <$   
25  
26 376 0.10.  
27  
28  
29

30 377

#### 31 32 33 378 **Secondary outcome measures**

34  
35 379 To test for the effect of treatment on between-group differences in secondary outcomes, we will use  
36  
37 380 the repeated measurement general linear model. Changes from baseline to all follow-up time points  
38  
39 381 will be included in the model.  
40  
41  
42

#### 43 382 **Economic analysis**

44  
45 383 In the event of a positive significant outcome, an economic analysis is needed to support a possible  
46  
47 384 change of practice. An economic analysis (costs) will be performed in order to determine cost-  
48  
49 385 effectiveness.  
50  
51

52  
53 386 We will assess the differences in mean quality-adjusted life years (QALYs), costs, and net benefits  
54  
55 387 between the PRP injection group and the placebo group using linear models. We express the cost-  
56  
57 388 effectiveness by using cost-effectiveness acceptability curves from both a healthcare perspective and  
58  
59 389 a societal perspective. With multiple bootstrap replicates of the average difference in costs and  
60

1  
2  
3 390 effects in the incremental cost-effectiveness plane we will express the uncertainty of our cost-  
4  
5 391 effectiveness analysis.  
6  
7

8 392 The cost-effectivity analysis will be performed with a 1-year time horizon. We use the three-level  
9  
10 393 EQ-5D questionnaire (Euroqol, Rotterdam, the Netherlands) to calculate QALYs as the area under the  
11  
12 394 curve of the utility scores measured over 12 months, according to the Dutch pricing system. The  
13  
14 395 analysis will be based on indirect costs and direct costs and will be determined using the PRODISQ  
15  
16 396 questionnaire. The PRODISQ questionnaire is taken at baseline and every 3 months thereafter up  
17  
18 397 until 1 year.  
19  
20  
21

22 398

#### 23 24 399 **Monitoring committee**

25  
26  
27 400 The PRIMA trial will be monitored by the clinical research unit (CRU) of the coordination study  
28  
29 401 centre. The CRU aims to improve the quality of clinical research and ultimately, patient care. Before  
30  
31 402 the PRIMA trial commenced, a monitoring plan was set-up. This Monitoring plan facilitates  
32  
33 403 compliance with the Human Research Act (WMO), Good Clinical Practice (ICH-GCP) guidelines  
34  
35 404 (5.18.1) and/ or ISO14155, which require monitors to verify that (a) the rights and well-being of  
36  
37 405 human subjects are protected,  
38  
39 406 (b) recorded study data is accurate, complete, and verifiable with the source documents,  
40  
41 407 (c) the conduct of the study is compliant with the currently approved protocol and with applicable  
42  
43 408 laws regulatory requirements, e.g. WMO, ICH-GCP, ISO14155.  
44  
45  
46  
47  
48

49 409 Throughout the study, monitoring will be performed at initiation of the trial, at each participating  
50  
51 410 centre once approximately 3 patients have been enrolled, after approximately 10 – 15 enrolled  
52  
53 411 patients have completed the 26 week follow-up, after 70 patients have been enrolled and after  
54  
55 412 database lock.  
56  
57

58 413  
59  
60



## 414 **Ethics and Dissemination**

415 The study is approved by the local Medical Ethics Review Committee Amsterdam Medical Center,  
416 Amsterdam, the Netherlands (ABR 2018-042, approved 23-7-2018) and is registered in the  
417 Netherlands trial register (NTR 7261) in accordance with the World Health Organization Data Set  
418 (WHO Data Set). In the events of amendments or other changes, co-researchers will be notified. If  
419 relevant patients participating will also be notified. Intellectual data will be the property of the  
420 PRIMA study group. Participant data that underline the results reported in this article following de-  
421 identification will be shared anonymously on request following publication. Data will be shared,  
422 wherever legally and ethically possible and in line with ICMJE guidelines, with researchers who  
423 provide a methodologically sound proposal. Data will be stored in a repository (Figshare) under  
424 management of the medical library of the AMC. Any proposal should contain: Title, Background,  
425 Rationale, Objective, Methods (eligibility criteria, variables and timeframe of interest, statistical  
426 plan), Information regarding publication including authorship.

428 The results of this project study and new knowledge will be disseminated through the Dutch Arthritis  
429 Association (ReumaNederland), presentations, news publications, blogs, websites social media and  
430 professional organisations (rheumatology, orthopaedics, primary care medicine, sports medicine,  
431 public health) and the Dutch patient federation (Patiëntenfederatie Nederland). The patients will also  
432 be informed about the results of the study. The study will be conducted according to the principles of  
433 the Declaration of Helsinki, GCP and the Medical Research Involving Human Subjects Act (WMO). The  
434 board of each participating hospital reviewed and approved the local feasibility. Monitoring and  
435 auditing will be carried out throughout the study. In the event of Serious Adverse Events, these will  
436 be documented and reported to the monitor and the Medical Ethics board. Eligible patients will be  
437 informed of the study and will sign an informed consent form before participating (acquired by  
438 researchers associated with the study). Provisions for post-trial care as compensation for those who  
439 suffer harm from trial participation is documented in the patient information.

## 440 Discussion

441 This is the first study evaluating the efficacy and cost-effectiveness of Platelet-rich Plasma injections  
442 in the treatment of ankle OA with a multi-center, stratified, block-randomized, double-blind,  
443 placebo-controlled design. The primary outcome is the AOFAS score at 26 weeks. Our study will also  
444 evaluate the long term efficacy of PRP for up to five years.

445

446 Platelet-rich Plasma has been shown to alleviate symptoms of patients suffering from knee OA.<sup>11</sup> In  
447 the absence of effective evidence-based non-surgical interventions for ankle OA, PRP would fulfil a  
448 clear clinical need. Previous trials concerned with the efficacy of PRP for multiple indications are  
449 usually of low quality and adhere to a follow-up of 26 weeks or shorter. Furthermore a cost-  
450 effectiveness analysis has never been performed in previous trials on PRP in the treatment of OA.

451 A positive study outcome would have a significant impact leading to change in clinical practice, where  
452 PRP could be offered as a non-surgical intervention. A negative outcome will prevent the widespread  
453 use of a non-efficacious treatment.

454 This study has potential limitations. First of all, due to financial constraints, (semi-quantitative) MRI-  
455 defined cartilage degenerative changes will not be used as a secondary outcome score. Furthermore,  
456 the composition of PRP is not analysed. This decision is based on the fact that PRP preparation and  
457 composition has frequently been analysed and is typically not performed in clinical practice prior to  
458 injection.<sup>27</sup> The PRP we use ( Hettich Rotofix32 A centrifuge and Arthrex syringes) is one out of a  
459 multitude of commercially available PRP products. All these products differ in their production  
460 method and content, and different treatment regimens regarding dose, timing and number of  
461 injections are used in clinical practice. The generalizability to other PRP products and treatment  
462 regimens remains unknown.

463

## 464 Conclusion

1  
2  
3 465 This will be the first randomized controlled trial to assess the efficacy and cost-effectiveness of PRP in  
4  
5 466 ankle OA.

6  
7  
8 467

9  
10  
11 468 **Contributor ship statement**

12  
13 469 All authors have been actively involved in creating and writing the study protocol, and all authors  
14  
15 470 critically commented on the paper and gave their final approval of the version that we submitted.

16  
17  
18 471 *Authorship was and for future publications will be, determined according to the ICMJE authorship*  
19  
20 472 *recommendations:*

21  
22  
23 473 “Substantial contributions to the conception or design of the work; the acquisition, analysis, or  
24  
25 474 interpretation of data for the work;

26  
27  
28 475 L.D.A. Paget, S.M.A. Bierma – Zeinstra, S. Goedegebuure, G.M.M.J. Kerkhoffs, R. Krips, M. Maas, M.  
29  
30 476 H. Moen, G. Reurink, S. A. S. Stufkens, R.J. de Vos, A. Weir, J.L. Tol

31  
32  
33 477 Drafting the work or revising it critically for important intellectual content;

34  
35  
36 478 L.D.A. Paget S.M.A. Bierma – Zeinstra, G.M.M.J. Kerkhoffs, G. Reurink, R.J. de Vos, A. Weir, J.L. Tol

37  
38 479 Final approval of the version to be published;

39  
40  
41 480 L.D.A. Paget, S.M.A. Bierma – Zeinstra, S. Goedegebuure, G.M.M.J. Kerkhoffs, R. Krips, M. Maas, M.  
42  
43 481 H. Moen, G. Reurink, S. A. S. Stufkens, R.J. de Vos, A. Weir, J.L. Tol

44  
45  
46 482 Agreement to be accountable for all aspects of the work in ensuring that questions related to the  
47  
48 483 accuracy or integrity of any part of the work are appropriately investigated and resolved.

49  
50  
51 484 L.D.A. Paget, S.M.A. Bierma – Zeinstra, S. Goedegebuure, G.M.M.J. Kerkhoffs, R. Krips, M. Maas, M.  
52  
53 485 H. Moen, G. Reurink, S. A. S. Stufkens, R.J. de Vos, A. Weir, J.L. Tol

54  
55  
56 486

57  
58  
59 487

1  
2  
3 488 **Competing interests**  
4

5  
6 489 All authors have completed the ICMJE uniform disclosure form at [www.icmje.org/coi\\_disclosure.pdf](http://www.icmje.org/coi_disclosure.pdf)  
7  
8 490 and declare: no support from any organisation for the submitted work; no financial relationships with  
9  
10 491 any organisations that might have an interest in the submitted work in the previous three years; no  
11  
12 492 other relationships or activities that could appear to have influenced the submitted work.  
13  
14

15 493  
16

17  
18 494 **Funding**  
19

20  
21 495 This multicenter Randomized Controlled Trial was supported by a grant from the Dutch Arthritis  
22  
23 496 Foundation (ReumaNederland). The Dutch Arthritis Foundation will not, and has not had any role  
24  
25 497 regarding study design, collection, management, analysis, data interpretation or writing of the  
26  
27 498 report. Furthermore, the Dutch Arthritis Foundation does not have authority over report submission  
28  
29 499 or publication.  
30  
31

32  
33  
34 500 **Figure legends/captions**  
35

36 501 Fig.1 illustrating the PRIMA multicentre randomized controlled trial design and follow-up procedure  
37  
38  
39  
40  
41  
42  
43  
44  
45  
46  
47  
48  
49  
50  
51  
52  
53  
54  
55  
56  
57  
58  
59  
60

502 **References**

- 503 1. Murray C, Marshall M, Rathod T, Bowen CJ, Menz HB, Roddy E. Population prevalence and  
504 distribution of ankle pain and symptomatic radiographic ankle osteoarthritis in  
505 community dwelling older adults: A systematic review and cross-sectional study. *PLoS*  
506 *One*. 2018. doi:10.1371/journal.pone.0193662
- 507 2. Saltzman CL. Impact of Comorbidities on the Measurement of Health in Patients with  
508 Ankle Osteoarthritis. *J Bone Jt Surg*. 2006;88(11):2366. doi:10.2106/JBJS.F.00295
- 509 3. Marx RE. Platelet-rich plasma (PRP): What is PRP and what is not PRP? *Implant Dent*.  
510 2001. doi:10.1097/00008505-200110000-00002
- 511 4. Zhu Y, Yuan M, Meng HY, et al. Basic science and clinical application of platelet-rich  
512 plasma for cartilage defects and osteoarthritis: A review. *Osteoarthr Cartil*.  
513 2013;21(11):1627-1637. doi:10.1016/j.joca.2013.07.017
- 514 5. Vannabouathong C, Del Fabbro G, Sales B, et al. Intra-articular Injections in the Treatment  
515 of Symptoms from Ankle Arthritis: A Systematic Review. *Foot Ankle Int*.  
516 2018;107110071877937. doi:10.1177/1071100718779375
- 517 6. DeGroot H, Uzunishvili S, Weir R, Al-omari A, Gomes B. Intra-articular injection of  
518 hyaluronic acid is not superior to saline solution injection for ankle arthritis: a  
519 randomized, double-blind, placebo-controlled study. *J Bone Joint Surg Am*. 2012;94(1):2-  
520 8. doi:10.2106/JBJS.J.01763
- 521 7. Meheux CJ, McCulloch PC, Lintner DM, Varner KE, Harris JD. Efficacy of Intra-articular  
522 Platelet-Rich Plasma Injections in Knee Osteoarthritis: A Systematic Review. *Arthrosc - J*  
523 *Arthrosc Relat Surg*. 2016;32(3):495-505. doi:10.1016/j.arthro.2015.08.005
- 524 8. Laudy ABM, Bakker EWP, Rekers M, Moen MH. Efficacy of platelet-rich plasma injections  
525 in osteoarthritis of the knee: a systematic review and meta-analysis. *Br J Sports Med*.  
526 2015;49(10):657-672. doi:10.1136/bjsports-2014-094036
- 527 9. Moen M, Weir A, Bakker E, Rekers M, Laudy G. Efficacy of platelet-rich plasma injections  
528 in osteoarthritis of the knee: an updated systematic review and meta-analysis. *Osteoarthr*  
529 *Cartil*. 2016;24:S520-S521. doi:10.1016/j.joca.2016.01.953
- 530 10. Xing D, Wang B, Zhang W, et al. Intra-articular platelet-rich plasma injections for knee  
531 osteoarthritis: An overview of systematic reviews and risk of bias considerations. *Int J*  
532 *Rheum Dis*. 2017;20(11):1612-1630. doi:10.1111/1756-185X.13233
- 533 11. Dai WL, Zhou AG, Zhang H, Zhang J. Efficacy of Platelet-Rich Plasma in the Treatment of  
534 Knee Osteoarthritis: A Meta-analysis of Randomized Controlled Trials. *Arthrosc - J*  
535 *Arthrosc Relat Surg*. 2017. doi:10.1016/j.arthro.2016.09.024
- 536 12. Reurink G, Goudswaard GJ, Moen MH, et al. Platelet-Rich Plasma Injections in Acute

- 1  
2  
3 537 Muscle Injury. *N Engl J Med*. 2014;370(26):2546-2547. doi:10.1056/NEJMc1402340  
4  
5  
6 538 13. de Vos RJ, Weir A, van Schie HTM, et al. Platelet-rich plasma injection for chronic Achilles  
7 539 tendinopathy: a randomized controlled trial. *JAMA*. 2010;303(2):144-149.  
8 540 doi:10.1001/jama.2009.1986  
9  
10  
11 541 14. Fukawa T, Yamaguchi S, Akatsu Y, Yamamoto Y, Akagi R, Sasho T. Safety and Efficacy of  
12 542 Intra-articular Injection of Platelet-Rich Plasma in Patients With Ankle Osteoarthritis.  
13 543 *Foot Ankle Int*. 2017;38(6):596-604. doi:10.1177/1071100717700377  
14  
15  
16 544 15. Repetto I, Biti B, Cerruti P, Trentini R, Felli L. Conservative Treatment of Ankle  
17 545 Osteoarthritis: Can Platelet-Rich Plasma Effectively Postpone Surgery? *J Foot Ankle Surg*.  
18 546 2017;56(2):362-365. doi:10.1053/j.jfas.2016.11.015  
19  
20  
21 547 16. Pas HI, Reurink G, Tol JL, Weir A, Winters M, Moen MH. Efficacy of rehabilitation  
22 548 (lengthening) exercises, platelet-rich plasma injections, and other conservative  
23 549 interventions in acute hamstring injuries: an updated systematic review and meta-  
24 550 analysis. *Br J Sports Med*. 2015;49(18):1197-1205. doi:10.1136/bjsports-2015-094879  
25  
26  
27 551 17. Hamilton B, Tol JL, Almusa E, et al. Platelet-rich plasma does not enhance return to play in  
28 552 hamstring injuries: a randomised controlled trial. *Br J Sports Med*. 2015;49(14):943-950.  
29 553 doi:10.1136/bjsports-2015-094603  
30  
31  
32 554 18. Angthong C, Khadsongkram A, Angthong W. Outcomes and quality of life after platelet-  
33 555 rich plasma therapy in patients with recalcitrant hindfoot and ankle diseases: A  
34 556 preliminary report of 12 patients. *J Foot Ankle Surg*. 2013;52(4):475-480.  
35 557 doi:10.1053/j.jfas.2013.04.005  
36  
37  
38 558 19. van Dijk CN, Verhagen R a, Tol JL. Arthroscopy for problems after ankle fracture. *J Bone Jt*  
39 559 *Surg*. 1997;79-B(2):280-284. doi:10.1302/0301-620X.79B2.7153  
40  
41  
42 560 20. De Boer AS, Tjioe RJC, Van Der Sijde F, et al. The American Orthopaedic Foot and Ankle  
43 561 Society Ankle-Hindfoot Scale; Translation and validation of the Dutch language version  
44 562 for ankle fractures. *BMJ Open*. 2017;7(8):1-12. doi:10.1136/bmjopen-2017-017040  
45  
46  
47 563 21. Kitaoka HB, Alexander IJ, Adelaar RS, Nunley JA, Myerson MS, Sanders M. Clinical rating  
48 564 systems for the ankle-hindfoot, midfoot, hallux, and lesser toes. *Foot ankle Int*.  
49 565 1994;15(7):349-353. doi:10.1177/107110079401500701  
50  
51  
52 566 22. Sayyed-Hosseini S-H, Hassankhani GG, Bagheri F, Alavi N, Shojaie B, Mousavian A.  
53 567 Validation of the Persian Version of the American Orthopedic Foot and Ankle Society  
54 568 Score (AOFAS) Questionnaire. *Arch bone Jt Surg*. 2018;6(3):233-239.  
55 569 doi:10.1097/PHM.0000000000000234  
56  
57  
58 570 23. Vosoughi AR, Roustaei N, Mahdaviazad H. American Orthopaedic Foot and Ankle Society  
59 571 ankle-hindfoot scale: A cross-cultural adaptation and validation study from Iran. *Foot*  
60 572 *Ankle Surg*. 2018. doi:10.1016/j.fas.2017.02.007

- 1  
2  
3 573 24. Järvinen TLN, Sihvonen R, Bhandari M, et al. Blinded interpretation of study results can  
4 574 feasibly and effectively diminish interpretation bias. *J Clin Epidemiol*. 2014;67(7):769-  
5 575 772. doi:10.1016/j.jclinepi.2013.11.011  
6  
7  
8 576 25. Pham T, van der Heijde D, Altman RD, et al. OMERACT-OARSI initiative: Osteoarthritis  
9 577 research society international set of responder criteria for osteoarthritis clinical trials  
10 578 revisited. *Osteoarthr Cartil*. 2004. doi:10.1016/j.joca.2004.02.001  
11  
12  
13 579 26. Rozendaal RM, Koes BW, Van Osch GJVM, et al. Effect of glucosamine sulfate on hip  
14 580 osteoarthritis: A randomized trial. *Ann Intern Med*. 2008. doi:10.7326/0003-4819-148-4-  
15 581 200802190-00005  
16  
17  
18 582 27. Oudelaar BW, Peerbooms JC, Huis in 't Veld R, Vochteloo AJH. Concentrations of Blood  
19 583 Components in Commercial Platelet-Rich Plasma Separation Systems: A Review of the  
20 584 Literature. *Am J Sports Med*. 2018. doi:10.1177/0363546517746112  
21  
22  
23 585

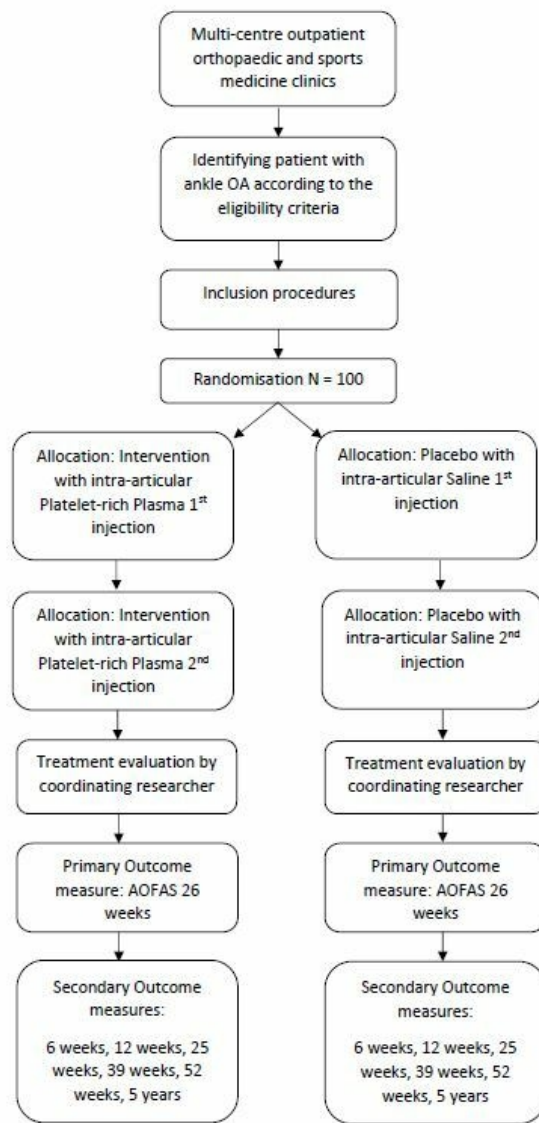

Fig.1 illustrating the PRIMA multicentre randomized controlled trial design and follow-up procedure

39x67mm (300 x 300 DPI)



# Surveys of PRIMA trial - version 83.01

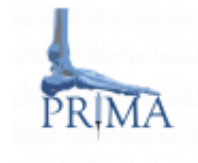

Printed on 16-09-2019 11:34:13 by Liam Paget

## Survey 'Vragenlijst PRIMA studie'

### Vragenlijst PRIMA studie - AOFAS - Pijn

| Number | Question                             | Answers                                                                                                                                                                                                         |
|--------|--------------------------------------|-----------------------------------------------------------------------------------------------------------------------------------------------------------------------------------------------------------------|
| 1.1    | Hoeveel pijn ervaart u aan uw voet?? | <input type="checkbox"/> Geen<br><input type="checkbox"/> Milde pijnklachten of af en toe pijn<br><input type="checkbox"/> Matige pijnklachten, dagelijks<br><input type="checkbox"/> Vrijwel continu erge pijn |

### Vragenlijst PRIMA studie - AOFAS resterende gedeelte

| Number | Question                                              | Answers                                                                                                                                                                                                                                                                                                                                                                                                                                              |
|--------|-------------------------------------------------------|------------------------------------------------------------------------------------------------------------------------------------------------------------------------------------------------------------------------------------------------------------------------------------------------------------------------------------------------------------------------------------------------------------------------------------------------------|
| 2.1    | Hoeveel beperkingen in het dagelijks leven ervaart u? | <input type="radio"/> Geen beperkingen, geen hulpmiddelen nodig<br><input type="radio"/> Geen beperkingen in algemeen dagelijkse bezigheden, wel beperkingen in recreatieve activiteiten (sport, hobbies, etc) geen ondersteuning<br><input type="radio"/> Beperkingen bij dagelijkse- en recreatieve activiteiten, stok<br><input type="radio"/> Ernstige beperkingen bij dagelijkse- en recreatieve activiteiten, walker, krukken, rolstoel, brace |
| 2.2    | Wat is de afstand die u in één keer kunt lopen?       | <input type="radio"/> Meer dan 600 meter<br><input type="radio"/> 400 - 600 meter<br><input type="radio"/> 100 - 300 meter<br><input type="radio"/> Minder dan 100 meter                                                                                                                                                                                                                                                                             |
| 2.3    | Heeft u moeite met lopen op een bepaalde ondergrond?  | <input type="radio"/> Geen problemen bij lopen<br><input type="radio"/> Enig problemen op ongelijke ondergrond, trap, helling, ladders<br><input type="radio"/> Ernstige problemen bij ongelijke ondergrond, trap, helling, ladders                                                                                                                                                                                                                  |

- 1  
2  
3  
4  
5  
6  
7
- 2.4 Hoe zou u uw looppatroon beoordelen?  Normaal of minimaal afwijkend  
 Duidelijk  
 Ernstig
- 8  
9  
10  
11  
12  
13  
14
- 2.5 Hoe zou u de beweeglijkheid van uw voet beoordelen ten opzichte van de andere zijde of ten opzichte van vóór het ongeval?  Hetzelfde of licht beperkt t.o.v. de niet aangedane zijde of zoals voor het ongeval  
 Ongeveer de helft beperkt  
 Sterk verminderd, bijna geen bewegingen mogelijk
- 15  
16  
17  
18  
19  
20  
21  
22
- 2.6 Hoe zou u de beweeglijkheid van uw enkel beoordelen ten opzichte van de andere zijde of ten opzichte van voor het ongeval?  Hetzelfde of licht beperkt t.o.v. de niet aangedane zijde of zoals voor het ongeval  
 Ongeveer de helft beperkt  
 Sterk verminderd, bijna geen bewegingen mogelijk
- 23  
24  
25  
26  
27  
28
- 2.7 Hoe zou u de stabiliteit van uw voet en enkel beoordelen  Stabiel, ik verzwik mijn enkel hooguit incidenteel  
 Niet stabiel, ik verzwik mijn enkel vaak
- 29  
30  
31  
32  
33  
34  
35  
36  
37  
38  
39  
40  
41  
42  
43
- 2.8 Hoe zou u de stand van uw voet beoordelen ten opzichte van de andere zijde of ten opzichte van voor het ongeval?  Goed, ik kan mijn voet goed plat op de grond zetten, waarbij de stand niet afwijkend is  
 Ik sta vrijwel alleen op de buitenzijde van mijn voet  
 Ik kan mijn voet niet plat op de grond zetten en loop vrijwel alleen op mijn voorvoet

## Vragenlijst PRIMA studie - VAS Pain score

| Number | Question                                                                                                                                                             | Answers             |
|--------|----------------------------------------------------------------------------------------------------------------------------------------------------------------------|---------------------|
| 3.1    | VAS pijnscore (Geef uw minimaal pijnscore aan tijdens dagelijkse activiteiten op een schaal van 0 tot 100, waarbij 0 geen pijn is en 100 de ergste pijn denkbaar is) | (0.00) 100 (100.00) |

## Vragenlijst PRIMA studie - AAS

1  
2  
3  
4  
5  
6  
7  
8  
9  
10  
11  
12  
13  
14  
15  
16  
17  
18  
19  
20  
21  
22  
23  
24  
25  
26  
27  
28  
29  
30  
31  
32  
33  
34  
35  
36  
37  
38  
39  
40  
41  
42  
43  
44  
45  
46  
47  
48  
49  
50  
51  
52  
53  
54  
55  
56  
57  
58  
59  
60

| Number | Question | Answers |
|--------|----------|---------|
|--------|----------|---------|

---

- 1  
2  
3  
4  
5  
6  
7  
8  
9  
10  
11  
12  
13  
14  
15  
16  
17  
18  
19  
20  
21  
22  
23  
24  
25  
26  
27  
28  
29  
30  
31  
32  
33  
34  
35  
36  
37  
38  
39  
40  
41  
42  
43  
44  
45  
46  
47  
48  
49  
50  
51  
52  
53  
54  
55  
56  
57  
58  
59  
60
- 4.1 Wat is het meest bij u van toepassing ten aanzien van uw acitiviteit?
- American Football
  - Basketbal
  - Gymnastiek/turnen
  - Handbal
  - Rugby
  - Voetbal
  - Hockey
  - Korfbal
  - Gevechtssporten: judo, karate, kung fu, taekwando, jiu jitsu, etc.
  - Oriëntatiewandelen
  - Rhythmische gymnastiek
  - Volleybal
  - Boxen
  - Freestyle snowboarden
  - IJshockey
  - Tennis
  - Worstelen
  - Fitness, aerobics
  - Badminton
  - Baseball
  - Cross-country hardlopen
  - Moderne pentathlon
  - Squash
  - Surfen, windsurfen
  - Tafel tennis
  - Atletiek: spring-, werponderdelen
  - Waterskiën
  - Dans
  - Schermen
  - Zaalhockey
  - Bergbeklimmen
  - Langlauf
  - Parachute springen
  - Softball
  - Speciale beroepen en werkactiviteiten; speciale beroepen: ballet, professioneel soldaat, speciale reddingswerker, stuntman, etc.
  - Duiken
  - Scubaduiken
  - Skaten, in-line skaten
  - Atletiek: looponderdelen
  - Triatlon
  - Gewichtsheffen, body-building

1  
2  
3  
4  
5  
6  
7  
8  
9  
10  
11  
12  
13  
14  
15  
16  
17  
18  
19  
20  
21  
22  
23  
24  
25  
26  
27  
28  
29  
30  
31  
32  
33  
34  
35  
36  
37  
38  
39  
40  
41  
42  
43  
44  
45  
46  
47  
48  
49  
50  
51  
52  
53  
54  
55  
56  
57  
58  
59  
60

- Alle competitieve sporten hieronder met 'seasonal' conditioning
- Zwaar fysiek werk
- Alpine skiën en snowboarden
- Bowlen/curlen
- Golf
- Mountainbike/BMX
- Powerliften
- Zeilen
- Fysiek werk
- Wielrennen
- Paardrijden
- Motorsporten/technische sporten
- Roeien, kayakken
- Boogschieten
- Water polo en zwemmen
- Kunnen lopen op oneven grond
- Geen sport, echter geen limitatie in dagelijkse activiteiten
- Kunnen lopen op even grond, maar de dagelijkse activiteiten zijn gelimiteerd
- Niet kunnen lopen, fysieke handicap wegens enkelproblemen

|       |                                                                                                                                                                    |                                                                                                              |
|-------|--------------------------------------------------------------------------------------------------------------------------------------------------------------------|--------------------------------------------------------------------------------------------------------------|
| 4.1.1 | <b><i>If 'Wat is het meest bij u van toepassing ten aanzien van uw acitviteit?' is equal to 'American Football' answer this question:</i></b><br>American Football | <input type="radio"/> Professioneel<br><input type="radio"/> Competitief<br><input type="radio"/> Recreatief |
| 4.1.2 | <b><i>If 'Wat is het meest bij u van toepassing ten aanzien van uw acitviteit?' is equal to 'Basketbal' answer this question:</i></b><br>Basketbal                 | <input type="radio"/> Professioneel<br><input type="radio"/> Competitief<br><input type="radio"/> Recreatief |
| 4.1.3 | <b><i>If 'Wat is het meest bij u van toepassing ten aanzien van uw acitviteit?' is equal to 'Gymnastiek/turnen' answer this question:</i></b><br>Gymnastiek/turnen | <input type="radio"/> Professioneel<br><input type="radio"/> Competitief<br><input type="radio"/> Recreatief |
| 4.1.4 | <b><i>If 'Wat is het meest bij u van toepassing ten aanzien van uw acitviteit?' is equal to 'Handbal' answer this question:</i></b><br>Handbal                     | <input type="radio"/> Professioneel<br><input type="radio"/> Competitief<br><input type="radio"/> Recreatief |
| 4.1.5 | <b><i>If 'Wat is het meest bij u van toepassing ten aanzien van uw acitviteit?' is equal to 'Rugby' answer this question:</i></b><br>Rugby                         | <input type="radio"/> Professioneel<br><input type="radio"/> Competitief<br><input type="radio"/> Recreatief |

|    |        |                                                                                                                                                                                          |                                     |
|----|--------|------------------------------------------------------------------------------------------------------------------------------------------------------------------------------------------|-------------------------------------|
| 1  |        |                                                                                                                                                                                          |                                     |
| 2  | 4.1.6  | <b>If 'Wat is het meest bij u van toepassing ten aanzien van uw acitiviteit?' is equal to 'Voetbal' answer this question:</b>                                                            | <input type="radio"/> Professioneel |
| 3  |        |                                                                                                                                                                                          | <input type="radio"/> Competitief   |
| 4  |        |                                                                                                                                                                                          | <input type="radio"/> Recreatief    |
| 5  |        | Voetbal                                                                                                                                                                                  |                                     |
| 6  |        |                                                                                                                                                                                          |                                     |
| 7  |        |                                                                                                                                                                                          |                                     |
| 8  | 4.1.7  | <b>If 'Wat is het meest bij u van toepassing ten aanzien van uw acitiviteit?' is equal to 'Hockey' answer this question:</b>                                                             | <input type="radio"/> Professioneel |
| 9  |        |                                                                                                                                                                                          | <input type="radio"/> Competitief   |
| 10 |        |                                                                                                                                                                                          | <input type="radio"/> Recreatief    |
| 11 |        | Hockey                                                                                                                                                                                   |                                     |
| 12 |        |                                                                                                                                                                                          |                                     |
| 13 |        |                                                                                                                                                                                          |                                     |
| 14 | 4.1.8  | <b>If 'Wat is het meest bij u van toepassing ten aanzien van uw acitiviteit?' is equal to 'Korfbal' answer this question:</b>                                                            | <input type="radio"/> Professioneel |
| 15 |        |                                                                                                                                                                                          | <input type="radio"/> Competitief   |
| 16 |        |                                                                                                                                                                                          | <input type="radio"/> Recreatief    |
| 17 |        | Korfbal                                                                                                                                                                                  |                                     |
| 18 |        |                                                                                                                                                                                          |                                     |
| 19 |        |                                                                                                                                                                                          |                                     |
| 20 | 4.1.9  | <b>If 'Wat is het meest bij u van toepassing ten aanzien van uw acitiviteit?' is equal to 'Gevechtssporten: judo, karate, kung fu, taekwando, jiu jitsu, etc.' answer this question:</b> | <input type="radio"/> Professioneel |
| 21 |        |                                                                                                                                                                                          | <input type="radio"/> Competitief   |
| 22 |        |                                                                                                                                                                                          | <input type="radio"/> Recreatief    |
| 23 |        | Gevechtssporten: judo, karate, kung fu, taekwando, jiu                                                                                                                                   |                                     |
| 24 |        | jitsu, etc.                                                                                                                                                                              |                                     |
| 25 |        |                                                                                                                                                                                          |                                     |
| 26 |        |                                                                                                                                                                                          |                                     |
| 27 | 4.1.10 | <b>If 'Wat is het meest bij u van toepassing ten aanzien van uw acitiviteit?' is equal to 'Oriëntatielopen' answer this question:</b>                                                    | <input type="radio"/> Professioneel |
| 28 |        |                                                                                                                                                                                          | <input type="radio"/> Competitief   |
| 29 |        |                                                                                                                                                                                          | <input type="radio"/> Recreatief    |
| 30 |        | Oriëntatielopen                                                                                                                                                                          |                                     |
| 31 |        |                                                                                                                                                                                          |                                     |
| 32 |        |                                                                                                                                                                                          |                                     |
| 33 | 4.1.11 | <b>If 'Wat is het meest bij u van toepassing ten aanzien van uw acitiviteit?' is equal to 'Rhythmische gymnastiek' answer this question:</b>                                             | <input type="radio"/> Professioneel |
| 34 |        |                                                                                                                                                                                          | <input type="radio"/> Competitief   |
| 35 |        |                                                                                                                                                                                          | <input type="radio"/> Recreatief    |
| 36 |        | Rhythmisch gymnastiek                                                                                                                                                                    |                                     |
| 37 |        |                                                                                                                                                                                          |                                     |
| 38 |        |                                                                                                                                                                                          |                                     |
| 39 | 4.1.12 | <b>If 'Wat is het meest bij u van toepassing ten aanzien van uw acitiviteit?' is equal to 'Volleybal' answer this question:</b>                                                          | <input type="radio"/> Professioneel |
| 40 |        |                                                                                                                                                                                          | <input type="radio"/> Competitief   |
| 41 |        |                                                                                                                                                                                          | <input type="radio"/> Recreatief    |
| 42 |        | Volleybal                                                                                                                                                                                |                                     |
| 43 |        |                                                                                                                                                                                          |                                     |
| 44 | 4.1.13 | <b>If 'Wat is het meest bij u van toepassing ten aanzien van uw acitiviteit?' is equal to 'Boxen' answer this question:</b>                                                              | <input type="radio"/> Professioneel |
| 45 |        |                                                                                                                                                                                          | <input type="radio"/> Competitief   |
| 46 |        |                                                                                                                                                                                          | <input type="radio"/> Recreatief    |
| 47 |        | Boxen                                                                                                                                                                                    |                                     |
| 48 |        |                                                                                                                                                                                          |                                     |
| 49 |        |                                                                                                                                                                                          |                                     |
| 50 | 4.1.14 | <b>If 'Wat is het meest bij u van toepassing ten aanzien van uw acitiviteit?' is equal to 'Freestyle snowboarden' answer this question:</b>                                              | <input type="radio"/> Professioneel |
| 51 |        |                                                                                                                                                                                          | <input type="radio"/> Competitief   |
| 52 |        |                                                                                                                                                                                          | <input type="radio"/> Recreatief    |
| 53 |        | Freestyle snowboarden                                                                                                                                                                    |                                     |
| 54 |        |                                                                                                                                                                                          |                                     |
| 55 |        |                                                                                                                                                                                          |                                     |
| 56 | 4.1.15 | <b>If 'Wat is het meest bij u van toepassing ten aanzien van uw acitiviteit?' is equal to 'Freestyle snowboarden' answer this question:</b>                                              | <input type="radio"/> Professioneel |
| 57 |        |                                                                                                                                                                                          | <input type="radio"/> Competitief   |
| 58 |        |                                                                                                                                                                                          | <input type="radio"/> Recreatief    |
| 59 |        | IJshockey                                                                                                                                                                                |                                     |
| 60 |        |                                                                                                                                                                                          |                                     |

- 1  
2  
3  
4  
5  
6  
7
- 
- 4.1.16 ***If 'Wat is het meest bij u van toepassing ten aanzien van uw acitiviteit?' is equal to 'Tennis' answer this question:***  
Tennis  Professioneel  
 Competitief  
 Recreatief
- 
- 8  
9  
10  
11  
12
- 4.1.17 ***If 'Wat is het meest bij u van toepassing ten aanzien van uw acitiviteit?' is equal to 'Worstelen' answer this question:***  
Worstelen  Professioneel  
 Competitief  
 Recreatief
- 
- 13  
14  
15  
16  
17  
18
- 4.1.18 ***If 'Wat is het meest bij u van toepassing ten aanzien van uw acitiviteit?' is equal to 'Fitness, aerobics' answer this question:***  
Fitness, aerobics  Professioneel  
 Competitief  
 Recreatief
- 
- 19  
20  
21  
22  
23  
24
- 4.1.19 ***If 'Wat is het meest bij u van toepassing ten aanzien van uw acitiviteit?' is equal to 'Badminton' answer this question:***  
Badminton  Professioneel  
 Competitief  
 Recreatief
- 
- 25  
26  
27  
28  
29  
30
- 4.1.20 ***If 'Wat is het meest bij u van toepassing ten aanzien van uw acitiviteit?' is equal to 'Baseball' answer this question:***  
Baseball  Professioneel  
 Competitief  
 Recreatief
- 
- 31  
32  
33  
34  
35
- 4.1.21 ***If 'Wat is het meest bij u van toepassing ten aanzien van uw acitiviteit?' is equal to 'Cross-country hardlopen' answer this question:***  
Cross-country hardlopen  Professioneel  
 Competitief  
 Recreatief
- 
- 36  
37  
38  
39  
40  
41
- 4.1.22 ***If 'Wat is het meest bij u van toepassing ten aanzien van uw acitiviteit?' is equal to 'Moderne pentathlon' answer this question:***  
Moderne pentathlon  Professioneel  
 Competitief  
 Recreatief
- 
- 42  
43  
44  
45  
46  
47
- 4.1.23 ***If 'Wat is het meest bij u van toepassing ten aanzien van uw acitiviteit?' is equal to 'Squash' answer this question:***  
Squash  Professioneel  
 Competitief  
 Recreatief
- 
- 48  
49  
50  
51  
52  
53
- 4.1.24 ***If 'Wat is het meest bij u van toepassing ten aanzien van uw acitiviteit?' is equal to 'Surfen, windsurfen' answer this question:***  
Surfen, windsurfen  Professioneel  
 Competitief  
 Recreatief
- 
- 54  
55  
56  
57  
58  
59  
60
- 4.1.25 ***If 'Wat is het meest bij u van toepassing ten aanzien van uw acitiviteit?' is equal to 'Tafel tennis' answer this question:***  
Tafel tennis  Professioneel  
 Competitief  
 Recreatief

- 1  
2  
3  
4  
5  
6  
7
- 4.1.26 **If 'Wat is het meest bij u van toepassing ten aanzien van uw acitiviteit?' is equal to 'Atletiek: spring-, werponderdelen' answer this question:**  
Atletiek: spring-, werponderdelen
- Professioneel  
 Competitief  
 Recreatief
- 
- 8  
9  
10  
11  
12
- 4.1.27 **If 'Wat is het meest bij u van toepassing ten aanzien van uw acitiviteit?' is equal to 'Waterskieën' answer this question:**  
Waterskien
- Professioneel  
 Competitief  
 Recreatief
- 
- 13  
14  
15  
16  
17  
18
- 4.1.28 **If 'Wat is het meest bij u van toepassing ten aanzien van uw acitiviteit?' is equal to 'Dans' answer this question:**  
Dans
- Professioneel  
 Competitief  
 Recreatief
- 
- 19  
20  
21  
22  
23  
24
- 4.1.29 **If 'Wat is het meest bij u van toepassing ten aanzien van uw acitiviteit?' is equal to 'Schermen' answer this question:**  
Schermen
- Professioneel  
 Competitief  
 Recreatief
- 
- 25  
26  
27  
28  
29  
30
- 4.1.30 **If 'Wat is het meest bij u van toepassing ten aanzien van uw acitiviteit?' is equal to 'Zaalhockey' answer this question:**  
Zaalhockey
- Professioneel  
 Competitief  
 Recreatief
- 
- 31  
32  
33  
34  
35
- 4.1.31 **If 'Wat is het meest bij u van toepassing ten aanzien van uw acitiviteit?' is equal to 'Bergbeklimmen' answer this question:**  
Bergbeklimmen
- Professioneel  
 Competitief  
 Recreatief
- 
- 36  
37  
38  
39  
40  
41
- 4.1.32 **If 'Wat is het meest bij u van toepassing ten aanzien van uw acitiviteit?' is equal to 'Langlauf' answer this question:**  
Langlauf
- Professioneel  
 Competitief  
 Recreatief
- 
- 42  
43  
44  
45  
46  
47
- 4.1.33 **If 'Wat is het meest bij u van toepassing ten aanzien van uw acitiviteit?' is equal to 'Parachute springen' answer this question:**  
Parachute springen
- Professioneel  
 Competitief  
 Recreatief
- 
- 48  
49  
50  
51  
52  
53  
54  
55  
56  
57  
58  
59  
60
- 4.1.34 **If 'Wat is het meest bij u van toepassing ten aanzien van uw acitiviteit?' is equal to 'Softball' answer this question:**  
Softball
- Professioneel  
 Competitief  
 Recreatief



- 1  
2  
3  
4  
5  
6  
7  
8  
9  
10  
11  
12
- 4.1.35 ***If 'Wat is het meest bij u van toepassing ten aanzien van uw acitiviteit?' is equal to 'Speciale beroepen en werkactiviteiten; speciale beroepen: ballet, professioneel soldaat, speciale reddingswerker, stuntman, etc.' answer this question:***  
Speciale beroepen en werkactiviteiten speciale beroepen: ballet, professioneel soldaat, speciale reddingswerker, stuntman, etc.
- ballet, professioneel soldaat, speciale reddingswerker, stuntman, etc.
- 
- 13  
14  
15  
16  
17
- 4.1.36 ***If 'Wat is het meest bij u van toepassing ten aanzien van uw acitiviteit?' is equal to 'Duiken' answer this question:***  
Duiken
- Professioneel/competitief  
 Recreatief
- 
- 18  
19  
20  
21  
22
- 4.1.37 ***If 'Wat is het meest bij u van toepassing ten aanzien van uw acitiviteit?' is equal to 'Scubaduiken' answer this question:***  
Scubaduiken
- Professioneel/competitief  
 Recreatief
- 
- 23  
24  
25  
26  
27  
28
- 4.1.38 ***If 'Wat is het meest bij u van toepassing ten aanzien van uw acitiviteit?' is equal to 'Skaten, in-line skaten' answer this question:***  
skaten, in-linen skaten
- Professioneel/competitief  
 Recreatief
- 
- 29  
30  
31  
32  
33
- 4.1.39 ***If 'Wat is het meest bij u van toepassing ten aanzien van uw acitiviteit?' is equal to 'Atletiek: looponderdelen' answer this question:***  
Atletiek: looponderdelen
- Professioneel/competitief  
 Recreatief
- 
- 34  
35  
36  
37  
38
- 4.1.40 ***If 'Wat is het meest bij u van toepassing ten aanzien van uw acitiviteit?' is equal to 'Triatlon' answer this question:***  
triatlon
- Professioneel/competitief  
 Recreatief
- 
- 39  
40  
41  
42  
43  
44  
45
- 4.1.41 ***If 'Wat is het meest bij u van toepassing ten aanzien van uw acitiviteit?' is equal to 'Gewichtsheffen, body-building' answer this question:***  
Gewichtsheffen, body-building
- Professioneel/competitief  
 Recreatief
- 
- 46  
47  
48  
49  
50  
51  
52
- 4.1.42 ***If 'Wat is het meest bij u van toepassing ten aanzien van uw acitiviteit?' is equal to 'Alle competitieve sporten hieronder met 'seasonal' conditioning' answer this question:***  
Alle competitieve sporten hieronder met 'seasonal' conditioning
- Alle competitieve sporten hieronder met 'seasonal' conditioning
- 
- 53  
54  
55  
56  
57  
58  
59  
60
- 4.1.43 ***If 'Wat is het meest bij u van toepassing ten aanzien van uw acitiviteit?' is equal to 'Zwaar fysiek werk' answer this question:***  
Zwaar fysiek werk
- Alle competitieve sporten hieronder met 'seasonal' conditioning

- 1  
2  
3  
4  
5  
6  
7  
8  
9  
10  
11  
12  
13  
14  
15  
16  
17  
18  
19  
20  
21  
22  
23  
24  
25  
26  
27  
28  
29  
30  
31  
32  
33  
34  
35  
36  
37  
38  
39  
40  
41  
42  
43  
44  
45  
46  
47  
48  
49  
50  
51  
52  
53  
54  
55  
56  
57  
58  
59  
60
- 
- 4.1.44 ***If 'Wat is het meest bij u van toepassing ten aanzien van uw acitiviteit?' is equal to 'Alpine skiën en snowboarden' answer this question:***  
Alpine skien en snowboarden  Alpine skien en snowboarden
- 
- 4.1.45 ***If 'Wat is het meest bij u van toepassing ten aanzien van uw acitiviteit?' is equal to 'Bowlen/curlen' answer this question:***  
Bowlen/curlen  Bowlen/curlen
- 
- 4.1.46 ***If 'Wat is het meest bij u van toepassing ten aanzien van uw acitiviteit?' is equal to 'Golf' answer this question:***  
Golf  Golf
- 
- 4.1.47 ***If 'Wat is het meest bij u van toepassing ten aanzien van uw acitiviteit?' is equal to 'Mountainbike/BMX' answer this question:***  
Mountainbike/BMX  Mountainbike/BMX
- 
- 4.1.48 ***If 'Wat is het meest bij u van toepassing ten aanzien van uw acitiviteit?' is equal to 'Powerliften' answer this question:***  
Powerliften  Powerliften
- 
- 4.1.49 ***If 'Wat is het meest bij u van toepassing ten aanzien van uw acitiviteit?' is equal to 'Zeilen' answer this question:***  
Zeilen  Zeilen
- 
- 4.1.50 ***If 'Wat is het meest bij u van toepassing ten aanzien van uw acitiviteit?' is equal to 'Fysiek werk' answer this question:***  
Fysiek werk  Fysiek werk
- 
- 4.1.51 ***If 'Wat is het meest bij u van toepassing ten aanzien van uw acitiviteit?' is equal to 'Wielrennen' answer this question:***  
Wielrennen  Wielrennen
- 
- 4.1.52 ***If 'Wat is het meest bij u van toepassing ten aanzien van uw acitiviteit?' is equal to 'Paardrijden' answer this question:***  
Paardrijden  Paardrijden
- 
- 4.1.53 ***If 'Wat is het meest bij u van toepassing ten aanzien van uw acitiviteit?' is equal to 'Motorsporten/technische sporten' answer this question:***  
Motorsporten/technische sporten  Motorsporten/technische sporten
- 
- 4.1.54 ***If 'Wat is het meest bij u van toepassing ten aanzien van uw acitiviteit?' is equal to 'Roeien, kayakken' answer this question:***  
Roeien, kayakken  Roeien, kayakken

|        |                                                                                                                                                                                                                                                                                    |                                                                                                    |
|--------|------------------------------------------------------------------------------------------------------------------------------------------------------------------------------------------------------------------------------------------------------------------------------------|----------------------------------------------------------------------------------------------------|
| 4.1.55 | <b>If 'Wat is het meest bij u van toepassing ten aanzien van uw acitiviteit?' is equal to 'Boogschieten' answer this question:</b><br>Boogschieten                                                                                                                                 | <input type="radio"/> Boogschieten                                                                 |
| 4.1.56 | <b>If 'Wat is het meest bij u van toepassing ten aanzien van uw acitiviteit?' is equal to 'Water polo en zwemmen' answer this question:</b><br>Water polo en zwemmen                                                                                                               | <input type="radio"/> Water polo en zwemmen                                                        |
| 4.1.57 | <b>If 'Wat is het meest bij u van toepassing ten aanzien van uw acitiviteit?' is equal to 'Kunnen lopen op oneven grond' answer this question:</b><br>Kunnen lopen op oneven grond                                                                                                 | <input type="radio"/> Kunnen lopen op oneven grond                                                 |
| 4.1.58 | <b>If 'Wat is het meest bij u van toepassing ten aanzien van uw acitiviteit?' is equal to 'Geen sport, echter geen limitatie in dagelijkse activiteiten' answer this question:</b><br>Geen sport, echter geen limitatie in dagelijkse activiteiten                                 | <input type="radio"/> Geen sport, echter geen limitatie in dagelijkse activiteiten                 |
| 4.1.59 | <b>If 'Wat is het meest bij u van toepassing ten aanzien van uw acitiviteit?' is equal to 'Kunnen lopen op even grond, maar de dagelijkse activiteiten zijn gelimiteerd' answer this question:</b><br>Kunnen lopen op even grond, maar de dagelijkse activiteiten zijn gelimiteerd | <input type="radio"/> Kunnen lopen op even grond, maar de dagelijkse activiteiten zijn gelimiteerd |
| 4.1.60 | <b>If 'Wat is het meest bij u van toepassing ten aanzien van uw acitiviteit?' is equal to 'Niet kunnen lopen, fysieke handicap wegens enkelproblemen' answer this question:</b><br>Niet kunnen lopen, fysieke handicap wegens enkelproblemen                                       | <input type="radio"/> Niet kunnen lopen, fysieke handicap wegens enkelproblemen                    |

## Vragenlijst PRIMA studie - Hoe tevreden bent u over de enkelklachten?

| Number | Question                                   | Answers                                                                                                                       |
|--------|--------------------------------------------|-------------------------------------------------------------------------------------------------------------------------------|
| 5.1    | Hoe tevreden bent u over de enkelklachten? | <input type="radio"/> Slecht<br><input type="radio"/> Matig<br><input type="radio"/> Goed<br><input type="radio"/> Uitstekend |

## Vragenlijst PRIMA studie - SF-36

| Number | Question                                                                                                                                                                                                                                                                                                                                                           | Answers                                                                                                                                                                                                                                                                                      |
|--------|--------------------------------------------------------------------------------------------------------------------------------------------------------------------------------------------------------------------------------------------------------------------------------------------------------------------------------------------------------------------|----------------------------------------------------------------------------------------------------------------------------------------------------------------------------------------------------------------------------------------------------------------------------------------------|
|        | Deze vragenlijst gaat over uw standpunten t.a.v. uw gezondheid. Met behulp van deze gegevens kan worden bijgehouden hoe u zich voelt en hoe goed u in staat bent uw gebruikelijke bezigheden uit te voeren. Beantwoord elke vraag door een antwoord aan te klikken. Als u niet zeker weet hoe u een vraag moet beantwoorden, geef dan het best mogelijke antwoord. |                                                                                                                                                                                                                                                                                              |
| 6.1    | Hoe zou u over het algemeen uw gezondheid noemen?                                                                                                                                                                                                                                                                                                                  | <input type="radio"/> Uitstekend <input type="radio"/> Zeer goed <input type="radio"/> Goed <input type="radio"/> Matig <input type="radio"/> Slecht                                                                                                                                         |
| 6.2    | Hoe beoordeelt u nu uw gezondheid over het algemeen vergeleken met een jaar geleden?                                                                                                                                                                                                                                                                               | <input type="radio"/> Veel beter dan een jaar geleden <input type="radio"/> Wat beter dan een jaar geleden <input type="radio"/> Ongeveer hetzelfde als een jaar geleden<br><input type="radio"/> Wat slechter dan een jaar geleden <input type="radio"/> Veel slechter dan een jaar geleden |
| 6.3    | Wordt u door uw gezondheid op dit moment beperkt bij forse inspanning, zoals hardlopen, tillen van zware voorwerpen of een veeleisende sport beoefenen?                                                                                                                                                                                                            | <input type="radio"/> Ja, ernstig beperkt <input type="radio"/> Ja, een beetje beperkt <input type="radio"/> Nee, helemaal niet beperkt                                                                                                                                                      |
| 6.4    | Wordt u door uw gezondheid op dit moment beperkt bij matige inspanning zoals een tafel verplaatsen, stofzuigen, zwemmen of fietsen?                                                                                                                                                                                                                                | <input type="radio"/> Ja, ernstig beperkt <input type="radio"/> Ja, een beetje beperkt <input type="radio"/> Nee, helemaal niet beperkt                                                                                                                                                      |
| 6.5    | Wordt u door uw gezondheid op dit moment beperkt bij boodschappen tillen of dragen?                                                                                                                                                                                                                                                                                | <input type="radio"/> Ja, ernstig beperkt <input type="radio"/> Ja, een beetje beperkt <input type="radio"/> Nee, helemaal niet beperkt                                                                                                                                                      |
| 6.6    | Wordt u door uw gezondheid op dit moment beperkt bij een paar trappen oplopen?                                                                                                                                                                                                                                                                                     | <input type="radio"/> Ja, ernstig beperkt <input type="radio"/> Ja, een beetje beperkt <input type="radio"/> Nee, helemaal niet beperkt                                                                                                                                                      |
| 6.7    | Wordt u door uw gezondheid op dit moment beperkt bij één trap oplopen?                                                                                                                                                                                                                                                                                             | <input type="radio"/> Ja, ernstig beperkt <input type="radio"/> Ja, een beetje beperkt <input type="radio"/> Nee, helemaal niet beperkt                                                                                                                                                      |
| 6.8    | Wordt u door uw gezondheid op dit moment beperkt bij bukken, knielen of hurken?                                                                                                                                                                                                                                                                                    | <input type="radio"/> Ja, ernstig beperkt <input type="radio"/> Ja, een beetje beperkt <input type="radio"/> Nee, helemaal niet beperkt                                                                                                                                                      |
| 6.9    | Wordt u door uw gezondheid op dit moment beperkt bij meer dan één kilometer lopen?                                                                                                                                                                                                                                                                                 | <input type="radio"/> Ja, ernstig beperkt <input type="radio"/> Ja, een beetje beperkt <input type="radio"/> Nee, helemaal niet beperkt                                                                                                                                                      |
| 6.10   | Wordt u door uw gezondheid op dit moment beperkt bij een paar honderd meter lopen?                                                                                                                                                                                                                                                                                 | <input type="radio"/> Ja, ernstig beperkt <input type="radio"/> Ja, een beetje beperkt <input type="radio"/> Nee, helemaal niet beperkt                                                                                                                                                      |

- 1  
2  
3  
4  
5  
6  
7  
8  
9  
10  
11  
12  
13  
14  
15  
16  
17  
18  
19  
20  
21  
22  
23  
24  
25  
26  
27  
28  
29  
30  
31  
32  
33  
34  
35  
36  
37  
38  
39  
40  
41  
42  
43  
44  
45  
46  
47  
48  
49  
50  
51  
52  
53  
54  
55  
56  
57  
58  
59  
60
- 
- 6.11 Wordt u door uw gezondheid op dit moment beperkt bij ongeveer honderd meter lopen?  Ja, ernstig beperkt  Ja, een beetje beperkt  Nee, helemaal niet beperkt
- 
- 6.12 Wordt u door uw gezondheid op dit moment beperkt bij uzelf wassen of aankleden?  Ja, ernstig beperkt  Ja, een beetje beperkt  Nee, helemaal niet beperkt
- 
- 6.13 U besteedde in de afgelopen 4 weken minder tijd aan werk of andere bezigheden  Ja  Nee
- 
- 6.14 U heeft in de afgelopen 4 weken minder bereikt dan u zou willen  Ja  Nee
- 
- 6.15 U was in de afgelopen 4 weken beperkt in het soort werk of andere bezigheden.  Ja  Nee
- 
- 6.16 U had de afgelopen 4 weken moeite om uw werk of andere bezigheden uit te voeren (het kostte u bijvoorbeeld extra inspanning).  Ja  Nee
- 
- 6.17 U besteedde in de afgelopen 4 weken minder tijd aan werk of andere bezigheden ten gevolge van emotionele problemen  Ja  Nee
- 
- 6.18 U heeft in de afgelopen 4 weken minder bereikt dan u zou willen ten gevolge van emotionele problemen.  Ja  Nee
- 
- 6.19 U deed de afgelopen 4 weken uw werk of andere bezigheden niet zo zorgvuldig als gewoonlijk ten gevolge van emotionele problemen.  Ja  Nee
- 
- 6.20 In hoeverre hebben uw lichamelijke gezondheid of emotionele problemen u gedurende de afgelopen 4 weken gehinderd in uw normale omgang met familie, vrienden of burens, of bij activiteiten in groepsverband?  Helemaal niet  Enigszins  Nogal  Veel  Heel erg veel
- 
- 6.21 Hoeveel lichamelijke pijn heeft u de afgelopen 4 weken gehad?  Geen  Heel licht  Licht  Nogal  Ernstig  Heel ernstig
- 
- 6.22 In welke mate bent u de afgelopen 4 weken door de pijn gehinderd in uw normale werk (zowel werk buitenshuis als huishoudelijk werk)?  Helemaal niet  Een klein beetje  Nogal  Veel  Heel erg veel

1  
2 6.23 Voelde u zich levenslustig?  Altijd  
3  Meestal  
4  Vaak  
5  Soms  
6  Zelden  
7  Nooit

11 6.24 Was u erg zenuwachtig?  Altijd  
12  Meestal  
13  Vaak  
14  Soms  
15  Zelden  
16  Nooit

21 6.25 Zat u zo in de put dat u niets kon?  Altijd  
22  Meestal  
23  Vaak  
24  Soms  
25  Zelden  
26  Nooit

31 6.26 Voelde u zich rustig en tevreden?  Altijd  
32  Meestal  
33  Vaak  
34  Soms  
35  Zelden  
36  Nooit

41 6.27 Had u veel energie?  Altijd  
42  Meestal  
43  Vaak  
44  Soms  
45  Zelden  
46  Nooit

51 6.28 Voelde u zich somber en neerslachtig?  Altijd  
52  Meestal  
53  Vaak  
54  Soms  
55  Zelden  
56  Nooit

1  
2  
3  
4  
5  
6  
7  
8  
9  
10  
11  
12  
13  
14  
15  
16  
17  
18  
19  
20  
21  
22  
23  
24  
25  
26  
27  
28  
29  
30  
31  
32  
33  
34  
35  
36  
37  
38  
39  
40  
41  
42  
43  
44  
45  
46  
47  
48  
49  
50  
51  
52  
53  
54  
55  
56  
57  
58  
59  
60

---

|      |                         |                               |
|------|-------------------------|-------------------------------|
| 6.29 | Voelde u zich uitgeput? | <input type="radio"/> Altijd  |
|      |                         | <input type="radio"/> Meestal |
|      |                         | <input type="radio"/> Vaak    |
|      |                         | <input type="radio"/> Soms    |
|      |                         | <input type="radio"/> Zelden  |
|      |                         | <input type="radio"/> Nooit   |

---

|      |                          |                               |
|------|--------------------------|-------------------------------|
| 6.30 | Was u een gelukkig mens? | <input type="radio"/> Altijd  |
|      |                          | <input type="radio"/> Meestal |
|      |                          | <input type="radio"/> Vaak    |
|      |                          | <input type="radio"/> Soms    |
|      |                          | <input type="radio"/> Zelden  |
|      |                          | <input type="radio"/> Nooit   |

---

|      |                    |                               |
|------|--------------------|-------------------------------|
| 6.31 | Voelde u zich moe? | <input type="radio"/> Altijd  |
|      |                    | <input type="radio"/> Meestal |
|      |                    | <input type="radio"/> Vaak    |
|      |                    | <input type="radio"/> Soms    |
|      |                    | <input type="radio"/> Zelden  |
|      |                    | <input type="radio"/> Nooit   |

---

|      |                                                                                                                                                                                      |                               |
|------|--------------------------------------------------------------------------------------------------------------------------------------------------------------------------------------|-------------------------------|
| 6.32 | Hoe vaak hebben uw lichamelijke gezondheid of emotionele problemen u gedurende de afgelopen 4 weken gehinderd bij uw sociale activiteiten (zoals vrienden of familie bezoeken etc.)? | <input type="radio"/> Altijd  |
|      |                                                                                                                                                                                      | <input type="radio"/> Meestal |
|      |                                                                                                                                                                                      | <input type="radio"/> Soms    |
|      |                                                                                                                                                                                      | <input type="radio"/> Zelden  |
|      |                                                                                                                                                                                      | <input type="radio"/> Nooit   |

---

|      |                                                            |                                           |
|------|------------------------------------------------------------|-------------------------------------------|
| 6.33 | Ik lijk wat gemakkelijker ziek te worden dan andere mensen | <input type="radio"/> Volkomen juist      |
|      |                                                            | <input type="radio"/> Grotendeels juist   |
|      |                                                            | <input type="radio"/> Weet ik niet        |
|      |                                                            | <input type="radio"/> Grotendeels onjuist |
|      |                                                            | <input type="radio"/> Volkomen onjuist    |

---

|      |                                                 |                                           |
|------|-------------------------------------------------|-------------------------------------------|
| 6.34 | Ik ben even gezond als andere mensen die ik ken | <input type="radio"/> Volkomen juist      |
|      |                                                 | <input type="radio"/> Grotendeels juist   |
|      |                                                 | <input type="radio"/> Weet ik niet        |
|      |                                                 | <input type="radio"/> Grotendeels onjuist |
|      |                                                 | <input type="radio"/> Volkomen onjuist    |

1  
2  
3  
4  
5  
6  
7  
8  
9

---

6.35 Ik verwacht dat mijn gezondheid achteruit zal gaan

Volkomen juist

Grotendeels juist

Weet ik niet

Grotendeels onjuist

Volkomen onjuist

---

10  
11  
12  
13  
14  
15  
16  
17  
18  
19  
20  
21  
22

6.36 Mijn gezondheid is uitstekend

Volkomen juist

Grotendeels juist

Weet ik niet

Grotendeels onjuist

Volkomen onjuist

---

## Vragenlijst PRIMA studie - EQ-5D-3L

23  
24  
25  
26

| Number | Question | Answers |
|--------|----------|---------|
|--------|----------|---------|

27  
28  
29  
30  
31  
32

Deze vragenlijst gaat over uw standpunten t.a.v. uw gezondheid. Met behulp van deze gegevens kan worden bijgehouden hoe u zich voelt en hoe goed u in staat bent uw gebruikelijke bezigheden uit te voeren. Beantwoord elke vraag door een antwoord aan te klikken. Als u niet zeker weet hoe u een vraag moet beantwoorden, geef dan het best mogelijke antwoord.

---

33  
34  
35  
36  
37  
38

7.1 Hoe is het met uw Mobiliteit gesteld?

Ik heb geen problemen met lopen

Ik heb enige problemen met lopen

Ik ben bedlegerig

---

39  
40  
41  
42  
43  
44  
45  
46  
47

7.2 Hoe is het met uw Zelfzorg gesteld?

Ik heb geen problemen om mijzelf te wassen of aan te kleden

Ik heb enige problemen om mijzelf te wassen of aan te kleden

Ik ben niet in staat om mijzelf te wassen of aan te kleden

---

48  
49  
50  
51  
52  
53  
54  
55  
56  
57  
58  
59  
60

7.3 Hoe is het met de Dagelijkse activiteiten (werk, studie, huishouden, gezins- en vrijetijdsactiviteiten) gesteld?

Ik heb geen problemen met mijn dagelijkse activiteiten

Ik heb enige problemen met mijn dagelijkse activiteiten

Ik ben niet in staat om mijn dagelijkse activiteiten uit te voeren



1  
2  
3  
4  
5  
6  
7

|     |                                          |                                                                                                                                                                                                |
|-----|------------------------------------------|------------------------------------------------------------------------------------------------------------------------------------------------------------------------------------------------|
| 7.4 | Hoe is het met de Pijn/klachten gesteld? | <input type="radio"/> Ik heb geen pijn of andere klachten<br><input type="radio"/> Ik heb matige pijn of andere klachten<br><input type="radio"/> Ik heb zeer ernstige pijn of andere klachten |
|-----|------------------------------------------|------------------------------------------------------------------------------------------------------------------------------------------------------------------------------------------------|

8  
9  
10  
11  
12  
13

|     |                                     |                                                                                                                                                                   |
|-----|-------------------------------------|-------------------------------------------------------------------------------------------------------------------------------------------------------------------|
| 7.5 | Hoe is het met de Stemming gesteld? | <input type="radio"/> Ik ben niet angstig of somber<br><input type="radio"/> Ik ben matig angstig of somber<br><input type="radio"/> Ik ben erg angstig of somber |
|-----|-------------------------------------|-------------------------------------------------------------------------------------------------------------------------------------------------------------------|

14  
15  
16  
17  
18

We willen weten hoe goed of slecht uw gezondheid VANDAAG is. Deze meetschaal loopt van 0 tot 100: 100 staat voor de BESTE gezondheid die u zich kunt voorstellen - 0 staat voor de SLECHTSTE gezondheid die u zich kunt voorstellen

19  
20  
21  
22  
23  
24

|     |                       |        |          |
|-----|-----------------------|--------|----------|
| 7.6 | Uw Gezondheid vandaag | (0.00) | (100.00) |
|-----|-----------------------|--------|----------|

## Vragenlijst PRIMA studie - AOS

25  
26  
27  
28  
29  
30  
31  
32  
33  
34  
35  
36  
37  
38  
39  
40  
41  
42  
43  
44  
45  
46  
47  
48  
49  
50  
51  
52  
53  
54  
55  
56  
57  
58  
59  
60

| Number                                                                                                                                                                                                                                                                                                                                                                                                        | Question                                                                                                                                                     | Answers                                                                                            |          |
|---------------------------------------------------------------------------------------------------------------------------------------------------------------------------------------------------------------------------------------------------------------------------------------------------------------------------------------------------------------------------------------------------------------|--------------------------------------------------------------------------------------------------------------------------------------------------------------|----------------------------------------------------------------------------------------------------|----------|
| Instructies: De lijn naast elke vraag staat voor hoeveel PIJN u heeft in verschillende situaties. De linker kant (0) is "geen pijn" en de rechter kant (100) is "ergste pijn denkbaar". Geef voor de onderstaande situaties op de lijn aan hoeveel PIJN u in de afgelopen week in de enkel had. Als een of meerdere van deze situaties niet van toepassing waren, dan kiest u de "niet van toepassing" optie. |                                                                                                                                                              |                                                                                                    |          |
| 8.1                                                                                                                                                                                                                                                                                                                                                                                                           | Wat was de hoogte van de ergste pijn in de afgelopen week?                                                                                                   | (0.00)                                                                                             | (100.00) |
| 8.2                                                                                                                                                                                                                                                                                                                                                                                                           | Heeft u pijn als u 's ochtends opstaat?                                                                                                                      | <input type="radio"/> Ja<br><input type="radio"/> Nee<br><input type="radio"/> Niet van toepassing |          |
| 8.2.1                                                                                                                                                                                                                                                                                                                                                                                                         | <b><i>If 'Heeft u pijn als u 's ochtends opstaat?' is equal to 'Ja' answer this question:</i></b><br>Hoeveel pijn heeft u voordat u 's ochtends opstaat?     | (0.00)                                                                                             | (100.00) |
| 8.3                                                                                                                                                                                                                                                                                                                                                                                                           | Heeft u pijn wanneer u op blote voeten loopt?                                                                                                                | <input type="radio"/> Ja<br><input type="radio"/> Nee<br><input type="radio"/> Niet van toepassing |          |
| 8.3.1                                                                                                                                                                                                                                                                                                                                                                                                         | <b><i>If 'Heeft u pijn wanneer u op blote voeten loopt?' is equal to 'Ja' answer this question:</i></b><br>Hoeveel pijn heeft u als u op blote voeten loopt? | (0.00)                                                                                             | (100.00) |

|    |       |                                                                                                              |                                           |
|----|-------|--------------------------------------------------------------------------------------------------------------|-------------------------------------------|
| 1  |       |                                                                                                              |                                           |
| 2  | 8.4   | Heeft u pijn wanneer u op blote voeten staat?                                                                | <input type="radio"/> Ja                  |
| 3  |       |                                                                                                              | <input type="radio"/> Nee                 |
| 4  |       |                                                                                                              | <input type="radio"/> Niet van toepassing |
| 5  |       |                                                                                                              |                                           |
| 6  |       |                                                                                                              |                                           |
| 7  |       |                                                                                                              |                                           |
| 8  | 8.4.1 | <b>If 'Heeft u pijn wanneer u op blote voeten staat?' is equal to 'Ja' answer this question:</b>             | (0.00) (100.00)                           |
| 9  |       | Hoeveel pijn heeft u als u op blote voeten staat?                                                            |                                           |
| 10 |       |                                                                                                              |                                           |
| 11 |       |                                                                                                              |                                           |
| 12 | 8.5   | Heeft u pijn wanneer u met schoenen loopt?                                                                   | <input type="radio"/> Ja                  |
| 13 |       |                                                                                                              | <input type="radio"/> Nee                 |
| 14 |       |                                                                                                              | <input type="radio"/> Niet van toepassing |
| 15 |       |                                                                                                              |                                           |
| 16 |       |                                                                                                              |                                           |
| 17 |       |                                                                                                              |                                           |
| 18 | 8.5.1 | <b>If 'Heeft u pijn wanneer u met schoenen loopt?' is equal to 'Ja' answer this question:</b>                | (0.00) (100.00)                           |
| 19 |       | Hoeveel pijn heeft u wanneer u met schoenen loopt?                                                           |                                           |
| 20 |       |                                                                                                              |                                           |
| 21 |       |                                                                                                              |                                           |
| 22 | 8.6   | Heeft u pijn wanneer u met schoenen staat?                                                                   | <input type="radio"/> Ja                  |
| 23 |       |                                                                                                              | <input type="radio"/> Nee                 |
| 24 |       |                                                                                                              | <input type="radio"/> Niet van toepassing |
| 25 |       |                                                                                                              |                                           |
| 26 |       |                                                                                                              |                                           |
| 27 |       |                                                                                                              |                                           |
| 28 | 8.6.1 | <b>If 'Heeft u pijn wanneer u met schoenen staat?' is equal to 'Ja' answer this question:</b>                | (0.00) (100.00)                           |
| 29 |       | Hoeveel pijn heeft u wanneer u met schoenen staat?                                                           |                                           |
| 30 |       |                                                                                                              |                                           |
| 31 |       |                                                                                                              |                                           |
| 32 | 8.7   | Heeft u pijn wanneer u loopt met steunzolen of een brace?                                                    | <input type="radio"/> Ja                  |
| 33 |       |                                                                                                              | <input type="radio"/> Nee                 |
| 34 |       |                                                                                                              | <input type="radio"/> Niet van toepassing |
| 35 |       |                                                                                                              |                                           |
| 36 |       |                                                                                                              |                                           |
| 37 |       |                                                                                                              |                                           |
| 38 | 8.7.1 | <b>If 'Heeft u pijn wanneer u loopt met steunzolen of een brace?' is equal to 'Ja' answer this question:</b> | (0.00) (100.00)                           |
| 39 |       | Hoeveel pijn heeft u wanneer u loopt met steunzolen of een brace?                                            |                                           |
| 40 |       |                                                                                                              |                                           |
| 41 |       |                                                                                                              |                                           |
| 42 |       |                                                                                                              |                                           |
| 43 | 8.8   | Heeft u pijn wanneer u staat met steunzolen of een brace?                                                    | <input type="radio"/> Ja                  |
| 44 |       |                                                                                                              | <input type="radio"/> Nee                 |
| 45 |       |                                                                                                              | <input type="radio"/> Niet van toepassing |
| 46 |       |                                                                                                              |                                           |
| 47 |       |                                                                                                              |                                           |
| 48 |       |                                                                                                              |                                           |
| 49 | 8.8.1 | <b>If 'Heeft u pijn wanneer u staat met steunzolen of een brace?' is equal to 'Ja' answer this question:</b> | (0.00) (100.00)                           |
| 50 |       | Hoeveel pijn heeft u wanneer u staat met steunzolen of een brace?                                            |                                           |
| 51 |       |                                                                                                              |                                           |
| 52 |       |                                                                                                              |                                           |
| 53 |       |                                                                                                              |                                           |
| 54 | 8.9   | Heeft u pijn aan het einde van de dag?                                                                       | <input type="radio"/> Ja                  |
| 55 |       |                                                                                                              | <input type="radio"/> Nee                 |
| 56 |       |                                                                                                              | <input type="radio"/> Niet van toepassing |
| 57 |       |                                                                                                              |                                           |
| 58 |       |                                                                                                              |                                           |
| 59 |       |                                                                                                              |                                           |
| 60 |       |                                                                                                              |                                           |

|    |        |                                                                                                              |                                           |
|----|--------|--------------------------------------------------------------------------------------------------------------|-------------------------------------------|
| 1  |        |                                                                                                              |                                           |
| 2  | 8.9.1  | <b>If 'Heeft u pijn aan het einde van de dag?' is equal to 'Ja' answer this question:</b>                    | (0.00) (100.00)                           |
| 3  |        | Hoeveel pijn heeft u aan het einde van de dag?                                                               |                                           |
| 4  |        |                                                                                                              |                                           |
| 5  |        |                                                                                                              |                                           |
| 6  |        | Instructies:De lijn naast elke vraag staat voor hoeveel MOEITE u heeft met verschillende activiteiten.       |                                           |
| 7  |        | De linker kant (0) is "Niet moeilijk" en de rechter kant (100) is "Te moeilijk, niet uitvoerbaar". Geef voor |                                           |
| 8  |        | de onderstaande activiteiten op de lijn aan hoeveel MOEITE u in de afgelopen week door                       |                                           |
| 9  |        | enkelklachten had met onderstaande activiteiten. Als een situatie niet van toepassing is, kies dan de        |                                           |
| 10 |        | optie "niet van toepassing".                                                                                 |                                           |
| 11 |        |                                                                                                              |                                           |
| 12 |        |                                                                                                              |                                           |
| 13 | 8.10   | Heeft u moeite met door het huis lopen?                                                                      | <input type="radio"/> Ja                  |
| 14 |        |                                                                                                              | <input type="radio"/> Nee                 |
| 15 |        |                                                                                                              | <input type="radio"/> Niet van toepassing |
| 16 |        |                                                                                                              |                                           |
| 17 |        |                                                                                                              |                                           |
| 18 | 8.10.1 | <b>If 'Heeft u moeite met door het huis lopen?' is equal to 'Ja' answer this question:</b>                   | (0.00) (100.00)                           |
| 19 |        | Hoeveel moeite heeft u met door het huis lopen?                                                              |                                           |
| 20 |        |                                                                                                              |                                           |
| 21 |        |                                                                                                              |                                           |
| 22 |        |                                                                                                              |                                           |
| 23 | 8.11   | Heeft u moeite met buiten lopen op oneven                                                                    | <input type="radio"/> Ja                  |
| 24 |        | ondergrond?                                                                                                  | <input type="radio"/> Nee                 |
| 25 |        |                                                                                                              | <input type="radio"/> Niet van toepassing |
| 26 |        |                                                                                                              |                                           |
| 27 |        |                                                                                                              |                                           |
| 28 | 8.11.1 | <b>If 'Heeft u moeite met buiten lopen op oneven</b>                                                         | (0.00) (100.00)                           |
| 29 |        | <b>ondergrond?' is equal to 'Ja' answer this question:</b>                                                   |                                           |
| 30 |        | Hoeveel moeite heeft u met buiten lopen op oneven                                                            |                                           |
| 31 |        | ondergrond?                                                                                                  |                                           |
| 32 |        |                                                                                                              |                                           |
| 33 |        |                                                                                                              |                                           |
| 34 | 8.12   | Heeft u moeite met een paar honderd meter lopen?                                                             | <input type="radio"/> Ja                  |
| 35 |        |                                                                                                              | <input type="radio"/> Nee                 |
| 36 |        |                                                                                                              | <input type="radio"/> Niet van toepassing |
| 37 |        |                                                                                                              |                                           |
| 38 |        |                                                                                                              |                                           |
| 39 | 8.12.1 | <b>If 'Heeft u moeite met een paar honderd meter</b>                                                         | (0.00) (100.00)                           |
| 40 |        | <b>lopen?' is equal to 'Ja' answer this question:</b>                                                        |                                           |
| 41 |        | Hoeveel moeite heeft u met een paar honderd meter                                                            |                                           |
| 42 |        | lopen?                                                                                                       |                                           |
| 43 |        |                                                                                                              |                                           |
| 44 |        |                                                                                                              |                                           |
| 45 | 8.13   | Heeft u moeite met een trap oplopen?                                                                         | <input type="radio"/> Ja                  |
| 46 |        |                                                                                                              | <input type="radio"/> Nee                 |
| 47 |        |                                                                                                              | <input type="radio"/> Niet van toepassing |
| 48 |        |                                                                                                              |                                           |
| 49 |        |                                                                                                              |                                           |
| 50 | 8.13.1 | <b>If 'Heeft u moeite met een trap oplopen?' is equal</b>                                                    | (0.00) (100.00)                           |
| 51 |        | <b>to 'Ja' answer this question:</b>                                                                         |                                           |
| 52 |        | Hoeveel moeite heeft u met een trap oplopen?                                                                 |                                           |
| 53 |        |                                                                                                              |                                           |
| 54 |        |                                                                                                              |                                           |
| 55 | 8.14   | Heeft u moeite met een trap aflopen?                                                                         | <input type="radio"/> Ja                  |
| 56 |        |                                                                                                              | <input type="radio"/> Nee                 |
| 57 |        |                                                                                                              | <input type="radio"/> Niet van toepassing |
| 58 |        |                                                                                                              |                                           |
| 59 |        |                                                                                                              |                                           |
| 60 |        |                                                                                                              |                                           |

|    |        |                                                                                                                    |                                           |          |
|----|--------|--------------------------------------------------------------------------------------------------------------------|-------------------------------------------|----------|
| 1  |        |                                                                                                                    |                                           |          |
| 2  | 8.14.1 | <b><i>If 'Heeft u moeite met een trap aflopen?' is equal to 'Ja' answer this question:</i></b>                     | (0.00)                                    | (100.00) |
| 3  |        | Hoeveel moeite heeft u met een trap aflopen?                                                                       |                                           |          |
| 4  |        |                                                                                                                    |                                           |          |
| 5  |        |                                                                                                                    |                                           |          |
| 6  | 8.15   | Heeft u moeite met op de tenen staan?                                                                              | <input type="radio"/> Ja                  |          |
| 7  |        |                                                                                                                    | <input type="radio"/> Nee                 |          |
| 8  |        |                                                                                                                    | <input type="radio"/> Niet van toepassing |          |
| 9  |        |                                                                                                                    |                                           |          |
| 10 |        |                                                                                                                    |                                           |          |
| 11 |        |                                                                                                                    |                                           |          |
| 12 | 8.15.1 | <b><i>If 'Heeft u moeite met op de tenen staan?' is equal to 'Ja' answer this question:</i></b>                    | (0.00)                                    | (100.00) |
| 13 |        | Hoeveel moeite heeft u met op de tenen staan?                                                                      |                                           |          |
| 14 |        |                                                                                                                    |                                           |          |
| 15 |        |                                                                                                                    |                                           |          |
| 16 | 8.16   | Heeft u moeite met opstaan uit de stoel?                                                                           | <input type="radio"/> Ja                  |          |
| 17 |        |                                                                                                                    | <input type="radio"/> Nee                 |          |
| 18 |        |                                                                                                                    | <input type="radio"/> Niet van toepassing |          |
| 19 |        |                                                                                                                    |                                           |          |
| 20 |        |                                                                                                                    |                                           |          |
| 21 |        |                                                                                                                    |                                           |          |
| 22 | 8.16.1 | <b><i>If 'Heeft u moeite met opstaan uit de stoel?' is equal to 'Ja' answer this question:</i></b>                 | (0.00)                                    | (100.00) |
| 23 |        | Hoeveel moeite heeft u met opstaan uit de stoel?                                                                   |                                           |          |
| 24 |        |                                                                                                                    |                                           |          |
| 25 |        |                                                                                                                    |                                           |          |
| 26 | 8.17   | Heeft u moeite met het op- of afstappen van stoepranden?                                                           | <input type="radio"/> Ja                  |          |
| 27 |        |                                                                                                                    | <input type="radio"/> Nee                 |          |
| 28 |        |                                                                                                                    | <input type="radio"/> Niet van toepassing |          |
| 29 |        |                                                                                                                    |                                           |          |
| 30 |        |                                                                                                                    |                                           |          |
| 31 |        |                                                                                                                    |                                           |          |
| 32 | 8.17.1 | <b><i>If 'Heeft u moeite met het op- of afstappen van stoepranden?' is equal to 'Ja' answer this question:</i></b> | (0.00)                                    | (100.00) |
| 33 |        | Hoeveel moeite heeft u met het op- of afstappen van stoepranden?                                                   |                                           |          |
| 34 |        |                                                                                                                    |                                           |          |
| 35 |        |                                                                                                                    |                                           |          |
| 36 |        |                                                                                                                    |                                           |          |
| 37 |        |                                                                                                                    |                                           |          |
| 38 |        |                                                                                                                    |                                           |          |
| 39 | 8.18   | Heeft u moeite met snel lopen of rennen?                                                                           | <input type="radio"/> Ja                  |          |
| 40 |        |                                                                                                                    | <input type="radio"/> Nee                 |          |
| 41 |        |                                                                                                                    | <input type="radio"/> Niet van toepassing |          |
| 42 |        |                                                                                                                    |                                           |          |
| 43 |        |                                                                                                                    |                                           |          |
| 44 | 8.18.1 | <b><i>If 'Heeft u moeite met snel lopen of rennen?' is equal to 'Ja' answer this question:</i></b>                 | (0.00)                                    | (100.00) |
| 45 |        | Hoeveel moeite heeft u met snel lopen of rennen?                                                                   |                                           |          |
| 46 |        |                                                                                                                    |                                           |          |
| 47 |        |                                                                                                                    |                                           |          |
| 48 |        |                                                                                                                    |                                           |          |
| 49 |        |                                                                                                                    |                                           |          |
| 50 |        |                                                                                                                    |                                           |          |
| 51 |        |                                                                                                                    |                                           |          |
| 52 |        |                                                                                                                    |                                           |          |

## Vragenlijst PRIMA studie - FAOS

| Number | Question | Answers |
|--------|----------|---------|
|--------|----------|---------|

Deze lijst vraagt naar uw mening over uw voet/enkel. Uw antwoorden geven ons een beeld van uw voet/enkel klachten en hoe u in staat bent om alledaagse activiteiten uit te voeren in uw huidige situatie. Beantwoorden van een vraag doet u door het aanklikken van een vakje met het volgens u meest juiste antwoord (één vakje per vraag). Als u niet zeker weet hoe u een vraag moet beantwoorden, geeft u dan het antwoord dat volgens u het meest op uw situatie van toepassing is. Deze vraag heeft betrekking op het voorkomen van voet/enkel klachten in de afgelopen week.

- |      |                                                                                                             |                                    |                                 |                                   |                                    |                                    |
|------|-------------------------------------------------------------------------------------------------------------|------------------------------------|---------------------------------|-----------------------------------|------------------------------------|------------------------------------|
| 9.1  | Is uw voet/enkel gezwollen?                                                                                 | <input type="radio"/> Nooit        | <input type="radio"/> Zelden    | <input type="radio"/> Soms        | <input type="radio"/> Vaak         | <input type="radio"/> Altijd       |
| 9.2  | Voelt u gekraak of hoort u klikken of een ander vreemd geluid wanneer u de voet/enkel beweegt?              | <input type="radio"/> Nooit        | <input type="radio"/> Zelden    | <input type="radio"/> Soms        | <input type="radio"/> Vaak         | <input type="radio"/> Altijd       |
| 9.3  | Hapert uw enkel of blokkeert uw enkel ('op slot' gaan zitten) wanneer u deze beweegt?                       | <input type="radio"/> Nooit        | <input type="radio"/> Zelden    | <input type="radio"/> Soms        | <input type="radio"/> Vaak         | <input type="radio"/> Altijd       |
| 9.4  | Kunt u de voet/enkel volledig strekken?                                                                     | <input type="radio"/> Altijd       | <input type="radio"/> Zelden    | <input type="radio"/> Soms        | <input type="radio"/> Vaak         | <input type="radio"/> Nooit        |
| 9.5  | Kunt u de voet volledig naar u toe buigen?                                                                  | <input type="radio"/> Altijd       | <input type="radio"/> Zelden    | <input type="radio"/> Soms        | <input type="radio"/> Vaak         | <input type="radio"/> Nooit        |
| 9.6  | In welke mate heeft u een stijf gevoel in de voet/enkel 's ochtends bij het wakker worden?                  | <input type="radio"/> Niet Ernstig | <input type="radio"/> Mild      | <input type="radio"/> Matig       | <input type="radio"/> Zeer ernstig | <input type="radio"/>              |
| 9.7  | In welke mate heeft u een stijf gevoel in de voet/enkel na zitten, liggen of rusten later op de dag?        | <input type="radio"/> Niet Ernstig | <input type="radio"/> Mild      | <input type="radio"/> Matig       | <input type="radio"/> Zeer ernstig | <input type="radio"/>              |
| 9.8  | Hoe vaak heeft u pijn in uw voet/enkel?                                                                     | <input type="radio"/> Nooit        | <input type="radio"/> Wekelijks | <input type="radio"/> Maandelijks | <input type="radio"/> Dagelijks    | <input type="radio"/> Altijd       |
| 9.9  | Hoeveel voet/enkel pijn heeft u gehad in de afgelopen week bij draaien als uw voet/enkel op de grond staat? | <input type="radio"/> Geen         | <input type="radio"/> Mild      | <input type="radio"/> Matig       | <input type="radio"/> Ernstig      | <input type="radio"/> Zeer ernstig |
| 9.10 | Hoeveel voet/enkel pijn heeft u gehad in de afgelopen week bij het volledig uitstrekken van de voet/enkel?  | <input type="radio"/> Geen         | <input type="radio"/> Mild      | <input type="radio"/> Matig       | <input type="radio"/> Ernstig      | <input type="radio"/> Zeer ernstig |

- 1  
2  
3  
4  
5  
6  
7  
8  
9
- 
- 10  
11  
12  
13  
14  
15  
16  
17  
18
- 19  
20  
21  
22  
23  
24  
25  
26
- 
- 27  
28  
29  
30  
31  
32  
33  
34  
35
- 
- 36  
37  
38  
39  
40  
41  
42  
43
- 
- 44  
45  
46  
47  
48  
49  
50  
51
- 
- 52  
53  
54  
55  
56
- 
- 57  
58  
59  
60
- 9.11 Hoeveel voet/enkel pijn heeft u gehad in de afgelopen week bij het volledig naar u toe buigen/optrekken van de voet/enkel
- Geen  
 Mild  
 Matig  
 Ernstig  
 Zeer ernstig
- 9.12 Hoeveel voet/enkel pijn heeft u gehad in de afgelopen week bij het lopen op een vlakke ondergrond
- Geen  
 Mild  
 Matig  
 Ernstig  
 Zeer ernstig
- 9.13 Hoeveel voet/enkel pijn heeft u gehad in de afgelopen week bij het trap op- en trap af lopen?
- Geen  
 Mild  
 Matig  
 Ernstig  
 Zeer ernstig
- 9.14 Hoeveel voet/enkel pijn heeft u gehad in de afgelopen week 's nachts in bed?
- Geen  
 Mild  
 Matig  
 Ernstig  
 Zeer ernstig
- 9.15 Hoeveel voet/enkel pijn heeft u gehad in de afgelopen week bij het zitten of liggen?
- Geen  
 Mild  
 Matig  
 Ernstig  
 Zeer ernstig
- 9.16 Hoeveel voet/enkel pijn heeft u gehad in de afgelopen week bij het rechtop staan?
- Geen  
 Mild  
 Matig  
 Ernstig  
 Zeer ernstig
- 9.17 In welke mate werd u gehinderd bij het trap aflopen?
- Niet  Mild  Matig   
Ernstig  Zeer ernstig
- 9.18 In welke mate werd u gehinderd bij het trap op lopen?
- Niet  Mild  Matig   
Ernstig  Zeer ernstig

1  
2  
3  
4  
5  
6  
7  
8  
9  
10  
11  
12  
13  
14  
15  
16  
17  
18  
19  
20  
21  
22  
23  
24  
25  
26  
27  
28  
29  
30  
31  
32  
33  
34  
35  
36  
37  
38  
39  
40  
41  
42  
43  
44  
45  
46  
47  
48  
49  
50  
51  
52  
53  
54  
55  
56  
57  
58  
59  
60

|      |                                                                                                                        |                                       |                                                                  |                             |                       |
|------|------------------------------------------------------------------------------------------------------------------------|---------------------------------------|------------------------------------------------------------------|-----------------------------|-----------------------|
| 9.19 | In welke mate werd u gehinderd als u vanuit een zittende positie ging staan?                                           | <input type="radio"/> Niet<br>Ernstig | <input type="radio"/> Mild<br><input type="radio"/> Zeer ernstig | <input type="radio"/> Matig | <input type="radio"/> |
| 9.20 | In welke mate werd u gehinderd bij het staan?                                                                          | <input type="radio"/> Niet<br>Ernstig | <input type="radio"/> Mild<br><input type="radio"/> Zeer ernstig | <input type="radio"/> Matig | <input type="radio"/> |
| 9.21 | In welke mate werd u gehinderd bij het naar de grond buigen/iets oprapen?                                              | <input type="radio"/> Niet<br>Ernstig | <input type="radio"/> Mild<br><input type="radio"/> Zeer ernstig | <input type="radio"/> Matig | <input type="radio"/> |
| 9.22 | In welke mate werd u gehinderd bij het lopen op een vlakke ondergrond?                                                 | <input type="radio"/> Niet<br>Ernstig | <input type="radio"/> Mild<br><input type="radio"/> Zeer ernstig | <input type="radio"/> Matig | <input type="radio"/> |
| 9.23 | In welke mate werd u gehinderd bij het in- en uit de auto stappen?                                                     | <input type="radio"/> Niet<br>Ernstig | <input type="radio"/> Mild<br><input type="radio"/> Zeer ernstig | <input type="radio"/> Matig | <input type="radio"/> |
| 9.24 | In welke mate werd u gehinderd bij het boodschappen doen?                                                              | <input type="radio"/> Niet<br>Ernstig | <input type="radio"/> Mild<br><input type="radio"/> Zeer ernstig | <input type="radio"/> Matig | <input type="radio"/> |
| 9.25 | In welke mate werd u gehinderd bij sokken/panty's aantrekken?                                                          | <input type="radio"/> Niet<br>Ernstig | <input type="radio"/> Mild<br><input type="radio"/> Zeer ernstig | <input type="radio"/> Matig | <input type="radio"/> |
| 9.26 | In welke mate werd u gehinderd bij het opstaan uit bed?                                                                | <input type="radio"/> Niet<br>Ernstig | <input type="radio"/> Mild<br><input type="radio"/> Zeer ernstig | <input type="radio"/> Matig | <input type="radio"/> |
| 9.27 | In welke mate werd u gehinderd bij het sokken uittrekken?                                                              | <input type="radio"/> Niet<br>Ernstig | <input type="radio"/> Mild<br><input type="radio"/> Zeer ernstig | <input type="radio"/> Matig | <input type="radio"/> |
| 9.28 | In welke mate werd u gehinderd bij het in bed liggen (omdraaien, lange tijd uw voet/enkel in dezelfde positie houden)? | <input type="radio"/> Niet<br>Ernstig | <input type="radio"/> Mild<br><input type="radio"/> Zeer ernstig | <input type="radio"/> Matig | <input type="radio"/> |
| 9.29 | In welke mate werd u gehinderd bij het in/uit bad stappen?                                                             | <input type="radio"/> Niet<br>Ernstig | <input type="radio"/> Mild<br><input type="radio"/> Zeer ernstig | <input type="radio"/> Matig | <input type="radio"/> |
| 9.30 | In welke mate werd u gehinderd bij zitten?                                                                             | <input type="radio"/> Niet<br>Ernstig | <input type="radio"/> Mild<br><input type="radio"/> Zeer ernstig | <input type="radio"/> Matig | <input type="radio"/> |
| 9.31 | In welke mate werd u gehinderd bij het toilet op en af gaan?                                                           | <input type="radio"/> Niet<br>Ernstig | <input type="radio"/> Mild<br><input type="radio"/> Zeer ernstig | <input type="radio"/> Matig | <input type="radio"/> |

|    |      |                                                       |                                    |                                    |
|----|------|-------------------------------------------------------|------------------------------------|------------------------------------|
| 1  |      |                                                       |                                    |                                    |
| 2  | 9.32 | In welke mate werd u gehinderd bij zwaar              | <input type="radio"/> Niet         | <input type="radio"/> Mild         |
| 3  |      | huishoudelijk werk (bijvoorbeeld zware dozen sjouwen, | <input type="radio"/> Matig        | <input type="radio"/>              |
| 4  |      | vloer schrobben)?                                     | <input type="radio"/> Ernstig      | <input type="radio"/> Zeer ernstig |
| 5  |      |                                                       |                                    |                                    |
| 6  | 9.33 | In welke mate werd u gehinderd bij licht huishoudeijk | <input type="radio"/> Niet         | <input type="radio"/> Mild         |
| 7  |      | werk (bijvoorbeeld koken, afstoffen)?                 | <input type="radio"/> Matig        | <input type="radio"/>              |
| 8  |      |                                                       | <input type="radio"/> Ernstig      | <input type="radio"/> Zeer ernstig |
| 9  |      |                                                       |                                    |                                    |
| 10 | 9.34 | In welke mate werd u gehinderd bij hurken?            | <input type="radio"/> Niet         | <input type="radio"/> Mild         |
| 11 |      |                                                       | <input type="radio"/> Matig        | <input type="radio"/>              |
| 12 |      |                                                       | <input type="radio"/> Ernstig      | <input type="radio"/> Zeer ernstig |
| 13 |      |                                                       |                                    |                                    |
| 14 | 9.35 | In welke mate werd u gehinderd bij hardlopen?         | <input type="radio"/> Niet         | <input type="radio"/> Mild         |
| 15 |      |                                                       | <input type="radio"/> Matig        | <input type="radio"/>              |
| 16 |      |                                                       | <input type="radio"/> Ernstig      | <input type="radio"/> Zeer ernstig |
| 17 |      |                                                       |                                    |                                    |
| 18 | 9.36 | In welke mate werd u gehinderd bij springen?          | <input type="radio"/> Niet         | <input type="radio"/> Mild         |
| 19 |      |                                                       | <input type="radio"/> Matig        | <input type="radio"/>              |
| 20 |      |                                                       | <input type="radio"/> Ernstig      | <input type="radio"/> Zeer ernstig |
| 21 |      |                                                       |                                    |                                    |
| 22 | 9.37 | In welke mate werd u gehinderd bij ronddraaien op uw  | <input type="radio"/> Niet         | <input type="radio"/> Mild         |
| 23 |      | aangedane voet/enkel?                                 | <input type="radio"/> Matig        | <input type="radio"/>              |
| 24 |      |                                                       | <input type="radio"/> Ernstig      | <input type="radio"/> Zeer ernstig |
| 25 |      |                                                       |                                    |                                    |
| 26 | 9.38 | In welke mate werd u gehinderd bij knielen?           | <input type="radio"/> Niet         | <input type="radio"/> Mild         |
| 27 |      |                                                       | <input type="radio"/> Matig        | <input type="radio"/>              |
| 28 |      |                                                       | <input type="radio"/> Ernstig      | <input type="radio"/> Zeer ernstig |
| 29 |      |                                                       |                                    |                                    |
| 30 | 9.39 | Hoe vaak bent u zich bewust van uw voet/enkel         | <input type="radio"/> Nooit        | <input type="radio"/> Maandelijks  |
| 31 |      | probleem?                                             | <input type="radio"/> Wekelijks    | <input type="radio"/> Dagelijks    |
| 32 |      |                                                       | <input type="radio"/> Altijd       |                                    |
| 33 |      |                                                       |                                    |                                    |
| 34 | 9.40 | Heeft u uw leven veranderd om activiteiten te         | <input type="radio"/> Niet         |                                    |
| 35 |      | vermijden die schadelijk kunnen zijn voor uw          | <input type="radio"/> Enigszins    |                                    |
| 36 |      | voet/enkel?                                           | <input type="radio"/> Matig        |                                    |
| 37 |      |                                                       | <input type="radio"/> Behoorlijk   |                                    |
| 38 |      |                                                       | <input type="radio"/> Volledig     |                                    |
| 39 |      |                                                       |                                    |                                    |
| 40 | 9.41 | In hoeverre kunt u op uw voet/enkel vertrouwen?       | <input type="radio"/> Volledig     |                                    |
| 41 |      |                                                       | <input type="radio"/> Behoorlijk   |                                    |
| 42 |      |                                                       | <input type="radio"/> Matig        |                                    |
| 43 |      |                                                       | <input type="radio"/> Enigszins    |                                    |
| 44 |      |                                                       | <input type="radio"/> Niet         |                                    |
| 45 |      |                                                       |                                    |                                    |
| 46 | 9.42 | In het algemeen, in welke mate ondervindt u hinder    | <input type="radio"/> Geen         |                                    |
| 47 |      | van uw voet/enkel                                     | <input type="radio"/> Mild         |                                    |
| 48 |      |                                                       | <input type="radio"/> Matig        |                                    |
| 49 |      |                                                       | <input type="radio"/> Ernstig      |                                    |
| 50 |      |                                                       | <input type="radio"/> Zeer ernstig |                                    |
| 51 |      |                                                       |                                    |                                    |
| 52 |      |                                                       |                                    |                                    |
| 53 |      |                                                       |                                    |                                    |
| 54 |      |                                                       |                                    |                                    |
| 55 |      |                                                       |                                    |                                    |
| 56 |      |                                                       |                                    |                                    |
| 57 |      |                                                       |                                    |                                    |
| 58 |      |                                                       |                                    |                                    |
| 59 |      |                                                       |                                    |                                    |
| 60 |      |                                                       |                                    |                                    |



## Vragenlijst PRIMA studie - PRODISQ - Gezondheid en werk

| Number | Question                                                                                                                                                                                                                                                                    | Answers                                                                                                                                                                                                                                                                                                                                                                                                                                                                                                                                                                |
|--------|-----------------------------------------------------------------------------------------------------------------------------------------------------------------------------------------------------------------------------------------------------------------------------|------------------------------------------------------------------------------------------------------------------------------------------------------------------------------------------------------------------------------------------------------------------------------------------------------------------------------------------------------------------------------------------------------------------------------------------------------------------------------------------------------------------------------------------------------------------------|
| 10.1   | Wat is uw leeftijd?                                                                                                                                                                                                                                                         | <input type="text"/> jaar                                                                                                                                                                                                                                                                                                                                                                                                                                                                                                                                              |
| 10.2   | Wat is uw geslacht?                                                                                                                                                                                                                                                         | <input type="radio"/> Man<br><input type="radio"/> Vrouw                                                                                                                                                                                                                                                                                                                                                                                                                                                                                                               |
| 10.3   | Wat is de hoogste opleiding die u heeft afgemaakt (Zoek uw hoogste opleiding en kruis het hokje daarvoor aan)?                                                                                                                                                              | <input type="checkbox"/> Ik heb geen school of opleiding afgemaakt<br><input type="checkbox"/> Lagere school of basisschool<br><input type="checkbox"/> Huishoudschool, vbo, lbo, lts, leao of lhno<br><input type="checkbox"/> Mavo, mulo, ivo of vmbo<br><input type="checkbox"/> Mbo, mts, meao, mhno, inas of intas<br><input type="checkbox"/> Havo, vwo, hbs, mms, atheneum of gymnasium<br><input type="checkbox"/> Hbo, hts, heao of hhno<br><input type="checkbox"/> Universiteit<br><input type="checkbox"/> Ik heb een andere opleiding afgemaakt, namelijk |
| 10.3.1 | <b><i>If 'Wat is de hoogste opleiding die u heeft afgemaakt (Zoek uw hoogste opleiding en kruis het hokje daarvoor aan)?' is equal to 'Ik heb een andere opleiding afgemaakt, namelijk' answer this question:</i></b><br>Wat is de hoogste opleiding die u heeft afgemaakt? | <input type="text"/>                                                                                                                                                                                                                                                                                                                                                                                                                                                                                                                                                   |
| 10.4   | Wat doet u in het dagelijks leven?                                                                                                                                                                                                                                          | <input type="checkbox"/> Ik zit op school, ik studeer<br><input type="checkbox"/> Ik werk in loondienst<br><input type="checkbox"/> Ik ben zelfstandig ondernemer<br><input type="checkbox"/> Ik ben huisvrouw, huisman<br><input type="checkbox"/> Ik ben werkloos<br><input type="checkbox"/> Ik ben arbeidsongeschikt<br><input type="checkbox"/> Ik ben met pensioen of prepensioen<br><input type="checkbox"/> Ik doe iets anders, namelijk                                                                                                                       |
| 10.4.1 | <b><i>If 'Wat doet u in het dagelijks leven?' is equal to 'Ik ben arbeidsongeschikt' answer this question:</i></b><br>Wat doet u in het dagelijks leven?                                                                                                                    | <input type="text"/>                                                                                                                                                                                                                                                                                                                                                                                                                                                                                                                                                   |

1  
2  
3  
4  
5  
6  
7  
8  
9  
10  
11  
12  
13  
14  
15  
16  
17  
18  
19  
20  
21  
22  
23  
24  
25  
26  
27  
28  
29  
30  
31  
32  
33  
34  
35  
36  
37  
38  
39  
40  
41  
42  
43  
44  
45  
46  
47  
48  
49  
50  
51  
52  
53  
54  
55  
56  
57  
58  
59  
60

|            |                                                                                                                                                                                                                                                                   |                                                                             |
|------------|-------------------------------------------------------------------------------------------------------------------------------------------------------------------------------------------------------------------------------------------------------------------|-----------------------------------------------------------------------------|
| 10.4.2     | <b>If 'Wat doet u in het dagelijks leven?' is equal to 'Ik doe iets anders, namelijk' answer this question:</b><br>Wat doet u in het dagelijks leven?                                                                                                             | <input type="text"/>                                                        |
| 10.5       | Hebt u betaald werk?                                                                                                                                                                                                                                              | <input type="radio"/> Nee<br><input type="radio"/> Ja                       |
| 10.5.1     | <b>If 'Hebt u betaald werk?' is equal to 'Ja' answer this question:</b><br>Wat is uw beroep?                                                                                                                                                                      | <input type="text"/>                                                        |
| 10.5.2     | <b>If 'Hebt u betaald werk?' is equal to 'Ja' answer this question:</b><br>Hoeveel uur per week werkt u (Tel alleen de uren waarvoor u betaald wordt)?                                                                                                            | <input type="text"/> uren                                                   |
| 10.5.3     | <b>If 'Hebt u betaald werk?' is equal to 'Ja' answer this question:</b><br>Hoeveel dagen in de week werkt u?                                                                                                                                                      | <input type="text"/> Dagen                                                  |
| 10.5.4     | <b>If 'Hebt u betaald werk?' is equal to 'Ja' answer this question:</b><br>Bent u in de afgelopen 4 weken afwezig geweest van uw werk omdat u ziek was?                                                                                                           | <input type="radio"/> Nee<br><input type="radio"/> Ja                       |
| 10.5.4.1   | <b>If 'Bent u in de afgelopen 4 weken afwezig geweest van uw werk omdat u ziek was?' is equal to 'Ja' answer this question:</b><br>Bent u in de afgelopen 4 weken afwezig geweest van uw werk omdat u ziek was (Tel alleen de werkdagen in de afgelopen 4 weken)? | <input type="text"/> dagen<br>afwezig geweest                               |
| 10.5.4.2   | <b>If 'Bent u in de afgelopen 4 weken afwezig geweest van uw werk omdat u ziek was?' is equal to 'Ja' answer this question:</b><br>Was u langer dan de gehele periode van 4 weken afwezig van uw werk doordat u ziek was?                                         | <input type="radio"/> Nee<br><input type="radio"/> Ja                       |
| 10.5.4.2.1 | <b>If 'Was u langer dan de gehele periode van 4 weken afwezig van uw werk doordat u ziek was?' is equal to 'Ja' answer this question:</b><br>Wanneer heeft u zich ziek gemeld?                                                                                    | <input type="text"/> <input type="text"/> <input type="text"/> (dd-mm-yyyy) |
| 10.5.5     | <b>If 'Hebt u betaald werk?' is equal to 'Ja' answer this question:</b><br>Waren er in de afgelopen 4 weken, dagen waarop u wel gewerkt heeft, maar tijdens uw werk last had van lichamelijke of psychische problemen?                                            | <input type="radio"/> Ja<br><input type="radio"/> Nee                       |

|          |                                                                                                                                                                                                                                                                                                                                                                                                                 |                                                       |                                            |
|----------|-----------------------------------------------------------------------------------------------------------------------------------------------------------------------------------------------------------------------------------------------------------------------------------------------------------------------------------------------------------------------------------------------------------------|-------------------------------------------------------|--------------------------------------------|
| 10.5.5.1 | <b>If 'Waren er in de afgelopen 4 weken, dagen waarop u wel gewerkt heeft, maar tijdens uw werk last had van lichamelijke of psychische problemen?' is equal to 'Ja' answer this question:</b><br>Op hoeveel werkdagen had u tijdens uw werk last van uw lichamelijke of psychische problemen?                                                                                                                  | <input type="text"/>                                  | werkdagen                                  |
| 10.5.5.2 | <b>If 'Waren er in de afgelopen 4 weken, dagen waarop u wel gewerkt heeft, maar tijdens uw werk last had van lichamelijke of psychische problemen?' is equal to 'Ja' answer this question:</b><br>Op de dagen dat u last had, kon u misschien niet zoveel werk doen als normaal. Hoeveel werk kon u op deze dagen gemiddeld doen?                                                                               | Ik kon op deze dagen niks doen (0.00)                 | Ik kon net zoveel doen als normaal (10.00) |
| 10.6     | Waren er dagen waarop u minder onbetaald werk kon doen door uw lichamelijke of psychische problemen?                                                                                                                                                                                                                                                                                                            | <input type="radio"/> Nee<br><input type="radio"/> Ja |                                            |
| 10.6.1   | <b>If 'Waren er dagen waarop u minder onbetaald werk kon doen door uw lichamelijke of psychische problemen?' is equal to 'Ja' answer this question:</b><br>Op hoeveel dagen was dit zo?                                                                                                                                                                                                                         | <input type="text"/>                                  | Dagen                                      |
| 10.6.2   | <b>If 'Waren er dagen waarop u minder onbetaald werk kon doen door uw lichamelijke of psychische problemen?' is equal to 'Ja' answer this question:</b><br>Stel dat iemand, bijvoorbeeld uw partner, familielid of een bekende, u op deze dagen had geholpen. En al het onbetaalde werk wat u niet kon doen, voor u had gedaan. Hoeveel uur was die persoon hier op deze dagen dan gemiddeld mee bezig geweest? | <input type="text"/>                                  | uur op deze dagen                          |

## Vragenlijst PRIMA studie - PRODISQ - Zorggebruik

| Number | Question                                                                                                                                                                                      | Answers                                               |
|--------|-----------------------------------------------------------------------------------------------------------------------------------------------------------------------------------------------|-------------------------------------------------------|
|        | Wij willen graag weten met welke dokters u in de afgelopen 3 maanden een afspraak had. Het gaat om afspraken voor uzelf. Ook andere zorgverleners tellen mee. Bijvoorbeeld de fysiotherapeut. |                                                       |
| 11.1   | Bent u in de afgelopen 3 maanden naar uw huisarts geweest?                                                                                                                                    | <input type="radio"/> Nee<br><input type="radio"/> Ja |
| 11.1.1 | <b>If 'Bent u in de afgelopen 3 maanden naar uw huisarts geweest?' is equal to 'Ja' answer this question:</b><br>Hoeveel afspraken had u?                                                     | <input type="text"/> afspraken                        |

|    |        |                                                                                                                                                                                              |                                |
|----|--------|----------------------------------------------------------------------------------------------------------------------------------------------------------------------------------------------|--------------------------------|
| 1  |        |                                                                                                                                                                                              |                                |
| 2  | 11.2   | Bent u in de afgelopen 3 maanden in contact geweest met een maatschappelijk werker?                                                                                                          | <input type="radio"/> Nee      |
| 3  |        |                                                                                                                                                                                              | <input type="radio"/> Ja       |
| 4  |        |                                                                                                                                                                                              |                                |
| 5  |        |                                                                                                                                                                                              |                                |
| 6  | 11.2.1 | <b>If 'Bent u in de afgelopen 3 maanden in contact geweest met een maatschappelijk werker?' is equal to 'Ja' answer this question:</b>                                                       | <input type="text"/> afspraken |
| 7  |        | Hoeveel afspraken had u?                                                                                                                                                                     |                                |
| 8  |        |                                                                                                                                                                                              |                                |
| 9  |        |                                                                                                                                                                                              |                                |
| 10 |        |                                                                                                                                                                                              |                                |
| 11 |        |                                                                                                                                                                                              |                                |
| 12 | 11.3   | Bent u in de afgelopen 3 maanden naar een fysiotherapeut geweest? Of een caesartherapeut, therapeut mensendieck of een manueel therapeut?                                                    | <input type="radio"/> Nee      |
| 13 |        |                                                                                                                                                                                              | <input type="radio"/> Ja       |
| 14 |        |                                                                                                                                                                                              |                                |
| 15 |        |                                                                                                                                                                                              |                                |
| 16 | 11.3.1 | <b>If 'Bent u in de afgelopen 3 maanden naar een fysiotherapeut geweest? Of een caesartherapeut, therapeut mensendieck of een manueel therapeut?' is equal to 'Ja' answer this question:</b> | <input type="text"/> afspraken |
| 17 |        | Hoeveel afspraken had u?                                                                                                                                                                     |                                |
| 18 |        |                                                                                                                                                                                              |                                |
| 19 |        |                                                                                                                                                                                              |                                |
| 20 |        |                                                                                                                                                                                              |                                |
| 21 |        |                                                                                                                                                                                              |                                |
| 22 |        |                                                                                                                                                                                              |                                |
| 23 | 11.4   | Bent u in de afgelopen 3 maanden naar een ergotherapeut geweest?                                                                                                                             | <input type="radio"/> Nee      |
| 24 |        |                                                                                                                                                                                              | <input type="radio"/> Ja       |
| 25 |        |                                                                                                                                                                                              |                                |
| 26 |        |                                                                                                                                                                                              |                                |
| 27 | 11.4.1 | <b>If 'Bent u in de afgelopen 3 maanden naar een ergotherapeut geweest?' is equal to 'Ja' answer this question:</b>                                                                          | <input type="text"/> afspraken |
| 28 |        | Hoeveel afspraken had u?                                                                                                                                                                     |                                |
| 29 |        |                                                                                                                                                                                              |                                |
| 30 |        |                                                                                                                                                                                              |                                |
| 31 |        |                                                                                                                                                                                              |                                |
| 32 |        |                                                                                                                                                                                              |                                |
| 33 | 11.5   | Bent u in de afgelopen 3 maanden naar een logopedist geweest?                                                                                                                                | <input type="radio"/> Nee      |
| 34 |        |                                                                                                                                                                                              | <input type="radio"/> Ja       |
| 35 |        |                                                                                                                                                                                              |                                |
| 36 |        |                                                                                                                                                                                              |                                |
| 37 | 11.5.1 | <b>If 'Bent u in de afgelopen 3 maanden naar een logopedist geweest?' is equal to 'Ja' answer this question:</b>                                                                             | <input type="text"/> afspraken |
| 38 |        | Hoeveel afspraken had u?                                                                                                                                                                     |                                |
| 39 |        |                                                                                                                                                                                              |                                |
| 40 |        |                                                                                                                                                                                              |                                |
| 41 |        |                                                                                                                                                                                              |                                |
| 42 |        |                                                                                                                                                                                              |                                |
| 43 | 11.6   | Bent u in de afgelopen 3 maanden naar een diëtist geweest?                                                                                                                                   | <input type="radio"/> Nee      |
| 44 |        |                                                                                                                                                                                              | <input type="radio"/> Ja       |
| 45 |        |                                                                                                                                                                                              |                                |
| 46 |        |                                                                                                                                                                                              |                                |
| 47 | 11.6.1 | <b>If 'Bent u in de afgelopen 3 maanden naar een diëtist geweest?' is equal to 'Ja' answer this question:</b>                                                                                | <input type="text"/> afspraken |
| 48 |        | Hoeveel afspraken had u?                                                                                                                                                                     |                                |
| 49 |        |                                                                                                                                                                                              |                                |
| 50 |        |                                                                                                                                                                                              |                                |
| 51 |        |                                                                                                                                                                                              |                                |
| 52 | 11.7   | Bent u in de afgelopen 3 maanden naar een homeopaat geweest? Of een acupuncturist?                                                                                                           | <input type="radio"/> Nee      |
| 53 |        |                                                                                                                                                                                              | <input type="radio"/> Ja       |
| 54 |        |                                                                                                                                                                                              |                                |
| 55 |        |                                                                                                                                                                                              |                                |
| 56 | 11.7.1 | <b>If 'Bent u in de afgelopen 3 maanden naar een homeopaat geweest? Of een acupuncturist?' is equal to 'Ja' answer this question:</b>                                                        | <input type="text"/> afspraken |
| 57 |        | Hoeveel afspraken had u?                                                                                                                                                                     |                                |
| 58 |        |                                                                                                                                                                                              |                                |
| 59 |        |                                                                                                                                                                                              |                                |
| 60 |        |                                                                                                                                                                                              |                                |

1  
2  
3  
4  
5

11.8 Bent u in de afgelopen 3 maanden naar een psycholoog geweest? Of een psychotherapeut of psychiater?

Nee  
 Ja

6  
7  
8  
9  
10

11.8.1 ***If 'Bent u in de afgelopen 3 maanden naar een psycholoog geweest? Of een psychotherapeut of psychiater?' is equal to 'Ja' answer this question:***  
Hoeveel afspraken had u?

afspraken

11  
12  
13  
14  
15

11.9 Heeft u in de afgelopen 3 maanden afspraken gehad met de bedrijfsarts?

Nee  
 Ja

16  
17  
18  
19  
20

11.9.1 ***If 'Heeft u in de afgelopen 3 maanden afspraken gehad met de bedrijfsarts?' is equal to 'Ja' answer this question:***  
Hoeveel afspraken had u?

afspraken

21  
22  
23  
24  
25

11.10 Heeft u in de afgelopen 3 maanden hulp van de thuiszorg gehad?

Ja  
 Nee

26  
27  
28  
29  
30  
31  
32  
33  
34  
35  
36

11.10.1 ***If 'Heeft u in de afgelopen 3 maanden hulp van de thuiszorg gehad?' is equal to 'Ja' answer this question:***  
Wat voor hulp van de thuiszorg heeft u gehad in de afgelopen 3 maanden?

Huishoudelijke hulp; voorbeeld: stofzuigen, bed opmaken, boodschappen doen  
 Verzorging van uzelf; voorbeeld: hulp bij douchen of aankleden  
 Verpleging; voorbeeld: verband omdoen, medicijnen geven, bloeddruk meten

37  
38  
39  
40  
41  
42  
43  
44

11.10.1.1 ***If 'Wat voor hulp van de thuiszorg heeft u gehad in de afgelopen 3 maanden?' is equal to 'Huishoudelijke hulp; voorbeeld: stofzuigen, bed opmaken, boodschappen doen' answer this question:***  
Hoeveel weken heeft u deze thuiszorg gehad?  
Huishoudelijke hulp:

weken in de afgelopen 3 maanden

45  
46  
47  
48  
49  
50  
51  
52

11.10.1.2 ***If 'Wat voor hulp van de thuiszorg heeft u gehad in de afgelopen 3 maanden?' is equal to 'Verzorging van uzelf; voorbeeld: hulp bij douchen of aankleden' answer this question:***  
Hoeveel weken heeft u deze thuiszorg gehad?  
Verzorging van uzelf:

weken in de afgelopen 3 maanden

53  
54  
55  
56  
57  
58  
59  
60

11.10.1.3 ***If 'Wat voor hulp van de thuiszorg heeft u gehad in de afgelopen 3 maanden?' is equal to 'Verpleging; voorbeeld: verband omdoen, medicijnen geven, bloeddruk meten' answer this question:***  
Hoeveel weken heeft u deze thuiszorg gehad?  
Verpleging:

weken in de afgelopen 3 maanden

1  
2  
3  
4  
5  
6  
7  
8  
9

11.10.1.4 **If 'Wat voor hulp van de thuiszorg heeft u gehad in de afgelopen 3 maanden?' is equal to 'Huishoudelijke hulp; voorbeeld: stofzuigen, bed opmaken, boodschappen doen' answer this question:**

Hoeveel uur thuiszorg kreeg u in deze weken gemiddeld? Huishoudelijke hulp: gemiddeld

uur in de week

10  
11  
12  
13  
14  
15  
16  
17

11.10.1.5 **If 'Wat voor hulp van de thuiszorg heeft u gehad in de afgelopen 3 maanden?' is equal to 'Verzorging van uzelf; voorbeeld: hulp bij douchen of aankleden' answer this question:**

Hoeveel uur thuiszorg kreeg u in deze weken gemiddeld? Verzorging van uzelf: gemiddeld

uur in de week

18  
19  
20  
21  
22  
23  
24  
25

11.10.1.6 **If 'Wat voor hulp van de thuiszorg heeft u gehad in de afgelopen 3 maanden?' is equal to 'Verpleging; voorbeeld: verband omdoen, medicijnen geven, bloeddruk meten' answer this question:**

Hoeveel uur thuiszorg kreeg u in deze weken gemiddeld? Verpleging: gemiddeld

uur in de week

26  
27  
28  
29

11.11 Heeft u in de afgelopen 3 maanden medicijnen gebruikt?

Ja  
 Nee

30  
31  
32  
33  
34  
35

11.11.1 **If 'Heeft u in de afgelopen 3 maanden medicijnen gebruikt?' is equal to 'Ja' answer this question:**  
Welke medicijnen heeft u in de afgelopen 3 maanden gebruikt?

36  
37  
38  
39  
40

11.12 Bent u in de afgelopen 3 maanden op de spoedeisende eerste hulp van een ziekenhuis geweest? (Een andere naam voor spoedeisende eerste hulp is EHBO)

Nee  
 Ja

41  
42  
43  
44  
45  
46  
47

11.12.1 **If 'Bent u in de afgelopen 3 maanden op de spoedeisende eerste hulp van een ziekenhuis geweest? (Een andere naam voor spoedeisende eerste hulp is EHBO)' is equal to 'Ja' answer this question:**  
Hoe vaak bent u geweest?

keer

48  
49  
50  
51  
52

11.13 Bent u in de afgelopen 3 maanden met een ambulance naar het ziekenhuis gebracht? (Een andere naam voor ambulance is ziekenauto)

Nee  
 Ja

53  
54  
55  
56  
57  
58  
59  
60

11.13.1 **If 'Bent u in de afgelopen 3 maanden met een ambulance naar het ziekenhuis gebracht? (Een andere naam voor ambulance is ziekenauto)' is equal to 'Ja' answer this question:**  
Hoe vaak bent u naar het ziekenhuis gebracht?

keer

1  
2  
3  
4  
5  
6

11.14 Had u in de afgelopen 3 maanden een afspraak bij de polikliniek van het ziekenhuis? (Het gaat om afspraken voor uzelf met een dokter. Bijvoorbeeld met de cardioloog, reumatoloog of neuroloog)

Ja  
 Nee

7  
8  
9  
10  
11  
12  
13  
14  
15

11.14.1 **If 'Had u in de afgelopen 3 maanden een afspraak bij de polikliniek van het ziekenhuis? (Het gaat om afspraken voor uzelf met een dokter. Bijvoorbeeld met de cardioloog, reumatoloog of neuroloog)' is equal to 'Ja' answer this question:**  
Bij welke soorten dokters bent u in de afgelopen 3 maanden in het ziekenhuis geweest? En hoe vaak?

16  
17  
18  
19  
20

11.15 Bent u in de afgelopen 3 maanden overdag in het ziekenhuis geweest voor een behandeling? (U bleef dus niet slapen. U kwam bijvoorbeeld voor een bloedtransfusie, nierdialyse of chemokuur)

Ja  
 Nee

21  
22  
23  
24  
25  
26  
27  
28

11.15.1 **If 'Bent u in de afgelopen 3 maanden overdag in het ziekenhuis geweest voor een behandeling? (U bleef dus niet slapen. U kwam bijvoorbeeld voor een bloedtransfusie, nierdialyse of chemokuur)' is equal to 'Ja' answer this question:**  
Voor welke soort behandeling was dit?

29  
30  
31  
32  
33  
34  
35  
36

11.15.2 **If 'Bent u in de afgelopen 3 maanden overdag in het ziekenhuis geweest voor een behandeling? (U bleef dus niet slapen. U kwam bijvoorbeeld voor een bloedtransfusie, nierdialyse of chemokuur)' is equal to 'Ja' answer this question:**  
Hoeveel keer moest u in de afgelopen 3 maanden voor deze behandelingen naar het ziekenhuis?

37  
38  
39  
40  
41  
42  
43  
44

11.16 Bent u in de afgelopen 3 maanden ergens anders geweest voor een behandeling overdag? (U bleef dus niet slapen. U ging bijvoorbeeld naar de dagopvang van een woon-/zorgcentrum of een psychiatrische instelling. Of naar de dagbehandeling van een revalidatiecentrum)

Ja  
 Nee

45  
46  
47  
48  
49  
50  
51  
52  
53

11.16.1 **If 'Bent u in de afgelopen 3 maanden ergens anders geweest voor een behandeling overdag? (U bleef dus niet slapen. U ging bijvoorbeeld naar de dagopvang van een woon-/zorgcentrum of een psychiatrische instelling. Of naar de dagbehandeling van een revalidatiecentrum)' is equal to 'Ja' answer this question:**  
Wat voor instelling was dit?

Woon-/zorgcentrum  
 Revalidatiecentrum  
 Psychiatrische instelling  
 Een andere instelling, namelijk

54  
55  
56  
57  
58  
59  
60

11.16.1.1 **If 'Wat voor instelling was dit?' is equal to 'Een andere instelling, namelijk' answer this question:**  
Wat voor instelling was dit?

|           |                                                                                                                                                                                                                                                                                                 |                                                                                                                                                                                                             |
|-----------|-------------------------------------------------------------------------------------------------------------------------------------------------------------------------------------------------------------------------------------------------------------------------------------------------|-------------------------------------------------------------------------------------------------------------------------------------------------------------------------------------------------------------|
| 11.16.1.2 | <b>If 'Wat voor instelling was dit?' is equal to 'Woon-/zorgcentrum' answer this question:</b><br>Hoe vaak moest u hier in de afgelopen 3 maanden naartoe? Naar het woon-/zorgcentrum:                                                                                                          | <input type="text"/> keer in de afgelopen 3 maanden                                                                                                                                                         |
| 11.16.1.3 | <b>If 'Wat voor instelling was dit?' is equal to 'Revalidatiecentrum' answer this question:</b><br>Hoe vaak moest u hier in de afgelopen 3 maanden naartoe? Naar het revalidatiecentrum:                                                                                                        | <input type="text"/> keer in de afgelopen 3 maanden                                                                                                                                                         |
| 11.16.1.4 | <b>If 'Wat voor instelling was dit?' is equal to 'Psychiatrische instelling' answer this question:</b><br>Hoe vaak moest u hier in de afgelopen 3 maanden naartoe? Naar de psychiatrische instelling:                                                                                           | <input type="text"/> keer in de afgelopen 3 maanden                                                                                                                                                         |
| 11.16.1.5 | <b>If 'Wat voor instelling was dit?' is equal to 'Een andere instelling, namelijk' answer this question:</b><br>Hoe vaak moest u hier in de afgelopen 3 maanden naartoe? Naar de andere instelling:                                                                                             | <input type="text"/> keer in de afgelopen 3 maanden                                                                                                                                                         |
| 11.17     | Heeft u in de afgelopen 3 maanden weleens in het ziekenhuis gelegen? (U moest dus blijven slapen. Bijvoorbeeld omdat u geopereerd was en niet meteen naar huis kon)                                                                                                                             | <input type="radio"/> Ja<br><input type="radio"/> Nee                                                                                                                                                       |
| 11.17.1   | <b>If 'Heeft u in de afgelopen 3 maanden weleens in het ziekenhuis gelegen? (U moest dus blijven slapen. Bijvoorbeeld omdat u geopereerd was en niet meteen naar huis kon)' is equal to 'Ja' answer this question:</b><br>Hoe vaak heeft u in de afgelopen 3 maanden in het ziekenhuis gelegen? | <input type="text"/> keer in de afgelopen 3 maanden                                                                                                                                                         |
| 11.17.2   | <b>If 'Heeft u in de afgelopen 3 maanden weleens in het ziekenhuis gelegen? (U moest dus blijven slapen. Bijvoorbeeld omdat u geopereerd was en niet meteen naar huis kon)' is equal to 'Ja' answer this question:</b><br>Hoe lang heeft u in het ziekenhuis gelegen?                           | <input type="text"/> dagen in de afgelopen 3 maanden                                                                                                                                                        |
| 11.18     | Moest u in de afgelopen 3 maanden ergens anders blijven slapen voor uw gezondheid? (Bijvoorbeeld in een woon-/zorgcentrum, psychiatrische instelling of revalidatiecentrum)                                                                                                                     | <input type="radio"/> Ja<br><input type="radio"/> Nee                                                                                                                                                       |
| 11.18.1   | <b>If 'Moest u in de afgelopen 3 maanden ergens anders blijven slapen voor uw gezondheid? (Bijvoorbeeld in een woon-/zorgcentrum, psychiatrische instelling of revalidatiecentrum)' is equal to 'Ja' answer this question:</b><br>Wat voor instelling was dit?                                  | <input type="checkbox"/> Woon-/zorgcentrum<br><input type="checkbox"/> Revalidatiecentrum<br><input type="checkbox"/> Psychiatrische instelling<br><input type="checkbox"/> Een andere instelling, namelijk |



- 1  
2  
3  
4  
5  
6  
7
- 11.18.1.1 **If 'Wat voor instelling was dit?' is equal to 'Een andere instelling, namelijk' answer this question:**  
Een andere instelling, namelijk
- 11.18.1.2 **If 'Wat voor instelling was dit?' is equal to 'Woon-/zorgcentrum' answer this question:**  
Hoe lang bent u in deze instelling geweest? In het woon-/zorgcentrum:
- 11.18.1.3 **If 'Wat voor instelling was dit?' is equal to 'Revalidatiecentrum' answer this question:**  
Hoe lang bent u in deze instelling geweest? In het revalidatiecentrum:
- 11.18.1.4 **If 'Wat voor instelling was dit?' is equal to 'Psychiatrische instelling' answer this question:**  
Hoe lang bent u in deze instelling geweest? In de psychiatrische instelling:
- 11.18.1.5 **If 'Wat voor instelling was dit?' is equal to 'Een andere instelling, namelijk' answer this question:**  
Hoe lang bent u in deze instelling geweest? In de andere instelling:
- 11.19 Heeft u in de afgelopen 3 maanden hulp gekregen van een familielid of een bekende vanwege uw lichamelijke of psychische problemen?
- 11.19.1 **If 'Heeft u in de afgelopen 3 maanden hulp gekregen van een familielid of een bekende vanwege uw lichamelijke of psychische problemen?' is equal to 'Ja' answer this question:**  
Wat voor hulp van familieleden of bekenden heeft u gehad in de afgelopen 3 maanden?
- 11.19.1.1 **If 'Wat voor hulp van familieleden of bekenden heeft u gehad in de afgelopen 3 maanden?' is equal to 'Huishoudelijke hulp - voorbeeld: stofzuigen, bed opmaken, boodschappen doen, klaarmaken van eten en drinken, verzorgen van kinderen' answer this question:**  
Hoeveel weken heeft u deze hulp gehad?  
Huishoudelijke hulp:

1  
2  
3  
4  
5  
6  
7  
8  
9

11.19.1.2 **If 'Wat voor hulp van familieleden of bekenden heeft u gehad in de afgelopen 3 maanden?' is equal to 'Verzorging van uzelf - voorbeeld: hulp bij douchen of aankleden, hulp bij het eten en drinken of het geven van medicijnen' answer this question:**  
Hoeveel weken heeft u deze hulp gehad? Verzorging van uzelf:

weken in de afgelopen 3 maanden

10  
11  
12  
13  
14  
15  
16  
17  
18  
19  
20  
21

11.19.1.3 **If 'Wat voor hulp van familieleden of bekenden heeft u gehad in de afgelopen 3 maanden?' is equal to 'Praktische hulp - voorbeeld: ondersteuning bij wandelen, het maken van uitstapjes of bezoeken aan bekenden, bezoeken aan de huisarts of het ziekenhuis, het regelen van hulp of het regelen van financiële zaken' answer this question:**  
Hoeveel uur hulp kreeg u in deze weken gemiddeld?  
Praktische hulp:

weken in de afgelopen 3 maanden

22  
23  
24  
25  
26  
27  
28  
29  
30  
31

11.19.1.4 **If 'Wat voor hulp van familieleden of bekenden heeft u gehad in de afgelopen 3 maanden?' is equal to 'Huishoudelijke hulp - voorbeeld: stofzuigen, bed opmaken, boodschappen doen, klaarmaken van eten en drinken, verzorgen van kinderen' answer this question:**  
Hoeveel uur hulp kreeg u in deze weken gemiddeld?  
Huishoudelijke hulp: gemiddeld

uur in de week

32  
33  
34  
35  
36  
37  
38  
39

11.19.1.5 **If 'Wat voor hulp van familieleden of bekenden heeft u gehad in de afgelopen 3 maanden?' is equal to 'Verzorging van uzelf - voorbeeld: hulp bij douchen of aankleden, hulp bij het eten en drinken of het geven van medicijnen' answer this question:**  
Hoeveel uur hulp kreeg u in deze weken gemiddeld?  
Verzorging van uzelf: gemiddeld

uur in de week

40  
41  
42  
43  
44  
45  
46  
47  
48  
49  
50  
51  
52  
53  
54  
55

11.19.1.6 **If 'Wat voor hulp van familieleden of bekenden heeft u gehad in de afgelopen 3 maanden?' is equal to 'Praktische hulp - voorbeeld: ondersteuning bij wandelen, het maken van uitstapjes of bezoeken aan bekenden, bezoeken aan de huisarts of het ziekenhuis, het regelen van hulp of het regelen van financiële zaken' answer this question:**  
Hoeveel uur hulp kreeg u in deze weken gemiddeld?  
Praktische hulp: gemiddeld

uur in de week

## Vragenlijst PRIMA studie - Dank

| Number | Question | Answers |
|--------|----------|---------|
|--------|----------|---------|

1  
2  
3  
4  
5  
6  
7  
8  
9  
10  
11  
12  
13  
14  
15  
16  
17  
18  
19  
20  
21  
22  
23  
24  
25  
26  
27  
28  
29  
30  
31  
32  
33  
34  
35  
36  
37  
38  
39  
40  
41  
42  
43  
44  
45  
46  
47  
48  
49  
50  
51  
52  
53  
54  
55  
56  
57  
58  
59  
60

12.1 Hartelijk dank voor de tijd die u heeft genomen om de vragenlijsten in te vullen. Indien u nog opmerkingen heeft kunt u deze hierin plaatsen.

## Survey 'Vragenlijst PRIMA studie 12 weken'

### Vragenlijst PRIMA studie 12 weken - AOFAS - Pijn

| Number | Question                            | Answers                                                                                                                                                                                                         |
|--------|-------------------------------------|-----------------------------------------------------------------------------------------------------------------------------------------------------------------------------------------------------------------|
| 1.1    | Hoeveel pijn ervaart u aan uw voet? | <input type="checkbox"/> Geen<br><input type="checkbox"/> Milde pijnklachten of af en toe pijn<br><input type="checkbox"/> Matige pijnklachten, dagelijks<br><input type="checkbox"/> Vrijwel continu erge pijn |

### Vragenlijst PRIMA studie 12 weken - AOFAS resterende gedeelte

| Number | Question                                              | Answers                                                                                                                                                                                                                                                                                                                                                                                                                                              |
|--------|-------------------------------------------------------|------------------------------------------------------------------------------------------------------------------------------------------------------------------------------------------------------------------------------------------------------------------------------------------------------------------------------------------------------------------------------------------------------------------------------------------------------|
| 2.1    | Hoeveel beperkingen in het dagelijks leven ervaart u? | <input type="radio"/> Geen beperkingen, geen hulpmiddelen nodig<br><input type="radio"/> Geen beperkingen in algemeen dagelijkse bezigheden, wel beperkingen in recreatieve activiteiten (sport, hobbies, etc) geen ondersteuning<br><input type="radio"/> Beperkingen bij dagelijkse- en recreatieve activiteiten, stok<br><input type="radio"/> Ernstige beperkingen bij dagelijkse- en recreatieve activiteiten, walker, krukken, rolstoel, brace |
| 2.2    | Wat is de afstand die u in één keer kunt lopen?       | <input type="radio"/> Meer dan 600 meter<br><input type="radio"/> 400 - 600 meter<br><input type="radio"/> 100 - 300 meter<br><input type="radio"/> Minder dan 100 meter                                                                                                                                                                                                                                                                             |

|     |                                                                                                                            |                                                                                                                                                                                                                                                                                                             |
|-----|----------------------------------------------------------------------------------------------------------------------------|-------------------------------------------------------------------------------------------------------------------------------------------------------------------------------------------------------------------------------------------------------------------------------------------------------------|
| 2.3 | Heeft u moeite met lopen op een bepaalde ondergrond?                                                                       | <input type="radio"/> Geen problemen bij lopen<br><input type="radio"/> Enig problemen op ongelijke ondergrond, trap, helling, ladders<br><input type="radio"/> Ernstige problemen bij ongelijke ondergrond, trap, helling, ladders                                                                         |
| 2.4 | Hoe zou u uw looppatroon beoordelen?                                                                                       | <input type="radio"/> Normaal of minimaal afwijkend<br><input type="radio"/> Duidelijk<br><input type="radio"/> Ernstig                                                                                                                                                                                     |
| 2.5 | Hoe zou u de beweeglijkheid van uw voet beoordelen ten opzichte van de andere zijde of ten opzichte van vóór het ongeval?  | <input type="radio"/> Hetzelfde of licht beperkt t.o.v. de niet aangedane zijde of zoals voor het ongeval<br><input type="radio"/> Ongeveer de helft beperkt<br><input type="radio"/> Sterk verminderd, bijna geen bewegingen mogelijk                                                                      |
| 2.6 | Hoe zou u de beweeglijkheid van uw enkel beoordelen ten opzichte van de andere zijde of ten opzichte van voor het ongeval? | <input type="radio"/> Hetzelfde of licht beperkt t.o.v. de niet aangedane zijde of zoals voor het ongeval<br><input type="radio"/> Ongeveer de helft beperkt<br><input type="radio"/> Sterk verminderd, bijna geen bewegingen mogelijk                                                                      |
| 2.7 | Hoe zou u de stabiliteit van uw voet en enkel beoordelen                                                                   | <input type="radio"/> Stabiel, ik verzwik mijn enkel hooguit incidenteel<br><input type="radio"/> Niet stabiel, ik verzwik mijn enkel vaak                                                                                                                                                                  |
| 2.8 | Hoe zou u de stand van uw voet beoordelen ten opzichte van de andere zijde of ten opzichte van voor het ongeval?           | <input type="radio"/> Goed, ik kan mijn voet goed plat op de grond zetten, waarbij de stand niet afwijkend is<br><input type="radio"/> Ik sta vrijwel alleen op de buitenzijde van mijn voet<br><input type="radio"/> Ik kan mijn voet niet plat op de grond zetten en loop vrijwel alleen op mijn voorvoet |

## Vragenlijst PRIMA studie 12 weken - VAS Pain score

| Number | Question                                                                                                                                                             | Answers             |
|--------|----------------------------------------------------------------------------------------------------------------------------------------------------------------------|---------------------|
| 3.1    | VAS pijnscore (Geef uw minimaal pijnscore aan tijdens dagelijkse activiteiten op een schaal van 0 tot 100, waarbij 0 geen pijn is en 100 de ergste pijn denkbaar is) | (0.00) 100 (100.00) |

1  
2  
3  
4  
5  
6  
7  
8  
9  
10  
11  
12  
13  
14  
15  
16  
17  
18  
19  
20  
21  
22  
23  
24  
25  
26  
27  
28  
29  
30  
31  
32  
33  
34  
35  
36  
37  
38  
39  
40  
41  
42  
43  
44  
45  
46  
47  
48  
49  
50  
51  
52  
53  
54  
55  
56  
57  
58  
59  
60

## Vragenlijst PRIMA studie 12 weken - AAS

| Number | Question | Answers |
|--------|----------|---------|
|--------|----------|---------|

---

- 1  
2  
3  
4  
5  
6  
7  
8  
9  
10  
11  
12  
13  
14  
15  
16  
17  
18  
19  
20  
21  
22  
23  
24  
25  
26  
27  
28  
29  
30  
31  
32  
33  
34  
35  
36  
37  
38  
39  
40  
41  
42  
43  
44  
45  
46  
47  
48  
49  
50  
51  
52  
53  
54  
55  
56  
57  
58  
59  
60
- 4.1 Wat is het meest bij u van toepassing ten aanzien van uw acitiviteit?
- American Football
  - Basketbal
  - Gymnastiek/turnen
  - Handbal
  - Rugby
  - Voetbal
  - Hockey
  - Korfbal
  - Gevechtssporten: judo, karate, kung fu, taekwando, jiu jitsu, etc.
  - Oriëntatiewandelen
  - Rhythmische gymnastiek
  - Volleybal
  - Boxen
  - Freestyle snowboarden
  - IJshockey
  - Tennis
  - Worstelen
  - Fitness, aerobics
  - Badminton
  - Baseball
  - Cross-country hardlopen
  - Moderne pentathlon
  - Squash
  - Surfen, windsurfen
  - Tafel tennis
  - Atletiek: spring-, werponderdelen
  - Waterskiën
  - Dans
  - Schermen
  - Zaalhockey
  - Bergbeklimmen
  - Langlauf
  - Parachute springen
  - Softball
  - Speciale beroepen en werkactiviteiten; speciale beroepen: ballet, professioneel soldaat, speciale reddingswerker, stuntman, etc.
  - Duiken
  - Scubaduiken
  - Skaten, in-line skaten
  - Atletiek: looponderdelen
  - Triatlon
  - Gewichtsheffen, body-building

- Alle competitieve sporten hieronder met 'seasonal' conditioning
- Zwaar fysiek werk
- Alpine skiën en snowboarden
- Bowlen/curlen
- Golf
- Mountainbike/BMX
- Powerliften
- Zeilen
- Fysiek werk
- Wielrennen
- Paardrijden
- Motorsporten/technische sporten
- Roeien, kayakken
- Boogschieten
- Water polo en zwemmen
- Kunnen lopen op oneven grond
- Geen sport, echter geen limitatie in dagelijkse activiteiten
- Kunnen lopen op even grond, maar de dagelijkse activiteiten zijn gelimiteerd
- Niet kunnen lopen, fysieke handicap wegens enkelproblemen

- 
- 4.1.1 ***If 'Wat is het meest bij u van toepassing ten aanzien van uw activiteit?' is equal to 'American Football' answer this question:***  
American Football
- Professioneel
- Competitief
- Recreatief
- 
- 4.1.2 ***If 'Wat is het meest bij u van toepassing ten aanzien van uw activiteit?' is equal to 'Basketbal' answer this question:***  
Basketbal
- Professioneel
- Competitief
- Recreatief
- 
- 4.1.3 ***If 'Wat is het meest bij u van toepassing ten aanzien van uw activiteit?' is equal to 'Gymnastiek/turnen' answer this question:***  
Gymnastiek/turnen
- Professioneel
- Competitief
- Recreatief
- 
- 4.1.4 ***If 'Wat is het meest bij u van toepassing ten aanzien van uw activiteit?' is equal to 'Handbal' answer this question:***  
Handbal
- Professioneel
- Competitief
- Recreatief
- 
- 4.1.5 ***If 'Wat is het meest bij u van toepassing ten aanzien van uw activiteit?' is equal to 'Rugby' answer this question:***  
Rugby
- Professioneel
- Competitief
- Recreatief

|    |        |                                                                                                                                                                                          |                                     |
|----|--------|------------------------------------------------------------------------------------------------------------------------------------------------------------------------------------------|-------------------------------------|
| 1  |        |                                                                                                                                                                                          |                                     |
| 2  | 4.1.6  | <b>If 'Wat is het meest bij u van toepassing ten aanzien van uw acitiviteit?' is equal to 'Voetbal' answer this question:</b>                                                            | <input type="radio"/> Professioneel |
| 3  |        |                                                                                                                                                                                          | <input type="radio"/> Competitief   |
| 4  |        |                                                                                                                                                                                          | <input type="radio"/> Recreatief    |
| 5  |        | Voetbal                                                                                                                                                                                  |                                     |
| 6  |        |                                                                                                                                                                                          |                                     |
| 7  |        |                                                                                                                                                                                          |                                     |
| 8  | 4.1.7  | <b>If 'Wat is het meest bij u van toepassing ten aanzien van uw acitiviteit?' is equal to 'Hockey' answer this question:</b>                                                             | <input type="radio"/> Professioneel |
| 9  |        |                                                                                                                                                                                          | <input type="radio"/> Competitief   |
| 10 |        |                                                                                                                                                                                          | <input type="radio"/> Recreatief    |
| 11 |        | Hockey                                                                                                                                                                                   |                                     |
| 12 |        |                                                                                                                                                                                          |                                     |
| 13 |        |                                                                                                                                                                                          |                                     |
| 14 | 4.1.8  | <b>If 'Wat is het meest bij u van toepassing ten aanzien van uw acitiviteit?' is equal to 'Korfbal' answer this question:</b>                                                            | <input type="radio"/> Professioneel |
| 15 |        |                                                                                                                                                                                          | <input type="radio"/> Competitief   |
| 16 |        |                                                                                                                                                                                          | <input type="radio"/> Recreatief    |
| 17 |        | Korfbal                                                                                                                                                                                  |                                     |
| 18 |        |                                                                                                                                                                                          |                                     |
| 19 |        |                                                                                                                                                                                          |                                     |
| 20 | 4.1.9  | <b>If 'Wat is het meest bij u van toepassing ten aanzien van uw acitiviteit?' is equal to 'Gevechtssporten: judo, karate, kung fu, taekwando, jiu jitsu, etc.' answer this question:</b> | <input type="radio"/> Professioneel |
| 21 |        |                                                                                                                                                                                          | <input type="radio"/> Competitief   |
| 22 |        |                                                                                                                                                                                          | <input type="radio"/> Recreatief    |
| 23 |        | Gevechtssporten: judo, karate, kung fu, taekwando, jiu                                                                                                                                   |                                     |
| 24 |        | jitsu, etc.                                                                                                                                                                              |                                     |
| 25 |        |                                                                                                                                                                                          |                                     |
| 26 |        |                                                                                                                                                                                          |                                     |
| 27 | 4.1.10 | <b>If 'Wat is het meest bij u van toepassing ten aanzien van uw acitiviteit?' is equal to 'Oriëntatielopen' answer this question:</b>                                                    | <input type="radio"/> Professioneel |
| 28 |        |                                                                                                                                                                                          | <input type="radio"/> Competitief   |
| 29 |        |                                                                                                                                                                                          | <input type="radio"/> Recreatief    |
| 30 |        | Oriëntatielopen                                                                                                                                                                          |                                     |
| 31 |        |                                                                                                                                                                                          |                                     |
| 32 |        |                                                                                                                                                                                          |                                     |
| 33 | 4.1.11 | <b>If 'Wat is het meest bij u van toepassing ten aanzien van uw acitiviteit?' is equal to 'Rhythmische gymnastiek' answer this question:</b>                                             | <input type="radio"/> Professioneel |
| 34 |        |                                                                                                                                                                                          | <input type="radio"/> Competitief   |
| 35 |        |                                                                                                                                                                                          | <input type="radio"/> Recreatief    |
| 36 |        | Rhythmisch gymnastiek                                                                                                                                                                    |                                     |
| 37 |        |                                                                                                                                                                                          |                                     |
| 38 |        |                                                                                                                                                                                          |                                     |
| 39 | 4.1.12 | <b>If 'Wat is het meest bij u van toepassing ten aanzien van uw acitiviteit?' is equal to 'Volleybal' answer this question:</b>                                                          | <input type="radio"/> Professioneel |
| 40 |        |                                                                                                                                                                                          | <input type="radio"/> Competitief   |
| 41 |        |                                                                                                                                                                                          | <input type="radio"/> Recreatief    |
| 42 |        | Volleybal                                                                                                                                                                                |                                     |
| 43 |        |                                                                                                                                                                                          |                                     |
| 44 | 4.1.13 | <b>If 'Wat is het meest bij u van toepassing ten aanzien van uw acitiviteit?' is equal to 'Boxen' answer this question:</b>                                                              | <input type="radio"/> Professioneel |
| 45 |        |                                                                                                                                                                                          | <input type="radio"/> Competitief   |
| 46 |        |                                                                                                                                                                                          | <input type="radio"/> Recreatief    |
| 47 |        | Boxen                                                                                                                                                                                    |                                     |
| 48 |        |                                                                                                                                                                                          |                                     |
| 49 |        |                                                                                                                                                                                          |                                     |
| 50 | 4.1.14 | <b>If 'Wat is het meest bij u van toepassing ten aanzien van uw acitiviteit?' is equal to 'Freestyle snowboarden' answer this question:</b>                                              | <input type="radio"/> Professioneel |
| 51 |        |                                                                                                                                                                                          | <input type="radio"/> Competitief   |
| 52 |        |                                                                                                                                                                                          | <input type="radio"/> Recreatief    |
| 53 |        | Freestyle snowboarden                                                                                                                                                                    |                                     |
| 54 |        |                                                                                                                                                                                          |                                     |
| 55 |        |                                                                                                                                                                                          |                                     |
| 56 | 4.1.15 | <b>If 'Wat is het meest bij u van toepassing ten aanzien van uw acitiviteit?' is equal to 'Freestyle snowboarden' answer this question:</b>                                              | <input type="radio"/> Professioneel |
| 57 |        |                                                                                                                                                                                          | <input type="radio"/> Competitief   |
| 58 |        |                                                                                                                                                                                          | <input type="radio"/> Recreatief    |
| 59 |        | IJshockey                                                                                                                                                                                |                                     |
| 60 |        |                                                                                                                                                                                          |                                     |



- 1  
2  
3  
4  
5  
6  
7
- 4.1.16 ***If 'Wat is het meest bij u van toepassing ten aanzien van uw acitiviteit?' is equal to 'Tennis' answer this question:***  
Tennis  Professioneel  
 Competitief  
 Recreatief
- 8  
9  
10  
11  
12
- 4.1.17 ***If 'Wat is het meest bij u van toepassing ten aanzien van uw acitiviteit?' is equal to 'Worstelen' answer this question:***  
Worstelen  Professioneel  
 Competitief  
 Recreatief
- 13  
14  
15  
16  
17  
18
- 4.1.18 ***If 'Wat is het meest bij u van toepassing ten aanzien van uw acitiviteit?' is equal to 'Fitness, aerobics' answer this question:***  
Fitness, aerobics  Professioneel  
 Competitief  
 Recreatief
- 19  
20  
21  
22  
23  
24
- 4.1.19 ***If 'Wat is het meest bij u van toepassing ten aanzien van uw acitiviteit?' is equal to 'Badminton' answer this question:***  
Badminton  Professioneel  
 Competitief  
 Recreatief
- 25  
26  
27  
28  
29  
30
- 4.1.20 ***If 'Wat is het meest bij u van toepassing ten aanzien van uw acitiviteit?' is equal to 'Baseball' answer this question:***  
Baseball  Professioneel  
 Competitief  
 Recreatief
- 31  
32  
33  
34  
35
- 4.1.21 ***If 'Wat is het meest bij u van toepassing ten aanzien van uw acitiviteit?' is equal to 'Cross-country hardlopen' answer this question:***  
Cross-country hardlopen  Professioneel  
 Competitief  
 Recreatief
- 36  
37  
38  
39  
40  
41
- 4.1.22 ***If 'Wat is het meest bij u van toepassing ten aanzien van uw acitiviteit?' is equal to 'Moderne pentathlon' answer this question:***  
Moderne pentathlon  Professioneel  
 Competitief  
 Recreatief
- 42  
43  
44  
45  
46  
47
- 4.1.23 ***If 'Wat is het meest bij u van toepassing ten aanzien van uw acitiviteit?' is equal to 'Squash' answer this question:***  
Squash  Professioneel  
 Competitief  
 Recreatief
- 48  
49  
50  
51  
52  
53
- 4.1.24 ***If 'Wat is het meest bij u van toepassing ten aanzien van uw acitiviteit?' is equal to 'Surfen, windsurfen' answer this question:***  
Surfen, windsurfen  Professioneel  
 Competitief  
 Recreatief
- 54  
55  
56  
57  
58  
59  
60
- 4.1.25 ***If 'Wat is het meest bij u van toepassing ten aanzien van uw acitiviteit?' is equal to 'Tafel tennis' answer this question:***  
Tafel tennis  Professioneel  
 Competitief  
 Recreatief

- 1  
2  
3  
4  
5  
6  
7
- 4.1.26 **If 'Wat is het meest bij u van toepassing ten aanzien van uw acitiviteit?' is equal to 'Atletiek: spring-, werponderdelen' answer this question:**  
Atletiek: spring-, werponderdelen
- Professioneel  
 Competitief  
 Recreatief
- 
- 8  
9  
10  
11  
12
- 4.1.27 **If 'Wat is het meest bij u van toepassing ten aanzien van uw acitiviteit?' is equal to 'Waterskieën' answer this question:**  
Waterskien
- Professioneel  
 Competitief  
 Recreatief
- 
- 13  
14  
15  
16  
17  
18
- 4.1.28 **If 'Wat is het meest bij u van toepassing ten aanzien van uw acitiviteit?' is equal to 'Dans' answer this question:**  
Dans
- Professioneel  
 Competitief  
 Recreatief
- 
- 19  
20  
21  
22  
23  
24
- 4.1.29 **If 'Wat is het meest bij u van toepassing ten aanzien van uw acitiviteit?' is equal to 'Schermen' answer this question:**  
Schermen
- Professioneel  
 Competitief  
 Recreatief
- 
- 25  
26  
27  
28  
29  
30
- 4.1.30 **If 'Wat is het meest bij u van toepassing ten aanzien van uw acitiviteit?' is equal to 'Zaalhockey' answer this question:**  
Zaalhockey
- Professioneel  
 Competitief  
 Recreatief
- 
- 31  
32  
33  
34  
35
- 4.1.31 **If 'Wat is het meest bij u van toepassing ten aanzien van uw acitiviteit?' is equal to 'Bergbeklimmen' answer this question:**  
Bergbeklimmen
- Professioneel  
 Competitief  
 Recreatief
- 
- 36  
37  
38  
39  
40  
41
- 4.1.32 **If 'Wat is het meest bij u van toepassing ten aanzien van uw acitiviteit?' is equal to 'Langlauf' answer this question:**  
Langlauf
- Professioneel  
 Competitief  
 Recreatief
- 
- 42  
43  
44  
45  
46  
47
- 4.1.33 **If 'Wat is het meest bij u van toepassing ten aanzien van uw acitiviteit?' is equal to 'Parachute springen' answer this question:**  
Parachute springen
- Professioneel  
 Competitief  
 Recreatief
- 
- 48  
49  
50  
51  
52  
53  
54  
55  
56  
57  
58  
59  
60
- 4.1.34 **If 'Wat is het meest bij u van toepassing ten aanzien van uw acitiviteit?' is equal to 'Softball' answer this question:**  
Softball
- Professioneel  
 Competitief  
 Recreatief

- 1  
2  
3  
4  
5  
6  
7  
8  
9  
10  
11  
12
- 4.1.35 **If 'Wat is het meest bij u van toepassing ten aanzien van uw activiteit?' is equal to 'Speciale beroepen en werkactiviteiten; speciale beroepen: ballet, professioneel soldaat, speciale reddingswerker, stuntman, etc.' answer this question:**  
Speciale beroepen en werkactiviteiten speciale beroepen: ballet, professioneel soldaat, speciale reddingswerker, stuntman, etc.
- ballet, professioneel soldaat, speciale reddingswerker, stuntman, etc.
- 
- 13  
14  
15  
16  
17
- 4.1.36 **If 'Wat is het meest bij u van toepassing ten aanzien van uw activiteit?' is equal to 'Duiken' answer this question:**  
Duiken
- Professioneel/competitief  
 Recreatief
- 
- 18  
19  
20  
21  
22
- 4.1.37 **If 'Wat is het meest bij u van toepassing ten aanzien van uw activiteit?' is equal to 'Scubaduiken' answer this question:**  
Scubaduiken
- Professioneel/competitief  
 Recreatief
- 
- 23  
24  
25  
26  
27  
28
- 4.1.38 **If 'Wat is het meest bij u van toepassing ten aanzien van uw activiteit?' is equal to 'Skaten, in-line skaten' answer this question:**  
skaten, in-linen skaten
- Professioneel/competitief  
 Recreatief
- 
- 29  
30  
31  
32  
33
- 4.1.39 **If 'Wat is het meest bij u van toepassing ten aanzien van uw activiteit?' is equal to 'Atletiek: looponderdelen' answer this question:**  
Atletiek: looponderdelen
- Professioneel/competitief  
 Recreatief
- 
- 34  
35  
36  
37  
38
- 4.1.40 **If 'Wat is het meest bij u van toepassing ten aanzien van uw activiteit?' is equal to 'Triatlon' answer this question:**  
triatlon
- Professioneel/competitief  
 Recreatief
- 
- 39  
40  
41  
42  
43  
44  
45
- 4.1.41 **If 'Wat is het meest bij u van toepassing ten aanzien van uw activiteit?' is equal to 'Gewichtsheffen, body-building' answer this question:**  
Gewichtsheffen, body-building
- Professioneel/competitief  
 Recreatief
- 
- 46  
47  
48  
49  
50  
51  
52
- 4.1.42 **If 'Wat is het meest bij u van toepassing ten aanzien van uw activiteit?' is equal to 'Alle competitieve sporten hieronder met 'seasonal' conditioning' answer this question:**  
Alle competitieve sporten hieronder met 'seasonal' conditioning
- Alle competitieve sporten hieronder met 'seasonal' conditioning
- 
- 53  
54  
55  
56  
57  
58  
59  
60
- 4.1.43 **If 'Wat is het meest bij u van toepassing ten aanzien van uw activiteit?' is equal to 'Zwaar fysiek werk' answer this question:**  
Zwaar fysiek werk
- Alle competitieve sporten hieronder met 'seasonal' conditioning

- 1  
2  
3  
4  
5  
6  
7  
8  
9  
10  
11  
12  
13  
14  
15  
16  
17  
18  
19  
20  
21  
22  
23  
24  
25  
26  
27  
28  
29  
30  
31  
32  
33  
34  
35  
36  
37  
38  
39  
40  
41  
42  
43  
44  
45  
46  
47  
48  
49  
50  
51  
52  
53  
54  
55  
56  
57  
58  
59  
60
- 
- 4.1.44 ***If 'Wat is het meest bij u van toepassing ten aanzien van uw acitiviteit?' is equal to 'Alpine skiën en snowboarden' answer this question:***  
Alpine skien en snowboarden  Alpine skien en snowboarden
- 
- 4.1.45 ***If 'Wat is het meest bij u van toepassing ten aanzien van uw acitiviteit?' is equal to 'Bowlen/curlen' answer this question:***  
Bowlen/curlen  Bowlen/curlen
- 
- 4.1.46 ***If 'Wat is het meest bij u van toepassing ten aanzien van uw acitiviteit?' is equal to 'Golf' answer this question:***  
Golf  Golf
- 
- 4.1.47 ***If 'Wat is het meest bij u van toepassing ten aanzien van uw acitiviteit?' is equal to 'Mountainbike/BMX' answer this question:***  
Mountainbike/BMX  Mountainbike/BMX
- 
- 4.1.48 ***If 'Wat is het meest bij u van toepassing ten aanzien van uw acitiviteit?' is equal to 'Powerliften' answer this question:***  
Powerliften  Powerliften
- 
- 4.1.49 ***If 'Wat is het meest bij u van toepassing ten aanzien van uw acitiviteit?' is equal to 'Zeilen' answer this question:***  
Zeilen  Zeilen
- 
- 4.1.50 ***If 'Wat is het meest bij u van toepassing ten aanzien van uw acitiviteit?' is equal to 'Fysiek werk' answer this question:***  
Fysiek werk  Fysiek werk
- 
- 4.1.51 ***If 'Wat is het meest bij u van toepassing ten aanzien van uw acitiviteit?' is equal to 'Wielrennen' answer this question:***  
Wielrennen  Wielrennen
- 
- 4.1.52 ***If 'Wat is het meest bij u van toepassing ten aanzien van uw acitiviteit?' is equal to 'Paardrijden' answer this question:***  
Paardrijden  Paardrijden
- 
- 4.1.53 ***If 'Wat is het meest bij u van toepassing ten aanzien van uw acitiviteit?' is equal to 'Motorsporten/technische sporten' answer this question:***  
Motorsporten/technische sporten  Motorsporten/technische sporten
- 
- 4.1.54 ***If 'Wat is het meest bij u van toepassing ten aanzien van uw acitiviteit?' is equal to 'Roeien, kayakken' answer this question:***  
Roeien, kayakken  Roeien, kayakken

|        |                                                                                                                                                                                                                                                                                    |                                                                                                    |
|--------|------------------------------------------------------------------------------------------------------------------------------------------------------------------------------------------------------------------------------------------------------------------------------------|----------------------------------------------------------------------------------------------------|
| 4.1.55 | <b>If 'Wat is het meest bij u van toepassing ten aanzien van uw acitiviteit?' is equal to 'Boogschieten' answer this question:</b><br>Boogschieten                                                                                                                                 | <input type="radio"/> Boogschieten                                                                 |
| 4.1.56 | <b>If 'Wat is het meest bij u van toepassing ten aanzien van uw acitiviteit?' is equal to 'Water polo en zwemmen' answer this question:</b><br>Water polo en zwemmen                                                                                                               | <input type="radio"/> Water polo en zwemmen                                                        |
| 4.1.57 | <b>If 'Wat is het meest bij u van toepassing ten aanzien van uw acitiviteit?' is equal to 'Kunnen lopen op oneven grond' answer this question:</b><br>Kunnen lopen op oneven grond                                                                                                 | <input type="radio"/> Kunnen lopen op oneven grond                                                 |
| 4.1.58 | <b>If 'Wat is het meest bij u van toepassing ten aanzien van uw acitiviteit?' is equal to 'Geen sport, echter geen limitatie in dagelijkse activiteiten' answer this question:</b><br>Geen sport, echter geen limitatie in dagelijkse activiteiten                                 | <input type="radio"/> Geen sport, echter geen limitatie in dagelijkse activiteiten                 |
| 4.1.59 | <b>If 'Wat is het meest bij u van toepassing ten aanzien van uw acitiviteit?' is equal to 'Kunnen lopen op even grond, maar de dagelijkse activiteiten zijn gelimiteerd' answer this question:</b><br>Kunnen lopen op even grond, maar de dagelijkse activiteiten zijn gelimiteerd | <input type="radio"/> Kunnen lopen op even grond, maar de dagelijkse activiteiten zijn gelimiteerd |
| 4.1.60 | <b>If 'Wat is het meest bij u van toepassing ten aanzien van uw acitiviteit?' is equal to 'Niet kunnen lopen, fysieke handicap wegens enkelproblemen' answer this question:</b><br>Niet kunnen lopen, fysieke handicap wegens enkelproblemen                                       | <input type="radio"/> Niet kunnen lopen, fysieke handicap wegens enkelproblemen                    |

## Vragenlijst PRIMA studie 12 weken - Hoe tevreden bent u over de enkelklachten?

| Number | Question                                   | Answers                                                                                                                       |
|--------|--------------------------------------------|-------------------------------------------------------------------------------------------------------------------------------|
| 5.1    | Hoe tevreden bent u over de enkelklachten? | <input type="radio"/> Slecht<br><input type="radio"/> Matig<br><input type="radio"/> Goed<br><input type="radio"/> Uitstekend |

## Vragenlijst PRIMA studie 12 weken - SF-36

| Number | Question                                                                                                                                                                                                                                                                                                                                                           | Answers                                                                                                                                                                                                                                                                                                                                                                 |
|--------|--------------------------------------------------------------------------------------------------------------------------------------------------------------------------------------------------------------------------------------------------------------------------------------------------------------------------------------------------------------------|-------------------------------------------------------------------------------------------------------------------------------------------------------------------------------------------------------------------------------------------------------------------------------------------------------------------------------------------------------------------------|
|        | Deze vragenlijst gaat over uw standpunten t.a.v. uw gezondheid. Met behulp van deze gegevens kan worden bijgehouden hoe u zich voelt en hoe goed u in staat bent uw gebruikelijke bezigheden uit te voeren. Beantwoord elke vraag door een antwoord aan te klikken. Als u niet zeker weet hoe u een vraag moet beantwoorden, geef dan het best mogelijke antwoord. |                                                                                                                                                                                                                                                                                                                                                                         |
| 6.1    | Hoe zou u over het algemeen uw gezondheid noemen?                                                                                                                                                                                                                                                                                                                  | <input type="radio"/> Uitstekend <input type="radio"/> Zeer goed <input type="radio"/><br><input type="radio"/> Goed <input type="radio"/> Matig <input type="radio"/> Slecht                                                                                                                                                                                           |
| 6.2    | Hoe beoordeelt u nu uw gezondheid over het algemeen vergeleken met een jaar geleden?                                                                                                                                                                                                                                                                               | <input type="radio"/> Veel beter dan een jaar geleden <input type="radio"/><br><input type="radio"/> Wat beter dan een jaar geleden <input type="radio"/><br><input type="radio"/> Ongeveer hetzelfde als een jaar geleden<br><input type="radio"/> Wat slechter dan een jaar geleden <input type="radio"/><br><input type="radio"/> Veel slechter dan een jaar geleden |
| 6.3    | Wordt u door uw gezondheid op dit moment beperkt bij forse inspanning, zoals hardlopen, tillen van zware voorwerpen of een veeleisende sport beoefenen?                                                                                                                                                                                                            | <input type="radio"/> Ja, ernstig beperkt <input type="radio"/> Ja, een beetje beperkt <input type="radio"/> Nee, helemaal niet beperkt                                                                                                                                                                                                                                 |
| 6.4    | Wordt u door uw gezondheid op dit moment beperkt bij matige inspanning zoals een tafel verplaatsen, stofzuigen, zwemmen of fietsen?                                                                                                                                                                                                                                | <input type="radio"/> Ja, ernstig beperkt <input type="radio"/> Ja, een beetje beperkt <input type="radio"/> Nee, helemaal niet beperkt                                                                                                                                                                                                                                 |
| 6.5    | Wordt u door uw gezondheid op dit moment beperkt bij boodschappen tillen of dragen?                                                                                                                                                                                                                                                                                | <input type="radio"/> Ja, ernstig beperkt <input type="radio"/> Ja, een beetje beperkt <input type="radio"/> Nee, helemaal niet beperkt                                                                                                                                                                                                                                 |
| 6.6    | Wordt u door uw gezondheid op dit moment beperkt bij een paar trappen oplopen?                                                                                                                                                                                                                                                                                     | <input type="radio"/> Ja, ernstig beperkt <input type="radio"/> Ja, een beetje beperkt <input type="radio"/> Nee, helemaal niet beperkt                                                                                                                                                                                                                                 |
| 6.7    | Wordt u door uw gezondheid op dit moment beperkt bij één trap oplopen?                                                                                                                                                                                                                                                                                             | <input type="radio"/> Ja, ernstig beperkt <input type="radio"/> Ja, een beetje beperkt <input type="radio"/> Nee, helemaal niet beperkt                                                                                                                                                                                                                                 |
| 6.8    | Wordt u door uw gezondheid op dit moment beperkt bij bukken, knielen of hurken?                                                                                                                                                                                                                                                                                    | <input type="radio"/> Ja, ernstig beperkt <input type="radio"/> Ja, een beetje beperkt <input type="radio"/> Nee, helemaal niet beperkt                                                                                                                                                                                                                                 |
| 6.9    | Wordt u door uw gezondheid op dit moment beperkt bij meer dan één kilometer lopen?                                                                                                                                                                                                                                                                                 | <input type="radio"/> Ja, ernstig beperkt <input type="radio"/> Ja, een beetje beperkt <input type="radio"/> Nee, helemaal niet beperkt                                                                                                                                                                                                                                 |
| 6.10   | Wordt u door uw gezondheid op dit moment beperkt bij een paar honderd meter lopen?                                                                                                                                                                                                                                                                                 | <input type="radio"/> Ja, ernstig beperkt <input type="radio"/> Ja, een beetje beperkt <input type="radio"/> Nee, helemaal niet beperkt                                                                                                                                                                                                                                 |

- 1  
2  
3  
4  
5  
6  
7  
8  
9  
10  
11  
12  
13  
14  
15  
16  
17  
18  
19  
20  
21  
22  
23  
24  
25  
26  
27  
28  
29  
30  
31  
32  
33  
34  
35  
36  
37  
38  
39  
40  
41  
42  
43  
44  
45  
46  
47  
48  
49  
50  
51  
52  
53  
54  
55  
56  
57  
58  
59  
60
- 
- 6.11 Wordt u door uw gezondheid op dit moment beperkt bij ongeveer honderd meter lopen?  Ja, ernstig beperkt  Ja, een beetje beperkt  Nee, helemaal niet beperkt
- 
- 6.12 Wordt u door uw gezondheid op dit moment beperkt bij uzelf wassen of aankleden?  Ja, ernstig beperkt  Ja, een beetje beperkt  Nee, helemaal niet beperkt
- 
- 6.13 U besteedde in de afgelopen 4 weken minder tijd aan werk of andere bezigheden  Ja  Nee
- 
- 6.14 U heeft in de afgelopen 4 weken minder bereikt dan u zou willen  Ja  Nee
- 
- 6.15 U was in de afgelopen 4 weken beperkt in het soort werk of andere bezigheden.  Ja  Nee
- 
- 6.16 U had de afgelopen 4 weken moeite om uw werk of andere bezigheden uit te voeren (het kostte u bijvoorbeeld extra inspanning).  Ja  Nee
- 
- 6.17 U besteedde in de afgelopen 4 weken minder tijd aan werk of andere bezigheden ten gevolge van emotionele problemen  Ja  Nee
- 
- 6.18 U heeft in de afgelopen 4 weken minder bereikt dan u zou willen ten gevolge van emotionele problemen.  Ja  Nee
- 
- 6.19 U deed de afgelopen 4 weken uw werk of andere bezigheden niet zo zorgvuldig als gewoonlijk ten gevolge van emotionele problemen.  Ja  Nee
- 
- 6.20 In hoeverre hebben uw lichamelijke gezondheid of emotionele problemen u gedurende de afgelopen 4 weken gehinderd in uw normale omgang met familie, vrienden of burens, of bij activiteiten in groepsverband?  Helemaal niet  Enigszins  Nogal  Veel  Heel erg veel
- 
- 6.21 Hoeveel lichamelijke pijn heeft u de afgelopen 4 weken gehad?  Geen  Heel licht  Licht  Nogal  Ernstig  Heel ernstig
- 
- 6.22 In welke mate bent u de afgelopen 4 weken door de pijn gehinderd in uw normale werk (zowel werk buitenshuis als huishoudelijk werk)?  Helemaal niet  Een klein beetje  Nogal  Veel  Heel erg veel

1  
2 6.23 Voelde u zich levenslustig?  Altijd  
3  Meestal  
4  Vaak  
5  Soms  
6  Zelden  
7  Nooit  
8  
9  
10

---

11 6.24 Was u erg zenuwachtig?  Altijd  
12  Meestal  
13  Vaak  
14  Soms  
15  Zelden  
16  Nooit  
17  
18  
19  
20

---

21 6.25 Zat u zo in de put dat u niets kon?  Altijd  
22  Meestal  
23  Vaak  
24  Soms  
25  Zelden  
26  Nooit  
27  
28  
29  
30

---

31 6.26 Voelde u zich rustig en tevreden?  Altijd  
32  Meestal  
33  Vaak  
34  Soms  
35  Zelden  
36  Nooit  
37  
38  
39  
40

---

41 6.27 Had u veel energie?  Altijd  
42  Meestal  
43  Vaak  
44  Soms  
45  Zelden  
46  Nooit  
47  
48  
49  
50

---

51 6.28 Voelde u zich somber en neerslachtig?  Altijd  
52  Meestal  
53  Vaak  
54  Soms  
55  Zelden  
56  Nooit  
57  
58  
59  
60



- 1  
2  
3  
4  
5  
6  
7  
8  
9  
10
- 
- 11  
12 6.29 Voelde u zich uitgeput?  Altijd  
13  Meestal  
14  Vaak  
15  Soms  
16  Zelden  
17  Nooit
- 
- 18  
19  
20  
21  
22 6.30 Was u een gelukkig mens?  Altijd  
23  Meestal  
24  Vaak  
25  Soms  
26  Zelden  
27  Nooit
- 
- 28  
29  
30  
31 6.31 Voelde u zich moe?  Altijd  
32  Meestal  
33  Vaak  
34  Soms  
35  Zelden  
36  Nooit
- 
- 37  
38  
39 6.32 Hoe vaak hebben uw lichamelijke gezondheid of  
40 emotionele problemen u gedurende de afgelopen 4  
41 weken gehinderd bij uw sociale activiteiten (zoals  
42 vrienden of familie bezoeken etc.)?  Altijd  
43  Meestal  
44  Soms  
45  Zelden  
46  Nooit
- 
- 47  
48 6.33 Ik lijk wat gemakkelijker ziek te worden dan andere  
49 mensen  Volkomen juist  
50  Grotendeels juist  
51  Weet ik niet  
52  Grotendeels onjuist  
53  Volkomen onjuist
- 
- 54  
55 6.34 Ik ben even gezond als andere mensen die ik ken  Volkomen juist  
56  Grotendeels juist  
57  Weet ik niet  
58  Grotendeels onjuist  
59  Volkomen onjuist  
60

- 1  
2  
3  
4  
5  
6  
7  
8  
9
- 
- 6.35 Ik verwacht dat mijn gezondheid achteruit zal gaan
- Volkomen juist
  - Grotendeels juist
  - Weet ik niet
  - Grotendeels onjuist
  - Volkomen onjuist
- 

- 10  
11  
12  
13  
14  
15  
16  
17  
18  
19  
20  
21  
22
- 6.36 Mijn gezondheid is uitstekend
- Volkomen juist
  - Grotendeels juist
  - Weet ik niet
  - Grotendeels onjuist
  - Volkomen onjuist

## Vragenlijst PRIMA studie 12 weken - GAS

| Number | Question                                                                                                                                                                                  | Answers                                                                                                                                                                                                                                                                                                                                                              |
|--------|-------------------------------------------------------------------------------------------------------------------------------------------------------------------------------------------|----------------------------------------------------------------------------------------------------------------------------------------------------------------------------------------------------------------------------------------------------------------------------------------------------------------------------------------------------------------------|
|        | Tijdens de eerste afspraak werd een duidelijk doel met u afgesproken. Dit werd tevens per email naar u gestuurd. Hoe is de situatie nu ten aanzien van de destijds gestelde doelstelling? |                                                                                                                                                                                                                                                                                                                                                                      |
| 7.1    | Wat is nu de situatie ten aanzien van het tijdens de eerste afspraak afgesproken doelstelling (Goal attainment Scaling)?                                                                  | <ul style="list-style-type: none"> <li><input type="radio"/> Achteruitgang (minder dan de uitgangssituatie)</li> <li><input type="radio"/> Uitgangssituatie</li> <li><input type="radio"/> Minder dan het doel</li> <li><input type="radio"/> Doel</li> <li><input type="radio"/> Meer dan het doel</li> <li><input type="radio"/> Veel meer dan het doel</li> </ul> |

## Vragenlijst PRIMA studie 12 weken - EQ-5D-3L

| Number | Question                                                                                                                                                                                                                                                                                                                                                           | Answers                                                                                                                                                                                                                  |
|--------|--------------------------------------------------------------------------------------------------------------------------------------------------------------------------------------------------------------------------------------------------------------------------------------------------------------------------------------------------------------------|--------------------------------------------------------------------------------------------------------------------------------------------------------------------------------------------------------------------------|
|        | Deze vragenlijst gaat over uw standpunten t.a.v. uw gezondheid. Met behulp van deze gegevens kan worden bijgehouden hoe u zich voelt en hoe goed u in staat bent uw gebruikelijke bezigheden uit te voeren. Beantwoord elke vraag door een antwoord aan te klikken. Als u niet zeker weet hoe u een vraag moet beantwoorden, geef dan het best mogelijke antwoord. |                                                                                                                                                                                                                          |
| 8.1    | Hoe is het met uw Mobiliteit gesteld?                                                                                                                                                                                                                                                                                                                              | <ul style="list-style-type: none"> <li><input type="radio"/> Ik heb geen problemen met lopen</li> <li><input type="radio"/> Ik heb enige problemen met lopen</li> <li><input type="radio"/> Ik ben bedlegerig</li> </ul> |

1  
2  
3  
4  
5  
6  
7  
8  
9

8.2 Hoe is het met uw Zelfzorg gesteld?

Ik heb geen problemen om mijzelf te wassen of aan te kleden

Ik heb enige problemen om mijzelf te wassen of aan te kleden

Ik ben niet in staat om mijzelf te wassen of aan te kleden

10  
11  
12  
13  
14  
15  
16  
17  
18  
19

8.3 Hoe is het met de Dagelijkse activiteiten (werk, studie, huishouden, gezins- en vrijetijdsactiviteiten) gesteld?

Ik heb geen problemen met mijn dagelijkse activiteiten

Ik heb enige problemen met mijn dagelijkse activiteiten

Ik ben niet in staat om mijn dagelijkse activiteiten uit te voeren

20  
21  
22  
23  
24  
25  
26

8.4 Hoe is het met de Pijn/klachten gesteld?

Ik heb geen pijn of andere klachten

Ik heb matige pijn of andere klachten

Ik heb zeer ernstige pijn of andere klachten

27  
28  
29  
30  
31

8.5 Hoe is het met de Stemming gesteld?

Ik ben niet angstig of somber

Ik ben matig angstig of somber

Ik ben erg angstig of somber

32  
33  
34  
35  
36

We willen weten hoe goed of slecht uw gezondheid VANDAAG is. Deze meetschaal loopt van 0 tot 100: 100 staat voor de BESTE gezondheid die u zich kunt voorstellen - 0 staat voor de SLECHTSTE gezondheid die u zich kunt voorstellen

37  
38  
39  
40  
41  
42

8.6 Uw Gezondheid vandaag (0.00) (100.00)

## Vragenlijst PRIMA studie 12 weken - AOS

| Number | Question                                                                                                                                                                                                                                                                                                                                                                                                      | Answers                                                                                            |
|--------|---------------------------------------------------------------------------------------------------------------------------------------------------------------------------------------------------------------------------------------------------------------------------------------------------------------------------------------------------------------------------------------------------------------|----------------------------------------------------------------------------------------------------|
|        | Instructies: De lijn naast elke vraag staat voor hoeveel PIJN u heeft in verschillende situaties. De linker kant (0) is "geen pijn" en de rechter kant (100) is "ergste pijn denkbaar". Geef voor de onderstaande situaties op de lijn aan hoeveel PIJN u in de afgelopen week in de enkel had. Als een of meerdere van deze situaties niet van toepassing waren, dan kiest u de "niet van toepassing" optie. |                                                                                                    |
| 9.1    | Wat was de hoogte van de ergste pijn in de afgelopen week?                                                                                                                                                                                                                                                                                                                                                    | (0.00) (100.00)                                                                                    |
| 9.2    | Heeft u pijn als u 's ochtends opstaat?                                                                                                                                                                                                                                                                                                                                                                       | <input type="radio"/> Ja<br><input type="radio"/> Nee<br><input type="radio"/> Niet van toepassing |

|    |       |                                                                                                                     |                                           |
|----|-------|---------------------------------------------------------------------------------------------------------------------|-------------------------------------------|
| 1  |       |                                                                                                                     |                                           |
| 2  | 9.2.1 | <b><i>If 'Heeft u pijn als u 's ochtends opstaat?' is equal to 'Ja' answer this question:</i></b>                   | (0.00) (100.00)                           |
| 3  |       | Hoeveel pijn heeft u voordat u 's ochtends opstaat?                                                                 |                                           |
| 4  |       |                                                                                                                     |                                           |
| 5  |       |                                                                                                                     |                                           |
| 6  | 9.3   | Heeft u pijn wanneer u op blote voeten loopt?                                                                       | <input type="radio"/> Ja                  |
| 7  |       |                                                                                                                     | <input type="radio"/> Nee                 |
| 8  |       |                                                                                                                     | <input type="radio"/> Niet van toepassing |
| 9  |       |                                                                                                                     |                                           |
| 10 |       |                                                                                                                     |                                           |
| 11 |       |                                                                                                                     |                                           |
| 12 | 9.3.1 | <b><i>If 'Heeft u pijn wanneer u op blote voeten loopt?' is equal to 'Ja' answer this question:</i></b>             | (0.00) (100.00)                           |
| 13 |       | Hoeveel pijn heeft u als u op blote voeten loopt?                                                                   |                                           |
| 14 |       |                                                                                                                     |                                           |
| 15 |       |                                                                                                                     |                                           |
| 16 | 9.4   | Heeft u pijn wanneer u op blote voeten staat?                                                                       | <input type="radio"/> Ja                  |
| 17 |       |                                                                                                                     | <input type="radio"/> Nee                 |
| 18 |       |                                                                                                                     | <input type="radio"/> Niet van toepassing |
| 19 |       |                                                                                                                     |                                           |
| 20 |       |                                                                                                                     |                                           |
| 21 |       |                                                                                                                     |                                           |
| 22 | 9.4.1 | <b><i>If 'Heeft u pijn wanneer u op blote voeten staat?' is equal to 'Ja' answer this question:</i></b>             | (0.00) (100.00)                           |
| 23 |       | Hoeveel pijn heeft u als u op blote voeten staat?                                                                   |                                           |
| 24 |       |                                                                                                                     |                                           |
| 25 |       |                                                                                                                     |                                           |
| 26 | 9.5   | Heeft u pijn wanneer u met schoenen loopt?                                                                          | <input type="radio"/> Ja                  |
| 27 |       |                                                                                                                     | <input type="radio"/> Nee                 |
| 28 |       |                                                                                                                     | <input type="radio"/> Niet van toepassing |
| 29 |       |                                                                                                                     |                                           |
| 30 |       |                                                                                                                     |                                           |
| 31 |       |                                                                                                                     |                                           |
| 32 | 9.5.1 | <b><i>If 'Heeft u pijn wanneer u met schoenen loopt?' is equal to 'Ja' answer this question:</i></b>                | (0.00) (100.00)                           |
| 33 |       | Hoeveel pijn heeft u wanneer u met schoenen loopt?                                                                  |                                           |
| 34 |       |                                                                                                                     |                                           |
| 35 |       |                                                                                                                     |                                           |
| 36 | 9.6   | Heeft u pijn wanneer u met schoenen staat?                                                                          | <input type="radio"/> Ja                  |
| 37 |       |                                                                                                                     | <input type="radio"/> Nee                 |
| 38 |       |                                                                                                                     | <input type="radio"/> Niet van toepassing |
| 39 |       |                                                                                                                     |                                           |
| 40 |       |                                                                                                                     |                                           |
| 41 |       |                                                                                                                     |                                           |
| 42 | 9.6.1 | <b><i>If 'Heeft u pijn wanneer u met schoenen staat?' is equal to 'Ja' answer this question:</i></b>                | (0.00) (100.00)                           |
| 43 |       | Hoeveel pijn heeft u wanneer u met schoenen staat?                                                                  |                                           |
| 44 |       |                                                                                                                     |                                           |
| 45 |       |                                                                                                                     |                                           |
| 46 | 9.7   | Heeft u pijn wanneer u loopt met steunzolen of een brace?                                                           | <input type="radio"/> Ja                  |
| 47 |       |                                                                                                                     | <input type="radio"/> Nee                 |
| 48 |       |                                                                                                                     | <input type="radio"/> Niet van toepassing |
| 49 |       |                                                                                                                     |                                           |
| 50 |       |                                                                                                                     |                                           |
| 51 |       |                                                                                                                     |                                           |
| 52 | 9.7.1 | <b><i>If 'Heeft u pijn wanneer u loopt met steunzolen of een brace?' is equal to 'Ja' answer this question:</i></b> | (0.00) (100.00)                           |
| 53 |       | Hoeveel pijn heeft u wanneer u loopt met steunzolen of een brace?                                                   |                                           |
| 54 |       |                                                                                                                     |                                           |
| 55 |       |                                                                                                                     |                                           |
| 56 |       |                                                                                                                     |                                           |
| 57 |       |                                                                                                                     |                                           |
| 58 |       |                                                                                                                     |                                           |
| 59 |       |                                                                                                                     |                                           |
| 60 |       |                                                                                                                     |                                           |

|    |        |                                                                                                                                                                                                                                                                                                                                                                                                                                               |                                                                                                    |          |
|----|--------|-----------------------------------------------------------------------------------------------------------------------------------------------------------------------------------------------------------------------------------------------------------------------------------------------------------------------------------------------------------------------------------------------------------------------------------------------|----------------------------------------------------------------------------------------------------|----------|
| 1  |        |                                                                                                                                                                                                                                                                                                                                                                                                                                               |                                                                                                    |          |
| 2  | 9.8    | Heeft u pijn wanneer u staat met steunzolen of een brace?                                                                                                                                                                                                                                                                                                                                                                                     | <input type="radio"/> Ja<br><input type="radio"/> Nee<br><input type="radio"/> Niet van toepassing |          |
| 3  |        |                                                                                                                                                                                                                                                                                                                                                                                                                                               |                                                                                                    |          |
| 4  |        |                                                                                                                                                                                                                                                                                                                                                                                                                                               |                                                                                                    |          |
| 5  |        |                                                                                                                                                                                                                                                                                                                                                                                                                                               |                                                                                                    |          |
| 6  |        |                                                                                                                                                                                                                                                                                                                                                                                                                                               |                                                                                                    |          |
| 7  |        |                                                                                                                                                                                                                                                                                                                                                                                                                                               |                                                                                                    |          |
| 8  | 9.8.1  | <b>If 'Heeft u pijn wanneer u staat met steunzolen of een brace?' is equal to 'Ja' answer this question:</b>                                                                                                                                                                                                                                                                                                                                  | (0.00)                                                                                             | (100.00) |
| 9  |        | Hoeveel pijn heeft u wanneer u staat met steunzolen of een brace?                                                                                                                                                                                                                                                                                                                                                                             |                                                                                                    |          |
| 10 |        |                                                                                                                                                                                                                                                                                                                                                                                                                                               |                                                                                                    |          |
| 11 |        |                                                                                                                                                                                                                                                                                                                                                                                                                                               |                                                                                                    |          |
| 12 |        |                                                                                                                                                                                                                                                                                                                                                                                                                                               |                                                                                                    |          |
| 13 | 9.9    | Heeft u pijn aan het einde van de dag?                                                                                                                                                                                                                                                                                                                                                                                                        | <input type="radio"/> Ja<br><input type="radio"/> Nee<br><input type="radio"/> Niet van toepassing |          |
| 14 |        |                                                                                                                                                                                                                                                                                                                                                                                                                                               |                                                                                                    |          |
| 15 |        |                                                                                                                                                                                                                                                                                                                                                                                                                                               |                                                                                                    |          |
| 16 |        |                                                                                                                                                                                                                                                                                                                                                                                                                                               |                                                                                                    |          |
| 17 |        |                                                                                                                                                                                                                                                                                                                                                                                                                                               |                                                                                                    |          |
| 18 |        |                                                                                                                                                                                                                                                                                                                                                                                                                                               |                                                                                                    |          |
| 19 | 9.9.1  | <b>If 'Heeft u pijn aan het einde van de dag?' is equal to 'Ja' answer this question:</b>                                                                                                                                                                                                                                                                                                                                                     | (0.00)                                                                                             | (100.00) |
| 20 |        | Hoeveel pijn heeft u aan het einde van de dag?                                                                                                                                                                                                                                                                                                                                                                                                |                                                                                                    |          |
| 21 |        |                                                                                                                                                                                                                                                                                                                                                                                                                                               |                                                                                                    |          |
| 22 |        |                                                                                                                                                                                                                                                                                                                                                                                                                                               |                                                                                                    |          |
| 23 |        | Instructies:De lijn naast elke vraag staat voor hoeveel MOEITE u heeft met verschillende activiteiten. De linker kant (0) is "Niet moeilijk" en de rechter kant (100) is "Te moeilijk, niet uitvoerbaar". Geef voor de onderstaande activiteiten op de lijn aan hoeveel MOEITE u in de afgelopen week door enkelklachten had met onderstaande activiteiten. Als een situatie niet van toepassing is, kies dan de optie "niet van toepassing". |                                                                                                    |          |
| 24 |        |                                                                                                                                                                                                                                                                                                                                                                                                                                               |                                                                                                    |          |
| 25 |        |                                                                                                                                                                                                                                                                                                                                                                                                                                               |                                                                                                    |          |
| 26 |        |                                                                                                                                                                                                                                                                                                                                                                                                                                               |                                                                                                    |          |
| 27 |        |                                                                                                                                                                                                                                                                                                                                                                                                                                               |                                                                                                    |          |
| 28 |        |                                                                                                                                                                                                                                                                                                                                                                                                                                               |                                                                                                    |          |
| 29 |        |                                                                                                                                                                                                                                                                                                                                                                                                                                               |                                                                                                    |          |
| 30 | 9.10   | Heeft u moeite met door het huis lopen?                                                                                                                                                                                                                                                                                                                                                                                                       | <input type="radio"/> Ja<br><input type="radio"/> Nee<br><input type="radio"/> Niet van toepassing |          |
| 31 |        |                                                                                                                                                                                                                                                                                                                                                                                                                                               |                                                                                                    |          |
| 32 |        |                                                                                                                                                                                                                                                                                                                                                                                                                                               |                                                                                                    |          |
| 33 |        |                                                                                                                                                                                                                                                                                                                                                                                                                                               |                                                                                                    |          |
| 34 |        |                                                                                                                                                                                                                                                                                                                                                                                                                                               |                                                                                                    |          |
| 35 | 9.10.1 | <b>If 'Heeft u moeite met door het huis lopen?' is equal to 'Ja' answer this question:</b>                                                                                                                                                                                                                                                                                                                                                    | (0.00)                                                                                             | (100.00) |
| 36 |        | Hoeveel moeite heeft u met door het huis lopen?                                                                                                                                                                                                                                                                                                                                                                                               |                                                                                                    |          |
| 37 |        |                                                                                                                                                                                                                                                                                                                                                                                                                                               |                                                                                                    |          |
| 38 |        |                                                                                                                                                                                                                                                                                                                                                                                                                                               |                                                                                                    |          |
| 39 |        |                                                                                                                                                                                                                                                                                                                                                                                                                                               |                                                                                                    |          |
| 40 | 9.11   | Heeft u moeite met buiten lopen op oneven ondergrond?                                                                                                                                                                                                                                                                                                                                                                                         | <input type="radio"/> Ja<br><input type="radio"/> Nee<br><input type="radio"/> Niet van toepassing |          |
| 41 |        |                                                                                                                                                                                                                                                                                                                                                                                                                                               |                                                                                                    |          |
| 42 |        |                                                                                                                                                                                                                                                                                                                                                                                                                                               |                                                                                                    |          |
| 43 |        |                                                                                                                                                                                                                                                                                                                                                                                                                                               |                                                                                                    |          |
| 44 |        |                                                                                                                                                                                                                                                                                                                                                                                                                                               |                                                                                                    |          |
| 45 | 9.11.1 | <b>If 'Heeft u moeite met buiten lopen op oneven ondergrond?' is equal to 'Ja' answer this question:</b>                                                                                                                                                                                                                                                                                                                                      | (0.00)                                                                                             | (100.00) |
| 46 |        | Hoeveel moeite heeft u met buiten lopen op oneven ondergrond?                                                                                                                                                                                                                                                                                                                                                                                 |                                                                                                    |          |
| 47 |        |                                                                                                                                                                                                                                                                                                                                                                                                                                               |                                                                                                    |          |
| 48 |        |                                                                                                                                                                                                                                                                                                                                                                                                                                               |                                                                                                    |          |
| 49 |        |                                                                                                                                                                                                                                                                                                                                                                                                                                               |                                                                                                    |          |
| 50 |        |                                                                                                                                                                                                                                                                                                                                                                                                                                               |                                                                                                    |          |
| 51 | 9.12   | Heeft u moeite met een paar honderd meter lopen?                                                                                                                                                                                                                                                                                                                                                                                              | <input type="radio"/> Ja<br><input type="radio"/> Nee<br><input type="radio"/> Niet van toepassing |          |
| 52 |        |                                                                                                                                                                                                                                                                                                                                                                                                                                               |                                                                                                    |          |
| 53 |        |                                                                                                                                                                                                                                                                                                                                                                                                                                               |                                                                                                    |          |
| 54 |        |                                                                                                                                                                                                                                                                                                                                                                                                                                               |                                                                                                    |          |
| 55 |        |                                                                                                                                                                                                                                                                                                                                                                                                                                               |                                                                                                    |          |
| 56 | 9.12.1 | <b>If 'Heeft u moeite met een paar honderd meter lopen?' is equal to 'Ja' answer this question:</b>                                                                                                                                                                                                                                                                                                                                           | (0.00)                                                                                             | (100.00) |
| 57 |        | Hoeveel moeite heeft u met een paar honderd meter lopen?                                                                                                                                                                                                                                                                                                                                                                                      |                                                                                                    |          |
| 58 |        |                                                                                                                                                                                                                                                                                                                                                                                                                                               |                                                                                                    |          |
| 59 |        |                                                                                                                                                                                                                                                                                                                                                                                                                                               |                                                                                                    |          |
| 60 |        |                                                                                                                                                                                                                                                                                                                                                                                                                                               |                                                                                                    |          |

|    |        |                                                                                                             |                                           |          |
|----|--------|-------------------------------------------------------------------------------------------------------------|-------------------------------------------|----------|
| 1  |        |                                                                                                             |                                           |          |
| 2  | 9.13   | Heeft u moeite met een trap oplopen?                                                                        | <input type="radio"/> Ja                  |          |
| 3  |        |                                                                                                             | <input type="radio"/> Nee                 |          |
| 4  |        |                                                                                                             | <input type="radio"/> Niet van toepassing |          |
| 5  |        |                                                                                                             |                                           |          |
| 6  |        |                                                                                                             |                                           |          |
| 7  |        |                                                                                                             |                                           |          |
| 8  | 9.13.1 | <b>If 'Heeft u moeite met een trap oplopen?' is equal to 'Ja' answer this question:</b>                     | (0.00)                                    | (100.00) |
| 9  |        | Hoeveel moeite heeft u met een trap oplopen?                                                                |                                           |          |
| 10 |        |                                                                                                             |                                           |          |
| 11 |        |                                                                                                             |                                           |          |
| 12 | 9.14   | Heeft u moeite met een trap aflopen?                                                                        | <input type="radio"/> Ja                  |          |
| 13 |        |                                                                                                             | <input type="radio"/> Nee                 |          |
| 14 |        |                                                                                                             | <input type="radio"/> Niet van toepassing |          |
| 15 |        |                                                                                                             |                                           |          |
| 16 |        |                                                                                                             |                                           |          |
| 17 |        |                                                                                                             |                                           |          |
| 18 | 9.14.1 | <b>If 'Heeft u moeite met een trap aflopen?' is equal to 'Ja' answer this question:</b>                     | (0.00)                                    | (100.00) |
| 19 |        | Hoeveel moeite heeft u met een trap aflopen?                                                                |                                           |          |
| 20 |        |                                                                                                             |                                           |          |
| 21 |        |                                                                                                             |                                           |          |
| 22 | 9.15   | Heeft u moeite met op de tenen staan?                                                                       | <input type="radio"/> Ja                  |          |
| 23 |        |                                                                                                             | <input type="radio"/> Nee                 |          |
| 24 |        |                                                                                                             | <input type="radio"/> Niet van toepassing |          |
| 25 |        |                                                                                                             |                                           |          |
| 26 |        |                                                                                                             |                                           |          |
| 27 |        |                                                                                                             |                                           |          |
| 28 | 9.15.1 | <b>If 'Heeft u moeite met op de tenen staan?' is equal to 'Ja' answer this question:</b>                    | (0.00)                                    | (100.00) |
| 29 |        | Hoeveel moeite heeft u met op de tenen staan?                                                               |                                           |          |
| 30 |        |                                                                                                             |                                           |          |
| 31 |        |                                                                                                             |                                           |          |
| 32 | 9.16   | Heeft u moeite met opstaan uit de stoel?                                                                    | <input type="radio"/> Ja                  |          |
| 33 |        |                                                                                                             | <input type="radio"/> Nee                 |          |
| 34 |        |                                                                                                             | <input type="radio"/> Niet van toepassing |          |
| 35 |        |                                                                                                             |                                           |          |
| 36 |        |                                                                                                             |                                           |          |
| 37 |        |                                                                                                             |                                           |          |
| 38 | 9.16.1 | <b>If 'Heeft u moeite met opstaan uit de stoel?' is equal to 'Ja' answer this question:</b>                 | (0.00)                                    | (100.00) |
| 39 |        | Hoeveel moeite heeft u met opstaan uit de stoel?                                                            |                                           |          |
| 40 |        |                                                                                                             |                                           |          |
| 41 |        |                                                                                                             |                                           |          |
| 42 | 9.17   | Heeft u moeite met het op- of afstappen van stoepranden?                                                    | <input type="radio"/> Ja                  |          |
| 43 |        |                                                                                                             | <input type="radio"/> Nee                 |          |
| 44 |        |                                                                                                             | <input type="radio"/> Niet van toepassing |          |
| 45 |        |                                                                                                             |                                           |          |
| 46 |        |                                                                                                             |                                           |          |
| 47 |        |                                                                                                             |                                           |          |
| 48 | 9.17.1 | <b>If 'Heeft u moeite met het op- of afstappen van stoepranden?' is equal to 'Ja' answer this question:</b> | (0.00)                                    | (100.00) |
| 49 |        | Hoeveel moeite heeft u met het op- of afstappen van stoepranden?                                            |                                           |          |
| 50 |        |                                                                                                             |                                           |          |
| 51 |        |                                                                                                             |                                           |          |
| 52 |        |                                                                                                             |                                           |          |
| 53 |        |                                                                                                             |                                           |          |
| 54 | 9.18   | Heeft u moeite met snel lopen of rennen?                                                                    | <input type="radio"/> Ja                  |          |
| 55 |        |                                                                                                             | <input type="radio"/> Nee                 |          |
| 56 |        |                                                                                                             | <input type="radio"/> Niet van toepassing |          |
| 57 |        |                                                                                                             |                                           |          |
| 58 |        |                                                                                                             |                                           |          |
| 59 |        |                                                                                                             |                                           |          |
| 60 |        |                                                                                                             |                                           |          |

9.18.1 ***If 'Heeft u moeite met snel lopen of rennen?' is equal to 'Ja' answer this question:*** (0.00) (100.00)  
 Hoeveel moeite heeft u met snel lopen of rennen?

## Vragenlijst PRIMA studie 12 weken - FAOS

| Number | Question                                                                                                                                                                                                                                                                                                                                                                                                                                                                                                                                                                            | Answers                                                                                                                                                    |
|--------|-------------------------------------------------------------------------------------------------------------------------------------------------------------------------------------------------------------------------------------------------------------------------------------------------------------------------------------------------------------------------------------------------------------------------------------------------------------------------------------------------------------------------------------------------------------------------------------|------------------------------------------------------------------------------------------------------------------------------------------------------------|
|        | Deze lijst vraagt naar uw mening over uw voet/enkel. Uw antwoorden geven ons een beeld van uw voet/enkel klachten en hoe u in staat bent om alledaagse activiteiten uit te voeren in uw huidige situatie. Beantwoorden van een vraag doet u door het aanklikken van een vakje met het volgens u meest juiste antwoord (één vakje per vraag). Als u niet zeker weet hoe u een vraag moet beantwoorden, geeft u dan het antwoord dat volgens u het meest op uw situatie van toepassing is. Deze vraag heeft betrekking op het voorkomen van voet/enkel klachten in de afgelopen week. |                                                                                                                                                            |
| 10.1   | Is uw voet/enkel gezwollen?                                                                                                                                                                                                                                                                                                                                                                                                                                                                                                                                                         | <input type="radio"/> Nooit <input type="radio"/> Zelden <input type="radio"/> Soms <input type="radio"/> Vaak <input type="radio"/> Altijd                |
| 10.2   | Voelt u gekraak of hoort u klikken of een ander vreemd geluid wanneer u de voet/enkel beweegt?                                                                                                                                                                                                                                                                                                                                                                                                                                                                                      | <input type="radio"/> Nooit <input type="radio"/> Zelden <input type="radio"/> Soms <input type="radio"/> Vaak <input type="radio"/> Altijd                |
| 10.3   | Hapert uw enkel of blokkeert uw enkel ('op slot' gaan zitten) wanneer u deze beweegt?                                                                                                                                                                                                                                                                                                                                                                                                                                                                                               | <input type="radio"/> Nooit <input type="radio"/> Zelden <input type="radio"/> Soms <input type="radio"/> Vaak <input type="radio"/> Altijd                |
| 10.4   | Kunt u de voet/enkel volledig strekken?                                                                                                                                                                                                                                                                                                                                                                                                                                                                                                                                             | <input type="radio"/> Altijd <input type="radio"/> Vaak <input type="radio"/> Soms <input type="radio"/> Zelden <input type="radio"/> Nooit                |
| 10.5   | Kunt u de voet volledig naar u toe buigen?                                                                                                                                                                                                                                                                                                                                                                                                                                                                                                                                          | <input type="radio"/> Altijd <input type="radio"/> Vaak <input type="radio"/> Soms <input type="radio"/> Zelden <input type="radio"/> Nooit                |
| 10.6   | In welke mate heeft u een stijf gevoel in de voet/enkel 's ochtends bij het wakker worden?                                                                                                                                                                                                                                                                                                                                                                                                                                                                                          | <input type="radio"/> Niet Ernstig <input type="radio"/> Mild <input type="radio"/> Matig <input type="radio"/> Zeer ernstig                               |
| 10.7   | In welke mate heeft u een stijf gevoel in de voet/enkel na zitten, liggen of rusten later op de dag?                                                                                                                                                                                                                                                                                                                                                                                                                                                                                | <input type="radio"/> Niet Ernstig <input type="radio"/> Mild <input type="radio"/> Matig <input type="radio"/> Zeer ernstig                               |
| 10.8   | Hoe vaak heeft u pijn in uw voet/enkel?                                                                                                                                                                                                                                                                                                                                                                                                                                                                                                                                             | <input type="radio"/> Nooit <input type="radio"/> Maandelijks <input type="radio"/> Wekelijks <input type="radio"/> Dagelijks <input type="radio"/> Altijd |

1  
2  
3  
4  
5  
6  
7  
8  
9

---

10.9 Hoeveel voet/enkel pijn heeft u gehad in de afgelopen week bij draaien als uw voet/enkel op de grond staat?

Geen  
 Mild  
 Matig  
 Ernstig  
 Zeer ernstig

---

10  
11  
12  
13  
14  
15  
16  
17  
18

---

10.10 Hoeveel voet/enkel pijn heeft u gehad in de afgelopen week bij het volledig uitstrekken van de voet/enkel?

Geen  
 Mild  
 Matig  
 Ernstig  
 Zeer ernstig

---

19  
20  
21  
22  
23  
24  
25  
26

---

10.11 Hoeveel voet/enkel pijn heeft u gehad in de afgelopen week bij het volledig naar u toe buigen/optrekken van de voet/enkel

Geen  
 Mild  
 Matig  
 Ernstig  
 Zeer ernstig

---

27  
28  
29  
30  
31  
32  
33  
34

---

10.12 Hoeveel voet/enkel pijn heeft u gehad in de afgelopen week bij het lopen op een vlakke ondergrond

Geen  
 Mild  
 Matig  
 Ernstig  
 Zeer ernstig

---

35  
36  
37  
38  
39  
40  
41  
42  
43

---

10.13 Hoeveel voet/enkel pijn heeft u gehad in de afgelopen week bij het trap op- en trap af lopen?

Geen  
 Mild  
 Matig  
 Ernstig  
 Zeer ernstig

---

44  
45  
46  
47  
48  
49  
50  
51

---

10.14 Hoeveel voet/enkel pijn heeft u gehad in de afgelopen week 's nachts in bed?

Geen  
 Mild  
 Matig  
 Ernstig  
 Zeer ernstig

---

52  
53  
54  
55  
56  
57  
58  
59  
60

---

10.15 Hoeveel voet/enkel pijn heeft u gehad in de afgelopen week bij het zitten of liggen?

Geen  
 Mild  
 Matig  
 Ernstig  
 Zeer ernstig

---



1  
2  
3  
4  
5  
6  
7  
8  
9  
10  
11  
12  
13  
14  
15  
16  
17  
18  
19  
20  
21  
22  
23  
24  
25  
26  
27  
28  
29  
30  
31  
32  
33  
34  
35  
36  
37  
38  
39  
40  
41  
42  
43  
44  
45  
46  
47  
48  
49  
50  
51  
52  
53  
54  
55  
56  
57  
58  
59  
60

|       |                                                                                                                        |                                    |                            |                             |                                    |                                    |
|-------|------------------------------------------------------------------------------------------------------------------------|------------------------------------|----------------------------|-----------------------------|------------------------------------|------------------------------------|
| 10.16 | Hoeveel voet/enkel pijn heeft u gehad in de afgelopen week bij het rechtop staan?                                      | <input type="radio"/> Geen         | <input type="radio"/> Mild | <input type="radio"/> Matig | <input type="radio"/> Ernstig      | <input type="radio"/> Zeer ernstig |
| 10.17 | In welke mate werd u gehinderd bij het trap aflopen?                                                                   | <input type="radio"/> Niet Ernstig | <input type="radio"/> Mild | <input type="radio"/> Matig | <input type="radio"/> Zeer ernstig | <input type="radio"/>              |
| 10.18 | In welke mate werd u gehinderd bij het trap op lopen?                                                                  | <input type="radio"/> Niet Ernstig | <input type="radio"/> Mild | <input type="radio"/> Matig | <input type="radio"/> Zeer ernstig | <input type="radio"/>              |
| 10.19 | In welke mate werd u gehinderd als u vanuit een zittende positie ging staan?                                           | <input type="radio"/> Niet Ernstig | <input type="radio"/> Mild | <input type="radio"/> Matig | <input type="radio"/> Zeer ernstig | <input type="radio"/>              |
| 10.20 | In welke mate werd u gehinderd bij het staan?                                                                          | <input type="radio"/> Niet Ernstig | <input type="radio"/> Mild | <input type="radio"/> Matig | <input type="radio"/> Zeer ernstig | <input type="radio"/>              |
| 10.21 | In welke mate werd u gehinderd bij het naar de grond buigen/iets oprapen?                                              | <input type="radio"/> Niet Ernstig | <input type="radio"/> Mild | <input type="radio"/> Matig | <input type="radio"/> Zeer ernstig | <input type="radio"/>              |
| 10.22 | In welke mate werd u gehinderd bij het lopen op een vlakke ondergrond?                                                 | <input type="radio"/> Niet Ernstig | <input type="radio"/> Mild | <input type="radio"/> Matig | <input type="radio"/> Zeer ernstig | <input type="radio"/>              |
| 10.23 | In welke mate werd u gehinderd bij het in- en uit de auto stappen?                                                     | <input type="radio"/> Niet Ernstig | <input type="radio"/> Mild | <input type="radio"/> Matig | <input type="radio"/> Zeer ernstig | <input type="radio"/>              |
| 10.24 | In welke mate werd u gehinderd bij het boodschappen doen?                                                              | <input type="radio"/> Niet Ernstig | <input type="radio"/> Mild | <input type="radio"/> Matig | <input type="radio"/> Zeer ernstig | <input type="radio"/>              |
| 10.25 | In welke mate werd u gehinderd bij sokken/panty's aantrekken?                                                          | <input type="radio"/> Niet Ernstig | <input type="radio"/> Mild | <input type="radio"/> Matig | <input type="radio"/> Zeer ernstig | <input type="radio"/>              |
| 10.26 | In welke mate werd u gehinderd bij het opstaan uit bed?                                                                | <input type="radio"/> Niet Ernstig | <input type="radio"/> Mild | <input type="radio"/> Matig | <input type="radio"/> Zeer ernstig | <input type="radio"/>              |
| 10.27 | In welke mate werd u gehinderd bij het sokken uittrekken?                                                              | <input type="radio"/> Niet Ernstig | <input type="radio"/> Mild | <input type="radio"/> Matig | <input type="radio"/> Zeer ernstig | <input type="radio"/>              |
| 10.28 | In welke mate werd u gehinderd bij het in bed liggen (omdraaien, lange tijd uw voet/enkel in dezelfde positie houden)? | <input type="radio"/> Niet Ernstig | <input type="radio"/> Mild | <input type="radio"/> Matig | <input type="radio"/> Zeer ernstig | <input type="radio"/>              |

|       |                                                                                                                  |                                                                                                                                                                    |                                                                      |                             |                              |
|-------|------------------------------------------------------------------------------------------------------------------|--------------------------------------------------------------------------------------------------------------------------------------------------------------------|----------------------------------------------------------------------|-----------------------------|------------------------------|
| 10.29 | In welke mate werd u gehinderd bij het in/uit bad stappen?                                                       | <input type="radio"/> Niet<br>Ernstig                                                                                                                              | <input type="radio"/> Mild<br><input type="radio"/> Zeer ernstig     | <input type="radio"/> Matig | <input type="radio"/>        |
| 10.30 | In welke mate werd u gehinderd bij zitten?                                                                       | <input type="radio"/> Niet<br>Ernstig                                                                                                                              | <input type="radio"/> Mild<br><input type="radio"/> Zeer ernstig     | <input type="radio"/> Matig | <input type="radio"/>        |
| 10.31 | In welke mate werd u gehinderd bij het toilet op en af gaan?                                                     | <input type="radio"/> Niet<br>Ernstig                                                                                                                              | <input type="radio"/> Mild<br><input type="radio"/> Zeer ernstig     | <input type="radio"/> Matig | <input type="radio"/>        |
| 10.32 | In welke mate werd u gehinderd bij zwaar huishoudelijk werk (bijvoorbeeld zware dozen sjouwen, vloer schrobben)? | <input type="radio"/> Niet<br>Ernstig                                                                                                                              | <input type="radio"/> Mild<br><input type="radio"/> Zeer ernstig     | <input type="radio"/> Matig | <input type="radio"/>        |
| 10.33 | In welke mate werd u gehinderd bij licht huishoudelijk werk (bijvoorbeeld koken, afstoffen)?                     | <input type="radio"/> Niet<br>Ernstig                                                                                                                              | <input type="radio"/> Mild<br><input type="radio"/> Zeer ernstig     | <input type="radio"/> Matig | <input type="radio"/>        |
| 10.34 | In welke mate werd u gehinderd bij hurken?                                                                       | <input type="radio"/> Niet<br>Ernstig                                                                                                                              | <input type="radio"/> Mild<br><input type="radio"/> Zeer ernstig     | <input type="radio"/> Matig | <input type="radio"/>        |
| 10.35 | In welke mate werd u gehinderd bij hardlopen?                                                                    | <input type="radio"/> Niet<br>Ernstig                                                                                                                              | <input type="radio"/> Mild<br><input type="radio"/> Zeer ernstig     | <input type="radio"/> Matig | <input type="radio"/>        |
| 10.36 | In welke mate werd u gehinderd bij springen?                                                                     | <input type="radio"/> Niet<br>Ernstig                                                                                                                              | <input type="radio"/> Mild<br><input type="radio"/> Zeer ernstig     | <input type="radio"/> Matig | <input type="radio"/>        |
| 10.37 | In welke mate werd u gehinderd bij ronddraaien op uw aangedane voet/enkel?                                       | <input type="radio"/> Niet<br>Ernstig                                                                                                                              | <input type="radio"/> Mild<br><input type="radio"/> Zeer ernstig     | <input type="radio"/> Matig | <input type="radio"/>        |
| 10.38 | In welke mate werd u gehinderd bij knielen?                                                                      | <input type="radio"/> Niet<br>Ernstig                                                                                                                              | <input type="radio"/> Mild<br><input type="radio"/> Zeer ernstig     | <input type="radio"/> Matig | <input type="radio"/>        |
| 10.39 | Hoe vaak bent u zich bewust van uw voet/enkel probleem?                                                          | <input type="radio"/> Nooit<br>Wekelijks                                                                                                                           | <input type="radio"/> Maandelijks<br><input type="radio"/> Dagelijks | <input type="radio"/>       | <input type="radio"/> Altijd |
| 10.40 | Heeft u uw leven veranderd om activiteiten te vermijden die schadelijk kunnen zijn voor uw voet/enkel?           | <input type="radio"/> Niet<br><input type="radio"/> Enigszins<br><input type="radio"/> Matig<br><input type="radio"/> Behoorlijk<br><input type="radio"/> Volledig |                                                                      |                             |                              |

1  
2  
3  
4  
5  
6  
7  
8  
9

10.41 In hoeverre kunt u op uw voet/enkel vertrouwen?

Volledig  
 Behoorlijk  
 Matig  
 Enigzins  
 Niet

10  
11  
12  
13  
14  
15  
16  
17  
18  
19  
20  
21  
22

10.42 In het algemeen, in welke mate ondervindt u hinder van uw voet/enkel

Geen  
 Mild  
 Matig  
 Ernstig  
 Zeer ernstig

23  
24  
25  
26

## Vragenlijst PRIMA studie 12 weken - PRODISQ - Gezondheid en werk

| Number | Question                                                                                                                                                                                                                                                                    | Answers                                                                                                                                                                                                                                                                                                                                                                                                                                                                                                                                                                |
|--------|-----------------------------------------------------------------------------------------------------------------------------------------------------------------------------------------------------------------------------------------------------------------------------|------------------------------------------------------------------------------------------------------------------------------------------------------------------------------------------------------------------------------------------------------------------------------------------------------------------------------------------------------------------------------------------------------------------------------------------------------------------------------------------------------------------------------------------------------------------------|
| 11.1   | Wat is uw leeftijd?                                                                                                                                                                                                                                                         | <input type="text"/> jaar                                                                                                                                                                                                                                                                                                                                                                                                                                                                                                                                              |
| 11.2   | Wat is uw geslacht?                                                                                                                                                                                                                                                         | <input type="radio"/> Man<br><input type="radio"/> Vrouw                                                                                                                                                                                                                                                                                                                                                                                                                                                                                                               |
| 11.3   | Wat is de hoogste opleiding die u heeft afgemaakt (Zoek uw hoogste opleiding en kruis het hokje daarvoor aan)?                                                                                                                                                              | <input type="checkbox"/> Ik heb geen school of opleiding afgemaakt<br><input type="checkbox"/> Lagere school of basisschool<br><input type="checkbox"/> Huishoudschool, vbo, lbo, lts, leao of lhno<br><input type="checkbox"/> Mavo, mulo, ivo of vmbo<br><input type="checkbox"/> Mbo, mts, meao, mhno, inas of intas<br><input type="checkbox"/> Havo, vwo, hbs, mms, atheneum of gymnasium<br><input type="checkbox"/> Hbo, hts, heao of hhno<br><input type="checkbox"/> Universiteit<br><input type="checkbox"/> Ik heb een andere opleiding afgemaakt, namelijk |
| 11.3.1 | <b><i>If 'Wat is de hoogste opleiding die u heeft afgemaakt (Zoek uw hoogste opleiding en kruis het hokje daarvoor aan)?' is equal to 'Ik heb een andere opleiding afgemaakt, namelijk' answer this question:</i></b><br>Wat is de hoogste opleiding die u heeft afgemaakt? | <input type="text"/>                                                                                                                                                                                                                                                                                                                                                                                                                                                                                                                                                   |

27  
28  
29  
30  
31  
32  
33  
34  
35  
36  
37  
38  
39  
40  
41  
42  
43  
44  
45  
46  
47  
48  
49  
50  
51  
52  
53  
54  
55  
56  
57  
58  
59  
60

- 1  
2  
3  
4  
5  
6  
7  
8  
9  
10  
11  
12  
13
- 11.4 Wat doet u in het dagelijks leven?
- Ik zit op school, ik studeer
- Ik werk in loondienst
- Ik ben zelfstandig ondernemer
- Ik ben huisvrouw, huisman
- Ik ben werkloos
- Ik ben arbeidsongeschikt
- Ik ben met pensioen of prepensioen
- Ik doe iets anders, namelijk

14  
15  
16  
17

11.4.1 ***If 'Wat doet u in het dagelijks leven?' is equal to 'Ik ben arbeidsongeschikt' answer this question:***

Wat doet u in het dagelijks leven?

18  
19  
20  
21  
22  
23

11.4.2 ***If 'Wat doet u in het dagelijks leven?' is equal to 'Ik doe iets anders, namelijk' answer this question:***

Wat doet u in het dagelijks leven?

24  
25  
26  
27  
28

11.5 Hebt u betaald werk?

Nee

Ja

29  
30  
31  
32

11.5.1 ***If 'Hebt u betaald werk?' is equal to 'Ja' answer this question:***

Wat is uw beroep?

33  
34  
35  
36  
37

11.5.2 ***If 'Hebt u betaald werk?' is equal to 'Ja' answer this question:***

Hoeveel uur per week werkt u (Tel alleen de uren waarvoor u betaald wordt)?

 uren

38  
39  
40  
41  
42

11.5.3 ***If 'Hebt u betaald werk?' is equal to 'Ja' answer this question:***

Hoeveel dagen in de week werkt u?

 Dagen

43  
44  
45  
46  
47

11.5.4 ***If 'Hebt u betaald werk?' is equal to 'Ja' answer this question:***

Bent u in de afgelopen 4 weken afwezig geweest van uw werk omdat u ziek was?

Nee

Ja

48  
49  
50  
51  
52  
53  
54

11.5.4.1 ***If 'Bent u in de afgelopen 4 weken afwezig geweest van uw werk omdat u ziek was?' is equal to 'Ja' answer this question:***

Bent u in de afgelopen 4 weken afwezig geweest van uw werk omdat u ziek was (Tel alleen de werkdagen in de afgelopen 4 weken)?

 dagen afwezig geweest

55  
56  
57  
58  
59  
60

11.5.4.2 ***If 'Bent u in de afgelopen 4 weken afwezig geweest van uw werk omdat u ziek was?' is equal to 'Ja' answer this question:***

Was u langer dan de gehele periode van 4 weken afwezig van uw werk doordat u ziek was?

Nee

Ja

1  
2  
3  
4  
5  
6  
7  
8  
9  
10  
11  
12  
13  
14  
15  
16  
17  
18  
19  
20  
21  
22  
23  
24  
25  
26  
27  
28  
29  
30  
31  
32  
33  
34  
35  
36  
37  
38  
39  
40  
41  
42  
43  
44  
45  
46  
47  
48  
49  
50  
51  
52  
53  
54  
55  
56  
57  
58  
59  
60

|            |                                                                                                                                                                                                                                                                                                                                                                                                                 |                                                                                       |
|------------|-----------------------------------------------------------------------------------------------------------------------------------------------------------------------------------------------------------------------------------------------------------------------------------------------------------------------------------------------------------------------------------------------------------------|---------------------------------------------------------------------------------------|
| 11.5.4.2.1 | <b>If 'Was u langer dan de gehele periode van 4 weken afwezig van uw werk doordat u ziek was?' is equal to 'Ja' answer this question:</b><br>Wanneer heeft u zich ziek gemeld?                                                                                                                                                                                                                                  | <input type="text"/> <input type="text"/> <input type="text"/> (dd-mm-yyyy)           |
| 11.5.5     | <b>If 'Hebt u betaald werk?' is equal to 'Ja' answer this question:</b><br>Waren er in de afgelopen 4 weken, dagen waarop u wel gewerkt heeft, maar tijdens uw werk last had van lichamelijke of psychische problemen?                                                                                                                                                                                          | <input type="radio"/> Ja<br><input type="radio"/> Nee                                 |
| 11.5.5.1   | <b>If 'Waren er in de afgelopen 4 weken, dagen waarop u wel gewerkt heeft, maar tijdens uw werk last had van lichamelijke of psychische problemen?' is equal to 'Ja' answer this question:</b><br>Op hoeveel werkdagen had u tijdens uw werk last van uw lichamelijke of psychische problemen?                                                                                                                  | <input type="text"/> werkdagen                                                        |
| 11.5.5.2   | <b>If 'Waren er in de afgelopen 4 weken, dagen waarop u wel gewerkt heeft, maar tijdens uw werk last had van lichamelijke of psychische problemen?' is equal to 'Ja' answer this question:</b><br>Op de dagen dat u last had, kon u misschien niet zoveel werk doen als normaal. Hoeveel werk kon u op deze dagen gemiddeld doen?                                                                               | Ik kon op deze dagen niks doen (0.00)      Ik kon net zoveel doen als normaal (10.00) |
| 11.6       | Waren er dagen waarop u minder onbetaald werk kon doen door uw lichamelijke of psychische problemen?                                                                                                                                                                                                                                                                                                            | <input type="radio"/> Nee<br><input type="radio"/> Ja                                 |
| 11.6.1     | <b>If 'Waren er dagen waarop u minder onbetaald werk kon doen door uw lichamelijke of psychische problemen?' is equal to 'Ja' answer this question:</b><br>Op hoeveel dagen was dit zo?                                                                                                                                                                                                                         | <input type="text"/> Dagen                                                            |
| 11.6.2     | <b>If 'Waren er dagen waarop u minder onbetaald werk kon doen door uw lichamelijke of psychische problemen?' is equal to 'Ja' answer this question:</b><br>Stel dat iemand, bijvoorbeeld uw partner, familielid of een bekende, u op deze dagen had geholpen. En al het onbetaalde werk wat u niet kon doen, voor u had gedaan. Hoeveel uur was die persoon hier op deze dagen dan gemiddeld mee bezig geweest? | <input type="text"/> uur op deze dagen                                                |

## Vragenlijst PRIMA studie 12 weken - PRODISQ - Zorggebruik

| Number | Question | Answers |
|--------|----------|---------|
|--------|----------|---------|

Wij willen graag weten met welke dokters u in de afgelopen 3 maanden een afspraak had. Het gaat om afspraken voor uzelf. Ook andere zorgverleners tellen mee. Bijvoorbeeld de fysiotherapeut.

|        |                                                                                                                                                                                                                          |                                                       |
|--------|--------------------------------------------------------------------------------------------------------------------------------------------------------------------------------------------------------------------------|-------------------------------------------------------|
| 12.1   | Bent u in de afgelopen 3 maanden naar uw huisarts geweest?                                                                                                                                                               | <input type="radio"/> Nee<br><input type="radio"/> Ja |
| 12.1.1 | <b>If 'Bent u in de afgelopen 3 maanden naar uw huisarts geweest?' is equal to 'Ja' answer this question:</b><br>Hoeveel afspraken had u?                                                                                | <input type="text"/> afspraken                        |
| 12.2   | Bent u in de afgelopen 3 maanden in contact geweest met een maatschappelijk werker?                                                                                                                                      | <input type="radio"/> Nee<br><input type="radio"/> Ja |
| 12.2.1 | <b>If 'Bent u in de afgelopen 3 maanden in contact geweest met een maatschappelijk werker?' is equal to 'Ja' answer this question:</b><br>Hoeveel afspraken had u?                                                       | <input type="text"/> afspraken                        |
| 12.3   | Bent u in de afgelopen 3 maanden naar een fysiotherapeut geweest? Of een caesartherapeut, therapeut mensendieck of een manueel therapeut?                                                                                | <input type="radio"/> Nee<br><input type="radio"/> Ja |
| 12.3.1 | <b>If 'Bent u in de afgelopen 3 maanden naar een fysiotherapeut geweest? Of een caesartherapeut, therapeut mensendieck of een manueel therapeut?' is equal to 'Ja' answer this question:</b><br>Hoeveel afspraken had u? | <input type="text"/> afspraken                        |
| 12.4   | Bent u in de afgelopen 3 maanden naar een ergotherapeut geweest?                                                                                                                                                         | <input type="radio"/> Nee<br><input type="radio"/> Ja |
| 12.4.1 | <b>If 'Bent u in de afgelopen 3 maanden naar een ergotherapeut geweest?' is equal to 'Ja' answer this question:</b><br>Hoeveel afspraken had u?                                                                          | <input type="text"/> afspraken                        |
| 12.5   | Bent u in de afgelopen 3 maanden naar een logopedist geweest?                                                                                                                                                            | <input type="radio"/> Nee<br><input type="radio"/> Ja |
| 12.5.1 | <b>If 'Bent u in de afgelopen 3 maanden naar een logopedist geweest?' is equal to 'Ja' answer this question:</b><br>Hoeveel afspraken had u?                                                                             | <input type="text"/> afspraken                        |
| 12.6   | Bent u in de afgelopen 3 maanden naar een diëtist geweest?                                                                                                                                                               | <input type="radio"/> Nee<br><input type="radio"/> Ja |
| 12.6.1 | <b>If 'Bent u in de afgelopen 3 maanden naar een diëtist geweest?' is equal to 'Ja' answer this question:</b><br>Hoeveel afspraken had u?                                                                                | <input type="text"/> afspraken                        |

- 1  
2  
3  
4  
5
- 12.7 Bent u in de afgelopen 3 maanden naar een homeopaat geweest? Of een acupuncturist?  Nee  
 Ja
- 
- 6  
7  
8  
9  
10  
11
- 12.7.1 ***If 'Bent u in de afgelopen 3 maanden naar een homeopaat geweest? Of een acupuncturist?' is equal to 'Ja' answer this question:***  afspraken  
Hoeveel afspraken had u?
- 
- 12  
13  
14  
15
- 12.8 Bent u in de afgelopen 3 maanden naar een psycholoog geweest? Of een psychotherapeut of psychiater?  Nee  
 Ja
- 
- 16  
17  
18  
19  
20  
21
- 12.8.1 ***If 'Bent u in de afgelopen 3 maanden naar een psycholoog geweest? Of een psychotherapeut of psychiater?' is equal to 'Ja' answer this question:***  afspraken  
Hoeveel afspraken had u?
- 
- 22  
23  
24  
25
- 12.9 Heeft u in de afgelopen 3 maanden afspraken gehad met de bedrijfsarts?  Nee  
 Ja
- 
- 26  
27  
28  
29  
30  
31
- 12.9.1 ***If 'Heeft u in de afgelopen 3 maanden afspraken gehad met de bedrijfsarts?' is equal to 'Ja' answer this question:***  afspraken  
Hoeveel afspraken had u?
- 
- 32  
33  
34  
35
- 12.10 Heeft u in de afgelopen 3 maanden hulp van de thuiszorg gehad?  Ja  
 Nee
- 
- 36  
37  
38  
39  
40  
41  
42  
43  
44  
45  
46
- 12.10.1 ***If 'Heeft u in de afgelopen 3 maanden hulp van de thuiszorg gehad?' is equal to 'Ja' answer this question:***  Huishoudelijke hulp; voorbeeld: stofzuigen, bed opmaken, boodschappen doen  
Wat voor hulp van de thuiszorg heeft u gehad in de afgelopen 3 maanden?  Verzorging van uzelf; voorbeeld: hulp bij douchen of aankleden  
 Verpleging; voorbeeld: verband omdoen, medicijnen geven, bloeddruk meten
- 
- 47  
48  
49  
50  
51  
52  
53  
54
- 12.10.1.1 ***If 'Wat voor hulp van de thuiszorg heeft u gehad in de afgelopen 3 maanden?' is equal to 'Huishoudelijke hulp; voorbeeld: stofzuigen, bed opmaken, boodschappen doen' answer this question:***  weken in de afgelopen 3 maanden  
Hoeveel weken heeft u deze thuiszorg gehad?  
Huishoudelijke hulp:
- 
- 55  
56  
57  
58  
59  
60
- 12.10.1.2 ***If 'Wat voor hulp van de thuiszorg heeft u gehad in de afgelopen 3 maanden?' is equal to 'Verzorging van uzelf; voorbeeld: hulp bij douchen of aankleden' answer this question:***  weken in de afgelopen 3 maanden  
Hoeveel weken heeft u deze thuiszorg gehad?  
Verzorging van uzelf:

1  
2 12.10.1.3 **If 'Wat voor hulp van de thuiszorg heeft u gehad in**  weken in  
3 **de afgelopen 3 maanden?' is equal to 'Verpleging;** de afgelopen 3 maanden  
4 **voorbeeld: verband omdoen, medicijnen geven,**  
5 **bloeddruk meten' answer this question:**  
6 Hoeveel weken heeft u deze thuiszorg gehad?  
7 Verpleging:  
8

9 12.10.1.4 **If 'Wat voor hulp van de thuiszorg heeft u gehad in**  uur in de  
10 **de afgelopen 3 maanden?' is equal to** week  
11 **'Huishoudelijke hulp; voorbeeld: stofzuigen, bed**  
12 **opmaken, boodschappen doen' answer this**  
13 **question:**  
14 Hoeveel uur thuiszorg kreeg u in deze weken  
15 gemiddeld? Huishoudelijke hulp: gemiddeld  
16  
17

18 12.10.1.5 **If 'Wat voor hulp van de thuiszorg heeft u gehad in**  uur in de  
19 **de afgelopen 3 maanden?' is equal to 'Verzorging** week  
20 **van uzelf; voorbeeld: hulp bij douchen of**  
21 **aankleden' answer this question:**  
22 Hoeveel uur thuiszorg kreeg u in deze weken  
23 gemiddeld? Verzorging van uzelf: gemiddeld  
24

25 12.10.1.6 **If 'Wat voor hulp van de thuiszorg heeft u gehad in**  uur in de  
26 **de afgelopen 3 maanden?' is equal to 'Verpleging;** week  
27 **voorbeeld: verband omdoen, medicijnen geven,**  
28 **bloeddruk meten' answer this question:**  
29 Hoeveel uur thuiszorg kreeg u in deze weken  
30 gemiddeld? Verpleging: gemiddeld  
31  
32

33 12.11 Heeft u in de afgelopen 3 maanden medicijnen  Ja  
34 gebruikt?  Nee  
35  
36

37 12.11.1 **If 'Heeft u in de afgelopen 3 maanden medicijnen**  
38 **gebruikt?' is equal to 'Ja' answer this question:**   
39 Welke medicijnen heeft u in de afgelopen 3 maanden  
40 gebruikt?  
41  
42

43 12.12 Bent u in de afgelopen 3 maanden op de  Nee  
44 spoedeisende eerste hulp van een ziekenhuis  Ja  
45 geweest? (Een andere naam voor spoedeisende  
46 eerste hulp is EHBO)  
47

48 12.12.1 **If 'Bent u in de afgelopen 3 maanden op de**  keer  
49 **spoedeisende eerste hulp van een ziekenhuis**  
50 **geweest? (Een andere naam voor spoedeisende**  
51 **eerste hulp is EHBO)' is equal to 'Ja' answer this**  
52 **question:**  
53 Hoe vaak bent u geweest?  
54  
55

56 12.13 Bent u in de afgelopen 3 maanden met een  Nee  
57 ambulance naar het ziekenhuis gebracht? (Een  Ja  
58 andere naam voor ambulance is ziekenauto)  
59  
60



1  
2  
3  
4  
5  
6  
7

12.13.1 ***If 'Bent u in de afgelopen 3 maanden met een ambulance naar het ziekenhuis gebracht? (Een andere naam voor ambulance is ziekenauto)' is equal to 'Ja' answer this question:***  keer  
 Hoe vaak bent u naar het ziekenhuis gebracht?

8  
9  
10  
11  
12

12.14 Had u in de afgelopen 3 maanden een afspraak bij de polikliniek van het ziekenhuis? (Het gaat om afspraken voor uzelf met een dokter. Bijvoorbeeld met de cardioloog, reumatoloog of neuroloog)  Ja  
 Nee

13  
14  
15  
16  
17  
18  
19  
20  
21

12.14.1 ***If 'Had u in de afgelopen 3 maanden een afspraak bij de polikliniek van het ziekenhuis? (Het gaat om afspraken voor uzelf met een dokter. Bijvoorbeeld met de cardioloog, reumatoloog of neuroloog)' is equal to 'Ja' answer this question:***   
 Bij welke soorten dokters bent u in de afgelopen 3 maanden in het ziekenhuis geweest? En hoe vaak?

22  
23  
24  
25  
26  
27

12.15 Bent u in de afgelopen 3 maanden overdag in het ziekenhuis geweest voor een behandeling? (U bleef dus niet slapen. U kwam bijvoorbeeld voor een bloedtransfusie, nierdialyse of chemokuur)  Ja  
 Nee

28  
29  
30  
31  
32  
33  
34

12.15.1 ***If 'Bent u in de afgelopen 3 maanden overdag in het ziekenhuis geweest voor een behandeling? (U bleef dus niet slapen. U kwam bijvoorbeeld voor een bloedtransfusie, nierdialyse of chemokuur)' is equal to 'Ja' answer this question:***   
 Voor welke soort behandeling was dit?

35  
36  
37  
38  
39  
40  
41  
42  
43

12.15.2 ***If 'Bent u in de afgelopen 3 maanden overdag in het ziekenhuis geweest voor een behandeling? (U bleef dus niet slapen. U kwam bijvoorbeeld voor een bloedtransfusie, nierdialyse of chemokuur)' is equal to 'Ja' answer this question:***   
 Hoeveel keer moest u in de afgelopen 3 maanden voor deze behandelingen naar het ziekenhuis?

44  
45  
46  
47  
48  
49  
50

12.16 Bent u in de afgelopen 3 maanden ergens anders geweest voor een behandeling overdag? (U bleef dus niet slapen. U ging bijvoorbeeld naar de dagopvang van een woon-/zorgcentrum of een psychiatrische instelling. Of naar de dagbehandeling van een revalidatiecentrum)  Ja  
 Nee

51  
52  
53  
54  
55  
56  
57  
58  
59  
60

12.16.1 ***If 'Bent u in de afgelopen 3 maanden ergens anders geweest voor een behandeling overdag? (U bleef dus niet slapen. U ging bijvoorbeeld naar de dagopvang van een woon-/zorgcentrum of een psychiatrische instelling. Of naar de dagbehandeling van een revalidatiecentrum)' is equal to 'Ja' answer this question:***  Woon-/zorgcentrum  
 Revalidatiecentrum  
 Psychiatrische instelling  
 Een andere instelling, namelijk  
 Wat voor instelling was dit?

- 1  
2  
3  
4  
5  
6  
7
- 12.16.1.1 **If 'Wat voor instelling was dit?' is equal to 'Een andere instelling, namelijk' answer this question:**  
Wat voor instelling was dit?
- 8  
9  
10  
11  
12
- 12.16.1.2 **If 'Wat voor instelling was dit?' is equal to 'Woon-/zorgcentrum' answer this question:**  
Hoe vaak moest u hier in de afgelopen 3 maanden naartoe? Naar het woon-/zorgcentrum:
- 13  
14  
15  
16  
17
- 12.16.1.3 **If 'Wat voor instelling was dit?' is equal to 'Revalidatiecentrum' answer this question:**  
Hoe vaak moest u hier in de afgelopen 3 maanden naartoe? Naar het revalidatiecentrum:
- 18  
19  
20  
21  
22  
23
- 12.16.1.4 **If 'Wat voor instelling was dit?' is equal to 'Psychiatrische instelling' answer this question:**  
Hoe vaak moest u hier in de afgelopen 3 maanden naartoe? Naar de psychiatrische instelling:
- 24  
25  
26  
27  
28
- 12.16.1.5 **If 'Wat voor instelling was dit?' is equal to 'Een andere instelling, namelijk' answer this question:**  
Hoe vaak moest u hier in de afgelopen 3 maanden naartoe? Naar de andere instelling:
- 29  
30  
31  
32  
33
- 12.17 Heeft u in de afgelopen 3 maanden weleens in het ziekenhuis gelegen? (U moest dus blijven slapen. Bijvoorbeeld omdat u geopereerd was en niet meteen naar huis kon)
- 34  
35  
36  
37  
38  
39  
40  
41  
42
- 12.17.1 **If 'Heeft u in de afgelopen 3 maanden weleens in het ziekenhuis gelegen? (U moest dus blijven slapen. Bijvoorbeeld omdat u geopereerd was en niet meteen naar huis kon)' is equal to 'Ja' answer this question:**  
Hoe vaak heeft u in de afgelopen 3 maanden in het ziekenhuis gelegen?
- 43  
44  
45  
46  
47  
48  
49
- 12.17.2 **If 'Heeft u in de afgelopen 3 maanden weleens in het ziekenhuis gelegen? (U moest dus blijven slapen. Bijvoorbeeld omdat u geopereerd was en niet meteen naar huis kon)' is equal to 'Ja' answer this question:**  
Hoe lang heeft u in het ziekenhuis gelegen?
- 50  
51  
52  
53  
54  
55  
56  
57  
58  
59  
60

1  
2  
3  
4  
5  
6  
7  
8

12.18.1 **If 'Moest u in de afgelopen 3 maanden ergens anders blijven slapen voor uw gezondheid? (Bijvoorbeeld in een woon-/zorgcentrum, psychiatrische instelling of revalidatiecentrum)' is equal to 'Ja' answer this question:**  
Wat voor instelling was dit?

Woon-/zorgcentrum  
 Revalidatiecentrum  
 Psychiatrische instelling  
 Een andere instelling, namelijk

9  
10  
11  
12  
13  
14

12.18.1.1 **If 'Wat voor instelling was dit?' is equal to 'Een andere instelling, namelijk' answer this question:**  
Een andere instelling, namelijk

15  
16  
17  
18  
19

12.18.1.2 **If 'Wat voor instelling was dit?' is equal to 'Woon-/zorgcentrum' answer this question:**  
Hoe lang bent u in deze instelling geweest? In het woon-/zorgcentrum:

dagen in de afgelopen 3 maanden

20  
21  
22  
23  
24  
25

12.18.1.3 **If 'Wat voor instelling was dit?' is equal to 'Revalidatiecentrum' answer this question:**  
Hoe lang bent u in deze instelling geweest? In het revalidatiecentrum:

dagen in de afgelopen 3 maanden

26  
27  
28  
29  
30

12.18.1.4 **If 'Wat voor instelling was dit?' is equal to 'Psychiatrische instelling' answer this question:**  
Hoe lang bent u in deze instelling geweest? In de psychiatrische instelling:

dagen in de afgelopen 3 maanden

31  
32  
33  
34  
35

12.18.1.5 **If 'Wat voor instelling was dit?' is equal to 'Een andere instelling, namelijk' answer this question:**  
Hoe lang bent u in deze instelling geweest? In de andere instelling:

dagen in de afgelopen 3 maanden

36  
37  
38  
39  
40

12.19 Heeft u in de afgelopen 3 maanden hulp gekregen van een familielid of een bekende vanwege uw lichamelijke of psychische problemen?

Ja  
 Nee

41  
42  
43  
44  
45  
46  
47  
48  
49  
50  
51  
52  
53  
54  
55  
56  
57  
58  
59  
60

12.19.1 **If 'Heeft u in de afgelopen 3 maanden hulp gekregen van een familielid of een bekende vanwege uw lichamelijke of psychische problemen?' is equal to 'Ja' answer this question:**  
Wat voor hulp van familieleden of bekenden heeft u gehad in de afgelopen 3 maanden?

Huishoudelijke hulp - voorbeeld: stofzuigen, bed opmaken, boodschappen doen, klaarmaken van eten en drinken, verzorgen van kinderen  
 Verzorging van uzelf - voorbeeld: hulp bij douchen of aankleden, hulp bij het eten en drinken of het geven van medicijnen  
 Praktische hulp - voorbeeld: ondersteuning bij wandelen, het maken van uitstapjes of bezoeken aan bekenden, bezoeken aan de huisarts of het ziekenhuis, het regelen van hulp of het regelen van financiële zaken

- 1  
2  
3  
4  
5  
6  
7  
8  
9  
10
- 12.19.1.1 **If 'Wat voor hulp van familieleden of bekenden heeft u gehad in de afgelopen 3 maanden?' is equal to 'Huishoudelijke hulp - voorbeeld: stofzuigen, bed opmaken, boodschappen doen, klaarmaken van eten en drinken, verzorgen van kinderen' answer this question:**  
Hoeveel weken heeft u deze hulp gehad?  
Huishoudelijke hulp:
- weken in de afgelopen 3 maanden
- 
- 11  
12  
13  
14  
15  
16  
17  
18  
19
- 12.19.1.2 **If 'Wat voor hulp van familieleden of bekenden heeft u gehad in de afgelopen 3 maanden?' is equal to 'Verzorging van uzelf - voorbeeld: hulp bij douchen of aankleden, hulp bij het eten en drinken of het geven van medicijnen' answer this question:**  
Hoeveel weken heeft u deze hulp gehad? Verzorging van uzelf:
- weken in de afgelopen 3 maanden
- 
- 20  
21  
22  
23  
24  
25  
26  
27  
28  
29  
30  
31
- 12.19.1.3 **If 'Wat voor hulp van familieleden of bekenden heeft u gehad in de afgelopen 3 maanden?' is equal to 'Praktische hulp - voorbeeld: ondersteuning bij wandelen, het maken van uitstapjes of bezoeken aan bekenden, bezoeken aan de huisarts of het ziekenhuis, het regelen van hulp of het regelen van financiële zaken' answer this question:**  
Hoeveel uur hulp kreeg u in deze weken gemiddeld?  
Praktische hulp:
- weken in de afgelopen 3 maanden
- 
- 32  
33  
34  
35  
36  
37  
38  
39  
40  
41
- 12.19.1.4 **If 'Wat voor hulp van familieleden of bekenden heeft u gehad in de afgelopen 3 maanden?' is equal to 'Huishoudelijke hulp - voorbeeld: stofzuigen, bed opmaken, boodschappen doen, klaarmaken van eten en drinken, verzorgen van kinderen' answer this question:**  
Hoeveel uur hulp kreeg u in deze weken gemiddeld?  
Huishoudelijke hulp: gemiddeld
- uur in de week
- 
- 42  
43  
44  
45  
46  
47  
48  
49
- 12.19.1.5 **If 'Wat voor hulp van familieleden of bekenden heeft u gehad in de afgelopen 3 maanden?' is equal to 'Verzorging van uzelf - voorbeeld: hulp bij douchen of aankleden, hulp bij het eten en drinken of het geven van medicijnen' answer this question:**  
Hoeveel uur hulp kreeg u in deze weken gemiddeld?  
Verzorging van uzelf: gemiddeld
- uur in de week
- 
- 50  
51  
52  
53  
54  
55  
56  
57  
58  
59  
60
- 12.19.1.6 **If 'Wat voor hulp van familieleden of bekenden heeft u gehad in de afgelopen 3 maanden?' is equal to 'Praktische hulp - voorbeeld: ondersteuning bij wandelen, het maken van uitstapjes of bezoeken aan bekenden, bezoeken aan de huisarts of het ziekenhuis, het regelen van hulp of het regelen van financiële zaken' answer this question:**  
Hoeveel uur hulp kreeg u in deze weken gemiddeld?  
Praktische hulp: gemiddeld
- uur in de week

## Vragenlijst PRIMA studie 12 weken - Dank

| Number | Question                                                                                                                                      | Answers                                                                            |
|--------|-----------------------------------------------------------------------------------------------------------------------------------------------|------------------------------------------------------------------------------------|
| 13.1   | Hartelijk dank voor de tijd die u heeft genomen om de vragenlijsten in te vullen. Indien u nog opmerkingen heeft kunt u deze hierin plaatsen. |  |

## Survey 'Vragenlijst PRIMA studie 26 weken'

### Vragenlijst PRIMA studie 26 weken - AOFAS - Pijn

| Number | Question                            | Answers                                                                                                                                                                                                         |
|--------|-------------------------------------|-----------------------------------------------------------------------------------------------------------------------------------------------------------------------------------------------------------------|
| 1.1    | Hoeveel pijn ervaart u aan uw voet? | <input type="checkbox"/> Geen<br><input type="checkbox"/> Milde pijnklachten of af en toe pijn<br><input type="checkbox"/> Matige pijnklachten, dagelijks<br><input type="checkbox"/> Vrijwel continu erge pijn |

### Vragenlijst PRIMA studie 26 weken - AOFAS resterende gedeelte

| Number | Question                                              | Answers                                                                                                                                                                                                                                                                                                                                                                                                                                           |
|--------|-------------------------------------------------------|---------------------------------------------------------------------------------------------------------------------------------------------------------------------------------------------------------------------------------------------------------------------------------------------------------------------------------------------------------------------------------------------------------------------------------------------------|
| 2.1    | Hoeveel beperkingen in het dagelijks leven ervaart u? | <input type="radio"/> Geen beperkingen, geen hulpmiddelen nodig<br><input type="radio"/> Geen beperkingen in algemeen dagelijkse bezigheden, wel beperkingen in recreatieve activiteiten (sport, hobbies, etc) geen ondersteuning<br><input type="radio"/> Beperkingen bij dagelijkse- en recreatieve activiteiten, stok<br><input type="radio"/> Ernstige beperkingen bij dagelijkse- en recreatieactiviteiten, walker, krukken, rolstoel, brace |

- 1  
2  
3  
4  
5  
6  
7  
8
- 
- 2.2 Wat is de afstand die u in één keer kunt lopen?
- Meer dan 600 meter
  - 400 - 600 meter
  - 100 - 300 meter
  - Minder dan 100 meter
- 
- 9  
10  
11  
12  
13  
14  
15  
16
- 2.3 Heeft u moeite met lopen op een bepaalde ondergrond?
- Geen problemen bij lopen
  - Enig problemen op ongelijke ondergrond, trap, helling, ladders
  - Ernstige problemen bij ongelijke ondergrond, trap, helling, ladders
- 
- 17  
18  
19  
20  
21  
22
- 2.4 Hoe zou u uw looppatroon beoordelen?
- Normaal of minimaal afwijkend
  - Duidelijk
  - Ernstig
- 
- 23  
24  
25  
26  
27  
28  
29
- 2.5 Hoe zou u de beweeglijkheid van uw voet beoordelen ten opzichte van de andere zijde of ten opzichte van vóór het ongeval?
- Hetzelfde of licht beperkt t.o.v. de niet aangedane zijde of zoals voor het ongeval
  - Ongeveer de helft beperkt
  - Sterk verminderd, bijna geen bewegingen mogelijk
- 
- 30  
31  
32  
33  
34  
35  
36  
37
- 2.6 Hoe zou u de beweeglijkheid van uw enkel beoordelen ten opzichte van de andere zijde of ten opzichte van voor het ongeval?
- Hetzelfde of licht beperkt t.o.v. de niet aangedane zijde of zoals voor het ongeval
  - Ongeveer de helft beperkt
  - Sterk verminderd, bijna geen bewegingen mogelijk
- 
- 38  
39  
40  
41  
42  
43
- 2.7 Hoe zou u de stabiliteit van uw voet en enkel beoordelen
- Stabiel, ik verzwik mijn enkel hooguit incidenteel
  - Niet stabiel, ik verzwik mijn enkel vaak
- 
- 44  
45  
46  
47  
48  
49  
50  
51  
52  
53  
54  
55  
56  
57  
58  
59  
60
- 2.8 Hoe zou u de stand van uw voet beoordelen ten opzichte van de andere zijde of ten opzichte van voor het ongeval?
- Goed, ik kan mijn voet goed plat op de grond zetten, waarbij de stand niet afwijkend is
  - Ik sta vrijwel alleen op de buitenzijde van mijn voet
  - Ik kan mijn voet niet plat op de grond zetten en loop vrijwel alleen op mijn voorvoet

## Vragenlijst PRIMA studie 26 weken - VAS Pain score

| Number | Question                                                                                                                                                             | Answers             |
|--------|----------------------------------------------------------------------------------------------------------------------------------------------------------------------|---------------------|
| 3.1    | VAS pijnscore (Geef uw minimaal pijnscore aan tijdens dagelijkse activiteiten op een schaal van 0 tot 100, waarbij 0 geen pijn is en 100 de ergste pijn denkbaar is) | (0.00) 100 (100.00) |

## Vragenlijst PRIMA studie 26 weken - AAS

| Number | Question | Answers |
|--------|----------|---------|
|--------|----------|---------|

- 1  
2  
3  
4  
5  
6  
7  
8  
9  
10  
11  
12  
13  
14  
15  
16  
17  
18  
19  
20  
21  
22  
23  
24  
25  
26  
27  
28  
29  
30  
31  
32  
33  
34  
35  
36  
37  
38  
39  
40  
41  
42  
43  
44  
45  
46  
47  
48  
49  
50  
51  
52  
53  
54  
55  
56  
57  
58  
59  
60
- 4.1 Wat is het meest bij u van toepassing ten aanzien van uw activiteit?
- American Football
  - Basketbal
  - Gymnastiek/turnen
  - Handbal
  - Rugby
  - Voetbal
  - Hockey
  - Korfbal
  - Gevechtssporten: judo, karate, kung fu, taekwando, jiu jitsu, etc.
  - Oriëntatiewandelen
  - Rhythmische gymnastiek
  - Volleybal
  - Boxen
  - Freestyle snowboarden
  - IJshockey
  - Tennis
  - Worstelen
  - Fitness, aerobics
  - Badminton
  - Baseball
  - Cross-country hardlopen
  - Moderne pentathlon
  - Squash
  - Surfen, windsurfen
  - Tafel tennis
  - Atletiek: spring-, werponderdelen
  - Waterskiën
  - Dans
  - Schermen
  - Zaalhockey
  - Bergbeklimmen
  - Langlauf
  - Parachute springen
  - Softball
  - Speciale beroepen en werkactiviteiten; speciale beroepen: ballet, professioneel soldaat, speciale reddingswerker, stuntman, etc.
  - Duiken
  - Scubaduiken
  - Skaten, in-line skaten
  - Atletiek: looponderdelen
  - Triatlon
  - Gewichtsheffen, body-building



- Alle competitieve sporten hieronder met 'seasonal' conditioning
- Zwaar fysiek werk
- Alpine skiën en snowboarden
- Bowlen/curlen
- Golf
- Mountainbike/BMX
- Powerliften
- Zeilen
- Fysiek werk
- Wielrennen
- Paardrijden
- Motorsporten/technische sporten
- Roeien, kayakken
- Boogschieten
- Water polo en zwemmen
- Kunnen lopen op oneven grond
- Geen sport, echter geen limitatie in dagelijkse activiteiten
- Kunnen lopen op even grond, maar de dagelijkse activiteiten zijn gelimiteerd
- Niet kunnen lopen, fysieke handicap wegens enkelproblemen

- 
- 4.1.1 ***If 'Wat is het meest bij u van toepassing ten aanzien van uw activiteit?' is equal to 'American Football' answer this question:***  
American Football
- Professioneel
- Competitief
- Recreatief
- 
- 4.1.2 ***If 'Wat is het meest bij u van toepassing ten aanzien van uw activiteit?' is equal to 'Basketbal' answer this question:***  
Basketbal
- Professioneel
- Competitief
- Recreatief
- 
- 4.1.3 ***If 'Wat is het meest bij u van toepassing ten aanzien van uw activiteit?' is equal to 'Gymnastiek/turnen' answer this question:***  
Gymnastiek/turnen
- Professioneel
- Competitief
- Recreatief
- 
- 4.1.4 ***If 'Wat is het meest bij u van toepassing ten aanzien van uw activiteit?' is equal to 'Handbal' answer this question:***  
Handbal
- Professioneel
- Competitief
- Recreatief
- 
- 4.1.5 ***If 'Wat is het meest bij u van toepassing ten aanzien van uw activiteit?' is equal to 'Rugby' answer this question:***  
Rugby
- Professioneel
- Competitief
- Recreatief

|    |        |                                                                                                                                                                                          |                                     |
|----|--------|------------------------------------------------------------------------------------------------------------------------------------------------------------------------------------------|-------------------------------------|
| 1  |        |                                                                                                                                                                                          |                                     |
| 2  | 4.1.6  | <b>If 'Wat is het meest bij u van toepassing ten aanzien van uw acitiviteit?' is equal to 'Voetbal' answer this question:</b>                                                            | <input type="radio"/> Professioneel |
| 3  |        |                                                                                                                                                                                          | <input type="radio"/> Competitief   |
| 4  |        |                                                                                                                                                                                          | <input type="radio"/> Recreatief    |
| 5  |        | Voetbal                                                                                                                                                                                  |                                     |
| 6  |        |                                                                                                                                                                                          |                                     |
| 7  |        |                                                                                                                                                                                          |                                     |
| 8  | 4.1.7  | <b>If 'Wat is het meest bij u van toepassing ten aanzien van uw acitiviteit?' is equal to 'Hockey' answer this question:</b>                                                             | <input type="radio"/> Professioneel |
| 9  |        |                                                                                                                                                                                          | <input type="radio"/> Competitief   |
| 10 |        |                                                                                                                                                                                          | <input type="radio"/> Recreatief    |
| 11 |        | Hockey                                                                                                                                                                                   |                                     |
| 12 |        |                                                                                                                                                                                          |                                     |
| 13 |        |                                                                                                                                                                                          |                                     |
| 14 | 4.1.8  | <b>If 'Wat is het meest bij u van toepassing ten aanzien van uw acitiviteit?' is equal to 'Korfbal' answer this question:</b>                                                            | <input type="radio"/> Professioneel |
| 15 |        |                                                                                                                                                                                          | <input type="radio"/> Competitief   |
| 16 |        |                                                                                                                                                                                          | <input type="radio"/> Recreatief    |
| 17 |        | Korfbal                                                                                                                                                                                  |                                     |
| 18 |        |                                                                                                                                                                                          |                                     |
| 19 |        |                                                                                                                                                                                          |                                     |
| 20 | 4.1.9  | <b>If 'Wat is het meest bij u van toepassing ten aanzien van uw acitiviteit?' is equal to 'Gevechtssporten: judo, karate, kung fu, taekwando, jiu jitsu, etc.' answer this question:</b> | <input type="radio"/> Professioneel |
| 21 |        |                                                                                                                                                                                          | <input type="radio"/> Competitief   |
| 22 |        |                                                                                                                                                                                          | <input type="radio"/> Recreatief    |
| 23 |        | Gevechtssporten: judo, karate, kung fu, taekwando, jiu                                                                                                                                   |                                     |
| 24 |        | jitsu, etc.                                                                                                                                                                              |                                     |
| 25 |        |                                                                                                                                                                                          |                                     |
| 26 |        |                                                                                                                                                                                          |                                     |
| 27 | 4.1.10 | <b>If 'Wat is het meest bij u van toepassing ten aanzien van uw acitiviteit?' is equal to 'Oriëntatielopen' answer this question:</b>                                                    | <input type="radio"/> Professioneel |
| 28 |        |                                                                                                                                                                                          | <input type="radio"/> Competitief   |
| 29 |        |                                                                                                                                                                                          | <input type="radio"/> Recreatief    |
| 30 |        | Oriëntatielopen                                                                                                                                                                          |                                     |
| 31 |        |                                                                                                                                                                                          |                                     |
| 32 |        |                                                                                                                                                                                          |                                     |
| 33 | 4.1.11 | <b>If 'Wat is het meest bij u van toepassing ten aanzien van uw acitiviteit?' is equal to 'Rhythmische gymnastiek' answer this question:</b>                                             | <input type="radio"/> Professioneel |
| 34 |        |                                                                                                                                                                                          | <input type="radio"/> Competitief   |
| 35 |        |                                                                                                                                                                                          | <input type="radio"/> Recreatief    |
| 36 |        | Rhythmisch gymnastiek                                                                                                                                                                    |                                     |
| 37 |        |                                                                                                                                                                                          |                                     |
| 38 |        |                                                                                                                                                                                          |                                     |
| 39 | 4.1.12 | <b>If 'Wat is het meest bij u van toepassing ten aanzien van uw acitiviteit?' is equal to 'Volleybal' answer this question:</b>                                                          | <input type="radio"/> Professioneel |
| 40 |        |                                                                                                                                                                                          | <input type="radio"/> Competitief   |
| 41 |        |                                                                                                                                                                                          | <input type="radio"/> Recreatief    |
| 42 |        | Volleybal                                                                                                                                                                                |                                     |
| 43 |        |                                                                                                                                                                                          |                                     |
| 44 | 4.1.13 | <b>If 'Wat is het meest bij u van toepassing ten aanzien van uw acitiviteit?' is equal to 'Boxen' answer this question:</b>                                                              | <input type="radio"/> Professioneel |
| 45 |        |                                                                                                                                                                                          | <input type="radio"/> Competitief   |
| 46 |        |                                                                                                                                                                                          | <input type="radio"/> Recreatief    |
| 47 |        | Boxen                                                                                                                                                                                    |                                     |
| 48 |        |                                                                                                                                                                                          |                                     |
| 49 |        |                                                                                                                                                                                          |                                     |
| 50 | 4.1.14 | <b>If 'Wat is het meest bij u van toepassing ten aanzien van uw acitiviteit?' is equal to 'Freestyle snowboarden' answer this question:</b>                                              | <input type="radio"/> Professioneel |
| 51 |        |                                                                                                                                                                                          | <input type="radio"/> Competitief   |
| 52 |        |                                                                                                                                                                                          | <input type="radio"/> Recreatief    |
| 53 |        | Freestyle snowboarden                                                                                                                                                                    |                                     |
| 54 |        |                                                                                                                                                                                          |                                     |
| 55 |        |                                                                                                                                                                                          |                                     |
| 56 | 4.1.15 | <b>If 'Wat is het meest bij u van toepassing ten aanzien van uw acitiviteit?' is equal to 'Freestyle snowboarden' answer this question:</b>                                              | <input type="radio"/> Professioneel |
| 57 |        |                                                                                                                                                                                          | <input type="radio"/> Competitief   |
| 58 |        |                                                                                                                                                                                          | <input type="radio"/> Recreatief    |
| 59 |        | IJshockey                                                                                                                                                                                |                                     |
| 60 |        |                                                                                                                                                                                          |                                     |

- 1  
2  
3  
4  
5  
6  
7
- 4.1.16 ***If 'Wat is het meest bij u van toepassing ten aanzien van uw acitiviteit?' is equal to 'Tennis' answer this question:***  
Tennis  Professioneel  
 Competitief  
 Recreatief
- 8  
9  
10  
11  
12
- 4.1.17 ***If 'Wat is het meest bij u van toepassing ten aanzien van uw acitiviteit?' is equal to 'Worstelen' answer this question:***  
Worstelen  Professioneel  
 Competitief  
 Recreatief
- 13  
14  
15  
16  
17  
18
- 4.1.18 ***If 'Wat is het meest bij u van toepassing ten aanzien van uw acitiviteit?' is equal to 'Fitness, aerobics' answer this question:***  
Fitness, aerobics  Professioneel  
 Competitief  
 Recreatief
- 19  
20  
21  
22  
23  
24
- 4.1.19 ***If 'Wat is het meest bij u van toepassing ten aanzien van uw acitiviteit?' is equal to 'Badminton' answer this question:***  
Badminton  Professioneel  
 Competitief  
 Recreatief
- 25  
26  
27  
28  
29  
30
- 4.1.20 ***If 'Wat is het meest bij u van toepassing ten aanzien van uw acitiviteit?' is equal to 'Baseball' answer this question:***  
Baseball  Professioneel  
 Competitief  
 Recreatief
- 31  
32  
33  
34  
35
- 4.1.21 ***If 'Wat is het meest bij u van toepassing ten aanzien van uw acitiviteit?' is equal to 'Cross-country hardlopen' answer this question:***  
Cross-country hardlopen  Professioneel  
 Competitief  
 Recreatief
- 36  
37  
38  
39  
40  
41
- 4.1.22 ***If 'Wat is het meest bij u van toepassing ten aanzien van uw acitiviteit?' is equal to 'Moderne pentathlon' answer this question:***  
Moderne pentathlon  Professioneel  
 Competitief  
 Recreatief
- 42  
43  
44  
45  
46  
47
- 4.1.23 ***If 'Wat is het meest bij u van toepassing ten aanzien van uw acitiviteit?' is equal to 'Squash' answer this question:***  
Squash  Professioneel  
 Competitief  
 Recreatief
- 48  
49  
50  
51  
52  
53
- 4.1.24 ***If 'Wat is het meest bij u van toepassing ten aanzien van uw acitiviteit?' is equal to 'Surfen, windsurfen' answer this question:***  
Surfen, windsurfen  Professioneel  
 Competitief  
 Recreatief
- 54  
55  
56  
57  
58  
59  
60
- 4.1.25 ***If 'Wat is het meest bij u van toepassing ten aanzien van uw acitiviteit?' is equal to 'Tafel tennis' answer this question:***  
Tafel tennis  Professioneel  
 Competitief  
 Recreatief

- 1  
2  
3  
4  
5  
6  
7
- 
- 4.1.26 **If 'Wat is het meest bij u van toepassing ten aanzien van uw acitiviteit?' is equal to 'Atletiek: spring-, werponderdelen' answer this question:**  
Atletiek: spring-, werponderdelen  Professioneel  
 Competitief  
 Recreatief
- 
- 8  
9  
10  
11  
12
- 4.1.27 **If 'Wat is het meest bij u van toepassing ten aanzien van uw acitiviteit?' is equal to 'Waterskieën' answer this question:**  
Waterskien  Professioneel  
 Competitief  
 Recreatief
- 
- 13  
14  
15  
16  
17  
18
- 4.1.28 **If 'Wat is het meest bij u van toepassing ten aanzien van uw acitiviteit?' is equal to 'Dans' answer this question:**  
Dans  Professioneel  
 Competitief  
 Recreatief
- 
- 19  
20  
21  
22  
23  
24
- 4.1.29 **If 'Wat is het meest bij u van toepassing ten aanzien van uw acitiviteit?' is equal to 'Schermen' answer this question:**  
Schermen  Professioneel  
 Competitief  
 Recreatief
- 
- 25  
26  
27  
28  
29  
30
- 4.1.30 **If 'Wat is het meest bij u van toepassing ten aanzien van uw acitiviteit?' is equal to 'Zaalhockey' answer this question:**  
Zaalhockey  Professioneel  
 Competitief  
 Recreatief
- 
- 31  
32  
33  
34  
35
- 4.1.31 **If 'Wat is het meest bij u van toepassing ten aanzien van uw acitiviteit?' is equal to 'Bergbeklimmen' answer this question:**  
Bergbeklimmen  Professioneel  
 Competitief  
 Recreatief
- 
- 36  
37  
38  
39  
40  
41
- 4.1.32 **If 'Wat is het meest bij u van toepassing ten aanzien van uw acitiviteit?' is equal to 'Langlauf' answer this question:**  
Langlauf  Professioneel  
 Competitief  
 Recreatief
- 
- 42  
43  
44  
45  
46  
47
- 4.1.33 **If 'Wat is het meest bij u van toepassing ten aanzien van uw acitiviteit?' is equal to 'Parachute springen' answer this question:**  
Parachute springen  Professioneel  
 Competitief  
 Recreatief
- 
- 48  
49  
50  
51  
52  
53  
54  
55  
56  
57  
58  
59  
60
- 4.1.34 **If 'Wat is het meest bij u van toepassing ten aanzien van uw acitiviteit?' is equal to 'Softball' answer this question:**  
Softball  Professioneel  
 Competitief  
 Recreatief

- 1  
2  
3  
4  
5  
6  
7  
8  
9  
10  
11  
12
- 4.1.35 ***If 'Wat is het meest bij u van toepassing ten aanzien van uw acitiviteit?' is equal to 'Speciale beroepen en werkactiviteiten; speciale beroepen: ballet, professioneel soldaat, speciale reddingswerker, stuntman, etc.'* answer this question:**  
Speciale beroepen en werkactiviteiten speciale beroepen: ballet, professioneel soldaat, speciale reddingswerker, stuntman, etc.
- ballet, professioneel soldaat, speciale reddingswerker, stuntman, etc.
- 
- 13  
14  
15  
16  
17
- 4.1.36 ***If 'Wat is het meest bij u van toepassing ten aanzien van uw acitiviteit?' is equal to 'Duiken' answer this question:***  
Duiken
- Professioneel/competitief  
 Recreatief
- 
- 18  
19  
20  
21  
22
- 4.1.37 ***If 'Wat is het meest bij u van toepassing ten aanzien van uw acitiviteit?' is equal to 'Scubaduiken' answer this question:***  
Scubaduiken
- Professioneel/competitief  
 Recreatief
- 
- 23  
24  
25  
26  
27  
28
- 4.1.38 ***If 'Wat is het meest bij u van toepassing ten aanzien van uw acitiviteit?' is equal to 'Skaten, in-line skaten' answer this question:***  
skaten, in-linen skaten
- Professioneel/competitief  
 Recreatief
- 
- 29  
30  
31  
32  
33
- 4.1.39 ***If 'Wat is het meest bij u van toepassing ten aanzien van uw acitiviteit?' is equal to 'Atletiek: looponderdelen' answer this question:***  
Atletiek: looponderdelen
- Professioneel/competitief  
 Recreatief
- 
- 34  
35  
36  
37  
38
- 4.1.40 ***If 'Wat is het meest bij u van toepassing ten aanzien van uw acitiviteit?' is equal to 'Triatlon' answer this question:***  
triatlon
- Professioneel/competitief  
 Recreatief
- 
- 39  
40  
41  
42  
43  
44  
45
- 4.1.41 ***If 'Wat is het meest bij u van toepassing ten aanzien van uw acitiviteit?' is equal to 'Gewichtsheffen, body-building' answer this question:***  
Gewichtsheffen, body-building
- Professioneel/competitief  
 Recreatief
- 
- 46  
47  
48  
49  
50  
51  
52
- 4.1.42 ***If 'Wat is het meest bij u van toepassing ten aanzien van uw acitiviteit?' is equal to 'Alle competitieve sporten hieronder met 'seasonal' conditioning' answer this question:***  
Alle competitieve sporten hieronder met 'seasonal' conditioning
- Alle competitieve sporten hieronder met 'seasonal' conditioning
- 
- 53  
54  
55  
56  
57  
58  
59  
60
- 4.1.43 ***If 'Wat is het meest bij u van toepassing ten aanzien van uw acitiviteit?' is equal to 'Zwaar fysiek werk' answer this question:***  
Zwaar fysiek werk
- Alle competitieve sporten hieronder met 'seasonal' conditioning

- 1  
2  
3  
4  
5  
6  
7  
8  
9  
10  
11  
12  
13  
14  
15  
16  
17  
18  
19  
20  
21  
22  
23  
24  
25  
26  
27  
28  
29  
30  
31  
32  
33  
34  
35  
36  
37  
38  
39  
40  
41  
42  
43  
44  
45  
46  
47  
48  
49  
50  
51  
52  
53  
54  
55  
56  
57  
58  
59  
60
- 
- 4.1.44 ***If 'Wat is het meest bij u van toepassing ten aanzien van uw acitiviteit?' is equal to 'Alpine skiën en snowboarden' answer this question:***  
Alpine skien en snowboarden  Alpine skien en snowboarden
- 
- 4.1.45 ***If 'Wat is het meest bij u van toepassing ten aanzien van uw acitiviteit?' is equal to 'Bowlen/curlen' answer this question:***  
Bowlen/curlen  Bowlen/curlen
- 
- 4.1.46 ***If 'Wat is het meest bij u van toepassing ten aanzien van uw acitiviteit?' is equal to 'Golf' answer this question:***  
Golf  Golf
- 
- 4.1.47 ***If 'Wat is het meest bij u van toepassing ten aanzien van uw acitiviteit?' is equal to 'Mountainbike/BMX' answer this question:***  
Mountainbike/BMX  Mountainbike/BMX
- 
- 4.1.48 ***If 'Wat is het meest bij u van toepassing ten aanzien van uw acitiviteit?' is equal to 'Powerliften' answer this question:***  
Powerliften  Powerliften
- 
- 4.1.49 ***If 'Wat is het meest bij u van toepassing ten aanzien van uw acitiviteit?' is equal to 'Zeilen' answer this question:***  
Zeilen  Zeilen
- 
- 4.1.50 ***If 'Wat is het meest bij u van toepassing ten aanzien van uw acitiviteit?' is equal to 'Fysiek werk' answer this question:***  
Fysiek werk  Fysiek werk
- 
- 4.1.51 ***If 'Wat is het meest bij u van toepassing ten aanzien van uw acitiviteit?' is equal to 'Wielrennen' answer this question:***  
Wielrennen  Wielrennen
- 
- 4.1.52 ***If 'Wat is het meest bij u van toepassing ten aanzien van uw acitiviteit?' is equal to 'Paardrijden' answer this question:***  
Paardrijden  Paardrijden
- 
- 4.1.53 ***If 'Wat is het meest bij u van toepassing ten aanzien van uw acitiviteit?' is equal to 'Motorsporten/technische sporten' answer this question:***  
Motorsporten/technische sporten  Motorsporten/technische sporten
- 
- 4.1.54 ***If 'Wat is het meest bij u van toepassing ten aanzien van uw acitiviteit?' is equal to 'Roeien, kayakken' answer this question:***  
Roeien, kayakken  Roeien, kayakken

|        |                                                                                                                                                                                                                                                                                      |                                                                                                     |
|--------|--------------------------------------------------------------------------------------------------------------------------------------------------------------------------------------------------------------------------------------------------------------------------------------|-----------------------------------------------------------------------------------------------------|
| 4.1.55 | <b>If 'Wat is het meest bij u van toepassing ten aanzien van uw acitiviteit?' is equal to 'Boogschieten' answer this question:</b><br>Boogschieten                                                                                                                                   | <input type="radio"/> Boogschieten                                                                  |
| 4.1.56 | <b>If 'Wat is het meest bij u van toepassing ten aanzien van uw acitiviteit?' is equal to 'Water polo en zwemmen' answer this question:</b><br>Water polo en zwemmen                                                                                                                 | <input type="radio"/> Water polo en zwemmen                                                         |
| 4.1.57 | <b>If 'Wat is het meest bij u van toepassing ten aanzien van uw acitiviteit?' is equal to 'Kunnen lopen op oneven grond' answer this question:</b><br>Kunnen lopen op oneven grond                                                                                                   | <input type="radio"/> Kunnen lopen op oneven grond                                                  |
| 4.1.58 | <b>If 'Wat is het meest bij u van toepassing ten aanzien van uw acitiviteit?' is equal to 'Geen sport, echter geen limitatie in dagelijkse activiteiten' answer this question:</b><br>Geen sport, echter geen limitatie in dagelijkse activiteiten                                   | <input type="radio"/> Geen sport, echter geen limitatie in dagelijkse activiteiten                  |
| 4.1.59 | <b>If 'Wat is het meest bij u van toepassing ten aanzien van uw acitiviteit?' is equal to 'Kunnen lopen op even grond, maar de dagelijkste activiteiten zijn gelimiteerd' answer this question:</b><br>Kunnen lopen op even grond, maar de dagelijkste activiteiten zijn gelimiteerd | <input type="radio"/> Kunnen lopen op even grond, maar de dagelijkste activiteiten zijn gelimiteerd |
| 4.1.60 | <b>If 'Wat is het meest bij u van toepassing ten aanzien van uw acitiviteit?' is equal to 'Niet kunnen lopen, fysieke handicap wegens enkelproblemen' answer this question:</b><br>Niet kunnen lopen, fysieke handicap wegens enkelproblemen                                         | <input type="radio"/> Niet kunnen lopen, fysieke handicap wegens enkelproblemen                     |

## Vragenlijst PRIMA studie 26 weken - Hoe tevreden bent u over de enkelklachten?

| Number | Question                                   | Answers                                                                                                                       |
|--------|--------------------------------------------|-------------------------------------------------------------------------------------------------------------------------------|
| 5.1    | Hoe tevreden bent u over de enkelklachten? | <input type="radio"/> Slecht<br><input type="radio"/> Matig<br><input type="radio"/> Goed<br><input type="radio"/> Uitstekend |

## Vragenlijst PRIMA studie 26 weken - SF-36

| Number | Question                                                                                                                                                                                                                                                                                                                                                           | Answers                                                                                                                                                                                                                                                                                   |
|--------|--------------------------------------------------------------------------------------------------------------------------------------------------------------------------------------------------------------------------------------------------------------------------------------------------------------------------------------------------------------------|-------------------------------------------------------------------------------------------------------------------------------------------------------------------------------------------------------------------------------------------------------------------------------------------|
|        | Deze vragenlijst gaat over uw standpunten t.a.v. uw gezondheid. Met behulp van deze gegevens kan worden bijgehouden hoe u zich voelt en hoe goed u in staat bent uw gebruikelijke bezigheden uit te voeren. Beantwoord elke vraag door een antwoord aan te klikken. Als u niet zeker weet hoe u een vraag moet beantwoorden, geef dan het best mogelijke antwoord. |                                                                                                                                                                                                                                                                                           |
| 6.1    | Hoe zou u over het algemeen uw gezondheid noemen?                                                                                                                                                                                                                                                                                                                  | <input type="radio"/> Uitstekend <input type="radio"/> Zeer goed <input type="radio"/> Goed <input type="radio"/> Matig <input type="radio"/> Slecht                                                                                                                                      |
| 6.2    | Hoe beoordeelt u nu uw gezondheid over het algemeen vergeleken met een jaar geleden?                                                                                                                                                                                                                                                                               | <input type="radio"/> Veel beter dan een jaar geleden <input type="radio"/> Wat beter dan een jaar geleden <input type="radio"/> Ongeveer hetzelfde als een jaar geleden <input type="radio"/> Wat slechter dan een jaar geleden <input type="radio"/> Veel slechter dan een jaar geleden |
| 6.3    | Wordt u door uw gezondheid op dit moment beperkt bij forse inspanning, zoals hardlopen, tillen van zware voorwerpen of een veeleisende sport beoefenen?                                                                                                                                                                                                            | <input type="radio"/> Ja, ernstig beperkt <input type="radio"/> Ja, een beetje beperkt <input type="radio"/> Nee, helemaal niet beperkt                                                                                                                                                   |
| 6.4    | Wordt u door uw gezondheid op dit moment beperkt bij matige inspanning zoals een tafel verplaatsen, stofzuigen, zwemmen of fietsen?                                                                                                                                                                                                                                | <input type="radio"/> Ja, ernstig beperkt <input type="radio"/> Ja, een beetje beperkt <input type="radio"/> Nee, helemaal niet beperkt                                                                                                                                                   |
| 6.5    | Wordt u door uw gezondheid op dit moment beperkt bij boodschappen tillen of dragen?                                                                                                                                                                                                                                                                                | <input type="radio"/> Ja, ernstig beperkt <input type="radio"/> Ja, een beetje beperkt <input type="radio"/> Nee, helemaal niet beperkt                                                                                                                                                   |
| 6.6    | Wordt u door uw gezondheid op dit moment beperkt bij een paar trappen oplopen?                                                                                                                                                                                                                                                                                     | <input type="radio"/> Ja, ernstig beperkt <input type="radio"/> Ja, een beetje beperkt <input type="radio"/> Nee, helemaal niet beperkt                                                                                                                                                   |
| 6.7    | Wordt u door uw gezondheid op dit moment beperkt bij één trap oplopen?                                                                                                                                                                                                                                                                                             | <input type="radio"/> Ja, ernstig beperkt <input type="radio"/> Ja, een beetje beperkt <input type="radio"/> Nee, helemaal niet beperkt                                                                                                                                                   |
| 6.8    | Wordt u door uw gezondheid op dit moment beperkt bij bukken, knielen of hurken?                                                                                                                                                                                                                                                                                    | <input type="radio"/> Ja, ernstig beperkt <input type="radio"/> Ja, een beetje beperkt <input type="radio"/> Nee, helemaal niet beperkt                                                                                                                                                   |
| 6.9    | Wordt u door uw gezondheid op dit moment beperkt bij meer dan één kilometer lopen?                                                                                                                                                                                                                                                                                 | <input type="radio"/> Ja, ernstig beperkt <input type="radio"/> Ja, een beetje beperkt <input type="radio"/> Nee, helemaal niet beperkt                                                                                                                                                   |
| 6.10   | Wordt u door uw gezondheid op dit moment beperkt bij een paar honderd meter lopen?                                                                                                                                                                                                                                                                                 | <input type="radio"/> Ja, ernstig beperkt <input type="radio"/> Ja, een beetje beperkt <input type="radio"/> Nee, helemaal niet beperkt                                                                                                                                                   |



- 1  
2  
3  
4  
5  
6  
7  
8  
9  
10  
11  
12  
13  
14  
15  
16  
17  
18  
19  
20  
21  
22  
23  
24  
25  
26  
27  
28  
29  
30  
31  
32  
33  
34  
35  
36  
37  
38  
39  
40  
41  
42  
43  
44  
45  
46  
47  
48  
49  
50  
51  
52  
53  
54  
55  
56  
57  
58  
59  
60
- 
- 6.11 Wordt u door uw gezondheid op dit moment beperkt bij ongeveer honderd meter lopen?  Ja, ernstig beperkt  Ja, een beetje beperkt  Nee, helemaal niet beperkt
- 
- 6.12 Wordt u door uw gezondheid op dit moment beperkt bij uzelf wassen of aankleden?  Ja, ernstig beperkt  Ja, een beetje beperkt  Nee, helemaal niet beperkt
- 
- 6.13 U besteedde in de afgelopen 4 weken minder tijd aan werk of andere bezigheden  Ja  Nee
- 
- 6.14 U heeft in de afgelopen 4 weken minder bereikt dan u zou willen  Ja  Nee
- 
- 6.15 U was in de afgelopen 4 weken beperkt in het soort werk of andere bezigheden.  Ja  Nee
- 
- 6.16 U had de afgelopen 4 weken moeite om uw werk of andere bezigheden uit te voeren (het kostte u bijvoorbeeld extra inspanning).  Ja  Nee
- 
- 6.17 U besteedde in de afgelopen 4 weken minder tijd aan werk of andere bezigheden ten gevolge van emotionele problemen  Ja  Nee
- 
- 6.18 U heeft in de afgelopen 4 weken minder bereikt dan u zou willen ten gevolge van emotionele problemen.  Ja  Nee
- 
- 6.19 U deed de afgelopen 4 weken uw werk of andere bezigheden niet zo zorgvuldig als gewoonlijk ten gevolge van emotionele problemen.  Ja  Nee
- 
- 6.20 In hoeverre hebben uw lichamelijke gezondheid of emotionele problemen u gedurende de afgelopen 4 weken gehinderd in uw normale omgang met familie, vrienden of burens, of bij activiteiten in groepsverband?  Helemaal niet  Enigszins  Nogal  Veel  Heel erg veel
- 
- 6.21 Hoeveel lichamelijke pijn heeft u de afgelopen 4 weken gehad?  Geen  Heel licht  Licht  Nogal  Ernstig  Heel ernstig
- 
- 6.22 In welke mate bent u de afgelopen 4 weken door de pijn gehinderd in uw normale werk (zowel werk buitenshuis als huishoudelijk werk)?  Helemaal niet  Een klein beetje  Nogal  Veel  Heel erg veel

1  
2 6.23 Voelde u zich levenslustig?  Altijd  
3  Meestal  
4  Vaak  
5  Soms  
6  Zelden  
7  Nooit  
8  
9  
10

---

11 6.24 Was u erg zenuwachtig?  Altijd  
12  Meestal  
13  Vaak  
14  Soms  
15  Zelden  
16  Nooit  
17  
18  
19  
20

---

21 6.25 Zat u zo in de put dat u niets kon?  Altijd  
22  Meestal  
23  Vaak  
24  Soms  
25  Zelden  
26  Nooit  
27  
28  
29  
30

---

31 6.26 Voelde u zich rustig en tevreden?  Altijd  
32  Meestal  
33  Vaak  
34  Soms  
35  Zelden  
36  Nooit  
37  
38  
39  
40

---

41 6.27 Had u veel energie?  Altijd  
42  Meestal  
43  Vaak  
44  Soms  
45  Zelden  
46  Nooit  
47  
48  
49  
50

---

51 6.28 Voelde u zich somber en neerslachtig?  Altijd  
52  Meestal  
53  Vaak  
54  Soms  
55  Zelden  
56  Nooit  
57  
58  
59  
60

1  
2  
3  
4  
5  
6  
7  
8  
9  
10  
11  
12  
13  
14  
15  
16  
17  
18  
19  
20  
21  
22  
23  
24  
25  
26  
27  
28  
29  
30  
31  
32  
33  
34  
35  
36  
37  
38  
39  
40  
41  
42  
43  
44  
45  
46  
47  
48  
49  
50  
51  
52  
53  
54  
55  
56  
57  
58  
59  
60

---

|      |                         |                               |
|------|-------------------------|-------------------------------|
| 6.29 | Voelde u zich uitgeput? | <input type="radio"/> Altijd  |
|      |                         | <input type="radio"/> Meestal |
|      |                         | <input type="radio"/> Vaak    |
|      |                         | <input type="radio"/> Soms    |
|      |                         | <input type="radio"/> Zelden  |
|      |                         | <input type="radio"/> Nooit   |

---

|      |                          |                               |
|------|--------------------------|-------------------------------|
| 6.30 | Was u een gelukkig mens? | <input type="radio"/> Altijd  |
|      |                          | <input type="radio"/> Meestal |
|      |                          | <input type="radio"/> Vaak    |
|      |                          | <input type="radio"/> Soms    |
|      |                          | <input type="radio"/> Zelden  |
|      |                          | <input type="radio"/> Nooit   |

---

|      |                    |                               |
|------|--------------------|-------------------------------|
| 6.31 | Voelde u zich moe? | <input type="radio"/> Altijd  |
|      |                    | <input type="radio"/> Meestal |
|      |                    | <input type="radio"/> Vaak    |
|      |                    | <input type="radio"/> Soms    |
|      |                    | <input type="radio"/> Zelden  |
|      |                    | <input type="radio"/> Nooit   |

---

|      |                                                                                                                                                                                      |                               |
|------|--------------------------------------------------------------------------------------------------------------------------------------------------------------------------------------|-------------------------------|
| 6.32 | Hoe vaak hebben uw lichamelijke gezondheid of emotionele problemen u gedurende de afgelopen 4 weken gehinderd bij uw sociale activiteiten (zoals vrienden of familie bezoeken etc.)? | <input type="radio"/> Altijd  |
|      |                                                                                                                                                                                      | <input type="radio"/> Meestal |
|      |                                                                                                                                                                                      | <input type="radio"/> Soms    |
|      |                                                                                                                                                                                      | <input type="radio"/> Zelden  |
|      |                                                                                                                                                                                      | <input type="radio"/> Nooit   |

---

|      |                                                            |                                           |
|------|------------------------------------------------------------|-------------------------------------------|
| 6.33 | Ik lijk wat gemakkelijker ziek te worden dan andere mensen | <input type="radio"/> Volkomen juist      |
|      |                                                            | <input type="radio"/> Grotendeels juist   |
|      |                                                            | <input type="radio"/> Weet ik niet        |
|      |                                                            | <input type="radio"/> Grotendeels onjuist |
|      |                                                            | <input type="radio"/> Volkomen onjuist    |

---

|      |                                                 |                                           |
|------|-------------------------------------------------|-------------------------------------------|
| 6.34 | Ik ben even gezond als andere mensen die ik ken | <input type="radio"/> Volkomen juist      |
|      |                                                 | <input type="radio"/> Grotendeels juist   |
|      |                                                 | <input type="radio"/> Weet ik niet        |
|      |                                                 | <input type="radio"/> Grotendeels onjuist |
|      |                                                 | <input type="radio"/> Volkomen onjuist    |

- 1  
2  
3  
4  
5  
6  
7  
8  
9
- 
- 6.35 Ik verwacht dat mijn gezondheid achteruit zal gaan
- Volkomen juist
  - Grotendeels juist
  - Weet ik niet
  - Grotendeels onjuist
  - Volkomen onjuist
- 

- 10  
11  
12  
13  
14  
15  
16  
17  
18  
19  
20  
21  
22
- 6.36 Mijn gezondheid is uitstekend
- Volkomen juist
  - Grotendeels juist
  - Weet ik niet
  - Grotendeels onjuist
  - Volkomen onjuist

## Vragenlijst PRIMA studie 26 weken - GAS

| Number | Question                                                                                                                                                                                  | Answers                                                                                                                                                                                                                                                                                                                                                              |
|--------|-------------------------------------------------------------------------------------------------------------------------------------------------------------------------------------------|----------------------------------------------------------------------------------------------------------------------------------------------------------------------------------------------------------------------------------------------------------------------------------------------------------------------------------------------------------------------|
|        | Tijdens de eerste afspraak werd een duidelijk doel met u afgesproken. Dit werd tevens per email naar u gestuurd. Hoe is de situatie nu ten aanzien van de destijds gestelde doelstelling? |                                                                                                                                                                                                                                                                                                                                                                      |
| 7.1    | Wat is nu de situatie ten aanzien van het tijdens de eerste afspraak afgesproken doelstelling (Goal attainment Scaling)?                                                                  | <ul style="list-style-type: none"> <li><input type="radio"/> Achteruitgang (minder dan de uitgangssituatie)</li> <li><input type="radio"/> Uitgangssituatie</li> <li><input type="radio"/> Minder dan het doel</li> <li><input type="radio"/> Doel</li> <li><input type="radio"/> Meer dan het doel</li> <li><input type="radio"/> Veel meer dan het doel</li> </ul> |

## Vragenlijst PRIMA studie 26 weken - EQ-5D-3L

| Number | Question                                                                                                                                                                                                                                                                                                                                                           | Answers                                                                                                                                                                                                                  |
|--------|--------------------------------------------------------------------------------------------------------------------------------------------------------------------------------------------------------------------------------------------------------------------------------------------------------------------------------------------------------------------|--------------------------------------------------------------------------------------------------------------------------------------------------------------------------------------------------------------------------|
|        | Deze vragenlijst gaat over uw standpunten t.a.v. uw gezondheid. Met behulp van deze gegevens kan worden bijgehouden hoe u zich voelt en hoe goed u in staat bent uw gebruikelijke bezigheden uit te voeren. Beantwoord elke vraag door een antwoord aan te klikken. Als u niet zeker weet hoe u een vraag moet beantwoorden, geef dan het best mogelijke antwoord. |                                                                                                                                                                                                                          |
| 8.1    | Hoe is het met uw Mobiliteit gesteld?                                                                                                                                                                                                                                                                                                                              | <ul style="list-style-type: none"> <li><input type="radio"/> Ik heb geen problemen met lopen</li> <li><input type="radio"/> Ik heb enige problemen met lopen</li> <li><input type="radio"/> Ik ben bedlegerig</li> </ul> |

|                                                                                                                                                                                                                                            |                                                                                                                  |                                                                                                                                                                                                                                                             |
|--------------------------------------------------------------------------------------------------------------------------------------------------------------------------------------------------------------------------------------------|------------------------------------------------------------------------------------------------------------------|-------------------------------------------------------------------------------------------------------------------------------------------------------------------------------------------------------------------------------------------------------------|
| 8.2                                                                                                                                                                                                                                        | Hoe is het met uw Zelfzorg gesteld?                                                                              | <input type="radio"/> Ik heb geen problemen om mijzelf te wassen of aan te kleden<br><input type="radio"/> Ik heb enige problemen om mijzelf te wassen of aan te kleden<br><input type="radio"/> Ik ben niet in staat om mijzelf te wassen of aan te kleden |
| 8.3                                                                                                                                                                                                                                        | Hoe is het met de Dagelijkse activiteiten (werk, studie, huishouden, gezins- en vrijetijdsactiviteiten) gesteld? | <input type="radio"/> Ik heb geen problemen met mijn dagelijkse activiteiten<br><input type="radio"/> Ik heb enige problemen met mijn dagelijkse activiteiten<br><input type="radio"/> Ik ben niet in staat om mijn dagelijkse activiteiten uit te voeren   |
| 8.4                                                                                                                                                                                                                                        | Hoe is het met de Pijn/klachten gesteld?                                                                         | <input type="radio"/> Ik heb geen pijn of andere klachten<br><input type="radio"/> Ik heb matige pijn of andere klachten<br><input type="radio"/> Ik heb zeer ernstige pijn of andere klachten                                                              |
| 8.5                                                                                                                                                                                                                                        | Hoe is het met de Stemming gesteld?                                                                              | <input type="radio"/> Ik ben niet angstig of somber<br><input type="radio"/> Ik ben matig angstig of somber<br><input type="radio"/> Ik ben erg angstig of somber                                                                                           |
| <p>We willen weten hoe goed of slecht uw gezondheid VANDAAG is. Deze meetschaal loopt van 0 tot 100: 100 staat voor de BESTE gezondheid die u zich kunt voorstellen - 0 staat voor de SLECHTSTE gezondheid die u zich kunt voorstellen</p> |                                                                                                                  |                                                                                                                                                                                                                                                             |
| 8.6                                                                                                                                                                                                                                        | Uw Gezondheid vandaag                                                                                            | (0.00) (100.00)                                                                                                                                                                                                                                             |

## Vragenlijst PRIMA studie 26 weken - AOS

| Number                                                                                                                                                                                                                                                                                                                                                                                                               | Question                                                   | Answers                                                                                            |
|----------------------------------------------------------------------------------------------------------------------------------------------------------------------------------------------------------------------------------------------------------------------------------------------------------------------------------------------------------------------------------------------------------------------|------------------------------------------------------------|----------------------------------------------------------------------------------------------------|
| <p>Instructies: De lijn naast elke vraag staat voor hoeveel PIJN u heeft in verschillende situaties. De linker kant (0) is "geen pijn" en de rechter kant (100) is "ergste pijn denkbaar". Geef voor de onderstaande situaties op de lijn aan hoeveel PIJN u in de afgelopen week in de enkel had. Als een of meerdere van deze situaties niet van toepassing waren, dan kiest u de "niet van toepassing" optie.</p> |                                                            |                                                                                                    |
| 9.1                                                                                                                                                                                                                                                                                                                                                                                                                  | Wat was de hoogte van de ergste pijn in de afgelopen week? | (0.00) (100.00)                                                                                    |
| 9.2                                                                                                                                                                                                                                                                                                                                                                                                                  | Heeft u pijn als u 's ochtends opstaat?                    | <input type="radio"/> Ja<br><input type="radio"/> Nee<br><input type="radio"/> Niet van toepassing |

|    |       |                                                                                                                     |                                           |
|----|-------|---------------------------------------------------------------------------------------------------------------------|-------------------------------------------|
| 1  |       |                                                                                                                     |                                           |
| 2  | 9.2.1 | <b><i>If 'Heeft u pijn als u 's ochtends opstaat?' is equal to 'Ja' answer this question:</i></b>                   | (0.00) (100.00)                           |
| 3  |       | Hoeveel pijn heeft u voordat u 's ochtends opstaat?                                                                 |                                           |
| 4  |       |                                                                                                                     |                                           |
| 5  |       |                                                                                                                     |                                           |
| 6  | 9.3   | Heeft u pijn wanneer u op blote voeten loopt?                                                                       | <input type="radio"/> Ja                  |
| 7  |       |                                                                                                                     | <input type="radio"/> Nee                 |
| 8  |       |                                                                                                                     | <input type="radio"/> Niet van toepassing |
| 9  |       |                                                                                                                     |                                           |
| 10 |       |                                                                                                                     |                                           |
| 11 |       |                                                                                                                     |                                           |
| 12 | 9.3.1 | <b><i>If 'Heeft u pijn wanneer u op blote voeten loopt?' is equal to 'Ja' answer this question:</i></b>             | (0.00) (100.00)                           |
| 13 |       | Hoeveel pijn heeft u als u op blote voeten loopt?                                                                   |                                           |
| 14 |       |                                                                                                                     |                                           |
| 15 |       |                                                                                                                     |                                           |
| 16 | 9.4   | Heeft u pijn wanneer u op blote voeten staat?                                                                       | <input type="radio"/> Ja                  |
| 17 |       |                                                                                                                     | <input type="radio"/> Nee                 |
| 18 |       |                                                                                                                     | <input type="radio"/> Niet van toepassing |
| 19 |       |                                                                                                                     |                                           |
| 20 |       |                                                                                                                     |                                           |
| 21 |       |                                                                                                                     |                                           |
| 22 | 9.4.1 | <b><i>If 'Heeft u pijn wanneer u op blote voeten staat?' is equal to 'Ja' answer this question:</i></b>             | (0.00) (100.00)                           |
| 23 |       | Hoeveel pijn heeft u als u op blote voeten staat?                                                                   |                                           |
| 24 |       |                                                                                                                     |                                           |
| 25 |       |                                                                                                                     |                                           |
| 26 | 9.5   | Heeft u pijn wanneer u met schoenen loopt?                                                                          | <input type="radio"/> Ja                  |
| 27 |       |                                                                                                                     | <input type="radio"/> Nee                 |
| 28 |       |                                                                                                                     | <input type="radio"/> Niet van toepassing |
| 29 |       |                                                                                                                     |                                           |
| 30 |       |                                                                                                                     |                                           |
| 31 |       |                                                                                                                     |                                           |
| 32 | 9.5.1 | <b><i>If 'Heeft u pijn wanneer u met schoenen loopt?' is equal to 'Ja' answer this question:</i></b>                | (0.00) (100.00)                           |
| 33 |       | Hoeveel pijn heeft u wanneer u met schoenen loopt?                                                                  |                                           |
| 34 |       |                                                                                                                     |                                           |
| 35 |       |                                                                                                                     |                                           |
| 36 | 9.6   | Heeft u pijn wanneer u met schoenen staat?                                                                          | <input type="radio"/> Ja                  |
| 37 |       |                                                                                                                     | <input type="radio"/> Nee                 |
| 38 |       |                                                                                                                     | <input type="radio"/> Niet van toepassing |
| 39 |       |                                                                                                                     |                                           |
| 40 |       |                                                                                                                     |                                           |
| 41 |       |                                                                                                                     |                                           |
| 42 | 9.6.1 | <b><i>If 'Heeft u pijn wanneer u met schoenen staat?' is equal to 'Ja' answer this question:</i></b>                | (0.00) (100.00)                           |
| 43 |       | Hoeveel pijn heeft u wanneer u met schoenen staat?                                                                  |                                           |
| 44 |       |                                                                                                                     |                                           |
| 45 |       |                                                                                                                     |                                           |
| 46 | 9.7   | Heeft u pijn wanneer u loopt met steunzolen of een brace?                                                           | <input type="radio"/> Ja                  |
| 47 |       |                                                                                                                     | <input type="radio"/> Nee                 |
| 48 |       |                                                                                                                     | <input type="radio"/> Niet van toepassing |
| 49 |       |                                                                                                                     |                                           |
| 50 |       |                                                                                                                     |                                           |
| 51 |       |                                                                                                                     |                                           |
| 52 | 9.7.1 | <b><i>If 'Heeft u pijn wanneer u loopt met steunzolen of een brace?' is equal to 'Ja' answer this question:</i></b> | (0.00) (100.00)                           |
| 53 |       | Hoeveel pijn heeft u wanneer u loopt met steunzolen of een brace?                                                   |                                           |
| 54 |       |                                                                                                                     |                                           |
| 55 |       |                                                                                                                     |                                           |
| 56 |       |                                                                                                                     |                                           |
| 57 |       |                                                                                                                     |                                           |
| 58 |       |                                                                                                                     |                                           |
| 59 |       |                                                                                                                     |                                           |
| 60 |       |                                                                                                                     |                                           |

1  
2  
3  
4  
5  
6  
7  
8  
9  
10  
11  
12  
13  
14  
15  
16  
17  
18  
19  
20  
21  
22  
23  
24  
25  
26  
27  
28  
29  
30  
31  
32  
33  
34  
35  
36  
37  
38  
39  
40  
41  
42  
43  
44  
45  
46  
47  
48  
49  
50  
51  
52  
53  
54  
55  
56  
57  
58  
59  
60

|                                                                                                                                                                                                                                                                                                                                                                                                                                                      |                                                                                                                                                                                   |                                                                                                    |        |          |
|------------------------------------------------------------------------------------------------------------------------------------------------------------------------------------------------------------------------------------------------------------------------------------------------------------------------------------------------------------------------------------------------------------------------------------------------------|-----------------------------------------------------------------------------------------------------------------------------------------------------------------------------------|----------------------------------------------------------------------------------------------------|--------|----------|
| 9.8                                                                                                                                                                                                                                                                                                                                                                                                                                                  | Heeft u pijn wanneer u staat met steunzolen of een brace?                                                                                                                         | <input type="radio"/> Ja<br><input type="radio"/> Nee<br><input type="radio"/> Niet van toepassing |        |          |
| 9.8.1                                                                                                                                                                                                                                                                                                                                                                                                                                                | <b>If 'Heeft u pijn wanneer u staat met steunzolen of een brace?' is equal to 'Ja' answer this question:</b><br>Hoeveel pijn heeft u wanneer u staat met steunzolen of een brace? |                                                                                                    | (0.00) | (100.00) |
| 9.9                                                                                                                                                                                                                                                                                                                                                                                                                                                  | Heeft u pijn aan het einde van de dag?                                                                                                                                            | <input type="radio"/> Ja<br><input type="radio"/> Nee<br><input type="radio"/> Niet van toepassing |        |          |
| 9.9.1                                                                                                                                                                                                                                                                                                                                                                                                                                                | <b>If 'Heeft u pijn aan het einde van de dag?' is equal to 'Ja' answer this question:</b><br>Hoeveel pijn heeft u aan het einde van de dag?                                       |                                                                                                    | (0.00) | (100.00) |
| <p>Instructies:De lijn naast elke vraag staat voor hoeveel MOEITE u heeft met verschillende activiteiten. De linker kant (0) is "Niet moeilijk" en de rechter kant (100) is "Te moeilijk, niet uitvoerbaar". Geef voor de onderstaande activiteiten op de lijn aan hoeveel MOEITE u in de afgelopen week door enkelklachten had met onderstaande activiteiten. Als een situatie niet van toepassing is, kies dan de optie "niet van toepassing".</p> |                                                                                                                                                                                   |                                                                                                    |        |          |
| 9.10                                                                                                                                                                                                                                                                                                                                                                                                                                                 | Heeft u moeite met door het huis lopen?                                                                                                                                           | <input type="radio"/> Ja<br><input type="radio"/> Nee<br><input type="radio"/> Niet van toepassing |        |          |
| 9.10.1                                                                                                                                                                                                                                                                                                                                                                                                                                               | <b>If 'Heeft u moeite met door het huis lopen?' is equal to 'Ja' answer this question:</b><br>Hoeveel moeite heeft u met door het huis lopen?                                     |                                                                                                    | (0.00) | (100.00) |
| 9.11                                                                                                                                                                                                                                                                                                                                                                                                                                                 | Heeft u moeite met buiten lopen op oneven ondergrond?                                                                                                                             | <input type="radio"/> Ja<br><input type="radio"/> Nee<br><input type="radio"/> Niet van toepassing |        |          |
| 9.11.1                                                                                                                                                                                                                                                                                                                                                                                                                                               | <b>If 'Heeft u moeite met buiten lopen op oneven ondergrond?' is equal to 'Ja' answer this question:</b><br>Hoeveel moeite heeft u met buiten lopen op oneven ondergrond?         |                                                                                                    | (0.00) | (100.00) |
| 9.12                                                                                                                                                                                                                                                                                                                                                                                                                                                 | Heeft u moeite met een paar honderd meter lopen?                                                                                                                                  | <input type="radio"/> Ja<br><input type="radio"/> Nee<br><input type="radio"/> Niet van toepassing |        |          |
| 9.12.1                                                                                                                                                                                                                                                                                                                                                                                                                                               | <b>If 'Heeft u moeite met een paar honderd meter lopen?' is equal to 'Ja' answer this question:</b><br>Hoeveel moeite heeft u met een paar honderd meter lopen?                   |                                                                                                    | (0.00) | (100.00) |

|    |        |                                                                                                             |                                           |          |
|----|--------|-------------------------------------------------------------------------------------------------------------|-------------------------------------------|----------|
| 1  |        |                                                                                                             |                                           |          |
| 2  | 9.13   | Heeft u moeite met een trap oplopen?                                                                        | <input type="radio"/> Ja                  |          |
| 3  |        |                                                                                                             | <input type="radio"/> Nee                 |          |
| 4  |        |                                                                                                             | <input type="radio"/> Niet van toepassing |          |
| 5  |        |                                                                                                             |                                           |          |
| 6  |        |                                                                                                             |                                           |          |
| 7  |        |                                                                                                             |                                           |          |
| 8  | 9.13.1 | <b>If 'Heeft u moeite met een trap oplopen?' is equal to 'Ja' answer this question:</b>                     | (0.00)                                    | (100.00) |
| 9  |        | Hoeveel moeite heeft u met een trap oplopen?                                                                |                                           |          |
| 10 |        |                                                                                                             |                                           |          |
| 11 |        |                                                                                                             |                                           |          |
| 12 | 9.14   | Heeft u moeite met een trap aflopen?                                                                        | <input type="radio"/> Ja                  |          |
| 13 |        |                                                                                                             | <input type="radio"/> Nee                 |          |
| 14 |        |                                                                                                             | <input type="radio"/> Niet van toepassing |          |
| 15 |        |                                                                                                             |                                           |          |
| 16 |        |                                                                                                             |                                           |          |
| 17 |        |                                                                                                             |                                           |          |
| 18 | 9.14.1 | <b>If 'Heeft u moeite met een trap aflopen?' is equal to 'Ja' answer this question:</b>                     | (0.00)                                    | (100.00) |
| 19 |        | Hoeveel moeite heeft u met een trap aflopen?                                                                |                                           |          |
| 20 |        |                                                                                                             |                                           |          |
| 21 |        |                                                                                                             |                                           |          |
| 22 | 9.15   | Heeft u moeite met op de tenen staan?                                                                       | <input type="radio"/> Ja                  |          |
| 23 |        |                                                                                                             | <input type="radio"/> Nee                 |          |
| 24 |        |                                                                                                             | <input type="radio"/> Niet van toepassing |          |
| 25 |        |                                                                                                             |                                           |          |
| 26 |        |                                                                                                             |                                           |          |
| 27 |        |                                                                                                             |                                           |          |
| 28 | 9.15.1 | <b>If 'Heeft u moeite met op de tenen staan?' is equal to 'Ja' answer this question:</b>                    | (0.00)                                    | (100.00) |
| 29 |        | Hoeveel moeite heeft u met op de tenen staan?                                                               |                                           |          |
| 30 |        |                                                                                                             |                                           |          |
| 31 |        |                                                                                                             |                                           |          |
| 32 | 9.16   | Heeft u moeite met opstaan uit de stoel?                                                                    | <input type="radio"/> Ja                  |          |
| 33 |        |                                                                                                             | <input type="radio"/> Nee                 |          |
| 34 |        |                                                                                                             | <input type="radio"/> Niet van toepassing |          |
| 35 |        |                                                                                                             |                                           |          |
| 36 |        |                                                                                                             |                                           |          |
| 37 |        |                                                                                                             |                                           |          |
| 38 | 9.16.1 | <b>If 'Heeft u moeite met opstaan uit de stoel?' is equal to 'Ja' answer this question:</b>                 | (0.00)                                    | (100.00) |
| 39 |        | Hoeveel moeite heeft u met opstaan uit de stoel?                                                            |                                           |          |
| 40 |        |                                                                                                             |                                           |          |
| 41 |        |                                                                                                             |                                           |          |
| 42 | 9.17   | Heeft u moeite met het op- of afstappen van stoepranden?                                                    | <input type="radio"/> Ja                  |          |
| 43 |        |                                                                                                             | <input type="radio"/> Nee                 |          |
| 44 |        |                                                                                                             | <input type="radio"/> Niet van toepassing |          |
| 45 |        |                                                                                                             |                                           |          |
| 46 |        |                                                                                                             |                                           |          |
| 47 |        |                                                                                                             |                                           |          |
| 48 | 9.17.1 | <b>If 'Heeft u moeite met het op- of afstappen van stoepranden?' is equal to 'Ja' answer this question:</b> | (0.00)                                    | (100.00) |
| 49 |        | Hoeveel moeite heeft u met het op- of afstappen van stoepranden?                                            |                                           |          |
| 50 |        |                                                                                                             |                                           |          |
| 51 |        |                                                                                                             |                                           |          |
| 52 |        |                                                                                                             |                                           |          |
| 53 |        |                                                                                                             |                                           |          |
| 54 | 9.18   | Heeft u moeite met snel lopen of rennen?                                                                    | <input type="radio"/> Ja                  |          |
| 55 |        |                                                                                                             | <input type="radio"/> Nee                 |          |
| 56 |        |                                                                                                             | <input type="radio"/> Niet van toepassing |          |
| 57 |        |                                                                                                             |                                           |          |
| 58 |        |                                                                                                             |                                           |          |
| 59 |        |                                                                                                             |                                           |          |
| 60 |        |                                                                                                             |                                           |          |



9.18.1 ***If 'Heeft u moeite met snel lopen of rennen?' is equal to 'Ja' answer this question:*** (0.00) (100.00)  
 Hoeveel moeite heeft u met snel lopen of rennen?

## Vragenlijst PRIMA studie 26 weken - FAOS

| Number | Question                                                                                                                                                                                                                                                                                                                                                                                                                                                                                                                                                                            | Answers                                                                                                                                                    |
|--------|-------------------------------------------------------------------------------------------------------------------------------------------------------------------------------------------------------------------------------------------------------------------------------------------------------------------------------------------------------------------------------------------------------------------------------------------------------------------------------------------------------------------------------------------------------------------------------------|------------------------------------------------------------------------------------------------------------------------------------------------------------|
|        | Deze lijst vraagt naar uw mening over uw voet/enkel. Uw antwoorden geven ons een beeld van uw voet/enkel klachten en hoe u in staat bent om alledaagse activiteiten uit te voeren in uw huidige situatie. Beantwoorden van een vraag doet u door het aanklikken van een vakje met het volgens u meest juiste antwoord (één vakje per vraag). Als u niet zeker weet hoe u een vraag moet beantwoorden, geeft u dan het antwoord dat volgens u het meest op uw situatie van toepassing is. Deze vraag heeft betrekking op het voorkomen van voet/enkel klachten in de afgelopen week. |                                                                                                                                                            |
| 10.1   | Is uw voet/enkel gezwollen?                                                                                                                                                                                                                                                                                                                                                                                                                                                                                                                                                         | <input type="radio"/> Nooit <input type="radio"/> Zelden <input type="radio"/> Soms <input type="radio"/> Vaak <input type="radio"/> Altijd                |
| 10.2   | Voelt u gekraak of hoort u klikken of een ander vreemd geluid wanneer u de voet/enkel beweegt?                                                                                                                                                                                                                                                                                                                                                                                                                                                                                      | <input type="radio"/> Nooit <input type="radio"/> Zelden <input type="radio"/> Soms <input type="radio"/> Vaak <input type="radio"/> Altijd                |
| 10.3   | Hapert uw enkel of blokkeert uw enkel ('op slot' gaan zitten) wanneer u deze beweegt?                                                                                                                                                                                                                                                                                                                                                                                                                                                                                               | <input type="radio"/> Nooit <input type="radio"/> Zelden <input type="radio"/> Soms <input type="radio"/> Vaak <input type="radio"/> Altijd                |
| 10.4   | Kunt u de voet/enkel volledig strekken?                                                                                                                                                                                                                                                                                                                                                                                                                                                                                                                                             | <input type="radio"/> Altijd <input type="radio"/> Vaak <input type="radio"/> Soms <input type="radio"/> Zelden <input type="radio"/> Nooit                |
| 10.5   | Kunt u de voet volledig naar u toe buigen?                                                                                                                                                                                                                                                                                                                                                                                                                                                                                                                                          | <input type="radio"/> Altijd <input type="radio"/> Vaak <input type="radio"/> Soms <input type="radio"/> Zelden <input type="radio"/> Nooit                |
| 10.6   | In welke mate heeft u een stijf gevoel in de voet/enkel 's ochtends bij het wakker worden?                                                                                                                                                                                                                                                                                                                                                                                                                                                                                          | <input type="radio"/> Niet Ernstig <input type="radio"/> Mild <input type="radio"/> Matig <input type="radio"/> Zeer ernstig                               |
| 10.7   | In welke mate heeft u een stijf gevoel in de voet/enkel na zitten, liggen of rusten later op de dag?                                                                                                                                                                                                                                                                                                                                                                                                                                                                                | <input type="radio"/> Niet Ernstig <input type="radio"/> Mild <input type="radio"/> Matig <input type="radio"/> Zeer ernstig                               |
| 10.8   | Hoe vaak heeft u pijn in uw voet/enkel?                                                                                                                                                                                                                                                                                                                                                                                                                                                                                                                                             | <input type="radio"/> Nooit <input type="radio"/> Maandelijks <input type="radio"/> Wekelijks <input type="radio"/> Dagelijks <input type="radio"/> Altijd |

1  
2  
3  
4  
5  
6  
7  
8  
9

---

10.9 Hoeveel voet/enkel pijn heeft u gehad in de afgelopen week bij draaien als uw voet/enkel op de grond staat?

Geen  
 Mild  
 Matig  
 Ernstig  
 Zeer ernstig

---

10  
11  
12  
13  
14  
15  
16  
17  
18

---

10.10 Hoeveel voet/enkel pijn heeft u gehad in de afgelopen week bij het volledig uitstrekken van de voet/enkel?

Geen  
 Mild  
 Matig  
 Ernstig  
 Zeer ernstig

---

19  
20  
21  
22  
23  
24  
25  
26

---

10.11 Hoeveel voet/enkel pijn heeft u gehad in de afgelopen week bij het volledig naar u toe buigen/optrekken van de voet/enkel

Geen  
 Mild  
 Matig  
 Ernstig  
 Zeer ernstig

---

27  
28  
29  
30  
31  
32  
33  
34

---

10.12 Hoeveel voet/enkel pijn heeft u gehad in de afgelopen week bij het lopen op een vlakke ondergrond

Geen  
 Mild  
 Matig  
 Ernstig  
 Zeer ernstig

---

35  
36  
37  
38  
39  
40  
41  
42  
43

---

10.13 Hoeveel voet/enkel pijn heeft u gehad in de afgelopen week bij het trap op- en trap af lopen?

Geen  
 Mild  
 Matig  
 Ernstig  
 Zeer ernstig

---

44  
45  
46  
47  
48  
49  
50  
51

---

10.14 Hoeveel voet/enkel pijn heeft u gehad in de afgelopen week 's nachts in bed?

Geen  
 Mild  
 Matig  
 Ernstig  
 Zeer ernstig

---

52  
53  
54  
55  
56  
57  
58  
59  
60

---

10.15 Hoeveel voet/enkel pijn heeft u gehad in de afgelopen week bij het zitten of liggen?

Geen  
 Mild  
 Matig  
 Ernstig  
 Zeer ernstig

|    |       |                                                                                                                        |                                    |                                    |
|----|-------|------------------------------------------------------------------------------------------------------------------------|------------------------------------|------------------------------------|
| 1  |       |                                                                                                                        |                                    |                                    |
| 2  | 10.16 | Hoeveel voet/enkel pijn heeft u gehad in de afgelopen week bij het rechtop staan?                                      | <input type="radio"/> Geen         |                                    |
| 3  |       |                                                                                                                        | <input type="radio"/> Mild         |                                    |
| 4  |       |                                                                                                                        | <input type="radio"/> Matig        |                                    |
| 5  |       |                                                                                                                        | <input type="radio"/> Ernstig      |                                    |
| 6  |       |                                                                                                                        | <input type="radio"/> Zeer ernstig |                                    |
| 7  |       |                                                                                                                        |                                    |                                    |
| 8  |       |                                                                                                                        |                                    |                                    |
| 9  |       |                                                                                                                        |                                    |                                    |
| 10 | 10.17 | In welke mate werd u gehinderd bij het trap aflopen?                                                                   | <input type="radio"/> Niet         | <input type="radio"/> Mild         |
| 11 |       |                                                                                                                        | <input type="radio"/> Matig        | <input type="radio"/>              |
| 12 |       |                                                                                                                        | Ernstig                            | <input type="radio"/> Zeer ernstig |
| 13 |       |                                                                                                                        |                                    |                                    |
| 14 |       |                                                                                                                        |                                    |                                    |
| 15 | 10.18 | In welke mate werd u gehinderd bij het trap op lopen?                                                                  | <input type="radio"/> Niet         | <input type="radio"/> Mild         |
| 16 |       |                                                                                                                        | <input type="radio"/> Matig        | <input type="radio"/>              |
| 17 |       |                                                                                                                        | Ernstig                            | <input type="radio"/> Zeer ernstig |
| 18 |       |                                                                                                                        |                                    |                                    |
| 19 | 10.19 | In welke mate werd u gehinderd als u vanuit een zittende positie ging staan?                                           | <input type="radio"/> Niet         | <input type="radio"/> Mild         |
| 20 |       |                                                                                                                        | <input type="radio"/> Matig        | <input type="radio"/>              |
| 21 |       |                                                                                                                        | Ernstig                            | <input type="radio"/> Zeer ernstig |
| 22 |       |                                                                                                                        |                                    |                                    |
| 23 |       |                                                                                                                        |                                    |                                    |
| 24 | 10.20 | In welke mate werd u gehinderd bij het staan?                                                                          | <input type="radio"/> Niet         | <input type="radio"/> Mild         |
| 25 |       |                                                                                                                        | <input type="radio"/> Matig        | <input type="radio"/>              |
| 26 |       |                                                                                                                        | Ernstig                            | <input type="radio"/> Zeer ernstig |
| 27 |       |                                                                                                                        |                                    |                                    |
| 28 | 10.21 | In welke mate werd u gehinderd bij het naar de grond buigen/iets oprapen?                                              | <input type="radio"/> Niet         | <input type="radio"/> Mild         |
| 29 |       |                                                                                                                        | <input type="radio"/> Matig        | <input type="radio"/>              |
| 30 |       |                                                                                                                        | Ernstig                            | <input type="radio"/> Zeer ernstig |
| 31 |       |                                                                                                                        |                                    |                                    |
| 32 | 10.22 | In welke mate werd u gehinderd bij het lopen op een vlakke ondergrond?                                                 | <input type="radio"/> Niet         | <input type="radio"/> Mild         |
| 33 |       |                                                                                                                        | <input type="radio"/> Matig        | <input type="radio"/>              |
| 34 |       |                                                                                                                        | Ernstig                            | <input type="radio"/> Zeer ernstig |
| 35 |       |                                                                                                                        |                                    |                                    |
| 36 |       |                                                                                                                        |                                    |                                    |
| 37 | 10.23 | In welke mate werd u gehinderd bij het in- en uit de auto stappen?                                                     | <input type="radio"/> Niet         | <input type="radio"/> Mild         |
| 38 |       |                                                                                                                        | <input type="radio"/> Matig        | <input type="radio"/>              |
| 39 |       |                                                                                                                        | Ernstig                            | <input type="radio"/> Zeer ernstig |
| 40 |       |                                                                                                                        |                                    |                                    |
| 41 | 10.24 | In welke mate werd u gehinderd bij het boodschappen doen?                                                              | <input type="radio"/> Niet         | <input type="radio"/> Mild         |
| 42 |       |                                                                                                                        | <input type="radio"/> Matig        | <input type="radio"/>              |
| 43 |       |                                                                                                                        | Ernstig                            | <input type="radio"/> Zeer ernstig |
| 44 |       |                                                                                                                        |                                    |                                    |
| 45 | 10.25 | In welke mate werd u gehinderd bij sokken/panty's aantrekken?                                                          | <input type="radio"/> Niet         | <input type="radio"/> Mild         |
| 46 |       |                                                                                                                        | <input type="radio"/> Matig        | <input type="radio"/>              |
| 47 |       |                                                                                                                        | Ernstig                            | <input type="radio"/> Zeer ernstig |
| 48 |       |                                                                                                                        |                                    |                                    |
| 49 |       |                                                                                                                        |                                    |                                    |
| 50 | 10.26 | In welke mate werd u gehinderd bij het opstaan uit bed?                                                                | <input type="radio"/> Niet         | <input type="radio"/> Mild         |
| 51 |       |                                                                                                                        | <input type="radio"/> Matig        | <input type="radio"/>              |
| 52 |       |                                                                                                                        | Ernstig                            | <input type="radio"/> Zeer ernstig |
| 53 |       |                                                                                                                        |                                    |                                    |
| 54 | 10.27 | In welke mate werd u gehinderd bij het sokken uittrekken?                                                              | <input type="radio"/> Niet         | <input type="radio"/> Mild         |
| 55 |       |                                                                                                                        | <input type="radio"/> Matig        | <input type="radio"/>              |
| 56 |       |                                                                                                                        | Ernstig                            | <input type="radio"/> Zeer ernstig |
| 57 |       |                                                                                                                        |                                    |                                    |
| 58 |       |                                                                                                                        |                                    |                                    |
| 59 | 10.28 | In welke mate werd u gehinderd bij het in bed liggen (omdraaien, lange tijd uw voet/enkel in dezelfde positie houden)? | <input type="radio"/> Niet         | <input type="radio"/> Mild         |
| 60 |       |                                                                                                                        | <input type="radio"/> Matig        | <input type="radio"/>              |
|    |       |                                                                                                                        | Ernstig                            | <input type="radio"/> Zeer ernstig |

|    |       |                                                        |                                  |                                    |
|----|-------|--------------------------------------------------------|----------------------------------|------------------------------------|
| 1  |       |                                                        |                                  |                                    |
| 2  | 10.29 | In welke mate werd u gehinderd bij het in/uit bad      | <input type="radio"/> Niet       | <input type="radio"/> Mild         |
| 3  |       | stappen?                                               | <input type="radio"/> Matig      | <input type="radio"/>              |
| 4  |       |                                                        | Ernstig                          | <input type="radio"/> Zeer ernstig |
| 5  |       |                                                        |                                  |                                    |
| 6  | 10.30 | In welke mate werd u gehinderd bij zitten?             | <input type="radio"/> Niet       | <input type="radio"/> Mild         |
| 7  |       |                                                        | Ernstig                          | <input type="radio"/> Zeer ernstig |
| 8  |       |                                                        |                                  |                                    |
| 9  |       |                                                        |                                  |                                    |
| 10 | 10.31 | In welke mate werd u gehinderd bij het toilet op en af | <input type="radio"/> Niet       | <input type="radio"/> Mild         |
| 11 |       | gaan?                                                  | Ernstig                          | <input type="radio"/> Zeer ernstig |
| 12 |       |                                                        |                                  |                                    |
| 13 |       |                                                        |                                  |                                    |
| 14 |       |                                                        |                                  |                                    |
| 15 | 10.32 | In welke mate werd u gehinderd bij zwaar               | <input type="radio"/> Niet       | <input type="radio"/> Mild         |
| 16 |       | huishoudelijk werk (bijvoorbeeld zware dozen sjouwen,  | Ernstig                          | <input type="radio"/> Zeer ernstig |
| 17 |       | vloer schrobben)?                                      |                                  |                                    |
| 18 |       |                                                        |                                  |                                    |
| 19 | 10.33 | In welke mate werd u gehinderd bij licht huishoudelijk | <input type="radio"/> Niet       | <input type="radio"/> Mild         |
| 20 |       | werk (bijvoorbeeld koken, afstoffen)?                  | Ernstig                          | <input type="radio"/> Zeer ernstig |
| 21 |       |                                                        |                                  |                                    |
| 22 |       |                                                        |                                  |                                    |
| 23 |       |                                                        |                                  |                                    |
| 24 | 10.34 | In welke mate werd u gehinderd bij hurken?             | <input type="radio"/> Niet       | <input type="radio"/> Mild         |
| 25 |       |                                                        | Ernstig                          | <input type="radio"/> Zeer ernstig |
| 26 |       |                                                        |                                  |                                    |
| 27 |       |                                                        |                                  |                                    |
| 28 | 10.35 | In welke mate werd u gehinderd bij hardlopen?          | <input type="radio"/> Niet       | <input type="radio"/> Mild         |
| 29 |       |                                                        | Ernstig                          | <input type="radio"/> Zeer ernstig |
| 30 |       |                                                        |                                  |                                    |
| 31 |       |                                                        |                                  |                                    |
| 32 |       |                                                        |                                  |                                    |
| 33 | 10.36 | In welke mate werd u gehinderd bij springen?           | <input type="radio"/> Niet       | <input type="radio"/> Mild         |
| 34 |       |                                                        | Ernstig                          | <input type="radio"/> Zeer ernstig |
| 35 |       |                                                        |                                  |                                    |
| 36 |       |                                                        |                                  |                                    |
| 37 | 10.37 | In welke mate werd u gehinderd bij ronddraaien op uw   | <input type="radio"/> Niet       | <input type="radio"/> Mild         |
| 38 |       | aangedane voet/enkel?                                  | Ernstig                          | <input type="radio"/> Zeer ernstig |
| 39 |       |                                                        |                                  |                                    |
| 40 |       |                                                        |                                  |                                    |
| 41 | 10.38 | In welke mate werd u gehinderd bij knielen?            | <input type="radio"/> Niet       | <input type="radio"/> Mild         |
| 42 |       |                                                        | Ernstig                          | <input type="radio"/> Zeer ernstig |
| 43 |       |                                                        |                                  |                                    |
| 44 |       |                                                        |                                  |                                    |
| 45 |       |                                                        |                                  |                                    |
| 46 | 10.39 | Hoe vaak bent u zich bewust van uw voet/enkel          | <input type="radio"/> Nooit      | <input type="radio"/> Maandelijks  |
| 47 |       | probleem?                                              | Wekelijks                        | <input type="radio"/> Dagelijks    |
| 48 |       |                                                        |                                  | <input type="radio"/> Altijd       |
| 49 |       |                                                        |                                  |                                    |
| 50 | 10.40 | Heeft u uw leven veranderd om activiteiten te          | <input type="radio"/> Niet       |                                    |
| 51 |       | vermijden die schadelijk kunnen zijn voor uw           | <input type="radio"/> Enigszins  |                                    |
| 52 |       | voet/enkel?                                            | <input type="radio"/> Matig      |                                    |
| 53 |       |                                                        | <input type="radio"/> Behoorlijk |                                    |
| 54 |       |                                                        | <input type="radio"/> Volledig   |                                    |
| 55 |       |                                                        |                                  |                                    |
| 56 |       |                                                        |                                  |                                    |
| 57 |       |                                                        |                                  |                                    |
| 58 |       |                                                        |                                  |                                    |
| 59 |       |                                                        |                                  |                                    |
| 60 |       |                                                        |                                  |                                    |

1  
2  
3  
4  
5  
6  
7  
8  
9

10.41 In hoeverre kunt u op uw voet/enkel vertrouwen?

Volledig  
 Behoorlijk  
 Matig  
 Enigzins  
 Niet

10  
11  
12  
13  
14  
15  
16  
17  
18  
19  
20  
21  
22

10.42 In het algemeen, in welke mate ondervindt u hinder van uw voet/enkel

Geen  
 Mild  
 Matig  
 Ernstig  
 Zeer ernstig

23  
24  
25  
26

## Vragenlijst PRIMA studie 26 weken - PRODISQ - Gezondheid en werk

| Number | Question                                                                                                                                                                                                                                                                    | Answers                                                                                                                                                                                                                                                                                                                                                                                                                                                                                                                                                                |
|--------|-----------------------------------------------------------------------------------------------------------------------------------------------------------------------------------------------------------------------------------------------------------------------------|------------------------------------------------------------------------------------------------------------------------------------------------------------------------------------------------------------------------------------------------------------------------------------------------------------------------------------------------------------------------------------------------------------------------------------------------------------------------------------------------------------------------------------------------------------------------|
| 11.1   | Wat is uw leeftijd?                                                                                                                                                                                                                                                         | <input type="text"/> jaar                                                                                                                                                                                                                                                                                                                                                                                                                                                                                                                                              |
| 11.2   | Wat is uw geslacht?                                                                                                                                                                                                                                                         | <input type="radio"/> Man<br><input type="radio"/> Vrouw                                                                                                                                                                                                                                                                                                                                                                                                                                                                                                               |
| 11.3   | Wat is de hoogste opleiding die u heeft afgemaakt (Zoek uw hoogste opleiding en kruis het hokje daarvoor aan)?                                                                                                                                                              | <input type="checkbox"/> Ik heb geen school of opleiding afgemaakt<br><input type="checkbox"/> Lagere school of basisschool<br><input type="checkbox"/> Huishoudschool, vbo, lbo, lts, leao of lhno<br><input type="checkbox"/> Mavo, mulo, ivo of vmbo<br><input type="checkbox"/> Mbo, mts, meao, mhno, inas of intas<br><input type="checkbox"/> Havo, vwo, hbs, mms, atheneum of gymnasium<br><input type="checkbox"/> Hbo, hts, heao of hhno<br><input type="checkbox"/> Universiteit<br><input type="checkbox"/> Ik heb een andere opleiding afgemaakt, namelijk |
| 11.3.1 | <b><i>If 'Wat is de hoogste opleiding die u heeft afgemaakt (Zoek uw hoogste opleiding en kruis het hokje daarvoor aan)?' is equal to 'Ik heb een andere opleiding afgemaakt, namelijk' answer this question:</i></b><br>Wat is de hoogste opleiding die u heeft afgemaakt? | <input type="text"/>                                                                                                                                                                                                                                                                                                                                                                                                                                                                                                                                                   |

27  
28  
29  
30  
31  
32  
33  
34  
35  
36  
37  
38  
39  
40  
41  
42  
43  
44  
45  
46  
47  
48  
49  
50  
51  
52  
53  
54  
55  
56  
57  
58  
59  
60

- 1  
2  
3  
4  
5  
6  
7  
8  
9  
10  
11  
12  
13
- 11.4 Wat doet u in het dagelijks leven?
- Ik zit op school, ik studeer
- Ik werk in loondienst
- Ik ben zelfstandig ondernemer
- Ik ben huisvrouw, huisman
- Ik ben werkloos
- Ik ben arbeidsongeschikt
- Ik ben met pensioen of prepensioen
- Ik doe iets anders, namelijk

14  
15  
16  
17

11.4.1 ***If 'Wat doet u in het dagelijks leven?' is equal to 'Ik ben arbeidsongeschikt' answer this question:***

Wat doet u in het dagelijks leven?

18  
19  
20  
21  
22  
23

11.4.2 ***If 'Wat doet u in het dagelijks leven?' is equal to 'Ik doe iets anders, namelijk' answer this question:***

Wat doet u in het dagelijks leven?

24  
25  
26  
27  
28

11.5 Hebt u betaald werk?

Nee

Ja

29  
30  
31  
32

11.5.1 ***If 'Hebt u betaald werk?' is equal to 'Ja' answer this question:***

Wat is uw beroep?

33  
34  
35  
36  
37

11.5.2 ***If 'Hebt u betaald werk?' is equal to 'Ja' answer this question:***

Hoeveel uur per week werkt u (Tel alleen de uren waarvoor u betaald wordt)?

uren

38  
39  
40  
41  
42

11.5.3 ***If 'Hebt u betaald werk?' is equal to 'Ja' answer this question:***

Hoeveel dagen in de week werkt u?

Dagen

43  
44  
45  
46  
47

11.5.4 ***If 'Hebt u betaald werk?' is equal to 'Ja' answer this question:***

Bent u in de afgelopen 4 weken afwezig geweest van uw werk omdat u ziek was?

Nee

Ja

48  
49  
50  
51  
52  
53  
54

11.5.4.1 ***If 'Bent u in de afgelopen 4 weken afwezig geweest van uw werk omdat u ziek was?' is equal to 'Ja' answer this question:***

Bent u in de afgelopen 4 weken afwezig geweest van uw werk omdat u ziek was (Tel alleen de werkdagen in de afgelopen 4 weken)?

dagen afwezig geweest

55  
56  
57  
58  
59  
60

11.5.4.2 ***If 'Bent u in de afgelopen 4 weken afwezig geweest van uw werk omdat u ziek was?' is equal to 'Ja' answer this question:***

Was u langer dan de gehele periode van 4 weken afwezig van uw werk doordat u ziek was?

Nee

Ja

|            |                                                                                                                                                                                                                                                                                                                                                                                                                 |                                                                             |                                            |
|------------|-----------------------------------------------------------------------------------------------------------------------------------------------------------------------------------------------------------------------------------------------------------------------------------------------------------------------------------------------------------------------------------------------------------------|-----------------------------------------------------------------------------|--------------------------------------------|
| 11.5.4.2.1 | <b>If 'Was u langer dan de gehele periode van 4 weken afwezig van uw werk doordat u ziek was?' is equal to 'Ja' answer this question:</b><br>Wanneer heeft u zich ziek gemeld?                                                                                                                                                                                                                                  | <input type="text"/> <input type="text"/> <input type="text"/> (dd-mm-yyyy) |                                            |
| 11.5.5     | <b>If 'Hebt u betaald werk?' is equal to 'Ja' answer this question:</b><br>Waren er in de afgelopen 4 weken, dagen waarop u wel gewerkt heeft, maar tijdens uw werk last had van lichamelijke of psychische problemen?                                                                                                                                                                                          | <input type="radio"/> Ja<br><input type="radio"/> Nee                       |                                            |
| 11.5.5.1   | <b>If 'Waren er in de afgelopen 4 weken, dagen waarop u wel gewerkt heeft, maar tijdens uw werk last had van lichamelijke of psychische problemen?' is equal to 'Ja' answer this question:</b><br>Op hoeveel werkdagen had u tijdens uw werk last van uw lichamelijke of psychische problemen?                                                                                                                  | <input type="text"/> werkdagen                                              |                                            |
| 11.5.5.2   | <b>If 'Waren er in de afgelopen 4 weken, dagen waarop u wel gewerkt heeft, maar tijdens uw werk last had van lichamelijke of psychische problemen?' is equal to 'Ja' answer this question:</b><br>Op de dagen dat u last had, kon u misschien niet zoveel werk doen als normaal. Hoeveel werk kon u op deze dagen gemiddeld doen?                                                                               | Ik kon op deze dagen niks doen (0.00)                                       | Ik kon net zoveel doen als normaal (10.00) |
| 11.6       | Waren er dagen waarop u minder onbetaald werk kon doen door uw lichamelijke of psychische problemen?                                                                                                                                                                                                                                                                                                            | <input type="radio"/> Nee<br><input type="radio"/> Ja                       |                                            |
| 11.6.1     | <b>If 'Waren er dagen waarop u minder onbetaald werk kon doen door uw lichamelijke of psychische problemen?' is equal to 'Ja' answer this question:</b><br>Op hoeveel dagen was dit zo?                                                                                                                                                                                                                         | <input type="text"/> Dagen                                                  |                                            |
| 11.6.2     | <b>If 'Waren er dagen waarop u minder onbetaald werk kon doen door uw lichamelijke of psychische problemen?' is equal to 'Ja' answer this question:</b><br>Stel dat iemand, bijvoorbeeld uw partner, familielid of een bekende, u op deze dagen had geholpen. En al het onbetaalde werk wat u niet kon doen, voor u had gedaan. Hoeveel uur was die persoon hier op deze dagen dan gemiddeld mee bezig geweest? | <input type="text"/> uur op deze dagen                                      |                                            |

## Vragenlijst PRIMA studie 26 weken - PRODISQ - Zorggebruik

| Number | Question | Answers |
|--------|----------|---------|
|--------|----------|---------|

Wij willen graag weten met welke dokters u in de afgelopen 3 maanden een afspraak had. Het gaat om afspraken voor uzelf. Ook andere zorgverleners tellen mee. Bijvoorbeeld de fysiotherapeut.

1  
2  
3  
4  
5

12.1 Bent u in de afgelopen 3 maanden naar uw huisarts geweest?  Nee  
 Ja

6  
7  
8  
9  
10  
11

12.1.1 ***If 'Bent u in de afgelopen 3 maanden naar uw huisarts geweest?' is equal to 'Ja' answer this question:***  afspraken  
Hoeveel afspraken had u?

12  
13  
14  
15

12.2 Bent u in de afgelopen 3 maanden in contact geweest met een maatschappelijk werker?  Nee  
 Ja

16  
17  
18  
19  
20  
21

12.2.1 ***If 'Bent u in de afgelopen 3 maanden in contact geweest met een maatschappelijk werker?' is equal to 'Ja' answer this question:***  afspraken  
Hoeveel afspraken had u?

22  
23  
24  
25

12.3 Bent u in de afgelopen 3 maanden naar een fysiotherapeut geweest? Of een caesartherapeut, therapeut mensendieck of een manueel therapeut?  Nee  
 Ja

26  
27  
28  
29  
30  
31

12.3.1 ***If 'Bent u in de afgelopen 3 maanden naar een fysiotherapeut geweest? Of een caesartherapeut, therapeut mensendieck of een manueel therapeut?' is equal to 'Ja' answer this question:***  afspraken  
Hoeveel afspraken had u?

32  
33  
34  
35

12.4 Bent u in de afgelopen 3 maanden naar een ergotherapeut geweest?  Nee  
 Ja

36  
37  
38  
39  
40  
41

12.4.1 ***If 'Bent u in de afgelopen 3 maanden naar een ergotherapeut geweest?' is equal to 'Ja' answer this question:***  afspraken  
Hoeveel afspraken had u?

42  
43  
44  
45

12.5 Bent u in de afgelopen 3 maanden naar een logopedist geweest?  Nee  
 Ja

46  
47  
48  
49  
50  
51

12.5.1 ***If 'Bent u in de afgelopen 3 maanden naar een logopedist geweest?' is equal to 'Ja' answer this question:***  afspraken  
Hoeveel afspraken had u?

52  
53  
54  
55

12.6 Bent u in de afgelopen 3 maanden naar een diëtist geweest?  Nee  
 Ja

56  
57  
58  
59  
60

12.6.1 ***If 'Bent u in de afgelopen 3 maanden naar een diëtist geweest?' is equal to 'Ja' answer this question:***  afspraken  
Hoeveel afspraken had u?



1  
2  
3  
4  
5  
6  
7  
8  
9  
10  
11  
12  
13  
14  
15  
16  
17  
18  
19  
20  
21  
22  
23  
24  
25  
26  
27  
28  
29  
30  
31  
32  
33  
34  
35  
36  
37  
38  
39  
40  
41  
42  
43  
44  
45  
46  
47  
48  
49  
50  
51  
52  
53  
54  
55  
56  
57  
58  
59  
60

|           |                                                                                                                                                                                                                                                                           |                                                                                                                                                                                                                                                                                                     |
|-----------|---------------------------------------------------------------------------------------------------------------------------------------------------------------------------------------------------------------------------------------------------------------------------|-----------------------------------------------------------------------------------------------------------------------------------------------------------------------------------------------------------------------------------------------------------------------------------------------------|
| 12.7      | Bent u in de afgelopen 3 maanden naar een homeopaat geweest? Of een acupuncturist?                                                                                                                                                                                        | <input type="radio"/> Nee<br><input type="radio"/> Ja                                                                                                                                                                                                                                               |
| 12.7.1    | <b>If 'Bent u in de afgelopen 3 maanden naar een homeopaat geweest? Of een acupuncturist?' is equal to 'Ja' answer this question:</b><br>Hoeveel afspraken had u?                                                                                                         | <input type="text"/> afspraken                                                                                                                                                                                                                                                                      |
| 12.8      | Bent u in de afgelopen 3 maanden naar een psycholoog geweest? Of een psychotherapeut of psychiater?                                                                                                                                                                       | <input type="radio"/> Nee<br><input type="radio"/> Ja                                                                                                                                                                                                                                               |
| 12.8.1    | <b>If 'Bent u in de afgelopen 3 maanden naar een psycholoog geweest? Of een psychotherapeut of psychiater?' is equal to 'Ja' answer this question:</b><br>Hoeveel afspraken had u?                                                                                        | <input type="text"/> afspraken                                                                                                                                                                                                                                                                      |
| 12.9      | Heeft u in de afgelopen 3 maanden afspraken gehad met de bedrijfsarts?                                                                                                                                                                                                    | <input type="radio"/> Nee<br><input type="radio"/> Ja                                                                                                                                                                                                                                               |
| 12.9.1    | <b>If 'Heeft u in de afgelopen 3 maanden afspraken gehad met de bedrijfsarts?' is equal to 'Ja' answer this question:</b><br>Hoeveel afspraken had u?                                                                                                                     | <input type="text"/> afspraken                                                                                                                                                                                                                                                                      |
| 12.10     | Heeft u in de afgelopen 3 maanden hulp van de thuiszorg gehad?                                                                                                                                                                                                            | <input type="radio"/> Ja<br><input type="radio"/> Nee                                                                                                                                                                                                                                               |
| 12.10.1   | <b>If 'Heeft u in de afgelopen 3 maanden hulp van de thuiszorg gehad?' is equal to 'Ja' answer this question:</b><br>Wat voor hulp van de thuiszorg heeft u gehad in de afgelopen 3 maanden?                                                                              | <input type="checkbox"/> Huishoudelijke hulp; voorbeeld: stofzuigen, bed opmaken, boodschappen doen<br><input type="checkbox"/> Verzorging van uzelf; voorbeeld: hulp bij douchen of aankleden<br><input type="checkbox"/> Verpleging; voorbeeld: verband omdoen, medicijnen geven, bloeddruk meten |
| 12.10.1.1 | <b>If 'Wat voor hulp van de thuiszorg heeft u gehad in de afgelopen 3 maanden?' is equal to 'Huishoudelijke hulp; voorbeeld: stofzuigen, bed opmaken, boodschappen doen' answer this question:</b><br>Hoeveel weken heeft u deze thuiszorg gehad?<br>Huishoudelijke hulp: | <input type="text"/> weken in de afgelopen 3 maanden                                                                                                                                                                                                                                                |
| 12.10.1.2 | <b>If 'Wat voor hulp van de thuiszorg heeft u gehad in de afgelopen 3 maanden?' is equal to 'Verzorging van uzelf; voorbeeld: hulp bij douchen of aankleden' answer this question:</b><br>Hoeveel weken heeft u deze thuiszorg gehad?<br>Verzorging van uzelf:            | <input type="text"/> weken in de afgelopen 3 maanden                                                                                                                                                                                                                                                |

1  
2  
3  
4  
5  
6  
7  
8

12.10.1.3 **If 'Wat voor hulp van de thuiszorg heeft u gehad in de afgelopen 3 maanden?' is equal to 'Verpleging; voorbeeld: verband omdoen, medicijnen geven, bloeddruk meten' answer this question:**  
Hoeveel weken heeft u deze thuiszorg gehad?  
Verpleging:  weken in de afgelopen 3 maanden

9  
10  
11  
12  
13  
14  
15  
16  
17

12.10.1.4 **If 'Wat voor hulp van de thuiszorg heeft u gehad in de afgelopen 3 maanden?' is equal to 'Huishoudelijke hulp; voorbeeld: stofzuigen, bed opmaken, boodschappen doen' answer this question:**  
Hoeveel uur thuiszorg kreeg u in deze weken gemiddeld? Huishoudelijke hulp: gemiddeld  uur in de week

18  
19  
20  
21  
22  
23  
24

12.10.1.5 **If 'Wat voor hulp van de thuiszorg heeft u gehad in de afgelopen 3 maanden?' is equal to 'Verzorging van uzelf; voorbeeld: hulp bij douchen of aankleden' answer this question:**  
Hoeveel uur thuiszorg kreeg u in deze weken gemiddeld? Verzorging van uzelf: gemiddeld  uur in de week

25  
26  
27  
28  
29  
30  
31  
32

12.10.1.6 **If 'Wat voor hulp van de thuiszorg heeft u gehad in de afgelopen 3 maanden?' is equal to 'Verpleging; voorbeeld: verband omdoen, medicijnen geven, bloeddruk meten' answer this question:**  
Hoeveel uur thuiszorg kreeg u in deze weken gemiddeld? Verpleging: gemiddeld  uur in de week

33  
34  
35  
36

12.11 Heeft u in de afgelopen 3 maanden medicijnen gebruikt?  Ja  Nee

37  
38  
39  
40  
41  
42

12.11.1 **If 'Heeft u in de afgelopen 3 maanden medicijnen gebruikt?' is equal to 'Ja' answer this question:**  
Welke medicijnen heeft u in de afgelopen 3 maanden gebruikt?

43  
44  
45  
46  
47

12.12 Bent u in de afgelopen 3 maanden op de spoedeisende eerste hulp van een ziekenhuis geweest? (Een andere naam voor spoedeisende eerste hulp is EHBO)  Nee  Ja

48  
49  
50  
51  
52  
53  
54  
55

12.12.1 **If 'Bent u in de afgelopen 3 maanden op de spoedeisende eerste hulp van een ziekenhuis geweest? (Een andere naam voor spoedeisende eerste hulp is EHBO)' is equal to 'Ja' answer this question:**  
Hoe vaak bent u geweest?  keer

56  
57  
58  
59  
60

12.13 Bent u in de afgelopen 3 maanden met een ambulance naar het ziekenhuis gebracht? (Een andere naam voor ambulance is ziekenauto)  Nee  Ja

1  
2  
3  
4  
5  
6  
7

12.13.1 ***If 'Bent u in de afgelopen 3 maanden met een ambulance naar het ziekenhuis gebracht? (Een andere naam voor ambulance is ziekenauto)' is equal to 'Ja' answer this question:***  keer  
***Hoe vaak bent u naar het ziekenhuis gebracht?***

8  
9  
10  
11  
12

12.14 Had u in de afgelopen 3 maanden een afspraak bij de polikliniek van het ziekenhuis? (Het gaat om afspraken voor uzelf met een dokter. Bijvoorbeeld met de cardioloog, reumatoloog of neuroloog)  Ja  Nee

13  
14  
15  
16  
17  
18  
19  
20  
21

12.14.1 ***If 'Had u in de afgelopen 3 maanden een afspraak bij de polikliniek van het ziekenhuis? (Het gaat om afspraken voor uzelf met een dokter. Bijvoorbeeld met de cardioloog, reumatoloog of neuroloog)' is equal to 'Ja' answer this question:***   
***Bij welke soorten dokters bent u in de afgelopen 3 maanden in het ziekenhuis geweest? En hoe vaak?***

22  
23  
24  
25  
26  
27

12.15 Bent u in de afgelopen 3 maanden overdag in het ziekenhuis geweest voor een behandeling? (U bleef dus niet slapen. U kwam bijvoorbeeld voor een bloedtransfusie, nierdialyse of chemokuur)  Ja  Nee

28  
29  
30  
31  
32  
33  
34

12.15.1 ***If 'Bent u in de afgelopen 3 maanden overdag in het ziekenhuis geweest voor een behandeling? (U bleef dus niet slapen. U kwam bijvoorbeeld voor een bloedtransfusie, nierdialyse of chemokuur)' is equal to 'Ja' answer this question:***   
***Voor welke soort behandeling was dit?***

35  
36  
37  
38  
39  
40  
41  
42  
43

12.15.2 ***If 'Bent u in de afgelopen 3 maanden overdag in het ziekenhuis geweest voor een behandeling? (U bleef dus niet slapen. U kwam bijvoorbeeld voor een bloedtransfusie, nierdialyse of chemokuur)' is equal to 'Ja' answer this question:***   
***Hoeveel keer moest u in de afgelopen 3 maanden voor deze behandelingen naar het ziekenhuis?***

44  
45  
46  
47  
48  
49  
50

12.16 Bent u in de afgelopen 3 maanden ergens anders geweest voor een behandeling overdag? (U bleef dus niet slapen. U ging bijvoorbeeld naar de dagopvang van een woon-/zorgcentrum of een psychiatrische instelling. Of naar de dagbehandeling van een revalidatiecentrum)  Ja  Nee

51  
52  
53  
54  
55  
56  
57  
58  
59  
60

12.16.1 ***If 'Bent u in de afgelopen 3 maanden ergens anders geweest voor een behandeling overdag? (U bleef dus niet slapen. U ging bijvoorbeeld naar de dagopvang van een woon-/zorgcentrum of een psychiatrische instelling. Of naar de dagbehandeling van een revalidatiecentrum)' is equal to 'Ja' answer this question:***  Woon-/zorgcentrum  Revalidatiecentrum  Psychiatrische instelling  Een andere instelling, namelijk  
***Wat voor instelling was dit?***

- 1  
2  
3  
4  
5  
6  
7
- 12.16.1.1 **If 'Wat voor instelling was dit?' is equal to 'Een andere instelling, namelijk' answer this question:**  
Wat voor instelling was dit?
- 8  
9  
10  
11  
12
- 12.16.1.2 **If 'Wat voor instelling was dit?' is equal to 'Woon-/zorgcentrum' answer this question:**  
Hoe vaak moest u hier in de afgelopen 3 maanden naartoe? Naar het woon-/zorgcentrum:
- 13  
14  
15  
16  
17
- 12.16.1.3 **If 'Wat voor instelling was dit?' is equal to 'Revalidatiecentrum' answer this question:**  
Hoe vaak moest u hier in de afgelopen 3 maanden naartoe? Naar het revalidatiecentrum:
- 18  
19  
20  
21  
22  
23
- 12.16.1.4 **If 'Wat voor instelling was dit?' is equal to 'Psychiatrische instelling' answer this question:**  
Hoe vaak moest u hier in de afgelopen 3 maanden naartoe? Naar de psychiatrische instelling:
- 24  
25  
26  
27  
28
- 12.16.1.5 **If 'Wat voor instelling was dit?' is equal to 'Een andere instelling, namelijk' answer this question:**  
Hoe vaak moest u hier in de afgelopen 3 maanden naartoe? Naar de andere instelling:
- 29  
30  
31  
32  
33
- 12.17 Heeft u in de afgelopen 3 maanden weleens in het ziekenhuis gelegen? (U moest dus blijven slapen. Bijvoorbeeld omdat u geopereerd was en niet meteen naar huis kon)
- 34  
35  
36  
37  
38  
39  
40  
41  
42
- 12.17.1 **If 'Heeft u in de afgelopen 3 maanden weleens in het ziekenhuis gelegen? (U moest dus blijven slapen. Bijvoorbeeld omdat u geopereerd was en niet meteen naar huis kon)' is equal to 'Ja' answer this question:**  
Hoe vaak heeft u in de afgelopen 3 maanden in het ziekenhuis gelegen?
- 43  
44  
45  
46  
47  
48  
49
- 12.17.2 **If 'Heeft u in de afgelopen 3 maanden weleens in het ziekenhuis gelegen? (U moest dus blijven slapen. Bijvoorbeeld omdat u geopereerd was en niet meteen naar huis kon)' is equal to 'Ja' answer this question:**  
Hoe lang heeft u in het ziekenhuis gelegen?
- 50  
51  
52  
53  
54  
55  
56  
57  
58  
59  
60

- 1  
2  
3  
4  
5  
6  
7  
8
- 12.18.1 **If 'Moest u in de afgelopen 3 maanden ergens anders blijven slapen voor uw gezondheid? (Bijvoorbeeld in een woon-/zorgcentrum, psychiatrische instelling of revalidatiecentrum)' is equal to 'Ja' answer this question:**  
Wat voor instelling was dit?
- Woon-/zorgcentrum  
 Revalidatiecentrum  
 Psychiatrische instelling  
 Een andere instelling, namelijk
- 
- 9  
10  
11  
12  
13  
14
- 12.18.1.1 **If 'Wat voor instelling was dit?' is equal to 'Een andere instelling, namelijk' answer this question:**  
Een andere instelling, namelijk
- 
- 
- 15  
16  
17  
18  
19
- 12.18.1.2 **If 'Wat voor instelling was dit?' is equal to 'Woon-/zorgcentrum' answer this question:**  
Hoe lang bent u in deze instelling geweest? In het woon-/zorgcentrum:
- dagen in de afgelopen 3 maanden
- 
- 20  
21  
22  
23  
24  
25
- 12.18.1.3 **If 'Wat voor instelling was dit?' is equal to 'Revalidatiecentrum' answer this question:**  
Hoe lang bent u in deze instelling geweest? In het revalidatiecentrum:
- dagen in de afgelopen 3 maanden
- 
- 26  
27  
28  
29  
30
- 12.18.1.4 **If 'Wat voor instelling was dit?' is equal to 'Psychiatrische instelling' answer this question:**  
Hoe lang bent u in deze instelling geweest? In de psychiatrische instelling:
- dagen in de afgelopen 3 maanden
- 
- 31  
32  
33  
34  
35
- 12.18.1.5 **If 'Wat voor instelling was dit?' is equal to 'Een andere instelling, namelijk' answer this question:**  
Hoe lang bent u in deze instelling geweest? In de andere instelling:
- dagen in de afgelopen 3 maanden
- 
- 36  
37  
38  
39  
40
- 12.19 Heeft u in de afgelopen 3 maanden hulp gekregen van een familielid of een bekende vanwege uw lichamelijke of psychische problemen?
- Ja  
 Nee
- 
- 41  
42  
43  
44  
45  
46  
47  
48  
49  
50  
51  
52  
53  
54  
55  
56  
57  
58  
59  
60
- 12.19.1 **If 'Heeft u in de afgelopen 3 maanden hulp gekregen van een familielid of een bekende vanwege uw lichamelijke of psychische problemen?' is equal to 'Ja' answer this question:**  
Wat voor hulp van familieleden of bekenden heeft u gehad in de afgelopen 3 maanden?
- Huishoudelijke hulp - voorbeeld: stofzuigen, bed opmaken, boodschappen doen, klaarmaken van eten en drinken, verzorgen van kinderen  
 Verzorging van uzelf - voorbeeld: hulp bij douchen of aankleden, hulp bij het eten en drinken of het geven van medicijnen  
 Praktische hulp - voorbeeld: ondersteuning bij wandelen, het maken van uitstapjes of bezoeken aan bekenden, bezoeken aan de huisarts of het ziekenhuis, het regelen van hulp of het regelen van financiële zaken

- 1  
2  
3  
4  
5  
6  
7  
8  
9  
10
- 12.19.1.1 **If 'Wat voor hulp van familieleden of bekenden heeft u gehad in de afgelopen 3 maanden?' is equal to 'Huishoudelijke hulp - voorbeeld: stofzuigen, bed opmaken, boodschappen doen, klaarmaken van eten en drinken, verzorgen van kinderen' answer this question:**  
Hoeveel weken heeft u deze hulp gehad?  
Huishoudelijke hulp:
- weken in de afgelopen 3 maanden
- 
- 11  
12  
13  
14  
15  
16  
17  
18  
19
- 12.19.1.2 **If 'Wat voor hulp van familieleden of bekenden heeft u gehad in de afgelopen 3 maanden?' is equal to 'Verzorging van uzelf - voorbeeld: hulp bij douchen of aankleden, hulp bij het eten en drinken of het geven van medicijnen' answer this question:**  
Hoeveel weken heeft u deze hulp gehad? Verzorging van uzelf:
- weken in de afgelopen 3 maanden
- 
- 20  
21  
22  
23  
24  
25  
26  
27  
28  
29  
30  
31
- 12.19.1.3 **If 'Wat voor hulp van familieleden of bekenden heeft u gehad in de afgelopen 3 maanden?' is equal to 'Praktische hulp - voorbeeld: ondersteuning bij wandelen, het maken van uitstapjes of bezoeken aan bekenden, bezoeken aan de huisarts of het ziekenhuis, het regelen van hulp of het regelen van financiële zaken' answer this question:**  
Hoeveel uur hulp kreeg u in deze weken gemiddeld?  
Praktische hulp:
- weken in de afgelopen 3 maanden
- 
- 32  
33  
34  
35  
36  
37  
38  
39  
40  
41
- 12.19.1.4 **If 'Wat voor hulp van familieleden of bekenden heeft u gehad in de afgelopen 3 maanden?' is equal to 'Huishoudelijke hulp - voorbeeld: stofzuigen, bed opmaken, boodschappen doen, klaarmaken van eten en drinken, verzorgen van kinderen' answer this question:**  
Hoeveel uur hulp kreeg u in deze weken gemiddeld?  
Huishoudelijke hulp: gemiddeld
- uur in de week
- 
- 42  
43  
44  
45  
46  
47  
48  
49
- 12.19.1.5 **If 'Wat voor hulp van familieleden of bekenden heeft u gehad in de afgelopen 3 maanden?' is equal to 'Verzorging van uzelf - voorbeeld: hulp bij douchen of aankleden, hulp bij het eten en drinken of het geven van medicijnen' answer this question:**  
Hoeveel uur hulp kreeg u in deze weken gemiddeld?  
Verzorging van uzelf: gemiddeld
- uur in de week
- 
- 50  
51  
52  
53  
54  
55  
56  
57  
58  
59  
60
- 12.19.1.6 **If 'Wat voor hulp van familieleden of bekenden heeft u gehad in de afgelopen 3 maanden?' is equal to 'Praktische hulp - voorbeeld: ondersteuning bij wandelen, het maken van uitstapjes of bezoeken aan bekenden, bezoeken aan de huisarts of het ziekenhuis, het regelen van hulp of het regelen van financiële zaken' answer this question:**  
Hoeveel uur hulp kreeg u in deze weken gemiddeld?  
Praktische hulp: gemiddeld
- uur in de week

## Vragenlijst PRIMA studie 26 weken - Dank

| Number | Question                                                                                                                                      | Answers              |
|--------|-----------------------------------------------------------------------------------------------------------------------------------------------|----------------------|
| 13.1   | Hartelijk dank voor de tijd die u heeft genomen om de vragenlijsten in te vullen. Indien u nog opmerkingen heeft kunt u deze hierin plaatsen. | <input type="text"/> |

## Survey 'Vragenlijst PRIMA studie 39 weken'

### Vragenlijst PRIMA studie 39 weken - PRODISQ - Gezondheid en werk

| Number | Question                                                                                                                                                                                                                                                                    | Answers                                                                                                                                                                                                                                                                                                                                                                                                                                                                                                                                                                |
|--------|-----------------------------------------------------------------------------------------------------------------------------------------------------------------------------------------------------------------------------------------------------------------------------|------------------------------------------------------------------------------------------------------------------------------------------------------------------------------------------------------------------------------------------------------------------------------------------------------------------------------------------------------------------------------------------------------------------------------------------------------------------------------------------------------------------------------------------------------------------------|
| 1.1    | Wat is uw leeftijd?                                                                                                                                                                                                                                                         | <input type="text"/> jaar                                                                                                                                                                                                                                                                                                                                                                                                                                                                                                                                              |
| 1.2    | Wat is uw geslacht?                                                                                                                                                                                                                                                         | <input type="radio"/> Man<br><input type="radio"/> Vrouw                                                                                                                                                                                                                                                                                                                                                                                                                                                                                                               |
| 1.3    | Wat is de hoogste opleiding die u heeft afgemaakt (Zoek uw hoogste opleiding en kruis het hokje daarvoor aan)?                                                                                                                                                              | <input type="checkbox"/> Ik heb geen school of opleiding afgemaakt<br><input type="checkbox"/> Lagere school of basisschool<br><input type="checkbox"/> Huishoudschool, vbo, lbo, lts, leao of lhno<br><input type="checkbox"/> Mavo, mulo, ivo of vmbo<br><input type="checkbox"/> Mbo, mts, meao, mhno, inas of intas<br><input type="checkbox"/> Havo, vwo, hbs, mms, atheneum of gymnasium<br><input type="checkbox"/> Hbo, hts, heao of hhno<br><input type="checkbox"/> Universiteit<br><input type="checkbox"/> Ik heb een andere opleiding afgemaakt, namelijk |
| 1.3.1  | <b><i>If 'Wat is de hoogste opleiding die u heeft afgemaakt (Zoek uw hoogste opleiding en kruis het hokje daarvoor aan)?' is equal to 'Ik heb een andere opleiding afgemaakt, namelijk' answer this question:</i></b><br>Wat is de hoogste opleiding die u heeft afgemaakt? | <input type="text"/>                                                                                                                                                                                                                                                                                                                                                                                                                                                                                                                                                   |

- 1  
2  
3  
4  
5  
6  
7  
8  
9  
10  
11  
12  
13
- 1.4 Wat doet u in het dagelijks leven?
- Ik zit op school, ik studeer
- Ik werk in loondienst
- Ik ben zelfstandig ondernemer
- Ik ben huisvrouw, huisman
- Ik ben werkloos
- Ik ben arbeidsongeschikt
- Ik ben met pensioen of prepensioen
- Ik doe iets anders, namelijk

14  
15  
16  
17

1.4.1 ***If 'Wat doet u in het dagelijks leven?' is equal to 'Ik ben arbeidsongeschikt' answer this question:***

Wat doet u in het dagelijks leven?

18  
19  
20  
21  
22  
23

1.4.2 ***If 'Wat doet u in het dagelijks leven?' is equal to 'Ik doe iets anders, namelijk' answer this question:***

Wat doet u in het dagelijks leven?

24  
25  
26  
27  
28

1.5 Hebt u betaald werk?

Nee

Ja

29  
30  
31  
32

1.5.1 ***If 'Hebt u betaald werk?' is equal to 'Ja' answer this question:***

Wat is uw beroep?

33  
34  
35  
36  
37

1.5.2 ***If 'Hebt u betaald werk?' is equal to 'Ja' answer this question:***

Hoeveel uur per week werkt u (Tel alleen de uren waarvoor u betaald wordt)?

uren

38  
39  
40  
41  
42

1.5.3 ***If 'Hebt u betaald werk?' is equal to 'Ja' answer this question:***

Hoeveel dagen in de week werkt u?

Dagen

43  
44  
45  
46  
47

1.5.4 ***If 'Hebt u betaald werk?' is equal to 'Ja' answer this question:***

Bent u in de afgelopen 4 weken afwezig geweest van uw werk omdat u ziek was?

Nee

Ja

48  
49  
50  
51  
52  
53  
54

1.5.4.1 ***If 'Bent u in de afgelopen 4 weken afwezig geweest van uw werk omdat u ziek was?' is equal to 'Ja' answer this question:***

Bent u in de afgelopen 4 weken afwezig geweest van uw werk omdat u ziek was (Tel alleen de werkdagen in de afgelopen 4 weken)?

dagen afwezig geweest

55  
56  
57  
58  
59  
60

1.5.4.2 ***If 'Bent u in de afgelopen 4 weken afwezig geweest van uw werk omdat u ziek was?' is equal to 'Ja' answer this question:***

Was u langer dan de gehele periode van 4 weken afwezig van uw werk doordat u ziek was?

Nee

Ja



1  
2  
3  
4  
5  
6  
7  
8  
9  
10  
11  
12  
13  
14  
15  
16  
17  
18  
19  
20  
21  
22  
23  
24  
25  
26  
27  
28  
29  
30  
31  
32  
33  
34  
35  
36  
37  
38  
39  
40  
41  
42  
43  
44  
45  
46  
47  
48  
49  
50  
51  
52  
53  
54  
55  
56  
57  
58  
59  
60

|           |                                                                                                                                                                                                                                                                                                                                                                                                                 |                                                                                     |
|-----------|-----------------------------------------------------------------------------------------------------------------------------------------------------------------------------------------------------------------------------------------------------------------------------------------------------------------------------------------------------------------------------------------------------------------|-------------------------------------------------------------------------------------|
| 1.5.4.2.1 | <b>If 'Was u langer dan de gehele periode van 4 weken afwezig van uw werk doordat u ziek was?' is equal to 'Ja' answer this question:</b><br>Wanneer heeft u zich ziek gemeld?                                                                                                                                                                                                                                  | <input type="text"/> <input type="text"/> <input type="text"/> (dd-mm-yyyy)         |
| 1.5.5     | <b>If 'Hebt u betaald werk?' is equal to 'Ja' answer this question:</b><br>Waren er in de afgelopen 4 weken, dagen waarop u wel gewerkt heeft, maar tijdens uw werk last had van lichamelijke of psychische problemen?                                                                                                                                                                                          | <input type="radio"/> Ja<br><input type="radio"/> Nee                               |
| 1.5.5.1   | <b>If 'Waren er in de afgelopen 4 weken, dagen waarop u wel gewerkt heeft, maar tijdens uw werk last had van lichamelijke of psychische problemen?' is equal to 'Ja' answer this question:</b><br>Op hoeveel werkdagen had u tijdens uw werk last van uw lichamelijke of psychische problemen?                                                                                                                  | <input type="text"/> werkdagen                                                      |
| 1.5.5.2   | <b>If 'Waren er in de afgelopen 4 weken, dagen waarop u wel gewerkt heeft, maar tijdens uw werk last had van lichamelijke of psychische problemen?' is equal to 'Ja' answer this question:</b><br>Op de dagen dat u last had, kon u misschien niet zoveel werk doen als normaal. Hoeveel werk kon u op deze dagen gemiddeld doen?                                                                               | Ik kon op deze dagen niks doen (0.00)<br>Ik kon net zoveel doen als normaal (10.00) |
| 1.6       | Waren er dagen waarop u minder onbetaald werk kon doen door uw lichamelijke of psychische problemen?                                                                                                                                                                                                                                                                                                            | <input type="radio"/> Nee<br><input type="radio"/> Ja                               |
| 1.6.1     | <b>If 'Waren er dagen waarop u minder onbetaald werk kon doen door uw lichamelijke of psychische problemen?' is equal to 'Ja' answer this question:</b><br>Op hoeveel dagen was dit zo?                                                                                                                                                                                                                         | <input type="text"/> Dagen                                                          |
| 1.6.2     | <b>If 'Waren er dagen waarop u minder onbetaald werk kon doen door uw lichamelijke of psychische problemen?' is equal to 'Ja' answer this question:</b><br>Stel dat iemand, bijvoorbeeld uw partner, familielid of een bekende, u op deze dagen had geholpen. En al het onbetaalde werk wat u niet kon doen, voor u had gedaan. Hoeveel uur was die persoon hier op deze dagen dan gemiddeld mee bezig geweest? | <input type="text"/> uur op deze dagen                                              |

## Vragenlijst PRIMA studie 39 weken - PRODISQ - Zorggebruik

| Number | Question | Answers |
|--------|----------|---------|
|--------|----------|---------|

Wij willen graag weten met welke dokters u in de afgelopen 3 maanden een afspraak had. Het gaat om afspraken voor uzelf. Ook andere zorgverleners tellen mee. Bijvoorbeeld de fysiotherapeut.

- 1  
2  
3  
4  
5
- 2.1 Bent u in de afgelopen 3 maanden naar uw huisarts geweest?  Nee  
 Ja
- 
- 6  
7  
8  
9  
10  
11
- 2.1.1 ***If 'Bent u in de afgelopen 3 maanden naar uw huisarts geweest?' is equal to 'Ja' answer this question:***  afspraken  
Hoeveel afspraken had u?
- 
- 12  
13  
14  
15
- 2.2 Bent u in de afgelopen 3 maanden in contact geweest met een maatschappelijk werker?  Nee  
 Ja
- 
- 16  
17  
18  
19  
20  
21
- 2.2.1 ***If 'Bent u in de afgelopen 3 maanden in contact geweest met een maatschappelijk werker?' is equal to 'Ja' answer this question:***  afspraken  
Hoeveel afspraken had u?
- 
- 22  
23  
24  
25
- 2.3 Bent u in de afgelopen 3 maanden naar een fysiotherapeut geweest? Of een caesartherapeut, therapeut mensendieck of een manueel therapeut?  Nee  
 Ja
- 
- 26  
27  
28  
29  
30  
31
- 2.3.1 ***If 'Bent u in de afgelopen 3 maanden naar een fysiotherapeut geweest? Of een caesartherapeut, therapeut mensendieck of een manueel therapeut?' is equal to 'Ja' answer this question:***  afspraken  
Hoeveel afspraken had u?
- 
- 32  
33  
34  
35  
36
- 2.4 Bent u in de afgelopen 3 maanden naar een ergotherapeut geweest?  Nee  
 Ja
- 
- 37  
38  
39  
40  
41
- 2.4.1 ***If 'Bent u in de afgelopen 3 maanden naar een ergotherapeut geweest?' is equal to 'Ja' answer this question:***  afspraken  
Hoeveel afspraken had u?
- 
- 42  
43  
44  
45
- 2.5 Bent u in de afgelopen 3 maanden naar een logopedist geweest?  Nee  
 Ja
- 
- 46  
47  
48  
49  
50  
51
- 2.5.1 ***If 'Bent u in de afgelopen 3 maanden naar een logopedist geweest?' is equal to 'Ja' answer this question:***  afspraken  
Hoeveel afspraken had u?
- 
- 52  
53  
54  
55
- 2.6 Bent u in de afgelopen 3 maanden naar een diëtist geweest?  Nee  
 Ja
- 
- 56  
57  
58  
59  
60
- 2.6.1 ***If 'Bent u in de afgelopen 3 maanden naar een diëtist geweest?' is equal to 'Ja' answer this question:***  afspraken  
Hoeveel afspraken had u?

1  
2  
3  
4  
5  
6  
7  
8  
9  
10  
11  
12  
13  
14  
15  
16  
17  
18  
19  
20  
21  
22  
23  
24  
25  
26  
27  
28  
29  
30  
31  
32  
33  
34  
35  
36  
37  
38  
39  
40  
41  
42  
43  
44  
45  
46  
47  
48  
49  
50  
51  
52  
53  
54  
55  
56  
57  
58  
59  
60

|          |                                                                                                                                                                                                                                                                           |                                                                                                                                                                                                                                                                                                     |
|----------|---------------------------------------------------------------------------------------------------------------------------------------------------------------------------------------------------------------------------------------------------------------------------|-----------------------------------------------------------------------------------------------------------------------------------------------------------------------------------------------------------------------------------------------------------------------------------------------------|
| 2.7      | Bent u in de afgelopen 3 maanden naar een homeopaat geweest? Of een acupuncturist?                                                                                                                                                                                        | <input type="radio"/> Nee<br><input type="radio"/> Ja                                                                                                                                                                                                                                               |
| 2.7.1    | <b>If 'Bent u in de afgelopen 3 maanden naar een homeopaat geweest? Of een acupuncturist?' is equal to 'Ja' answer this question:</b><br>Hoeveel afspraken had u?                                                                                                         | <input type="text"/> afspraken                                                                                                                                                                                                                                                                      |
| 2.8      | Bent u in de afgelopen 3 maanden naar een psycholoog geweest? Of een psychotherapeut of psychiater?                                                                                                                                                                       | <input type="radio"/> Nee<br><input type="radio"/> Ja                                                                                                                                                                                                                                               |
| 2.8.1    | <b>If 'Bent u in de afgelopen 3 maanden naar een psycholoog geweest? Of een psychotherapeut of psychiater?' is equal to 'Ja' answer this question:</b><br>Hoeveel afspraken had u?                                                                                        | <input type="text"/> afspraken                                                                                                                                                                                                                                                                      |
| 2.9      | Heeft u in de afgelopen 3 maanden afspraken gehad met de bedrijfsarts?                                                                                                                                                                                                    | <input type="radio"/> Nee<br><input type="radio"/> Ja                                                                                                                                                                                                                                               |
| 2.9.1    | <b>If 'Heeft u in de afgelopen 3 maanden afspraken gehad met de bedrijfsarts?' is equal to 'Ja' answer this question:</b><br>Hoeveel afspraken had u?                                                                                                                     | <input type="text"/> afspraken                                                                                                                                                                                                                                                                      |
| 2.10     | Heeft u in de afgelopen 3 maanden hulp van de thuiszorg gehad?                                                                                                                                                                                                            | <input type="radio"/> Ja<br><input type="radio"/> Nee                                                                                                                                                                                                                                               |
| 2.10.1   | <b>If 'Heeft u in de afgelopen 3 maanden hulp van de thuiszorg gehad?' is equal to 'Ja' answer this question:</b><br>Wat voor hulp van de thuiszorg heeft u gehad in de afgelopen 3 maanden?                                                                              | <input type="checkbox"/> Huishoudelijke hulp; voorbeeld: stofzuigen, bed opmaken, boodschappen doen<br><input type="checkbox"/> Verzorging van uzelf; voorbeeld: hulp bij douchen of aankleden<br><input type="checkbox"/> Verpleging; voorbeeld: verband omdoen, medicijnen geven, bloeddruk meten |
| 2.10.1.1 | <b>If 'Wat voor hulp van de thuiszorg heeft u gehad in de afgelopen 3 maanden?' is equal to 'Huishoudelijke hulp; voorbeeld: stofzuigen, bed opmaken, boodschappen doen' answer this question:</b><br>Hoeveel weken heeft u deze thuiszorg gehad?<br>Huishoudelijke hulp: | <input type="text"/> weken in de afgelopen 3 maanden                                                                                                                                                                                                                                                |
| 2.10.1.2 | <b>If 'Wat voor hulp van de thuiszorg heeft u gehad in de afgelopen 3 maanden?' is equal to 'Verzorging van uzelf; voorbeeld: hulp bij douchen of aankleden' answer this question:</b><br>Hoeveel weken heeft u deze thuiszorg gehad?<br>Verzorging van uzelf:            | <input type="text"/> weken in de afgelopen 3 maanden                                                                                                                                                                                                                                                |

- 1  
2  
3  
4  
5  
6  
7  
8
- 2.10.1.3 **If 'Wat voor hulp van de thuiszorg heeft u gehad in de afgelopen 3 maanden?' is equal to 'Verpleging; voorbeeld: verband omdoen, medicijnen geven, bloeddruk meten' answer this question:**  
Hoeveel weken heeft u deze thuiszorg gehad?  
Verpleging:  weken in de afgelopen 3 maanden
- 9  
10  
11  
12  
13  
14  
15  
16  
17
- 2.10.1.4 **If 'Wat voor hulp van de thuiszorg heeft u gehad in de afgelopen 3 maanden?' is equal to 'Huishoudelijke hulp; voorbeeld: stofzuigen, bed opmaken, boodschappen doen' answer this question:**  
Hoeveel uur thuiszorg kreeg u in deze weken gemiddeld? Huishoudelijke hulp: gemiddeld  uur in de week
- 18  
19  
20  
21  
22  
23  
24  
25
- 2.10.1.5 **If 'Wat voor hulp van de thuiszorg heeft u gehad in de afgelopen 3 maanden?' is equal to 'Verzorging van uzelf; voorbeeld: hulp bij douchen of aankleden' answer this question:**  
Hoeveel uur thuiszorg kreeg u in deze weken gemiddeld? Verzorging van uzelf: gemiddeld  uur in de week
- 26  
27  
28  
29  
30  
31  
32
- 2.10.1.6 **If 'Wat voor hulp van de thuiszorg heeft u gehad in de afgelopen 3 maanden?' is equal to 'Verpleging; voorbeeld: verband omdoen, medicijnen geven, bloeddruk meten' answer this question:**  
Hoeveel uur thuiszorg kreeg u in deze weken gemiddeld? Verpleging: gemiddeld  uur in de week
- 33  
34  
35  
36
- 2.11 Heeft u in de afgelopen 3 maanden medicijnen gebruikt?  Ja  Nee
- 37  
38  
39  
40  
41  
42
- 2.11.1 **If 'Heeft u in de afgelopen 3 maanden medicijnen gebruikt?' is equal to 'Ja' answer this question:**  
Welke medicijnen heeft u in de afgelopen 3 maanden gebruikt?
- 43  
44  
45  
46  
47
- 2.12 Bent u in de afgelopen 3 maanden op de spoedeisende eerste hulp van een ziekenhuis geweest? (Een andere naam voor spoedeisende eerste hulp is EHBO)  Nee  Ja
- 48  
49  
50  
51  
52  
53  
54  
55
- 2.12.1 **If 'Bent u in de afgelopen 3 maanden op de spoedeisende eerste hulp van een ziekenhuis geweest? (Een andere naam voor spoedeisende eerste hulp is EHBO)' is equal to 'Ja' answer this question:**  
Hoe vaak bent u geweest?  keer
- 56  
57  
58  
59  
60
- 2.13 Bent u in de afgelopen 3 maanden met een ambulance naar het ziekenhuis gebracht? (Een andere naam voor ambulance is ziekenauto)  Nee  Ja

1  
2  
3  
4  
5  
6  
7

2.13.1 **If 'Bent u in de afgelopen 3 maanden met een ambulance naar het ziekenhuis gebracht? (Een andere naam voor ambulance is ziekenauto)' is equal to 'Ja' answer this question:**  
Hoe vaak bent u naar het ziekenhuis gebracht?

keer

8  
9  
10  
11  
12

2.14 Had u in de afgelopen 3 maanden een afspraak bij de polikliniek van het ziekenhuis? (Het gaat om afspraken voor uzelf met een dokter. Bijvoorbeeld met de cardioloog, reumatoloog of neuroloog)

Ja  
 Nee

13  
14  
15  
16  
17  
18  
19  
20  
21

2.14.1 **If 'Had u in de afgelopen 3 maanden een afspraak bij de polikliniek van het ziekenhuis? (Het gaat om afspraken voor uzelf met een dokter. Bijvoorbeeld met de cardioloog, reumatoloog of neuroloog)' is equal to 'Ja' answer this question:**  
Bij welke soorten dokters bent u in de afgelopen 3 maanden in het ziekenhuis geweest? En hoe vaak?

22  
23  
24  
25  
26

2.15 Bent u in de afgelopen 3 maanden overdag in het ziekenhuis geweest voor een behandeling? (U bleef dus niet slapen. U kwam bijvoorbeeld voor een bloedtransfusie, nierdialyse of chemokuur)

Ja  
 Nee

27  
28  
29  
30  
31  
32  
33  
34

2.15.1 **If 'Bent u in de afgelopen 3 maanden overdag in het ziekenhuis geweest voor een behandeling? (U bleef dus niet slapen. U kwam bijvoorbeeld voor een bloedtransfusie, nierdialyse of chemokuur)' is equal to 'Ja' answer this question:**  
Voor welke soort behandeling was dit?

35  
36  
37  
38  
39  
40  
41  
42

2.15.2 **If 'Bent u in de afgelopen 3 maanden overdag in het ziekenhuis geweest voor een behandeling? (U bleef dus niet slapen. U kwam bijvoorbeeld voor een bloedtransfusie, nierdialyse of chemokuur)' is equal to 'Ja' answer this question:**  
Hoeveel keer moest u in de afgelopen 3 maanden voor deze behandelingen naar het ziekenhuis?

43  
44  
45  
46  
47  
48  
49

2.16 Bent u in de afgelopen 3 maanden ergens anders geweest voor een behandeling overdag? (U bleef dus niet slapen. U ging bijvoorbeeld naar de dagopvang van een woon-/zorgcentrum of een psychiatrische instelling. Of naar de dagbehandeling van een revalidatiecentrum)

Ja  
 Nee

50  
51  
52  
53  
54  
55  
56  
57  
58  
59  
60

2.16.1 **If 'Bent u in de afgelopen 3 maanden ergens anders geweest voor een behandeling overdag? (U bleef dus niet slapen. U ging bijvoorbeeld naar de dagopvang van een woon-/zorgcentrum of een psychiatrische instelling. Of naar de dagbehandeling van een revalidatiecentrum)' is equal to 'Ja' answer this question:**  
Wat voor instelling was dit?

Woon-/zorgcentrum  
 Revalidatiecentrum  
 Psychiatrische instelling  
 Een andere instelling, namelijk

1  
2  
3  
4  
5  
6  
7  
8  
9  
10  
11  
12  
13  
14  
15  
16  
17  
18  
19  
20  
21  
22  
23  
24  
25  
26  
27  
28  
29  
30  
31  
32  
33  
34  
35  
36  
37  
38  
39  
40  
41  
42  
43  
44  
45  
46  
47  
48  
49  
50  
51  
52  
53  
54  
55  
56  
57  
58  
59  
60

|          |                                                                                                                                                                                                                                                                                                 |                                                       |
|----------|-------------------------------------------------------------------------------------------------------------------------------------------------------------------------------------------------------------------------------------------------------------------------------------------------|-------------------------------------------------------|
| 2.16.1.1 | <b>If 'Wat voor instelling was dit?' is equal to 'Een andere instelling, namelijk' answer this question:</b><br>Wat voor instelling was dit?                                                                                                                                                    | <input type="text"/>                                  |
| 2.16.1.2 | <b>If 'Wat voor instelling was dit?' is equal to 'Woon-/zorgcentrum' answer this question:</b><br>Hoe vaak moest u hier in de afgelopen 3 maanden naartoe? Naar het woon-/zorgcentrum:                                                                                                          | <input type="text"/> keer in de afgelopen 3 maanden   |
| 2.16.1.3 | <b>If 'Wat voor instelling was dit?' is equal to 'Revalidatiecentrum' answer this question:</b><br>Hoe vaak moest u hier in de afgelopen 3 maanden naartoe? Naar het revalidatiecentrum:                                                                                                        | <input type="text"/> keer in de afgelopen 3 maanden   |
| 2.16.1.4 | <b>If 'Wat voor instelling was dit?' is equal to 'Psychiatrische instelling' answer this question:</b><br>Hoe vaak moest u hier in de afgelopen 3 maanden naartoe? Naar de psychiatrische instelling:                                                                                           | <input type="text"/> keer in de afgelopen 3 maanden   |
| 2.16.1.5 | <b>If 'Wat voor instelling was dit?' is equal to 'Een andere instelling, namelijk' answer this question:</b><br>Hoe vaak moest u hier in de afgelopen 3 maanden naartoe? Naar de andere instelling:                                                                                             | <input type="text"/> keer in de afgelopen 3 maanden   |
| 2.17     | Heeft u in de afgelopen 3 maanden weleens in het ziekenhuis gelegen? (U moest dus blijven slapen. Bijvoorbeeld omdat u geopereerd was en niet meteen naar huis kon)                                                                                                                             | <input type="radio"/> Ja<br><input type="radio"/> Nee |
| 2.17.1   | <b>If 'Heeft u in de afgelopen 3 maanden weleens in het ziekenhuis gelegen? (U moest dus blijven slapen. Bijvoorbeeld omdat u geopereerd was en niet meteen naar huis kon)' is equal to 'Ja' answer this question:</b><br>Hoe vaak heeft u in de afgelopen 3 maanden in het ziekenhuis gelegen? | <input type="text"/> keer in de afgelopen 3 maanden   |
| 2.17.2   | <b>If 'Heeft u in de afgelopen 3 maanden weleens in het ziekenhuis gelegen? (U moest dus blijven slapen. Bijvoorbeeld omdat u geopereerd was en niet meteen naar huis kon)' is equal to 'Ja' answer this question:</b><br>Hoe lang heeft u in het ziekenhuis gelegen?                           | <input type="text"/> dagen in de afgelopen 3 maanden  |
| 2.18     | Moest u in de afgelopen 3 maanden ergens anders blijven slapen voor uw gezondheid? (Bijvoorbeeld in een woon-/zorgcentrum, psychiatrische instelling of revalidatiecentrum)                                                                                                                     | <input type="radio"/> Ja<br><input type="radio"/> Nee |

- 1  
2  
3  
4  
5  
6  
7  
8
- 2.18.1 **If 'Moest u in de afgelopen 3 maanden ergens anders blijven slapen voor uw gezondheid? (Bijvoorbeeld in een woon-/zorgcentrum, psychiatrische instelling of revalidatiecentrum)' is equal to 'Ja' answer this question:**  
Wat voor instelling was dit?
- Woon-/zorgcentrum  
 Revalidatiecentrum  
 Psychiatrische instelling  
 Een andere instelling, namelijk
- 
- 9  
10  
11  
12  
13  
14
- 2.18.1.1 **If 'Wat voor instelling was dit?' is equal to 'Een andere instelling, namelijk' answer this question:**  
Een andere instelling, namelijk
- 
- 
- 15  
16  
17  
18  
19
- 2.18.1.2 **If 'Wat voor instelling was dit?' is equal to 'Woon-/zorgcentrum' answer this question:**  
Hoe lang bent u in deze instelling geweest? In het woon-/zorgcentrum:
- dagen in de afgelopen 3 maanden
- 
- 20  
21  
22  
23  
24  
25
- 2.18.1.3 **If 'Wat voor instelling was dit?' is equal to 'Revalidatiecentrum' answer this question:**  
Hoe lang bent u in deze instelling geweest? In het revalidatiecentrum:
- dagen in de afgelopen 3 maanden
- 
- 26  
27  
28  
29  
30
- 2.18.1.4 **If 'Wat voor instelling was dit?' is equal to 'Psychiatrische instelling' answer this question:**  
Hoe lang bent u in deze instelling geweest? In de psychiatrische instelling:
- dagen in de afgelopen 3 maanden
- 
- 31  
32  
33  
34  
35
- 2.18.1.5 **If 'Wat voor instelling was dit?' is equal to 'Een andere instelling, namelijk' answer this question:**  
Hoe lang bent u in deze instelling geweest? In de andere instelling:
- dagen in de afgelopen 3 maanden
- 
- 36  
37  
38  
39  
40
- 2.19 Heeft u in de afgelopen 3 maanden hulp gekregen van een familielid of een bekende vanwege uw lichamelijke of psychische problemen?
- Ja  
 Nee
- 
- 41  
42  
43  
44  
45  
46  
47  
48  
49  
50  
51  
52  
53  
54  
55  
56  
57  
58  
59  
60
- 2.19.1 **If 'Heeft u in de afgelopen 3 maanden hulp gekregen van een familielid of een bekende vanwege uw lichamelijke of psychische problemen?' is equal to 'Ja' answer this question:**  
Wat voor hulp van familieleden of bekenden heeft u gehad in de afgelopen 3 maanden?
- Huishoudelijke hulp - voorbeeld: stofzuigen, bed opmaken, boodschappen doen, klaarmaken van eten en drinken, verzorgen van kinderen  
 Verzorging van uzelf - voorbeeld: hulp bij douchen of aankleden, hulp bij het eten en drinken of het geven van medicijnen  
 Praktische hulp - voorbeeld: ondersteuning bij wandelen, het maken van uitstapjes of bezoeken aan bekenden, bezoeken aan de huisarts of het ziekenhuis, het regelen van hulp of het regelen van financiële zaken

- 1  
2  
3  
4  
5  
6  
7  
8  
9  
10
- 2.19.1.1 ***If 'Wat voor hulp van familieleden of bekenden heeft u gehad in de afgelopen 3 maanden?' is equal to 'Huishoudelijke hulp - voorbeeld: stofzuigen, bed opmaken, boodschappen doen, klaarmaken van eten en drinken, verzorgen van kinderen' answer this question:***  
Hoeveel weken heeft u deze hulp gehad?  
Huishoudelijke hulp:
- weken in de afgelopen 3 maanden
- 
- 11  
12  
13  
14  
15  
16  
17  
18  
19
- 2.19.1.2 ***If 'Wat voor hulp van familieleden of bekenden heeft u gehad in de afgelopen 3 maanden?' is equal to 'Verzorging van uzelf - voorbeeld: hulp bij douchen of aankleden, hulp bij het eten en drinken of het geven van medicijnen' answer this question:***  
Hoeveel weken heeft u deze hulp gehad? Verzorging van uzelf:
- weken in de afgelopen 3 maanden
- 
- 20  
21  
22  
23  
24  
25  
26  
27  
28  
29  
30  
31
- 2.19.1.3 ***If 'Wat voor hulp van familieleden of bekenden heeft u gehad in de afgelopen 3 maanden?' is equal to 'Praktische hulp - voorbeeld: ondersteuning bij wandelen, het maken van uitstapjes of bezoeken aan bekenden, bezoeken aan de huisarts of het ziekenhuis, het regelen van hulp of het regelen van financiële zaken' answer this question:***  
Hoeveel uur hulp kreeg u in deze weken gemiddeld?  
Praktische hulp:
- weken in de afgelopen 3 maanden
- 
- 32  
33  
34  
35  
36  
37  
38  
39  
40  
41
- 2.19.1.4 ***If 'Wat voor hulp van familieleden of bekenden heeft u gehad in de afgelopen 3 maanden?' is equal to 'Huishoudelijke hulp - voorbeeld: stofzuigen, bed opmaken, boodschappen doen, klaarmaken van eten en drinken, verzorgen van kinderen' answer this question:***  
Hoeveel uur hulp kreeg u in deze weken gemiddeld?  
Huishoudelijke hulp: gemiddeld
- uur in de week
- 
- 42  
43  
44  
45  
46  
47  
48  
49
- 2.19.1.5 ***If 'Wat voor hulp van familieleden of bekenden heeft u gehad in de afgelopen 3 maanden?' is equal to 'Verzorging van uzelf - voorbeeld: hulp bij douchen of aankleden, hulp bij het eten en drinken of het geven van medicijnen' answer this question:***  
Hoeveel uur hulp kreeg u in deze weken gemiddeld?  
Verzorging van uzelf: gemiddeld
- uur in de week
- 
- 50  
51  
52  
53  
54  
55  
56  
57  
58  
59  
60
- 2.19.1.6 ***If 'Wat voor hulp van familieleden of bekenden heeft u gehad in de afgelopen 3 maanden?' is equal to 'Praktische hulp - voorbeeld: ondersteuning bij wandelen, het maken van uitstapjes of bezoeken aan bekenden, bezoeken aan de huisarts of het ziekenhuis, het regelen van hulp of het regelen van financiële zaken' answer this question:***  
Hoeveel uur hulp kreeg u in deze weken gemiddeld?  
Praktische hulp: gemiddeld
- uur in de week



## Vragenlijst PRIMA studie 39 weken - Dank

| Number | Question                                                                                                                                      | Answers                                                                  |
|--------|-----------------------------------------------------------------------------------------------------------------------------------------------|--------------------------------------------------------------------------|
| 3.1    | Hartelijk dank voor de tijd die u heeft genomen om de vragenlijsten in te vullen. Indien u nog opmerkingen heeft kunt u deze hierin plaatsen. | <div style="border: 1px dashed black; height: 60px; width: 100%;"></div> |

## Survey 'Vragenlijst PRIMA studie 5 jaar'

### Vragenlijst PRIMA studie 5 jaar - AOFAS - Pijn

| Number | Question                            | Answers                                                                                                                                                                                                         |
|--------|-------------------------------------|-----------------------------------------------------------------------------------------------------------------------------------------------------------------------------------------------------------------|
| 1.1    | Hoeveel pijn ervaart u aan uw voet? | <input type="checkbox"/> Geen<br><input type="checkbox"/> Milde pijnklachten of af en toe pijn<br><input type="checkbox"/> Matige pijnklachten, dagelijks<br><input type="checkbox"/> Vrijwel continu erge pijn |

### Vragenlijst PRIMA studie 5 jaar - AOFAS resterende gedeelte

| Number | Question                                              | Answers                                                                                                                                                                                                                                                                                                                                                                                                                                           |
|--------|-------------------------------------------------------|---------------------------------------------------------------------------------------------------------------------------------------------------------------------------------------------------------------------------------------------------------------------------------------------------------------------------------------------------------------------------------------------------------------------------------------------------|
| 2.1    | Hoeveel beperkingen in het dagelijks leven ervaart u? | <input type="radio"/> Geen beperkingen, geen hulpmiddelen nodig<br><input type="radio"/> Geen beperkingen in algemeen dagelijkse bezigheden, wel beperkingen in recreatieve activiteiten (sport, hobbies, etc) geen ondersteuning<br><input type="radio"/> Beperkingen bij dagelijkse- en recreatieve activiteiten, stok<br><input type="radio"/> Ernstige beperkingen bij dagelijkse- en recreatieactiviteiten, walker, krukken, rolstoel, brace |

- 1  
2  
3  
4  
5  
6  
7  
8
- 
- 2.2 Wat is de afstand die u in één keer kunt lopen?
- Meer dan 600 meter
  - 400 - 600 meter
  - 100 - 300 meter
  - Minder dan 100 meter
- 
- 9  
10  
11  
12  
13  
14  
15  
16
- 2.3 Heeft u moeite met lopen op een bepaalde ondergrond?
- Geen problemen bij lopen
  - Enig problemen op ongelijke ondergrond, trap, helling, ladders
  - Ernstige problemen bij ongelijke ondergrond, trap, helling, ladders
- 
- 17  
18  
19  
20  
21  
22
- 2.4 Hoe zou u uw looppatroon beoordelen?
- Normaal of minimaal afwijkend
  - Duidelijk
  - Ernstig
- 
- 23  
24  
25  
26  
27  
28  
29
- 2.5 Hoe zou u de beweeglijkheid van uw voet beoordelen ten opzichte van de andere zijde of ten opzichte van vóór het ongeval?
- Hetzelfde of licht beperkt t.o.v. de niet aangedane zijde of zoals voor het ongeval
  - Ongeveer de helft beperkt
  - Sterk verminderd, bijna geen bewegingen mogelijk
- 
- 30  
31  
32  
33  
34  
35  
36  
37
- 2.6 Hoe zou u de beweeglijkheid van uw enkel beoordelen ten opzichte van de andere zijde of ten opzichte van voor het ongeval?
- Hetzelfde of licht beperkt t.o.v. de niet aangedane zijde of zoals voor het ongeval
  - Ongeveer de helft beperkt
  - Sterk verminderd, bijna geen bewegingen mogelijk
- 
- 38  
39  
40  
41  
42  
43
- 2.7 Hoe zou u de stabiliteit van uw voet en enkel beoordelen
- Stabiel, ik verzwik mijn enkel hooguit incidenteel
  - Niet stabiel, ik verzwik mijn enkel vaak
- 
- 44  
45  
46  
47  
48  
49  
50  
51  
52  
53  
54  
55  
56  
57  
58  
59  
60
- 2.8 Hoe zou u de stand van uw voet beoordelen ten opzichte van de andere zijde of ten opzichte van voor het ongeval?
- Goed, ik kan mijn voet goed plat op de grond zetten, waarbij de stand niet afwijkend is
  - Ik sta vrijwel alleen op de buitenzijde van mijn voet
  - Ik kan mijn voet niet plat op de grond zetten en loop vrijwel alleen op mijn voorvoet

## Vragenlijst PRIMA studie 5 jaar - VAS Pain score

1  
2  
3  
4  
5  
6  
7  
8  
9  
10  
11  
12  
13  
14  
15  
16  
17  
18  
19  
20  
21  
22  
23  
24  
25  
26  
27  
28  
29  
30  
31  
32  
33  
34  
35  
36  
37  
38  
39  
40  
41  
42  
43  
44  
45  
46  
47  
48  
49  
50  
51  
52  
53  
54  
55  
56  
57  
58  
59  
60

| Number | Question                                                                                                                                                             | Answers             |
|--------|----------------------------------------------------------------------------------------------------------------------------------------------------------------------|---------------------|
| 3.1    | VAS pijnscore (Geef uw minimaal pijnscore aan tijdens dagelijkse activiteiten op een schaal van 0 tot 100, waarbij 0 geen pijn is en 100 de ergste pijn denkbaar is) | (0.00) 100 (100.00) |

## Vragenlijst PRIMA studie 5 jaar - AAS

| Number | Question | Answers |
|--------|----------|---------|
|--------|----------|---------|

- 1  
2  
3  
4  
5  
6  
7  
8  
9  
10  
11  
12  
13  
14  
15  
16  
17  
18  
19  
20  
21  
22  
23  
24  
25  
26  
27  
28  
29  
30  
31  
32  
33  
34  
35  
36  
37  
38  
39  
40  
41  
42  
43  
44  
45  
46  
47  
48  
49  
50  
51  
52  
53  
54  
55  
56  
57  
58  
59  
60
- 4.1 Wat is het meest bij u van toepassing ten aanzien van uw activiteit?
- American Football
  - Basketbal
  - Gymnastiek/turnen
  - Handbal
  - Rugby
  - Voetbal
  - Hockey
  - Korfbal
  - Gevechtssporten: judo, karate, kung fu, taekwando, jiu jitsu, etc.
  - Oriëntatiewandelen
  - Rhythmische gymnastiek
  - Volleybal
  - Boxen
  - Freestyle snowboarden
  - IJshockey
  - Tennis
  - Worstelen
  - Fitness, aerobics
  - Badminton
  - Baseball
  - Cross-country hardlopen
  - Moderne pentathlon
  - Squash
  - Surfen, windsurfen
  - Tafel tennis
  - Atletiek: spring-, werponderdelen
  - Waterskiën
  - Dans
  - Schermen
  - Zaalhockey
  - Bergbeklimmen
  - Langlauf
  - Parachute springen
  - Softball
  - Speciale beroepen en werkactiviteiten; speciale beroepen: ballet, professioneel soldaat, speciale reddingswerker, stuntman, etc.
  - Duiken
  - Scubaduiken
  - Skaten, in-line skaten
  - Atletiek: looponderdelen
  - Triatlon
  - Gewichtsheffen, body-building

- Alle competitieve sporten hieronder met 'seasonal' conditioning
- Zwaar fysiek werk
- Alpine skiën en snowboarden
- Bowlen/curlen
- Golf
- Mountainbike/BMX
- Powerliften
- Zeilen
- Fysiek werk
- Wielrennen
- Paardrijden
- Motorsporten/technische sporten
- Roeien, kayakken
- Boogschieten
- Water polo en zwemmen
- Kunnen lopen op oneven grond
- Geen sport, echter geen limitatie in dagelijkse activiteiten
- Kunnen lopen op even grond, maar de dagelijkse activiteiten zijn gelimiteerd
- Niet kunnen lopen, fysieke handicap wegens enkelproblemen

- 
- 4.1.1 ***If 'Wat is het meest bij u van toepassing ten aanzien van uw acitviteit?' is equal to 'American Football' answer this question:***  
American Football
- Professioneel
- Competitief
- Recreatief
- 
- 4.1.2 ***If 'Wat is het meest bij u van toepassing ten aanzien van uw acitviteit?' is equal to 'Basketbal' answer this question:***  
Basketbal
- Professioneel
- Competitief
- Recreatief
- 
- 4.1.3 ***If 'Wat is het meest bij u van toepassing ten aanzien van uw acitviteit?' is equal to 'Gymnastiek/turnen' answer this question:***  
Gymnastiek/turnen
- Professioneel
- Competitief
- Recreatief
- 
- 4.1.4 ***If 'Wat is het meest bij u van toepassing ten aanzien van uw acitviteit?' is equal to 'Handbal' answer this question:***  
Handbal
- Professioneel
- Competitief
- Recreatief
- 
- 4.1.5 ***If 'Wat is het meest bij u van toepassing ten aanzien van uw acitviteit?' is equal to 'Rugby' answer this question:***  
Rugby
- Professioneel
- Competitief
- Recreatief

|    |        |                                                                                                                                                                                          |                                     |
|----|--------|------------------------------------------------------------------------------------------------------------------------------------------------------------------------------------------|-------------------------------------|
| 1  |        |                                                                                                                                                                                          |                                     |
| 2  | 4.1.6  | <b>If 'Wat is het meest bij u van toepassing ten aanzien van uw acitiviteit?' is equal to 'Voetbal' answer this question:</b>                                                            | <input type="radio"/> Professioneel |
| 3  |        |                                                                                                                                                                                          | <input type="radio"/> Competitief   |
| 4  |        |                                                                                                                                                                                          | <input type="radio"/> Recreatief    |
| 5  |        | Voetbal                                                                                                                                                                                  |                                     |
| 6  |        |                                                                                                                                                                                          |                                     |
| 7  |        |                                                                                                                                                                                          |                                     |
| 8  | 4.1.7  | <b>If 'Wat is het meest bij u van toepassing ten aanzien van uw acitiviteit?' is equal to 'Hockey' answer this question:</b>                                                             | <input type="radio"/> Professioneel |
| 9  |        |                                                                                                                                                                                          | <input type="radio"/> Competitief   |
| 10 |        |                                                                                                                                                                                          | <input type="radio"/> Recreatief    |
| 11 |        | Hockey                                                                                                                                                                                   |                                     |
| 12 |        |                                                                                                                                                                                          |                                     |
| 13 |        |                                                                                                                                                                                          |                                     |
| 14 | 4.1.8  | <b>If 'Wat is het meest bij u van toepassing ten aanzien van uw acitiviteit?' is equal to 'Korfbal' answer this question:</b>                                                            | <input type="radio"/> Professioneel |
| 15 |        |                                                                                                                                                                                          | <input type="radio"/> Competitief   |
| 16 |        |                                                                                                                                                                                          | <input type="radio"/> Recreatief    |
| 17 |        | Korfbal                                                                                                                                                                                  |                                     |
| 18 |        |                                                                                                                                                                                          |                                     |
| 19 |        |                                                                                                                                                                                          |                                     |
| 20 | 4.1.9  | <b>If 'Wat is het meest bij u van toepassing ten aanzien van uw acitiviteit?' is equal to 'Gevechtssporten: judo, karate, kung fu, taekwando, jiu jitsu, etc.' answer this question:</b> | <input type="radio"/> Professioneel |
| 21 |        |                                                                                                                                                                                          | <input type="radio"/> Competitief   |
| 22 |        |                                                                                                                                                                                          | <input type="radio"/> Recreatief    |
| 23 |        | Gevechtssporten: judo, karate, kung fu, taekwando, jiu                                                                                                                                   |                                     |
| 24 |        | jitsu, etc.                                                                                                                                                                              |                                     |
| 25 |        |                                                                                                                                                                                          |                                     |
| 26 |        |                                                                                                                                                                                          |                                     |
| 27 | 4.1.10 | <b>If 'Wat is het meest bij u van toepassing ten aanzien van uw acitiviteit?' is equal to 'Oriëntatielopen' answer this question:</b>                                                    | <input type="radio"/> Professioneel |
| 28 |        |                                                                                                                                                                                          | <input type="radio"/> Competitief   |
| 29 |        |                                                                                                                                                                                          | <input type="radio"/> Recreatief    |
| 30 |        | Oriëntatielopen                                                                                                                                                                          |                                     |
| 31 |        |                                                                                                                                                                                          |                                     |
| 32 |        |                                                                                                                                                                                          |                                     |
| 33 | 4.1.11 | <b>If 'Wat is het meest bij u van toepassing ten aanzien van uw acitiviteit?' is equal to 'Rhythmische gymnastiek' answer this question:</b>                                             | <input type="radio"/> Professioneel |
| 34 |        |                                                                                                                                                                                          | <input type="radio"/> Competitief   |
| 35 |        |                                                                                                                                                                                          | <input type="radio"/> Recreatief    |
| 36 |        | Rhythmisch gymnastiek                                                                                                                                                                    |                                     |
| 37 |        |                                                                                                                                                                                          |                                     |
| 38 |        |                                                                                                                                                                                          |                                     |
| 39 | 4.1.12 | <b>If 'Wat is het meest bij u van toepassing ten aanzien van uw acitiviteit?' is equal to 'Volleybal' answer this question:</b>                                                          | <input type="radio"/> Professioneel |
| 40 |        |                                                                                                                                                                                          | <input type="radio"/> Competitief   |
| 41 |        |                                                                                                                                                                                          | <input type="radio"/> Recreatief    |
| 42 |        | Volleybal                                                                                                                                                                                |                                     |
| 43 |        |                                                                                                                                                                                          |                                     |
| 44 | 4.1.13 | <b>If 'Wat is het meest bij u van toepassing ten aanzien van uw acitiviteit?' is equal to 'Boxen' answer this question:</b>                                                              | <input type="radio"/> Professioneel |
| 45 |        |                                                                                                                                                                                          | <input type="radio"/> Competitief   |
| 46 |        |                                                                                                                                                                                          | <input type="radio"/> Recreatief    |
| 47 |        | Boxen                                                                                                                                                                                    |                                     |
| 48 |        |                                                                                                                                                                                          |                                     |
| 49 |        |                                                                                                                                                                                          |                                     |
| 50 | 4.1.14 | <b>If 'Wat is het meest bij u van toepassing ten aanzien van uw acitiviteit?' is equal to 'Freestyle snowboarden' answer this question:</b>                                              | <input type="radio"/> Professioneel |
| 51 |        |                                                                                                                                                                                          | <input type="radio"/> Competitief   |
| 52 |        |                                                                                                                                                                                          | <input type="radio"/> Recreatief    |
| 53 |        | Freestyle snowboarden                                                                                                                                                                    |                                     |
| 54 |        |                                                                                                                                                                                          |                                     |
| 55 |        |                                                                                                                                                                                          |                                     |
| 56 | 4.1.15 | <b>If 'Wat is het meest bij u van toepassing ten aanzien van uw acitiviteit?' is equal to 'Freestyle snowboarden' answer this question:</b>                                              | <input type="radio"/> Professioneel |
| 57 |        |                                                                                                                                                                                          | <input type="radio"/> Competitief   |
| 58 |        |                                                                                                                                                                                          | <input type="radio"/> Recreatief    |
| 59 |        | IJshockey                                                                                                                                                                                |                                     |
| 60 |        |                                                                                                                                                                                          |                                     |

- 1  
2  
3  
4  
5  
6  
7
- 
- 4.1.16 ***If 'Wat is het meest bij u van toepassing ten aanzien van uw acitiviteit?' is equal to 'Tennis' answer this question:***  
Tennis  Professioneel  
 Competitief  
 Recreatief
- 
- 8  
9  
10  
11  
12
- 4.1.17 ***If 'Wat is het meest bij u van toepassing ten aanzien van uw acitiviteit?' is equal to 'Worstelen' answer this question:***  
Worstelen  Professioneel  
 Competitief  
 Recreatief
- 
- 13  
14  
15  
16  
17  
18
- 4.1.18 ***If 'Wat is het meest bij u van toepassing ten aanzien van uw acitiviteit?' is equal to 'Fitness, aerobics' answer this question:***  
Fitness, aerobics  Professioneel  
 Competitief  
 Recreatief
- 
- 19  
20  
21  
22  
23  
24
- 4.1.19 ***If 'Wat is het meest bij u van toepassing ten aanzien van uw acitiviteit?' is equal to 'Badminton' answer this question:***  
Badminton  Professioneel  
 Competitief  
 Recreatief
- 
- 25  
26  
27  
28  
29  
30
- 4.1.20 ***If 'Wat is het meest bij u van toepassing ten aanzien van uw acitiviteit?' is equal to 'Baseball' answer this question:***  
Baseball  Professioneel  
 Competitief  
 Recreatief
- 
- 31  
32  
33  
34  
35
- 4.1.21 ***If 'Wat is het meest bij u van toepassing ten aanzien van uw acitiviteit?' is equal to 'Cross-country hardlopen' answer this question:***  
Cross-country hardlopen  Professioneel  
 Competitief  
 Recreatief
- 
- 36  
37  
38  
39  
40  
41
- 4.1.22 ***If 'Wat is het meest bij u van toepassing ten aanzien van uw acitiviteit?' is equal to 'Moderne pentathlon' answer this question:***  
Moderne pentathlon  Professioneel  
 Competitief  
 Recreatief
- 
- 42  
43  
44  
45  
46  
47
- 4.1.23 ***If 'Wat is het meest bij u van toepassing ten aanzien van uw acitiviteit?' is equal to 'Squash' answer this question:***  
Squash  Professioneel  
 Competitief  
 Recreatief
- 
- 48  
49  
50  
51  
52  
53
- 4.1.24 ***If 'Wat is het meest bij u van toepassing ten aanzien van uw acitiviteit?' is equal to 'Surfen, windsurfen' answer this question:***  
Surfen, windsurfen  Professioneel  
 Competitief  
 Recreatief
- 
- 54  
55  
56  
57  
58  
59  
60
- 4.1.25 ***If 'Wat is het meest bij u van toepassing ten aanzien van uw acitiviteit?' is equal to 'Tafel tennis' answer this question:***  
Tafel tennis  Professioneel  
 Competitief  
 Recreatief

- 1  
2  
3  
4  
5  
6  
7
- 4.1.26 **If 'Wat is het meest bij u van toepassing ten aanzien van uw acitiviteit?' is equal to 'Atletiek: spring-, werponderdelen' answer this question:**  
Atletiek: spring-, werponderdelen
- Professioneel  
 Competitief  
 Recreatief
- 
- 8  
9  
10  
11  
12
- 4.1.27 **If 'Wat is het meest bij u van toepassing ten aanzien van uw acitiviteit?' is equal to 'Waterskieën' answer this question:**  
Waterskien
- Professioneel  
 Competitief  
 Recreatief
- 
- 13  
14  
15  
16  
17  
18
- 4.1.28 **If 'Wat is het meest bij u van toepassing ten aanzien van uw acitiviteit?' is equal to 'Dans' answer this question:**  
Dans
- Professioneel  
 Competitief  
 Recreatief
- 
- 19  
20  
21  
22  
23  
24
- 4.1.29 **If 'Wat is het meest bij u van toepassing ten aanzien van uw acitiviteit?' is equal to 'Schermen' answer this question:**  
Schermen
- Professioneel  
 Competitief  
 Recreatief
- 
- 25  
26  
27  
28  
29  
30
- 4.1.30 **If 'Wat is het meest bij u van toepassing ten aanzien van uw acitiviteit?' is equal to 'Zaalhockey' answer this question:**  
Zaalhockey
- Professioneel  
 Competitief  
 Recreatief
- 
- 31  
32  
33  
34  
35
- 4.1.31 **If 'Wat is het meest bij u van toepassing ten aanzien van uw acitiviteit?' is equal to 'Bergbeklimmen' answer this question:**  
Bergbeklimmen
- Professioneel  
 Competitief  
 Recreatief
- 
- 36  
37  
38  
39  
40  
41
- 4.1.32 **If 'Wat is het meest bij u van toepassing ten aanzien van uw acitiviteit?' is equal to 'Langlauf' answer this question:**  
Langlauf
- Professioneel  
 Competitief  
 Recreatief
- 
- 42  
43  
44  
45  
46  
47
- 4.1.33 **If 'Wat is het meest bij u van toepassing ten aanzien van uw acitiviteit?' is equal to 'Parachute springen' answer this question:**  
Parachute springen
- Professioneel  
 Competitief  
 Recreatief
- 
- 48  
49  
50  
51  
52  
53  
54  
55  
56  
57  
58  
59  
60
- 4.1.34 **If 'Wat is het meest bij u van toepassing ten aanzien van uw acitiviteit?' is equal to 'Softball' answer this question:**  
Softball
- Professioneel  
 Competitief  
 Recreatief



- 1  
2  
3  
4  
5  
6  
7  
8  
9  
10  
11  
12
- 4.1.35 ***If 'Wat is het meest bij u van toepassing ten aanzien van uw acitiviteit?' is equal to 'Speciale beroepen en werkactiviteiten; speciale beroepen: ballet, professioneel soldaat, speciale reddingswerker, stuntman, etc.' answer this question:***  
Speciale beroepen en werkactiviteiten speciale beroepen: ballet, professioneel soldaat, speciale reddingswerker, stuntman, etc.
- ballet, professioneel soldaat, speciale reddingswerker, stuntman, etc.
- 
- 13  
14  
15  
16  
17
- 4.1.36 ***If 'Wat is het meest bij u van toepassing ten aanzien van uw acitiviteit?' is equal to 'Duiken' answer this question:***  
Duiken
- Professioneel/competitief  
 Recreatief
- 
- 18  
19  
20  
21  
22
- 4.1.37 ***If 'Wat is het meest bij u van toepassing ten aanzien van uw acitiviteit?' is equal to 'Scubaduiken' answer this question:***  
Scubaduiken
- Professioneel/competitief  
 Recreatief
- 
- 23  
24  
25  
26  
27  
28
- 4.1.38 ***If 'Wat is het meest bij u van toepassing ten aanzien van uw acitiviteit?' is equal to 'Skaten, in-line skaten' answer this question:***  
skaten, in-linen skaten
- Professioneel/competitief  
 Recreatief
- 
- 29  
30  
31  
32  
33
- 4.1.39 ***If 'Wat is het meest bij u van toepassing ten aanzien van uw acitiviteit?' is equal to 'Atletiek: looponderdelen' answer this question:***  
Atletiek: looponderdelen
- Professioneel/competitief  
 Recreatief
- 
- 34  
35  
36  
37  
38
- 4.1.40 ***If 'Wat is het meest bij u van toepassing ten aanzien van uw acitiviteit?' is equal to 'Triatlon' answer this question:***  
triatlon
- Professioneel/competitief  
 Recreatief
- 
- 39  
40  
41  
42  
43  
44  
45
- 4.1.41 ***If 'Wat is het meest bij u van toepassing ten aanzien van uw acitiviteit?' is equal to 'Gewichtsheffen, body-building' answer this question:***  
Gewichtsheffen, body-building
- Professioneel/competitief  
 Recreatief
- 
- 46  
47  
48  
49  
50  
51  
52
- 4.1.42 ***If 'Wat is het meest bij u van toepassing ten aanzien van uw acitiviteit?' is equal to 'Alle competitieve sporten hieronder met 'seasonal' conditioning' answer this question:***  
Alle competitieve sporten hieronder met 'seasonal' conditioning
- Alle competitieve sporten hieronder met 'seasonal' conditioning
- 
- 53  
54  
55  
56  
57  
58  
59  
60
- 4.1.43 ***If 'Wat is het meest bij u van toepassing ten aanzien van uw acitiviteit?' is equal to 'Zwaar fysiek werk' answer this question:***  
Zwaar fysiek werk
- Alle competitieve sporten hieronder met 'seasonal' conditioning

- 1  
2  
3  
4  
5  
6
- 
- 4.1.44 **If 'Wat is het meest bij u van toepassing ten aanzien van uw acitiviteit?' is equal to 'Alpine skiën en snowboarden' answer this question:**  
Alpine skien en snowboarden  Alpine skien en snowboarden
- 
- 7  
8  
9  
10  
11  
12
- 4.1.45 **If 'Wat is het meest bij u van toepassing ten aanzien van uw acitiviteit?' is equal to 'Bowlen/curlen' answer this question:**  
Bowlen/curlen  Bowlen/curlen
- 
- 13  
14  
15  
16  
17
- 4.1.46 **If 'Wat is het meest bij u van toepassing ten aanzien van uw acitiviteit?' is equal to 'Golf' answer this question:**  
Golf  Golf
- 
- 18  
19  
20  
21  
22
- 4.1.47 **If 'Wat is het meest bij u van toepassing ten aanzien van uw acitiviteit?' is equal to 'Mountainbike/BMX' answer this question:**  
Mountainbike/BMX  Mountainbike/BMX
- 
- 23  
24  
25  
26  
27  
28
- 4.1.48 **If 'Wat is het meest bij u van toepassing ten aanzien van uw acitiviteit?' is equal to 'Powerliften' answer this question:**  
Powerliften  Powerliften
- 
- 29  
30  
31  
32  
33
- 4.1.49 **If 'Wat is het meest bij u van toepassing ten aanzien van uw acitiviteit?' is equal to 'Zeilen' answer this question:**  
Zeilen  Zeilen
- 
- 34  
35  
36  
37  
38
- 4.1.50 **If 'Wat is het meest bij u van toepassing ten aanzien van uw acitiviteit?' is equal to 'Fysiek werk' answer this question:**  
Fysiek werk  Fysiek werk
- 
- 39  
40  
41  
42  
43  
44
- 4.1.51 **If 'Wat is het meest bij u van toepassing ten aanzien van uw acitiviteit?' is equal to 'Wielrennen' answer this question:**  
Wielrennen  Wielrennen
- 
- 45  
46  
47  
48  
49
- 4.1.52 **If 'Wat is het meest bij u van toepassing ten aanzien van uw acitiviteit?' is equal to 'Paardrijden' answer this question:**  
Paardrijden  Paardrijden
- 
- 50  
51  
52  
53  
54  
55
- 4.1.53 **If 'Wat is het meest bij u van toepassing ten aanzien van uw acitiviteit?' is equal to 'Motorsporten/technische sporten' answer this question:**  
Motorsporten/technische sporten  Motorsporten/technische sporten
- 
- 56  
57  
58  
59  
60
- 4.1.54 **If 'Wat is het meest bij u van toepassing ten aanzien van uw acitiviteit?' is equal to 'Roeien, kayakken' answer this question:**  
Roeien, kayakken  Roeien, kayakken

|        |                                                                                                                                                                                                                                                                                   |                                                                                                    |
|--------|-----------------------------------------------------------------------------------------------------------------------------------------------------------------------------------------------------------------------------------------------------------------------------------|----------------------------------------------------------------------------------------------------|
| 4.1.55 | <b>If 'Wat is het meest bij u van toepassing ten aanzien van uw activiteit?' is equal to 'Boogschieten' answer this question:</b><br>Boogschieten                                                                                                                                 | <input type="radio"/> Boogschieten                                                                 |
| 4.1.56 | <b>If 'Wat is het meest bij u van toepassing ten aanzien van uw activiteit?' is equal to 'Water polo en zwemmen' answer this question:</b><br>Water polo en zwemmen                                                                                                               | <input type="radio"/> Water polo en zwemmen                                                        |
| 4.1.57 | <b>If 'Wat is het meest bij u van toepassing ten aanzien van uw activiteit?' is equal to 'Kunnen lopen op oneven grond' answer this question:</b><br>Kunnen lopen op oneven grond                                                                                                 | <input type="radio"/> Kunnen lopen op oneven grond                                                 |
| 4.1.58 | <b>If 'Wat is het meest bij u van toepassing ten aanzien van uw activiteit?' is equal to 'Geen sport, echter geen limitatie in dagelijkse activiteiten' answer this question:</b><br>Geen sport, echter geen limitatie in dagelijkse activiteiten                                 | <input type="radio"/> Geen sport, echter geen limitatie in dagelijkse activiteiten                 |
| 4.1.59 | <b>If 'Wat is het meest bij u van toepassing ten aanzien van uw activiteit?' is equal to 'Kunnen lopen op even grond, maar de dagelijkse activiteiten zijn gelimiteerd' answer this question:</b><br>Kunnen lopen op even grond, maar de dagelijkse activiteiten zijn gelimiteerd | <input type="radio"/> Kunnen lopen op even grond, maar de dagelijkse activiteiten zijn gelimiteerd |
| 4.1.60 | <b>If 'Wat is het meest bij u van toepassing ten aanzien van uw activiteit?' is equal to 'Niet kunnen lopen, fysieke handicap wegens enkelproblemen' answer this question:</b><br>Niet kunnen lopen, fysieke handicap wegens enkelproblemen                                       | <input type="radio"/> Niet kunnen lopen, fysieke handicap wegens enkelproblemen                    |

## Vragenlijst PRIMA studie 5 jaar - Hoe tevreden bent u over de enkelklachten?

| Number | Question                                   | Answers                                                                                                                       |
|--------|--------------------------------------------|-------------------------------------------------------------------------------------------------------------------------------|
| 5.1    | Hoe tevreden bent u over de enkelklachten? | <input type="radio"/> Slecht<br><input type="radio"/> Matig<br><input type="radio"/> Goed<br><input type="radio"/> Uitstekend |

## Vragenlijst PRIMA studie 5 jaar - SF-36

| Number | Question                                                                                                                                                                                                                                                                                                                                                           | Answers                                                                                                                                                                                                                                                                                      |
|--------|--------------------------------------------------------------------------------------------------------------------------------------------------------------------------------------------------------------------------------------------------------------------------------------------------------------------------------------------------------------------|----------------------------------------------------------------------------------------------------------------------------------------------------------------------------------------------------------------------------------------------------------------------------------------------|
|        | Deze vragenlijst gaat over uw standpunten t.a.v. uw gezondheid. Met behulp van deze gegevens kan worden bijgehouden hoe u zich voelt en hoe goed u in staat bent uw gebruikelijke bezigheden uit te voeren. Beantwoord elke vraag door een antwoord aan te klikken. Als u niet zeker weet hoe u een vraag moet beantwoorden, geef dan het best mogelijke antwoord. |                                                                                                                                                                                                                                                                                              |
| 6.1    | Hoe zou u over het algemeen uw gezondheid noemen?                                                                                                                                                                                                                                                                                                                  | <input type="radio"/> Uitstekend <input type="radio"/> Zeer goed <input type="radio"/> Goed <input type="radio"/> Matig <input type="radio"/> Slecht                                                                                                                                         |
| 6.2    | Hoe beoordeelt u nu uw gezondheid over het algemeen vergeleken met een jaar geleden?                                                                                                                                                                                                                                                                               | <input type="radio"/> Veel beter dan een jaar geleden <input type="radio"/> Wat beter dan een jaar geleden <input type="radio"/> Ongeveer hetzelfde als een jaar geleden<br><input type="radio"/> Wat slechter dan een jaar geleden <input type="radio"/> Veel slechter dan een jaar geleden |
| 6.3    | Wordt u door uw gezondheid op dit moment beperkt bij forse inspanning, zoals hardlopen, tillen van zware voorwerpen of een veeleisende sport beoefenen?                                                                                                                                                                                                            | <input type="radio"/> Ja, ernstig beperkt <input type="radio"/> Ja, een beetje beperkt <input type="radio"/> Nee, helemaal niet beperkt                                                                                                                                                      |
| 6.4    | Wordt u door uw gezondheid op dit moment beperkt bij matige inspanning zoals een tafel verplaatsen, stofzuigen, zwemmen of fietsen?                                                                                                                                                                                                                                | <input type="radio"/> Ja, ernstig beperkt <input type="radio"/> Ja, een beetje beperkt <input type="radio"/> Nee, helemaal niet beperkt                                                                                                                                                      |
| 6.5    | Wordt u door uw gezondheid op dit moment beperkt bij boodschappen tillen of dragen?                                                                                                                                                                                                                                                                                | <input type="radio"/> Ja, ernstig beperkt <input type="radio"/> Ja, een beetje beperkt <input type="radio"/> Nee, helemaal niet beperkt                                                                                                                                                      |
| 6.6    | Wordt u door uw gezondheid op dit moment beperkt bij een paar trappen oplopen?                                                                                                                                                                                                                                                                                     | <input type="radio"/> Ja, ernstig beperkt <input type="radio"/> Ja, een beetje beperkt <input type="radio"/> Nee, helemaal niet beperkt                                                                                                                                                      |
| 6.7    | Wordt u door uw gezondheid op dit moment beperkt bij één trap oplopen?                                                                                                                                                                                                                                                                                             | <input type="radio"/> Ja, ernstig beperkt <input type="radio"/> Ja, een beetje beperkt <input type="radio"/> Nee, helemaal niet beperkt                                                                                                                                                      |
| 6.8    | Wordt u door uw gezondheid op dit moment beperkt bij bukken, knielen of hurken?                                                                                                                                                                                                                                                                                    | <input type="radio"/> Ja, ernstig beperkt <input type="radio"/> Ja, een beetje beperkt <input type="radio"/> Nee, helemaal niet beperkt                                                                                                                                                      |
| 6.9    | Wordt u door uw gezondheid op dit moment beperkt bij meer dan één kilometer lopen?                                                                                                                                                                                                                                                                                 | <input type="radio"/> Ja, ernstig beperkt <input type="radio"/> Ja, een beetje beperkt <input type="radio"/> Nee, helemaal niet beperkt                                                                                                                                                      |
| 6.10   | Wordt u door uw gezondheid op dit moment beperkt bij een paar honderd meter lopen?                                                                                                                                                                                                                                                                                 | <input type="radio"/> Ja, ernstig beperkt <input type="radio"/> Ja, een beetje beperkt <input type="radio"/> Nee, helemaal niet beperkt                                                                                                                                                      |

1  
2  
3  
4  
5  
6  
7  
8  
9  
10  
11  
12  
13  
14  
15  
16  
17  
18  
19  
20  
21  
22  
23  
24  
25  
26  
27  
28  
29  
30  
31  
32  
33  
34  
35  
36  
37  
38  
39  
40  
41  
42  
43  
44  
45  
46  
47  
48  
49  
50  
51  
52  
53  
54  
55  
56  
57  
58  
59  
60

|      |                                                                                                                                                                                                              |                                           |                                              |                                                  |                             |                                     |                                    |
|------|--------------------------------------------------------------------------------------------------------------------------------------------------------------------------------------------------------------|-------------------------------------------|----------------------------------------------|--------------------------------------------------|-----------------------------|-------------------------------------|------------------------------------|
| 6.11 | Wordt u door uw gezondheid op dit moment beperkt bij ongeveer honderd meter lopen?                                                                                                                           | <input type="radio"/> Ja, ernstig beperkt | <input type="radio"/> Ja, een beetje beperkt | <input type="radio"/> Nee, helemaal niet beperkt |                             |                                     |                                    |
| 6.12 | Wordt u door uw gezondheid op dit moment beperkt bij uzelf wassen of aankleden?                                                                                                                              | <input type="radio"/> Ja, ernstig beperkt | <input type="radio"/> Ja, een beetje beperkt | <input type="radio"/> Nee, helemaal niet beperkt |                             |                                     |                                    |
| 6.13 | U besteedde in de afgelopen 4 weken minder tijd aan werk of andere bezigheden                                                                                                                                | <input type="radio"/> Ja                  | <input type="radio"/> Nee                    |                                                  |                             |                                     |                                    |
| 6.14 | U heeft in de afgelopen 4 weken minder bereikt dan u zou willen                                                                                                                                              | <input type="radio"/> Ja                  | <input type="radio"/> Nee                    |                                                  |                             |                                     |                                    |
| 6.15 | U was in de afgelopen 4 weken beperkt in het soort werk of andere bezigheden.                                                                                                                                | <input type="radio"/> Ja                  | <input type="radio"/> Nee                    |                                                  |                             |                                     |                                    |
| 6.16 | U had de afgelopen 4 weken moeite om uw werk of andere bezigheden uit te voeren (het kostte u bijvoorbeeld extra inspanning).                                                                                | <input type="radio"/> Ja                  | <input type="radio"/> Nee                    |                                                  |                             |                                     |                                    |
| 6.17 | U besteedde in de afgelopen 4 weken minder tijd aan werk of andere bezigheden ten gevolge van emotionele problemen                                                                                           | <input type="radio"/> Ja                  | <input type="radio"/> Nee                    |                                                  |                             |                                     |                                    |
| 6.18 | U heeft in de afgelopen 4 weken minder bereikt dan u zou willen ten gevolge van emotionele problemen.                                                                                                        | <input type="radio"/> Ja                  | <input type="radio"/> Nee                    |                                                  |                             |                                     |                                    |
| 6.19 | U deed de afgelopen 4 weken uw werk of andere bezigheden niet zo zorgvuldig als gewoonlijk ten gevolge van emotionele problemen.                                                                             | <input type="radio"/> Ja                  | <input type="radio"/> Nee                    |                                                  |                             |                                     |                                    |
| 6.20 | In hoeverre hebben uw lichamelijke gezondheid of emotionele problemen u gedurende de afgelopen 4 weken gehinderd in uw normale omgang met familie, vrienden of burens, of bij activiteiten in groepsverband? | <input type="radio"/> Helemaal niet       | <input type="radio"/> Enigszins              | <input type="radio"/> Nogal                      | <input type="radio"/> Veel  | <input type="radio"/> Heel erg veel |                                    |
| 6.21 | Hoeveel lichamelijke pijn heeft u de afgelopen 4 weken gehad?                                                                                                                                                | <input type="radio"/> Geen                | <input type="radio"/> Heel licht             | <input type="radio"/> Licht                      | <input type="radio"/> Nogal | <input type="radio"/> Ernstig       | <input type="radio"/> Heel ernstig |
| 6.22 | In welke mate bent u de afgelopen 4 weken door de pijn gehinderd in uw normale werk (zowel werk buitenshuis als huishoudelijk werk)?                                                                         | <input type="radio"/> Helemaal niet       | <input type="radio"/> Een klein beetje       | <input type="radio"/> Nogal                      | <input type="radio"/> Veel  | <input type="radio"/> Heel erg veel |                                    |

1  
2 6.23 Voelde u zich levenslustig?  Altijd  
3  Meestal  
4  Vaak  
5  Soms  
6  Zelden  
7  Nooit

11 6.24 Was u erg zenuwachtig?  Altijd  
12  Meestal  
13  Vaak  
14  Soms  
15  Zelden  
16  Nooit

21 6.25 Zat u zo in de put dat u niets kon?  Altijd  
22  Meestal  
23  Vaak  
24  Soms  
25  Zelden  
26  Nooit

31 6.26 Voelde u zich rustig en tevreden?  Altijd  
32  Meestal  
33  Vaak  
34  Soms  
35  Zelden  
36  Nooit

41 6.27 Had u veel energie?  Altijd  
42  Meestal  
43  Vaak  
44  Soms  
45  Zelden  
46  Nooit

51 6.28 Voelde u zich somber en neerslachtig?  Altijd  
52  Meestal  
53  Vaak  
54  Soms  
55  Zelden  
56  Nooit

- 1  
2  
3  
4  
5  
6  
7  
8  
9  
10  
11  
12 6.29 Voelde u zich uitgeput?  Altijd  
13  Meestal  
14  Vaak  
15  Soms  
16  Zelden  
17  Nooit  
18  
19  
20  
21  
22 6.30 Was u een gelukkig mens?  Altijd  
23  Meestal  
24  Vaak  
25  Soms  
26  Zelden  
27  Nooit  
28  
29  
30  
31 6.31 Voelde u zich moe?  Altijd  
32  Meestal  
33  Vaak  
34  Soms  
35  Zelden  
36  Nooit  
37  
38  
39 6.32 Hoe vaak hebben uw lichamelijke gezondheid of  
40 emotionele problemen u gedurende de afgelopen 4  
41 weken gehinderd bij uw sociale activiteiten (zoals  
42 vrienden of familie bezoeken etc.)?  Altijd  
43  Meestal  
44  Soms  
45  Zelden  
46  Nooit  
47  
48 6.33 Ik lijk wat gemakkelijker ziek te worden dan andere  
49 mensen  Volkomen juist  
50  Grotendeels juist  
51  Weet ik niet  
52  Grotendeels onjuist  
53  Volkomen onjuist  
54  
55 6.34 Ik ben even gezond als andere mensen die ik ken  Volkomen juist  
56  Grotendeels juist  
57  Weet ik niet  
58  Grotendeels onjuist  
59  Volkomen onjuist  
60

- 1  
2  
3  
4  
5  
6  
7  
8  
9
- 
- 6.35 Ik verwacht dat mijn gezondheid achteruit zal gaan
- Volkomen juist
  - Grotendeels juist
  - Weet ik niet
  - Grotendeels onjuist
  - Volkomen onjuist
- 

- 10  
11  
12  
13  
14  
15  
16  
17  
18  
19  
20  
21  
22
- 6.36 Mijn gezondheid is uitstekend
- Volkomen juist
  - Grotendeels juist
  - Weet ik niet
  - Grotendeels onjuist
  - Volkomen onjuist

## Vragenlijst PRIMA studie 5 jaar - GAS

| Number | Question                                                                                                                                                                                  | Answers                                                                                                                                                                                                                                                                                                                                                              |
|--------|-------------------------------------------------------------------------------------------------------------------------------------------------------------------------------------------|----------------------------------------------------------------------------------------------------------------------------------------------------------------------------------------------------------------------------------------------------------------------------------------------------------------------------------------------------------------------|
|        | Tijdens de eerste afspraak werd een duidelijk doel met u afgesproken. Dit werd tevens per email naar u gestuurd. Hoe is de situatie nu ten aanzien van de destijds gestelde doelstelling? |                                                                                                                                                                                                                                                                                                                                                                      |
| 7.1    | Wat is nu de situatie ten aanzien van het tijdens de eerste afspraak afgesproken doelstelling (Goal attainment Scaling)?                                                                  | <ul style="list-style-type: none"> <li><input type="radio"/> Achteruitgang (minder dan de uitgangssituatie)</li> <li><input type="radio"/> Uitgangssituatie</li> <li><input type="radio"/> Minder dan het doel</li> <li><input type="radio"/> Doel</li> <li><input type="radio"/> Meer dan het doel</li> <li><input type="radio"/> Veel meer dan het doel</li> </ul> |

## Vragenlijst PRIMA studie 5 jaar - EQ-5D-3L

| Number | Question                                                                                                                                                                                                                                                                                                                                                           | Answers                                                                                                                                                                                                                  |
|--------|--------------------------------------------------------------------------------------------------------------------------------------------------------------------------------------------------------------------------------------------------------------------------------------------------------------------------------------------------------------------|--------------------------------------------------------------------------------------------------------------------------------------------------------------------------------------------------------------------------|
|        | Deze vragenlijst gaat over uw standpunten t.a.v. uw gezondheid. Met behulp van deze gegevens kan worden bijgehouden hoe u zich voelt en hoe goed u in staat bent uw gebruikelijke bezigheden uit te voeren. Beantwoord elke vraag door een antwoord aan te klikken. Als u niet zeker weet hoe u een vraag moet beantwoorden, geef dan het best mogelijke antwoord. |                                                                                                                                                                                                                          |
| 8.1    | Hoe is het met uw Mobiliteit gesteld?                                                                                                                                                                                                                                                                                                                              | <ul style="list-style-type: none"> <li><input type="radio"/> Ik heb geen problemen met lopen</li> <li><input type="radio"/> Ik heb enige problemen met lopen</li> <li><input type="radio"/> Ik ben bedlegerig</li> </ul> |



|                                                                                                                                                                                                                                     |                                                                                                                  |                                                                                                                                                                                                                                                             |
|-------------------------------------------------------------------------------------------------------------------------------------------------------------------------------------------------------------------------------------|------------------------------------------------------------------------------------------------------------------|-------------------------------------------------------------------------------------------------------------------------------------------------------------------------------------------------------------------------------------------------------------|
| 8.2                                                                                                                                                                                                                                 | Hoe is het met uw Zelfzorg gesteld?                                                                              | <input type="radio"/> Ik heb geen problemen om mijzelf te wassen of aan te kleden<br><input type="radio"/> Ik heb enige problemen om mijzelf te wassen of aan te kleden<br><input type="radio"/> Ik ben niet in staat om mijzelf te wassen of aan te kleden |
| 8.3                                                                                                                                                                                                                                 | Hoe is het met de Dagelijkse activiteiten (werk, studie, huishouden, gezins- en vrijetijdsactiviteiten) gesteld? | <input type="radio"/> Ik heb geen problemen met mijn dagelijkse activiteiten<br><input type="radio"/> Ik heb enige problemen met mijn dagelijkse activiteiten<br><input type="radio"/> Ik ben niet in staat om mijn dagelijkse activiteiten uit te voeren   |
| 8.4                                                                                                                                                                                                                                 | Hoe is het met de Pijn/klachten gesteld?                                                                         | <input type="radio"/> Ik heb geen pijn of andere klachten<br><input type="radio"/> Ik heb matige pijn of andere klachten<br><input type="radio"/> Ik heb zeer ernstige pijn of andere klachten                                                              |
| 8.5                                                                                                                                                                                                                                 | Hoe is het met de Stemming gesteld?                                                                              | <input type="radio"/> Ik ben niet angstig of somber<br><input type="radio"/> Ik ben matig angstig of somber<br><input type="radio"/> Ik ben erg angstig of somber                                                                                           |
| We willen weten hoe goed of slecht uw gezondheid VANDAAG is. Deze meetschaal loopt van 0 tot 100: 100 staat voor de BESTE gezondheid die u zich kunt voorstellen - 0 staat voor de SLECHTSTE gezondheid die u zich kunt voorstellen |                                                                                                                  |                                                                                                                                                                                                                                                             |
| 8.6                                                                                                                                                                                                                                 | Uw Gezondheid vandaag                                                                                            | (0.00) (100.00)                                                                                                                                                                                                                                             |

## Vragenlijst PRIMA studie 5 jaar - AOS

| Number                                                                                                                                                                                                                                                                                                                                                                                                               | Question                                                   | Answers                                                                                            |
|----------------------------------------------------------------------------------------------------------------------------------------------------------------------------------------------------------------------------------------------------------------------------------------------------------------------------------------------------------------------------------------------------------------------|------------------------------------------------------------|----------------------------------------------------------------------------------------------------|
| <p>Instructies: De lijn naast elke vraag staat voor hoeveel PIJN u heeft in verschillende situaties. De linker kant (0) is "geen pijn" en de rechter kant (100) is "ergste pijn denkbaar". Geef voor de onderstaande situaties op de lijn aan hoeveel PIJN u in de afgelopen week in de enkel had. Als een of meerdere van deze situaties niet van toepassing waren, dan kiest u de "niet van toepassing" optie.</p> |                                                            |                                                                                                    |
| 9.1                                                                                                                                                                                                                                                                                                                                                                                                                  | Wat was de hoogte van de ergste pijn in de afgelopen week? | (0.00) (100.00)                                                                                    |
| 9.2                                                                                                                                                                                                                                                                                                                                                                                                                  | Heeft u pijn als u 's ochtends opstaat?                    | <input type="radio"/> Ja<br><input type="radio"/> Nee<br><input type="radio"/> Niet van toepassing |

|    |       |                                                                                                                     |                                           |
|----|-------|---------------------------------------------------------------------------------------------------------------------|-------------------------------------------|
| 1  |       |                                                                                                                     |                                           |
| 2  | 9.2.1 | <b><i>If 'Heeft u pijn als u 's ochtends opstaat?' is equal to 'Ja' answer this question:</i></b>                   | (0.00) (100.00)                           |
| 3  |       |                                                                                                                     |                                           |
| 4  |       | Hoeveel pijn heeft u voordat u 's ochtends opstaat?                                                                 |                                           |
| 5  |       |                                                                                                                     |                                           |
| 6  | 9.3   | Heeft u pijn wanneer u op blote voeten loopt?                                                                       | <input type="radio"/> Ja                  |
| 7  |       |                                                                                                                     | <input type="radio"/> Nee                 |
| 8  |       |                                                                                                                     | <input type="radio"/> Niet van toepassing |
| 9  |       |                                                                                                                     |                                           |
| 10 |       |                                                                                                                     |                                           |
| 11 |       |                                                                                                                     |                                           |
| 12 | 9.3.1 | <b><i>If 'Heeft u pijn wanneer u op blote voeten loopt?' is equal to 'Ja' answer this question:</i></b>             | (0.00) (100.00)                           |
| 13 |       |                                                                                                                     |                                           |
| 14 |       | Hoeveel pijn heeft u als u op blote voeten loopt?                                                                   |                                           |
| 15 |       |                                                                                                                     |                                           |
| 16 | 9.4   | Heeft u pijn wanneer u op blote voeten staat?                                                                       | <input type="radio"/> Ja                  |
| 17 |       |                                                                                                                     | <input type="radio"/> Nee                 |
| 18 |       |                                                                                                                     | <input type="radio"/> Niet van toepassing |
| 19 |       |                                                                                                                     |                                           |
| 20 |       |                                                                                                                     |                                           |
| 21 |       |                                                                                                                     |                                           |
| 22 | 9.4.1 | <b><i>If 'Heeft u pijn wanneer u op blote voeten staat?' is equal to 'Ja' answer this question:</i></b>             | (0.00) (100.00)                           |
| 23 |       |                                                                                                                     |                                           |
| 24 |       | Hoeveel pijn heeft u als u op blote voeten staat?                                                                   |                                           |
| 25 |       |                                                                                                                     |                                           |
| 26 | 9.5   | Heeft u pijn wanneer u met schoenen loopt?                                                                          | <input type="radio"/> Ja                  |
| 27 |       |                                                                                                                     | <input type="radio"/> Nee                 |
| 28 |       |                                                                                                                     | <input type="radio"/> Niet van toepassing |
| 29 |       |                                                                                                                     |                                           |
| 30 |       |                                                                                                                     |                                           |
| 31 |       |                                                                                                                     |                                           |
| 32 | 9.5.1 | <b><i>If 'Heeft u pijn wanneer u met schoenen loopt?' is equal to 'Ja' answer this question:</i></b>                | (0.00) (100.00)                           |
| 33 |       |                                                                                                                     |                                           |
| 34 |       | Hoeveel pijn heeft u wanneer u met schoenen loopt?                                                                  |                                           |
| 35 |       |                                                                                                                     |                                           |
| 36 | 9.6   | Heeft u pijn wanneer u met schoenen staat?                                                                          | <input type="radio"/> Ja                  |
| 37 |       |                                                                                                                     | <input type="radio"/> Nee                 |
| 38 |       |                                                                                                                     | <input type="radio"/> Niet van toepassing |
| 39 |       |                                                                                                                     |                                           |
| 40 |       |                                                                                                                     |                                           |
| 41 |       |                                                                                                                     |                                           |
| 42 | 9.6.1 | <b><i>If 'Heeft u pijn wanneer u met schoenen staat?' is equal to 'Ja' answer this question:</i></b>                | (0.00) (100.00)                           |
| 43 |       |                                                                                                                     |                                           |
| 44 |       | Hoeveel pijn heeft u wanneer u met schoenen staat?                                                                  |                                           |
| 45 |       |                                                                                                                     |                                           |
| 46 | 9.7   | Heeft u pijn wanneer u loopt met steunzolen of een brace?                                                           | <input type="radio"/> Ja                  |
| 47 |       |                                                                                                                     | <input type="radio"/> Nee                 |
| 48 |       |                                                                                                                     | <input type="radio"/> Niet van toepassing |
| 49 |       |                                                                                                                     |                                           |
| 50 |       |                                                                                                                     |                                           |
| 51 |       |                                                                                                                     |                                           |
| 52 | 9.7.1 | <b><i>If 'Heeft u pijn wanneer u loopt met steunzolen of een brace?' is equal to 'Ja' answer this question:</i></b> | (0.00) (100.00)                           |
| 53 |       |                                                                                                                     |                                           |
| 54 |       | Hoeveel pijn heeft u wanneer u loopt met steunzolen of een brace?                                                   |                                           |
| 55 |       |                                                                                                                     |                                           |
| 56 |       |                                                                                                                     |                                           |
| 57 |       |                                                                                                                     |                                           |
| 58 |       |                                                                                                                     |                                           |
| 59 |       |                                                                                                                     |                                           |
| 60 |       |                                                                                                                     |                                           |

|    |        |                                                                                                              |                                           |          |
|----|--------|--------------------------------------------------------------------------------------------------------------|-------------------------------------------|----------|
| 1  |        |                                                                                                              |                                           |          |
| 2  | 9.8    | Heeft u pijn wanneer u staat met steunzolen of een brace?                                                    | <input type="radio"/> Ja                  |          |
| 3  |        |                                                                                                              | <input type="radio"/> Nee                 |          |
| 4  |        |                                                                                                              | <input type="radio"/> Niet van toepassing |          |
| 5  |        |                                                                                                              |                                           |          |
| 6  |        |                                                                                                              |                                           |          |
| 7  |        |                                                                                                              |                                           |          |
| 8  | 9.8.1  | <b>If 'Heeft u pijn wanneer u staat met steunzolen of een brace?' is equal to 'Ja' answer this question:</b> | (0.00)                                    | (100.00) |
| 9  |        | Hoeveel pijn heeft u wanneer u staat met steunzolen of een brace?                                            |                                           |          |
| 10 |        |                                                                                                              |                                           |          |
| 11 |        |                                                                                                              |                                           |          |
| 12 |        |                                                                                                              |                                           |          |
| 13 | 9.9    | Heeft u pijn aan het einde van de dag?                                                                       | <input type="radio"/> Ja                  |          |
| 14 |        |                                                                                                              | <input type="radio"/> Nee                 |          |
| 15 |        |                                                                                                              | <input type="radio"/> Niet van toepassing |          |
| 16 |        |                                                                                                              |                                           |          |
| 17 |        |                                                                                                              |                                           |          |
| 18 |        |                                                                                                              |                                           |          |
| 19 | 9.9.1  | <b>If 'Heeft u pijn aan het einde van de dag?' is equal to 'Ja' answer this question:</b>                    | (0.00)                                    | (100.00) |
| 20 |        | Hoeveel pijn heeft u aan het einde van de dag?                                                               |                                           |          |
| 21 |        |                                                                                                              |                                           |          |
| 22 |        |                                                                                                              |                                           |          |
| 23 |        | Instructies:De lijn naast elke vraag staat voor hoeveel MOEITE u heeft met verschillende activiteiten.       |                                           |          |
| 24 |        | De linker kant (0) is "Niet moeilijk" en de rechter kant (100) is "Te moeilijk, niet uitvoerbaar". Geef voor |                                           |          |
| 25 |        | de onderstaande activiteiten op de lijn aan hoeveel MOEITE u in de afgelopen week door                       |                                           |          |
| 26 |        | enkelklachten had met onderstaande activiteiten. Als een situatie niet van toepassing is, kies dan de        |                                           |          |
| 27 |        | optie "niet van toepassing".                                                                                 |                                           |          |
| 28 |        |                                                                                                              |                                           |          |
| 29 |        |                                                                                                              |                                           |          |
| 30 | 9.10   | Heeft u moeite met door het huis lopen?                                                                      | <input type="radio"/> Ja                  |          |
| 31 |        |                                                                                                              | <input type="radio"/> Nee                 |          |
| 32 |        |                                                                                                              | <input type="radio"/> Niet van toepassing |          |
| 33 |        |                                                                                                              |                                           |          |
| 34 |        |                                                                                                              |                                           |          |
| 35 | 9.10.1 | <b>If 'Heeft u moeite met door het huis lopen?' is equal to 'Ja' answer this question:</b>                   | (0.00)                                    | (100.00) |
| 36 |        | Hoeveel moeite heeft u met door het huis lopen?                                                              |                                           |          |
| 37 |        |                                                                                                              |                                           |          |
| 38 |        |                                                                                                              |                                           |          |
| 39 |        |                                                                                                              |                                           |          |
| 40 | 9.11   | Heeft u moeite met buiten lopen op oneven ondergrond?                                                        | <input type="radio"/> Ja                  |          |
| 41 |        |                                                                                                              | <input type="radio"/> Nee                 |          |
| 42 |        |                                                                                                              | <input type="radio"/> Niet van toepassing |          |
| 43 |        |                                                                                                              |                                           |          |
| 44 |        |                                                                                                              |                                           |          |
| 45 | 9.11.1 | <b>If 'Heeft u moeite met buiten lopen op oneven ondergrond?' is equal to 'Ja' answer this question:</b>     | (0.00)                                    | (100.00) |
| 46 |        | Hoeveel moeite heeft u met buiten lopen op oneven ondergrond?                                                |                                           |          |
| 47 |        |                                                                                                              |                                           |          |
| 48 |        |                                                                                                              |                                           |          |
| 49 |        |                                                                                                              |                                           |          |
| 50 |        |                                                                                                              |                                           |          |
| 51 | 9.12   | Heeft u moeite met een paar honderd meter lopen?                                                             | <input type="radio"/> Ja                  |          |
| 52 |        |                                                                                                              | <input type="radio"/> Nee                 |          |
| 53 |        |                                                                                                              | <input type="radio"/> Niet van toepassing |          |
| 54 |        |                                                                                                              |                                           |          |
| 55 |        |                                                                                                              |                                           |          |
| 56 | 9.12.1 | <b>If 'Heeft u moeite met een paar honderd meter lopen?' is equal to 'Ja' answer this question:</b>          | (0.00)                                    | (100.00) |
| 57 |        | Hoeveel moeite heeft u met een paar honderd meter lopen?                                                     |                                           |          |
| 58 |        |                                                                                                              |                                           |          |
| 59 |        |                                                                                                              |                                           |          |
| 60 |        |                                                                                                              |                                           |          |

|    |        |                                                                                                             |                                           |          |
|----|--------|-------------------------------------------------------------------------------------------------------------|-------------------------------------------|----------|
| 1  |        |                                                                                                             |                                           |          |
| 2  | 9.13   | Heeft u moeite met een trap oplopen?                                                                        | <input type="radio"/> Ja                  |          |
| 3  |        |                                                                                                             | <input type="radio"/> Nee                 |          |
| 4  |        |                                                                                                             | <input type="radio"/> Niet van toepassing |          |
| 5  |        |                                                                                                             |                                           |          |
| 6  |        |                                                                                                             |                                           |          |
| 7  |        |                                                                                                             |                                           |          |
| 8  | 9.13.1 | <b>If 'Heeft u moeite met een trap oplopen?' is equal to 'Ja' answer this question:</b>                     | (0.00)                                    | (100.00) |
| 9  |        | Hoeveel moeite heeft u met een trap oplopen?                                                                |                                           |          |
| 10 |        |                                                                                                             |                                           |          |
| 11 |        |                                                                                                             |                                           |          |
| 12 | 9.14   | Heeft u moeite met een trap aflopen?                                                                        | <input type="radio"/> Ja                  |          |
| 13 |        |                                                                                                             | <input type="radio"/> Nee                 |          |
| 14 |        |                                                                                                             | <input type="radio"/> Niet van toepassing |          |
| 15 |        |                                                                                                             |                                           |          |
| 16 |        |                                                                                                             |                                           |          |
| 17 |        |                                                                                                             |                                           |          |
| 18 | 9.14.1 | <b>If 'Heeft u moeite met een trap aflopen?' is equal to 'Ja' answer this question:</b>                     | (0.00)                                    | (100.00) |
| 19 |        | Hoeveel moeite heeft u met een trap aflopen?                                                                |                                           |          |
| 20 |        |                                                                                                             |                                           |          |
| 21 |        |                                                                                                             |                                           |          |
| 22 | 9.15   | Heeft u moeite met op de tenen staan?                                                                       | <input type="radio"/> Ja                  |          |
| 23 |        |                                                                                                             | <input type="radio"/> Nee                 |          |
| 24 |        |                                                                                                             | <input type="radio"/> Niet van toepassing |          |
| 25 |        |                                                                                                             |                                           |          |
| 26 |        |                                                                                                             |                                           |          |
| 27 |        |                                                                                                             |                                           |          |
| 28 | 9.15.1 | <b>If 'Heeft u moeite met op de tenen staan?' is equal to 'Ja' answer this question:</b>                    | (0.00)                                    | (100.00) |
| 29 |        | Hoeveel moeite heeft u met op de tenen staan?                                                               |                                           |          |
| 30 |        |                                                                                                             |                                           |          |
| 31 |        |                                                                                                             |                                           |          |
| 32 | 9.16   | Heeft u moeite met opstaan uit de stoel?                                                                    | <input type="radio"/> Ja                  |          |
| 33 |        |                                                                                                             | <input type="radio"/> Nee                 |          |
| 34 |        |                                                                                                             | <input type="radio"/> Niet van toepassing |          |
| 35 |        |                                                                                                             |                                           |          |
| 36 |        |                                                                                                             |                                           |          |
| 37 |        |                                                                                                             |                                           |          |
| 38 | 9.16.1 | <b>If 'Heeft u moeite met opstaan uit de stoel?' is equal to 'Ja' answer this question:</b>                 | (0.00)                                    | (100.00) |
| 39 |        | Hoeveel moeite heeft u met opstaan uit de stoel?                                                            |                                           |          |
| 40 |        |                                                                                                             |                                           |          |
| 41 |        |                                                                                                             |                                           |          |
| 42 | 9.17   | Heeft u moeite met het op- of afstappen van stoepranden?                                                    | <input type="radio"/> Ja                  |          |
| 43 |        |                                                                                                             | <input type="radio"/> Nee                 |          |
| 44 |        |                                                                                                             | <input type="radio"/> Niet van toepassing |          |
| 45 |        |                                                                                                             |                                           |          |
| 46 |        |                                                                                                             |                                           |          |
| 47 |        |                                                                                                             |                                           |          |
| 48 | 9.17.1 | <b>If 'Heeft u moeite met het op- of afstappen van stoepranden?' is equal to 'Ja' answer this question:</b> | (0.00)                                    | (100.00) |
| 49 |        | Hoeveel moeite heeft u met het op- of afstappen van stoepranden?                                            |                                           |          |
| 50 |        |                                                                                                             |                                           |          |
| 51 |        |                                                                                                             |                                           |          |
| 52 |        |                                                                                                             |                                           |          |
| 53 |        |                                                                                                             |                                           |          |
| 54 | 9.18   | Heeft u moeite met snel lopen of rennen?                                                                    | <input type="radio"/> Ja                  |          |
| 55 |        |                                                                                                             | <input type="radio"/> Nee                 |          |
| 56 |        |                                                                                                             | <input type="radio"/> Niet van toepassing |          |
| 57 |        |                                                                                                             |                                           |          |
| 58 |        |                                                                                                             |                                           |          |
| 59 |        |                                                                                                             |                                           |          |
| 60 |        |                                                                                                             |                                           |          |

9.18.1 ***If 'Heeft u moeite met snel lopen of rennen?' is equal to 'Ja' answer this question:*** (0.00) (100.00)  
 Hoeveel moeite heeft u met snel lopen of rennen?

## Vragenlijst PRIMA studie 5 jaar - FAOS

| Number | Question                                                                                                                                                                                                                                                                                                                                                                                                                                                                                                                                                                            | Answers                                                                                                                                                    |
|--------|-------------------------------------------------------------------------------------------------------------------------------------------------------------------------------------------------------------------------------------------------------------------------------------------------------------------------------------------------------------------------------------------------------------------------------------------------------------------------------------------------------------------------------------------------------------------------------------|------------------------------------------------------------------------------------------------------------------------------------------------------------|
|        | Deze lijst vraagt naar uw mening over uw voet/enkel. Uw antwoorden geven ons een beeld van uw voet/enkel klachten en hoe u in staat bent om alledaagse activiteiten uit te voeren in uw huidige situatie. Beantwoorden van een vraag doet u door het aanklikken van een vakje met het volgens u meest juiste antwoord (één vakje per vraag). Als u niet zeker weet hoe u een vraag moet beantwoorden, geeft u dan het antwoord dat volgens u het meest op uw situatie van toepassing is. Deze vraag heeft betrekking op het voorkomen van voet/enkel klachten in de afgelopen week. |                                                                                                                                                            |
| 10.1   | Is uw voet/enkel gezwollen?                                                                                                                                                                                                                                                                                                                                                                                                                                                                                                                                                         | <input type="radio"/> Nooit <input type="radio"/> Zelden <input type="radio"/> Soms <input type="radio"/> Vaak <input type="radio"/> Altijd                |
| 10.2   | Voelt u gekraak of hoort u klikken of een ander vreemd geluid wanneer u de voet/enkel beweegt?                                                                                                                                                                                                                                                                                                                                                                                                                                                                                      | <input type="radio"/> Nooit <input type="radio"/> Zelden <input type="radio"/> Soms <input type="radio"/> Vaak <input type="radio"/> Altijd                |
| 10.3   | Hapert uw enkel of blokkeert uw enkel ('op slot' gaan zitten) wanneer u deze beweegt?                                                                                                                                                                                                                                                                                                                                                                                                                                                                                               | <input type="radio"/> Nooit <input type="radio"/> Zelden <input type="radio"/> Soms <input type="radio"/> Vaak <input type="radio"/> Altijd                |
| 10.4   | Kunt u de voet/enkel volledig strekken?                                                                                                                                                                                                                                                                                                                                                                                                                                                                                                                                             | <input type="radio"/> Altijd <input type="radio"/> Vaak <input type="radio"/> Soms <input type="radio"/> Zelden <input type="radio"/> Nooit                |
| 10.5   | Kunt u de voet volledig naar u toe buigen?                                                                                                                                                                                                                                                                                                                                                                                                                                                                                                                                          | <input type="radio"/> Altijd <input type="radio"/> Vaak <input type="radio"/> Soms <input type="radio"/> Zelden <input type="radio"/> Nooit                |
| 10.6   | In welke mate heeft u een stijf gevoel in de voet/enkel 's ochtends bij het wakker worden?                                                                                                                                                                                                                                                                                                                                                                                                                                                                                          | <input type="radio"/> Niet Ernstig <input type="radio"/> Mild <input type="radio"/> Matig <input type="radio"/> Zeer ernstig                               |
| 10.7   | In welke mate heeft u een stijf gevoel in de voet/enkel na zitten, liggen of rusten later op de dag?                                                                                                                                                                                                                                                                                                                                                                                                                                                                                | <input type="radio"/> Niet Ernstig <input type="radio"/> Mild <input type="radio"/> Matig <input type="radio"/> Zeer ernstig                               |
| 10.8   | Hoe vaak heeft u pijn in uw voet/enkel?                                                                                                                                                                                                                                                                                                                                                                                                                                                                                                                                             | <input type="radio"/> Nooit <input type="radio"/> Maandelijks <input type="radio"/> Wekelijks <input type="radio"/> Dagelijks <input type="radio"/> Altijd |

1  
2  
3  
4  
5  
6  
7  
8  
9

---

10.9 Hoeveel voet/enkel pijn heeft u gehad in de afgelopen week bij draaien als uw voet/enkel op de grond staat?

Geen  
 Mild  
 Matig  
 Ernstig  
 Zeer ernstig

---

10  
11  
12  
13  
14  
15  
16  
17  
18

---

10.10 Hoeveel voet/enkel pijn heeft u gehad in de afgelopen week bij het volledig uitstrekken van de voet/enkel?

Geen  
 Mild  
 Matig  
 Ernstig  
 Zeer ernstig

---

19  
20  
21  
22  
23  
24  
25  
26

---

10.11 Hoeveel voet/enkel pijn heeft u gehad in de afgelopen week bij het volledig naar u toe buigen/optrekken van de voet/enkel

Geen  
 Mild  
 Matig  
 Ernstig  
 Zeer ernstig

---

27  
28  
29  
30  
31  
32  
33  
34

---

10.12 Hoeveel voet/enkel pijn heeft u gehad in de afgelopen week bij het lopen op een vlakke ondergrond

Geen  
 Mild  
 Matig  
 Ernstig  
 Zeer ernstig

---

35  
36  
37  
38  
39  
40  
41  
42  
43

---

10.13 Hoeveel voet/enkel pijn heeft u gehad in de afgelopen week bij het trap op- en trap af lopen?

Geen  
 Mild  
 Matig  
 Ernstig  
 Zeer ernstig

---

44  
45  
46  
47  
48  
49  
50  
51

---

10.14 Hoeveel voet/enkel pijn heeft u gehad in de afgelopen week 's nachts in bed?

Geen  
 Mild  
 Matig  
 Ernstig  
 Zeer ernstig

---

52  
53  
54  
55  
56  
57  
58  
59  
60

---

10.15 Hoeveel voet/enkel pijn heeft u gehad in de afgelopen week bij het zitten of liggen?

Geen  
 Mild  
 Matig  
 Ernstig  
 Zeer ernstig

---

1  
2  
3  
4  
5  
6  
7  
8  
9  
10  
11  
12  
13  
14  
15  
16  
17  
18  
19  
20  
21  
22  
23  
24  
25  
26  
27  
28  
29  
30  
31  
32  
33  
34  
35  
36  
37  
38  
39  
40  
41  
42  
43  
44  
45  
46  
47  
48  
49  
50  
51  
52  
53  
54  
55  
56  
57  
58  
59  
60

|       |                                                                                                                        |                                    |                            |                             |                                    |                                    |
|-------|------------------------------------------------------------------------------------------------------------------------|------------------------------------|----------------------------|-----------------------------|------------------------------------|------------------------------------|
| 10.16 | Hoeveel voet/enkel pijn heeft u gehad in de afgelopen week bij het rechtop staan?                                      | <input type="radio"/> Geen         | <input type="radio"/> Mild | <input type="radio"/> Matig | <input type="radio"/> Ernstig      | <input type="radio"/> Zeer ernstig |
| 10.17 | In welke mate werd u gehinderd bij het trap aflopen?                                                                   | <input type="radio"/> Niet Ernstig | <input type="radio"/> Mild | <input type="radio"/> Matig | <input type="radio"/> Zeer ernstig | <input type="radio"/>              |
| 10.18 | In welke mate werd u gehinderd bij het trap op lopen?                                                                  | <input type="radio"/> Niet Ernstig | <input type="radio"/> Mild | <input type="radio"/> Matig | <input type="radio"/> Zeer ernstig | <input type="radio"/>              |
| 10.19 | In welke mate werd u gehinderd als u vanuit een zittende positie ging staan?                                           | <input type="radio"/> Niet Ernstig | <input type="radio"/> Mild | <input type="radio"/> Matig | <input type="radio"/> Zeer ernstig | <input type="radio"/>              |
| 10.20 | In welke mate werd u gehinderd bij het staan?                                                                          | <input type="radio"/> Niet Ernstig | <input type="radio"/> Mild | <input type="radio"/> Matig | <input type="radio"/> Zeer ernstig | <input type="radio"/>              |
| 10.21 | In welke mate werd u gehinderd bij het naar de grond buigen/iets oprapen?                                              | <input type="radio"/> Niet Ernstig | <input type="radio"/> Mild | <input type="radio"/> Matig | <input type="radio"/> Zeer ernstig | <input type="radio"/>              |
| 10.22 | In welke mate werd u gehinderd bij het lopen op een vlakke ondergrond?                                                 | <input type="radio"/> Niet Ernstig | <input type="radio"/> Mild | <input type="radio"/> Matig | <input type="radio"/> Zeer ernstig | <input type="radio"/>              |
| 10.23 | In welke mate werd u gehinderd bij het in- en uit de auto stappen?                                                     | <input type="radio"/> Niet Ernstig | <input type="radio"/> Mild | <input type="radio"/> Matig | <input type="radio"/> Zeer ernstig | <input type="radio"/>              |
| 10.24 | In welke mate werd u gehinderd bij het boodschappen doen?                                                              | <input type="radio"/> Niet Ernstig | <input type="radio"/> Mild | <input type="radio"/> Matig | <input type="radio"/> Zeer ernstig | <input type="radio"/>              |
| 10.25 | In welke mate werd u gehinderd bij sokken/panty's aantrekken?                                                          | <input type="radio"/> Niet Ernstig | <input type="radio"/> Mild | <input type="radio"/> Matig | <input type="radio"/> Zeer ernstig | <input type="radio"/>              |
| 10.26 | In welke mate werd u gehinderd bij het opstaan uit bed?                                                                | <input type="radio"/> Niet Ernstig | <input type="radio"/> Mild | <input type="radio"/> Matig | <input type="radio"/> Zeer ernstig | <input type="radio"/>              |
| 10.27 | In welke mate werd u gehinderd bij het sokken uittrekken?                                                              | <input type="radio"/> Niet Ernstig | <input type="radio"/> Mild | <input type="radio"/> Matig | <input type="radio"/> Zeer ernstig | <input type="radio"/>              |
| 10.28 | In welke mate werd u gehinderd bij het in bed liggen (omdraaien, lange tijd uw voet/enkel in dezelfde positie houden)? | <input type="radio"/> Niet Ernstig | <input type="radio"/> Mild | <input type="radio"/> Matig | <input type="radio"/> Zeer ernstig | <input type="radio"/>              |

|                                                                |       |                                                                                                                  |                                                                                                                                                                    |                                                                      |                             |                              |
|----------------------------------------------------------------|-------|------------------------------------------------------------------------------------------------------------------|--------------------------------------------------------------------------------------------------------------------------------------------------------------------|----------------------------------------------------------------------|-----------------------------|------------------------------|
| 1<br>2<br>3<br>4<br>5                                          | 10.29 | In welke mate werd u gehinderd bij het in/uit bad stappen?                                                       | <input type="radio"/> Niet<br>Ernstig                                                                                                                              | <input type="radio"/> Mild<br><input type="radio"/> Zeer ernstig     | <input type="radio"/> Matig | <input type="radio"/>        |
| 6<br>7<br>8<br>9                                               | 10.30 | In welke mate werd u gehinderd bij zitten?                                                                       | <input type="radio"/> Niet<br>Ernstig                                                                                                                              | <input type="radio"/> Mild<br><input type="radio"/> Zeer ernstig     | <input type="radio"/> Matig | <input type="radio"/>        |
| 10<br>11<br>12<br>13<br>14                                     | 10.31 | In welke mate werd u gehinderd bij het toilet op en af gaan?                                                     | <input type="radio"/> Niet<br>Ernstig                                                                                                                              | <input type="radio"/> Mild<br><input type="radio"/> Zeer ernstig     | <input type="radio"/> Matig | <input type="radio"/>        |
| 15<br>16<br>17<br>18                                           | 10.32 | In welke mate werd u gehinderd bij zwaar huishoudelijk werk (bijvoorbeeld zware dozen sjouwen, vloer schrobben)? | <input type="radio"/> Niet<br>Ernstig                                                                                                                              | <input type="radio"/> Mild<br><input type="radio"/> Zeer ernstig     | <input type="radio"/> Matig | <input type="radio"/>        |
| 19<br>20<br>21<br>22<br>23                                     | 10.33 | In welke mate werd u gehinderd bij licht huishoudelijk werk (bijvoorbeeld koken, afstoffen)?                     | <input type="radio"/> Niet<br>Ernstig                                                                                                                              | <input type="radio"/> Mild<br><input type="radio"/> Zeer ernstig     | <input type="radio"/> Matig | <input type="radio"/>        |
| 24<br>25<br>26<br>27                                           | 10.34 | In welke mate werd u gehinderd bij hurken?                                                                       | <input type="radio"/> Niet<br>Ernstig                                                                                                                              | <input type="radio"/> Mild<br><input type="radio"/> Zeer ernstig     | <input type="radio"/> Matig | <input type="radio"/>        |
| 28<br>29<br>30<br>31<br>32                                     | 10.35 | In welke mate werd u gehinderd bij hardlopen?                                                                    | <input type="radio"/> Niet<br>Ernstig                                                                                                                              | <input type="radio"/> Mild<br><input type="radio"/> Zeer ernstig     | <input type="radio"/> Matig | <input type="radio"/>        |
| 33<br>34<br>35<br>36                                           | 10.36 | In welke mate werd u gehinderd bij springen?                                                                     | <input type="radio"/> Niet<br>Ernstig                                                                                                                              | <input type="radio"/> Mild<br><input type="radio"/> Zeer ernstig     | <input type="radio"/> Matig | <input type="radio"/>        |
| 37<br>38<br>39<br>40                                           | 10.37 | In welke mate werd u gehinderd bij ronddraaien op uw aangedane voet/enkel?                                       | <input type="radio"/> Niet<br>Ernstig                                                                                                                              | <input type="radio"/> Mild<br><input type="radio"/> Zeer ernstig     | <input type="radio"/> Matig | <input type="radio"/>        |
| 41<br>42<br>43<br>44<br>45                                     | 10.38 | In welke mate werd u gehinderd bij knielen?                                                                      | <input type="radio"/> Niet<br>Ernstig                                                                                                                              | <input type="radio"/> Mild<br><input type="radio"/> Zeer ernstig     | <input type="radio"/> Matig | <input type="radio"/>        |
| 46<br>47<br>48<br>49                                           | 10.39 | Hoe vaak bent u zich bewust van uw voet/enkel probleem?                                                          | <input type="radio"/> Nooit<br>Wekelijks                                                                                                                           | <input type="radio"/> Maandelijks<br><input type="radio"/> Dagelijks | <input type="radio"/>       | <input type="radio"/> Altijd |
| 50<br>51<br>52<br>53<br>54<br>55<br>56<br>57<br>58<br>59<br>60 | 10.40 | Heeft u uw leven veranderd om activiteiten te vermijden die schadelijk kunnen zijn voor uw voet/enkel?           | <input type="radio"/> Niet<br><input type="radio"/> Enigszins<br><input type="radio"/> Matig<br><input type="radio"/> Behoorlijk<br><input type="radio"/> Volledig |                                                                      |                             |                              |



- 1  
2  
3  
4  
5  
6  
7  
8  
9
- 
- 10.41 In hoeverre kunt u op uw voet/enkel vertrouwen?
- Volledig  
 Behoorlijk  
 Matig  
 Enigzins  
 Niet

- 10  
11  
12  
13  
14  
15  
16  
17  
18  
19  
20  
21  
22
- 
- 10.42 In het algemeen, in welke mate ondervindt u hinder van uw voet/enkel
- Geen  
 Mild  
 Matig  
 Ernstig  
 Zeer ernstig

## Vragenlijst PRIMA studie 5 jaar - Dank

| Number | Question | Answers |
|--------|----------|---------|
|--------|----------|---------|

- 23  
24  
25  
26  
27  
28  
29  
30  
31  
32  
33  
34  
35  
36  
37
- |      |                                                                                                                                               |                                                                          |
|------|-----------------------------------------------------------------------------------------------------------------------------------------------|--------------------------------------------------------------------------|
| 11.1 | Hartelijk dank voor de tijd die u heeft genomen om de vragenlijsten in te vullen. Indien u nog opmerkingen heeft kunt u deze hierin plaatsen. | <div style="border: 1px dashed black; height: 60px; width: 100%;"></div> |
|------|-----------------------------------------------------------------------------------------------------------------------------------------------|--------------------------------------------------------------------------|

## Survey 'Vragenlijst PRIMA studie 52 weken'

### Vragenlijst PRIMA studie 52 weken - AOFAS - Pijn

| Number | Question | Answers |
|--------|----------|---------|
|--------|----------|---------|

- 38  
39  
40  
41  
42  
43  
44  
45  
46  
47  
48  
49  
50  
51  
52  
53  
54  
55  
56
- |     |                                     |                                                                                                                                                                                                                 |
|-----|-------------------------------------|-----------------------------------------------------------------------------------------------------------------------------------------------------------------------------------------------------------------|
| 1.1 | Hoeveel pijn ervaart u aan uw voet? | <input type="checkbox"/> Geen<br><input type="checkbox"/> Milde pijnklachten of af en toe pijn<br><input type="checkbox"/> Matige pijnklachten, dagelijks<br><input type="checkbox"/> Vrijwel continu erge pijn |
|-----|-------------------------------------|-----------------------------------------------------------------------------------------------------------------------------------------------------------------------------------------------------------------|

### Vragenlijst PRIMA studie 52 weken - AOFAS resterende gedeelte

| Number | Question                                                                                                                   | Answers                                                                                                                                                                                                                                                                                                                                                                                                                                           |
|--------|----------------------------------------------------------------------------------------------------------------------------|---------------------------------------------------------------------------------------------------------------------------------------------------------------------------------------------------------------------------------------------------------------------------------------------------------------------------------------------------------------------------------------------------------------------------------------------------|
| 2.1    | Hoeveel beperkingen in het dagelijks leven ervaart u?                                                                      | <input type="radio"/> Geen beperkingen, geen hulpmiddelen nodig<br><input type="radio"/> Geen beperkingen in algemeen dagelijkse bezigheden, wel beperkingen in recreatieve activiteiten (sport, hobbies, etc) geen ondersteuning<br><input type="radio"/> Beperkingen bij dagelijkse- en recreatieve activiteiten, stok<br><input type="radio"/> Ernstige beperkingen bij dagelijkse- en recreatieactiviteiten, walker, krukken, rolstoel, brace |
| 2.2    | Wat is de afstand die u in één keer kunt lopen?                                                                            | <input type="radio"/> Meer dan 600 meter<br><input type="radio"/> 400 - 600 meter<br><input type="radio"/> 100 - 300 meter<br><input type="radio"/> Minder dan 100 meter                                                                                                                                                                                                                                                                          |
| 2.3    | Heeft u moeite met lopen op een bepaalde ondergrond?                                                                       | <input type="radio"/> Geen problemen bij lopen<br><input type="radio"/> Enig problemen op ongelijke ondergrond, trap, helling, ladders<br><input type="radio"/> Ernstige problemen bij ongelijke ondergrond, trap, helling, ladders                                                                                                                                                                                                               |
| 2.4    | Hoe zou u uw looppatroon beoordelen?                                                                                       | <input type="radio"/> Normaal of minimaal afwijkend<br><input type="radio"/> Duidelijk<br><input type="radio"/> Ernstig                                                                                                                                                                                                                                                                                                                           |
| 2.5    | Hoe zou u de beweeglijkheid van uw voet beoordelen ten opzichte van de andere zijde of ten opzichte van vóór het ongeval?  | <input type="radio"/> Hetzelfde of licht beperkt t.o.v. de niet aangedane zijde of zoals voor het ongeval<br><input type="radio"/> Ongeveer de helft beperkt<br><input type="radio"/> Sterk verminderd, bijna geen bewegingen mogelijk                                                                                                                                                                                                            |
| 2.6    | Hoe zou u de beweeglijkheid van uw enkel beoordelen ten opzichte van de andere zijde of ten opzichte van voor het ongeval? | <input type="radio"/> Hetzelfde of licht beperkt t.o.v. de niet aangedane zijde of zoals voor het ongeval<br><input type="radio"/> Ongeveer de helft beperkt<br><input type="radio"/> Sterk verminderd, bijna geen bewegingen mogelijk                                                                                                                                                                                                            |
| 2.7    | Hoe zou u de stabiliteit van uw voet en enkel beoordelen                                                                   | <input type="radio"/> Stabiel, ik verzwik mijn enkel hooguit incidenteel<br><input type="radio"/> Niet stabiel, ik verzwik mijn enkel vaak                                                                                                                                                                                                                                                                                                        |

1  
2  
3  
4  
5  
6  
7  
8  
9  
10  
11  
12  
13  
14  
15  
16  
17  
18  
19  
20  
21  
22  
23  
24  
25  
26  
27  
28  
29  
30  
31  
32  
33  
34  
35  
36  
37  
38  
39  
40  
41  
42  
43  
44  
45  
46  
47  
48  
49  
50  
51  
52  
53  
54  
55  
56  
57  
58  
59  
60

|     |                                                                                                                  |                                                                                                                                                                                                                                                                                                             |
|-----|------------------------------------------------------------------------------------------------------------------|-------------------------------------------------------------------------------------------------------------------------------------------------------------------------------------------------------------------------------------------------------------------------------------------------------------|
| 2.8 | Hoe zou u de stand van uw voet beoordelen ten opzichte van de andere zijde of ten opzichte van voor het ongeval? | <input type="radio"/> Goed, ik kan mijn voet goed plat op de grond zetten, waarbij de stand niet afwijkend is<br><input type="radio"/> Ik sta vrijwel alleen op de buitenzijde van mijn voet<br><input type="radio"/> Ik kan mijn voet niet plat op de grond zetten en loop vrijwel alleen op mijn voorvoet |
|-----|------------------------------------------------------------------------------------------------------------------|-------------------------------------------------------------------------------------------------------------------------------------------------------------------------------------------------------------------------------------------------------------------------------------------------------------|

### Vragenlijst PRIMA studie 52 weken - VAS Pain score

| Number | Question                                                                                                                                                             | Answers             |
|--------|----------------------------------------------------------------------------------------------------------------------------------------------------------------------|---------------------|
| 3.1    | VAS pijnscore (Geef uw minimaal pijnscore aan tijdens dagelijkse activiteiten op een schaal van 0 tot 100, waarbij 0 geen pijn is en 100 de ergste pijn denkbaar is) | (0.00) 100 (100.00) |

### Vragenlijst PRIMA studie 52 weken - AAS

| Number | Question | Answers |
|--------|----------|---------|
|--------|----------|---------|

- 1  
2  
3  
4  
5  
6  
7  
8  
9  
10  
11  
12  
13  
14  
15  
16  
17  
18  
19  
20  
21  
22  
23  
24  
25  
26  
27  
28  
29  
30  
31  
32  
33  
34  
35  
36  
37  
38  
39  
40  
41  
42  
43  
44  
45  
46  
47  
48  
49  
50  
51  
52  
53  
54  
55  
56  
57  
58  
59  
60
- 4.1 Wat is het meest bij u van toepassing ten aanzien van uw acitiviteit?
- American Football
  - Basketbal
  - Gymnastiek/turnen
  - Handbal
  - Rugby
  - Voetbal
  - Hockey
  - Korfbal
  - Gevechtssporten: judo, karate, kung fu, taekwando, jiu jitsu, etc.
  - Oriëntatiewandelen
  - Rhythmische gymnastiek
  - Volleybal
  - Boxen
  - Freestyle snowboarden
  - IJshockey
  - Tennis
  - Worstelen
  - Fitness, aerobics
  - Badminton
  - Baseball
  - Cross-country hardlopen
  - Moderne pentathlon
  - Squash
  - Surfen, windsurfen
  - Tafel tennis
  - Atletiek: spring-, werponderdelen
  - Waterskiën
  - Dans
  - Schermen
  - Zaalhockey
  - Bergbeklimmen
  - Langlauf
  - Parachute springen
  - Softball
  - Speciale beroepen en werkactiviteiten; speciale beroepen: ballet, professioneel soldaat, speciale reddingswerker, stuntman, etc.
  - Duiken
  - Scubaduiken
  - Skaten, in-line skaten
  - Atletiek: looponderdelen
  - Triatlon
  - Gewichtsheffen, body-building

- Alle competitieve sporten hieronder met 'seasonal' conditioning
- Zwaar fysiek werk
- Alpine skiën en snowboarden
- Bowlen/curlen
- Golf
- Mountainbike/BMX
- Powerliften
- Zeilen
- Fysiek werk
- Wielrennen
- Paardrijden
- Motorsporten/technische sporten
- Roeien, kayakken
- Boogschieten
- Water polo en zwemmen
- Kunnen lopen op oneven grond
- Geen sport, echter geen limitatie in dagelijkse activiteiten
- Kunnen lopen op even grond, maar de dagelijkse activiteiten zijn gelimiteerd
- Niet kunnen lopen, fysieke handicap wegens enkelproblemen

- 
- 4.1.1 ***If 'Wat is het meest bij u van toepassing ten aanzien van uw acitviteit?' is equal to 'American Football' answer this question:***  
American Football
- Professioneel
- Competitief
- Recreatief
- 
- 4.1.2 ***If 'Wat is het meest bij u van toepassing ten aanzien van uw acitviteit?' is equal to 'Basketbal' answer this question:***  
Basketbal
- Professioneel
- Competitief
- Recreatief
- 
- 4.1.3 ***If 'Wat is het meest bij u van toepassing ten aanzien van uw acitviteit?' is equal to 'Gymnastiek/turnen' answer this question:***  
Gymnastiek/turnen
- Professioneel
- Competitief
- Recreatief
- 
- 4.1.4 ***If 'Wat is het meest bij u van toepassing ten aanzien van uw acitviteit?' is equal to 'Handbal' answer this question:***  
Handbal
- Professioneel
- Competitief
- Recreatief
- 
- 4.1.5 ***If 'Wat is het meest bij u van toepassing ten aanzien van uw acitviteit?' is equal to 'Rugby' answer this question:***  
Rugby
- Professioneel
- Competitief
- Recreatief

|    |        |                                                                                                                                                                                          |                                     |
|----|--------|------------------------------------------------------------------------------------------------------------------------------------------------------------------------------------------|-------------------------------------|
| 1  |        |                                                                                                                                                                                          |                                     |
| 2  | 4.1.6  | <b>If 'Wat is het meest bij u van toepassing ten aanzien van uw acitiviteit?' is equal to 'Voetbal' answer this question:</b>                                                            | <input type="radio"/> Professioneel |
| 3  |        |                                                                                                                                                                                          | <input type="radio"/> Competitief   |
| 4  |        |                                                                                                                                                                                          | <input type="radio"/> Recreatief    |
| 5  |        | Voetbal                                                                                                                                                                                  |                                     |
| 6  |        |                                                                                                                                                                                          |                                     |
| 7  |        |                                                                                                                                                                                          |                                     |
| 8  | 4.1.7  | <b>If 'Wat is het meest bij u van toepassing ten aanzien van uw acitiviteit?' is equal to 'Hockey' answer this question:</b>                                                             | <input type="radio"/> Professioneel |
| 9  |        |                                                                                                                                                                                          | <input type="radio"/> Competitief   |
| 10 |        |                                                                                                                                                                                          | <input type="radio"/> Recreatief    |
| 11 |        | Hockey                                                                                                                                                                                   |                                     |
| 12 |        |                                                                                                                                                                                          |                                     |
| 13 |        |                                                                                                                                                                                          |                                     |
| 14 | 4.1.8  | <b>If 'Wat is het meest bij u van toepassing ten aanzien van uw acitiviteit?' is equal to 'Korfbal' answer this question:</b>                                                            | <input type="radio"/> Professioneel |
| 15 |        |                                                                                                                                                                                          | <input type="radio"/> Competitief   |
| 16 |        |                                                                                                                                                                                          | <input type="radio"/> Recreatief    |
| 17 |        | Korfbal                                                                                                                                                                                  |                                     |
| 18 |        |                                                                                                                                                                                          |                                     |
| 19 |        |                                                                                                                                                                                          |                                     |
| 20 | 4.1.9  | <b>If 'Wat is het meest bij u van toepassing ten aanzien van uw acitiviteit?' is equal to 'Gevechtssporten: judo, karate, kung fu, taekwando, jiu jitsu, etc.' answer this question:</b> | <input type="radio"/> Professioneel |
| 21 |        |                                                                                                                                                                                          | <input type="radio"/> Competitief   |
| 22 |        |                                                                                                                                                                                          | <input type="radio"/> Recreatief    |
| 23 |        | Gevechtssporten: judo, karate, kung fu, taekwando, jiu                                                                                                                                   |                                     |
| 24 |        | jitsu, etc.                                                                                                                                                                              |                                     |
| 25 |        |                                                                                                                                                                                          |                                     |
| 26 |        |                                                                                                                                                                                          |                                     |
| 27 | 4.1.10 | <b>If 'Wat is het meest bij u van toepassing ten aanzien van uw acitiviteit?' is equal to 'Oriëntatielopen' answer this question:</b>                                                    | <input type="radio"/> Professioneel |
| 28 |        |                                                                                                                                                                                          | <input type="radio"/> Competitief   |
| 29 |        |                                                                                                                                                                                          | <input type="radio"/> Recreatief    |
| 30 |        | Oriëntatielopen                                                                                                                                                                          |                                     |
| 31 |        |                                                                                                                                                                                          |                                     |
| 32 |        |                                                                                                                                                                                          |                                     |
| 33 | 4.1.11 | <b>If 'Wat is het meest bij u van toepassing ten aanzien van uw acitiviteit?' is equal to 'Rhythmische gymnastiek' answer this question:</b>                                             | <input type="radio"/> Professioneel |
| 34 |        |                                                                                                                                                                                          | <input type="radio"/> Competitief   |
| 35 |        |                                                                                                                                                                                          | <input type="radio"/> Recreatief    |
| 36 |        | Rhythmisch gymnastiek                                                                                                                                                                    |                                     |
| 37 |        |                                                                                                                                                                                          |                                     |
| 38 |        |                                                                                                                                                                                          |                                     |
| 39 | 4.1.12 | <b>If 'Wat is het meest bij u van toepassing ten aanzien van uw acitiviteit?' is equal to 'Volleybal' answer this question:</b>                                                          | <input type="radio"/> Professioneel |
| 40 |        |                                                                                                                                                                                          | <input type="radio"/> Competitief   |
| 41 |        |                                                                                                                                                                                          | <input type="radio"/> Recreatief    |
| 42 |        | Volleybal                                                                                                                                                                                |                                     |
| 43 |        |                                                                                                                                                                                          |                                     |
| 44 | 4.1.13 | <b>If 'Wat is het meest bij u van toepassing ten aanzien van uw acitiviteit?' is equal to 'Boxen' answer this question:</b>                                                              | <input type="radio"/> Professioneel |
| 45 |        |                                                                                                                                                                                          | <input type="radio"/> Competitief   |
| 46 |        |                                                                                                                                                                                          | <input type="radio"/> Recreatief    |
| 47 |        | Boxen                                                                                                                                                                                    |                                     |
| 48 |        |                                                                                                                                                                                          |                                     |
| 49 |        |                                                                                                                                                                                          |                                     |
| 50 | 4.1.14 | <b>If 'Wat is het meest bij u van toepassing ten aanzien van uw acitiviteit?' is equal to 'Freestyle snowboarden' answer this question:</b>                                              | <input type="radio"/> Professioneel |
| 51 |        |                                                                                                                                                                                          | <input type="radio"/> Competitief   |
| 52 |        |                                                                                                                                                                                          | <input type="radio"/> Recreatief    |
| 53 |        | Freestyle snowboarden                                                                                                                                                                    |                                     |
| 54 |        |                                                                                                                                                                                          |                                     |
| 55 |        |                                                                                                                                                                                          |                                     |
| 56 | 4.1.15 | <b>If 'Wat is het meest bij u van toepassing ten aanzien van uw acitiviteit?' is equal to 'Freestyle snowboarden' answer this question:</b>                                              | <input type="radio"/> Professioneel |
| 57 |        |                                                                                                                                                                                          | <input type="radio"/> Competitief   |
| 58 |        |                                                                                                                                                                                          | <input type="radio"/> Recreatief    |
| 59 |        | IJshockey                                                                                                                                                                                |                                     |
| 60 |        |                                                                                                                                                                                          |                                     |

- 1  
2  
3  
4  
5  
6  
7  
8  
9  
10  
11  
12  
13  
14  
15  
16  
17  
18  
19  
20  
21  
22  
23  
24  
25  
26  
27  
28  
29  
30  
31  
32  
33  
34  
35  
36  
37  
38  
39  
40  
41  
42  
43  
44  
45  
46  
47  
48  
49  
50  
51  
52  
53  
54  
55  
56  
57  
58  
59  
60
- 
- 4.1.16 ***If 'Wat is het meest bij u van toepassing ten aanzien van uw acitiviteit?' is equal to 'Tennis' answer this question:***  
Tennis
- Professioneel  
 Competitief  
 Recreatief
- 
- 4.1.17 ***If 'Wat is het meest bij u van toepassing ten aanzien van uw acitiviteit?' is equal to 'Worstelen' answer this question:***  
Worstelen
- Professioneel  
 Competitief  
 Recreatief
- 
- 4.1.18 ***If 'Wat is het meest bij u van toepassing ten aanzien van uw acitiviteit?' is equal to 'Fitness, aerobics' answer this question:***  
Fitness, aerobics
- Professioneel  
 Competitief  
 Recreatief
- 
- 4.1.19 ***If 'Wat is het meest bij u van toepassing ten aanzien van uw acitiviteit?' is equal to 'Badminton' answer this question:***  
Badminton
- Professioneel  
 Competitief  
 Recreatief
- 
- 4.1.20 ***If 'Wat is het meest bij u van toepassing ten aanzien van uw acitiviteit?' is equal to 'Baseball' answer this question:***  
Baseball
- Professioneel  
 Competitief  
 Recreatief
- 
- 4.1.21 ***If 'Wat is het meest bij u van toepassing ten aanzien van uw acitiviteit?' is equal to 'Cross-country hardlopen' answer this question:***  
Cross-country hardlopen
- Professioneel  
 Competitief  
 Recreatief
- 
- 4.1.22 ***If 'Wat is het meest bij u van toepassing ten aanzien van uw acitiviteit?' is equal to 'Moderne pentathlon' answer this question:***  
Moderne pentathlon
- Professioneel  
 Competitief  
 Recreatief
- 
- 4.1.23 ***If 'Wat is het meest bij u van toepassing ten aanzien van uw acitiviteit?' is equal to 'Squash' answer this question:***  
Squash
- Professioneel  
 Competitief  
 Recreatief
- 
- 4.1.24 ***If 'Wat is het meest bij u van toepassing ten aanzien van uw acitiviteit?' is equal to 'Surfen, windsurfen' answer this question:***  
Surfen, windsurfen
- Professioneel  
 Competitief  
 Recreatief
- 
- 4.1.25 ***If 'Wat is het meest bij u van toepassing ten aanzien van uw acitiviteit?' is equal to 'Tafel tennis' answer this question:***  
Tafel tennis
- Professioneel  
 Competitief  
 Recreatief

- 1  
2  
3  
4  
5  
6  
7
- 4.1.26 **If 'Wat is het meest bij u van toepassing ten aanzien van uw acitiviteit?' is equal to 'Atletiek: spring-, werponderdelen' answer this question:**  
Atletiek: spring-, werponderdelen
- Professioneel  
 Competitief  
 Recreatief
- 
- 8  
9  
10  
11  
12
- 4.1.27 **If 'Wat is het meest bij u van toepassing ten aanzien van uw acitiviteit?' is equal to 'Waterskieën' answer this question:**  
Waterskien
- Professioneel  
 Competitief  
 Recreatief
- 
- 13  
14  
15  
16  
17  
18
- 4.1.28 **If 'Wat is het meest bij u van toepassing ten aanzien van uw acitiviteit?' is equal to 'Dans' answer this question:**  
Dans
- Professioneel  
 Competitief  
 Recreatief
- 
- 19  
20  
21  
22  
23  
24
- 4.1.29 **If 'Wat is het meest bij u van toepassing ten aanzien van uw acitiviteit?' is equal to 'Schermen' answer this question:**  
Schermen
- Professioneel  
 Competitief  
 Recreatief
- 
- 25  
26  
27  
28  
29  
30
- 4.1.30 **If 'Wat is het meest bij u van toepassing ten aanzien van uw acitiviteit?' is equal to 'Zaalhockey' answer this question:**  
Zaalhockey
- Professioneel  
 Competitief  
 Recreatief
- 
- 31  
32  
33  
34  
35
- 4.1.31 **If 'Wat is het meest bij u van toepassing ten aanzien van uw acitiviteit?' is equal to 'Bergbeklimmen' answer this question:**  
Bergbeklimmen
- Professioneel  
 Competitief  
 Recreatief
- 
- 36  
37  
38  
39  
40  
41
- 4.1.32 **If 'Wat is het meest bij u van toepassing ten aanzien van uw acitiviteit?' is equal to 'Langlauf' answer this question:**  
Langlauf
- Professioneel  
 Competitief  
 Recreatief
- 
- 42  
43  
44  
45  
46  
47
- 4.1.33 **If 'Wat is het meest bij u van toepassing ten aanzien van uw acitiviteit?' is equal to 'Parachute springen' answer this question:**  
Parachute springen
- Professioneel  
 Competitief  
 Recreatief
- 
- 48  
49  
50  
51  
52  
53  
54  
55  
56  
57  
58  
59  
60
- 4.1.34 **If 'Wat is het meest bij u van toepassing ten aanzien van uw acitiviteit?' is equal to 'Softball' answer this question:**  
Softball
- Professioneel  
 Competitief  
 Recreatief



- 1  
2  
3  
4  
5  
6  
7  
8  
9  
10  
11  
12
- 4.1.35 ***If 'Wat is het meest bij u van toepassing ten aanzien van uw acitiviteit?' is equal to 'Speciale beroepen en werkactiviteiten; speciale beroepen: ballet, professioneel soldaat, speciale reddingswerker, stuntman, etc.'* answer this question:**  
Speciale beroepen en werkactiviteiten speciale beroepen: ballet, professioneel soldaat, speciale reddingswerker, stuntman, etc.
- ballet, professioneel soldaat, speciale reddingswerker, stuntman, etc.
- 
- 13  
14  
15  
16  
17
- 4.1.36 ***If 'Wat is het meest bij u van toepassing ten aanzien van uw acitiviteit?' is equal to 'Duiken' answer this question:***  
Duiken
- Professioneel/competitief  
 Recreatief
- 
- 18  
19  
20  
21  
22
- 4.1.37 ***If 'Wat is het meest bij u van toepassing ten aanzien van uw acitiviteit?' is equal to 'Scubaduiken' answer this question:***  
Scubaduiken
- Professioneel/competitief  
 Recreatief
- 
- 23  
24  
25  
26  
27  
28
- 4.1.38 ***If 'Wat is het meest bij u van toepassing ten aanzien van uw acitiviteit?' is equal to 'Skaten, in-line skaten' answer this question:***  
skaten, in-linen skaten
- Professioneel/competitief  
 Recreatief
- 
- 29  
30  
31  
32  
33
- 4.1.39 ***If 'Wat is het meest bij u van toepassing ten aanzien van uw acitiviteit?' is equal to 'Atletiek: looponderdelen' answer this question:***  
Atletiek: looponderdelen
- Professioneel/competitief  
 Recreatief
- 
- 34  
35  
36  
37  
38
- 4.1.40 ***If 'Wat is het meest bij u van toepassing ten aanzien van uw acitiviteit?' is equal to 'Triatlon' answer this question:***  
triatlon
- Professioneel/competitief  
 Recreatief
- 
- 39  
40  
41  
42  
43  
44  
45
- 4.1.41 ***If 'Wat is het meest bij u van toepassing ten aanzien van uw acitiviteit?' is equal to 'Gewichtsheffen, body-building' answer this question:***  
Gewichtsheffen, body-building
- Professioneel/competitief  
 Recreatief
- 
- 46  
47  
48  
49  
50  
51  
52
- 4.1.42 ***If 'Wat is het meest bij u van toepassing ten aanzien van uw acitiviteit?' is equal to 'Alle competitieve sporten hieronder met 'seasonal' conditioning' answer this question:***  
Alle competitieve sporten hieronder met 'seasonal' conditioning
- Alle competitieve sporten hieronder met 'seasonal' conditioning
- 
- 53  
54  
55  
56  
57  
58  
59  
60
- 4.1.43 ***If 'Wat is het meest bij u van toepassing ten aanzien van uw acitiviteit?' is equal to 'Zwaar fysiek werk' answer this question:***  
Zwaar fysiek werk
- Alle competitieve sporten hieronder met 'seasonal' conditioning

- 1  
2  
3  
4  
5  
6  
7  
8  
9  
10  
11  
12  
13  
14  
15  
16  
17  
18  
19  
20  
21  
22  
23  
24  
25  
26  
27  
28  
29  
30  
31  
32  
33  
34  
35  
36  
37  
38  
39  
40  
41  
42  
43  
44  
45  
46  
47  
48  
49  
50  
51  
52  
53  
54  
55  
56  
57  
58  
59  
60
- 
- 4.1.44 ***If 'Wat is het meest bij u van toepassing ten aanzien van uw acitiviteit?' is equal to 'Alpine skiën en snowboarden' answer this question:***  
Alpine skien en snowboarden  Alpine skien en snowboarden
- 
- 4.1.45 ***If 'Wat is het meest bij u van toepassing ten aanzien van uw acitiviteit?' is equal to 'Bowlen/curlen' answer this question:***  
Bowlen/curlen  Bowlen/curlen
- 
- 4.1.46 ***If 'Wat is het meest bij u van toepassing ten aanzien van uw acitiviteit?' is equal to 'Golf' answer this question:***  
Golf  Golf
- 
- 4.1.47 ***If 'Wat is het meest bij u van toepassing ten aanzien van uw acitiviteit?' is equal to 'Mountainbike/BMX' answer this question:***  
Mountainbike/BMX  Mountainbike/BMX
- 
- 4.1.48 ***If 'Wat is het meest bij u van toepassing ten aanzien van uw acitiviteit?' is equal to 'Powerliften' answer this question:***  
Powerliften  Powerliften
- 
- 4.1.49 ***If 'Wat is het meest bij u van toepassing ten aanzien van uw acitiviteit?' is equal to 'Zeilen' answer this question:***  
Zeilen  Zeilen
- 
- 4.1.50 ***If 'Wat is het meest bij u van toepassing ten aanzien van uw acitiviteit?' is equal to 'Fysiek werk' answer this question:***  
Fysiek werk  Fysiek werk
- 
- 4.1.51 ***If 'Wat is het meest bij u van toepassing ten aanzien van uw acitiviteit?' is equal to 'Wielrennen' answer this question:***  
Wielrennen  Wielrennen
- 
- 4.1.52 ***If 'Wat is het meest bij u van toepassing ten aanzien van uw acitiviteit?' is equal to 'Paardrijden' answer this question:***  
Paardrijden  Paardrijden
- 
- 4.1.53 ***If 'Wat is het meest bij u van toepassing ten aanzien van uw acitiviteit?' is equal to 'Motorsporten/technische sporten' answer this question:***  
Motorsporten/technische sporten  Motorsporten/technische sporten
- 
- 4.1.54 ***If 'Wat is het meest bij u van toepassing ten aanzien van uw acitiviteit?' is equal to 'Roeien, kayakken' answer this question:***  
Roeien, kayakken  Roeien, kayakken

|        |                                                                                                                                                                                                                                                                                   |                                                                                                    |
|--------|-----------------------------------------------------------------------------------------------------------------------------------------------------------------------------------------------------------------------------------------------------------------------------------|----------------------------------------------------------------------------------------------------|
| 4.1.55 | <b>If 'Wat is het meest bij u van toepassing ten aanzien van uw activiteit?' is equal to 'Boogschieten' answer this question:</b><br>Boogschieten                                                                                                                                 | <input type="radio"/> Boogschieten                                                                 |
| 4.1.56 | <b>If 'Wat is het meest bij u van toepassing ten aanzien van uw activiteit?' is equal to 'Water polo en zwemmen' answer this question:</b><br>Water polo en zwemmen                                                                                                               | <input type="radio"/> Water polo en zwemmen                                                        |
| 4.1.57 | <b>If 'Wat is het meest bij u van toepassing ten aanzien van uw activiteit?' is equal to 'Kunnen lopen op oneven grond' answer this question:</b><br>Kunnen lopen op oneven grond                                                                                                 | <input type="radio"/> Kunnen lopen op oneven grond                                                 |
| 4.1.58 | <b>If 'Wat is het meest bij u van toepassing ten aanzien van uw activiteit?' is equal to 'Geen sport, echter geen limitatie in dagelijkse activiteiten' answer this question:</b><br>Geen sport, echter geen limitatie in dagelijkse activiteiten                                 | <input type="radio"/> Geen sport, echter geen limitatie in dagelijkse activiteiten                 |
| 4.1.59 | <b>If 'Wat is het meest bij u van toepassing ten aanzien van uw activiteit?' is equal to 'Kunnen lopen op even grond, maar de dagelijkse activiteiten zijn gelimiteerd' answer this question:</b><br>Kunnen lopen op even grond, maar de dagelijkse activiteiten zijn gelimiteerd | <input type="radio"/> Kunnen lopen op even grond, maar de dagelijkse activiteiten zijn gelimiteerd |
| 4.1.60 | <b>If 'Wat is het meest bij u van toepassing ten aanzien van uw activiteit?' is equal to 'Niet kunnen lopen, fysieke handicap wegens enkelproblemen' answer this question:</b><br>Niet kunnen lopen, fysieke handicap wegens enkelproblemen                                       | <input type="radio"/> Niet kunnen lopen, fysieke handicap wegens enkelproblemen                    |

## Vragenlijst PRIMA studie 52 weken - Hoe tevreden bent u over de enkelklachten?

| Number | Question                                   | Answers                                                                                                                       |
|--------|--------------------------------------------|-------------------------------------------------------------------------------------------------------------------------------|
| 5.1    | Hoe tevreden bent u over de enkelklachten? | <input type="radio"/> Slecht<br><input type="radio"/> Matig<br><input type="radio"/> Goed<br><input type="radio"/> Uitstekend |

## Vragenlijst PRIMA studie 52 weken - SF-36

| Number | Question                                                                                                                                                                                                                                                                                                                                                           | Answers                                                                                                                                                                                                                                                                                   |
|--------|--------------------------------------------------------------------------------------------------------------------------------------------------------------------------------------------------------------------------------------------------------------------------------------------------------------------------------------------------------------------|-------------------------------------------------------------------------------------------------------------------------------------------------------------------------------------------------------------------------------------------------------------------------------------------|
|        | Deze vragenlijst gaat over uw standpunten t.a.v. uw gezondheid. Met behulp van deze gegevens kan worden bijgehouden hoe u zich voelt en hoe goed u in staat bent uw gebruikelijke bezigheden uit te voeren. Beantwoord elke vraag door een antwoord aan te klikken. Als u niet zeker weet hoe u een vraag moet beantwoorden, geef dan het best mogelijke antwoord. |                                                                                                                                                                                                                                                                                           |
| 6.1    | Hoe zou u over het algemeen uw gezondheid noemen?                                                                                                                                                                                                                                                                                                                  | <input type="radio"/> Uitstekend <input type="radio"/> Zeer goed <input type="radio"/> Goed <input type="radio"/> Matig <input type="radio"/> Slecht                                                                                                                                      |
| 6.2    | Hoe beoordeelt u nu uw gezondheid over het algemeen vergeleken met een jaar geleden?                                                                                                                                                                                                                                                                               | <input type="radio"/> Veel beter dan een jaar geleden <input type="radio"/> Wat beter dan een jaar geleden <input type="radio"/> Ongeveer hetzelfde als een jaar geleden <input type="radio"/> Wat slechter dan een jaar geleden <input type="radio"/> Veel slechter dan een jaar geleden |
| 6.3    | Wordt u door uw gezondheid op dit moment beperkt bij forse inspanning, zoals hardlopen, tillen van zware voorwerpen of een veeleisende sport beoefenen?                                                                                                                                                                                                            | <input type="radio"/> Ja, ernstig beperkt <input type="radio"/> Ja, een beetje beperkt <input type="radio"/> Nee, helemaal niet beperkt                                                                                                                                                   |
| 6.4    | Wordt u door uw gezondheid op dit moment beperkt bij matige inspanning zoals een tafel verplaatsen, stofzuigen, zwemmen of fietsen?                                                                                                                                                                                                                                | <input type="radio"/> Ja, ernstig beperkt <input type="radio"/> Ja, een beetje beperkt <input type="radio"/> Nee, helemaal niet beperkt                                                                                                                                                   |
| 6.5    | Wordt u door uw gezondheid op dit moment beperkt bij boodschappen tillen of dragen?                                                                                                                                                                                                                                                                                | <input type="radio"/> Ja, ernstig beperkt <input type="radio"/> Ja, een beetje beperkt <input type="radio"/> Nee, helemaal niet beperkt                                                                                                                                                   |
| 6.6    | Wordt u door uw gezondheid op dit moment beperkt bij een paar trappen oplopen?                                                                                                                                                                                                                                                                                     | <input type="radio"/> Ja, ernstig beperkt <input type="radio"/> Ja, een beetje beperkt <input type="radio"/> Nee, helemaal niet beperkt                                                                                                                                                   |
| 6.7    | Wordt u door uw gezondheid op dit moment beperkt bij één trap oplopen?                                                                                                                                                                                                                                                                                             | <input type="radio"/> Ja, ernstig beperkt <input type="radio"/> Ja, een beetje beperkt <input type="radio"/> Nee, helemaal niet beperkt                                                                                                                                                   |
| 6.8    | Wordt u door uw gezondheid op dit moment beperkt bij bukken, knielen of hurken?                                                                                                                                                                                                                                                                                    | <input type="radio"/> Ja, ernstig beperkt <input type="radio"/> Ja, een beetje beperkt <input type="radio"/> Nee, helemaal niet beperkt                                                                                                                                                   |
| 6.9    | Wordt u door uw gezondheid op dit moment beperkt bij meer dan één kilometer lopen?                                                                                                                                                                                                                                                                                 | <input type="radio"/> Ja, ernstig beperkt <input type="radio"/> Ja, een beetje beperkt <input type="radio"/> Nee, helemaal niet beperkt                                                                                                                                                   |
| 6.10   | Wordt u door uw gezondheid op dit moment beperkt bij een paar honderd meter lopen?                                                                                                                                                                                                                                                                                 | <input type="radio"/> Ja, ernstig beperkt <input type="radio"/> Ja, een beetje beperkt <input type="radio"/> Nee, helemaal niet beperkt                                                                                                                                                   |

- 1  
2  
3  
4  
5  
6  
7  
8  
9  
10  
11  
12  
13  
14  
15  
16  
17  
18  
19  
20  
21  
22  
23  
24  
25  
26  
27  
28  
29  
30  
31  
32  
33  
34  
35  
36  
37  
38  
39  
40  
41  
42  
43  
44  
45  
46  
47  
48  
49  
50  
51  
52  
53  
54  
55  
56  
57  
58  
59  
60
- 
- 6.11 Wordt u door uw gezondheid op dit moment beperkt bij ongeveer honderd meter lopen?  Ja, ernstig beperkt  Ja, een beetje beperkt  Nee, helemaal niet beperkt
- 
- 6.12 Wordt u door uw gezondheid op dit moment beperkt bij uzelf wassen of aankleden?  Ja, ernstig beperkt  Ja, een beetje beperkt  Nee, helemaal niet beperkt
- 
- 6.13 U besteedde in de afgelopen 4 weken minder tijd aan werk of andere bezigheden  Ja  Nee
- 
- 6.14 U heeft in de afgelopen 4 weken minder bereikt dan u zou willen  Ja  Nee
- 
- 6.15 U was in de afgelopen 4 weken beperkt in het soort werk of andere bezigheden.  Ja  Nee
- 
- 6.16 U had de afgelopen 4 weken moeite om uw werk of andere bezigheden uit te voeren (het kostte u bijvoorbeeld extra inspanning).  Ja  Nee
- 
- 6.17 U besteedde in de afgelopen 4 weken minder tijd aan werk of andere bezigheden ten gevolge van emotionele problemen  Ja  Nee
- 
- 6.18 U heeft in de afgelopen 4 weken minder bereikt dan u zou willen ten gevolge van emotionele problemen.  Ja  Nee
- 
- 6.19 U deed de afgelopen 4 weken uw werk of andere bezigheden niet zo zorgvuldig als gewoonlijk ten gevolge van emotionele problemen.  Ja  Nee
- 
- 6.20 In hoeverre hebben uw lichamelijke gezondheid of emotionele problemen u gedurende de afgelopen 4 weken gehinderd in uw normale omgang met familie, vrienden of burens, of bij activiteiten in groepsverband?  Helemaal niet  Enigszins  Nogal  Veel  Heel erg veel
- 
- 6.21 Hoeveel lichamelijke pijn heeft u de afgelopen 4 weken gehad?  Geen  Heel licht  Licht  Nogal  Ernstig  Heel ernstig
- 
- 6.22 In welke mate bent u de afgelopen 4 weken door de pijn gehinderd in uw normale werk (zowel werk buitenshuis als huishoudelijk werk)?  Helemaal niet  Een klein beetje  Nogal  Veel  Heel erg veel

1  
2 6.23 Voelde u zich levenslustig?  Altijd  
3  Meestal  
4  Vaak  
5  Soms  
6  Zelden  
7  Nooit  
8  
9  
10

---

11 6.24 Was u erg zenuwachtig?  Altijd  
12  Meestal  
13  Vaak  
14  Soms  
15  Zelden  
16  Nooit  
17  
18  
19  
20

---

21 6.25 Zat u zo in de put dat u niets kon?  Altijd  
22  Meestal  
23  Vaak  
24  Soms  
25  Zelden  
26  Nooit  
27  
28  
29  
30

---

31 6.26 Voelde u zich rustig en tevreden?  Altijd  
32  Meestal  
33  Vaak  
34  Soms  
35  Zelden  
36  Nooit  
37  
38  
39  
40

---

41 6.27 Had u veel energie?  Altijd  
42  Meestal  
43  Vaak  
44  Soms  
45  Zelden  
46  Nooit  
47  
48  
49  
50

---

51 6.28 Voelde u zich somber en neerslachtig?  Altijd  
52  Meestal  
53  Vaak  
54  Soms  
55  Zelden  
56  Nooit  
57  
58  
59  
60

1  
2  
3  
4  
5  
6  
7  
8  
9  
10  
11  
12  
13  
14  
15  
16  
17  
18  
19  
20  
21  
22  
23  
24  
25  
26  
27  
28  
29  
30  
31  
32  
33  
34  
35  
36  
37  
38  
39  
40  
41  
42  
43  
44  
45  
46  
47  
48  
49  
50  
51  
52  
53  
54  
55  
56  
57  
58  
59  
60

---

|      |                         |                                                                                                                                                                                          |
|------|-------------------------|------------------------------------------------------------------------------------------------------------------------------------------------------------------------------------------|
| 6.29 | Voelde u zich uitgeput? | <input type="radio"/> Altijd<br><input type="radio"/> Meestal<br><input type="radio"/> Vaak<br><input type="radio"/> Soms<br><input type="radio"/> Zelden<br><input type="radio"/> Nooit |
|------|-------------------------|------------------------------------------------------------------------------------------------------------------------------------------------------------------------------------------|

---

|      |                          |                                                                                                                                                                                          |
|------|--------------------------|------------------------------------------------------------------------------------------------------------------------------------------------------------------------------------------|
| 6.30 | Was u een gelukkig mens? | <input type="radio"/> Altijd<br><input type="radio"/> Meestal<br><input type="radio"/> Vaak<br><input type="radio"/> Soms<br><input type="radio"/> Zelden<br><input type="radio"/> Nooit |
|------|--------------------------|------------------------------------------------------------------------------------------------------------------------------------------------------------------------------------------|

---

|      |                    |                                                                                                                                                                                          |
|------|--------------------|------------------------------------------------------------------------------------------------------------------------------------------------------------------------------------------|
| 6.31 | Voelde u zich moe? | <input type="radio"/> Altijd<br><input type="radio"/> Meestal<br><input type="radio"/> Vaak<br><input type="radio"/> Soms<br><input type="radio"/> Zelden<br><input type="radio"/> Nooit |
|------|--------------------|------------------------------------------------------------------------------------------------------------------------------------------------------------------------------------------|

---

|      |                                                                                                                                                                                      |                                                                                                                                                            |
|------|--------------------------------------------------------------------------------------------------------------------------------------------------------------------------------------|------------------------------------------------------------------------------------------------------------------------------------------------------------|
| 6.32 | Hoe vaak hebben uw lichamelijke gezondheid of emotionele problemen u gedurende de afgelopen 4 weken gehinderd bij uw sociale activiteiten (zoals vrienden of familie bezoeken etc.)? | <input type="radio"/> Altijd<br><input type="radio"/> Meestal<br><input type="radio"/> Soms<br><input type="radio"/> Zelden<br><input type="radio"/> Nooit |
|------|--------------------------------------------------------------------------------------------------------------------------------------------------------------------------------------|------------------------------------------------------------------------------------------------------------------------------------------------------------|

---

|      |                                                            |                                                                                                                                                                                                              |
|------|------------------------------------------------------------|--------------------------------------------------------------------------------------------------------------------------------------------------------------------------------------------------------------|
| 6.33 | Ik lijk wat gemakkelijker ziek te worden dan andere mensen | <input type="radio"/> Volkomen juist<br><input type="radio"/> Grotendeels juist<br><input type="radio"/> Weet ik niet<br><input type="radio"/> Grotendeels onjuist<br><input type="radio"/> Volkomen onjuist |
|------|------------------------------------------------------------|--------------------------------------------------------------------------------------------------------------------------------------------------------------------------------------------------------------|

---

|      |                                                 |                                                                                                                                                                                                              |
|------|-------------------------------------------------|--------------------------------------------------------------------------------------------------------------------------------------------------------------------------------------------------------------|
| 6.34 | Ik ben even gezond als andere mensen die ik ken | <input type="radio"/> Volkomen juist<br><input type="radio"/> Grotendeels juist<br><input type="radio"/> Weet ik niet<br><input type="radio"/> Grotendeels onjuist<br><input type="radio"/> Volkomen onjuist |
|------|-------------------------------------------------|--------------------------------------------------------------------------------------------------------------------------------------------------------------------------------------------------------------|

- 1  
2  
3  
4  
5  
6  
7  
8  
9
- 
- 6.35 Ik verwacht dat mijn gezondheid achteruit zal gaan
- Volkomen juist
  - Grotendeels juist
  - Weet ik niet
  - Grotendeels onjuist
  - Volkomen onjuist
- 

- 10  
11  
12  
13  
14  
15  
16  
17  
18  
19  
20  
21  
22
- 6.36 Mijn gezondheid is uitstekend
- Volkomen juist
  - Grotendeels juist
  - Weet ik niet
  - Grotendeels onjuist
  - Volkomen onjuist

## Vragenlijst PRIMA studie 52 weken - GAS

| Number | Question                                                                                                                                                                                  | Answers                                                                                                                                                                                                                                                                                                                                                              |
|--------|-------------------------------------------------------------------------------------------------------------------------------------------------------------------------------------------|----------------------------------------------------------------------------------------------------------------------------------------------------------------------------------------------------------------------------------------------------------------------------------------------------------------------------------------------------------------------|
|        | Tijdens de eerste afspraak werd een duidelijk doel met u afgesproken. Dit werd tevens per email naar u gestuurd. Hoe is de situatie nu ten aanzien van de destijds gestelde doelstelling? |                                                                                                                                                                                                                                                                                                                                                                      |
| 7.1    | Wat is nu de situatie ten aanzien van het tijdens de eerste afspraak afgesproken doelstelling (Goal attainment Scaling)?                                                                  | <ul style="list-style-type: none"> <li><input type="radio"/> Achteruitgang (minder dan de uitgangssituatie)</li> <li><input type="radio"/> Uitgangssituatie</li> <li><input type="radio"/> Minder dan het doel</li> <li><input type="radio"/> Doel</li> <li><input type="radio"/> Meer dan het doel</li> <li><input type="radio"/> Veel meer dan het doel</li> </ul> |

## Vragenlijst PRIMA studie 52 weken - EQ-5D-3L

| Number | Question                                                                                                                                                                                                                                                                                                                                                           | Answers                                                                                                                                                                                                                  |
|--------|--------------------------------------------------------------------------------------------------------------------------------------------------------------------------------------------------------------------------------------------------------------------------------------------------------------------------------------------------------------------|--------------------------------------------------------------------------------------------------------------------------------------------------------------------------------------------------------------------------|
|        | Deze vragenlijst gaat over uw standpunten t.a.v. uw gezondheid. Met behulp van deze gegevens kan worden bijgehouden hoe u zich voelt en hoe goed u in staat bent uw gebruikelijke bezigheden uit te voeren. Beantwoord elke vraag door een antwoord aan te klikken. Als u niet zeker weet hoe u een vraag moet beantwoorden, geef dan het best mogelijke antwoord. |                                                                                                                                                                                                                          |
| 8.1    | Hoe is het met uw Mobiliteit gesteld?                                                                                                                                                                                                                                                                                                                              | <ul style="list-style-type: none"> <li><input type="radio"/> Ik heb geen problemen met lopen</li> <li><input type="radio"/> Ik heb enige problemen met lopen</li> <li><input type="radio"/> Ik ben bedlegerig</li> </ul> |



|                                                                                                                                                                                                                                     |                                                                                                                  |                                                                                                                                                                                                                                                             |
|-------------------------------------------------------------------------------------------------------------------------------------------------------------------------------------------------------------------------------------|------------------------------------------------------------------------------------------------------------------|-------------------------------------------------------------------------------------------------------------------------------------------------------------------------------------------------------------------------------------------------------------|
| 8.2                                                                                                                                                                                                                                 | Hoe is het met uw Zelfzorg gesteld?                                                                              | <input type="radio"/> Ik heb geen problemen om mijzelf te wassen of aan te kleden<br><input type="radio"/> Ik heb enige problemen om mijzelf te wassen of aan te kleden<br><input type="radio"/> Ik ben niet in staat om mijzelf te wassen of aan te kleden |
| 8.3                                                                                                                                                                                                                                 | Hoe is het met de Dagelijkse activiteiten (werk, studie, huishouden, gezins- en vrijetijdsactiviteiten) gesteld? | <input type="radio"/> Ik heb geen problemen met mijn dagelijkse activiteiten<br><input type="radio"/> Ik heb enige problemen met mijn dagelijkse activiteiten<br><input type="radio"/> Ik ben niet in staat om mijn dagelijkse activiteiten uit te voeren   |
| 8.4                                                                                                                                                                                                                                 | Hoe is het met de Pijn/klachten gesteld?                                                                         | <input type="radio"/> Ik heb geen pijn of andere klachten<br><input type="radio"/> Ik heb matige pijn of andere klachten<br><input type="radio"/> Ik heb zeer ernstige pijn of andere klachten                                                              |
| 8.5                                                                                                                                                                                                                                 | Hoe is het met de Stemming gesteld?                                                                              | <input type="radio"/> Ik ben niet angstig of somber<br><input type="radio"/> Ik ben matig angstig of somber<br><input type="radio"/> Ik ben erg angstig of somber                                                                                           |
| We willen weten hoe goed of slecht uw gezondheid VANDAAG is. Deze meetschaal loopt van 0 tot 100: 100 staat voor de BESTE gezondheid die u zich kunt voorstellen - 0 staat voor de SLECHTSTE gezondheid die u zich kunt voorstellen |                                                                                                                  |                                                                                                                                                                                                                                                             |
| 8.6                                                                                                                                                                                                                                 | Uw Gezondheid vandaag                                                                                            | (0.00) (100.00)                                                                                                                                                                                                                                             |

## Vragenlijst PRIMA studie 52 weken - AOS

| Number                                                                                                                                                                                                                                                                                                                                                                                                               | Question                                                   | Answers                                                                                            |
|----------------------------------------------------------------------------------------------------------------------------------------------------------------------------------------------------------------------------------------------------------------------------------------------------------------------------------------------------------------------------------------------------------------------|------------------------------------------------------------|----------------------------------------------------------------------------------------------------|
| <p>Instructies: De lijn naast elke vraag staat voor hoeveel PIJN u heeft in verschillende situaties. De linker kant (0) is "geen pijn" en de rechter kant (100) is "ergste pijn denkbaar". Geef voor de onderstaande situaties op de lijn aan hoeveel PIJN u in de afgelopen week in de enkel had. Als een of meerdere van deze situaties niet van toepassing waren, dan kiest u de "niet van toepassing" optie.</p> |                                                            |                                                                                                    |
| 9.1                                                                                                                                                                                                                                                                                                                                                                                                                  | Wat was de hoogte van de ergste pijn in de afgelopen week? | (0.00) (100.00)                                                                                    |
| 9.2                                                                                                                                                                                                                                                                                                                                                                                                                  | Heeft u pijn als u 's ochtends opstaat?                    | <input type="radio"/> Ja<br><input type="radio"/> Nee<br><input type="radio"/> Niet van toepassing |

|    |       |                                                                                                                     |                                           |
|----|-------|---------------------------------------------------------------------------------------------------------------------|-------------------------------------------|
| 1  |       |                                                                                                                     |                                           |
| 2  | 9.2.1 | <b><i>If 'Heeft u pijn als u 's ochtends opstaat?' is equal to 'Ja' answer this question:</i></b>                   | (0.00) (100.00)                           |
| 3  |       | Hoeveel pijn heeft u voordat u 's ochtends opstaat?                                                                 |                                           |
| 4  |       |                                                                                                                     |                                           |
| 5  |       |                                                                                                                     |                                           |
| 6  | 9.3   | Heeft u pijn wanneer u op blote voeten loopt?                                                                       | <input type="radio"/> Ja                  |
| 7  |       |                                                                                                                     | <input type="radio"/> Nee                 |
| 8  |       |                                                                                                                     | <input type="radio"/> Niet van toepassing |
| 9  |       |                                                                                                                     |                                           |
| 10 |       |                                                                                                                     |                                           |
| 11 |       |                                                                                                                     |                                           |
| 12 | 9.3.1 | <b><i>If 'Heeft u pijn wanneer u op blote voeten loopt?' is equal to 'Ja' answer this question:</i></b>             | (0.00) (100.00)                           |
| 13 |       | Hoeveel pijn heeft u als u op blote voeten loopt?                                                                   |                                           |
| 14 |       |                                                                                                                     |                                           |
| 15 |       |                                                                                                                     |                                           |
| 16 | 9.4   | Heeft u pijn wanneer u op blote voeten staat?                                                                       | <input type="radio"/> Ja                  |
| 17 |       |                                                                                                                     | <input type="radio"/> Nee                 |
| 18 |       |                                                                                                                     | <input type="radio"/> Niet van toepassing |
| 19 |       |                                                                                                                     |                                           |
| 20 |       |                                                                                                                     |                                           |
| 21 |       |                                                                                                                     |                                           |
| 22 | 9.4.1 | <b><i>If 'Heeft u pijn wanneer u op blote voeten staat?' is equal to 'Ja' answer this question:</i></b>             | (0.00) (100.00)                           |
| 23 |       | Hoeveel pijn heeft u als u op blote voeten staat?                                                                   |                                           |
| 24 |       |                                                                                                                     |                                           |
| 25 |       |                                                                                                                     |                                           |
| 26 | 9.5   | Heeft u pijn wanneer u met schoenen loopt?                                                                          | <input type="radio"/> Ja                  |
| 27 |       |                                                                                                                     | <input type="radio"/> Nee                 |
| 28 |       |                                                                                                                     | <input type="radio"/> Niet van toepassing |
| 29 |       |                                                                                                                     |                                           |
| 30 |       |                                                                                                                     |                                           |
| 31 |       |                                                                                                                     |                                           |
| 32 | 9.5.1 | <b><i>If 'Heeft u pijn wanneer u met schoenen loopt?' is equal to 'Ja' answer this question:</i></b>                | (0.00) (100.00)                           |
| 33 |       | Hoeveel pijn heeft u wanneer u met schoenen loopt?                                                                  |                                           |
| 34 |       |                                                                                                                     |                                           |
| 35 |       |                                                                                                                     |                                           |
| 36 | 9.6   | Heeft u pijn wanneer u met schoenen staat?                                                                          | <input type="radio"/> Ja                  |
| 37 |       |                                                                                                                     | <input type="radio"/> Nee                 |
| 38 |       |                                                                                                                     | <input type="radio"/> Niet van toepassing |
| 39 |       |                                                                                                                     |                                           |
| 40 |       |                                                                                                                     |                                           |
| 41 |       |                                                                                                                     |                                           |
| 42 | 9.6.1 | <b><i>If 'Heeft u pijn wanneer u met schoenen staat?' is equal to 'Ja' answer this question:</i></b>                | (0.00) (100.00)                           |
| 43 |       | Hoeveel pijn heeft u wanneer u met schoenen staat?                                                                  |                                           |
| 44 |       |                                                                                                                     |                                           |
| 45 |       |                                                                                                                     |                                           |
| 46 | 9.7   | Heeft u pijn wanneer u loopt met steunzolen of een brace?                                                           | <input type="radio"/> Ja                  |
| 47 |       |                                                                                                                     | <input type="radio"/> Nee                 |
| 48 |       |                                                                                                                     | <input type="radio"/> Niet van toepassing |
| 49 |       |                                                                                                                     |                                           |
| 50 |       |                                                                                                                     |                                           |
| 51 |       |                                                                                                                     |                                           |
| 52 | 9.7.1 | <b><i>If 'Heeft u pijn wanneer u loopt met steunzolen of een brace?' is equal to 'Ja' answer this question:</i></b> | (0.00) (100.00)                           |
| 53 |       | Hoeveel pijn heeft u wanneer u loopt met steunzolen of een brace?                                                   |                                           |
| 54 |       |                                                                                                                     |                                           |
| 55 |       |                                                                                                                     |                                           |
| 56 |       |                                                                                                                     |                                           |
| 57 |       |                                                                                                                     |                                           |
| 58 |       |                                                                                                                     |                                           |
| 59 |       |                                                                                                                     |                                           |
| 60 |       |                                                                                                                     |                                           |

|    |        |                                                                                                              |                                           |          |
|----|--------|--------------------------------------------------------------------------------------------------------------|-------------------------------------------|----------|
| 1  |        |                                                                                                              |                                           |          |
| 2  | 9.8    | Heeft u pijn wanneer u staat met steunzolen of een brace?                                                    | <input type="radio"/> Ja                  |          |
| 3  |        |                                                                                                              | <input type="radio"/> Nee                 |          |
| 4  |        |                                                                                                              | <input type="radio"/> Niet van toepassing |          |
| 5  |        |                                                                                                              |                                           |          |
| 6  |        |                                                                                                              |                                           |          |
| 7  |        |                                                                                                              |                                           |          |
| 8  | 9.8.1  | <b>If 'Heeft u pijn wanneer u staat met steunzolen of een brace?' is equal to 'Ja' answer this question:</b> | (0.00)                                    | (100.00) |
| 9  |        | Hoeveel pijn heeft u wanneer u staat met steunzolen of een brace?                                            |                                           |          |
| 10 |        |                                                                                                              |                                           |          |
| 11 |        |                                                                                                              |                                           |          |
| 12 |        |                                                                                                              |                                           |          |
| 13 | 9.9    | Heeft u pijn aan het einde van de dag?                                                                       | <input type="radio"/> Ja                  |          |
| 14 |        |                                                                                                              | <input type="radio"/> Nee                 |          |
| 15 |        |                                                                                                              | <input type="radio"/> Niet van toepassing |          |
| 16 |        |                                                                                                              |                                           |          |
| 17 |        |                                                                                                              |                                           |          |
| 18 |        |                                                                                                              |                                           |          |
| 19 | 9.9.1  | <b>If 'Heeft u pijn aan het einde van de dag?' is equal to 'Ja' answer this question:</b>                    | (0.00)                                    | (100.00) |
| 20 |        | Hoeveel pijn heeft u aan het einde van de dag?                                                               |                                           |          |
| 21 |        |                                                                                                              |                                           |          |
| 22 |        |                                                                                                              |                                           |          |
| 23 |        | Instructies:De lijn naast elke vraag staat voor hoeveel MOEITE u heeft met verschillende activiteiten.       |                                           |          |
| 24 |        | De linker kant (0) is "Niet moeilijk" en de rechter kant (100) is "Te moeilijk, niet uitvoerbaar". Geef voor |                                           |          |
| 25 |        | de onderstaande activiteiten op de lijn aan hoeveel MOEITE u in de afgelopen week door                       |                                           |          |
| 26 |        | enkelklachten had met onderstaande activiteiten. Als een situatie niet van toepassing is, kies dan de        |                                           |          |
| 27 |        | optie "niet van toepassing".                                                                                 |                                           |          |
| 28 |        |                                                                                                              |                                           |          |
| 29 |        |                                                                                                              |                                           |          |
| 30 | 9.10   | Heeft u moeite met door het huis lopen?                                                                      | <input type="radio"/> Ja                  |          |
| 31 |        |                                                                                                              | <input type="radio"/> Nee                 |          |
| 32 |        |                                                                                                              | <input type="radio"/> Niet van toepassing |          |
| 33 |        |                                                                                                              |                                           |          |
| 34 |        |                                                                                                              |                                           |          |
| 35 | 9.10.1 | <b>If 'Heeft u moeite met door het huis lopen?' is equal to 'Ja' answer this question:</b>                   | (0.00)                                    | (100.00) |
| 36 |        | Hoeveel moeite heeft u met door het huis lopen?                                                              |                                           |          |
| 37 |        |                                                                                                              |                                           |          |
| 38 |        |                                                                                                              |                                           |          |
| 39 |        |                                                                                                              |                                           |          |
| 40 | 9.11   | Heeft u moeite met buiten lopen op oneven ondergrond?                                                        | <input type="radio"/> Ja                  |          |
| 41 |        |                                                                                                              | <input type="radio"/> Nee                 |          |
| 42 |        |                                                                                                              | <input type="radio"/> Niet van toepassing |          |
| 43 |        |                                                                                                              |                                           |          |
| 44 |        |                                                                                                              |                                           |          |
| 45 | 9.11.1 | <b>If 'Heeft u moeite met buiten lopen op oneven ondergrond?' is equal to 'Ja' answer this question:</b>     | (0.00)                                    | (100.00) |
| 46 |        | Hoeveel moeite heeft u met buiten lopen op oneven ondergrond?                                                |                                           |          |
| 47 |        |                                                                                                              |                                           |          |
| 48 |        |                                                                                                              |                                           |          |
| 49 |        |                                                                                                              |                                           |          |
| 50 |        |                                                                                                              |                                           |          |
| 51 | 9.12   | Heeft u moeite met een paar honderd meter lopen?                                                             | <input type="radio"/> Ja                  |          |
| 52 |        |                                                                                                              | <input type="radio"/> Nee                 |          |
| 53 |        |                                                                                                              | <input type="radio"/> Niet van toepassing |          |
| 54 |        |                                                                                                              |                                           |          |
| 55 |        |                                                                                                              |                                           |          |
| 56 | 9.12.1 | <b>If 'Heeft u moeite met een paar honderd meter lopen?' is equal to 'Ja' answer this question:</b>          | (0.00)                                    | (100.00) |
| 57 |        | Hoeveel moeite heeft u met een paar honderd meter lopen?                                                     |                                           |          |
| 58 |        |                                                                                                              |                                           |          |
| 59 |        |                                                                                                              |                                           |          |
| 60 |        |                                                                                                              |                                           |          |

|    |        |                                                                                                             |                                           |          |
|----|--------|-------------------------------------------------------------------------------------------------------------|-------------------------------------------|----------|
| 1  |        |                                                                                                             |                                           |          |
| 2  | 9.13   | Heeft u moeite met een trap oplopen?                                                                        | <input type="radio"/> Ja                  |          |
| 3  |        |                                                                                                             | <input type="radio"/> Nee                 |          |
| 4  |        |                                                                                                             | <input type="radio"/> Niet van toepassing |          |
| 5  |        |                                                                                                             |                                           |          |
| 6  |        |                                                                                                             |                                           |          |
| 7  |        |                                                                                                             |                                           |          |
| 8  | 9.13.1 | <b>If 'Heeft u moeite met een trap oplopen?' is equal to 'Ja' answer this question:</b>                     | (0.00)                                    | (100.00) |
| 9  |        | Hoeveel moeite heeft u met een trap oplopen?                                                                |                                           |          |
| 10 |        |                                                                                                             |                                           |          |
| 11 |        |                                                                                                             |                                           |          |
| 12 | 9.14   | Heeft u moeite met een trap aflopen?                                                                        | <input type="radio"/> Ja                  |          |
| 13 |        |                                                                                                             | <input type="radio"/> Nee                 |          |
| 14 |        |                                                                                                             | <input type="radio"/> Niet van toepassing |          |
| 15 |        |                                                                                                             |                                           |          |
| 16 |        |                                                                                                             |                                           |          |
| 17 |        |                                                                                                             |                                           |          |
| 18 | 9.14.1 | <b>If 'Heeft u moeite met een trap aflopen?' is equal to 'Ja' answer this question:</b>                     | (0.00)                                    | (100.00) |
| 19 |        | Hoeveel moeite heeft u met een trap aflopen?                                                                |                                           |          |
| 20 |        |                                                                                                             |                                           |          |
| 21 |        |                                                                                                             |                                           |          |
| 22 | 9.15   | Heeft u moeite met op de tenen staan?                                                                       | <input type="radio"/> Ja                  |          |
| 23 |        |                                                                                                             | <input type="radio"/> Nee                 |          |
| 24 |        |                                                                                                             | <input type="radio"/> Niet van toepassing |          |
| 25 |        |                                                                                                             |                                           |          |
| 26 |        |                                                                                                             |                                           |          |
| 27 |        |                                                                                                             |                                           |          |
| 28 | 9.15.1 | <b>If 'Heeft u moeite met op de tenen staan?' is equal to 'Ja' answer this question:</b>                    | (0.00)                                    | (100.00) |
| 29 |        | Hoeveel moeite heeft u met op de tenen staan?                                                               |                                           |          |
| 30 |        |                                                                                                             |                                           |          |
| 31 |        |                                                                                                             |                                           |          |
| 32 | 9.16   | Heeft u moeite met opstaan uit de stoel?                                                                    | <input type="radio"/> Ja                  |          |
| 33 |        |                                                                                                             | <input type="radio"/> Nee                 |          |
| 34 |        |                                                                                                             | <input type="radio"/> Niet van toepassing |          |
| 35 |        |                                                                                                             |                                           |          |
| 36 |        |                                                                                                             |                                           |          |
| 37 |        |                                                                                                             |                                           |          |
| 38 | 9.16.1 | <b>If 'Heeft u moeite met opstaan uit de stoel?' is equal to 'Ja' answer this question:</b>                 | (0.00)                                    | (100.00) |
| 39 |        | Hoeveel moeite heeft u met opstaan uit de stoel?                                                            |                                           |          |
| 40 |        |                                                                                                             |                                           |          |
| 41 |        |                                                                                                             |                                           |          |
| 42 | 9.17   | Heeft u moeite met het op- of afstappen van stoepranden?                                                    | <input type="radio"/> Ja                  |          |
| 43 |        |                                                                                                             | <input type="radio"/> Nee                 |          |
| 44 |        |                                                                                                             | <input type="radio"/> Niet van toepassing |          |
| 45 |        |                                                                                                             |                                           |          |
| 46 |        |                                                                                                             |                                           |          |
| 47 |        |                                                                                                             |                                           |          |
| 48 | 9.17.1 | <b>If 'Heeft u moeite met het op- of afstappen van stoepranden?' is equal to 'Ja' answer this question:</b> | (0.00)                                    | (100.00) |
| 49 |        | Hoeveel moeite heeft u met het op- of afstappen van stoepranden?                                            |                                           |          |
| 50 |        |                                                                                                             |                                           |          |
| 51 |        |                                                                                                             |                                           |          |
| 52 |        |                                                                                                             |                                           |          |
| 53 |        |                                                                                                             |                                           |          |
| 54 | 9.18   | Heeft u moeite met snel lopen of rennen?                                                                    | <input type="radio"/> Ja                  |          |
| 55 |        |                                                                                                             | <input type="radio"/> Nee                 |          |
| 56 |        |                                                                                                             | <input type="radio"/> Niet van toepassing |          |
| 57 |        |                                                                                                             |                                           |          |
| 58 |        |                                                                                                             |                                           |          |
| 59 |        |                                                                                                             |                                           |          |
| 60 |        |                                                                                                             |                                           |          |

9.18.1 ***If 'Heeft u moeite met snel lopen of rennen?' is equal to 'Ja' answer this question:*** (0.00) (100.00)  
 Hoeveel moeite heeft u met snel lopen of rennen?

## Vragenlijst PRIMA studie 52 weken - FAOS

| Number | Question                                                                                                                                                                                                                                                                                                                                                                                                                                                                                                                                                                            | Answers                                                                                                                                                    |
|--------|-------------------------------------------------------------------------------------------------------------------------------------------------------------------------------------------------------------------------------------------------------------------------------------------------------------------------------------------------------------------------------------------------------------------------------------------------------------------------------------------------------------------------------------------------------------------------------------|------------------------------------------------------------------------------------------------------------------------------------------------------------|
|        | Deze lijst vraagt naar uw mening over uw voet/enkel. Uw antwoorden geven ons een beeld van uw voet/enkel klachten en hoe u in staat bent om alledaagse activiteiten uit te voeren in uw huidige situatie. Beantwoorden van een vraag doet u door het aanklikken van een vakje met het volgens u meest juiste antwoord (één vakje per vraag). Als u niet zeker weet hoe u een vraag moet beantwoorden, geeft u dan het antwoord dat volgens u het meest op uw situatie van toepassing is. Deze vraag heeft betrekking op het voorkomen van voet/enkel klachten in de afgelopen week. |                                                                                                                                                            |
| 10.1   | Is uw voet/enkel gezwollen?                                                                                                                                                                                                                                                                                                                                                                                                                                                                                                                                                         | <input type="radio"/> Nooit <input type="radio"/> Zelden <input type="radio"/> Soms <input type="radio"/> Vaak <input type="radio"/> Altijd                |
| 10.2   | Voelt u gekraak of hoort u klikken of een ander vreemd geluid wanneer u de voet/enkel beweegt?                                                                                                                                                                                                                                                                                                                                                                                                                                                                                      | <input type="radio"/> Nooit <input type="radio"/> Zelden <input type="radio"/> Soms <input type="radio"/> Vaak <input type="radio"/> Altijd                |
| 10.3   | Hapert uw enkel of blokkeert uw enkel ('op slot' gaan zitten) wanneer u deze beweegt?                                                                                                                                                                                                                                                                                                                                                                                                                                                                                               | <input type="radio"/> Nooit <input type="radio"/> Zelden <input type="radio"/> Soms <input type="radio"/> Vaak <input type="radio"/> Altijd                |
| 10.4   | Kunt u de voet/enkel volledig strekken?                                                                                                                                                                                                                                                                                                                                                                                                                                                                                                                                             | <input type="radio"/> Altijd <input type="radio"/> Vaak <input type="radio"/> Soms <input type="radio"/> Zelden <input type="radio"/> Nooit                |
| 10.5   | Kunt u de voet volledig naar u toe buigen?                                                                                                                                                                                                                                                                                                                                                                                                                                                                                                                                          | <input type="radio"/> Altijd <input type="radio"/> Vaak <input type="radio"/> Soms <input type="radio"/> Zelden <input type="radio"/> Nooit                |
| 10.6   | In welke mate heeft u een stijf gevoel in de voet/enkel 's ochtends bij het wakker worden?                                                                                                                                                                                                                                                                                                                                                                                                                                                                                          | <input type="radio"/> Niet Ernstig <input type="radio"/> Mild <input type="radio"/> Matig <input type="radio"/> Zeer ernstig                               |
| 10.7   | In welke mate heeft u een stijf gevoel in de voet/enkel na zitten, liggen of rusten later op de dag?                                                                                                                                                                                                                                                                                                                                                                                                                                                                                | <input type="radio"/> Niet Ernstig <input type="radio"/> Mild <input type="radio"/> Matig <input type="radio"/> Zeer ernstig                               |
| 10.8   | Hoe vaak heeft u pijn in uw voet/enkel?                                                                                                                                                                                                                                                                                                                                                                                                                                                                                                                                             | <input type="radio"/> Nooit <input type="radio"/> Maandelijks <input type="radio"/> Wekelijks <input type="radio"/> Dagelijks <input type="radio"/> Altijd |

1  
2  
3  
4  
5  
6  
7  
8  
9

---

10.9 Hoeveel voet/enkel pijn heeft u gehad in de afgelopen week bij draaien als uw voet/enkel op de grond staat?

Geen  
 Mild  
 Matig  
 Ernstig  
 Zeer ernstig

---

10  
11  
12  
13  
14  
15  
16  
17  
18

---

10.10 Hoeveel voet/enkel pijn heeft u gehad in de afgelopen week bij het volledig uitstrekken van de voet/enkel?

Geen  
 Mild  
 Matig  
 Ernstig  
 Zeer ernstig

---

19  
20  
21  
22  
23  
24  
25  
26

---

10.11 Hoeveel voet/enkel pijn heeft u gehad in de afgelopen week bij het volledig naar u toe buigen/optrekken van de voet/enkel

Geen  
 Mild  
 Matig  
 Ernstig  
 Zeer ernstig

---

27  
28  
29  
30  
31  
32  
33  
34

---

10.12 Hoeveel voet/enkel pijn heeft u gehad in de afgelopen week bij het lopen op een vlakke ondergrond

Geen  
 Mild  
 Matig  
 Ernstig  
 Zeer ernstig

---

35  
36  
37  
38  
39  
40  
41  
42  
43

---

10.13 Hoeveel voet/enkel pijn heeft u gehad in de afgelopen week bij het trap op- en trap af lopen?

Geen  
 Mild  
 Matig  
 Ernstig  
 Zeer ernstig

---

44  
45  
46  
47  
48  
49  
50  
51

---

10.14 Hoeveel voet/enkel pijn heeft u gehad in de afgelopen week 's nachts in bed?

Geen  
 Mild  
 Matig  
 Ernstig  
 Zeer ernstig

---

52  
53  
54  
55  
56  
57  
58  
59  
60

---

10.15 Hoeveel voet/enkel pijn heeft u gehad in de afgelopen week bij het zitten of liggen?

Geen  
 Mild  
 Matig  
 Ernstig  
 Zeer ernstig

---

|    |       |                                                                                                                        |                                    |                                    |
|----|-------|------------------------------------------------------------------------------------------------------------------------|------------------------------------|------------------------------------|
| 1  |       |                                                                                                                        |                                    |                                    |
| 2  | 10.16 | Hoeveel voet/enkel pijn heeft u gehad in de afgelopen week bij het rechtop staan?                                      | <input type="radio"/> Geen         |                                    |
| 3  |       |                                                                                                                        | <input type="radio"/> Mild         |                                    |
| 4  |       |                                                                                                                        | <input type="radio"/> Matig        |                                    |
| 5  |       |                                                                                                                        | <input type="radio"/> Ernstig      |                                    |
| 6  |       |                                                                                                                        | <input type="radio"/> Zeer ernstig |                                    |
| 7  |       |                                                                                                                        |                                    |                                    |
| 8  |       |                                                                                                                        |                                    |                                    |
| 9  |       |                                                                                                                        |                                    |                                    |
| 10 | 10.17 | In welke mate werd u gehinderd bij het trap aflopen?                                                                   | <input type="radio"/> Niet         | <input type="radio"/> Mild         |
| 11 |       |                                                                                                                        | <input type="radio"/> Matig        | <input type="radio"/>              |
| 12 |       |                                                                                                                        | Ernstig                            | <input type="radio"/> Zeer ernstig |
| 13 |       |                                                                                                                        |                                    |                                    |
| 14 |       |                                                                                                                        |                                    |                                    |
| 15 | 10.18 | In welke mate werd u gehinderd bij het trap op lopen?                                                                  | <input type="radio"/> Niet         | <input type="radio"/> Mild         |
| 16 |       |                                                                                                                        | <input type="radio"/> Matig        | <input type="radio"/>              |
| 17 |       |                                                                                                                        | Ernstig                            | <input type="radio"/> Zeer ernstig |
| 18 |       |                                                                                                                        |                                    |                                    |
| 19 | 10.19 | In welke mate werd u gehinderd als u vanuit een zittende positie ging staan?                                           | <input type="radio"/> Niet         | <input type="radio"/> Mild         |
| 20 |       |                                                                                                                        | <input type="radio"/> Matig        | <input type="radio"/>              |
| 21 |       |                                                                                                                        | Ernstig                            | <input type="radio"/> Zeer ernstig |
| 22 |       |                                                                                                                        |                                    |                                    |
| 23 |       |                                                                                                                        |                                    |                                    |
| 24 | 10.20 | In welke mate werd u gehinderd bij het staan?                                                                          | <input type="radio"/> Niet         | <input type="radio"/> Mild         |
| 25 |       |                                                                                                                        | <input type="radio"/> Matig        | <input type="radio"/>              |
| 26 |       |                                                                                                                        | Ernstig                            | <input type="radio"/> Zeer ernstig |
| 27 |       |                                                                                                                        |                                    |                                    |
| 28 | 10.21 | In welke mate werd u gehinderd bij het naar de grond buigen/iets oprapen?                                              | <input type="radio"/> Niet         | <input type="radio"/> Mild         |
| 29 |       |                                                                                                                        | <input type="radio"/> Matig        | <input type="radio"/>              |
| 30 |       |                                                                                                                        | Ernstig                            | <input type="radio"/> Zeer ernstig |
| 31 |       |                                                                                                                        |                                    |                                    |
| 32 | 10.22 | In welke mate werd u gehinderd bij het lopen op een vlakke ondergrond?                                                 | <input type="radio"/> Niet         | <input type="radio"/> Mild         |
| 33 |       |                                                                                                                        | <input type="radio"/> Matig        | <input type="radio"/>              |
| 34 |       |                                                                                                                        | Ernstig                            | <input type="radio"/> Zeer ernstig |
| 35 |       |                                                                                                                        |                                    |                                    |
| 36 |       |                                                                                                                        |                                    |                                    |
| 37 | 10.23 | In welke mate werd u gehinderd bij het in- en uit de auto stappen?                                                     | <input type="radio"/> Niet         | <input type="radio"/> Mild         |
| 38 |       |                                                                                                                        | <input type="radio"/> Matig        | <input type="radio"/>              |
| 39 |       |                                                                                                                        | Ernstig                            | <input type="radio"/> Zeer ernstig |
| 40 |       |                                                                                                                        |                                    |                                    |
| 41 | 10.24 | In welke mate werd u gehinderd bij het boodschappen doen?                                                              | <input type="radio"/> Niet         | <input type="radio"/> Mild         |
| 42 |       |                                                                                                                        | <input type="radio"/> Matig        | <input type="radio"/>              |
| 43 |       |                                                                                                                        | Ernstig                            | <input type="radio"/> Zeer ernstig |
| 44 |       |                                                                                                                        |                                    |                                    |
| 45 | 10.25 | In welke mate werd u gehinderd bij sokken/panty's aantrekken?                                                          | <input type="radio"/> Niet         | <input type="radio"/> Mild         |
| 46 |       |                                                                                                                        | <input type="radio"/> Matig        | <input type="radio"/>              |
| 47 |       |                                                                                                                        | Ernstig                            | <input type="radio"/> Zeer ernstig |
| 48 |       |                                                                                                                        |                                    |                                    |
| 49 |       |                                                                                                                        |                                    |                                    |
| 50 | 10.26 | In welke mate werd u gehinderd bij het opstaan uit bed?                                                                | <input type="radio"/> Niet         | <input type="radio"/> Mild         |
| 51 |       |                                                                                                                        | <input type="radio"/> Matig        | <input type="radio"/>              |
| 52 |       |                                                                                                                        | Ernstig                            | <input type="radio"/> Zeer ernstig |
| 53 |       |                                                                                                                        |                                    |                                    |
| 54 | 10.27 | In welke mate werd u gehinderd bij het sokken uittrekken?                                                              | <input type="radio"/> Niet         | <input type="radio"/> Mild         |
| 55 |       |                                                                                                                        | <input type="radio"/> Matig        | <input type="radio"/>              |
| 56 |       |                                                                                                                        | Ernstig                            | <input type="radio"/> Zeer ernstig |
| 57 |       |                                                                                                                        |                                    |                                    |
| 58 |       |                                                                                                                        |                                    |                                    |
| 59 | 10.28 | In welke mate werd u gehinderd bij het in bed liggen (omdraaien, lange tijd uw voet/enkel in dezelfde positie houden)? | <input type="radio"/> Niet         | <input type="radio"/> Mild         |
| 60 |       |                                                                                                                        | <input type="radio"/> Matig        | <input type="radio"/>              |
|    |       |                                                                                                                        | Ernstig                            | <input type="radio"/> Zeer ernstig |

|    |       |                                                        |                                  |                                    |
|----|-------|--------------------------------------------------------|----------------------------------|------------------------------------|
| 1  |       |                                                        |                                  |                                    |
| 2  | 10.29 | In welke mate werd u gehinderd bij het in/uit bad      | <input type="radio"/> Niet       | <input type="radio"/> Mild         |
| 3  |       | stappen?                                               | <input type="radio"/> Matig      | <input type="radio"/>              |
| 4  |       |                                                        | Ernstig                          | <input type="radio"/> Zeer ernstig |
| 5  |       |                                                        |                                  |                                    |
| 6  | 10.30 | In welke mate werd u gehinderd bij zitten?             | <input type="radio"/> Niet       | <input type="radio"/> Mild         |
| 7  |       |                                                        | Ernstig                          | <input type="radio"/> Zeer ernstig |
| 8  |       |                                                        |                                  |                                    |
| 9  |       |                                                        |                                  |                                    |
| 10 |       |                                                        |                                  |                                    |
| 11 | 10.31 | In welke mate werd u gehinderd bij het toilet op en af | <input type="radio"/> Niet       | <input type="radio"/> Mild         |
| 12 |       | gaan?                                                  | Ernstig                          | <input type="radio"/> Zeer ernstig |
| 13 |       |                                                        |                                  |                                    |
| 14 |       |                                                        |                                  |                                    |
| 15 | 10.32 | In welke mate werd u gehinderd bij zwaar               | <input type="radio"/> Niet       | <input type="radio"/> Mild         |
| 16 |       | huishoudelijk werk (bijvoorbeeld zware dozen sjouwen,  | Ernstig                          | <input type="radio"/> Zeer ernstig |
| 17 |       | vloer schrobben)?                                      |                                  |                                    |
| 18 |       |                                                        |                                  |                                    |
| 19 |       |                                                        |                                  |                                    |
| 20 | 10.33 | In welke mate werd u gehinderd bij licht huishoudelijk | <input type="radio"/> Niet       | <input type="radio"/> Mild         |
| 21 |       | werk (bijvoorbeeld koken, afstoffen)?                  | Ernstig                          | <input type="radio"/> Zeer ernstig |
| 22 |       |                                                        |                                  |                                    |
| 23 |       |                                                        |                                  |                                    |
| 24 | 10.34 | In welke mate werd u gehinderd bij hurken?             | <input type="radio"/> Niet       | <input type="radio"/> Mild         |
| 25 |       |                                                        | Ernstig                          | <input type="radio"/> Zeer ernstig |
| 26 |       |                                                        |                                  |                                    |
| 27 |       |                                                        |                                  |                                    |
| 28 |       |                                                        |                                  |                                    |
| 29 | 10.35 | In welke mate werd u gehinderd bij hardlopen?          | <input type="radio"/> Niet       | <input type="radio"/> Mild         |
| 30 |       |                                                        | Ernstig                          | <input type="radio"/> Zeer ernstig |
| 31 |       |                                                        |                                  |                                    |
| 32 |       |                                                        |                                  |                                    |
| 33 | 10.36 | In welke mate werd u gehinderd bij springen?           | <input type="radio"/> Niet       | <input type="radio"/> Mild         |
| 34 |       |                                                        | Ernstig                          | <input type="radio"/> Zeer ernstig |
| 35 |       |                                                        |                                  |                                    |
| 36 |       |                                                        |                                  |                                    |
| 37 | 10.37 | In welke mate werd u gehinderd bij ronddraaien op uw   | <input type="radio"/> Niet       | <input type="radio"/> Mild         |
| 38 |       | aangedane voet/enkel?                                  | Ernstig                          | <input type="radio"/> Zeer ernstig |
| 39 |       |                                                        |                                  |                                    |
| 40 |       |                                                        |                                  |                                    |
| 41 |       |                                                        |                                  |                                    |
| 42 | 10.38 | In welke mate werd u gehinderd bij knielen?            | <input type="radio"/> Niet       | <input type="radio"/> Mild         |
| 43 |       |                                                        | Ernstig                          | <input type="radio"/> Zeer ernstig |
| 44 |       |                                                        |                                  |                                    |
| 45 |       |                                                        |                                  |                                    |
| 46 | 10.39 | Hoe vaak bent u zich bewust van uw voet/enkel          | <input type="radio"/> Nooit      | <input type="radio"/> Maandelijks  |
| 47 |       | probleem?                                              | Wekelijks                        | <input type="radio"/> Dagelijks    |
| 48 |       |                                                        |                                  | <input type="radio"/> Altijd       |
| 49 |       |                                                        |                                  |                                    |
| 50 | 10.40 | Heeft u uw leven veranderd om activiteiten te          | <input type="radio"/> Niet       |                                    |
| 51 |       | vermijden die schadelijk kunnen zijn voor uw           | <input type="radio"/> Enigszins  |                                    |
| 52 |       | voet/enkel?                                            | <input type="radio"/> Matig      |                                    |
| 53 |       |                                                        | <input type="radio"/> Behoorlijk |                                    |
| 54 |       |                                                        | <input type="radio"/> Volledig   |                                    |
| 55 |       |                                                        |                                  |                                    |
| 56 |       |                                                        |                                  |                                    |
| 57 |       |                                                        |                                  |                                    |
| 58 |       |                                                        |                                  |                                    |
| 59 |       |                                                        |                                  |                                    |
| 60 |       |                                                        |                                  |                                    |



1  
2  
3  
4  
5  
6  
7  
8  
9

10.41 In hoeverre kunt u op uw voet/enkel vertrouwen?

Volledig  
 Behoorlijk  
 Matig  
 Enigzins  
 Niet

10  
11  
12  
13  
14  
15  
16  
17  
18  
19  
20  
21  
22

10.42 In het algemeen, in welke mate ondervindt u hinder van uw voet/enkel

Geen  
 Mild  
 Matig  
 Ernstig  
 Zeer ernstig

23  
24  
25  
26

## Vragenlijst PRIMA studie 52 weken - PRODISQ - Gezondheid en werk

| Number | Question                                                                                                                                                                                                                                                                    | Answers                                                                                                                                                                                                                                                                                                                                                                                                                                                                                                                                                                |
|--------|-----------------------------------------------------------------------------------------------------------------------------------------------------------------------------------------------------------------------------------------------------------------------------|------------------------------------------------------------------------------------------------------------------------------------------------------------------------------------------------------------------------------------------------------------------------------------------------------------------------------------------------------------------------------------------------------------------------------------------------------------------------------------------------------------------------------------------------------------------------|
| 11.1   | Wat is uw leeftijd?                                                                                                                                                                                                                                                         | <input type="text"/> jaar                                                                                                                                                                                                                                                                                                                                                                                                                                                                                                                                              |
| 11.2   | Wat is uw geslacht?                                                                                                                                                                                                                                                         | <input type="radio"/> Man<br><input type="radio"/> Vrouw                                                                                                                                                                                                                                                                                                                                                                                                                                                                                                               |
| 11.3   | Wat is de hoogste opleiding die u heeft afgemaakt (Zoek uw hoogste opleiding en kruis het hokje daarvoor aan)?                                                                                                                                                              | <input type="checkbox"/> Ik heb geen school of opleiding afgemaakt<br><input type="checkbox"/> Lagere school of basisschool<br><input type="checkbox"/> Huishoudschool, vbo, lbo, lts, leao of lhno<br><input type="checkbox"/> Mavo, mulo, ivo of vmbo<br><input type="checkbox"/> Mbo, mts, meao, mhno, inas of intas<br><input type="checkbox"/> Havo, vwo, hbs, mms, atheneum of gymnasium<br><input type="checkbox"/> Hbo, hts, heao of hhno<br><input type="checkbox"/> Universiteit<br><input type="checkbox"/> Ik heb een andere opleiding afgemaakt, namelijk |
| 11.3.1 | <b><i>If 'Wat is de hoogste opleiding die u heeft afgemaakt (Zoek uw hoogste opleiding en kruis het hokje daarvoor aan)?' is equal to 'Ik heb een andere opleiding afgemaakt, namelijk' answer this question:</i></b><br>Wat is de hoogste opleiding die u heeft afgemaakt? | <input type="text"/>                                                                                                                                                                                                                                                                                                                                                                                                                                                                                                                                                   |

27  
28  
29  
30  
31  
32  
33  
34  
35  
36  
37  
38  
39  
40  
41  
42  
43  
44  
45  
46  
47  
48  
49  
50  
51  
52  
53  
54  
55  
56  
57  
58  
59  
60

- 1  
2  
3  
4  
5  
6  
7  
8  
9  
10  
11  
12  
13
- 11.4 Wat doet u in het dagelijks leven?
- Ik zit op school, ik studeer
- Ik werk in loondienst
- Ik ben zelfstandig ondernemer
- Ik ben huisvrouw, huisman
- Ik ben werkloos
- Ik ben arbeidsongeschikt
- Ik ben met pensioen of prepensioen
- Ik doe iets anders, namelijk

14  
15  
16  
17

11.4.1 ***If 'Wat doet u in het dagelijks leven?' is equal to 'Ik ben arbeidsongeschikt' answer this question:***

Wat doet u in het dagelijks leven?

18  
19  
20  
21  
22  
23

11.4.2 ***If 'Wat doet u in het dagelijks leven?' is equal to 'Ik doe iets anders, namelijk' answer this question:***

Wat doet u in het dagelijks leven?

24  
25  
26  
27  
28

11.5 Hebt u betaald werk?

Nee

Ja

29  
30  
31  
32

11.5.1 ***If 'Hebt u betaald werk?' is equal to 'Ja' answer this question:***

Wat is uw beroep?

33  
34  
35  
36  
37

11.5.2 ***If 'Hebt u betaald werk?' is equal to 'Ja' answer this question:***

Hoeveel uur per week werkt u (Tel alleen de uren waarvoor u betaald wordt)?

 uren

38  
39  
40  
41  
42

11.5.3 ***If 'Hebt u betaald werk?' is equal to 'Ja' answer this question:***

Hoeveel dagen in de week werkt u?

 Dagen

43  
44  
45  
46  
47

11.5.4 ***If 'Hebt u betaald werk?' is equal to 'Ja' answer this question:***

Bent u in de afgelopen 4 weken afwezig geweest van uw werk omdat u ziek was?

Nee

Ja

48  
49  
50  
51  
52  
53  
54

11.5.4.1 ***If 'Bent u in de afgelopen 4 weken afwezig geweest van uw werk omdat u ziek was?' is equal to 'Ja' answer this question:***

Bent u in de afgelopen 4 weken afwezig geweest van uw werk omdat u ziek was (Tel alleen de werkdagen in de afgelopen 4 weken)?

 dagen afwezig geweest

55  
56  
57  
58  
59  
60

11.5.4.2 ***If 'Bent u in de afgelopen 4 weken afwezig geweest van uw werk omdat u ziek was?' is equal to 'Ja' answer this question:***

Was u langer dan de gehele periode van 4 weken afwezig van uw werk doordat u ziek was?

Nee

Ja

|            |                                                                                                                                                                                                                                                                                                                                                                                                                 |                                                                             |                                            |
|------------|-----------------------------------------------------------------------------------------------------------------------------------------------------------------------------------------------------------------------------------------------------------------------------------------------------------------------------------------------------------------------------------------------------------------|-----------------------------------------------------------------------------|--------------------------------------------|
| 11.5.4.2.1 | <b>If 'Was u langer dan de gehele periode van 4 weken afwezig van uw werk doordat u ziek was?' is equal to 'Ja' answer this question:</b><br>Wanneer heeft u zich ziek gemeld?                                                                                                                                                                                                                                  | <input type="text"/> <input type="text"/> <input type="text"/> (dd-mm-yyyy) |                                            |
| 11.5.5     | <b>If 'Hebt u betaald werk?' is equal to 'Ja' answer this question:</b><br>Waren er in de afgelopen 4 weken, dagen waarop u wel gewerkt heeft, maar tijdens uw werk last had van lichamelijke of psychische problemen?                                                                                                                                                                                          | <input type="radio"/> Ja<br><input type="radio"/> Nee                       |                                            |
| 11.5.5.1   | <b>If 'Waren er in de afgelopen 4 weken, dagen waarop u wel gewerkt heeft, maar tijdens uw werk last had van lichamelijke of psychische problemen?' is equal to 'Ja' answer this question:</b><br>Op hoeveel werkdagen had u tijdens uw werk last van uw lichamelijke of psychische problemen?                                                                                                                  | <input type="text"/> werkdagen                                              |                                            |
| 11.5.5.2   | <b>If 'Waren er in de afgelopen 4 weken, dagen waarop u wel gewerkt heeft, maar tijdens uw werk last had van lichamelijke of psychische problemen?' is equal to 'Ja' answer this question:</b><br>Op de dagen dat u last had, kon u misschien niet zoveel werk doen als normaal. Hoeveel werk kon u op deze dagen gemiddeld doen?                                                                               | Ik kon op deze dagen niks doen (0.00)                                       | Ik kon net zoveel doen als normaal (10.00) |
| 11.6       | Waren er dagen waarop u minder onbetaald werk kon doen door uw lichamelijke of psychische problemen?                                                                                                                                                                                                                                                                                                            | <input type="radio"/> Nee<br><input type="radio"/> Ja                       |                                            |
| 11.6.1     | <b>If 'Waren er dagen waarop u minder onbetaald werk kon doen door uw lichamelijke of psychische problemen?' is equal to 'Ja' answer this question:</b><br>Op hoeveel dagen was dit zo?                                                                                                                                                                                                                         | <input type="text"/> Dagen                                                  |                                            |
| 11.6.2     | <b>If 'Waren er dagen waarop u minder onbetaald werk kon doen door uw lichamelijke of psychische problemen?' is equal to 'Ja' answer this question:</b><br>Stel dat iemand, bijvoorbeeld uw partner, familielid of een bekende, u op deze dagen had geholpen. En al het onbetaalde werk wat u niet kon doen, voor u had gedaan. Hoeveel uur was die persoon hier op deze dagen dan gemiddeld mee bezig geweest? | <input type="text"/> uur op deze dagen                                      |                                            |

## Vragenlijst PRIMA studie 52 weken - PRODISQ - Zorggebruik

| Number | Question | Answers |
|--------|----------|---------|
|--------|----------|---------|

Wij willen graag weten met welke dokters u in de afgelopen 3 maanden een afspraak had. Het gaat om afspraken voor uzelf. Ook andere zorgverleners tellen mee. Bijvoorbeeld de fysiotherapeut.

1  
2  
3  
4  
5  
6  
7  
8  
9  
10  
11  
12  
13  
14  
15  
16  
17  
18  
19  
20  
21  
22  
23  
24  
25  
26  
27  
28  
29  
30  
31  
32  
33  
34  
35  
36  
37  
38  
39  
40  
41  
42  
43  
44  
45  
46  
47  
48  
49  
50  
51  
52  
53  
54  
55  
56  
57  
58  
59  
60

|        |                                                                                                                                                                                                                                 |                                                       |
|--------|---------------------------------------------------------------------------------------------------------------------------------------------------------------------------------------------------------------------------------|-------------------------------------------------------|
| 12.1   | Bent u in de afgelopen 3 maanden naar uw huisarts geweest?                                                                                                                                                                      | <input type="radio"/> Nee<br><input type="radio"/> Ja |
| 12.1.1 | <b><i>If 'Bent u in de afgelopen 3 maanden naar uw huisarts geweest?' is equal to 'Ja' answer this question:</i></b><br>Hoeveel afspraken had u?                                                                                | <input type="text"/> afspraken                        |
| 12.2   | Bent u in de afgelopen 3 maanden in contact geweest met een maatschappelijk werker?                                                                                                                                             | <input type="radio"/> Nee<br><input type="radio"/> Ja |
| 12.2.1 | <b><i>If 'Bent u in de afgelopen 3 maanden in contact geweest met een maatschappelijk werker?' is equal to 'Ja' answer this question:</i></b><br>Hoeveel afspraken had u?                                                       | <input type="text"/> afspraken                        |
| 12.3   | Bent u in de afgelopen 3 maanden naar een fysiotherapeut geweest? Of een caesartherapeut, therapeut mensendieck of een manueel therapeut?                                                                                       | <input type="radio"/> Nee<br><input type="radio"/> Ja |
| 12.3.1 | <b><i>If 'Bent u in de afgelopen 3 maanden naar een fysiotherapeut geweest? Of een caesartherapeut, therapeut mensendieck of een manueel therapeut?' is equal to 'Ja' answer this question:</i></b><br>Hoeveel afspraken had u? | <input type="text"/> afspraken                        |
| 12.4   | Bent u in de afgelopen 3 maanden naar een ergotherapeut geweest?                                                                                                                                                                | <input type="radio"/> Nee<br><input type="radio"/> Ja |
| 12.4.1 | <b><i>If 'Bent u in de afgelopen 3 maanden naar een ergotherapeut geweest?' is equal to 'Ja' answer this question:</i></b><br>Hoeveel afspraken had u?                                                                          | <input type="text"/> afspraken                        |
| 12.5   | Bent u in de afgelopen 3 maanden naar een logopedist geweest?                                                                                                                                                                   | <input type="radio"/> Nee<br><input type="radio"/> Ja |
| 12.5.1 | <b><i>If 'Bent u in de afgelopen 3 maanden naar een logopedist geweest?' is equal to 'Ja' answer this question:</i></b><br>Hoeveel afspraken had u?                                                                             | <input type="text"/> afspraken                        |
| 12.6   | Bent u in de afgelopen 3 maanden naar een diëtist geweest?                                                                                                                                                                      | <input type="radio"/> Nee<br><input type="radio"/> Ja |
| 12.6.1 | <b><i>If 'Bent u in de afgelopen 3 maanden naar een diëtist geweest?' is equal to 'Ja' answer this question:</i></b><br>Hoeveel afspraken had u?                                                                                | <input type="text"/> afspraken                        |

|    |           |                                                                                                                                                                                                    |                                                                                                     |
|----|-----------|----------------------------------------------------------------------------------------------------------------------------------------------------------------------------------------------------|-----------------------------------------------------------------------------------------------------|
| 1  |           |                                                                                                                                                                                                    |                                                                                                     |
| 2  | 12.7      | Bent u in de afgelopen 3 maanden naar een homeopaat geweest? Of een acupuncturist?                                                                                                                 | <input type="radio"/> Nee                                                                           |
| 3  |           |                                                                                                                                                                                                    | <input type="radio"/> Ja                                                                            |
| 4  |           |                                                                                                                                                                                                    |                                                                                                     |
| 5  |           |                                                                                                                                                                                                    |                                                                                                     |
| 6  | 12.7.1    | <b>If 'Bent u in de afgelopen 3 maanden naar een homeopaat geweest? Of een acupuncturist?' is equal to 'Ja' answer this question:</b>                                                              | <input type="text"/> afspraken                                                                      |
| 7  |           | Hoeveel afspraken had u?                                                                                                                                                                           |                                                                                                     |
| 8  |           |                                                                                                                                                                                                    |                                                                                                     |
| 9  |           |                                                                                                                                                                                                    |                                                                                                     |
| 10 |           |                                                                                                                                                                                                    |                                                                                                     |
| 11 |           |                                                                                                                                                                                                    |                                                                                                     |
| 12 | 12.8      | Bent u in de afgelopen 3 maanden naar een psycholoog geweest? Of een psychotherapeut of psychiater?                                                                                                | <input type="radio"/> Nee                                                                           |
| 13 |           |                                                                                                                                                                                                    | <input type="radio"/> Ja                                                                            |
| 14 |           |                                                                                                                                                                                                    |                                                                                                     |
| 15 |           |                                                                                                                                                                                                    |                                                                                                     |
| 16 | 12.8.1    | <b>If 'Bent u in de afgelopen 3 maanden naar een psycholoog geweest? Of een psychotherapeut of psychiater?' is equal to 'Ja' answer this question:</b>                                             | <input type="text"/> afspraken                                                                      |
| 17 |           | Hoeveel afspraken had u?                                                                                                                                                                           |                                                                                                     |
| 18 |           |                                                                                                                                                                                                    |                                                                                                     |
| 19 |           |                                                                                                                                                                                                    |                                                                                                     |
| 20 |           |                                                                                                                                                                                                    |                                                                                                     |
| 21 |           |                                                                                                                                                                                                    |                                                                                                     |
| 22 | 12.9      | Heeft u in de afgelopen 3 maanden afspraken gehad met de bedrijfsarts?                                                                                                                             | <input type="radio"/> Nee                                                                           |
| 23 |           |                                                                                                                                                                                                    | <input type="radio"/> Ja                                                                            |
| 24 |           |                                                                                                                                                                                                    |                                                                                                     |
| 25 |           |                                                                                                                                                                                                    |                                                                                                     |
| 26 | 12.9.1    | <b>If 'Heeft u in de afgelopen 3 maanden afspraken gehad met de bedrijfsarts?' is equal to 'Ja' answer this question:</b>                                                                          | <input type="text"/> afspraken                                                                      |
| 27 |           | Hoeveel afspraken had u?                                                                                                                                                                           |                                                                                                     |
| 28 |           |                                                                                                                                                                                                    |                                                                                                     |
| 29 |           |                                                                                                                                                                                                    |                                                                                                     |
| 30 |           |                                                                                                                                                                                                    |                                                                                                     |
| 31 |           |                                                                                                                                                                                                    |                                                                                                     |
| 32 | 12.10     | Heeft u in de afgelopen 3 maanden hulp van de thuiszorg gehad?                                                                                                                                     | <input type="radio"/> Ja                                                                            |
| 33 |           |                                                                                                                                                                                                    | <input type="radio"/> Nee                                                                           |
| 34 |           |                                                                                                                                                                                                    |                                                                                                     |
| 35 |           |                                                                                                                                                                                                    |                                                                                                     |
| 36 | 12.10.1   | <b>If 'Heeft u in de afgelopen 3 maanden hulp van de thuiszorg gehad?' is equal to 'Ja' answer this question:</b>                                                                                  | <input type="checkbox"/> Huishoudelijke hulp; voorbeeld: stofzuigen, bed opmaken, boodschappen doen |
| 37 |           | Wat voor hulp van de thuiszorg heeft u gehad in de afgelopen 3 maanden?                                                                                                                            | <input type="checkbox"/> Verzorging van uzelf; voorbeeld: hulp bij douchen of aankleden             |
| 38 |           |                                                                                                                                                                                                    | <input type="checkbox"/> Verpleging; voorbeeld: verband omdoen, medicijnen geven, bloeddruk meten   |
| 39 |           |                                                                                                                                                                                                    |                                                                                                     |
| 40 |           |                                                                                                                                                                                                    |                                                                                                     |
| 41 |           |                                                                                                                                                                                                    |                                                                                                     |
| 42 |           |                                                                                                                                                                                                    |                                                                                                     |
| 43 |           |                                                                                                                                                                                                    |                                                                                                     |
| 44 |           |                                                                                                                                                                                                    |                                                                                                     |
| 45 |           |                                                                                                                                                                                                    |                                                                                                     |
| 46 |           |                                                                                                                                                                                                    |                                                                                                     |
| 47 | 12.10.1.1 | <b>If 'Wat voor hulp van de thuiszorg heeft u gehad in de afgelopen 3 maanden?' is equal to 'Huishoudelijke hulp; voorbeeld: stofzuigen, bed opmaken, boodschappen doen' answer this question:</b> | <input type="text"/> weken in de afgelopen 3 maanden                                                |
| 48 |           | Hoeveel weken heeft u deze thuiszorg gehad?                                                                                                                                                        |                                                                                                     |
| 49 |           | Huishoudelijke hulp:                                                                                                                                                                               |                                                                                                     |
| 50 |           |                                                                                                                                                                                                    |                                                                                                     |
| 51 |           |                                                                                                                                                                                                    |                                                                                                     |
| 52 |           |                                                                                                                                                                                                    |                                                                                                     |
| 53 |           |                                                                                                                                                                                                    |                                                                                                     |
| 54 |           |                                                                                                                                                                                                    |                                                                                                     |
| 55 |           |                                                                                                                                                                                                    |                                                                                                     |
| 56 | 12.10.1.2 | <b>If 'Wat voor hulp van de thuiszorg heeft u gehad in de afgelopen 3 maanden?' is equal to 'Verzorging van uzelf; voorbeeld: hulp bij douchen of aankleden' answer this question:</b>             | <input type="text"/> weken in de afgelopen 3 maanden                                                |
| 57 |           | Hoeveel weken heeft u deze thuiszorg gehad?                                                                                                                                                        |                                                                                                     |
| 58 |           | Verzorging van uzelf:                                                                                                                                                                              |                                                                                                     |
| 59 |           |                                                                                                                                                                                                    |                                                                                                     |
| 60 |           |                                                                                                                                                                                                    |                                                                                                     |

- 1  
2  
3  
4  
5  
6  
7  
8
- 12.10.1.3 **If 'Wat voor hulp van de thuiszorg heeft u gehad in de afgelopen 3 maanden?' is equal to 'Verpleging; voorbeeld: verband omdoen, medicijnen geven, bloeddruk meten' answer this question:**  
Hoeveel weken heeft u deze thuiszorg gehad?  
Verpleging:  weken in de afgelopen 3 maanden
- 9  
10  
11  
12  
13  
14  
15  
16  
17
- 12.10.1.4 **If 'Wat voor hulp van de thuiszorg heeft u gehad in de afgelopen 3 maanden?' is equal to 'Huishoudelijke hulp; voorbeeld: stofzuigen, bed opmaken, boodschappen doen' answer this question:**  
Hoeveel uur thuiszorg kreeg u in deze weken gemiddeld? Huishoudelijke hulp: gemiddeld  uur in de week
- 18  
19  
20  
21  
22  
23  
24
- 12.10.1.5 **If 'Wat voor hulp van de thuiszorg heeft u gehad in de afgelopen 3 maanden?' is equal to 'Verzorging van uzelf; voorbeeld: hulp bij douchen of aankleden' answer this question:**  
Hoeveel uur thuiszorg kreeg u in deze weken gemiddeld? Verzorging van uzelf: gemiddeld  uur in de week
- 25  
26  
27  
28  
29  
30  
31  
32
- 12.10.1.6 **If 'Wat voor hulp van de thuiszorg heeft u gehad in de afgelopen 3 maanden?' is equal to 'Verpleging; voorbeeld: verband omdoen, medicijnen geven, bloeddruk meten' answer this question:**  
Hoeveel uur thuiszorg kreeg u in deze weken gemiddeld? Verpleging: gemiddeld  uur in de week
- 33  
34  
35  
36
- 12.11 Heeft u in de afgelopen 3 maanden medicijnen gebruikt?  Ja  Nee
- 37  
38  
39  
40  
41  
42
- 12.11.1 **If 'Heeft u in de afgelopen 3 maanden medicijnen gebruikt?' is equal to 'Ja' answer this question:**  
Welke medicijnen heeft u in de afgelopen 3 maanden gebruikt?
- 43  
44  
45  
46  
47
- 12.12 Bent u in de afgelopen 3 maanden op de spoedeisende eerste hulp van een ziekenhuis geweest? (Een andere naam voor spoedeisende eerste hulp is EHBO)  Nee  Ja
- 48  
49  
50  
51  
52  
53  
54  
55
- 12.12.1 **If 'Bent u in de afgelopen 3 maanden op de spoedeisende eerste hulp van een ziekenhuis geweest? (Een andere naam voor spoedeisende eerste hulp is EHBO)' is equal to 'Ja' answer this question:**  
Hoe vaak bent u geweest?  keer
- 56  
57  
58  
59  
60
- 12.13 Bent u in de afgelopen 3 maanden met een ambulance naar het ziekenhuis gebracht? (Een andere naam voor ambulance is ziekenauto)  Nee  Ja

1  
2  
3  
4  
5  
6  
7

12.13.1 **If 'Bent u in de afgelopen 3 maanden met een ambulance naar het ziekenhuis gebracht? (Een andere naam voor ambulance is ziekenauto)' is equal to 'Ja' answer this question:**  
Hoe vaak bent u naar het ziekenhuis gebracht?

keer

8  
9  
10  
11  
12

12.14 Had u in de afgelopen 3 maanden een afspraak bij de polikliniek van het ziekenhuis? (Het gaat om afspraken voor uzelf met een dokter. Bijvoorbeeld met de cardioloog, reumatoloog of neuroloog)

Ja  
 Nee

13  
14  
15  
16  
17  
18  
19  
20  
21

12.14.1 **If 'Had u in de afgelopen 3 maanden een afspraak bij de polikliniek van het ziekenhuis? (Het gaat om afspraken voor uzelf met een dokter. Bijvoorbeeld met de cardioloog, reumatoloog of neuroloog)' is equal to 'Ja' answer this question:**  
Bij welke soorten dokters bent u in de afgelopen 3 maanden in het ziekenhuis geweest? En hoe vaak?

22  
23  
24  
25  
26  
27

12.15 Bent u in de afgelopen 3 maanden overdag in het ziekenhuis geweest voor een behandeling? (U bleef dus niet slapen. U kwam bijvoorbeeld voor een bloedtransfusie, nierdialyse of chemokuur)

Ja  
 Nee

28  
29  
30  
31  
32  
33  
34

12.15.1 **If 'Bent u in de afgelopen 3 maanden overdag in het ziekenhuis geweest voor een behandeling? (U bleef dus niet slapen. U kwam bijvoorbeeld voor een bloedtransfusie, nierdialyse of chemokuur)' is equal to 'Ja' answer this question:**  
Voor welke soort behandeling was dit?

35  
36  
37  
38  
39  
40  
41  
42  
43

12.15.2 **If 'Bent u in de afgelopen 3 maanden overdag in het ziekenhuis geweest voor een behandeling? (U bleef dus niet slapen. U kwam bijvoorbeeld voor een bloedtransfusie, nierdialyse of chemokuur)' is equal to 'Ja' answer this question:**  
Hoeveel keer moest u in de afgelopen 3 maanden voor deze behandelingen naar het ziekenhuis?

44  
45  
46  
47  
48  
49  
50

12.16 Bent u in de afgelopen 3 maanden ergens anders geweest voor een behandeling overdag? (U bleef dus niet slapen. U ging bijvoorbeeld naar de dagopvang van een woon-/zorgcentrum of een psychiatrische instelling. Of naar de dagbehandeling van een revalidatiecentrum)

Ja  
 Nee

51  
52  
53  
54  
55  
56  
57  
58  
59  
60

12.16.1 **If 'Bent u in de afgelopen 3 maanden ergens anders geweest voor een behandeling overdag? (U bleef dus niet slapen. U ging bijvoorbeeld naar de dagopvang van een woon-/zorgcentrum of een psychiatrische instelling. Of naar de dagbehandeling van een revalidatiecentrum)' is equal to 'Ja' answer this question:**  
Wat voor instelling was dit?

Woon-/zorgcentrum  
 Revalidatiecentrum  
 Psychiatrische instelling  
 Een andere instelling, namelijk

- 1  
2  
3  
4  
5  
6  
7
- 12.16.1.1 **If 'Wat voor instelling was dit?' is equal to 'Een andere instelling, namelijk' answer this question:**  
Wat voor instelling was dit?
- 8  
9  
10  
11  
12
- 12.16.1.2 **If 'Wat voor instelling was dit?' is equal to 'Woon-/zorgcentrum' answer this question:**  
Hoe vaak moest u hier in de afgelopen 3 maanden naartoe? Naar het woon-/zorgcentrum:
- 13  
14  
15  
16  
17
- 12.16.1.3 **If 'Wat voor instelling was dit?' is equal to 'Revalidatiecentrum' answer this question:**  
Hoe vaak moest u hier in de afgelopen 3 maanden naartoe? Naar het revalidatiecentrum:
- 18  
19  
20  
21  
22  
23
- 12.16.1.4 **If 'Wat voor instelling was dit?' is equal to 'Psychiatrische instelling' answer this question:**  
Hoe vaak moest u hier in de afgelopen 3 maanden naartoe? Naar de psychiatrische instelling:
- 24  
25  
26  
27  
28
- 12.16.1.5 **If 'Wat voor instelling was dit?' is equal to 'Een andere instelling, namelijk' answer this question:**  
Hoe vaak moest u hier in de afgelopen 3 maanden naartoe? Naar de andere instelling:
- 29  
30  
31  
32  
33
- 12.17 Heeft u in de afgelopen 3 maanden weleens in het ziekenhuis gelegen? (U moest dus blijven slapen. Bijvoorbeeld omdat u geopereerd was en niet meteen naar huis kon)
- 34  
35  
36  
37  
38  
39  
40  
41  
42
- 12.17.1 **If 'Heeft u in de afgelopen 3 maanden weleens in het ziekenhuis gelegen? (U moest dus blijven slapen. Bijvoorbeeld omdat u geopereerd was en niet meteen naar huis kon)' is equal to 'Ja' answer this question:**  
Hoe vaak heeft u in de afgelopen 3 maanden in het ziekenhuis gelegen?
- 43  
44  
45  
46  
47  
48  
49
- 12.17.2 **If 'Heeft u in de afgelopen 3 maanden weleens in het ziekenhuis gelegen? (U moest dus blijven slapen. Bijvoorbeeld omdat u geopereerd was en niet meteen naar huis kon)' is equal to 'Ja' answer this question:**  
Hoe lang heeft u in het ziekenhuis gelegen?
- 50  
51  
52  
53  
54  
55  
56  
57  
58  
59  
60



- 1  
2  
3  
4  
5  
6  
7  
8
- 12.18.1 **If 'Moest u in de afgelopen 3 maanden ergens anders blijven slapen voor uw gezondheid? (Bijvoorbeeld in een woon-/zorgcentrum, psychiatrische instelling of revalidatiecentrum)' is equal to 'Ja' answer this question:**  
Wat voor instelling was dit?
- Woon-/zorgcentrum  
 Revalidatiecentrum  
 Psychiatrische instelling  
 Een andere instelling, namelijk
- 
- 9  
10  
11  
12  
13  
14
- 12.18.1.1 **If 'Wat voor instelling was dit?' is equal to 'Een andere instelling, namelijk' answer this question:**  
Een andere instelling, namelijk
- 
- 
- 15  
16  
17  
18  
19
- 12.18.1.2 **If 'Wat voor instelling was dit?' is equal to 'Woon-/zorgcentrum' answer this question:**  
Hoe lang bent u in deze instelling geweest? In het woon-/zorgcentrum:
- dagen in de afgelopen 3 maanden
- 
- 20  
21  
22  
23  
24  
25
- 12.18.1.3 **If 'Wat voor instelling was dit?' is equal to 'Revalidatiecentrum' answer this question:**  
Hoe lang bent u in deze instelling geweest? In het revalidatiecentrum:
- dagen in de afgelopen 3 maanden
- 
- 26  
27  
28  
29  
30
- 12.18.1.4 **If 'Wat voor instelling was dit?' is equal to 'Psychiatrische instelling' answer this question:**  
Hoe lang bent u in deze instelling geweest? In de psychiatrische instelling:
- dagen in de afgelopen 3 maanden
- 
- 31  
32  
33  
34  
35
- 12.18.1.5 **If 'Wat voor instelling was dit?' is equal to 'Een andere instelling, namelijk' answer this question:**  
Hoe lang bent u in deze instelling geweest? In de andere instelling:
- dagen in de afgelopen 3 maanden
- 
- 36  
37  
38  
39  
40
- 12.19 Heeft u in de afgelopen 3 maanden hulp gekregen van een familielid of een bekende vanwege uw lichamelijke of psychische problemen?
- Ja  
 Nee
- 
- 41  
42  
43  
44  
45  
46  
47  
48  
49  
50  
51  
52  
53  
54  
55  
56  
57  
58  
59  
60
- 12.19.1 **If 'Heeft u in de afgelopen 3 maanden hulp gekregen van een familielid of een bekende vanwege uw lichamelijke of psychische problemen?' is equal to 'Ja' answer this question:**  
Wat voor hulp van familieleden of bekenden heeft u gehad in de afgelopen 3 maanden?
- Huishoudelijke hulp - voorbeeld: stofzuigen, bed opmaken, boodschappen doen, klaarmaken van eten en drinken, verzorgen van kinderen  
 Verzorging van uzelf - voorbeeld: hulp bij douchen of aankleden, hulp bij het eten en drinken of het geven van medicijnen  
 Praktische hulp - voorbeeld: ondersteuning bij wandelen, het maken van uitstapjes of bezoeken aan bekenden, bezoeken aan de huisarts of het ziekenhuis, het regelen van hulp of het regelen van financiële zaken

- 1  
2  
3  
4  
5  
6  
7  
8  
9  
10
- 12.19.1.1 **If 'Wat voor hulp van familieleden of bekenden heeft u gehad in de afgelopen 3 maanden?' is equal to 'Huishoudelijke hulp - voorbeeld: stofzuigen, bed opmaken, boodschappen doen, klaarmaken van eten en drinken, verzorgen van kinderen' answer this question:**  
Hoeveel weken heeft u deze hulp gehad?  
Huishoudelijke hulp:
- weken in de afgelopen 3 maanden
- 
- 11  
12  
13  
14  
15  
16  
17  
18  
19
- 12.19.1.2 **If 'Wat voor hulp van familieleden of bekenden heeft u gehad in de afgelopen 3 maanden?' is equal to 'Verzorging van uzelf - voorbeeld: hulp bij douchen of aankleden, hulp bij het eten en drinken of het geven van medicijnen' answer this question:**  
Hoeveel weken heeft u deze hulp gehad? Verzorging van uzelf:
- weken in de afgelopen 3 maanden
- 
- 20  
21  
22  
23  
24  
25  
26  
27  
28  
29  
30  
31
- 12.19.1.3 **If 'Wat voor hulp van familieleden of bekenden heeft u gehad in de afgelopen 3 maanden?' is equal to 'Praktische hulp - voorbeeld: ondersteuning bij wandelen, het maken van uitstapjes of bezoeken aan bekenden, bezoeken aan de huisarts of het ziekenhuis, het regelen van hulp of het regelen van financiële zaken' answer this question:**  
Hoeveel uur hulp kreeg u in deze weken gemiddeld?  
Praktische hulp:
- weken in de afgelopen 3 maanden
- 
- 32  
33  
34  
35  
36  
37  
38  
39  
40  
41
- 12.19.1.4 **If 'Wat voor hulp van familieleden of bekenden heeft u gehad in de afgelopen 3 maanden?' is equal to 'Huishoudelijke hulp - voorbeeld: stofzuigen, bed opmaken, boodschappen doen, klaarmaken van eten en drinken, verzorgen van kinderen' answer this question:**  
Hoeveel uur hulp kreeg u in deze weken gemiddeld?  
Huishoudelijke hulp: gemiddeld
- uur in de week
- 
- 42  
43  
44  
45  
46  
47  
48  
49
- 12.19.1.5 **If 'Wat voor hulp van familieleden of bekenden heeft u gehad in de afgelopen 3 maanden?' is equal to 'Verzorging van uzelf - voorbeeld: hulp bij douchen of aankleden, hulp bij het eten en drinken of het geven van medicijnen' answer this question:**  
Hoeveel uur hulp kreeg u in deze weken gemiddeld?  
Verzorging van uzelf: gemiddeld
- uur in de week
- 
- 50  
51  
52  
53  
54  
55  
56  
57  
58  
59  
60
- 12.19.1.6 **If 'Wat voor hulp van familieleden of bekenden heeft u gehad in de afgelopen 3 maanden?' is equal to 'Praktische hulp - voorbeeld: ondersteuning bij wandelen, het maken van uitstapjes of bezoeken aan bekenden, bezoeken aan de huisarts of het ziekenhuis, het regelen van hulp of het regelen van financiële zaken' answer this question:**  
Hoeveel uur hulp kreeg u in deze weken gemiddeld?  
Praktische hulp: gemiddeld
- uur in de week

## Vragenlijst PRIMA studie 52 weken - Dank

| Number | Question                                                                                                                                      | Answers                                                                  |
|--------|-----------------------------------------------------------------------------------------------------------------------------------------------|--------------------------------------------------------------------------|
| 13.1   | Hartelijk dank voor de tijd die u heeft genomen om de vragenlijsten in te vullen. Indien u nog opmerkingen heeft kunt u deze hierin plaatsen. | <div style="border: 1px dashed black; width: 100%; height: 100%;"></div> |

## Survey 'Vragenlijst PRIMA studie 6 weken'

### Vragenlijst PRIMA studie 6 weken - AOFAS - Pijn

| Number | Question                            | Answers                                                                                                                                                                                                         |
|--------|-------------------------------------|-----------------------------------------------------------------------------------------------------------------------------------------------------------------------------------------------------------------|
| 1.1    | Hoeveel pijn ervaart u aan uw voet? | <input type="checkbox"/> Geen<br><input type="checkbox"/> Milde pijnklachten of af en toe pijn<br><input type="checkbox"/> Matige pijnklachten, dagelijks<br><input type="checkbox"/> Vrijwel continu erge pijn |

### Vragenlijst PRIMA studie 6 weken - AOFAS resterende gedeelte

| Number | Question                                              | Answers                                                                                                                                                                                                                                                                                                                                                                                                                                           |
|--------|-------------------------------------------------------|---------------------------------------------------------------------------------------------------------------------------------------------------------------------------------------------------------------------------------------------------------------------------------------------------------------------------------------------------------------------------------------------------------------------------------------------------|
| 2.1    | Hoeveel beperkingen in het dagelijks leven ervaart u? | <input type="radio"/> Geen beperkingen, geen hulpmiddelen nodig<br><input type="radio"/> Geen beperkingen in algemeen dagelijkse bezigheden, wel beperkingen in recreatieve activiteiten (sport, hobbies, etc) geen ondersteuning<br><input type="radio"/> Beperkingen bij dagelijkse- en recreatieve activiteiten, stok<br><input type="radio"/> Ernstige beperkingen bij dagelijkse- en recreatieactiviteiten, walker, krukken, rolstoel, brace |

- 1  
2  
3  
4  
5  
6  
7  
8
- 
- 2.2 Wat is de afstand die u in één keer kunt lopen?
- Meer dan 600 meter
  - 400 - 600 meter
  - 100 - 300 meter
  - Minder dan 100 meter
- 
- 9  
10  
11  
12  
13  
14  
15  
16
- 2.3 Heeft u moeite met lopen op een bepaalde ondergrond?
- Geen problemen bij lopen
  - Enig problemen op ongelijke ondergrond, trap, helling, ladders
  - Ernstige problemen bij ongelijke ondergrond, trap, helling, ladders
- 
- 17  
18  
19  
20  
21  
22
- 2.4 Hoe zou u uw looppatroon beoordelen?
- Normaal of minimaal afwijkend
  - Duidelijk
  - Ernstig
- 
- 23  
24  
25  
26  
27  
28  
29
- 2.5 Hoe zou u de beweeglijkheid van uw voet beoordelen ten opzichte van de andere zijde of ten opzichte van vóór het ongeval?
- Hetzelfde of licht beperkt t.o.v. de niet aangedane zijde of zoals voor het ongeval
  - Ongeveer de helft beperkt
  - Sterk verminderd, bijna geen bewegingen mogelijk
- 
- 30  
31  
32  
33  
34  
35  
36  
37
- 2.6 Hoe zou u de beweeglijkheid van uw enkel beoordelen ten opzichte van de andere zijde of ten opzichte van voor het ongeval?
- Hetzelfde of licht beperkt t.o.v. de niet aangedane zijde of zoals voor het ongeval
  - Ongeveer de helft beperkt
  - Sterk verminderd, bijna geen bewegingen mogelijk
- 
- 38  
39  
40  
41  
42  
43
- 2.7 Hoe zou u de stabiliteit van uw voet en enkel beoordelen
- Stabiel, ik verzwik mijn enkel hooguit incidenteel
  - Niet stabiel, ik verzwik mijn enkel vaak
- 
- 44  
45  
46  
47  
48  
49  
50  
51  
52  
53  
54  
55  
56  
57  
58  
59  
60
- 2.8 Hoe zou u de stand van uw voet beoordelen ten opzichte van de andere zijde of ten opzichte van voor het ongeval?
- Goed, ik kan mijn voet goed plat op de grond zetten, waarbij de stand niet afwijkend is
  - Ik sta vrijwel alleen op de buitenzijde van mijn voet
  - Ik kan mijn voet niet plat op de grond zetten en loop vrijwel alleen op mijn voorvoet

## Vragenlijst PRIMA studie 6 weken - VAS Pain score

1  
2  
3  
4  
5  
6  
7  
8  
9  
10  
11  
12  
13  
14  
15  
16  
17  
18  
19  
20  
21  
22  
23  
24  
25  
26  
27  
28  
29  
30  
31  
32  
33  
34  
35  
36  
37  
38  
39  
40  
41  
42  
43  
44  
45  
46  
47  
48  
49  
50  
51  
52  
53  
54  
55  
56  
57  
58  
59  
60

| Number | Question                                                                                                                                                             | Answers             |
|--------|----------------------------------------------------------------------------------------------------------------------------------------------------------------------|---------------------|
| 3.1    | VAS pijnscore (Geef uw minimaal pijnscore aan tijdens dagelijkse activiteiten op een schaal van 0 tot 100, waarbij 0 geen pijn is en 100 de ergste pijn denkbaar is) | (0.00) 100 (100.00) |

## Vragenlijst PRIMA studie 6 weken - AAS

| Number | Question | Answers |
|--------|----------|---------|
|--------|----------|---------|

- 1  
2  
3  
4  
5  
6  
7  
8  
9  
10  
11  
12  
13  
14  
15  
16  
17  
18  
19  
20  
21  
22  
23  
24  
25  
26  
27  
28  
29  
30  
31  
32  
33  
34  
35  
36  
37  
38  
39  
40  
41  
42  
43  
44  
45  
46  
47  
48  
49  
50  
51  
52  
53  
54  
55  
56  
57  
58  
59  
60
- 4.1 Wat is het meest bij u van toepassing ten aanzien van uw activiteit?
- American Football
  - Basketbal
  - Gymnastiek/turnen
  - Handbal
  - Rugby
  - Voetbal
  - Hockey
  - Korfbal
  - Gevechtssporten: judo, karate, kung fu, taekwando, jiu jitsu, etc.
  - Oriëntatiewandelen
  - Rhythmische gymnastiek
  - Volleybal
  - Boxen
  - Freestyle snowboarden
  - IJshockey
  - Tennis
  - Worstelen
  - Fitness, aerobics
  - Badminton
  - Baseball
  - Cross-country hardlopen
  - Moderne pentathlon
  - Squash
  - Surfen, windsurfen
  - Tafel tennis
  - Atletiek: spring-, werponderdelen
  - Waterskiën
  - Dans
  - Schermen
  - Zaalhockey
  - Bergbeklimmen
  - Langlauf
  - Parachute springen
  - Softball
  - Speciale beroepen en werkactiviteiten; speciale beroepen: ballet, professioneel soldaat, speciale reddingswerker, stuntman, etc.
  - Duiken
  - Scubaduiken
  - Skaten, in-line skaten
  - Atletiek: looponderdelen
  - Triatlon
  - Gewichtsheffen, body-building

- Alle competitieve sporten hieronder met 'seasonal' conditioning
- Zwaar fysiek werk
- Alpine skiën en snowboarden
- Bowlen/curlen
- Golf
- Mountainbike/BMX
- Powerliften
- Zeilen
- Fysiek werk
- Wielrennen
- Paardrijden
- Motorsporten/technische sporten
- Roeien, kayakken
- Boogschieten
- Water polo en zwemmen
- Kunnen lopen op oneven grond
- Geen sport, echter geen limitatie in dagelijkse activiteiten
- Kunnen lopen op even grond, maar de dagelijkse activiteiten zijn gelimiteerd
- Niet kunnen lopen, fysieke handicap wegens enkelproblemen

- 
- 4.1.1 ***If 'Wat is het meest bij u van toepassing ten aanzien van uw activiteit?' is equal to 'American Football' answer this question:***  
American Football
- Professioneel
- Competitief
- Recreatief
- 
- 4.1.2 ***If 'Wat is het meest bij u van toepassing ten aanzien van uw activiteit?' is equal to 'Basketbal' answer this question:***  
Basketbal
- Professioneel
- Competitief
- Recreatief
- 
- 4.1.3 ***If 'Wat is het meest bij u van toepassing ten aanzien van uw activiteit?' is equal to 'Gymnastiek/turnen' answer this question:***  
Gymnastiek/turnen
- Professioneel
- Competitief
- Recreatief
- 
- 4.1.4 ***If 'Wat is het meest bij u van toepassing ten aanzien van uw activiteit?' is equal to 'Handbal' answer this question:***  
Handbal
- Professioneel
- Competitief
- Recreatief
- 
- 4.1.5 ***If 'Wat is het meest bij u van toepassing ten aanzien van uw activiteit?' is equal to 'Rugby' answer this question:***  
Rugby
- Professioneel
- Competitief
- Recreatief

|    |        |                                                                                                                                                                                          |                                     |
|----|--------|------------------------------------------------------------------------------------------------------------------------------------------------------------------------------------------|-------------------------------------|
| 1  |        |                                                                                                                                                                                          |                                     |
| 2  | 4.1.6  | <b>If 'Wat is het meest bij u van toepassing ten aanzien van uw acitiviteit?' is equal to 'Voetbal' answer this question:</b>                                                            | <input type="radio"/> Professioneel |
| 3  |        |                                                                                                                                                                                          | <input type="radio"/> Competitief   |
| 4  |        |                                                                                                                                                                                          | <input type="radio"/> Recreatief    |
| 5  |        | Voetbal                                                                                                                                                                                  |                                     |
| 6  |        |                                                                                                                                                                                          |                                     |
| 7  |        |                                                                                                                                                                                          |                                     |
| 8  | 4.1.7  | <b>If 'Wat is het meest bij u van toepassing ten aanzien van uw acitiviteit?' is equal to 'Hockey' answer this question:</b>                                                             | <input type="radio"/> Professioneel |
| 9  |        |                                                                                                                                                                                          | <input type="radio"/> Competitief   |
| 10 |        |                                                                                                                                                                                          | <input type="radio"/> Recreatief    |
| 11 |        | Hockey                                                                                                                                                                                   |                                     |
| 12 |        |                                                                                                                                                                                          |                                     |
| 13 |        |                                                                                                                                                                                          |                                     |
| 14 | 4.1.8  | <b>If 'Wat is het meest bij u van toepassing ten aanzien van uw acitiviteit?' is equal to 'Korfbal' answer this question:</b>                                                            | <input type="radio"/> Professioneel |
| 15 |        |                                                                                                                                                                                          | <input type="radio"/> Competitief   |
| 16 |        |                                                                                                                                                                                          | <input type="radio"/> Recreatief    |
| 17 |        | Korfbal                                                                                                                                                                                  |                                     |
| 18 |        |                                                                                                                                                                                          |                                     |
| 19 |        |                                                                                                                                                                                          |                                     |
| 20 | 4.1.9  | <b>If 'Wat is het meest bij u van toepassing ten aanzien van uw acitiviteit?' is equal to 'Gevechtssporten: judo, karate, kung fu, taekwando, jiu jitsu, etc.' answer this question:</b> | <input type="radio"/> Professioneel |
| 21 |        |                                                                                                                                                                                          | <input type="radio"/> Competitief   |
| 22 |        |                                                                                                                                                                                          | <input type="radio"/> Recreatief    |
| 23 |        | Gevechtssporten: judo, karate, kung fu, taekwando, jiu                                                                                                                                   |                                     |
| 24 |        | jitsu, etc.                                                                                                                                                                              |                                     |
| 25 |        |                                                                                                                                                                                          |                                     |
| 26 |        |                                                                                                                                                                                          |                                     |
| 27 | 4.1.10 | <b>If 'Wat is het meest bij u van toepassing ten aanzien van uw acitiviteit?' is equal to 'Oriëntatielopen' answer this question:</b>                                                    | <input type="radio"/> Professioneel |
| 28 |        |                                                                                                                                                                                          | <input type="radio"/> Competitief   |
| 29 |        |                                                                                                                                                                                          | <input type="radio"/> Recreatief    |
| 30 |        | Oriëntatielopen                                                                                                                                                                          |                                     |
| 31 |        |                                                                                                                                                                                          |                                     |
| 32 |        |                                                                                                                                                                                          |                                     |
| 33 | 4.1.11 | <b>If 'Wat is het meest bij u van toepassing ten aanzien van uw acitiviteit?' is equal to 'Rhythmische gymnastiek' answer this question:</b>                                             | <input type="radio"/> Professioneel |
| 34 |        |                                                                                                                                                                                          | <input type="radio"/> Competitief   |
| 35 |        |                                                                                                                                                                                          | <input type="radio"/> Recreatief    |
| 36 |        | Rhythmisch gymnastiek                                                                                                                                                                    |                                     |
| 37 |        |                                                                                                                                                                                          |                                     |
| 38 |        |                                                                                                                                                                                          |                                     |
| 39 | 4.1.12 | <b>If 'Wat is het meest bij u van toepassing ten aanzien van uw acitiviteit?' is equal to 'Volleybal' answer this question:</b>                                                          | <input type="radio"/> Professioneel |
| 40 |        |                                                                                                                                                                                          | <input type="radio"/> Competitief   |
| 41 |        |                                                                                                                                                                                          | <input type="radio"/> Recreatief    |
| 42 |        | Volleybal                                                                                                                                                                                |                                     |
| 43 |        |                                                                                                                                                                                          |                                     |
| 44 | 4.1.13 | <b>If 'Wat is het meest bij u van toepassing ten aanzien van uw acitiviteit?' is equal to 'Boxen' answer this question:</b>                                                              | <input type="radio"/> Professioneel |
| 45 |        |                                                                                                                                                                                          | <input type="radio"/> Competitief   |
| 46 |        |                                                                                                                                                                                          | <input type="radio"/> Recreatief    |
| 47 |        | Boxen                                                                                                                                                                                    |                                     |
| 48 |        |                                                                                                                                                                                          |                                     |
| 49 |        |                                                                                                                                                                                          |                                     |
| 50 | 4.1.14 | <b>If 'Wat is het meest bij u van toepassing ten aanzien van uw acitiviteit?' is equal to 'Freestyle snowboarden' answer this question:</b>                                              | <input type="radio"/> Professioneel |
| 51 |        |                                                                                                                                                                                          | <input type="radio"/> Competitief   |
| 52 |        |                                                                                                                                                                                          | <input type="radio"/> Recreatief    |
| 53 |        | Freestyle snowboarden                                                                                                                                                                    |                                     |
| 54 |        |                                                                                                                                                                                          |                                     |
| 55 |        |                                                                                                                                                                                          |                                     |
| 56 | 4.1.15 | <b>If 'Wat is het meest bij u van toepassing ten aanzien van uw acitiviteit?' is equal to 'Freestyle snowboarden' answer this question:</b>                                              | <input type="radio"/> Professioneel |
| 57 |        |                                                                                                                                                                                          | <input type="radio"/> Competitief   |
| 58 |        |                                                                                                                                                                                          | <input type="radio"/> Recreatief    |
| 59 |        | IJshockey                                                                                                                                                                                |                                     |
| 60 |        |                                                                                                                                                                                          |                                     |



- 1  
2  
3  
4  
5  
6  
7  
8  
9  
10  
11  
12  
13  
14  
15  
16  
17  
18  
19  
20  
21  
22  
23  
24  
25  
26  
27  
28  
29  
30  
31  
32  
33  
34  
35  
36  
37  
38  
39  
40  
41  
42  
43  
44  
45  
46  
47  
48  
49  
50  
51  
52  
53  
54  
55  
56  
57  
58  
59  
60
- 
- 4.1.16 ***If 'Wat is het meest bij u van toepassing ten aanzien van uw acitiviteit?' is equal to 'Tennis' answer this question:***  
Tennis
- Professioneel  
 Competitief  
 Recreatief
- 
- 4.1.17 ***If 'Wat is het meest bij u van toepassing ten aanzien van uw acitiviteit?' is equal to 'Worstelen' answer this question:***  
Worstelen
- Professioneel  
 Competitief  
 Recreatief
- 
- 4.1.18 ***If 'Wat is het meest bij u van toepassing ten aanzien van uw acitiviteit?' is equal to 'Fitness, aerobics' answer this question:***  
Fitness, aerobics
- Professioneel  
 Competitief  
 Recreatief
- 
- 4.1.19 ***If 'Wat is het meest bij u van toepassing ten aanzien van uw acitiviteit?' is equal to 'Badminton' answer this question:***  
Badminton
- Professioneel  
 Competitief  
 Recreatief
- 
- 4.1.20 ***If 'Wat is het meest bij u van toepassing ten aanzien van uw acitiviteit?' is equal to 'Baseball' answer this question:***  
Baseball
- Professioneel  
 Competitief  
 Recreatief
- 
- 4.1.21 ***If 'Wat is het meest bij u van toepassing ten aanzien van uw acitiviteit?' is equal to 'Cross-country hardlopen' answer this question:***  
Cross-country hardlopen
- Professioneel  
 Competitief  
 Recreatief
- 
- 4.1.22 ***If 'Wat is het meest bij u van toepassing ten aanzien van uw acitiviteit?' is equal to 'Moderne pentathlon' answer this question:***  
Moderne pentathlon
- Professioneel  
 Competitief  
 Recreatief
- 
- 4.1.23 ***If 'Wat is het meest bij u van toepassing ten aanzien van uw acitiviteit?' is equal to 'Squash' answer this question:***  
Squash
- Professioneel  
 Competitief  
 Recreatief
- 
- 4.1.24 ***If 'Wat is het meest bij u van toepassing ten aanzien van uw acitiviteit?' is equal to 'Surfen, windsurfen' answer this question:***  
Surfen, windsurfen
- Professioneel  
 Competitief  
 Recreatief
- 
- 4.1.25 ***If 'Wat is het meest bij u van toepassing ten aanzien van uw acitiviteit?' is equal to 'Tafel tennis' answer this question:***  
Tafel tennis
- Professioneel  
 Competitief  
 Recreatief

- 1  
2  
3  
4  
5  
6  
7
- 4.1.26 **If 'Wat is het meest bij u van toepassing ten aanzien van uw acitiviteit?' is equal to 'Atletiek: spring-, werponderdelen' answer this question:**  
Atletiek: spring-, werponderdelen
- Professioneel  
 Competitief  
 Recreatief
- 
- 8  
9  
10  
11  
12
- 4.1.27 **If 'Wat is het meest bij u van toepassing ten aanzien van uw acitiviteit?' is equal to 'Waterskieën' answer this question:**  
Waterskien
- Professioneel  
 Competitief  
 Recreatief
- 
- 13  
14  
15  
16  
17  
18
- 4.1.28 **If 'Wat is het meest bij u van toepassing ten aanzien van uw acitiviteit?' is equal to 'Dans' answer this question:**  
Dans
- Professioneel  
 Competitief  
 Recreatief
- 
- 19  
20  
21  
22  
23  
24
- 4.1.29 **If 'Wat is het meest bij u van toepassing ten aanzien van uw acitiviteit?' is equal to 'Schermen' answer this question:**  
Schermen
- Professioneel  
 Competitief  
 Recreatief
- 
- 25  
26  
27  
28  
29  
30
- 4.1.30 **If 'Wat is het meest bij u van toepassing ten aanzien van uw acitiviteit?' is equal to 'Zaalhockey' answer this question:**  
Zaalhockey
- Professioneel  
 Competitief  
 Recreatief
- 
- 31  
32  
33  
34  
35
- 4.1.31 **If 'Wat is het meest bij u van toepassing ten aanzien van uw acitiviteit?' is equal to 'Bergbeklimmen' answer this question:**  
Bergbeklimmen
- Professioneel  
 Competitief  
 Recreatief
- 
- 36  
37  
38  
39  
40  
41
- 4.1.32 **If 'Wat is het meest bij u van toepassing ten aanzien van uw acitiviteit?' is equal to 'Langlauf' answer this question:**  
Langlauf
- Professioneel  
 Competitief  
 Recreatief
- 
- 42  
43  
44  
45  
46  
47
- 4.1.33 **If 'Wat is het meest bij u van toepassing ten aanzien van uw acitiviteit?' is equal to 'Parachute springen' answer this question:**  
Parachute springen
- Professioneel  
 Competitief  
 Recreatief
- 
- 48  
49  
50  
51  
52  
53  
54  
55  
56  
57  
58  
59  
60
- 4.1.34 **If 'Wat is het meest bij u van toepassing ten aanzien van uw acitiviteit?' is equal to 'Softball' answer this question:**  
Softball
- Professioneel  
 Competitief  
 Recreatief

- 1  
2  
3  
4  
5  
6  
7  
8  
9  
10  
11  
12
- 4.1.35 ***If 'Wat is het meest bij u van toepassing ten aanzien van uw acitiviteit?' is equal to 'Speciale beroepen en werkactiviteiten; speciale beroepen: ballet, professioneel soldaat, speciale reddingswerker, stuntman, etc.'* answer this question:**  
Speciale beroepen en werkactiviteiten speciale beroepen: ballet, professioneel soldaat, speciale reddingswerker, stuntman, etc.
- ballet, professioneel soldaat, speciale reddingswerker, stuntman, etc.
- 
- 13  
14  
15  
16  
17
- 4.1.36 ***If 'Wat is het meest bij u van toepassing ten aanzien van uw acitiviteit?' is equal to 'Duiken' answer this question:***  
Duiken
- Professioneel/competitief  
 Recreatief
- 
- 18  
19  
20  
21  
22
- 4.1.37 ***If 'Wat is het meest bij u van toepassing ten aanzien van uw acitiviteit?' is equal to 'Scubaduiken' answer this question:***  
Scubaduiken
- Professioneel/competitief  
 Recreatief
- 
- 23  
24  
25  
26  
27  
28
- 4.1.38 ***If 'Wat is het meest bij u van toepassing ten aanzien van uw acitiviteit?' is equal to 'Skaten, in-line skaten' answer this question:***  
skaten, in-linen skaten
- Professioneel/competitief  
 Recreatief
- 
- 29  
30  
31  
32  
33
- 4.1.39 ***If 'Wat is het meest bij u van toepassing ten aanzien van uw acitiviteit?' is equal to 'Atletiek: looponderdelen' answer this question:***  
Atletiek: looponderdelen
- Professioneel/competitief  
 Recreatief
- 
- 34  
35  
36  
37  
38
- 4.1.40 ***If 'Wat is het meest bij u van toepassing ten aanzien van uw acitiviteit?' is equal to 'Triatlon' answer this question:***  
triatlon
- Professioneel/competitief  
 Recreatief
- 
- 39  
40  
41  
42  
43  
44  
45
- 4.1.41 ***If 'Wat is het meest bij u van toepassing ten aanzien van uw acitiviteit?' is equal to 'Gewichtsheffen, body-building' answer this question:***  
Gewichtsheffen, body-building
- Professioneel/competitief  
 Recreatief
- 
- 46  
47  
48  
49  
50  
51  
52
- 4.1.42 ***If 'Wat is het meest bij u van toepassing ten aanzien van uw acitiviteit?' is equal to 'Alle competitieve sporten hieronder met 'seasonal' conditioning' answer this question:***  
Alle competitieve sporten hieronder met 'seasonal' conditioning
- Alle competitieve sporten hieronder met 'seasonal' conditioning
- 
- 53  
54  
55  
56  
57  
58  
59  
60
- 4.1.43 ***If 'Wat is het meest bij u van toepassing ten aanzien van uw acitiviteit?' is equal to 'Zwaar fysiek werk' answer this question:***  
Zwaar fysiek werk
- Alle competitieve sporten hieronder met 'seasonal' conditioning

- 1  
2  
3  
4  
5  
6  
7  
8  
9  
10  
11  
12  
13  
14  
15  
16  
17  
18  
19  
20  
21  
22  
23  
24  
25  
26  
27  
28  
29  
30  
31  
32  
33  
34  
35  
36  
37  
38  
39  
40  
41  
42  
43  
44  
45  
46  
47  
48  
49  
50  
51  
52  
53  
54  
55  
56  
57  
58  
59  
60
- 
- 4.1.44 ***If 'Wat is het meest bij u van toepassing ten aanzien van uw acitiviteit?' is equal to 'Alpine skiën en snowboarden' answer this question:***  
Alpine skien en snowboarden  Alpine skien en snowboarden
- 
- 4.1.45 ***If 'Wat is het meest bij u van toepassing ten aanzien van uw acitiviteit?' is equal to 'Bowlen/curlen' answer this question:***  
Bowlen/curlen  Bowlen/curlen
- 
- 4.1.46 ***If 'Wat is het meest bij u van toepassing ten aanzien van uw acitiviteit?' is equal to 'Golf' answer this question:***  
Golf  Golf
- 
- 4.1.47 ***If 'Wat is het meest bij u van toepassing ten aanzien van uw acitiviteit?' is equal to 'Mountainbike/BMX' answer this question:***  
Mountainbike/BMX  Mountainbike/BMX
- 
- 4.1.48 ***If 'Wat is het meest bij u van toepassing ten aanzien van uw acitiviteit?' is equal to 'Powerliften' answer this question:***  
Powerliften  Powerliften
- 
- 4.1.49 ***If 'Wat is het meest bij u van toepassing ten aanzien van uw acitiviteit?' is equal to 'Zeilen' answer this question:***  
Zeilen  Zeilen
- 
- 4.1.50 ***If 'Wat is het meest bij u van toepassing ten aanzien van uw acitiviteit?' is equal to 'Fysiek werk' answer this question:***  
Fysiek werk  Fysiek werk
- 
- 4.1.51 ***If 'Wat is het meest bij u van toepassing ten aanzien van uw acitiviteit?' is equal to 'Wielrennen' answer this question:***  
Wielrennen  Wielrennen
- 
- 4.1.52 ***If 'Wat is het meest bij u van toepassing ten aanzien van uw acitiviteit?' is equal to 'Paardrijden' answer this question:***  
Paardrijden  Paardrijden
- 
- 4.1.53 ***If 'Wat is het meest bij u van toepassing ten aanzien van uw acitiviteit?' is equal to 'Motorsporten/technische sporten' answer this question:***  
Motorsporten/technische sporten  Motorsporten/technische sporten
- 
- 4.1.54 ***If 'Wat is het meest bij u van toepassing ten aanzien van uw acitiviteit?' is equal to 'Roeien, kayakken' answer this question:***  
Roeien, kayakken  Roeien, kayakken

|        |                                                                                                                                                                                                                                                                                    |                                                                                                    |
|--------|------------------------------------------------------------------------------------------------------------------------------------------------------------------------------------------------------------------------------------------------------------------------------------|----------------------------------------------------------------------------------------------------|
| 4.1.55 | <b>If 'Wat is het meest bij u van toepassing ten aanzien van uw acitiviteit?' is equal to 'Boogschieten' answer this question:</b><br>Boogschieten                                                                                                                                 | <input type="radio"/> Boogschieten                                                                 |
| 4.1.56 | <b>If 'Wat is het meest bij u van toepassing ten aanzien van uw acitiviteit?' is equal to 'Water polo en zwemmen' answer this question:</b><br>Water polo en zwemmen                                                                                                               | <input type="radio"/> Water polo en zwemmen                                                        |
| 4.1.57 | <b>If 'Wat is het meest bij u van toepassing ten aanzien van uw acitiviteit?' is equal to 'Kunnen lopen op oneven grond' answer this question:</b><br>Kunnen lopen op oneven grond                                                                                                 | <input type="radio"/> Kunnen lopen op oneven grond                                                 |
| 4.1.58 | <b>If 'Wat is het meest bij u van toepassing ten aanzien van uw acitiviteit?' is equal to 'Geen sport, echter geen limitatie in dagelijkse activiteiten' answer this question:</b><br>Geen sport, echter geen limitatie in dagelijkse activiteiten                                 | <input type="radio"/> Geen sport, echter geen limitatie in dagelijkse activiteiten                 |
| 4.1.59 | <b>If 'Wat is het meest bij u van toepassing ten aanzien van uw acitiviteit?' is equal to 'Kunnen lopen op even grond, maar de dagelijkse activiteiten zijn gelimiteerd' answer this question:</b><br>Kunnen lopen op even grond, maar de dagelijkse activiteiten zijn gelimiteerd | <input type="radio"/> Kunnen lopen op even grond, maar de dagelijkse activiteiten zijn gelimiteerd |
| 4.1.60 | <b>If 'Wat is het meest bij u van toepassing ten aanzien van uw acitiviteit?' is equal to 'Niet kunnen lopen, fysieke handicap wegens enkelproblemen' answer this question:</b><br>Niet kunnen lopen, fysieke handicap wegens enkelproblemen                                       | <input type="radio"/> Niet kunnen lopen, fysieke handicap wegens enkelproblemen                    |

## Vragenlijst PRIMA studie 6 weken - Hoe tevreden bent u over de enkelklachten?

| Number | Question                                   | Answers                                                                                                                       |
|--------|--------------------------------------------|-------------------------------------------------------------------------------------------------------------------------------|
| 5.1    | Hoe tevreden bent u over de enkelklachten? | <input type="radio"/> Slecht<br><input type="radio"/> Matig<br><input type="radio"/> Goed<br><input type="radio"/> Uitstekend |

## Vragenlijst PRIMA studie 6 weken - SF-36

| Number | Question                                                                                                                                                                                                                                                                                                                                                           | Answers                                                                                                                                                                                                                                                                                      |
|--------|--------------------------------------------------------------------------------------------------------------------------------------------------------------------------------------------------------------------------------------------------------------------------------------------------------------------------------------------------------------------|----------------------------------------------------------------------------------------------------------------------------------------------------------------------------------------------------------------------------------------------------------------------------------------------|
|        | Deze vragenlijst gaat over uw standpunten t.a.v. uw gezondheid. Met behulp van deze gegevens kan worden bijgehouden hoe u zich voelt en hoe goed u in staat bent uw gebruikelijke bezigheden uit te voeren. Beantwoord elke vraag door een antwoord aan te klikken. Als u niet zeker weet hoe u een vraag moet beantwoorden, geef dan het best mogelijke antwoord. |                                                                                                                                                                                                                                                                                              |
| 6.1    | Hoe zou u over het algemeen uw gezondheid noemen?                                                                                                                                                                                                                                                                                                                  | <input type="radio"/> Uitstekend <input type="radio"/> Zeer goed <input type="radio"/> Goed <input type="radio"/> Matig <input type="radio"/> Slecht                                                                                                                                         |
| 6.2    | Hoe beoordeelt u nu uw gezondheid over het algemeen vergeleken met een jaar geleden?                                                                                                                                                                                                                                                                               | <input type="radio"/> Veel beter dan een jaar geleden <input type="radio"/> Wat beter dan een jaar geleden <input type="radio"/> Ongeveer hetzelfde als een jaar geleden<br><input type="radio"/> Wat slechter dan een jaar geleden <input type="radio"/> Veel slechter dan een jaar geleden |
| 6.3    | Wordt u door uw gezondheid op dit moment beperkt bij forse inspanning, zoals hardlopen, tillen van zware voorwerpen of een veeleisende sport beoefenen?                                                                                                                                                                                                            | <input type="radio"/> Ja, ernstig beperkt <input type="radio"/> Ja, een beetje beperkt <input type="radio"/> Nee, helemaal niet beperkt                                                                                                                                                      |
| 6.4    | Wordt u door uw gezondheid op dit moment beperkt bij matige inspanning zoals een tafel verplaatsen, stofzuigen, zwemmen of fietsen?                                                                                                                                                                                                                                | <input type="radio"/> Ja, ernstig beperkt <input type="radio"/> Ja, een beetje beperkt <input type="radio"/> Nee, helemaal niet beperkt                                                                                                                                                      |
| 6.5    | Wordt u door uw gezondheid op dit moment beperkt bij boodschappen tillen of dragen?                                                                                                                                                                                                                                                                                | <input type="radio"/> Ja, ernstig beperkt <input type="radio"/> Ja, een beetje beperkt <input type="radio"/> Nee, helemaal niet beperkt                                                                                                                                                      |
| 6.6    | Wordt u door uw gezondheid op dit moment beperkt bij een paar trappen oplopen?                                                                                                                                                                                                                                                                                     | <input type="radio"/> Ja, ernstig beperkt <input type="radio"/> Ja, een beetje beperkt <input type="radio"/> Nee, helemaal niet beperkt                                                                                                                                                      |
| 6.7    | Wordt u door uw gezondheid op dit moment beperkt bij één trap oplopen?                                                                                                                                                                                                                                                                                             | <input type="radio"/> Ja, ernstig beperkt <input type="radio"/> Ja, een beetje beperkt <input type="radio"/> Nee, helemaal niet beperkt                                                                                                                                                      |
| 6.8    | Wordt u door uw gezondheid op dit moment beperkt bij bukken, knielen of hurken?                                                                                                                                                                                                                                                                                    | <input type="radio"/> Ja, ernstig beperkt <input type="radio"/> Ja, een beetje beperkt <input type="radio"/> Nee, helemaal niet beperkt                                                                                                                                                      |
| 6.9    | Wordt u door uw gezondheid op dit moment beperkt bij meer dan één kilometer lopen?                                                                                                                                                                                                                                                                                 | <input type="radio"/> Ja, ernstig beperkt <input type="radio"/> Ja, een beetje beperkt <input type="radio"/> Nee, helemaal niet beperkt                                                                                                                                                      |
| 6.10   | Wordt u door uw gezondheid op dit moment beperkt bij een paar honderd meter lopen?                                                                                                                                                                                                                                                                                 | <input type="radio"/> Ja, ernstig beperkt <input type="radio"/> Ja, een beetje beperkt <input type="radio"/> Nee, helemaal niet beperkt                                                                                                                                                      |

- 1  
2  
3  
4  
5  
6  
7  
8  
9  
10  
11  
12  
13  
14  
15  
16  
17  
18  
19  
20  
21  
22  
23  
24  
25  
26  
27  
28  
29  
30  
31  
32  
33  
34  
35  
36  
37  
38  
39  
40  
41  
42  
43  
44  
45  
46  
47  
48  
49  
50  
51  
52  
53  
54  
55  
56  
57  
58  
59  
60
- 
- 6.11 Wordt u door uw gezondheid op dit moment beperkt bij ongeveer honderd meter lopen?  Ja, ernstig beperkt  Ja, een beetje beperkt  Nee, helemaal niet beperkt
- 
- 6.12 Wordt u door uw gezondheid op dit moment beperkt bij uzelf wassen of aankleden?  Ja, ernstig beperkt  Ja, een beetje beperkt  Nee, helemaal niet beperkt
- 
- 6.13 U besteedde in de afgelopen 4 weken minder tijd aan werk of andere bezigheden  Ja  Nee
- 
- 6.14 U heeft in de afgelopen 4 weken minder bereikt dan u zou willen  Ja  Nee
- 
- 6.15 U was in de afgelopen 4 weken beperkt in het soort werk of andere bezigheden.  Ja  Nee
- 
- 6.16 U had de afgelopen 4 weken moeite om uw werk of andere bezigheden uit te voeren (het kostte u bijvoorbeeld extra inspanning).  Ja  Nee
- 
- 6.17 U besteedde in de afgelopen 4 weken minder tijd aan werk of andere bezigheden ten gevolge van emotionele problemen  Ja  Nee
- 
- 6.18 U heeft in de afgelopen 4 weken minder bereikt dan u zou willen ten gevolge van emotionele problemen.  Ja  Nee
- 
- 6.19 U deed de afgelopen 4 weken uw werk of andere bezigheden niet zo zorgvuldig als gewoonlijk ten gevolge van emotionele problemen.  Ja  Nee
- 
- 6.20 In hoeverre hebben uw lichamelijke gezondheid of emotionele problemen u gedurende de afgelopen 4 weken gehinderd in uw normale omgang met familie, vrienden of burens, of bij activiteiten in groepsverband?  Helemaal niet  Enigszins  Nogal  Veel  Heel erg veel
- 
- 6.21 Hoeveel lichamelijke pijn heeft u de afgelopen 4 weken gehad?  Geen  Heel licht  Licht  Nogal  Ernstig  Heel ernstig
- 
- 6.22 In welke mate bent u de afgelopen 4 weken door de pijn gehinderd in uw normale werk (zowel werk buitenshuis als huishoudelijk werk)?  Helemaal niet  Een klein beetje  Nogal  Veel  Heel erg veel

1  
2 6.23 Voelde u zich levenslustig?  Altijd  
3  Meestal  
4  Vaak  
5  Soms  
6  Zelden  
7  Nooit  
8  
9  
10

11  
12 6.24 Was u erg zenuwachtig?  Altijd  
13  Meestal  
14  Vaak  
15  Soms  
16  Zelden  
17  Nooit  
18  
19  
20

21  
22 6.25 Zat u zo in de put dat u niets kon?  Altijd  
23  Meestal  
24  Vaak  
25  Soms  
26  Zelden  
27  Nooit  
28  
29  
30

31  
32 6.26 Voelde u zich rustig en tevreden?  Altijd  
33  Meestal  
34  Vaak  
35  Soms  
36  Zelden  
37  Nooit  
38  
39  
40

41  
42 6.27 Had u veel energie?  Altijd  
43  Meestal  
44  Vaak  
45  Soms  
46  Zelden  
47  Nooit  
48  
49  
50

51  
52 6.28 Voelde u zich somber en neerslachtig?  Altijd  
53  Meestal  
54  Vaak  
55  Soms  
56  Zelden  
57  Nooit  
58  
59  
60



- 1  
2  
3  
4  
5  
6  
7  
8  
9  
10  
11  
12  
13  
14  
15  
16  
17  
18  
19  
20  
21  
22  
23  
24  
25  
26  
27  
28  
29  
30  
31  
32  
33  
34  
35  
36  
37  
38  
39  
40  
41  
42  
43  
44  
45  
46  
47  
48  
49  
50  
51  
52  
53  
54  
55  
56  
57  
58  
59  
60
- 
- 6.29 Voelde u zich uitgeput?
- Altijd  
 Meestal  
 Vaak  
 Soms  
 Zelden  
 Nooit
- 
- 6.30 Was u een gelukkig mens?
- Altijd  
 Meestal  
 Vaak  
 Soms  
 Zelden  
 Nooit
- 
- 6.31 Voelde u zich moe?
- Altijd  
 Meestal  
 Vaak  
 Soms  
 Zelden  
 Nooit
- 
- 6.32 Hoe vaak hebben uw lichamelijke gezondheid of emotionele problemen u gedurende de afgelopen 4 weken gehinderd bij uw sociale activiteiten (zoals vrienden of familie bezoeken etc.)?
- Altijd  
 Meestal  
 Soms  
 Zelden  
 Nooit
- 
- 6.33 Ik lijk wat gemakkelijker ziek te worden dan andere mensen
- Volkomen juist  
 Grotendeels juist  
 Weet ik niet  
 Grotendeels onjuist  
 Volkomen onjuist
- 
- 6.34 Ik ben even gezond als andere mensen die ik ken
- Volkomen juist  
 Grotendeels juist  
 Weet ik niet  
 Grotendeels onjuist  
 Volkomen onjuist

- 1  
2  
3  
4  
5  
6  
7  
8  
9
- 
- 6.35 Ik verwacht dat mijn gezondheid achteruit zal gaan
- Volkomen juist
  - Grotendeels juist
  - Weet ik niet
  - Grotendeels onjuist
  - Volkomen onjuist
- 

- 10  
11  
12  
13  
14  
15  
16  
17  
18  
19  
20  
21  
22
- 6.36 Mijn gezondheid is uitstekend
- Volkomen juist
  - Grotendeels juist
  - Weet ik niet
  - Grotendeels onjuist
  - Volkomen onjuist

## Vragenlijst PRIMA studie 6 weken - GAS

| Number | Question                                                                                                                                                                                  | Answers                                                                                                                                                                                                                                                                                                                                                              |
|--------|-------------------------------------------------------------------------------------------------------------------------------------------------------------------------------------------|----------------------------------------------------------------------------------------------------------------------------------------------------------------------------------------------------------------------------------------------------------------------------------------------------------------------------------------------------------------------|
|        | Tijdens de eerste afspraak werd een duidelijk doel met u afgesproken. Dit werd tevens per email naar u gestuurd. Hoe is de situatie nu ten aanzien van de destijds gestelde doelstelling? |                                                                                                                                                                                                                                                                                                                                                                      |
| 7.1    | Wat is nu de situatie ten aanzien van het tijdens de eerste afspraak afgesproken doelstelling (Goal attainment Scaling)?                                                                  | <ul style="list-style-type: none"> <li><input type="radio"/> Achteruitgang (minder dan de uitgangssituatie)</li> <li><input type="radio"/> Uitgangssituatie</li> <li><input type="radio"/> Minder dan het doel</li> <li><input type="radio"/> Doel</li> <li><input type="radio"/> Meer dan het doel</li> <li><input type="radio"/> Veel meer dan het doel</li> </ul> |

## Vragenlijst PRIMA studie 6 weken - EQ-5D-3L

| Number | Question                                                                                                                                                                                                                                                                                                                                                           | Answers                                                                                                                                                                                                                  |
|--------|--------------------------------------------------------------------------------------------------------------------------------------------------------------------------------------------------------------------------------------------------------------------------------------------------------------------------------------------------------------------|--------------------------------------------------------------------------------------------------------------------------------------------------------------------------------------------------------------------------|
|        | Deze vragenlijst gaat over uw standpunten t.a.v. uw gezondheid. Met behulp van deze gegevens kan worden bijgehouden hoe u zich voelt en hoe goed u in staat bent uw gebruikelijke bezigheden uit te voeren. Beantwoord elke vraag door een antwoord aan te klikken. Als u niet zeker weet hoe u een vraag moet beantwoorden, geef dan het best mogelijke antwoord. |                                                                                                                                                                                                                          |
| 8.1    | Hoe is het met uw Mobiliteit gesteld?                                                                                                                                                                                                                                                                                                                              | <ul style="list-style-type: none"> <li><input type="radio"/> Ik heb geen problemen met lopen</li> <li><input type="radio"/> Ik heb enige problemen met lopen</li> <li><input type="radio"/> Ik ben bedlegerig</li> </ul> |

|                                                                                                                                                                                                                                     |                                                                                                                  |                                                                                                                                                                                                                                                             |
|-------------------------------------------------------------------------------------------------------------------------------------------------------------------------------------------------------------------------------------|------------------------------------------------------------------------------------------------------------------|-------------------------------------------------------------------------------------------------------------------------------------------------------------------------------------------------------------------------------------------------------------|
| 8.2                                                                                                                                                                                                                                 | Hoe is het met uw Zelfzorg gesteld?                                                                              | <input type="radio"/> Ik heb geen problemen om mijzelf te wassen of aan te kleden<br><input type="radio"/> Ik heb enige problemen om mijzelf te wassen of aan te kleden<br><input type="radio"/> Ik ben niet in staat om mijzelf te wassen of aan te kleden |
| 8.3                                                                                                                                                                                                                                 | Hoe is het met de Dagelijkse activiteiten (werk, studie, huishouden, gezins- en vrijetijdsactiviteiten) gesteld? | <input type="radio"/> Ik heb geen problemen met mijn dagelijkse activiteiten<br><input type="radio"/> Ik heb enige problemen met mijn dagelijkse activiteiten<br><input type="radio"/> Ik ben niet in staat om mijn dagelijkse activiteiten uit te voeren   |
| 8.4                                                                                                                                                                                                                                 | Hoe is het met de Pijn/klachten gesteld?                                                                         | <input type="radio"/> Ik heb geen pijn of andere klachten<br><input type="radio"/> Ik heb matige pijn of andere klachten<br><input type="radio"/> Ik heb zeer ernstige pijn of andere klachten                                                              |
| 8.5                                                                                                                                                                                                                                 | Hoe is het met de Stemming gesteld?                                                                              | <input type="radio"/> Ik ben niet angstig of somber<br><input type="radio"/> Ik ben matig angstig of somber<br><input type="radio"/> Ik ben erg angstig of somber                                                                                           |
| We willen weten hoe goed of slecht uw gezondheid VANDAAG is. Deze meetschaal loopt van 0 tot 100: 100 staat voor de BESTE gezondheid die u zich kunt voorstellen - 0 staat voor de SLECHTSTE gezondheid die u zich kunt voorstellen |                                                                                                                  |                                                                                                                                                                                                                                                             |
| 8.6                                                                                                                                                                                                                                 | Uw Gezondheid vandaag                                                                                            | (0.00) (100.00)                                                                                                                                                                                                                                             |

## Vragenlijst PRIMA studie 6 weken - AOS

| Number                                                                                                                                                                                                                                                                                                                                                                                                        | Question                                                   | Answers                                                                                            |
|---------------------------------------------------------------------------------------------------------------------------------------------------------------------------------------------------------------------------------------------------------------------------------------------------------------------------------------------------------------------------------------------------------------|------------------------------------------------------------|----------------------------------------------------------------------------------------------------|
| Instructies: De lijn naast elke vraag staat voor hoeveel PIJN u heeft in verschillende situaties. De linker kant (0) is "geen pijn" en de rechter kant (100) is "ergste pijn denkbaar". Geef voor de onderstaande situaties op de lijn aan hoeveel PIJN u in de afgelopen week in de enkel had. Als een of meerdere van deze situaties niet van toepassing waren, dan kiest u de "niet van toepassing" optie. |                                                            |                                                                                                    |
| 9.1                                                                                                                                                                                                                                                                                                                                                                                                           | Wat was de hoogte van de ergste pijn in de afgelopen week? | (0.00) (100.00)                                                                                    |
| 9.2                                                                                                                                                                                                                                                                                                                                                                                                           | Heeft u pijn als u 's ochtends opstaat?                    | <input type="radio"/> Ja<br><input type="radio"/> Nee<br><input type="radio"/> Niet van toepassing |

|    |       |                                                                                                                     |                                           |
|----|-------|---------------------------------------------------------------------------------------------------------------------|-------------------------------------------|
| 1  |       |                                                                                                                     |                                           |
| 2  | 9.2.1 | <b><i>If 'Heeft u pijn als u 's ochtends opstaat?' is equal to 'Ja' answer this question:</i></b>                   | (0.00) (100.00)                           |
| 3  |       |                                                                                                                     |                                           |
| 4  |       | Hoeveel pijn heeft u voordat u 's ochtends opstaat?                                                                 |                                           |
| 5  |       |                                                                                                                     |                                           |
| 6  | 9.3   | Heeft u pijn wanneer u op blote voeten loopt?                                                                       | <input type="radio"/> Ja                  |
| 7  |       |                                                                                                                     | <input type="radio"/> Nee                 |
| 8  |       |                                                                                                                     | <input type="radio"/> Niet van toepassing |
| 9  |       |                                                                                                                     |                                           |
| 10 |       |                                                                                                                     |                                           |
| 11 |       |                                                                                                                     |                                           |
| 12 | 9.3.1 | <b><i>If 'Heeft u pijn wanneer u op blote voeten loopt?' is equal to 'Ja' answer this question:</i></b>             | (0.00) (100.00)                           |
| 13 |       |                                                                                                                     |                                           |
| 14 |       | Hoeveel pijn heeft u als u op blote voeten loopt?                                                                   |                                           |
| 15 |       |                                                                                                                     |                                           |
| 16 | 9.4   | Heeft u pijn wanneer u op blote voeten staat?                                                                       | <input type="radio"/> Ja                  |
| 17 |       |                                                                                                                     | <input type="radio"/> Nee                 |
| 18 |       |                                                                                                                     | <input type="radio"/> Niet van toepassing |
| 19 |       |                                                                                                                     |                                           |
| 20 |       |                                                                                                                     |                                           |
| 21 |       |                                                                                                                     |                                           |
| 22 | 9.4.1 | <b><i>If 'Heeft u pijn wanneer u op blote voeten staat?' is equal to 'Ja' answer this question:</i></b>             | (0.00) (100.00)                           |
| 23 |       |                                                                                                                     |                                           |
| 24 |       | Hoeveel pijn heeft u als u op blote voeten staat?                                                                   |                                           |
| 25 |       |                                                                                                                     |                                           |
| 26 | 9.5   | Heeft u pijn wanneer u met schoenen loopt?                                                                          | <input type="radio"/> Ja                  |
| 27 |       |                                                                                                                     | <input type="radio"/> Nee                 |
| 28 |       |                                                                                                                     | <input type="radio"/> Niet van toepassing |
| 29 |       |                                                                                                                     |                                           |
| 30 |       |                                                                                                                     |                                           |
| 31 |       |                                                                                                                     |                                           |
| 32 | 9.5.1 | <b><i>If 'Heeft u pijn wanneer u met schoenen loopt?' is equal to 'Ja' answer this question:</i></b>                | (0.00) (100.00)                           |
| 33 |       |                                                                                                                     |                                           |
| 34 |       | Hoeveel pijn heeft u wanneer u met schoenen loopt?                                                                  |                                           |
| 35 |       |                                                                                                                     |                                           |
| 36 | 9.6   | Heeft u pijn wanneer u met schoenen staat?                                                                          | <input type="radio"/> Ja                  |
| 37 |       |                                                                                                                     | <input type="radio"/> Nee                 |
| 38 |       |                                                                                                                     | <input type="radio"/> Niet van toepassing |
| 39 |       |                                                                                                                     |                                           |
| 40 |       |                                                                                                                     |                                           |
| 41 |       |                                                                                                                     |                                           |
| 42 | 9.6.1 | <b><i>If 'Heeft u pijn wanneer u met schoenen staat?' is equal to 'Ja' answer this question:</i></b>                | (0.00) (100.00)                           |
| 43 |       |                                                                                                                     |                                           |
| 44 |       | Hoeveel pijn heeft u wanneer u met schoenen staat?                                                                  |                                           |
| 45 |       |                                                                                                                     |                                           |
| 46 | 9.7   | Heeft u pijn wanneer u loopt met steunzolen of een brace?                                                           | <input type="radio"/> Ja                  |
| 47 |       |                                                                                                                     | <input type="radio"/> Nee                 |
| 48 |       |                                                                                                                     | <input type="radio"/> Niet van toepassing |
| 49 |       |                                                                                                                     |                                           |
| 50 |       |                                                                                                                     |                                           |
| 51 |       |                                                                                                                     |                                           |
| 52 | 9.7.1 | <b><i>If 'Heeft u pijn wanneer u loopt met steunzolen of een brace?' is equal to 'Ja' answer this question:</i></b> | (0.00) (100.00)                           |
| 53 |       |                                                                                                                     |                                           |
| 54 |       | Hoeveel pijn heeft u wanneer u loopt met steunzolen of een brace?                                                   |                                           |
| 55 |       |                                                                                                                     |                                           |
| 56 |       |                                                                                                                     |                                           |
| 57 |       |                                                                                                                     |                                           |
| 58 |       |                                                                                                                     |                                           |
| 59 |       |                                                                                                                     |                                           |
| 60 |       |                                                                                                                     |                                           |

|    |        |                                                                                                              |                                           |          |
|----|--------|--------------------------------------------------------------------------------------------------------------|-------------------------------------------|----------|
| 1  |        |                                                                                                              |                                           |          |
| 2  | 9.8    | Heeft u pijn wanneer u staat met steunzolen of een brace?                                                    | <input type="radio"/> Ja                  |          |
| 3  |        |                                                                                                              | <input type="radio"/> Nee                 |          |
| 4  |        |                                                                                                              | <input type="radio"/> Niet van toepassing |          |
| 5  |        |                                                                                                              |                                           |          |
| 6  |        |                                                                                                              |                                           |          |
| 7  |        |                                                                                                              |                                           |          |
| 8  | 9.8.1  | <b>If 'Heeft u pijn wanneer u staat met steunzolen of een brace?' is equal to 'Ja' answer this question:</b> | (0.00)                                    | (100.00) |
| 9  |        | Hoeveel pijn heeft u wanneer u staat met steunzolen of een brace?                                            |                                           |          |
| 10 |        |                                                                                                              |                                           |          |
| 11 |        |                                                                                                              |                                           |          |
| 12 |        |                                                                                                              |                                           |          |
| 13 | 9.9    | Heeft u pijn aan het einde van de dag?                                                                       | <input type="radio"/> Ja                  |          |
| 14 |        |                                                                                                              | <input type="radio"/> Nee                 |          |
| 15 |        |                                                                                                              | <input type="radio"/> Niet van toepassing |          |
| 16 |        |                                                                                                              |                                           |          |
| 17 |        |                                                                                                              |                                           |          |
| 18 |        |                                                                                                              |                                           |          |
| 19 | 9.9.1  | <b>If 'Heeft u pijn aan het einde van de dag?' is equal to 'Ja' answer this question:</b>                    | (0.00)                                    | (100.00) |
| 20 |        | Hoeveel pijn heeft u aan het einde van de dag?                                                               |                                           |          |
| 21 |        |                                                                                                              |                                           |          |
| 22 |        |                                                                                                              |                                           |          |
| 23 |        | Instructies:De lijn naast elke vraag staat voor hoeveel MOEITE u heeft met verschillende activiteiten.       |                                           |          |
| 24 |        | De linker kant (0) is "Niet moeilijk" en de rechter kant (100) is "Te moeilijk, niet uitvoerbaar". Geef voor |                                           |          |
| 25 |        | de onderstaande activiteiten op de lijn aan hoeveel MOEITE u in de afgelopen week door                       |                                           |          |
| 26 |        | enkelklachten had met onderstaande activiteiten. Als een situatie niet van toepassing is, kies dan de        |                                           |          |
| 27 |        | optie "niet van toepassing".                                                                                 |                                           |          |
| 28 |        |                                                                                                              |                                           |          |
| 29 |        |                                                                                                              |                                           |          |
| 30 | 9.10   | Heeft u moeite met door het huis lopen?                                                                      | <input type="radio"/> Ja                  |          |
| 31 |        |                                                                                                              | <input type="radio"/> Nee                 |          |
| 32 |        |                                                                                                              | <input type="radio"/> Niet van toepassing |          |
| 33 |        |                                                                                                              |                                           |          |
| 34 |        |                                                                                                              |                                           |          |
| 35 | 9.10.1 | <b>If 'Heeft u moeite met door het huis lopen?' is equal to 'Ja' answer this question:</b>                   | (0.00)                                    | (100.00) |
| 36 |        | Hoeveel moeite heeft u met door het huis lopen?                                                              |                                           |          |
| 37 |        |                                                                                                              |                                           |          |
| 38 |        |                                                                                                              |                                           |          |
| 39 |        |                                                                                                              |                                           |          |
| 40 | 9.11   | Heeft u moeite met buiten lopen op oneven ondergrond?                                                        | <input type="radio"/> Ja                  |          |
| 41 |        |                                                                                                              | <input type="radio"/> Nee                 |          |
| 42 |        |                                                                                                              | <input type="radio"/> Niet van toepassing |          |
| 43 |        |                                                                                                              |                                           |          |
| 44 |        |                                                                                                              |                                           |          |
| 45 | 9.11.1 | <b>If 'Heeft u moeite met buiten lopen op oneven ondergrond?' is equal to 'Ja' answer this question:</b>     | (0.00)                                    | (100.00) |
| 46 |        | Hoeveel moeite heeft u met buiten lopen op oneven ondergrond?                                                |                                           |          |
| 47 |        |                                                                                                              |                                           |          |
| 48 |        |                                                                                                              |                                           |          |
| 49 |        |                                                                                                              |                                           |          |
| 50 |        |                                                                                                              |                                           |          |
| 51 | 9.12   | Heeft u moeite met een paar honderd meter lopen?                                                             | <input type="radio"/> Ja                  |          |
| 52 |        |                                                                                                              | <input type="radio"/> Nee                 |          |
| 53 |        |                                                                                                              | <input type="radio"/> Niet van toepassing |          |
| 54 |        |                                                                                                              |                                           |          |
| 55 |        |                                                                                                              |                                           |          |
| 56 | 9.12.1 | <b>If 'Heeft u moeite met een paar honderd meter lopen?' is equal to 'Ja' answer this question:</b>          | (0.00)                                    | (100.00) |
| 57 |        | Hoeveel moeite heeft u met een paar honderd meter lopen?                                                     |                                           |          |
| 58 |        |                                                                                                              |                                           |          |
| 59 |        |                                                                                                              |                                           |          |
| 60 |        |                                                                                                              |                                           |          |

|    |        |                                                                                                             |                                           |
|----|--------|-------------------------------------------------------------------------------------------------------------|-------------------------------------------|
| 1  |        |                                                                                                             |                                           |
| 2  | 9.13   | Heeft u moeite met een trap oplopen?                                                                        | <input type="radio"/> Ja                  |
| 3  |        |                                                                                                             | <input type="radio"/> Nee                 |
| 4  |        |                                                                                                             | <input type="radio"/> Niet van toepassing |
| 5  |        |                                                                                                             |                                           |
| 6  |        |                                                                                                             |                                           |
| 7  |        |                                                                                                             |                                           |
| 8  | 9.13.1 | <b>If 'Heeft u moeite met een trap oplopen?' is equal to 'Ja' answer this question:</b>                     | (0.00) (100.00)                           |
| 9  |        | Hoeveel moeite heeft u met een trap oplopen?                                                                |                                           |
| 10 |        |                                                                                                             |                                           |
| 11 |        |                                                                                                             |                                           |
| 12 | 9.14   | Heeft u moeite met een trap aflopen?                                                                        | <input type="radio"/> Ja                  |
| 13 |        |                                                                                                             | <input type="radio"/> Nee                 |
| 14 |        |                                                                                                             | <input type="radio"/> Niet van toepassing |
| 15 |        |                                                                                                             |                                           |
| 16 |        |                                                                                                             |                                           |
| 17 |        |                                                                                                             |                                           |
| 18 | 9.14.1 | <b>If 'Heeft u moeite met een trap aflopen?' is equal to 'Ja' answer this question:</b>                     | (0.00) (100.00)                           |
| 19 |        | Hoeveel moeite heeft u met een trap aflopen?                                                                |                                           |
| 20 |        |                                                                                                             |                                           |
| 21 |        |                                                                                                             |                                           |
| 22 | 9.15   | Heeft u moeite met op de tenen staan?                                                                       | <input type="radio"/> Ja                  |
| 23 |        |                                                                                                             | <input type="radio"/> Nee                 |
| 24 |        |                                                                                                             | <input type="radio"/> Niet van toepassing |
| 25 |        |                                                                                                             |                                           |
| 26 |        |                                                                                                             |                                           |
| 27 |        |                                                                                                             |                                           |
| 28 | 9.15.1 | <b>If 'Heeft u moeite met op de tenen staan?' is equal to 'Ja' answer this question:</b>                    | (0.00) (100.00)                           |
| 29 |        | Hoeveel moeite heeft u met op de tenen staan?                                                               |                                           |
| 30 |        |                                                                                                             |                                           |
| 31 |        |                                                                                                             |                                           |
| 32 | 9.16   | Heeft u moeite met opstaan uit de stoel?                                                                    | <input type="radio"/> Ja                  |
| 33 |        |                                                                                                             | <input type="radio"/> Nee                 |
| 34 |        |                                                                                                             | <input type="radio"/> Niet van toepassing |
| 35 |        |                                                                                                             |                                           |
| 36 |        |                                                                                                             |                                           |
| 37 |        |                                                                                                             |                                           |
| 38 | 9.16.1 | <b>If 'Heeft u moeite met opstaan uit de stoel?' is equal to 'Ja' answer this question:</b>                 | (0.00) (100.00)                           |
| 39 |        | Hoeveel moeite heeft u met opstaan uit de stoel?                                                            |                                           |
| 40 |        |                                                                                                             |                                           |
| 41 |        |                                                                                                             |                                           |
| 42 | 9.17   | Heeft u moeite met het op- of afstappen van stoepranden?                                                    | <input type="radio"/> Ja                  |
| 43 |        |                                                                                                             | <input type="radio"/> Nee                 |
| 44 |        |                                                                                                             | <input type="radio"/> Niet van toepassing |
| 45 |        |                                                                                                             |                                           |
| 46 |        |                                                                                                             |                                           |
| 47 |        |                                                                                                             |                                           |
| 48 | 9.17.1 | <b>If 'Heeft u moeite met het op- of afstappen van stoepranden?' is equal to 'Ja' answer this question:</b> | (0.00) (100.00)                           |
| 49 |        | Hoeveel moeite heeft u met het op- of afstappen van stoepranden?                                            |                                           |
| 50 |        |                                                                                                             |                                           |
| 51 |        |                                                                                                             |                                           |
| 52 |        |                                                                                                             |                                           |
| 53 |        |                                                                                                             |                                           |
| 54 | 9.18   | Heeft u moeite met snel lopen of rennen?                                                                    | <input type="radio"/> Ja                  |
| 55 |        |                                                                                                             | <input type="radio"/> Nee                 |
| 56 |        |                                                                                                             | <input type="radio"/> Niet van toepassing |
| 57 |        |                                                                                                             |                                           |
| 58 |        |                                                                                                             |                                           |
| 59 |        |                                                                                                             |                                           |
| 60 |        |                                                                                                             |                                           |

9.18.1 ***If 'Heeft u moeite met snel lopen of rennen?' is equal to 'Ja' answer this question:*** (0.00) (100.00)  
 Hoeveel moeite heeft u met snel lopen of rennen?

## Vragenlijst PRIMA studie 6 weken - FAOS

| Number | Question                                                                                                                                                                                                                                                                                                                                                                                                                                                                                                                                                                            | Answers                                                                                                                                                    |
|--------|-------------------------------------------------------------------------------------------------------------------------------------------------------------------------------------------------------------------------------------------------------------------------------------------------------------------------------------------------------------------------------------------------------------------------------------------------------------------------------------------------------------------------------------------------------------------------------------|------------------------------------------------------------------------------------------------------------------------------------------------------------|
|        | Deze lijst vraagt naar uw mening over uw voet/enkel. Uw antwoorden geven ons een beeld van uw voet/enkel klachten en hoe u in staat bent om alledaagse activiteiten uit te voeren in uw huidige situatie. Beantwoorden van een vraag doet u door het aanklikken van een vakje met het volgens u meest juiste antwoord (één vakje per vraag). Als u niet zeker weet hoe u een vraag moet beantwoorden, geeft u dan het antwoord dat volgens u het meest op uw situatie van toepassing is. Deze vraag heeft betrekking op het voorkomen van voet/enkel klachten in de afgelopen week. |                                                                                                                                                            |
| 10.1   | Is uw voet/enkel gezwollen?                                                                                                                                                                                                                                                                                                                                                                                                                                                                                                                                                         | <input type="radio"/> Nooit <input type="radio"/> Zelden <input type="radio"/> Soms <input type="radio"/> Vaak <input type="radio"/> Altijd                |
| 10.2   | Voelt u gekraak of hoort u klikken of een ander vreemd geluid wanneer u de voet/enkel beweegt?                                                                                                                                                                                                                                                                                                                                                                                                                                                                                      | <input type="radio"/> Nooit <input type="radio"/> Zelden <input type="radio"/> Soms <input type="radio"/> Vaak <input type="radio"/> Altijd                |
| 10.3   | Hapert uw enkel of blokkeert uw enkel ('op slot' gaan zitten) wanneer u deze beweegt?                                                                                                                                                                                                                                                                                                                                                                                                                                                                                               | <input type="radio"/> Nooit <input type="radio"/> Zelden <input type="radio"/> Soms <input type="radio"/> Vaak <input type="radio"/> Altijd                |
| 10.4   | Kunt u de voet/enkel volledig strekken?                                                                                                                                                                                                                                                                                                                                                                                                                                                                                                                                             | <input type="radio"/> Altijd <input type="radio"/> Vaak <input type="radio"/> Soms <input type="radio"/> Zelden <input type="radio"/> Nooit                |
| 10.5   | Kunt u de voet volledig naar u toe buigen?                                                                                                                                                                                                                                                                                                                                                                                                                                                                                                                                          | <input type="radio"/> Altijd <input type="radio"/> Vaak <input type="radio"/> Soms <input type="radio"/> Zelden <input type="radio"/> Nooit                |
| 10.6   | In welke mate heeft u een stijf gevoel in de voet/enkel 's ochtends bij het wakker worden?                                                                                                                                                                                                                                                                                                                                                                                                                                                                                          | <input type="radio"/> Niet <input type="radio"/> Mild <input type="radio"/> Matig <input type="radio"/> Ernstig <input type="radio"/> Zeer ernstig         |
| 10.7   | In welke mate heeft u een stijf gevoel in de voet/enkel na zitten, liggen of rusten later op de dag?                                                                                                                                                                                                                                                                                                                                                                                                                                                                                | <input type="radio"/> Niet <input type="radio"/> Mild <input type="radio"/> Matig <input type="radio"/> Ernstig <input type="radio"/> Zeer ernstig         |
| 10.8   | Hoe vaak heeft u pijn in uw voet/enkel?                                                                                                                                                                                                                                                                                                                                                                                                                                                                                                                                             | <input type="radio"/> Nooit <input type="radio"/> Maandelijks <input type="radio"/> Wekelijks <input type="radio"/> Dagelijks <input type="radio"/> Altijd |

1  
2  
3  
4  
5  
6  
7  
8  
9

---

10.9 Hoeveel voet/enkel pijn heeft u gehad in de afgelopen week bij draaien als uw voet/enkel op de grond staat?

Geen  
 Mild  
 Matig  
 Ernstig  
 Zeer ernstig

---

10  
11  
12  
13  
14  
15  
16  
17  
18

---

10.10 Hoeveel voet/enkel pijn heeft u gehad in de afgelopen week bij het volledig uitstrekken van de voet/enkel?

Geen  
 Mild  
 Matig  
 Ernstig  
 Zeer ernstig

---

19  
20  
21  
22  
23  
24  
25  
26

---

10.11 Hoeveel voet/enkel pijn heeft u gehad in de afgelopen week bij het volledig naar u toe buigen/optrekken van de voet/enkel

Geen  
 Mild  
 Matig  
 Ernstig  
 Zeer ernstig

---

27  
28  
29  
30  
31  
32  
33  
34

---

10.12 Hoeveel voet/enkel pijn heeft u gehad in de afgelopen week bij het lopen op een vlakke ondergrond

Geen  
 Mild  
 Matig  
 Ernstig  
 Zeer ernstig

---

35  
36  
37  
38  
39  
40  
41  
42  
43

---

10.13 Hoeveel voet/enkel pijn heeft u gehad in de afgelopen week bij het trap op- en trap af lopen?

Geen  
 Mild  
 Matig  
 Ernstig  
 Zeer ernstig

---

44  
45  
46  
47  
48  
49  
50  
51

---

10.14 Hoeveel voet/enkel pijn heeft u gehad in de afgelopen week 's nachts in bed?

Geen  
 Mild  
 Matig  
 Ernstig  
 Zeer ernstig

---

52  
53  
54  
55  
56  
57  
58  
59  
60

---

10.15 Hoeveel voet/enkel pijn heeft u gehad in de afgelopen week bij het zitten of liggen?

Geen  
 Mild  
 Matig  
 Ernstig  
 Zeer ernstig



|    |       |                                                                                                                        |                                    |                                    |
|----|-------|------------------------------------------------------------------------------------------------------------------------|------------------------------------|------------------------------------|
| 1  |       |                                                                                                                        |                                    |                                    |
| 2  | 10.16 | Hoeveel voet/enkel pijn heeft u gehad in de afgelopen week bij het rechtop staan?                                      | <input type="radio"/> Geen         |                                    |
| 3  |       |                                                                                                                        | <input type="radio"/> Mild         |                                    |
| 4  |       |                                                                                                                        | <input type="radio"/> Matig        |                                    |
| 5  |       |                                                                                                                        | <input type="radio"/> Ernstig      |                                    |
| 6  |       |                                                                                                                        | <input type="radio"/> Zeer ernstig |                                    |
| 7  |       |                                                                                                                        |                                    |                                    |
| 8  |       |                                                                                                                        |                                    |                                    |
| 9  |       |                                                                                                                        |                                    |                                    |
| 10 | 10.17 | In welke mate werd u gehinderd bij het trap aflopen?                                                                   | <input type="radio"/> Niet         | <input type="radio"/> Mild         |
| 11 |       |                                                                                                                        | <input type="radio"/> Matig        | <input type="radio"/>              |
| 12 |       |                                                                                                                        | Ernstig                            | <input type="radio"/> Zeer ernstig |
| 13 |       |                                                                                                                        |                                    |                                    |
| 14 |       |                                                                                                                        |                                    |                                    |
| 15 | 10.18 | In welke mate werd u gehinderd bij het trap op lopen?                                                                  | <input type="radio"/> Niet         | <input type="radio"/> Mild         |
| 16 |       |                                                                                                                        | <input type="radio"/> Matig        | <input type="radio"/>              |
| 17 |       |                                                                                                                        | Ernstig                            | <input type="radio"/> Zeer ernstig |
| 18 |       |                                                                                                                        |                                    |                                    |
| 19 | 10.19 | In welke mate werd u gehinderd als u vanuit een zittende positie ging staan?                                           | <input type="radio"/> Niet         | <input type="radio"/> Mild         |
| 20 |       |                                                                                                                        | <input type="radio"/> Matig        | <input type="radio"/>              |
| 21 |       |                                                                                                                        | Ernstig                            | <input type="radio"/> Zeer ernstig |
| 22 |       |                                                                                                                        |                                    |                                    |
| 23 |       |                                                                                                                        |                                    |                                    |
| 24 | 10.20 | In welke mate werd u gehinderd bij het staan?                                                                          | <input type="radio"/> Niet         | <input type="radio"/> Mild         |
| 25 |       |                                                                                                                        | <input type="radio"/> Matig        | <input type="radio"/>              |
| 26 |       |                                                                                                                        | Ernstig                            | <input type="radio"/> Zeer ernstig |
| 27 |       |                                                                                                                        |                                    |                                    |
| 28 | 10.21 | In welke mate werd u gehinderd bij het naar de grond buigen/iets oprapen?                                              | <input type="radio"/> Niet         | <input type="radio"/> Mild         |
| 29 |       |                                                                                                                        | <input type="radio"/> Matig        | <input type="radio"/>              |
| 30 |       |                                                                                                                        | Ernstig                            | <input type="radio"/> Zeer ernstig |
| 31 |       |                                                                                                                        |                                    |                                    |
| 32 | 10.22 | In welke mate werd u gehinderd bij het lopen op een vlakke ondergrond?                                                 | <input type="radio"/> Niet         | <input type="radio"/> Mild         |
| 33 |       |                                                                                                                        | <input type="radio"/> Matig        | <input type="radio"/>              |
| 34 |       |                                                                                                                        | Ernstig                            | <input type="radio"/> Zeer ernstig |
| 35 |       |                                                                                                                        |                                    |                                    |
| 36 |       |                                                                                                                        |                                    |                                    |
| 37 | 10.23 | In welke mate werd u gehinderd bij het in- en uit de auto stappen?                                                     | <input type="radio"/> Niet         | <input type="radio"/> Mild         |
| 38 |       |                                                                                                                        | <input type="radio"/> Matig        | <input type="radio"/>              |
| 39 |       |                                                                                                                        | Ernstig                            | <input type="radio"/> Zeer ernstig |
| 40 |       |                                                                                                                        |                                    |                                    |
| 41 | 10.24 | In welke mate werd u gehinderd bij het boodschappen doen?                                                              | <input type="radio"/> Niet         | <input type="radio"/> Mild         |
| 42 |       |                                                                                                                        | <input type="radio"/> Matig        | <input type="radio"/>              |
| 43 |       |                                                                                                                        | Ernstig                            | <input type="radio"/> Zeer ernstig |
| 44 |       |                                                                                                                        |                                    |                                    |
| 45 | 10.25 | In welke mate werd u gehinderd bij sokken/panty's aantrekken?                                                          | <input type="radio"/> Niet         | <input type="radio"/> Mild         |
| 46 |       |                                                                                                                        | <input type="radio"/> Matig        | <input type="radio"/>              |
| 47 |       |                                                                                                                        | Ernstig                            | <input type="radio"/> Zeer ernstig |
| 48 |       |                                                                                                                        |                                    |                                    |
| 49 |       |                                                                                                                        |                                    |                                    |
| 50 | 10.26 | In welke mate werd u gehinderd bij het opstaan uit bed?                                                                | <input type="radio"/> Niet         | <input type="radio"/> Mild         |
| 51 |       |                                                                                                                        | <input type="radio"/> Matig        | <input type="radio"/>              |
| 52 |       |                                                                                                                        | Ernstig                            | <input type="radio"/> Zeer ernstig |
| 53 |       |                                                                                                                        |                                    |                                    |
| 54 | 10.27 | In welke mate werd u gehinderd bij het sokken uittrekken?                                                              | <input type="radio"/> Niet         | <input type="radio"/> Mild         |
| 55 |       |                                                                                                                        | <input type="radio"/> Matig        | <input type="radio"/>              |
| 56 |       |                                                                                                                        | Ernstig                            | <input type="radio"/> Zeer ernstig |
| 57 |       |                                                                                                                        |                                    |                                    |
| 58 |       |                                                                                                                        |                                    |                                    |
| 59 | 10.28 | In welke mate werd u gehinderd bij het in bed liggen (omdraaien, lange tijd uw voet/enkel in dezelfde positie houden)? | <input type="radio"/> Niet         | <input type="radio"/> Mild         |
| 60 |       |                                                                                                                        | <input type="radio"/> Matig        | <input type="radio"/>              |
|    |       |                                                                                                                        | Ernstig                            | <input type="radio"/> Zeer ernstig |

|       |                                                                                                                  |                                                                                                                                                                    |                                                                      |                             |                              |
|-------|------------------------------------------------------------------------------------------------------------------|--------------------------------------------------------------------------------------------------------------------------------------------------------------------|----------------------------------------------------------------------|-----------------------------|------------------------------|
| 10.29 | In welke mate werd u gehinderd bij het in/uit bad stappen?                                                       | <input type="radio"/> Niet<br>Ernstig                                                                                                                              | <input type="radio"/> Mild<br><input type="radio"/> Zeer ernstig     | <input type="radio"/> Matig | <input type="radio"/>        |
| 10.30 | In welke mate werd u gehinderd bij zitten?                                                                       | <input type="radio"/> Niet<br>Ernstig                                                                                                                              | <input type="radio"/> Mild<br><input type="radio"/> Zeer ernstig     | <input type="radio"/> Matig | <input type="radio"/>        |
| 10.31 | In welke mate werd u gehinderd bij het toilet op en af gaan?                                                     | <input type="radio"/> Niet<br>Ernstig                                                                                                                              | <input type="radio"/> Mild<br><input type="radio"/> Zeer ernstig     | <input type="radio"/> Matig | <input type="radio"/>        |
| 10.32 | In welke mate werd u gehinderd bij zwaar huishoudelijk werk (bijvoorbeeld zware dozen sjouwen, vloer schrobben)? | <input type="radio"/> Niet<br>Ernstig                                                                                                                              | <input type="radio"/> Mild<br><input type="radio"/> Zeer ernstig     | <input type="radio"/> Matig | <input type="radio"/>        |
| 10.33 | In welke mate werd u gehinderd bij licht huishoudelijk werk (bijvoorbeeld koken, afstoffen)?                     | <input type="radio"/> Niet<br>Ernstig                                                                                                                              | <input type="radio"/> Mild<br><input type="radio"/> Zeer ernstig     | <input type="radio"/> Matig | <input type="radio"/>        |
| 10.34 | In welke mate werd u gehinderd bij hurken?                                                                       | <input type="radio"/> Niet<br>Ernstig                                                                                                                              | <input type="radio"/> Mild<br><input type="radio"/> Zeer ernstig     | <input type="radio"/> Matig | <input type="radio"/>        |
| 10.35 | In welke mate werd u gehinderd bij hardlopen?                                                                    | <input type="radio"/> Niet<br>Ernstig                                                                                                                              | <input type="radio"/> Mild<br><input type="radio"/> Zeer ernstig     | <input type="radio"/> Matig | <input type="radio"/>        |
| 10.36 | In welke mate werd u gehinderd bij springen?                                                                     | <input type="radio"/> Niet<br>Ernstig                                                                                                                              | <input type="radio"/> Mild<br><input type="radio"/> Zeer ernstig     | <input type="radio"/> Matig | <input type="radio"/>        |
| 10.37 | In welke mate werd u gehinderd bij ronddraaien op uw aangedane voet/enkel?                                       | <input type="radio"/> Niet<br>Ernstig                                                                                                                              | <input type="radio"/> Mild<br><input type="radio"/> Zeer ernstig     | <input type="radio"/> Matig | <input type="radio"/>        |
| 10.38 | In welke mate werd u gehinderd bij knielen?                                                                      | <input type="radio"/> Niet<br>Ernstig                                                                                                                              | <input type="radio"/> Mild<br><input type="radio"/> Zeer ernstig     | <input type="radio"/> Matig | <input type="radio"/>        |
| 10.39 | Hoe vaak bent u zich bewust van uw voet/enkel probleem?                                                          | <input type="radio"/> Nooit<br>Wekelijks                                                                                                                           | <input type="radio"/> Maandelijks<br><input type="radio"/> Dagelijks | <input type="radio"/>       | <input type="radio"/> Altijd |
| 10.40 | Heeft u uw leven veranderd om activiteiten te vermijden die schadelijk kunnen zijn voor uw voet/enkel?           | <input type="radio"/> Niet<br><input type="radio"/> Enigszins<br><input type="radio"/> Matig<br><input type="radio"/> Behoorlijk<br><input type="radio"/> Volledig |                                                                      |                             |                              |

1  
2  
3  
4  
5  
6  
7  
8  
9  
10  
11  
12  
13  
14  
15  
16  
17  
18  
19  
20  
21  
22  
23  
24  
25  
26  
27  
28  
29  
30  
31  
32  
33  
34  
35  
36  
37  
38  
39  
40  
41  
42  
43  
44  
45  
46  
47  
48  
49  
50  
51  
52  
53  
54  
55  
56  
57  
58  
59  
60

---

10.41 In hoeverre kunt u op uw voet/enkel vertrouwen?

Volledig

Behoorlijk

Matig

Enigzins

Niet

---

10.42 In het algemeen, in welke mate ondervindt u hinder van uw voet/enkel

Geen

Mild

Matig

Ernstig

Zeer ernstig

## Vragenlijst PRIMA studie 6 weken - Dank

| Number | Question                                                                                                                                      | Answers                                                                  |
|--------|-----------------------------------------------------------------------------------------------------------------------------------------------|--------------------------------------------------------------------------|
| 11.1   | Hartelijk dank voor de tijd die u heeft genomen om de vragenlijsten in te vullen. Indien u nog opmerkingen heeft kunt u deze hierin plaatsen. | <div style="border: 1px dashed black; height: 60px; width: 100%;"></div> |

# BMJ Open

**Platelet Rich plasma Injection Management for Ankle osteoarthritis study (PRIMA)  
Protocol of a Dutch multi-center, stratified, block-randomized, double-blind, placebo-controlled trial**

|                                 |                                                                                                                                                                                                                                                                                                                                                                                                                                                                                                                                                                                                                                                                                                                                                                                                                                                                                                                                                                                                                                                                                                                                                                                                                                                                                                                                                                                                                                                                                                                                                                                                                                       |
|---------------------------------|---------------------------------------------------------------------------------------------------------------------------------------------------------------------------------------------------------------------------------------------------------------------------------------------------------------------------------------------------------------------------------------------------------------------------------------------------------------------------------------------------------------------------------------------------------------------------------------------------------------------------------------------------------------------------------------------------------------------------------------------------------------------------------------------------------------------------------------------------------------------------------------------------------------------------------------------------------------------------------------------------------------------------------------------------------------------------------------------------------------------------------------------------------------------------------------------------------------------------------------------------------------------------------------------------------------------------------------------------------------------------------------------------------------------------------------------------------------------------------------------------------------------------------------------------------------------------------------------------------------------------------------|
| Journal:                        | <i>BMJ Open</i>                                                                                                                                                                                                                                                                                                                                                                                                                                                                                                                                                                                                                                                                                                                                                                                                                                                                                                                                                                                                                                                                                                                                                                                                                                                                                                                                                                                                                                                                                                                                                                                                                       |
| Manuscript ID                   | bmjopen-2019-030961.R2                                                                                                                                                                                                                                                                                                                                                                                                                                                                                                                                                                                                                                                                                                                                                                                                                                                                                                                                                                                                                                                                                                                                                                                                                                                                                                                                                                                                                                                                                                                                                                                                                |
| Article Type:                   | Protocol                                                                                                                                                                                                                                                                                                                                                                                                                                                                                                                                                                                                                                                                                                                                                                                                                                                                                                                                                                                                                                                                                                                                                                                                                                                                                                                                                                                                                                                                                                                                                                                                                              |
| Date Submitted by the Author:   | 18-Sep-2019                                                                                                                                                                                                                                                                                                                                                                                                                                                                                                                                                                                                                                                                                                                                                                                                                                                                                                                                                                                                                                                                                                                                                                                                                                                                                                                                                                                                                                                                                                                                                                                                                           |
| Complete List of Authors:       | <p>Paget, Liam; Amsterdam UMC - Locatie AMC, Orthopaedic Surgery; Amsterdam Collaboration for Health and Safety in Sports (ACHSS), AMC/VUmc IOC Research Center</p> <p>Bierma-Zeinstra, Sita; Erasmus University Medical Centre, Department of General Practice; Erasmus Medical Center, Orthopaedic Surgery</p> <p>Goedegebuure, S; OLVG, the Sport Physician Group, Sports Medicine; Academic Center for Evidence-based Sports medicine (ACES), Amsterdam UMC</p> <p>Kerkhoffs, Gino; Amsterdam UMC - Locatie AMC, Orthopaedic Surgery; Amsterdam Collaboration for Health and Safety in Sports (ACHSS), AMC/VUmc IOC Research Center</p> <p>Krips, R; Flevoziekenhuis, Orthopaedic Surgery</p> <p>Maas, Mario; Amsterdam UMC - Locatie AMC, Radiology; Academic Center for Evidence-based Sports medicine (ACES), Amsterdam UMC</p> <p>Moen, Maarten; Bergman Clinics, Sports Medicine; OLVG, the Sport Physician Group</p> <p>Reurink, G; Academic Center for Evidence-based Sports medicine (ACES), Amsterdam UMC; OLVG, the Sport Physician Group, Sports Medicine</p> <p>Stufkens, Sjoerd; Amsterdam UMC - Locatie AMC, Orthopaedic Surgery; Amsterdam Collaboration for Health and Safety in Sports (ACHSS), AMC/VUmc IOC Research Center</p> <p>de Vos, Robert-Jan; Erasmus University Medical Centre, Orthopaedics and Sports Medicine</p> <p>Weir, A; Erasmus University Medical Centre, Orthopaedics and sports medicine; Sports medicine and exercise clinic Haarlem (SBK)</p> <p>Tol, J; Academic Center for Evidence-based Sports medicine (ACES), Amsterdam UMC; Aspetar Orthopaedic and Sports Medicine Hospital</p> |
| <b>Primary Subject Heading</b>: | Sports and exercise medicine                                                                                                                                                                                                                                                                                                                                                                                                                                                                                                                                                                                                                                                                                                                                                                                                                                                                                                                                                                                                                                                                                                                                                                                                                                                                                                                                                                                                                                                                                                                                                                                                          |
| Secondary Subject Heading:      | Surgery, Sports and exercise medicine                                                                                                                                                                                                                                                                                                                                                                                                                                                                                                                                                                                                                                                                                                                                                                                                                                                                                                                                                                                                                                                                                                                                                                                                                                                                                                                                                                                                                                                                                                                                                                                                 |
| Keywords:                       | Foot & ankle < ORTHOPAEDIC & TRAUMA SURGERY, SPORTS MEDICINE, ORTHOPAEDIC & TRAUMA SURGERY, Platelet-rich Plasma, Osteoarthritis, Ankle Osteoarthritis                                                                                                                                                                                                                                                                                                                                                                                                                                                                                                                                                                                                                                                                                                                                                                                                                                                                                                                                                                                                                                                                                                                                                                                                                                                                                                                                                                                                                                                                                |

1  
2  
3  
4  
5  
6  
7  
8  
9  
10  
11  
12  
13  
14  
15  
16  
17  
18  
19  
20  
21  
22  
23  
24  
25  
26  
27  
28  
29  
30  
31  
32  
33  
34  
35  
36  
37  
38  
39  
40  
41  
42  
43  
44  
45  
46  
47  
48  
49  
50  
51  
52  
53  
54  
55  
56  
57  
58  
59  
60



SCHOLARONE™  
Manuscripts

# 1 Platelet Rich plasma Injection Management for Ankle osteoarthritis study 2 (PRIMA)

## 3 Protocol of a Dutch multi-center, stratified, block-randomized, double-blind, 4 placebo-controlled trial

5 Authors: L.D.A. Paget<sup>1,2,3</sup>, S.M.A. Bierma – Zeinstra<sup>4,5</sup>, S. Goedegebuure<sup>2,6</sup>, G.M.M.J. Kerkhoffs<sup>1,2,3</sup>, R.  
6 Krips<sup>7</sup>, M. Maas<sup>3,8,9</sup>, M. H. Moen<sup>6,10</sup>, G. Reurink<sup>1,2,3,6</sup>, S. A. S. Stufkens<sup>1,2,3</sup>, R.J. de Vos<sup>5</sup>, A. Weir<sup>5,12,13</sup>,  
7 J.L. Tol<sup>1,2,3,6,11</sup>

- 10 1. Department of Orthopaedic Surgery, Amsterdam UMC, University of Amsterdam,  
11 Amsterdam Movement Sciences, Amsterdam, the Netherlands.
- 12 2. Academic Center for Evidence-based Sports medicine (ACES), Amsterdam UMC, Amsterdam,  
13 the Netherlands
- 14 3. Amsterdam Collaboration for Health and Safety in Sports (ACHSS), AMC/VUmc IOC Research  
15 Center, Amsterdam, the Netherlands
- 16 4. Department of General Practice, Erasmus University Medical Center, Rotterdam, The  
17 Netherlands
- 18 5. Department of Orthopaedics and Sports Medicine, Erasmus University Medical Center,  
19 Rotterdam, The Netherlands
- 20 6. The Sport Physician Group, Department of Sports Medicine, OLVG, Amsterdam, The  
21 Netherlands
- 22 7. Department of Orthopaedic Surgery, Flevoziekenhuis, Almere, The Netherlands
- 23 8. Department of Musculoskeletal Radiology, The Netherlands
- 24 9. Musculoskeletal Imaging Quantification Center (MIQC), The Netherlands.
- 25 10. Department of Sports Medicine, Bergman Clinics, Naarden, the Netherlands
- 26 11. Aspetar, Orthopaedic and Sports Medicine Hospital, Doha, Qatar
- 27 12. Aspetar Sports Groin Pain Centre, Orthopaedic and Sports Medicine Hospital, Doha, Qatar
- 28 13. Sport medicine and exercise clinic Haarlem (SBK). Haarlem, The Netherlands.

### 33 Correspondence

34 Liam. D.A. Paget

35 Department of Orthopaedic Surgery,

36 Amsterdam UMC

37 PO Box 22660, 1100 DD Amsterdam

38 The Netherlands

39 [L.d.paget@amsterdamumc.nl](mailto:L.d.paget@amsterdamumc.nl)

## 40 **ABSTRACT**

### 41 **Introduction**

42 PRP is a potentially efficacious treatment for ankle OA but its use has not been examined in high  
43 quality studies. Systematic reviews show that platelet-rich plasma (PRP) injections significantly  
44 decrease pain and improve function in knee OA patients. Ankle OA is more common than hip or knee  
45 OA in the young active population; with a prevalence of 3.4%.

46 PRP injections in ankle OA are shown to be safe and improve quality of life over time, but no  
47 randomised controlled trial has been conducted. Our randomised controlled trial will evaluate the  
48 efficacy of PRP injections for symptom reduction and functional improvement, compared to placebo,  
49 in the treatment of ankle (talocrural) OA.

### 50 **Methods and analysis**

51 We will conduct the Platelet Rich plasma Injection Management for Ankle osteoarthritis (PRIMA)  
52 study: a multicentre, randomised, placebo-controlled trial. One hundred patients suffering from  
53 ankle OA will be randomised into two treatment groups: PRP injection or placebo (saline) injection.  
54 Both groups will receive two injections of PRP or placebo at an interval of 6 weeks. Primary outcome  
55 is the American Orthopaedic Foot and Ankle Society (AOFAS) score at 26 weeks. Secondary outcomes  
56 determined at several follow-up moments up to 5 years, include Ankle Osteoarthritis Score (AOS),  
57 Foot and Ankle Outcome Score (FAOS), pain sub-scale of AOFAS (0-40), VAS score (VAS 0-100), Ankle  
58 activity score (AAS 0-10), Subjective patient satisfaction Short form Survey-36 (SF-36), Global  
59 Attainment Scaling (GAS) and the EQ-5D-3L utility score. A cost-effectiveness analysis will be  
60 performed at 1 year.

### 61 **Ethics and dissemination**

62 The study is approved by the Medical Ethics Review Committee Amsterdam Medical Center, the  
63 Netherlands (ABR 2018-042, approved 23-7-2018) and registered in the Netherlands trial register  
64 (NTR 7261). Results and new knowledge will be disseminated through the Dutch Arthritis Association

1  
2  
3 65 (ReumaNederland), Dutch patient federation, conferences and published in a scientific peer-  
4  
5 66 reviewed journal.  
6  
7

8 67 **Trial registration number**  
9

10 68 (NTR7261)  
11  
12

13 69  
14

15 70  
16  
17  
18  
19  
20  
21  
22  
23  
24  
25  
26  
27  
28  
29  
30  
31  
32  
33  
34  
35  
36  
37  
38  
39  
40  
41  
42  
43  
44  
45  
46  
47  
48  
49  
50  
51  
52  
53  
54  
55  
56  
57  
58  
59  
60

For peer review only



1  
2  
3 71 **STRENGTH AND LIMITATIONS**

- 4  
5 72 - This is the first study to evaluate the efficacy and cost-effectiveness of ankle (talocrural) OA in  
6  
7 73 a multi-center, stratified, block-randomized, double-blind, placebo-controlled trial design.  
8  
9 74 - A positive study outcome will have a significant effect on widespread availability and  
10  
11 75 nationwide implementation of an intra articular injection treatment for ankle OA with PRP. A  
12  
13 76 negative outcome (no effect of PRP), will prevent the widespread use of a non-efficacious  
14  
15 77 treatment on patients.  
16  
17 78 - The study population consists only of patients with isolated ankle OA and no concomitant OA  
18  
19 79 in other major joints of the lower extremities that negatively affects their daily activity level  
20  
21  
22 80 - The PRP used in this randomised controlled trial is an available PRP product that is used in  
23  
24 81 clinical practise. However, there is a multitude of commercial PRP products available that differ  
25  
26 82 in their production method and content, and different treatment regimens regarding dose,  
27  
28 83 timing and number of injections are used in clinical practise. The generalizability to other PRP  
29  
30 84 products and treatment regimens remains unknown.  
31  
32  
33 85 - The composition of PRP will not be analysed. This decision was based on the fact that PRP  
34  
35 86 preparation and composition has frequently been analysed and is typically not performed in  
36  
37 87 clinical practice prior to injection.  
38  
39  
40  
41 88

## 89 BACKGROUND AND RATIONALE

90 PRP is a potentially efficacious treatment for ankle OA but its use has not been examined in high  
91 quality studies. Ankle OA is more common than hip or knee OA in the young active population.<sup>1</sup> The  
92 incidence of symptomatic ankle OA is estimated to be 3.4% in the general adult population.<sup>1</sup> Patients  
93 with ankle OA have a quality of life and physical functioning comparable with hip OA, end-stage  
94 kidney disease or congestive heart failure.<sup>2</sup> These relatively young (predominantly female) patients  
95 have an increased risk for decreased work participation and family care. The available surgical  
96 intervention (arthrodesis) is associated with significant functional limitations. In contrast to hip and  
97 knee OA, where joint replacement is an excellent surgical alternative for severe cases, there is a clear  
98 need for effective non-surgical interventions in ankle OA.

99  
100 Platelet Rich Plasma (PRP) is defined as plasma containing a concentration of at least 1,000,000  
101 platelets/ $\mu\text{l}$ .<sup>3</sup> Growth factors are stored in  $\alpha$ -granules within platelets, and are released in a selective  
102 manner upon activation. Growth factors released from the  $\alpha$ -granules of platelets are assumed to  
103 provide the regenerative benefits of PRP.

104 Recent reviews concluded that in animal models PRP can diminish multiple inflammatory IL-1  
105 mediated effects.<sup>4</sup> Due to this local anti-inflammatory response, PRP might have an indirect analgesic  
106 effect. The second suggested effect might be protection of the cartilage from destructive pro-  
107 inflammatory interleukines. This is mediated due to an increased mRNA expression of proteoglycan  
108 core protein in the articular cartilage and decreased chondrocyte apoptosis.<sup>4</sup> Consequently, PRP  
109 could positively influence the collagen network of the cartilage.

110  
111 Recent systematic reviews on the intra-articular injection therapy in ankle OA found a lack of  
112 evidence from high quality studies to assist in clinical decision-making.<sup>5,6</sup> When compared to placebo  
113 injections, hyaluronic acid or corticosteroid injections, PRP injections might significantly decrease

1  
2  
3 114 pain and improve function in knee OA patients.<sup>7-9</sup> Given the clinical effect on pain reduction in knee  
4  
5 115 OA and a good safety profile, PRP is a promising non-surgical therapy for ankle OA.<sup>10,11</sup> PRP might  
6  
7 116 delay the irreversible surgical options like arthrodesis. No significant adverse events have been  
8  
9  
10 117 reported in any PRP trials regarding ankle OA, knee OA, acute hamstring injuries or Achilles  
11  
12 118 tendinopathy.<sup>8,12-17</sup> Clinical studies on PRP in ankle OA are limited to a single report of 5 cases and a  
13  
14 119 prospective case series of 20 subjects, which both showed safety and significant reduction of pain at  
15  
16 120 a mean of 16 months and 12 weeks follow-up.<sup>14,18</sup> Well-designed prospective Randomised controlled  
17  
18 121 trials (RCT) have not yet been performed.  
19  
20  
21  
22

23  
24  
25  
26  
27  
28  
29  
30  
31  
32  
33  
34  
35  
36  
37  
38  
39  
40  
41  
42  
43  
44  
45  
46  
47  
48  
49  
50  
51  
52  
53  
54  
55  
56  
57  
58  
59  
60

## 123 **METHODS AND DESIGN**

### 124 **Objectives**

125 We aim to determine the efficacy of PRP injections in the management of ankle OA by comparing 2  
126 groups, both receiving 2 injections of either: PRP or placebo solution. We hypothesize that PRP  
127 injections are efficacious for symptom reduction and functional improvement compared to placebo  
128 in the treatment of ankle (talocrural) OA.

### 130 **Study Design**

131 The PRIMA study is a multi-center, stratified, block-randomized, double-blind, placebo-controlled  
132 trial design will be conducted in order to compare two treatment groups: PRP vs Placebo (saline).  
133 After the 26 weeks follow-up of the last patient in the study, the principal investigator and  
134 coordinating researcher will be unblinded only after the analysis of the primary outcome. A flow  
135 chart of the design and follow-up is shown in figure 1. The study included its first patient in August  
136 2018 and aims to include the last patient by January 2021, consequently allowing analysis and then  
137 debinding to commence after the last follow-up (26 weeks) of the last patient by July 2021.

### 139 **Patient involvement**

140 *Active patient involvement through reviewing the proposal (Reviewer level):*

141 Active involvement of patients during the design phase was performed by 2 patients with ankle OA.  
142 Both reviewed the grant proposal and provided feedback.

144 *Execution phase - patients will actively contribute:*

145 Active patient involvement will be secured by invitation of at least 2 patients for the annual trial  
146 monitoring and evaluation meetings (Informant level).

147

1  
2  
3 148 *Analysis phase - Patient will review and interpret the results (reviewer level):*  
4  
5

6 149 Using the blinded codes of the randomisation groups and after breaking the randomisation code,  
7

8 150 patients (also active in the design phase) will be given the opportunity to interpret the results from a  
9

10 151 patient perspective.  
11  
12

13 152  
14  
15

16 153 *Dissemination phase - Patient oriented approach (Advisor level):*  
17

18  
19 154 Results and new knowledge will be disseminated through the Dutch Arthritis Association  
20

21 155 (ReumaNederland), the Dutch patient federation, conferences and published in a scientific peer-  
22

23 156 reviewed journal. Dissemination activities will comprise a social media strategy with active patient  
24

25 157 involvement to share results with online patient communities and an events attendance strategy  
26

27 158 enabling patient participation in seminars, conferences and workshops.  
28  
29

30 159  
31  
32

33 160 **Fig.1 illustrating** the PRIMA multicentre randomized controlled trial design and follow-up procedure  
34  
35

36 161  
37

## 38 162 **Study Population**

### 39 163 **Population (base)**

40  
41  
42  
43 164 Patients with ankle OA in University Medical Centres, teaching hospitals, general hospitals and  
44

45 165 private specialist clinics will be informed about the study. In order to participate, patients must meet  
46

47 166 the eligibility criteria documented below.  
48  
49

50 167  
51  
52

### 53 168 **Inclusion criteria**

54  
55  
56 169 1. Severity of Ankle OA pain on a visual analogue scale (VAS) (0–100 mm)  $\geq$  40 mm during daily  
57

58 170 activities  
59  
60

- 1  
2  
3 171 2. X-rays (AP and lateral view) indicating  $\geq$  grade 2 talocrural OA on the Van Dijk classification  
4  
5 172 (clarified under section Radiographs)<sup>19</sup>  
6  
7 173 3. Age  $\geq$  18 years  
8  
9

10 174

11  
12 175 **Exclusion criteria**

- 13  
14  
15 176 1. Patient has received injection therapy for ankle OA in the previous 6 months  
16  
17 177 2. Patient does not want to receive one of the two therapies  
18  
19 178 3. Patient has clinical signs of concomitant OA of one or more other major joints of the lower  
20  
21 179 extremities that negatively affects their daily activity level  
22  
23 180 4. Previous ankle surgery for OA or Osteochondral defects (OCD) < 1 year (not including surgery  
24  
25 181 for an ankle fracture in the past)  
26  
27  
28  
29 182

30  
31 183 **Radiographs**

32  
33 184 AP and lateral X-rays of the talocrural joints will be scored according to the Van Dijk classification:<sup>19</sup>

- 34  
35  
36 185 0) Normal joint or subchondral sclerosis  
37  
38 186 1) Osteophytes without joint space narrowing  
39  
40 187 2) Joint space narrowing with or without osteophytes  
41  
42 188 3) (Sub)total disappearance or deformation of the joint space  
43  
44  
45

46 189

47  
48  
49 190 **Randomisation, Blinding and Treatment Allocation**

50  
51 191 We will include patients at the centre of their first outpatient clinic appointment. For each patient  
52  
53 192 the coordinating researcher will prepare a syringe with PRP and a syringe with placebo (isotonic  
54  
55 193 saline: 0.9% sodium chloride). A Good Clinical Practice (GCP) approved data management system  
56  
57 194 (Castor EDC, based in Amsterdam, the Netherlands) will be used to perform a computer generated  
58  
59  
60

1  
2  
3 195 block randomisation scheme with patients stratified to centre with a variable block size of 2,4 or 6.  
4  
5 196 This procedure will ensure treatment allocation concealment. The coordinating researcher, treating  
6  
7 197 physician and patient all remain blinded to the allocated intervention. An independent researcher  
8  
9 198 from the coordinating location will have access to the randomization result and the allocated  
10  
11 199 intervention. This will be relayed to a GCP-certified research assistant at the centre. The research  
12  
13 200 assistant then selects one of the two syringes based on the allocated intervention and blinds the  
14  
15 201 syringe with a covering sheath, ensuring concealment of the content of the syringe. The patients,  
16  
17 202 treating physicians, and coordinating researcher will all be blinded to the allocation of the  
18  
19 203 intervention and to the contents of the syringe. The success of blinding will be assessed by asking  
20  
21 204 patients which injection they think they have received just after the injection procedure, this will  
22  
23 205 then be registered accordingly.  
24  
25  
26  
27  
28  
29

30 207 After the 26 weeks follow-up of the last patient in the study, the principal investigator and  
31  
32 208 coordinating researcher will be unblinded only after the analysis of the primary outcome. The  
33  
34 209 patients will remain blinded to the therapy until the 52 weeks follow-up (online questionnaire-  
35  
36 210 appendix 1) of the last patient in the study.  
37  
38

### 39 211 **Intervention**

40 212 In this study, patients will be randomised into two treatment groups: PRP injection or placebo saline  
41  
42 213 injection. For each patient the coordinating researcher will prepare a PRP and a placebo injection  
43  
44 214 (isotonic saline: 0.9% sodium chloride). The PRP syringe will be prepared according to the  
45  
46 215 instructions of the manufacturer.<sup>12</sup> Prior to commencement of the study, the coordinating researcher  
47  
48 216 was trained by a representative of Arthrex, as well as two experienced members of the PRIMA trial  
49  
50 217 research group (GR and RJdV) with a vast scientific experience regarding PRP preparation and  
51  
52 218 injection.<sup>12,13</sup> The PRP will be prepared using a widely used and commercially available system  
53  
54 219 (Arthrex double syringe PRP system, Arthrex Medizinische Instrumente GmbH, Garching, Germany).  
55  
56  
57  
58  
59  
60

1  
2  
3 220 One syringe of 15ml autologous blood will be collected twice from the cubital vein: at inclusion and  
4  
5 221 at a time interval of 6 weeks. After blood collection the syringe will undergo 5 minutes of  
6  
7 222 centrifugation and the injection will be given within 30 minutes following venepuncture to prevent  
8  
9 223 formation of blood clots. No additional substances (calcium, thrombin or citrate) will be added to the  
10  
11 224 PRP solution. For each procedure, 2 ml of PRP or placebo will be prepared and injected into the  
12  
13 225 affected ankle joint under ultrasonographic guidance using a sterile technique. All patients will  
14  
15 226 receive a second injection at 6 weeks, regardless of the effect of the first injection. To guarantee  
16  
17 227 blinding for the allocated treatment of the patient, treatment assessor and treating physician, blood  
18  
19 228 will be drawn and both PRP and placebo will be prepared according to exactly the same procedure  
20  
21 229 for each patient (both at inclusion and at a time interval of 6 weeks after the first injection).  
22  
23 230 However, in the control group, patients will be injected with 2ml of physiological saline instead of  
24  
25 231 PRP. An unblinded research assistant will blind one of the two identical syringes based on the  
26  
27 232 allocated intervention using a specially manufactured covering sheath in order to conceal  
28  
29 233 randomization. Following the intra-articular injection, the syringe covered by the sheath (containing  
30  
31 234 either the remnants of the PRP or saline), is handed to the unblinded research assistant, who will  
32  
33 235 dispose of the syringe, therefore keeping the treating physician and coordinating researcher blinded.  
34  
35 236 After the intervention, patients are advised to avoid heavy or repetitive stress to the ankle joint for a  
36  
37 237 period of 48 hours. Furthermore, patients receive a leaflet containing usual-care healthy lifestyle  
38  
39 238 advice beneficial for ankle OA. This includes losing weight and exercise (avoiding heavy or repetitive  
40  
41 239 ankle loading exercises) such as walking, cycling or swimming.  
42  
43  
44  
45  
46  
47  
48  
49  
50  
51  
52  
53  
54  
55  
56  
57  
58  
59  
60



### 242 **Use of co-intervention**

243 Patients are instructed to avoid the use of co-interventions and non-steroidal anti-inflammatory  
244 drugs if possible, 24 hours prior to the intervention and if possible up to a year after the first  
245 injection. Throughout the study, key treatment (including usual care: exercise therapy and healthy  
246 life style advice) and co-interventions used by patients will be registered, such as non-steroidal anti-  
247 Inflammatory drugs, other analgesic drugs, intra-articular injections or inlays.

248

### 249 **Study Procedures**

250 In the event the patient meets the criteria for inclusion and exclusion, the patient will be informed in  
251 more detail about the study procedure. At that time the patient can ask questions about the study  
252 and decide whether they will participate and sign the informed consent form. Subsequently the  
253 patient will proceed to inclusion and the randomization procedure.

254

### 255 **Inclusion**

256 Patients are recruited for inclusion by their treating physicians at location. Following inclusion PRP  
257 will be prepared according to the PRP system instructions of the manufacturer. During the first two  
258 consultations a total of two intra-articular injections will be documented with a time interval of 6  
259 weeks. The patient will have no additional costs to usual care as a result of taking part in this study.

260 Physical examination will be performed on three occasions up to 26 weeks from baseline. Patient

261 Reported Outcome Measures (PROMs) will be used to evaluate the treatment effect up to five years.

262 A cost-effectivity analysis will be performed at one year using the PRODISQ questionnaire. The time-  
263 frame of the follow-up questionnaires is further illustrated in table 1. Questionnaires will be

264 managed and distributed digitally using a GCP approved data management system (Castor EDC)

265

266

| Follow-up |                                                                                                                                                                                                  |
|-----------|--------------------------------------------------------------------------------------------------------------------------------------------------------------------------------------------------|
| Baseline  | <ul style="list-style-type: none"> <li>- 1<sup>st</sup> intervention injections</li> <li>- Physical Examination</li> <li>- AOFAS</li> <li>- PROMs</li> <li>- PRODISQ cost-effectivity</li> </ul> |
| 6 weeks   | <ul style="list-style-type: none"> <li>- 2<sup>nd</sup> intervention injection</li> <li>- Physical Examination</li> <li>- AOFAS</li> <li>- PROMs</li> </ul>                                      |
| 12 weeks  | <ul style="list-style-type: none"> <li>- AOFAS</li> <li>- PROMs</li> <li>- PRODISQ cost-effectivity</li> </ul>                                                                                   |
| 26 weeks  | <ul style="list-style-type: none"> <li>- AOFAS</li> <li>- PROMs</li> <li>- PRODISQ cost-effectivity</li> </ul>                                                                                   |
| 39 weeks  | <ul style="list-style-type: none"> <li>- PRODISQ cost-effectivity</li> </ul>                                                                                                                     |
| 52 weeks  | <ul style="list-style-type: none"> <li>- AOFAS</li> <li>- PROMs</li> <li>- PRODISQ cost-effectivity</li> </ul>                                                                                   |
| 5 years   | <ul style="list-style-type: none"> <li>- AOFAS</li> <li>- PROMs</li> </ul>                                                                                                                       |

267 *Table 1. In addition to the American Orthopaedic Foot and Ankle Society (AOFAS) score, the following*  
268 *PROMs will be taken: Foot and Ankle Outcome Score (FAOS), Ankle Osteoarthritis Score (AOS), Visual*  
269 *Analogue Scale (VAS), Ankle activity score (AAS), Subjective patient satisfaction, Short Form Health*  
270 *Survey (SF-36), The Global Attainment Scaling (GAS), EuroQol-5 dimensions-3 levels (EQ-5D-3L). These*  
271 *PROMs will be elaborated on further on. Furthermore the PROductivity and DISease Questionnaire*  
272 *(PRODISQ) will be used to perform a cost-effectivity analysis. These questionnaires can be found in*  
273 *appendix 1*

274

### 275 **Replacement of individual patients after withdrawal**

276 In the sample size calculation we compensated for an expected loss of 10% of patients to follow-up.

277 No patients will be replaced after withdrawal.

278

### 279 **Safety**

1  
2  
3 280 All adverse events reported spontaneously by the patient or observed by the investigator or his staff  
4  
5 281 will be recorded. A variety of conditions have been treated with PRP ranging from muscle and tendon  
6  
7 282 injuries to intra-articular injections of the knee and ankle. To date, no serious adverse events have  
8  
9 283 been documented in the literature, concerning PRP intra-articular injections of the ankle. In  
10  
11 284 accordance with the Central Committee on Research Involving Human Subjects (CCMO) guidelines,  
12  
13 285 this study was classified as low-risk for adverse events. Therefore, the local Medical Ethical  
14  
15 286 Commission will be notified of any serious adverse events. In the event this happens, the advice of  
16  
17 287 the Medical Ethical Commission will be followed accordingly.  
18  
19  
20  
21  
22  
23

## 24 289 **Outcome Measures**

### 27 290 **Primary study parameter/endpoint**

28  
29 291 The primary objective of this study will be to quantify pain or functional improvement using the  
30  
31 292 American Orthopaedic Foot and Ankle Society (AOFAS) score at 26 weeks follow-up. Studies  
32  
33 293 evaluating the efficacy of PRP in knee OA maintained a follow-up between 3 and 12 months. We  
34  
35 294 therefore opted to take 26 weeks for our primary outcome measure.<sup>10</sup> The AOFAS is a validated scale  
36  
37 295 for ankle OA (0-100) measuring three subdomains (pain, function and alignment) which together  
38  
39 296 total nine items.<sup>20-23</sup> The subdomain of pain is measured by one item where a maximal score of 40  
40  
41 297 indicates no pain. Function consists of 7 items where full function is indicated by the maximal score  
42  
43 298 of 50 points. Similar to the pain subdomain, alignment has a potential maximum score of 10 points  
44  
45 299 using one item, indicating good alignment.<sup>20,21</sup> The AOFAS questionnaire, having undergone forward  
46  
47 300 and backward translation to Dutch by de Boer et al. 2017, has an excellent internal consistency  
48  
49 301 (Cronbach's  $\alpha$  0.947) and an excellent test-retest reliability (ICC 0.93).<sup>20</sup>  
50  
51  
52  
53  
54

### 55 302 **Secondary study parameters/endpoints**

56  
57 303 Secondary outcome measures are a number of other Patient Reported Outcome Measures (PROMs).  
58  
59 304 Specific time points of the secondary outcome measures can be found in Table 1.  
60

- 1  
2  
3 305 1. Ankle Osteoarthritis Score (AOS) is a visual analog scale from 0 – 100 mm with 18 questions;  
4  
5 306 9 relating to pain and 9 relating to disability.
- 6  
7 307 2. Foot and Ankle Outcome Score (FAOS). Each question is assigned 0 – 4 points based on the  
8  
9 308 answer given. The scale runs from 0 (extreme symptoms) to 100 points (no symptoms).
- 10 309 3. In order to evaluate pain, the pain sub-scale of AOFAS (0-40 points) will be analysed. On this  
11  
12 310 scale the lower the score the more pain the patient has. Additionally a VAS score (VAS 0-100  
13  
14 311 mm) is measured during activities of daily living, with 0 mm being no pain and 100 mm the  
15  
16 312 worst pain imaginable.
- 17  
18 313 4. Total AOFAS score at the other time points than the primary one (at 6, 12 and 52 weeks as  
19  
20 314 well as 5 years).
- 21 315 5. Ankle activity score (0-10 points) is scored according to chart based on the performable  
22  
23 316 activity level
- 24  
25 317 6. Subjective patient satisfaction (4 categories) Poor, Fair, Good, Excellent
- 26  
27 318 7. Short Form Health Survey SF-36 is a health-related quality of life score (0-100 points). The  
28  
29 319 higher the patient scores, the higher the disability.
- 30 320 8. The Global Attainment Scaling (GAS) is a method of scoring based on achievement related to  
31  
32 321 pre-determined goals in agreement with the patient. Points are subtracted for not achieving  
33  
34 322 the pre-defined goals or vice versa. Scores range from 100 (high functioning) to 0 (severely  
35  
36 323 impaired)
- 37 324 9. EuroQol-5 dimensions-3 levels (EQ-5D-3L) utility score allows a patient's health to be defined  
38  
39 325 by a 5-digit number.
- 40  
41 326 10. PROductivity and DISease Questionnaire (PRODISQ) will be used to determine indirect costs  
42  
43 327 and direct costs cost effectivity. The PRODISQ questionnaire is taken at baseline and every 3  
44  
45 328 months thereafter up until 1 year. This will be done in conjunction with the EQ-5D-3L.
- 46  
47  
48  
49  
50  
51  
52  
53  
54  
55  
56  
57  
58  
59 329  
60

#### Loss to follow-up

1  
2  
3 331 The coordinating researcher will attempt to limit loss to follow-up as much as possible by contacting  
4  
5 332 every patient and being present at every patient visit. All digital questionnaires will be constantly  
6  
7 333 monitored to ensure they are being filled in and otherwise followed-up by the coordinating  
8  
9 334 researcher. In the event of patient withdrawal, an analysis of demographic and prognostic  
10  
11 335 characteristics will be done on these cases and the remaining patients. As previously described by  
12  
13 336 Järvinen et al. 2014, we will document the patient eligible for and compliant with each follow-up.<sup>24</sup>  
14  
15  
16  
17  
18  
19  
20  
21  
22  
23  
24  
25  
26  
27  
28  
29  
30  
31  
32  
33  
34  
35  
36  
37  
38  
39  
40  
41  
42  
43  
44  
45  
46  
47  
48  
49  
50  
51  
52  
53  
54  
55  
56  
57  
58  
59  
60

For peer review only

1  
2  
3 339 **Missing items**  
4

5 340 Missing items of a score will be handled according to the instructions of the specific scales. In the  
6  
7 341 event of no instructions, we will calculate the percentage of missing items on a scale. Due to the  
8  
9 342 potential impact on trial conclusions, multiple imputation (if more than 10% missing items on a scale)  
10  
11  
12 343 will be applied.  
13

14 344  
15 345 **Sample Size**

16 346 Based on previous and ongoing studies, the study protocol of the randomised controlled trial is  
17  
18 347 designed to detect a difference of 12 points (0-100) on the AOFAS score. There is no official  
19  
20 348 agreement on the minimal clinical important difference for the AOFAS score regarding ankle OA.  
21  
22 349 However in reliable musculoskeletal literature, 10% – 15% of the used scale was reported.<sup>13,25,26</sup>  
23  
24 350 Our pre-defined minimal clinical important difference of 12 % is located within this range.<sup>13,25,26</sup>  
25  
26 351 Based on a previous placebo controlled RCT on injection therapy (hyaluronic acid) in ankle OA of De  
27  
28 352 Groot et al. a standard deviation of 16.3 can be expected.<sup>6</sup> Taking into account a two-sided level of  
29  
30 353 significance of 5%, a power of 90% and a dropout rate of 10%, approximately 50 (45 plus 10% drop  
31  
32 354 out) patients per group will be needed (N=100 in total).  
33  
34  
35

36  
37 355 **Data Management**  
38

39 356 After giving permission for participating in this study, patients will receive a link to fill in digital  
40  
41 357 surveys. All data gained outside Castor EDC will be stored on the AMC secured hard drive. All data  
42  
43 358 will be coded and stored in the Castor EDC online database which meets the AMC safety criteria and  
44  
45 359 good clinical practice guidelines. The primary investigator and project leader will safeguard the coded  
46  
47 360 data through password secured access. All patient's data will be archived for at least 15 years and  
48  
49 361 handled with in accordance with the Dutch Personal Data Protection Act (Wbp). Data protection is  
50  
51 362 provided through the safety protocol of Castor EDC with automated backups and SSL security.  
52  
53  
54  
55

56 363 **Statistical analysis**  
57

58 364 A standard operating procedure will be available to logically recode and clean the data. The data will  
59  
60 365 be interpreted according to a blinded data interpretation scheme described by Järvinen et al, 2014.<sup>24</sup>

1  
2  
3 366 A statistical expert (SB) is present among the authors. The authors will interpret the statistical results  
4  
5 367 until a consensus is reached. Once the authors are in agreement the two groups will be unblinded  
6  
7 368 and no changes will be made to the interpretation of the results.  
8  
9

#### 10 369 **Baseline characteristics**

11  
12  
13 370 Baseline characteristics will be analyzed between groups using descriptive statistics.  
14  
15

#### 16 371 **Primary outcome measure**

17  
18 372 Analysis will be performed using an intention to treat approach. To test for the effect of treatment  
19  
20 373 on the between-group difference in primary outcome, we will use a repeated measurement general  
21  
22 374 linear model. Changes from baseline to all follow-up time points will be included in the model.  
23  
24 375 Adjustments will be made for those baseline variables that influenced the primary outcome with  $p <$   
25  
26 376 0.10.  
27  
28  
29

30 377

#### 31 32 33 378 **Secondary outcome measures**

34  
35 379 To test for the effect of treatment on between-group differences in secondary outcomes, we will use  
36  
37 380 the repeated measurement general linear model. Changes from baseline to all follow-up time points  
38  
39 381 will be included in the model.  
40  
41  
42

#### 43 382 **Economic analysis**

44  
45 383 In the event of a positive significant outcome, an economic analysis is needed to support a possible  
46  
47 384 change of practice. An economic analysis (costs) will be performed in order to determine cost-  
48  
49 385 effectiveness.  
50  
51

52  
53 386 We will assess the differences in mean quality-adjusted life years (QALYs), costs, and net benefits  
54  
55 387 between the PRP injection group and the placebo group using linear models. We express the cost-  
56  
57 388 effectiveness by using cost-effectiveness acceptability curves from both a healthcare perspective and  
58  
59 389 a societal perspective. With multiple bootstrap replicates of the average difference in costs and  
60

1  
2  
3 390 effects in the incremental cost-effectiveness plane we will express the uncertainty of our cost-  
4  
5 391 effectiveness analysis.  
6  
7

8 392 The cost-effectivity analysis will be performed with a 1-year time horizon. We use the three-level  
9  
10 393 EQ-5D questionnaire (Euroqol, Rotterdam, the Netherlands) to calculate QALYs as the area under the  
11  
12 394 curve of the utility scores measured over 12 months, according to the Dutch pricing system. The  
13  
14 395 analysis will be based on indirect costs and direct costs and will be determined using the PRODISQ  
15  
16 396 questionnaire. The PRODISQ questionnaire is taken at baseline and every 3 months thereafter up  
17  
18 397 until 1 year.  
19  
20  
21

22 398

#### 23 24 25 399 **Monitoring committee**

26  
27 400 The PRIMA trial will be monitored by the clinical research unit (CRU) of the coordination study  
28  
29 401 centre. The CRU aims to improve the quality of clinical research and ultimately, patient care. Before  
30  
31 402 the PRIMA trial commenced, a monitoring plan was set-up. This Monitoring plan facilitates  
32  
33 403 compliance with the Human Research Act (WMO), Good Clinical Practice (ICH-GCP) guidelines  
34  
35 404 (5.18.1) and/ or ISO14155, which require monitors to verify that (a) the rights and well-being of  
36  
37 405 human subjects are protected,  
38  
39 406 (b) recorded study data is accurate, complete, and verifiable with the source documents,  
40  
41 407 (c) the conduct of the study is compliant with the currently approved protocol and with applicable  
42  
43 408 laws regulatory requirements, e.g. WMO, ICH-GCP, ISO14155.  
44  
45  
46  
47  
48

49 409 Throughout the study, monitoring will be performed at initiation of the trial, at each participating  
50  
51 410 centre once approximately 3 patients have been enrolled, after approximately 10 – 15 enrolled  
52  
53 411 patients have completed the 26 week follow-up, after 70 patients have been enrolled and after  
54  
55 412 database lock.  
56  
57  
58  
59  
60



## 414 **Ethics and Dissemination**

415 The study is approved by the local Medical Ethics Review Committee Amsterdam Medical Center,  
416 Amsterdam, the Netherlands (ABR 2018-042, approved 23-7-2018) and is registered in the  
417 Netherlands trial register (NTR 7261) in accordance with the World Health Organization Data Set  
418 (WHO Data Set). In the events of amendments or other changes, co-researchers will be notified. If  
419 relevant patients participating will also be notified. Intellectual data will be the property of the  
420 PRIMA study group. Participant data that underline the results reported in this article following de-  
421 identification will be shared anonymously on request following publication. Data will be shared,  
422 wherever legally and ethically possible and in line with ICMJE guidelines, with researchers who  
423 provide a methodologically sound proposal. Data will be stored in a repository (Figshare) under  
424 management of the medical library of the AMC. Any proposal should contain: Title, Background,  
425 Rationale, Objective, Methods (eligibility criteria, variables and timeframe of interest, statistical  
426 plan), Information regarding publication including authorship.

428 The results of this project study and new knowledge will be disseminated through the Dutch Arthritis  
429 Association (ReumaNederland), presentations, news publications, blogs, websites social media and  
430 professional organisations (rheumatology, orthopaedics, primary care medicine, sports medicine,  
431 public health) and the Dutch patient federation (Patiëntenfederatie Nederland). The patients will also  
432 be informed about the results of the study. The study will be conducted according to the principles of  
433 the Declaration of Helsinki, GCP and the Medical Research Involving Human Subjects Act (WMO). The  
434 board of each participating hospital reviewed and approved the local feasibility. Monitoring and  
435 auditing will be carried out throughout the study. In the event of Serious Adverse Events, these will  
436 be documented and reported to the monitor and the Medical Ethics board. Eligible patients will be  
437 informed of the study and will sign an informed consent form before participating (acquired by  
438 researchers associated with the study). Provisions for post-trial care as compensation for those who  
439 suffer harm from trial participation is documented in the patient information.

## 440 Discussion

441 This is the first study evaluating the efficacy and cost-effectiveness of Platelet-rich Plasma injections  
442 in the treatment of ankle OA with a multi-center, stratified, block-randomized, double-blind,  
443 placebo-controlled design. The primary outcome is the AOFAS score at 26 weeks. Our study will also  
444 evaluate the long term efficacy of PRP for up to five years.

445

446 Platelet-rich Plasma has been shown to alleviate symptoms of patients suffering from knee OA.<sup>11</sup> In  
447 the absence of effective evidence-based non-surgical interventions for ankle OA, PRP would fulfil a  
448 clear clinical need. Previous trials concerned with the efficacy of PRP for multiple indications are  
449 usually of low quality and adhere to a follow-up of 26 weeks or shorter. Furthermore a cost-  
450 effectiveness analysis has never been performed in previous trials on PRP in the treatment of OA.

451 A positive study outcome would have a significant impact leading to change in clinical practice, where  
452 PRP could be offered as a non-surgical intervention. A negative outcome will prevent the widespread  
453 use of a non-efficacious treatment.

454 This study has potential limitations. First of all, due to financial constraints, (semi-quantitative) MRI-  
455 defined cartilage degenerative changes will not be used as a secondary outcome score. Furthermore,  
456 the composition of PRP is not analysed. This decision is based on the fact that PRP preparation and  
457 composition has frequently been analysed and is typically not performed in clinical practice prior to  
458 injection.<sup>27</sup> The PRP we use ( Hettich Rotofix32 A centrifuge and Arthrex syringes) is one out of a  
459 multitude of commercially available PRP products. All these products differ in their production  
460 method and content, and different treatment regimens regarding dose, timing and number of  
461 injections are used in clinical practice. The generalizability to other PRP products and treatment  
462 regimens remains unknown.

463

## 464 Conclusion

1  
2  
3 465 This will be the first randomized controlled trial to assess the efficacy and cost-effectiveness of PRP in  
4  
5 466 ankle OA.

6  
7  
8 467

9  
10  
11 468 **Contributor ship statement**

12  
13 469 All authors have been actively involved in creating and writing the study protocol, and all authors  
14  
15 470 critically commented on the paper and gave their final approval of the version that we submitted.

16  
17 471 *Authorship was and for future publications will be, determined according to the ICMJE authorship*  
18  
19 472 *recommendations:*

20  
21  
22  
23 473 “Substantial contributions to the conception or design of the work; the acquisition, analysis, or  
24  
25 474 interpretation of data for the work;

26  
27  
28 475 L.D.A. Paget, S.M.A. Bierma – Zeinstra, S. Goedegebuure, G.M.M.J. Kerkhoffs, R. Krips, M. Maas, M.

29  
30 476 H. Moen, G. Reurink, S. A. S. Stufkens, R.J. de Vos, A. Weir, J.L. Tol

31  
32  
33 477 Drafting the work or revising it critically for important intellectual content;

34  
35 478 L.D.A. Paget S.M.A. Bierma – Zeinstra, G.M.M.J. Kerkhoffs, G. Reurink, R.J. de Vos, A. Weir, J.L. Tol

36  
37  
38 479 Final approval of the version to be published;

39  
40  
41 480 L.D.A. Paget, S.M.A. Bierma – Zeinstra, S. Goedegebuure, G.M.M.J. Kerkhoffs, R. Krips, M. Maas, M.

42  
43 481 H. Moen, G. Reurink, S. A. S. Stufkens, R.J. de Vos, A. Weir, J.L. Tol

44  
45  
46 482 Agreement to be accountable for all aspects of the work in ensuring that questions related to the  
47  
48 483 accuracy or integrity of any part of the work are appropriately investigated and resolved.

49  
50  
51 484 L.D.A. Paget, S.M.A. Bierma – Zeinstra, S. Goedegebuure, G.M.M.J. Kerkhoffs, R. Krips, M. Maas, M.

52  
53 485 H. Moen, G. Reurink, S. A. S. Stufkens, R.J. de Vos, A. Weir, J.L. Tol

54  
55  
56 486

57  
58  
59 487

1  
2  
3 488 **Competing interests**  
4  
5

6 489 All authors have completed the ICMJE uniform disclosure form at [www.icmje.org/coi\\_disclosure.pdf](http://www.icmje.org/coi_disclosure.pdf)  
7  
8 490 and declare: no support from any organisation for the submitted work; no financial relationships with  
9  
10 491 any organisations that might have an interest in the submitted work in the previous three years; no  
11  
12 492 other relationships or activities that could appear to have influenced the submitted work.  
13  
14

15 493  
16

17  
18 494 **Funding**  
19

20  
21 495 This multicenter Randomized Controlled Trial was supported by a grant from the Dutch Arthritis  
22  
23 496 Foundation (ReumaNederland). The Dutch Arthritis Foundation will not, and has not had any role  
24  
25 497 regarding study design, collection, management, analysis, data interpretation or writing of the  
26  
27 498 report. Furthermore, the Dutch Arthritis Foundation does not have authority over report submission  
28  
29 499 or publication.  
30  
31

32  
33  
34 500 **Figure legends/captions**  
35

36 501 Fig.1 illustrating the PRIMA multicentre randomized controlled trial design and follow-up procedure  
37  
38  
39  
40  
41  
42  
43  
44  
45  
46  
47  
48  
49  
50  
51  
52  
53  
54  
55  
56  
57  
58  
59  
60

502 **References**

- 1  
2  
3  
4  
5  
6 503 1. Murray C, Marshall M, Rathod T, Bowen CJ, Menz HB, Roddy E. Population prevalence and  
7 504 distribution of ankle pain and symptomatic radiographic ankle osteoarthritis in  
8 505 community dwelling older adults: A systematic review and cross-sectional study. *PLoS*  
9 506 *One*. 2018. doi:10.1371/journal.pone.0193662
- 10  
11  
12 507 2. Saltzman CL. Impact of Comorbidities on the Measurement of Health in Patients with  
13 508 Ankle Osteoarthritis. *J Bone Jt Surg*. 2006;88(11):2366. doi:10.2106/JBJS.F.00295
- 14  
15  
16 509 3. Marx RE. Platelet-rich plasma (PRP): What is PRP and what is not PRP? *Implant Dent*.  
17 510 2001. doi:10.1097/00008505-200110000-00002
- 18  
19  
20 511 4. Zhu Y, Yuan M, Meng HY, et al. Basic science and clinical application of platelet-rich  
21 512 plasma for cartilage defects and osteoarthritis: A review. *Osteoarthr Cartil*.  
22 513 2013;21(11):1627-1637. doi:10.1016/j.joca.2013.07.017
- 23  
24  
25 514 5. Vannabouathong C, Del Fabbro G, Sales B, et al. Intra-articular Injections in the Treatment  
26 515 of Symptoms from Ankle Arthritis: A Systematic Review. *Foot Ankle Int*.  
27 516 2018;107110071877937. doi:10.1177/1071100718779375
- 28  
29  
30 517 6. DeGroot H, Uzunishvili S, Weir R, Al-omari A, Gomes B. Intra-articular injection of  
31 518 hyaluronic acid is not superior to saline solution injection for ankle arthritis: a  
32 519 randomized, double-blind, placebo-controlled study. *J Bone Joint Surg Am*. 2012;94(1):2-  
33 520 8. doi:10.2106/JBJS.J.01763
- 34  
35  
36 521 7. Meheux CJ, McCulloch PC, Lintner DM, Varner KE, Harris JD. Efficacy of Intra-articular  
37 522 Platelet-Rich Plasma Injections in Knee Osteoarthritis: A Systematic Review. *Arthrosc - J*  
38 523 *Arthrosc Relat Surg*. 2016;32(3):495-505. doi:10.1016/j.arthro.2015.08.005
- 39  
40  
41 524 8. Laudy ABM, Bakker EWP, Rekers M, Moen MH. Efficacy of platelet-rich plasma injections  
42 525 in osteoarthritis of the knee: a systematic review and meta-analysis. *Br J Sports Med*.  
43 526 2015;49(10):657-672. doi:10.1136/bjsports-2014-094036
- 44  
45  
46 527 9. Moen M, Weir A, Bakker E, Rekers M, Laudy G. Efficacy of platelet-rich plasma injections  
47 528 in osteoarthritis of the knee: an updated systematic review and meta-analysis. *Osteoarthr*  
48 529 *Cartil*. 2016;24:S520-S521. doi:10.1016/j.joca.2016.01.953
- 49  
50  
51 530 10. Xing D, Wang B, Zhang W, et al. Intra-articular platelet-rich plasma injections for knee  
52 531 osteoarthritis: An overview of systematic reviews and risk of bias considerations. *Int J*  
53 532 *Rheum Dis*. 2017;20(11):1612-1630. doi:10.1111/1756-185X.13233
- 54  
55  
56 533 11. Dai WL, Zhou AG, Zhang H, Zhang J. Efficacy of Platelet-Rich Plasma in the Treatment of  
57 534 Knee Osteoarthritis: A Meta-analysis of Randomized Controlled Trials. *Arthrosc - J*  
58 535 *Arthrosc Relat Surg*. 2017. doi:10.1016/j.arthro.2016.09.024
- 59  
60 536 12. Reurink G, Goudswaard GJ, Moen MH, et al. Platelet-Rich Plasma Injections in Acute

- 1  
2  
3 537 Muscle Injury. *N Engl J Med*. 2014;370(26):2546-2547. doi:10.1056/NEJMc1402340  
4  
5  
6 538 13. de Vos RJ, Weir A, van Schie HTM, et al. Platelet-rich plasma injection for chronic Achilles  
7 539 tendinopathy: a randomized controlled trial. *JAMA*. 2010;303(2):144-149.  
8 540 doi:10.1001/jama.2009.1986  
9  
10  
11 541 14. Fukawa T, Yamaguchi S, Akatsu Y, Yamamoto Y, Akagi R, Sasho T. Safety and Efficacy of  
12 542 Intra-articular Injection of Platelet-Rich Plasma in Patients With Ankle Osteoarthritis.  
13 543 *Foot Ankle Int*. 2017;38(6):596-604. doi:10.1177/1071100717700377  
14  
15  
16 544 15. Repetto I, Biti B, Cerruti P, Trentini R, Felli L. Conservative Treatment of Ankle  
17 545 Osteoarthritis: Can Platelet-Rich Plasma Effectively Postpone Surgery? *J Foot Ankle Surg*.  
18 546 2017;56(2):362-365. doi:10.1053/j.jfas.2016.11.015  
19  
20  
21 547 16. Pas HI, Reurink G, Tol JL, Weir A, Winters M, Moen MH. Efficacy of rehabilitation  
22 548 (lengthening) exercises, platelet-rich plasma injections, and other conservative  
23 549 interventions in acute hamstring injuries: an updated systematic review and meta-  
24 550 analysis. *Br J Sports Med*. 2015;49(18):1197-1205. doi:10.1136/bjsports-2015-094879  
25  
26  
27 551 17. Hamilton B, Tol JL, Almusa E, et al. Platelet-rich plasma does not enhance return to play in  
28 552 hamstring injuries: a randomised controlled trial. *Br J Sports Med*. 2015;49(14):943-950.  
29 553 doi:10.1136/bjsports-2015-094603  
30  
31  
32 554 18. Angthong C, Khadsongkram A, Angthong W. Outcomes and quality of life after platelet-  
33 555 rich plasma therapy in patients with recalcitrant hindfoot and ankle diseases: A  
34 556 preliminary report of 12 patients. *J Foot Ankle Surg*. 2013;52(4):475-480.  
35 557 doi:10.1053/j.jfas.2013.04.005  
36  
37  
38 558 19. van Dijk CN, Verhagen R a, Tol JL. Arthroscopy for problems after ankle fracture. *J Bone Jt*  
39 559 *Surg*. 1997;79-B(2):280-284. doi:10.1302/0301-620X.79B2.7153  
40  
41  
42 560 20. De Boer AS, Tjioe RJC, Van Der Sijde F, et al. The American Orthopaedic Foot and Ankle  
43 561 Society Ankle-Hindfoot Scale; Translation and validation of the Dutch language version  
44 562 for ankle fractures. *BMJ Open*. 2017;7(8):1-12. doi:10.1136/bmjopen-2017-017040  
45  
46  
47 563 21. Kitaoka HB, Alexander IJ, Adelaar RS, Nunley JA, Myerson MS, Sanders M. Clinical rating  
48 564 systems for the ankle-hindfoot, midfoot, hallux, and lesser toes. *Foot ankle Int*.  
49 565 1994;15(7):349-353. doi:10.1177/107110079401500701  
50  
51  
52 566 22. Sayyed-Hosseini S-H, Hassankhani GG, Bagheri F, Alavi N, Shojaie B, Mousavian A.  
53 567 Validation of the Persian Version of the American Orthopedic Foot and Ankle Society  
54 568 Score (AOFAS) Questionnaire. *Arch bone Jt Surg*. 2018;6(3):233-239.  
55 569 doi:10.1097/PHM.0000000000000234  
56  
57  
58 570 23. Vosoughi AR, Roustaei N, Mahdaviazad H. American Orthopaedic Foot and Ankle Society  
59 571 ankle-hindfoot scale: A cross-cultural adaptation and validation study from Iran. *Foot*  
60 572 *Ankle Surg*. 2018. doi:10.1016/j.fas.2017.02.007

- 1  
2  
3 573 24. Järvinen TLN, Sihvonen R, Bhandari M, et al. Blinded interpretation of study results can  
4 574 feasibly and effectively diminish interpretation bias. *J Clin Epidemiol*. 2014;67(7):769-  
5 575 772. doi:10.1016/j.jclinepi.2013.11.011  
6  
7  
8 576 25. Pham T, van der Heijde D, Altman RD, et al. OMERACT-OARSI initiative: Osteoarthritis  
9 577 research society international set of responder criteria for osteoarthritis clinical trials  
10 578 revisited. *Osteoarthr Cartil*. 2004. doi:10.1016/j.joca.2004.02.001  
11  
12  
13 579 26. Rozendaal RM, Koes BW, Van Osch GJVM, et al. Effect of glucosamine sulfate on hip  
14 580 osteoarthritis: A randomized trial. *Ann Intern Med*. 2008. doi:10.7326/0003-4819-148-4-  
15 581 200802190-00005  
16  
17  
18 582 27. Oudelaar BW, Peerbooms JC, Huis in 't Veld R, Vochteloo AJH. Concentrations of Blood  
19 583 Components in Commercial Platelet-Rich Plasma Separation Systems: A Review of the  
20 584 Literature. *Am J Sports Med*. 2018. doi:10.1177/0363546517746112  
21  
22

23 585  
24  
25  
26  
27  
28  
29  
30  
31  
32  
33  
34  
35  
36  
37  
38  
39  
40  
41  
42  
43  
44  
45  
46  
47  
48  
49  
50  
51  
52  
53  
54  
55  
56  
57  
58  
59  
60



Fig.1 illustrating the PRIMA multicentre randomized controlled trial design and follow-up procedure

39x67mm (300 x 300 DPI)



# Surveys of PRIMA trial - version 83.01

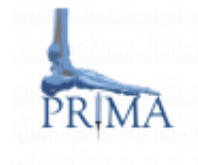

Printed on 16-09-2019 11:34:13 by Liam Paget

## Survey 'Vragenlijst PRIMA studie'

### Vragenlijst PRIMA studie - AOFAS - Pijn

| Number | Question                             | Answers                                                                                                                                                                                                         |
|--------|--------------------------------------|-----------------------------------------------------------------------------------------------------------------------------------------------------------------------------------------------------------------|
| 1.1    | Hoeveel pijn ervaart u aan uw voet?? | <input type="checkbox"/> Geen<br><input type="checkbox"/> Milde pijnklachten of af en toe pijn<br><input type="checkbox"/> Matige pijnklachten, dagelijks<br><input type="checkbox"/> Vrijwel continu erge pijn |

### Vragenlijst PRIMA studie - AOFAS resterende gedeelte

| Number | Question                                              | Answers                                                                                                                                                                                                                                                                                                                                                                                                                                              |
|--------|-------------------------------------------------------|------------------------------------------------------------------------------------------------------------------------------------------------------------------------------------------------------------------------------------------------------------------------------------------------------------------------------------------------------------------------------------------------------------------------------------------------------|
| 2.1    | Hoeveel beperkingen in het dagelijks leven ervaart u? | <input type="radio"/> Geen beperkingen, geen hulpmiddelen nodig<br><input type="radio"/> Geen beperkingen in algemeen dagelijkse bezigheden, wel beperkingen in recreatieve activiteiten (sport, hobbies, etc) geen ondersteuning<br><input type="radio"/> Beperkingen bij dagelijkse- en recreatieve activiteiten, stok<br><input type="radio"/> Ernstige beperkingen bij dagelijkse- en recreatieve activiteiten, walker, krukken, rolstoel, brace |
| 2.2    | Wat is de afstand die u in één keer kunt lopen?       | <input type="radio"/> Meer dan 600 meter<br><input type="radio"/> 400 - 600 meter<br><input type="radio"/> 100 - 300 meter<br><input type="radio"/> Minder dan 100 meter                                                                                                                                                                                                                                                                             |
| 2.3    | Heeft u moeite met lopen op een bepaalde ondergrond?  | <input type="radio"/> Geen problemen bij lopen<br><input type="radio"/> Enig problemen op ongelijke ondergrond, trap, helling, ladders<br><input type="radio"/> Ernstige problemen bij ongelijke ondergrond, trap, helling, ladders                                                                                                                                                                                                                  |

- 1  
2  
3  
4  
5  
6  
7  
8  
9  
10  
11  
12  
13  
14  
15  
16  
17  
18  
19  
20  
21  
22  
23  
24  
25  
26  
27  
28  
29  
30  
31  
32  
33  
34  
35  
36  
37  
38  
39  
40  
41  
42  
43  
44
- 2.4 Hoe zou u uw looppatroon beoordelen?  Normaal of minimaal afwijkend  
 Duidelijk  
 Ernstig
- 2.5 Hoe zou u de beweeglijkheid van uw voet beoordelen ten opzichte van de andere zijde of ten opzichte van vóór het ongeval?  Hetzelfde of licht beperkt t.o.v. de niet aangedane zijde of zoals voor het ongeval  
 Ongeveer de helft beperkt  
 Sterk verminderd, bijna geen bewegingen mogelijk
- 2.6 Hoe zou u de beweeglijkheid van uw enkel beoordelen ten opzichte van de andere zijde of ten opzichte van voor het ongeval?  Hetzelfde of licht beperkt t.o.v. de niet aangedane zijde of zoals voor het ongeval  
 Ongeveer de helft beperkt  
 Sterk verminderd, bijna geen bewegingen mogelijk
- 2.7 Hoe zou u de stabiliteit van uw voet en enkel beoordelen  Stabiel, ik verzwik mijn enkel hooguit incidenteel  
 Niet stabiel, ik verzwik mijn enkel vaak
- 2.8 Hoe zou u de stand van uw voet beoordelen ten opzichte van de andere zijde of ten opzichte van voor het ongeval?  Goed, ik kan mijn voet goed plat op de grond zetten, waarbij de stand niet afwijkend is  
 Ik sta vrijwel alleen op de buitenzijde van mijn voet  
 Ik kan mijn voet niet plat op de grond zetten en loop vrijwel alleen op mijn voorvoet

## Vragenlijst PRIMA studie - VAS Pain score

| Number | Question                                                                                                                                                             | Answers             |
|--------|----------------------------------------------------------------------------------------------------------------------------------------------------------------------|---------------------|
| 3.1    | VAS pijnscore (Geef uw minimaal pijnscore aan tijdens dagelijkse activiteiten op een schaal van 0 tot 100, waarbij 0 geen pijn is en 100 de ergste pijn denkbaar is) | (0.00) 100 (100.00) |

## Vragenlijst PRIMA studie - AAS

1  
2  
3  
4  
5  
6  
7  
8  
9  
10  
11  
12  
13  
14  
15  
16  
17  
18  
19  
20  
21  
22  
23  
24  
25  
26  
27  
28  
29  
30  
31  
32  
33  
34  
35  
36  
37  
38  
39  
40  
41  
42  
43  
44  
45  
46  
47  
48  
49  
50  
51  
52  
53  
54  
55  
56  
57  
58  
59  
60

| Number | Question | Answers |
|--------|----------|---------|
|--------|----------|---------|

---

- 1  
2  
3  
4  
5  
6  
7  
8  
9  
10  
11  
12  
13  
14  
15  
16  
17  
18  
19  
20  
21  
22  
23  
24  
25  
26  
27  
28  
29  
30  
31  
32  
33  
34  
35  
36  
37  
38  
39  
40  
41  
42  
43  
44  
45  
46  
47  
48  
49  
50  
51  
52  
53  
54  
55  
56  
57  
58  
59  
60
- 4.1 Wat is het meest bij u van toepassing ten aanzien van uw acitiviteit?
- American Football
  - Basketbal
  - Gymnastiek/turnen
  - Handbal
  - Rugby
  - Voetbal
  - Hockey
  - Korfbal
  - Gevechtssporten: judo, karate, kung fu, taekwando, jiu jitsu, etc.
  - Oriëntatiewandelen
  - Rhythmische gymnastiek
  - Volleybal
  - Boxen
  - Freestyle snowboarden
  - IJshockey
  - Tennis
  - Worstelen
  - Fitness, aerobics
  - Badminton
  - Baseball
  - Cross-country hardlopen
  - Moderne pentathlon
  - Squash
  - Surfen, windsurfen
  - Tafel tennis
  - Atletiek: spring-, werponderdelen
  - Waterskiën
  - Dans
  - Schermen
  - Zaalhockey
  - Bergbeklimmen
  - Langlauf
  - Parachute springen
  - Softball
  - Speciale beroepen en werkactiviteiten; speciale beroepen: ballet, professioneel soldaat, speciale reddingswerker, stuntman, etc.
  - Duiken
  - Scubaduiken
  - Skaten, in-line skaten
  - Atletiek: looponderdelen
  - Triatlon
  - Gewichtsheffen, body-building

- Alle competitieve sporten hieronder met 'seasonal' conditioning
- Zwaar fysiek werk
- Alpine skiën en snowboarden
- Bowlen/curlen
- Golf
- Mountainbike/BMX
- Powerliften
- Zeilen
- Fysiek werk
- Wielrennen
- Paardrijden
- Motorsporten/technische sporten
- Roeien, kayakken
- Boogschieten
- Water polo en zwemmen
- Kunnen lopen op oneven grond
- Geen sport, echter geen limitatie in dagelijkse activiteiten
- Kunnen lopen op even grond, maar de dagelijkse activiteiten zijn gelimiteerd
- Niet kunnen lopen, fysieke handicap wegens enkelproblemen

- 
- 4.1.1 ***If 'Wat is het meest bij u van toepassing ten aanzien van uw activiteit?' is equal to 'American Football' answer this question:***  
American Football
- Professioneel
- Competitief
- Recreatief
- 
- 4.1.2 ***If 'Wat is het meest bij u van toepassing ten aanzien van uw activiteit?' is equal to 'Basketbal' answer this question:***  
Basketbal
- Professioneel
- Competitief
- Recreatief
- 
- 4.1.3 ***If 'Wat is het meest bij u van toepassing ten aanzien van uw activiteit?' is equal to 'Gymnastiek/turnen' answer this question:***  
Gymnastiek/turnen
- Professioneel
- Competitief
- Recreatief
- 
- 4.1.4 ***If 'Wat is het meest bij u van toepassing ten aanzien van uw activiteit?' is equal to 'Handbal' answer this question:***  
Handbal
- Professioneel
- Competitief
- Recreatief
- 
- 4.1.5 ***If 'Wat is het meest bij u van toepassing ten aanzien van uw activiteit?' is equal to 'Rugby' answer this question:***  
Rugby
- Professioneel
- Competitief
- Recreatief

|    |        |                                                                                                                                                                                          |                                     |
|----|--------|------------------------------------------------------------------------------------------------------------------------------------------------------------------------------------------|-------------------------------------|
| 1  |        |                                                                                                                                                                                          |                                     |
| 2  | 4.1.6  | <b>If 'Wat is het meest bij u van toepassing ten aanzien van uw acitiviteit?' is equal to 'Voetbal' answer this question:</b>                                                            | <input type="radio"/> Professioneel |
| 3  |        |                                                                                                                                                                                          | <input type="radio"/> Competitief   |
| 4  |        |                                                                                                                                                                                          | <input type="radio"/> Recreatief    |
| 5  |        | Voetbal                                                                                                                                                                                  |                                     |
| 6  |        |                                                                                                                                                                                          |                                     |
| 7  |        |                                                                                                                                                                                          |                                     |
| 8  | 4.1.7  | <b>If 'Wat is het meest bij u van toepassing ten aanzien van uw acitiviteit?' is equal to 'Hockey' answer this question:</b>                                                             | <input type="radio"/> Professioneel |
| 9  |        |                                                                                                                                                                                          | <input type="radio"/> Competitief   |
| 10 |        |                                                                                                                                                                                          | <input type="radio"/> Recreatief    |
| 11 |        | Hockey                                                                                                                                                                                   |                                     |
| 12 |        |                                                                                                                                                                                          |                                     |
| 13 |        |                                                                                                                                                                                          |                                     |
| 14 | 4.1.8  | <b>If 'Wat is het meest bij u van toepassing ten aanzien van uw acitiviteit?' is equal to 'Korfbal' answer this question:</b>                                                            | <input type="radio"/> Professioneel |
| 15 |        |                                                                                                                                                                                          | <input type="radio"/> Competitief   |
| 16 |        |                                                                                                                                                                                          | <input type="radio"/> Recreatief    |
| 17 |        | Korfbal                                                                                                                                                                                  |                                     |
| 18 |        |                                                                                                                                                                                          |                                     |
| 19 |        |                                                                                                                                                                                          |                                     |
| 20 | 4.1.9  | <b>If 'Wat is het meest bij u van toepassing ten aanzien van uw acitiviteit?' is equal to 'Gevechtssporten: judo, karate, kung fu, taekwando, jiu jitsu, etc.' answer this question:</b> | <input type="radio"/> Professioneel |
| 21 |        |                                                                                                                                                                                          | <input type="radio"/> Competitief   |
| 22 |        |                                                                                                                                                                                          | <input type="radio"/> Recreatief    |
| 23 |        | Gevechtssporten: judo, karate, kung fu, taekwando, jiu                                                                                                                                   |                                     |
| 24 |        | jitsu, etc.                                                                                                                                                                              |                                     |
| 25 |        |                                                                                                                                                                                          |                                     |
| 26 |        |                                                                                                                                                                                          |                                     |
| 27 | 4.1.10 | <b>If 'Wat is het meest bij u van toepassing ten aanzien van uw acitiviteit?' is equal to 'Oriëntatielopen' answer this question:</b>                                                    | <input type="radio"/> Professioneel |
| 28 |        |                                                                                                                                                                                          | <input type="radio"/> Competitief   |
| 29 |        |                                                                                                                                                                                          | <input type="radio"/> Recreatief    |
| 30 |        | Oriëntatielopen                                                                                                                                                                          |                                     |
| 31 |        |                                                                                                                                                                                          |                                     |
| 32 |        |                                                                                                                                                                                          |                                     |
| 33 | 4.1.11 | <b>If 'Wat is het meest bij u van toepassing ten aanzien van uw acitiviteit?' is equal to 'Rhythmische gymnastiek' answer this question:</b>                                             | <input type="radio"/> Professioneel |
| 34 |        |                                                                                                                                                                                          | <input type="radio"/> Competitief   |
| 35 |        |                                                                                                                                                                                          | <input type="radio"/> Recreatief    |
| 36 |        | Rhythmisch gymnastiek                                                                                                                                                                    |                                     |
| 37 |        |                                                                                                                                                                                          |                                     |
| 38 |        |                                                                                                                                                                                          |                                     |
| 39 | 4.1.12 | <b>If 'Wat is het meest bij u van toepassing ten aanzien van uw acitiviteit?' is equal to 'Volleybal' answer this question:</b>                                                          | <input type="radio"/> Professioneel |
| 40 |        |                                                                                                                                                                                          | <input type="radio"/> Competitief   |
| 41 |        |                                                                                                                                                                                          | <input type="radio"/> Recreatief    |
| 42 |        | Volleybal                                                                                                                                                                                |                                     |
| 43 |        |                                                                                                                                                                                          |                                     |
| 44 | 4.1.13 | <b>If 'Wat is het meest bij u van toepassing ten aanzien van uw acitiviteit?' is equal to 'Boxen' answer this question:</b>                                                              | <input type="radio"/> Professioneel |
| 45 |        |                                                                                                                                                                                          | <input type="radio"/> Competitief   |
| 46 |        |                                                                                                                                                                                          | <input type="radio"/> Recreatief    |
| 47 |        | Boxen                                                                                                                                                                                    |                                     |
| 48 |        |                                                                                                                                                                                          |                                     |
| 49 |        |                                                                                                                                                                                          |                                     |
| 50 | 4.1.14 | <b>If 'Wat is het meest bij u van toepassing ten aanzien van uw acitiviteit?' is equal to 'Freestyle snowboarden' answer this question:</b>                                              | <input type="radio"/> Professioneel |
| 51 |        |                                                                                                                                                                                          | <input type="radio"/> Competitief   |
| 52 |        |                                                                                                                                                                                          | <input type="radio"/> Recreatief    |
| 53 |        | Freestyle snowboarden                                                                                                                                                                    |                                     |
| 54 |        |                                                                                                                                                                                          |                                     |
| 55 |        |                                                                                                                                                                                          |                                     |
| 56 | 4.1.15 | <b>If 'Wat is het meest bij u van toepassing ten aanzien van uw acitiviteit?' is equal to 'Freestyle snowboarden' answer this question:</b>                                              | <input type="radio"/> Professioneel |
| 57 |        |                                                                                                                                                                                          | <input type="radio"/> Competitief   |
| 58 |        |                                                                                                                                                                                          | <input type="radio"/> Recreatief    |
| 59 |        | IJshockey                                                                                                                                                                                |                                     |
| 60 |        |                                                                                                                                                                                          |                                     |

- 1  
2  
3  
4  
5  
6  
7
- 4.1.16 ***If 'Wat is het meest bij u van toepassing ten aanzien van uw acitiviteit?' is equal to 'Tennis' answer this question:***  
Tennis  Professioneel  
 Competitief  
 Recreatief
- 8  
9  
10  
11  
12
- 4.1.17 ***If 'Wat is het meest bij u van toepassing ten aanzien van uw acitiviteit?' is equal to 'Worstelen' answer this question:***  
Worstelen  Professioneel  
 Competitief  
 Recreatief
- 13  
14  
15  
16  
17  
18
- 4.1.18 ***If 'Wat is het meest bij u van toepassing ten aanzien van uw acitiviteit?' is equal to 'Fitness, aerobics' answer this question:***  
Fitness, aerobics  Professioneel  
 Competitief  
 Recreatief
- 19  
20  
21  
22  
23  
24
- 4.1.19 ***If 'Wat is het meest bij u van toepassing ten aanzien van uw acitiviteit?' is equal to 'Badminton' answer this question:***  
Badminton  Professioneel  
 Competitief  
 Recreatief
- 25  
26  
27  
28  
29  
30
- 4.1.20 ***If 'Wat is het meest bij u van toepassing ten aanzien van uw acitiviteit?' is equal to 'Baseball' answer this question:***  
Baseball  Professioneel  
 Competitief  
 Recreatief
- 31  
32  
33  
34  
35
- 4.1.21 ***If 'Wat is het meest bij u van toepassing ten aanzien van uw acitiviteit?' is equal to 'Cross-country hardlopen' answer this question:***  
Cross-country hardlopen  Professioneel  
 Competitief  
 Recreatief
- 36  
37  
38  
39  
40  
41
- 4.1.22 ***If 'Wat is het meest bij u van toepassing ten aanzien van uw acitiviteit?' is equal to 'Moderne pentathlon' answer this question:***  
Moderne pentathlon  Professioneel  
 Competitief  
 Recreatief
- 42  
43  
44  
45  
46  
47
- 4.1.23 ***If 'Wat is het meest bij u van toepassing ten aanzien van uw acitiviteit?' is equal to 'Squash' answer this question:***  
Squash  Professioneel  
 Competitief  
 Recreatief
- 48  
49  
50  
51  
52  
53
- 4.1.24 ***If 'Wat is het meest bij u van toepassing ten aanzien van uw acitiviteit?' is equal to 'Surfen, windsurfen' answer this question:***  
Surfen, windsurfen  Professioneel  
 Competitief  
 Recreatief
- 54  
55  
56  
57  
58  
59  
60
- 4.1.25 ***If 'Wat is het meest bij u van toepassing ten aanzien van uw acitiviteit?' is equal to 'Tafel tennis' answer this question:***  
Tafel tennis  Professioneel  
 Competitief  
 Recreatief

- 1  
2  
3  
4  
5  
6  
7
- 
- 4.1.26 **If 'Wat is het meest bij u van toepassing ten aanzien van uw acitiviteit?' is equal to 'Atletiek: spring-, werponderdelen' answer this question:**  
Atletiek: spring-, werponderdelen
- Professioneel  
 Competitief  
 Recreatief
- 
- 8  
9  
10  
11  
12
- 4.1.27 **If 'Wat is het meest bij u van toepassing ten aanzien van uw acitiviteit?' is equal to 'Waterskieën' answer this question:**  
Waterskien
- Professioneel  
 Competitief  
 Recreatief
- 
- 13  
14  
15  
16  
17  
18
- 4.1.28 **If 'Wat is het meest bij u van toepassing ten aanzien van uw acitiviteit?' is equal to 'Dans' answer this question:**  
Dans
- Professioneel  
 Competitief  
 Recreatief
- 
- 19  
20  
21  
22  
23  
24
- 4.1.29 **If 'Wat is het meest bij u van toepassing ten aanzien van uw acitiviteit?' is equal to 'Schermen' answer this question:**  
Schermen
- Professioneel  
 Competitief  
 Recreatief
- 
- 25  
26  
27  
28  
29  
30
- 4.1.30 **If 'Wat is het meest bij u van toepassing ten aanzien van uw acitiviteit?' is equal to 'Zaalhockey' answer this question:**  
Zaalhockey
- Professioneel  
 Competitief  
 Recreatief
- 
- 31  
32  
33  
34  
35
- 4.1.31 **If 'Wat is het meest bij u van toepassing ten aanzien van uw acitiviteit?' is equal to 'Bergbeklimmen' answer this question:**  
Bergbeklimmen
- Professioneel  
 Competitief  
 Recreatief
- 
- 36  
37  
38  
39  
40  
41
- 4.1.32 **If 'Wat is het meest bij u van toepassing ten aanzien van uw acitiviteit?' is equal to 'Langlauf' answer this question:**  
Langlauf
- Professioneel  
 Competitief  
 Recreatief
- 
- 42  
43  
44  
45  
46  
47
- 4.1.33 **If 'Wat is het meest bij u van toepassing ten aanzien van uw acitiviteit?' is equal to 'Parachute springen' answer this question:**  
Parachute springen
- Professioneel  
 Competitief  
 Recreatief
- 
- 48  
49  
50  
51  
52  
53  
54  
55  
56  
57  
58  
59  
60
- 4.1.34 **If 'Wat is het meest bij u van toepassing ten aanzien van uw acitiviteit?' is equal to 'Softball' answer this question:**  
Softball
- Professioneel  
 Competitief  
 Recreatief



- 1  
2  
3  
4  
5  
6  
7  
8  
9  
10  
11  
12
- 4.1.35 ***If 'Wat is het meest bij u van toepassing ten aanzien van uw activiteit?' is equal to 'Speciale beroepen en werkactiviteiten; speciale beroepen: ballet, professioneel soldaat, speciale reddingswerker, stuntman, etc.' answer this question:***  
Speciale beroepen en werkactiviteiten speciale beroepen: ballet, professioneel soldaat, speciale reddingswerker, stuntman, etc.
- ballet, professioneel soldaat, speciale reddingswerker, stuntman, etc.
- 
- 13  
14  
15  
16  
17
- 4.1.36 ***If 'Wat is het meest bij u van toepassing ten aanzien van uw activiteit?' is equal to 'Duiken' answer this question:***  
Duiken
- Professioneel/competitief  
 Recreatief
- 
- 18  
19  
20  
21  
22
- 4.1.37 ***If 'Wat is het meest bij u van toepassing ten aanzien van uw activiteit?' is equal to 'Scubaduiken' answer this question:***  
Scubaduiken
- Professioneel/competitief  
 Recreatief
- 
- 23  
24  
25  
26  
27  
28
- 4.1.38 ***If 'Wat is het meest bij u van toepassing ten aanzien van uw activiteit?' is equal to 'Skaten, in-line skaten' answer this question:***  
skaten, in-linen skaten
- Professioneel/competitief  
 Recreatief
- 
- 29  
30  
31  
32  
33
- 4.1.39 ***If 'Wat is het meest bij u van toepassing ten aanzien van uw activiteit?' is equal to 'Atletiek: looponderdelen' answer this question:***  
Atletiek: looponderdelen
- Professioneel/competitief  
 Recreatief
- 
- 34  
35  
36  
37  
38
- 4.1.40 ***If 'Wat is het meest bij u van toepassing ten aanzien van uw activiteit?' is equal to 'Triatlon' answer this question:***  
triatlon
- Professioneel/competitief  
 Recreatief
- 
- 39  
40  
41  
42  
43  
44  
45
- 4.1.41 ***If 'Wat is het meest bij u van toepassing ten aanzien van uw activiteit?' is equal to 'Gewichtsheffen, body-building' answer this question:***  
Gewichtsheffen, body-building
- Professioneel/competitief  
 Recreatief
- 
- 46  
47  
48  
49  
50  
51  
52
- 4.1.42 ***If 'Wat is het meest bij u van toepassing ten aanzien van uw activiteit?' is equal to 'Alle competitieve sporten hieronder met 'seasonal' conditioning' answer this question:***  
Alle competitieve sporten hieronder met 'seasonal' conditioning
- Alle competitieve sporten hieronder met 'seasonal' conditioning
- 
- 53  
54  
55  
56  
57  
58  
59  
60
- 4.1.43 ***If 'Wat is het meest bij u van toepassing ten aanzien van uw activiteit?' is equal to 'Zwaar fysiek werk' answer this question:***  
Zwaar fysiek werk
- Alle competitieve sporten hieronder met 'seasonal' conditioning

- 1  
2  
3  
4  
5  
6
- 
- 4.1.44 **If 'Wat is het meest bij u van toepassing ten aanzien van uw acitiviteit?' is equal to 'Alpine skiën en snowboarden' answer this question:**  
Alpine skien en snowboarden  Alpine skien en snowboarden
- 
- 7  
8  
9  
10  
11  
12
- 4.1.45 **If 'Wat is het meest bij u van toepassing ten aanzien van uw acitiviteit?' is equal to 'Bowlen/curlen' answer this question:**  
Bowlen/curlen  Bowlen/curlen
- 
- 13  
14  
15  
16  
17
- 4.1.46 **If 'Wat is het meest bij u van toepassing ten aanzien van uw acitiviteit?' is equal to 'Golf' answer this question:**  
Golf  Golf
- 
- 18  
19  
20  
21  
22
- 4.1.47 **If 'Wat is het meest bij u van toepassing ten aanzien van uw acitiviteit?' is equal to 'Mountainbike/BMX' answer this question:**  
Mountainbike/BMX  Mountainbike/BMX
- 
- 23  
24  
25  
26  
27  
28
- 4.1.48 **If 'Wat is het meest bij u van toepassing ten aanzien van uw acitiviteit?' is equal to 'Powerliften' answer this question:**  
Powerliften  Powerliften
- 
- 29  
30  
31  
32  
33
- 4.1.49 **If 'Wat is het meest bij u van toepassing ten aanzien van uw acitiviteit?' is equal to 'Zeilen' answer this question:**  
Zeilen  Zeilen
- 
- 34  
35  
36  
37  
38
- 4.1.50 **If 'Wat is het meest bij u van toepassing ten aanzien van uw acitiviteit?' is equal to 'Fysiek werk' answer this question:**  
Fysiek werk  Fysiek werk
- 
- 39  
40  
41  
42  
43  
44
- 4.1.51 **If 'Wat is het meest bij u van toepassing ten aanzien van uw acitiviteit?' is equal to 'Wielrennen' answer this question:**  
Wielrennen  Wielrennen
- 
- 45  
46  
47  
48  
49
- 4.1.52 **If 'Wat is het meest bij u van toepassing ten aanzien van uw acitiviteit?' is equal to 'Paardrijden' answer this question:**  
Paardrijden  Paardrijden
- 
- 50  
51  
52  
53  
54  
55
- 4.1.53 **If 'Wat is het meest bij u van toepassing ten aanzien van uw acitiviteit?' is equal to 'Motorsporten/technische sporten' answer this question:**  
Motorsporten/technische sporten  Motorsporten/technische sporten
- 
- 56  
57  
58  
59  
60
- 4.1.54 **If 'Wat is het meest bij u van toepassing ten aanzien van uw acitiviteit?' is equal to 'Roeien, kayakken' answer this question:**  
Roeien, kayakken  Roeien, kayakken

|        |                                                                                                                                                                                                                                                                                    |                                                                                                    |
|--------|------------------------------------------------------------------------------------------------------------------------------------------------------------------------------------------------------------------------------------------------------------------------------------|----------------------------------------------------------------------------------------------------|
| 4.1.55 | <b>If 'Wat is het meest bij u van toepassing ten aanzien van uw acitiviteit?' is equal to 'Boogschieten' answer this question:</b><br>Boogschieten                                                                                                                                 | <input type="radio"/> Boogschieten                                                                 |
| 4.1.56 | <b>If 'Wat is het meest bij u van toepassing ten aanzien van uw acitiviteit?' is equal to 'Water polo en zwemmen' answer this question:</b><br>Water polo en zwemmen                                                                                                               | <input type="radio"/> Water polo en zwemmen                                                        |
| 4.1.57 | <b>If 'Wat is het meest bij u van toepassing ten aanzien van uw acitiviteit?' is equal to 'Kunnen lopen op oneven grond' answer this question:</b><br>Kunnen lopen op oneven grond                                                                                                 | <input type="radio"/> Kunnen lopen op oneven grond                                                 |
| 4.1.58 | <b>If 'Wat is het meest bij u van toepassing ten aanzien van uw acitiviteit?' is equal to 'Geen sport, echter geen limitatie in dagelijkse activiteiten' answer this question:</b><br>Geen sport, echter geen limitatie in dagelijkse activiteiten                                 | <input type="radio"/> Geen sport, echter geen limitatie in dagelijkse activiteiten                 |
| 4.1.59 | <b>If 'Wat is het meest bij u van toepassing ten aanzien van uw acitiviteit?' is equal to 'Kunnen lopen op even grond, maar de dagelijkse activiteiten zijn gelimiteerd' answer this question:</b><br>Kunnen lopen op even grond, maar de dagelijkse activiteiten zijn gelimiteerd | <input type="radio"/> Kunnen lopen op even grond, maar de dagelijkse activiteiten zijn gelimiteerd |
| 4.1.60 | <b>If 'Wat is het meest bij u van toepassing ten aanzien van uw acitiviteit?' is equal to 'Niet kunnen lopen, fysieke handicap wegens enkelproblemen' answer this question:</b><br>Niet kunnen lopen, fysieke handicap wegens enkelproblemen                                       | <input type="radio"/> Niet kunnen lopen, fysieke handicap wegens enkelproblemen                    |

## Vragenlijst PRIMA studie - Hoe tevreden bent u over de enkelklachten?

| Number | Question                                   | Answers                                                                                                                       |
|--------|--------------------------------------------|-------------------------------------------------------------------------------------------------------------------------------|
| 5.1    | Hoe tevreden bent u over de enkelklachten? | <input type="radio"/> Slecht<br><input type="radio"/> Matig<br><input type="radio"/> Goed<br><input type="radio"/> Uitstekend |

## Vragenlijst PRIMA studie - SF-36

| Number | Question                                                                                                                                                                                                                                                                                                                                                           | Answers                                                                                                                                                                                                                                                                                      |
|--------|--------------------------------------------------------------------------------------------------------------------------------------------------------------------------------------------------------------------------------------------------------------------------------------------------------------------------------------------------------------------|----------------------------------------------------------------------------------------------------------------------------------------------------------------------------------------------------------------------------------------------------------------------------------------------|
|        | Deze vragenlijst gaat over uw standpunten t.a.v. uw gezondheid. Met behulp van deze gegevens kan worden bijgehouden hoe u zich voelt en hoe goed u in staat bent uw gebruikelijke bezigheden uit te voeren. Beantwoord elke vraag door een antwoord aan te klikken. Als u niet zeker weet hoe u een vraag moet beantwoorden, geef dan het best mogelijke antwoord. |                                                                                                                                                                                                                                                                                              |
| 6.1    | Hoe zou u over het algemeen uw gezondheid noemen?                                                                                                                                                                                                                                                                                                                  | <input type="radio"/> Uitstekend <input type="radio"/> Zeer goed <input type="radio"/> Goed <input type="radio"/> Matig <input type="radio"/> Slecht                                                                                                                                         |
| 6.2    | Hoe beoordeelt u nu uw gezondheid over het algemeen vergeleken met een jaar geleden?                                                                                                                                                                                                                                                                               | <input type="radio"/> Veel beter dan een jaar geleden <input type="radio"/> Wat beter dan een jaar geleden <input type="radio"/> Ongeveer hetzelfde als een jaar geleden<br><input type="radio"/> Wat slechter dan een jaar geleden <input type="radio"/> Veel slechter dan een jaar geleden |
| 6.3    | Wordt u door uw gezondheid op dit moment beperkt bij forse inspanning, zoals hardlopen, tillen van zware voorwerpen of een veeleisende sport beoefenen?                                                                                                                                                                                                            | <input type="radio"/> Ja, ernstig beperkt <input type="radio"/> Ja, een beetje beperkt <input type="radio"/> Nee, helemaal niet beperkt                                                                                                                                                      |
| 6.4    | Wordt u door uw gezondheid op dit moment beperkt bij matige inspanning zoals een tafel verplaatsen, stofzuigen, zwemmen of fietsen?                                                                                                                                                                                                                                | <input type="radio"/> Ja, ernstig beperkt <input type="radio"/> Ja, een beetje beperkt <input type="radio"/> Nee, helemaal niet beperkt                                                                                                                                                      |
| 6.5    | Wordt u door uw gezondheid op dit moment beperkt bij boodschappen tillen of dragen?                                                                                                                                                                                                                                                                                | <input type="radio"/> Ja, ernstig beperkt <input type="radio"/> Ja, een beetje beperkt <input type="radio"/> Nee, helemaal niet beperkt                                                                                                                                                      |
| 6.6    | Wordt u door uw gezondheid op dit moment beperkt bij een paar trappen oplopen?                                                                                                                                                                                                                                                                                     | <input type="radio"/> Ja, ernstig beperkt <input type="radio"/> Ja, een beetje beperkt <input type="radio"/> Nee, helemaal niet beperkt                                                                                                                                                      |
| 6.7    | Wordt u door uw gezondheid op dit moment beperkt bij één trap oplopen?                                                                                                                                                                                                                                                                                             | <input type="radio"/> Ja, ernstig beperkt <input type="radio"/> Ja, een beetje beperkt <input type="radio"/> Nee, helemaal niet beperkt                                                                                                                                                      |
| 6.8    | Wordt u door uw gezondheid op dit moment beperkt bij bukken, knielen of hurken?                                                                                                                                                                                                                                                                                    | <input type="radio"/> Ja, ernstig beperkt <input type="radio"/> Ja, een beetje beperkt <input type="radio"/> Nee, helemaal niet beperkt                                                                                                                                                      |
| 6.9    | Wordt u door uw gezondheid op dit moment beperkt bij meer dan één kilometer lopen?                                                                                                                                                                                                                                                                                 | <input type="radio"/> Ja, ernstig beperkt <input type="radio"/> Ja, een beetje beperkt <input type="radio"/> Nee, helemaal niet beperkt                                                                                                                                                      |
| 6.10   | Wordt u door uw gezondheid op dit moment beperkt bij een paar honderd meter lopen?                                                                                                                                                                                                                                                                                 | <input type="radio"/> Ja, ernstig beperkt <input type="radio"/> Ja, een beetje beperkt <input type="radio"/> Nee, helemaal niet beperkt                                                                                                                                                      |

- 1  
2  
3  
4  
5  
6  
7  
8  
9  
10  
11  
12  
13  
14  
15  
16  
17  
18  
19  
20  
21  
22  
23  
24  
25  
26  
27  
28  
29  
30  
31  
32  
33  
34  
35  
36  
37  
38  
39  
40  
41  
42  
43  
44  
45  
46  
47  
48  
49  
50  
51  
52  
53  
54  
55  
56  
57  
58  
59  
60
- 
- 6.11 Wordt u door uw gezondheid op dit moment beperkt bij ongeveer honderd meter lopen?  Ja, ernstig beperkt  Ja, een beetje beperkt  Nee, helemaal niet beperkt
- 
- 6.12 Wordt u door uw gezondheid op dit moment beperkt bij uzelf wassen of aankleden?  Ja, ernstig beperkt  Ja, een beetje beperkt  Nee, helemaal niet beperkt
- 
- 6.13 U besteedde in de afgelopen 4 weken minder tijd aan werk of andere bezigheden  Ja  Nee
- 
- 6.14 U heeft in de afgelopen 4 weken minder bereikt dan u zou willen  Ja  Nee
- 
- 6.15 U was in de afgelopen 4 weken beperkt in het soort werk of andere bezigheden.  Ja  Nee
- 
- 6.16 U had de afgelopen 4 weken moeite om uw werk of andere bezigheden uit te voeren (het kostte u bijvoorbeeld extra inspanning).  Ja  Nee
- 
- 6.17 U besteedde in de afgelopen 4 weken minder tijd aan werk of andere bezigheden ten gevolge van emotionele problemen  Ja  Nee
- 
- 6.18 U heeft in de afgelopen 4 weken minder bereikt dan u zou willen ten gevolge van emotionele problemen.  Ja  Nee
- 
- 6.19 U deed de afgelopen 4 weken uw werk of andere bezigheden niet zo zorgvuldig als gewoonlijk ten gevolge van emotionele problemen.  Ja  Nee
- 
- 6.20 In hoeverre hebben uw lichamelijke gezondheid of emotionele problemen u gedurende de afgelopen 4 weken gehinderd in uw normale omgang met familie, vrienden of burens, of bij activiteiten in groepsverband?  Helemaal niet  Enigszins  Nogal  Veel  Heel erg veel
- 
- 6.21 Hoeveel lichamelijke pijn heeft u de afgelopen 4 weken gehad?  Geen  Heel licht  Licht  Nogal  Ernstig  Heel ernstig
- 
- 6.22 In welke mate bent u de afgelopen 4 weken door de pijn gehinderd in uw normale werk (zowel werk buitenshuis als huishoudelijk werk)?  Helemaal niet  Een klein beetje  Nogal  Veel  Heel erg veel

1  
2 6.23 Voelde u zich levenslustig?  Altijd  
3  Meestal  
4  Vaak  
5  Soms  
6  Zelden  
7  Nooit  
8  
9  
10

---

11 6.24 Was u erg zenuwachtig?  Altijd  
12  Meestal  
13  Vaak  
14  Soms  
15  Zelden  
16  Nooit  
17  
18  
19  
20

---

21 6.25 Zat u zo in de put dat u niets kon?  Altijd  
22  Meestal  
23  Vaak  
24  Soms  
25  Zelden  
26  Nooit  
27  
28  
29  
30

---

31 6.26 Voelde u zich rustig en tevreden?  Altijd  
32  Meestal  
33  Vaak  
34  Soms  
35  Zelden  
36  Nooit  
37  
38  
39  
40

---

41 6.27 Had u veel energie?  Altijd  
42  Meestal  
43  Vaak  
44  Soms  
45  Zelden  
46  Nooit  
47  
48  
49  
50

---

51 6.28 Voelde u zich somber en neerslachtig?  Altijd  
52  Meestal  
53  Vaak  
54  Soms  
55  Zelden  
56  Nooit  
57  
58  
59  
60

1  
2  
3  
4  
5  
6  
7  
8  
9  
10  
11  
12  
13  
14  
15  
16  
17  
18  
19  
20  
21  
22  
23  
24  
25  
26  
27  
28  
29  
30  
31  
32  
33  
34  
35  
36  
37  
38  
39  
40  
41  
42  
43  
44  
45  
46  
47  
48  
49  
50  
51  
52  
53  
54  
55  
56  
57  
58  
59  
60

---

|      |                         |                                                                                                                                                                                          |
|------|-------------------------|------------------------------------------------------------------------------------------------------------------------------------------------------------------------------------------|
| 6.29 | Voelde u zich uitgeput? | <input type="radio"/> Altijd<br><input type="radio"/> Meestal<br><input type="radio"/> Vaak<br><input type="radio"/> Soms<br><input type="radio"/> Zelden<br><input type="radio"/> Nooit |
|------|-------------------------|------------------------------------------------------------------------------------------------------------------------------------------------------------------------------------------|

---

|      |                          |                                                                                                                                                                                          |
|------|--------------------------|------------------------------------------------------------------------------------------------------------------------------------------------------------------------------------------|
| 6.30 | Was u een gelukkig mens? | <input type="radio"/> Altijd<br><input type="radio"/> Meestal<br><input type="radio"/> Vaak<br><input type="radio"/> Soms<br><input type="radio"/> Zelden<br><input type="radio"/> Nooit |
|------|--------------------------|------------------------------------------------------------------------------------------------------------------------------------------------------------------------------------------|

---

|      |                    |                                                                                                                                                                                          |
|------|--------------------|------------------------------------------------------------------------------------------------------------------------------------------------------------------------------------------|
| 6.31 | Voelde u zich moe? | <input type="radio"/> Altijd<br><input type="radio"/> Meestal<br><input type="radio"/> Vaak<br><input type="radio"/> Soms<br><input type="radio"/> Zelden<br><input type="radio"/> Nooit |
|------|--------------------|------------------------------------------------------------------------------------------------------------------------------------------------------------------------------------------|

---

|      |                                                                                                                                                                                      |                                                                                                                                                            |
|------|--------------------------------------------------------------------------------------------------------------------------------------------------------------------------------------|------------------------------------------------------------------------------------------------------------------------------------------------------------|
| 6.32 | Hoe vaak hebben uw lichamelijke gezondheid of emotionele problemen u gedurende de afgelopen 4 weken gehinderd bij uw sociale activiteiten (zoals vrienden of familie bezoeken etc.)? | <input type="radio"/> Altijd<br><input type="radio"/> Meestal<br><input type="radio"/> Soms<br><input type="radio"/> Zelden<br><input type="radio"/> Nooit |
|------|--------------------------------------------------------------------------------------------------------------------------------------------------------------------------------------|------------------------------------------------------------------------------------------------------------------------------------------------------------|

---

|      |                                                            |                                                                                                                                                                                                              |
|------|------------------------------------------------------------|--------------------------------------------------------------------------------------------------------------------------------------------------------------------------------------------------------------|
| 6.33 | Ik lijk wat gemakkelijker ziek te worden dan andere mensen | <input type="radio"/> Volkomen juist<br><input type="radio"/> Grotendeels juist<br><input type="radio"/> Weet ik niet<br><input type="radio"/> Grotendeels onjuist<br><input type="radio"/> Volkomen onjuist |
|------|------------------------------------------------------------|--------------------------------------------------------------------------------------------------------------------------------------------------------------------------------------------------------------|

---

|      |                                                 |                                                                                                                                                                                                              |
|------|-------------------------------------------------|--------------------------------------------------------------------------------------------------------------------------------------------------------------------------------------------------------------|
| 6.34 | Ik ben even gezond als andere mensen die ik ken | <input type="radio"/> Volkomen juist<br><input type="radio"/> Grotendeels juist<br><input type="radio"/> Weet ik niet<br><input type="radio"/> Grotendeels onjuist<br><input type="radio"/> Volkomen onjuist |
|------|-------------------------------------------------|--------------------------------------------------------------------------------------------------------------------------------------------------------------------------------------------------------------|

1  
2  
3  
4  
5  
6  
7  
8  
9

---

6.35 Ik verwacht dat mijn gezondheid achteruit zal gaan

Volkomen juist

Grotendeels juist

Weet ik niet

Grotendeels onjuist

Volkomen onjuist

---

10  
11  
12  
13  
14  
15  
16  
17  
18  
19  
20  
21  
22

6.36 Mijn gezondheid is uitstekend

Volkomen juist

Grotendeels juist

Weet ik niet

Grotendeels onjuist

Volkomen onjuist

---

## Vragenlijst PRIMA studie - EQ-5D-3L

23  
24  
25  
26

| Number | Question | Answers |
|--------|----------|---------|
|--------|----------|---------|

27  
28  
29  
30  
31  
32

Deze vragenlijst gaat over uw standpunten t.a.v. uw gezondheid. Met behulp van deze gegevens kan worden bijgehouden hoe u zich voelt en hoe goed u in staat bent uw gebruikelijke bezigheden uit te voeren. Beantwoord elke vraag door een antwoord aan te klikken. Als u niet zeker weet hoe u een vraag moet beantwoorden, geef dan het best mogelijke antwoord.

---

33  
34  
35  
36  
37  
38

7.1 Hoe is het met uw Mobiliteit gesteld?

Ik heb geen problemen met lopen

Ik heb enige problemen met lopen

Ik ben bedlegerig

---

39  
40  
41  
42  
43  
44  
45  
46  
47

7.2 Hoe is het met uw Zelfzorg gesteld?

Ik heb geen problemen om mijzelf te wassen of aan te kleden

Ik heb enige problemen om mijzelf te wassen of aan te kleden

Ik ben niet in staat om mijzelf te wassen of aan te kleden

---

48  
49  
50  
51  
52  
53  
54  
55  
56  
57  
58  
59  
60

7.3 Hoe is het met de Dagelijkse activiteiten (werk, studie, huishouden, gezins- en vrijetijdsactiviteiten) gesteld?

Ik heb geen problemen met mijn dagelijkse activiteiten

Ik heb enige problemen met mijn dagelijkse activiteiten

Ik ben niet in staat om mijn dagelijkse activiteiten uit te voeren



1  
2  
3  
4  
5  
6  
7

|     |                                          |                                                                                                                                                                                                |
|-----|------------------------------------------|------------------------------------------------------------------------------------------------------------------------------------------------------------------------------------------------|
| 7.4 | Hoe is het met de Pijn/klachten gesteld? | <input type="radio"/> Ik heb geen pijn of andere klachten<br><input type="radio"/> Ik heb matige pijn of andere klachten<br><input type="radio"/> Ik heb zeer ernstige pijn of andere klachten |
|-----|------------------------------------------|------------------------------------------------------------------------------------------------------------------------------------------------------------------------------------------------|

8  
9  
10  
11  
12  
13

|     |                                     |                                                                                                                                                                   |
|-----|-------------------------------------|-------------------------------------------------------------------------------------------------------------------------------------------------------------------|
| 7.5 | Hoe is het met de Stemming gesteld? | <input type="radio"/> Ik ben niet angstig of somber<br><input type="radio"/> Ik ben matig angstig of somber<br><input type="radio"/> Ik ben erg angstig of somber |
|-----|-------------------------------------|-------------------------------------------------------------------------------------------------------------------------------------------------------------------|

14  
15  
16  
17  
18

We willen weten hoe goed of slecht uw gezondheid VANDAAG is. Deze meetschaal loopt van 0 tot 100: 100 staat voor de BESTE gezondheid die u zich kunt voorstellen - 0 staat voor de SLECHTSTE gezondheid die u zich kunt voorstellen

19  
20  
21  
22  
23  
24

|     |                       |        |          |
|-----|-----------------------|--------|----------|
| 7.6 | Uw Gezondheid vandaag | (0.00) | (100.00) |
|-----|-----------------------|--------|----------|

## Vragenlijst PRIMA studie - AOS

25  
26  
27  
28  
29  
30  
31  
32  
33  
34  
35  
36  
37  
38  
39  
40  
41  
42  
43  
44  
45  
46  
47  
48  
49  
50  
51  
52  
53  
54  
55  
56  
57  
58  
59  
60

| Number                                                                                                                                                                                                                                                                                                                                                                                                        | Question                                                                                                                                                     | Answers                                                                                            |          |
|---------------------------------------------------------------------------------------------------------------------------------------------------------------------------------------------------------------------------------------------------------------------------------------------------------------------------------------------------------------------------------------------------------------|--------------------------------------------------------------------------------------------------------------------------------------------------------------|----------------------------------------------------------------------------------------------------|----------|
| Instructies: De lijn naast elke vraag staat voor hoeveel PIJN u heeft in verschillende situaties. De linker kant (0) is "geen pijn" en de rechter kant (100) is "ergste pijn denkbaar". Geef voor de onderstaande situaties op de lijn aan hoeveel PIJN u in de afgelopen week in de enkel had. Als een of meerdere van deze situaties niet van toepassing waren, dan kiest u de "niet van toepassing" optie. |                                                                                                                                                              |                                                                                                    |          |
| 8.1                                                                                                                                                                                                                                                                                                                                                                                                           | Wat was de hoogte van de ergste pijn in de afgelopen week?                                                                                                   | (0.00)                                                                                             | (100.00) |
| 8.2                                                                                                                                                                                                                                                                                                                                                                                                           | Heeft u pijn als u 's ochtends opstaat?                                                                                                                      | <input type="radio"/> Ja<br><input type="radio"/> Nee<br><input type="radio"/> Niet van toepassing |          |
| 8.2.1                                                                                                                                                                                                                                                                                                                                                                                                         | <b><i>If 'Heeft u pijn als u 's ochtends opstaat?' is equal to 'Ja' answer this question:</i></b><br>Hoeveel pijn heeft u voordat u 's ochtends opstaat?     | (0.00)                                                                                             | (100.00) |
| 8.3                                                                                                                                                                                                                                                                                                                                                                                                           | Heeft u pijn wanneer u op blote voeten loopt?                                                                                                                | <input type="radio"/> Ja<br><input type="radio"/> Nee<br><input type="radio"/> Niet van toepassing |          |
| 8.3.1                                                                                                                                                                                                                                                                                                                                                                                                         | <b><i>If 'Heeft u pijn wanneer u op blote voeten loopt?' is equal to 'Ja' answer this question:</i></b><br>Hoeveel pijn heeft u als u op blote voeten loopt? | (0.00)                                                                                             | (100.00) |

|    |       |                                                                                                              |                                           |
|----|-------|--------------------------------------------------------------------------------------------------------------|-------------------------------------------|
| 1  |       |                                                                                                              |                                           |
| 2  | 8.4   | Heeft u pijn wanneer u op blote voeten staat?                                                                | <input type="radio"/> Ja                  |
| 3  |       |                                                                                                              | <input type="radio"/> Nee                 |
| 4  |       |                                                                                                              | <input type="radio"/> Niet van toepassing |
| 5  |       |                                                                                                              |                                           |
| 6  |       |                                                                                                              |                                           |
| 7  |       |                                                                                                              |                                           |
| 8  | 8.4.1 | <b>If 'Heeft u pijn wanneer u op blote voeten staat?' is equal to 'Ja' answer this question:</b>             | (0.00) (100.00)                           |
| 9  |       | Hoeveel pijn heeft u als u op blote voeten staat?                                                            |                                           |
| 10 |       |                                                                                                              |                                           |
| 11 |       |                                                                                                              |                                           |
| 12 | 8.5   | Heeft u pijn wanneer u met schoenen loopt?                                                                   | <input type="radio"/> Ja                  |
| 13 |       |                                                                                                              | <input type="radio"/> Nee                 |
| 14 |       |                                                                                                              | <input type="radio"/> Niet van toepassing |
| 15 |       |                                                                                                              |                                           |
| 16 |       |                                                                                                              |                                           |
| 17 |       |                                                                                                              |                                           |
| 18 | 8.5.1 | <b>If 'Heeft u pijn wanneer u met schoenen loopt?' is equal to 'Ja' answer this question:</b>                | (0.00) (100.00)                           |
| 19 |       | Hoeveel pijn heeft u wanneer u met schoenen loopt?                                                           |                                           |
| 20 |       |                                                                                                              |                                           |
| 21 |       |                                                                                                              |                                           |
| 22 | 8.6   | Heeft u pijn wanneer u met schoenen staat?                                                                   | <input type="radio"/> Ja                  |
| 23 |       |                                                                                                              | <input type="radio"/> Nee                 |
| 24 |       |                                                                                                              | <input type="radio"/> Niet van toepassing |
| 25 |       |                                                                                                              |                                           |
| 26 |       |                                                                                                              |                                           |
| 27 |       |                                                                                                              |                                           |
| 28 | 8.6.1 | <b>If 'Heeft u pijn wanneer u met schoenen staat?' is equal to 'Ja' answer this question:</b>                | (0.00) (100.00)                           |
| 29 |       | Hoeveel pijn heeft u wanneer u met schoenen staat?                                                           |                                           |
| 30 |       |                                                                                                              |                                           |
| 31 |       |                                                                                                              |                                           |
| 32 | 8.7   | Heeft u pijn wanneer u loopt met steunzolen of een brace?                                                    | <input type="radio"/> Ja                  |
| 33 |       |                                                                                                              | <input type="radio"/> Nee                 |
| 34 |       |                                                                                                              | <input type="radio"/> Niet van toepassing |
| 35 |       |                                                                                                              |                                           |
| 36 |       |                                                                                                              |                                           |
| 37 |       |                                                                                                              |                                           |
| 38 | 8.7.1 | <b>If 'Heeft u pijn wanneer u loopt met steunzolen of een brace?' is equal to 'Ja' answer this question:</b> | (0.00) (100.00)                           |
| 39 |       | Hoeveel pijn heeft u wanneer u loopt met steunzolen of een brace?                                            |                                           |
| 40 |       |                                                                                                              |                                           |
| 41 |       |                                                                                                              |                                           |
| 42 |       |                                                                                                              |                                           |
| 43 | 8.8   | Heeft u pijn wanneer u staat met steunzolen of een brace?                                                    | <input type="radio"/> Ja                  |
| 44 |       |                                                                                                              | <input type="radio"/> Nee                 |
| 45 |       |                                                                                                              | <input type="radio"/> Niet van toepassing |
| 46 |       |                                                                                                              |                                           |
| 47 |       |                                                                                                              |                                           |
| 48 |       |                                                                                                              |                                           |
| 49 | 8.8.1 | <b>If 'Heeft u pijn wanneer u staat met steunzolen of een brace?' is equal to 'Ja' answer this question:</b> | (0.00) (100.00)                           |
| 50 |       | Hoeveel pijn heeft u wanneer u staat met steunzolen of een brace?                                            |                                           |
| 51 |       |                                                                                                              |                                           |
| 52 |       |                                                                                                              |                                           |
| 53 |       |                                                                                                              |                                           |
| 54 | 8.9   | Heeft u pijn aan het einde van de dag?                                                                       | <input type="radio"/> Ja                  |
| 55 |       |                                                                                                              | <input type="radio"/> Nee                 |
| 56 |       |                                                                                                              | <input type="radio"/> Niet van toepassing |
| 57 |       |                                                                                                              |                                           |
| 58 |       |                                                                                                              |                                           |
| 59 |       |                                                                                                              |                                           |
| 60 |       |                                                                                                              |                                           |

|    |        |                                                                                                              |                                           |
|----|--------|--------------------------------------------------------------------------------------------------------------|-------------------------------------------|
| 1  |        |                                                                                                              |                                           |
| 2  | 8.9.1  | <b>If 'Heeft u pijn aan het einde van de dag?' is equal to 'Ja' answer this question:</b>                    | (0.00) (100.00)                           |
| 3  |        | Hoeveel pijn heeft u aan het einde van de dag?                                                               |                                           |
| 4  |        |                                                                                                              |                                           |
| 5  |        |                                                                                                              |                                           |
| 6  |        | Instructies:De lijn naast elke vraag staat voor hoeveel MOEITE u heeft met verschillende activiteiten.       |                                           |
| 7  |        | De linker kant (0) is "Niet moeilijk" en de rechter kant (100) is "Te moeilijk, niet uitvoerbaar". Geef voor |                                           |
| 8  |        | de onderstaande activiteiten op de lijn aan hoeveel MOEITE u in de afgelopen week door                       |                                           |
| 9  |        | enkelklachten had met onderstaande activiteiten. Als een situatie niet van toepassing is, kies dan de        |                                           |
| 10 |        | optie "niet van toepassing".                                                                                 |                                           |
| 11 |        |                                                                                                              |                                           |
| 12 |        |                                                                                                              |                                           |
| 13 | 8.10   | Heeft u moeite met door het huis lopen?                                                                      | <input type="radio"/> Ja                  |
| 14 |        |                                                                                                              | <input type="radio"/> Nee                 |
| 15 |        |                                                                                                              | <input type="radio"/> Niet van toepassing |
| 16 |        |                                                                                                              |                                           |
| 17 |        |                                                                                                              |                                           |
| 18 | 8.10.1 | <b>If 'Heeft u moeite met door het huis lopen?' is equal to 'Ja' answer this question:</b>                   | (0.00) (100.00)                           |
| 19 |        | Hoeveel moeite heeft u met door het huis lopen?                                                              |                                           |
| 20 |        |                                                                                                              |                                           |
| 21 |        |                                                                                                              |                                           |
| 22 |        |                                                                                                              |                                           |
| 23 | 8.11   | Heeft u moeite met buiten lopen op oneven ondergrond?                                                        | <input type="radio"/> Ja                  |
| 24 |        |                                                                                                              | <input type="radio"/> Nee                 |
| 25 |        |                                                                                                              | <input type="radio"/> Niet van toepassing |
| 26 |        |                                                                                                              |                                           |
| 27 |        |                                                                                                              |                                           |
| 28 | 8.11.1 | <b>If 'Heeft u moeite met buiten lopen op oneven ondergrond?' is equal to 'Ja' answer this question:</b>     | (0.00) (100.00)                           |
| 29 |        | Hoeveel moeite heeft u met buiten lopen op oneven ondergrond?                                                |                                           |
| 30 |        |                                                                                                              |                                           |
| 31 |        |                                                                                                              |                                           |
| 32 |        |                                                                                                              |                                           |
| 33 |        |                                                                                                              |                                           |
| 34 | 8.12   | Heeft u moeite met een paar honderd meter lopen?                                                             | <input type="radio"/> Ja                  |
| 35 |        |                                                                                                              | <input type="radio"/> Nee                 |
| 36 |        |                                                                                                              | <input type="radio"/> Niet van toepassing |
| 37 |        |                                                                                                              |                                           |
| 38 |        |                                                                                                              |                                           |
| 39 | 8.12.1 | <b>If 'Heeft u moeite met een paar honderd meter lopen?' is equal to 'Ja' answer this question:</b>          | (0.00) (100.00)                           |
| 40 |        | Hoeveel moeite heeft u met een paar honderd meter lopen?                                                     |                                           |
| 41 |        |                                                                                                              |                                           |
| 42 |        |                                                                                                              |                                           |
| 43 |        |                                                                                                              |                                           |
| 44 |        |                                                                                                              |                                           |
| 45 | 8.13   | Heeft u moeite met een trap oplopen?                                                                         | <input type="radio"/> Ja                  |
| 46 |        |                                                                                                              | <input type="radio"/> Nee                 |
| 47 |        |                                                                                                              | <input type="radio"/> Niet van toepassing |
| 48 |        |                                                                                                              |                                           |
| 49 |        |                                                                                                              |                                           |
| 50 | 8.13.1 | <b>If 'Heeft u moeite met een trap oplopen?' is equal to 'Ja' answer this question:</b>                      | (0.00) (100.00)                           |
| 51 |        | Hoeveel moeite heeft u met een trap oplopen?                                                                 |                                           |
| 52 |        |                                                                                                              |                                           |
| 53 |        |                                                                                                              |                                           |
| 54 |        |                                                                                                              |                                           |
| 55 | 8.14   | Heeft u moeite met een trap aflopen?                                                                         | <input type="radio"/> Ja                  |
| 56 |        |                                                                                                              | <input type="radio"/> Nee                 |
| 57 |        |                                                                                                              | <input type="radio"/> Niet van toepassing |
| 58 |        |                                                                                                              |                                           |
| 59 |        |                                                                                                              |                                           |
| 60 |        |                                                                                                              |                                           |

|    |        |                                                                                                                    |                                           |          |
|----|--------|--------------------------------------------------------------------------------------------------------------------|-------------------------------------------|----------|
| 1  |        |                                                                                                                    |                                           |          |
| 2  | 8.14.1 | <b><i>If 'Heeft u moeite met een trap aflopen?' is equal to 'Ja' answer this question:</i></b>                     | (0.00)                                    | (100.00) |
| 3  |        | Hoeveel moeite heeft u met een trap aflopen?                                                                       |                                           |          |
| 4  |        |                                                                                                                    |                                           |          |
| 5  |        |                                                                                                                    |                                           |          |
| 6  | 8.15   | Heeft u moeite met op de tenen staan?                                                                              | <input type="radio"/> Ja                  |          |
| 7  |        |                                                                                                                    | <input type="radio"/> Nee                 |          |
| 8  |        |                                                                                                                    | <input type="radio"/> Niet van toepassing |          |
| 9  |        |                                                                                                                    |                                           |          |
| 10 |        |                                                                                                                    |                                           |          |
| 11 |        |                                                                                                                    |                                           |          |
| 12 | 8.15.1 | <b><i>If 'Heeft u moeite met op de tenen staan?' is equal to 'Ja' answer this question:</i></b>                    | (0.00)                                    | (100.00) |
| 13 |        | Hoeveel moeite heeft u met op de tenen staan?                                                                      |                                           |          |
| 14 |        |                                                                                                                    |                                           |          |
| 15 |        |                                                                                                                    |                                           |          |
| 16 | 8.16   | Heeft u moeite met opstaan uit de stoel?                                                                           | <input type="radio"/> Ja                  |          |
| 17 |        |                                                                                                                    | <input type="radio"/> Nee                 |          |
| 18 |        |                                                                                                                    | <input type="radio"/> Niet van toepassing |          |
| 19 |        |                                                                                                                    |                                           |          |
| 20 |        |                                                                                                                    |                                           |          |
| 21 |        |                                                                                                                    |                                           |          |
| 22 | 8.16.1 | <b><i>If 'Heeft u moeite met opstaan uit de stoel?' is equal to 'Ja' answer this question:</i></b>                 | (0.00)                                    | (100.00) |
| 23 |        | Hoeveel moeite heeft u met opstaan uit de stoel?                                                                   |                                           |          |
| 24 |        |                                                                                                                    |                                           |          |
| 25 |        |                                                                                                                    |                                           |          |
| 26 | 8.17   | Heeft u moeite met het op- of afstappen van stoepranden?                                                           | <input type="radio"/> Ja                  |          |
| 27 |        |                                                                                                                    | <input type="radio"/> Nee                 |          |
| 28 |        |                                                                                                                    | <input type="radio"/> Niet van toepassing |          |
| 29 |        |                                                                                                                    |                                           |          |
| 30 |        |                                                                                                                    |                                           |          |
| 31 |        |                                                                                                                    |                                           |          |
| 32 | 8.17.1 | <b><i>If 'Heeft u moeite met het op- of afstappen van stoepranden?' is equal to 'Ja' answer this question:</i></b> | (0.00)                                    | (100.00) |
| 33 |        | Hoeveel moeite heeft u met het op- of afstappen van stoepranden?                                                   |                                           |          |
| 34 |        |                                                                                                                    |                                           |          |
| 35 |        |                                                                                                                    |                                           |          |
| 36 |        |                                                                                                                    |                                           |          |
| 37 |        |                                                                                                                    |                                           |          |
| 38 |        |                                                                                                                    |                                           |          |
| 39 | 8.18   | Heeft u moeite met snel lopen of rennen?                                                                           | <input type="radio"/> Ja                  |          |
| 40 |        |                                                                                                                    | <input type="radio"/> Nee                 |          |
| 41 |        |                                                                                                                    | <input type="radio"/> Niet van toepassing |          |
| 42 |        |                                                                                                                    |                                           |          |
| 43 |        |                                                                                                                    |                                           |          |
| 44 | 8.18.1 | <b><i>If 'Heeft u moeite met snel lopen of rennen?' is equal to 'Ja' answer this question:</i></b>                 | (0.00)                                    | (100.00) |
| 45 |        | Hoeveel moeite heeft u met snel lopen of rennen?                                                                   |                                           |          |
| 46 |        |                                                                                                                    |                                           |          |
| 47 |        |                                                                                                                    |                                           |          |
| 48 |        |                                                                                                                    |                                           |          |
| 49 |        |                                                                                                                    |                                           |          |
| 50 |        |                                                                                                                    |                                           |          |
| 51 |        |                                                                                                                    |                                           |          |
| 52 |        |                                                                                                                    |                                           |          |

## Vragenlijst PRIMA studie - FAOS

| Number | Question | Answers |
|--------|----------|---------|
|--------|----------|---------|

Deze lijst vraagt naar uw mening over uw voet/enkel. Uw antwoorden geven ons een beeld van uw voet/enkel klachten en hoe u in staat bent om alledaagse activiteiten uit te voeren in uw huidige situatie. Beantwoorden van een vraag doet u door het aanklikken van een vakje met het volgens u meest juiste antwoord (één vakje per vraag). Als u niet zeker weet hoe u een vraag moet beantwoorden, geeft u dan het antwoord dat volgens u het meest op uw situatie van toepassing is. Deze vraag heeft betrekking op het voorkomen van voet/enkel klachten in de afgelopen week.

- |      |                                                                                                             |                                    |                                    |                              |                               |
|------|-------------------------------------------------------------------------------------------------------------|------------------------------------|------------------------------------|------------------------------|-------------------------------|
| 9.1  | Is uw voet/enkel gezwollen?                                                                                 | <input type="radio"/> Nooit        | <input type="radio"/> Zelden       | <input type="radio"/> Soms   | <input type="radio"/>         |
|      |                                                                                                             | Vaak                               | <input type="radio"/> Altijd       |                              |                               |
| 9.2  | Voelt u gekraak of hoort u klikken of een ander vreemd geluid wanneer u de voet/enkel beweegt?              | <input type="radio"/> Nooit        | <input type="radio"/> Zelden       | <input type="radio"/> Soms   | <input type="radio"/>         |
|      |                                                                                                             | Vaak                               | <input type="radio"/> Altijd       |                              |                               |
| 9.3  | Hapert uw enkel of blokkeert uw enkel ('op slot' gaan zitten) wanneer u deze beweegt?                       | <input type="radio"/> Nooit        | <input type="radio"/> Zelden       | <input type="radio"/> Soms   | <input type="radio"/>         |
|      |                                                                                                             | Vaak                               | <input type="radio"/> Altijd       |                              |                               |
| 9.4  | Kunt u de voet/enkel volledig strekken?                                                                     | <input type="radio"/> Altijd       | <input type="radio"/> Vaak         | <input type="radio"/> Soms   | <input type="radio"/>         |
|      |                                                                                                             | Zelden                             | <input type="radio"/> Nooit        |                              |                               |
| 9.5  | Kunt u de voet volledig naar u toe buigen?                                                                  | <input type="radio"/> Altijd       | <input type="radio"/> Vaak         | <input type="radio"/> Soms   | <input type="radio"/>         |
|      |                                                                                                             | Zelden                             | <input type="radio"/> Nooit        |                              |                               |
| 9.6  | In welke mate heeft u een stijf gevoel in de voet/enkel 's ochtends bij het wakker worden?                  | <input type="radio"/> Niet         | <input type="radio"/> Mild         | <input type="radio"/> Matig  | <input type="radio"/>         |
|      |                                                                                                             | Ernstig                            | <input type="radio"/> Zeer ernstig |                              |                               |
| 9.7  | In welke mate heeft u een stijf gevoel in de voet/enkel na zitten, liggen of rusten later op de dag?        | <input type="radio"/> Niet         | <input type="radio"/> Mild         | <input type="radio"/> Matig  | <input type="radio"/>         |
|      |                                                                                                             | Ernstig                            | <input type="radio"/> Zeer ernstig |                              |                               |
| 9.8  | Hoe vaak heeft u pijn in uw voet/enkel?                                                                     | <input type="radio"/> Nooit        | <input type="radio"/> Maandelijks  | <input type="radio"/>        |                               |
|      |                                                                                                             | Wekelijks                          | <input type="radio"/> Dagelijks    | <input type="radio"/> Altijd |                               |
| 9.9  | Hoeveel voet/enkel pijn heeft u gehad in de afgelopen week bij draaien als uw voet/enkel op de grond staat? | <input type="radio"/> Geen         | <input type="radio"/> Mild         | <input type="radio"/> Matig  | <input type="radio"/> Ernstig |
|      |                                                                                                             | <input type="radio"/> Zeer ernstig |                                    |                              |                               |
| 9.10 | Hoeveel voet/enkel pijn heeft u gehad in de afgelopen week bij het volledig uitstrekken van de voet/enkel?  | <input type="radio"/> Geen         | <input type="radio"/> Mild         | <input type="radio"/> Matig  | <input type="radio"/> Ernstig |
|      |                                                                                                             | <input type="radio"/> Zeer ernstig |                                    |                              |                               |

- 1  
2  
3  
4  
5  
6  
7  
8  
9
- 
- 10  
11  
12  
13  
14  
15  
16  
17  
18
- 19  
20  
21  
22  
23  
24  
25  
26
- 
- 27  
28  
29  
30  
31  
32  
33  
34  
35
- 
- 36  
37  
38  
39  
40  
41  
42  
43
- 
- 44  
45  
46  
47  
48  
49  
50  
51
- 
- 52  
53  
54  
55  
56
- 
- 57  
58  
59  
60
- 9.11 Hoeveel voet/enkel pijn heeft u gehad in de afgelopen week bij het volledig naar u toe buigen/optrekken van de voet/enkel
- Geen  
 Mild  
 Matig  
 Ernstig  
 Zeer ernstig
- 9.12 Hoeveel voet/enkel pijn heeft u gehad in de afgelopen week bij het lopen op een vlakke ondergrond
- Geen  
 Mild  
 Matig  
 Ernstig  
 Zeer ernstig
- 9.13 Hoeveel voet/enkel pijn heeft u gehad in de afgelopen week bij het trap op- en trap af lopen?
- Geen  
 Mild  
 Matig  
 Ernstig  
 Zeer ernstig
- 9.14 Hoeveel voet/enkel pijn heeft u gehad in de afgelopen week 's nachts in bed?
- Geen  
 Mild  
 Matig  
 Ernstig  
 Zeer ernstig
- 9.15 Hoeveel voet/enkel pijn heeft u gehad in de afgelopen week bij het zitten of liggen?
- Geen  
 Mild  
 Matig  
 Ernstig  
 Zeer ernstig
- 9.16 Hoeveel voet/enkel pijn heeft u gehad in de afgelopen week bij het rechtop staan?
- Geen  
 Mild  
 Matig  
 Ernstig  
 Zeer ernstig
- 9.17 In welke mate werd u gehinderd bij het trap aflopen?
- Niet  Mild  Matig   
Ernstig  Zeer ernstig
- 9.18 In welke mate werd u gehinderd bij het trap op lopen?
- Niet  Mild  Matig   
Ernstig  Zeer ernstig

1  
2  
3  
4  
5  
6  
7  
8  
9  
10  
11  
12  
13  
14  
15  
16  
17  
18  
19  
20  
21  
22  
23  
24  
25  
26  
27  
28  
29  
30  
31  
32  
33  
34  
35  
36  
37  
38  
39  
40  
41  
42  
43  
44  
45  
46  
47  
48  
49  
50  
51  
52  
53  
54  
55  
56  
57  
58  
59  
60

|      |                                                                                                                        |                                       |                                                                  |                             |                       |
|------|------------------------------------------------------------------------------------------------------------------------|---------------------------------------|------------------------------------------------------------------|-----------------------------|-----------------------|
| 9.19 | In welke mate werd u gehinderd als u vanuit een zittende positie ging staan?                                           | <input type="radio"/> Niet<br>Ernstig | <input type="radio"/> Mild<br><input type="radio"/> Zeer ernstig | <input type="radio"/> Matig | <input type="radio"/> |
| 9.20 | In welke mate werd u gehinderd bij het staan?                                                                          | <input type="radio"/> Niet<br>Ernstig | <input type="radio"/> Mild<br><input type="radio"/> Zeer ernstig | <input type="radio"/> Matig | <input type="radio"/> |
| 9.21 | In welke mate werd u gehinderd bij het naar de grond buigen/iets oprapen?                                              | <input type="radio"/> Niet<br>Ernstig | <input type="radio"/> Mild<br><input type="radio"/> Zeer ernstig | <input type="radio"/> Matig | <input type="radio"/> |
| 9.22 | In welke mate werd u gehinderd bij het lopen op een vlakke ondergrond?                                                 | <input type="radio"/> Niet<br>Ernstig | <input type="radio"/> Mild<br><input type="radio"/> Zeer ernstig | <input type="radio"/> Matig | <input type="radio"/> |
| 9.23 | In welke mate werd u gehinderd bij het in- en uit de auto stappen?                                                     | <input type="radio"/> Niet<br>Ernstig | <input type="radio"/> Mild<br><input type="radio"/> Zeer ernstig | <input type="radio"/> Matig | <input type="radio"/> |
| 9.24 | In welke mate werd u gehinderd bij het boodschappen doen?                                                              | <input type="radio"/> Niet<br>Ernstig | <input type="radio"/> Mild<br><input type="radio"/> Zeer ernstig | <input type="radio"/> Matig | <input type="radio"/> |
| 9.25 | In welke mate werd u gehinderd bij sokken/panty's aantrekken?                                                          | <input type="radio"/> Niet<br>Ernstig | <input type="radio"/> Mild<br><input type="radio"/> Zeer ernstig | <input type="radio"/> Matig | <input type="radio"/> |
| 9.26 | In welke mate werd u gehinderd bij het opstaan uit bed?                                                                | <input type="radio"/> Niet<br>Ernstig | <input type="radio"/> Mild<br><input type="radio"/> Zeer ernstig | <input type="radio"/> Matig | <input type="radio"/> |
| 9.27 | In welke mate werd u gehinderd bij het sokken uittrekken?                                                              | <input type="radio"/> Niet<br>Ernstig | <input type="radio"/> Mild<br><input type="radio"/> Zeer ernstig | <input type="radio"/> Matig | <input type="radio"/> |
| 9.28 | In welke mate werd u gehinderd bij het in bed liggen (omdraaien, lange tijd uw voet/enkel in dezelfde positie houden)? | <input type="radio"/> Niet<br>Ernstig | <input type="radio"/> Mild<br><input type="radio"/> Zeer ernstig | <input type="radio"/> Matig | <input type="radio"/> |
| 9.29 | In welke mate werd u gehinderd bij het in/uit bad stappen?                                                             | <input type="radio"/> Niet<br>Ernstig | <input type="radio"/> Mild<br><input type="radio"/> Zeer ernstig | <input type="radio"/> Matig | <input type="radio"/> |
| 9.30 | In welke mate werd u gehinderd bij zitten?                                                                             | <input type="radio"/> Niet<br>Ernstig | <input type="radio"/> Mild<br><input type="radio"/> Zeer ernstig | <input type="radio"/> Matig | <input type="radio"/> |
| 9.31 | In welke mate werd u gehinderd bij het toilet op en af gaan?                                                           | <input type="radio"/> Niet<br>Ernstig | <input type="radio"/> Mild<br><input type="radio"/> Zeer ernstig | <input type="radio"/> Matig | <input type="radio"/> |

|                                                    |      |                                                                                                                  |                                                                                                                                                                                              |
|----------------------------------------------------|------|------------------------------------------------------------------------------------------------------------------|----------------------------------------------------------------------------------------------------------------------------------------------------------------------------------------------|
| 1<br>2<br>3<br>4<br>5                              | 9.32 | In welke mate werd u gehinderd bij zwaar huishoudelijk werk (bijvoorbeeld zware dozen sjouwen, vloer schrobben)? | <input type="radio"/> Niet<br><input type="radio"/> Ernstig <input type="radio"/> Mild<br><input type="radio"/> Zeer ernstig <input type="radio"/> Matig<br><input type="radio"/>            |
| 6<br>7<br>8<br>9                                   | 9.33 | In welke mate werd u gehinderd bij licht huishoudelijk werk (bijvoorbeeld koken, afstoffen)?                     | <input type="radio"/> Niet<br><input type="radio"/> Ernstig <input type="radio"/> Mild<br><input type="radio"/> Zeer ernstig <input type="radio"/> Matig<br><input type="radio"/>            |
| 10<br>11<br>12<br>13<br>14                         | 9.34 | In welke mate werd u gehinderd bij hurken?                                                                       | <input type="radio"/> Niet<br><input type="radio"/> Ernstig <input type="radio"/> Mild<br><input type="radio"/> Zeer ernstig <input type="radio"/> Matig<br><input type="radio"/>            |
| 15<br>16<br>17<br>18                               | 9.35 | In welke mate werd u gehinderd bij hardlopen?                                                                    | <input type="radio"/> Niet<br><input type="radio"/> Ernstig <input type="radio"/> Mild<br><input type="radio"/> Zeer ernstig <input type="radio"/> Matig<br><input type="radio"/>            |
| 19<br>20<br>21<br>22<br>23                         | 9.36 | In welke mate werd u gehinderd bij springen?                                                                     | <input type="radio"/> Niet<br><input type="radio"/> Ernstig <input type="radio"/> Mild<br><input type="radio"/> Zeer ernstig <input type="radio"/> Matig<br><input type="radio"/>            |
| 24<br>25<br>26<br>27                               | 9.37 | In welke mate werd u gehinderd bij ronddraaien op uw aangedane voet/enkel?                                       | <input type="radio"/> Niet<br><input type="radio"/> Ernstig <input type="radio"/> Mild<br><input type="radio"/> Zeer ernstig <input type="radio"/> Matig<br><input type="radio"/>            |
| 28<br>29<br>30<br>31<br>32                         | 9.38 | In welke mate werd u gehinderd bij knielen?                                                                      | <input type="radio"/> Niet<br><input type="radio"/> Ernstig <input type="radio"/> Mild<br><input type="radio"/> Zeer ernstig <input type="radio"/> Matig<br><input type="radio"/>            |
| 33<br>34<br>35<br>36                               | 9.39 | Hoe vaak bent u zich bewust van uw voet/enkel probleem?                                                          | <input type="radio"/> Nooit<br><input type="radio"/> Wekelijks<br><input type="radio"/> Maandelijks<br><input type="radio"/> Dagelijks<br><input type="radio"/> Altijd <input type="radio"/> |
| 37<br>38<br>39<br>40<br>41<br>42<br>43<br>44       | 9.40 | Heeft u uw leven veranderd om activiteiten te vermijden die schadelijk kunnen zijn voor uw voet/enkel?           | <input type="radio"/> Niet<br><input type="radio"/> Enigszins<br><input type="radio"/> Matig<br><input type="radio"/> Behoorlijk<br><input type="radio"/> Volledig <input type="radio"/>     |
| 45<br>46<br>47<br>48<br>49<br>50<br>51<br>52<br>53 | 9.41 | In hoeverre kunt u op uw voet/enkel vertrouwen?                                                                  | <input type="radio"/> Volledig<br><input type="radio"/> Behoorlijk<br><input type="radio"/> Matig<br><input type="radio"/> Enigszins<br><input type="radio"/> Niet <input type="radio"/>     |
| 54<br>55<br>56<br>57<br>58<br>59<br>60             | 9.42 | In het algemeen, in welke mate ondervindt u hinder van uw voet/enkel                                             | <input type="radio"/> Geen<br><input type="radio"/> Mild<br><input type="radio"/> Matig<br><input type="radio"/> Ernstig<br><input type="radio"/> Zeer ernstig <input type="radio"/>         |



## Vragenlijst PRIMA studie - PRODISQ - Gezondheid en werk

| Number | Question                                                                                                                                                                                                                                                                    | Answers                                                                                                                                                                                                                                                                                                                                                                                                                                                                                                                                                                |
|--------|-----------------------------------------------------------------------------------------------------------------------------------------------------------------------------------------------------------------------------------------------------------------------------|------------------------------------------------------------------------------------------------------------------------------------------------------------------------------------------------------------------------------------------------------------------------------------------------------------------------------------------------------------------------------------------------------------------------------------------------------------------------------------------------------------------------------------------------------------------------|
| 10.1   | Wat is uw leeftijd?                                                                                                                                                                                                                                                         | <input type="text"/> jaar                                                                                                                                                                                                                                                                                                                                                                                                                                                                                                                                              |
| 10.2   | Wat is uw geslacht?                                                                                                                                                                                                                                                         | <input type="radio"/> Man<br><input type="radio"/> Vrouw                                                                                                                                                                                                                                                                                                                                                                                                                                                                                                               |
| 10.3   | Wat is de hoogste opleiding die u heeft afgemaakt (Zoek uw hoogste opleiding en kruis het hokje daarvoor aan)?                                                                                                                                                              | <input type="checkbox"/> Ik heb geen school of opleiding afgemaakt<br><input type="checkbox"/> Lagere school of basisschool<br><input type="checkbox"/> Huishoudschool, vbo, lbo, lts, leao of lhno<br><input type="checkbox"/> Mavo, mulo, ivo of vmbo<br><input type="checkbox"/> Mbo, mts, meao, mhno, inas of intas<br><input type="checkbox"/> Havo, vwo, hbs, mms, atheneum of gymnasium<br><input type="checkbox"/> Hbo, hts, heao of hhno<br><input type="checkbox"/> Universiteit<br><input type="checkbox"/> Ik heb een andere opleiding afgemaakt, namelijk |
| 10.3.1 | <b><i>If 'Wat is de hoogste opleiding die u heeft afgemaakt (Zoek uw hoogste opleiding en kruis het hokje daarvoor aan)?' is equal to 'Ik heb een andere opleiding afgemaakt, namelijk' answer this question:</i></b><br>Wat is de hoogste opleiding die u heeft afgemaakt? | <input type="text"/>                                                                                                                                                                                                                                                                                                                                                                                                                                                                                                                                                   |
| 10.4   | Wat doet u in het dagelijks leven?                                                                                                                                                                                                                                          | <input type="checkbox"/> Ik zit op school, ik studeer<br><input type="checkbox"/> Ik werk in loondienst<br><input type="checkbox"/> Ik ben zelfstandig ondernemer<br><input type="checkbox"/> Ik ben huisvrouw, huisman<br><input type="checkbox"/> Ik ben werkloos<br><input type="checkbox"/> Ik ben arbeidsongeschikt<br><input type="checkbox"/> Ik ben met pensioen of prepensioen<br><input type="checkbox"/> Ik doe iets anders, namelijk                                                                                                                       |
| 10.4.1 | <b><i>If 'Wat doet u in het dagelijks leven?' is equal to 'Ik ben arbeidsongeschikt' answer this question:</i></b><br>Wat doet u in het dagelijks leven?                                                                                                                    | <input type="text"/>                                                                                                                                                                                                                                                                                                                                                                                                                                                                                                                                                   |

1  
2  
3  
4  
5  
6  
7  
8  
9  
10  
11  
12  
13  
14  
15  
16  
17  
18  
19  
20  
21  
22  
23  
24  
25  
26  
27  
28  
29  
30  
31  
32  
33  
34  
35  
36  
37  
38  
39  
40  
41  
42  
43  
44  
45  
46  
47  
48  
49  
50  
51  
52  
53  
54  
55  
56  
57  
58  
59  
60

|            |                                                                                                                                                                                                                                                                   |                                                                             |
|------------|-------------------------------------------------------------------------------------------------------------------------------------------------------------------------------------------------------------------------------------------------------------------|-----------------------------------------------------------------------------|
| 10.4.2     | <b>If 'Wat doet u in het dagelijks leven?' is equal to 'Ik doe iets anders, namelijk' answer this question:</b><br>Wat doet u in het dagelijks leven?                                                                                                             | <input type="text"/>                                                        |
| 10.5       | Hebt u betaald werk?                                                                                                                                                                                                                                              | <input type="radio"/> Nee<br><input type="radio"/> Ja                       |
| 10.5.1     | <b>If 'Hebt u betaald werk?' is equal to 'Ja' answer this question:</b><br>Wat is uw beroep?                                                                                                                                                                      | <input type="text"/>                                                        |
| 10.5.2     | <b>If 'Hebt u betaald werk?' is equal to 'Ja' answer this question:</b><br>Hoeveel uur per week werkt u (Tel alleen de uren waarvoor u betaald wordt)?                                                                                                            | <input type="text"/> uren                                                   |
| 10.5.3     | <b>If 'Hebt u betaald werk?' is equal to 'Ja' answer this question:</b><br>Hoeveel dagen in de week werkt u?                                                                                                                                                      | <input type="text"/> Dagen                                                  |
| 10.5.4     | <b>If 'Hebt u betaald werk?' is equal to 'Ja' answer this question:</b><br>Bent u in de afgelopen 4 weken afwezig geweest van uw werk omdat u ziek was?                                                                                                           | <input type="radio"/> Nee<br><input type="radio"/> Ja                       |
| 10.5.4.1   | <b>If 'Bent u in de afgelopen 4 weken afwezig geweest van uw werk omdat u ziek was?' is equal to 'Ja' answer this question:</b><br>Bent u in de afgelopen 4 weken afwezig geweest van uw werk omdat u ziek was (Tel alleen de werkdagen in de afgelopen 4 weken)? | <input type="text"/> dagen<br>afwezig geweest                               |
| 10.5.4.2   | <b>If 'Bent u in de afgelopen 4 weken afwezig geweest van uw werk omdat u ziek was?' is equal to 'Ja' answer this question:</b><br>Was u langer dan de gehele periode van 4 weken afwezig van uw werk doordat u ziek was?                                         | <input type="radio"/> Nee<br><input type="radio"/> Ja                       |
| 10.5.4.2.1 | <b>If 'Was u langer dan de gehele periode van 4 weken afwezig van uw werk doordat u ziek was?' is equal to 'Ja' answer this question:</b><br>Wanneer heeft u zich ziek gemeld?                                                                                    | <input type="text"/> <input type="text"/> <input type="text"/> (dd-mm-yyyy) |
| 10.5.5     | <b>If 'Hebt u betaald werk?' is equal to 'Ja' answer this question:</b><br>Waren er in de afgelopen 4 weken, dagen waarop u wel gewerkt heeft, maar tijdens uw werk last had van lichamelijke of psychische problemen?                                            | <input type="radio"/> Ja<br><input type="radio"/> Nee                       |

1  
2  
3  
4  
5  
6  
7  
8  
9  
10  
11  
12  
13  
14  
15  
16  
17  
18  
19  
20  
21  
22  
23  
24  
25  
26  
27  
28  
29  
30  
31  
32  
33  
34  
35  
36  
37  
38  
39  
40  
41  
42  
43  
44  
45  
46  
47  
48  
49  
50  
51  
52  
53  
54  
55  
56  
57  
58  
59  
60

|          |                                                                                                                                                                                                                                                                                                                                                                                                                 |                                                       |                                            |
|----------|-----------------------------------------------------------------------------------------------------------------------------------------------------------------------------------------------------------------------------------------------------------------------------------------------------------------------------------------------------------------------------------------------------------------|-------------------------------------------------------|--------------------------------------------|
| 10.5.5.1 | <b>If 'Waren er in de afgelopen 4 weken, dagen waarop u wel gewerkt heeft, maar tijdens uw werk last had van lichamelijke of psychische problemen?' is equal to 'Ja' answer this question:</b><br>Op hoeveel werkdagen had u tijdens uw werk last van uw lichamelijke of psychische problemen?                                                                                                                  | <input type="text"/>                                  | werkdagen                                  |
| 10.5.5.2 | <b>If 'Waren er in de afgelopen 4 weken, dagen waarop u wel gewerkt heeft, maar tijdens uw werk last had van lichamelijke of psychische problemen?' is equal to 'Ja' answer this question:</b><br>Op de dagen dat u last had, kon u misschien niet zoveel werk doen als normaal. Hoeveel werk kon u op deze dagen gemiddeld doen?                                                                               | Ik kon op deze dagen niks doen (0.00)                 | Ik kon net zoveel doen als normaal (10.00) |
| 10.6     | Waren er dagen waarop u minder onbetaald werk kon doen door uw lichamelijke of psychische problemen?                                                                                                                                                                                                                                                                                                            | <input type="radio"/> Nee<br><input type="radio"/> Ja |                                            |
| 10.6.1   | <b>If 'Waren er dagen waarop u minder onbetaald werk kon doen door uw lichamelijke of psychische problemen?' is equal to 'Ja' answer this question:</b><br>Op hoeveel dagen was dit zo?                                                                                                                                                                                                                         | <input type="text"/>                                  | Dagen                                      |
| 10.6.2   | <b>If 'Waren er dagen waarop u minder onbetaald werk kon doen door uw lichamelijke of psychische problemen?' is equal to 'Ja' answer this question:</b><br>Stel dat iemand, bijvoorbeeld uw partner, familielid of een bekende, u op deze dagen had geholpen. En al het onbetaalde werk wat u niet kon doen, voor u had gedaan. Hoeveel uur was die persoon hier op deze dagen dan gemiddeld mee bezig geweest? | <input type="text"/>                                  | uur op deze dagen                          |

## Vragenlijst PRIMA studie - PRODISQ - Zorggebruik

| Number | Question                                                                                                                                                                                      | Answers                                               |
|--------|-----------------------------------------------------------------------------------------------------------------------------------------------------------------------------------------------|-------------------------------------------------------|
|        | Wij willen graag weten met welke dokters u in de afgelopen 3 maanden een afspraak had. Het gaat om afspraken voor uzelf. Ook andere zorgverleners tellen mee. Bijvoorbeeld de fysiotherapeut. |                                                       |
| 11.1   | Bent u in de afgelopen 3 maanden naar uw huisarts geweest?                                                                                                                                    | <input type="radio"/> Nee<br><input type="radio"/> Ja |
| 11.1.1 | <b>If 'Bent u in de afgelopen 3 maanden naar uw huisarts geweest?' is equal to 'Ja' answer this question:</b><br>Hoeveel afspraken had u?                                                     | <input type="text"/> afspraken                        |

|    |        |                                                                                                                                                                                              |                                |
|----|--------|----------------------------------------------------------------------------------------------------------------------------------------------------------------------------------------------|--------------------------------|
| 1  |        |                                                                                                                                                                                              |                                |
| 2  | 11.2   | Bent u in de afgelopen 3 maanden in contact geweest met een maatschappelijk werker?                                                                                                          | <input type="radio"/> Nee      |
| 3  |        |                                                                                                                                                                                              | <input type="radio"/> Ja       |
| 4  |        |                                                                                                                                                                                              |                                |
| 5  |        |                                                                                                                                                                                              |                                |
| 6  | 11.2.1 | <b>If 'Bent u in de afgelopen 3 maanden in contact geweest met een maatschappelijk werker?' is equal to 'Ja' answer this question:</b>                                                       | <input type="text"/> afspraken |
| 7  |        | Hoeveel afspraken had u?                                                                                                                                                                     |                                |
| 8  |        |                                                                                                                                                                                              |                                |
| 9  |        |                                                                                                                                                                                              |                                |
| 10 |        |                                                                                                                                                                                              |                                |
| 11 |        |                                                                                                                                                                                              |                                |
| 12 | 11.3   | Bent u in de afgelopen 3 maanden naar een fysiotherapeut geweest? Of een caesartherapeut, therapeut mensendieck of een manueel therapeut?                                                    | <input type="radio"/> Nee      |
| 13 |        |                                                                                                                                                                                              | <input type="radio"/> Ja       |
| 14 |        |                                                                                                                                                                                              |                                |
| 15 |        |                                                                                                                                                                                              |                                |
| 16 | 11.3.1 | <b>If 'Bent u in de afgelopen 3 maanden naar een fysiotherapeut geweest? Of een caesartherapeut, therapeut mensendieck of een manueel therapeut?' is equal to 'Ja' answer this question:</b> | <input type="text"/> afspraken |
| 17 |        | Hoeveel afspraken had u?                                                                                                                                                                     |                                |
| 18 |        |                                                                                                                                                                                              |                                |
| 19 |        |                                                                                                                                                                                              |                                |
| 20 |        |                                                                                                                                                                                              |                                |
| 21 |        |                                                                                                                                                                                              |                                |
| 22 |        |                                                                                                                                                                                              |                                |
| 23 | 11.4   | Bent u in de afgelopen 3 maanden naar een ergotherapeut geweest?                                                                                                                             | <input type="radio"/> Nee      |
| 24 |        |                                                                                                                                                                                              | <input type="radio"/> Ja       |
| 25 |        |                                                                                                                                                                                              |                                |
| 26 |        |                                                                                                                                                                                              |                                |
| 27 | 11.4.1 | <b>If 'Bent u in de afgelopen 3 maanden naar een ergotherapeut geweest?' is equal to 'Ja' answer this question:</b>                                                                          | <input type="text"/> afspraken |
| 28 |        | Hoeveel afspraken had u?                                                                                                                                                                     |                                |
| 29 |        |                                                                                                                                                                                              |                                |
| 30 |        |                                                                                                                                                                                              |                                |
| 31 |        |                                                                                                                                                                                              |                                |
| 32 |        |                                                                                                                                                                                              |                                |
| 33 | 11.5   | Bent u in de afgelopen 3 maanden naar een logopedist geweest?                                                                                                                                | <input type="radio"/> Nee      |
| 34 |        |                                                                                                                                                                                              | <input type="radio"/> Ja       |
| 35 |        |                                                                                                                                                                                              |                                |
| 36 |        |                                                                                                                                                                                              |                                |
| 37 | 11.5.1 | <b>If 'Bent u in de afgelopen 3 maanden naar een logopedist geweest?' is equal to 'Ja' answer this question:</b>                                                                             | <input type="text"/> afspraken |
| 38 |        | Hoeveel afspraken had u?                                                                                                                                                                     |                                |
| 39 |        |                                                                                                                                                                                              |                                |
| 40 |        |                                                                                                                                                                                              |                                |
| 41 |        |                                                                                                                                                                                              |                                |
| 42 |        |                                                                                                                                                                                              |                                |
| 43 | 11.6   | Bent u in de afgelopen 3 maanden naar een diëtist geweest?                                                                                                                                   | <input type="radio"/> Nee      |
| 44 |        |                                                                                                                                                                                              | <input type="radio"/> Ja       |
| 45 |        |                                                                                                                                                                                              |                                |
| 46 |        |                                                                                                                                                                                              |                                |
| 47 | 11.6.1 | <b>If 'Bent u in de afgelopen 3 maanden naar een diëtist geweest?' is equal to 'Ja' answer this question:</b>                                                                                | <input type="text"/> afspraken |
| 48 |        | Hoeveel afspraken had u?                                                                                                                                                                     |                                |
| 49 |        |                                                                                                                                                                                              |                                |
| 50 |        |                                                                                                                                                                                              |                                |
| 51 |        |                                                                                                                                                                                              |                                |
| 52 | 11.7   | Bent u in de afgelopen 3 maanden naar een homeopaat geweest? Of een acupuncturist?                                                                                                           | <input type="radio"/> Nee      |
| 53 |        |                                                                                                                                                                                              | <input type="radio"/> Ja       |
| 54 |        |                                                                                                                                                                                              |                                |
| 55 |        |                                                                                                                                                                                              |                                |
| 56 | 11.7.1 | <b>If 'Bent u in de afgelopen 3 maanden naar een homeopaat geweest? Of een acupuncturist?' is equal to 'Ja' answer this question:</b>                                                        | <input type="text"/> afspraken |
| 57 |        | Hoeveel afspraken had u?                                                                                                                                                                     |                                |
| 58 |        |                                                                                                                                                                                              |                                |
| 59 |        |                                                                                                                                                                                              |                                |
| 60 |        |                                                                                                                                                                                              |                                |

1  
2  
3  
4  
5

11.8 Bent u in de afgelopen 3 maanden naar een psycholoog geweest? Of een psychotherapeut of psychiater?

Nee  
 Ja

6  
7  
8  
9  
10

11.8.1 ***If 'Bent u in de afgelopen 3 maanden naar een psycholoog geweest? Of een psychotherapeut of psychiater?' is equal to 'Ja' answer this question:***  
Hoeveel afspraken had u?

afspraken

11  
12  
13  
14  
15

11.9 Heeft u in de afgelopen 3 maanden afspraken gehad met de bedrijfsarts?

Nee  
 Ja

16  
17  
18  
19  
20

11.9.1 ***If 'Heeft u in de afgelopen 3 maanden afspraken gehad met de bedrijfsarts?' is equal to 'Ja' answer this question:***  
Hoeveel afspraken had u?

afspraken

21  
22  
23  
24  
25

11.10 Heeft u in de afgelopen 3 maanden hulp van de thuiszorg gehad?

Ja  
 Nee

26  
27  
28  
29  
30  
31  
32  
33  
34  
35  
36

11.10.1 ***If 'Heeft u in de afgelopen 3 maanden hulp van de thuiszorg gehad?' is equal to 'Ja' answer this question:***  
Wat voor hulp van de thuiszorg heeft u gehad in de afgelopen 3 maanden?

Huishoudelijke hulp; voorbeeld: stofzuigen, bed opmaken, boodschappen doen  
 Verzorging van uzelf; voorbeeld: hulp bij douchen of aankleden  
 Verpleging; voorbeeld: verband omdoen, medicijnen geven, bloeddruk meten

37  
38  
39  
40  
41  
42  
43  
44

11.10.1.1 ***If 'Wat voor hulp van de thuiszorg heeft u gehad in de afgelopen 3 maanden?' is equal to 'Huishoudelijke hulp; voorbeeld: stofzuigen, bed opmaken, boodschappen doen' answer this question:***  
Hoeveel weken heeft u deze thuiszorg gehad?  
Huishoudelijke hulp:

weken in de afgelopen 3 maanden

45  
46  
47  
48  
49  
50  
51  
52

11.10.1.2 ***If 'Wat voor hulp van de thuiszorg heeft u gehad in de afgelopen 3 maanden?' is equal to 'Verzorging van uzelf; voorbeeld: hulp bij douchen of aankleden' answer this question:***  
Hoeveel weken heeft u deze thuiszorg gehad?  
Verzorging van uzelf:

weken in de afgelopen 3 maanden

53  
54  
55  
56  
57  
58  
59  
60

11.10.1.3 ***If 'Wat voor hulp van de thuiszorg heeft u gehad in de afgelopen 3 maanden?' is equal to 'Verpleging; voorbeeld: verband omdoen, medicijnen geven, bloeddruk meten' answer this question:***  
Hoeveel weken heeft u deze thuiszorg gehad?  
Verpleging:

weken in de afgelopen 3 maanden

1  
2  
3  
4  
5  
6  
7  
8  
9

11.10.1.4 **If 'Wat voor hulp van de thuiszorg heeft u gehad in de afgelopen 3 maanden?' is equal to 'Huishoudelijke hulp; voorbeeld: stofzuigen, bed opmaken, boodschappen doen' answer this question:**

uur in de week

Hoeveel uur thuiszorg kreeg u in deze weken gemiddeld? Huishoudelijke hulp: gemiddeld

10  
11  
12  
13  
14  
15  
16  
17

11.10.1.5 **If 'Wat voor hulp van de thuiszorg heeft u gehad in de afgelopen 3 maanden?' is equal to 'Verzorging van uzelf; voorbeeld: hulp bij douchen of aankleden' answer this question:**

uur in de week

Hoeveel uur thuiszorg kreeg u in deze weken gemiddeld? Verzorging van uzelf: gemiddeld

18  
19  
20  
21  
22  
23  
24  
25

11.10.1.6 **If 'Wat voor hulp van de thuiszorg heeft u gehad in de afgelopen 3 maanden?' is equal to 'Verpleging; voorbeeld: verband omdoen, medicijnen geven, bloeddruk meten' answer this question:**

uur in de week

Hoeveel uur thuiszorg kreeg u in deze weken gemiddeld? Verpleging: gemiddeld

26  
27  
28  
29

11.11 Heeft u in de afgelopen 3 maanden medicijnen gebruikt?

Ja  
 Nee

30  
31  
32  
33  
34  
35

11.11.1 **If 'Heeft u in de afgelopen 3 maanden medicijnen gebruikt?' is equal to 'Ja' answer this question:**  
Welke medicijnen heeft u in de afgelopen 3 maanden gebruikt?

36  
37  
38  
39  
40

11.12 Bent u in de afgelopen 3 maanden op de spoedeisende eerste hulp van een ziekenhuis geweest? (Een andere naam voor spoedeisende eerste hulp is EHBO)

Nee  
 Ja

41  
42  
43  
44  
45  
46  
47

11.12.1 **If 'Bent u in de afgelopen 3 maanden op de spoedeisende eerste hulp van een ziekenhuis geweest? (Een andere naam voor spoedeisende eerste hulp is EHBO)' is equal to 'Ja' answer this question:**

keer

Hoe vaak bent u geweest?

48  
49  
50  
51  
52

11.13 Bent u in de afgelopen 3 maanden met een ambulance naar het ziekenhuis gebracht? (Een andere naam voor ambulance is ziekenauto)

Nee  
 Ja

53  
54  
55  
56  
57  
58  
59  
60

11.13.1 **If 'Bent u in de afgelopen 3 maanden met een ambulance naar het ziekenhuis gebracht? (Een andere naam voor ambulance is ziekenauto)' is equal to 'Ja' answer this question:**

keer

Hoe vaak bent u naar het ziekenhuis gebracht?

1  
2  
3  
4  
5  
6

11.14 Had u in de afgelopen 3 maanden een afspraak bij de polikliniek van het ziekenhuis? (Het gaat om afspraken voor uzelf met een dokter. Bijvoorbeeld met de cardioloog, reumatoloog of neuroloog)

Ja  
 Nee

7  
8  
9  
10  
11  
12  
13  
14  
15

11.14.1 **If 'Had u in de afgelopen 3 maanden een afspraak bij de polikliniek van het ziekenhuis? (Het gaat om afspraken voor uzelf met een dokter. Bijvoorbeeld met de cardioloog, reumatoloog of neuroloog)' is equal to 'Ja' answer this question:**  
Bij welke soorten dokters bent u in de afgelopen 3 maanden in het ziekenhuis geweest? En hoe vaak?

16  
17  
18  
19  
20

11.15 Bent u in de afgelopen 3 maanden overdag in het ziekenhuis geweest voor een behandeling? (U bleef dus niet slapen. U kwam bijvoorbeeld voor een bloedtransfusie, nierdialyse of chemokuur)

Ja  
 Nee

21  
22  
23  
24  
25  
26  
27  
28

11.15.1 **If 'Bent u in de afgelopen 3 maanden overdag in het ziekenhuis geweest voor een behandeling? (U bleef dus niet slapen. U kwam bijvoorbeeld voor een bloedtransfusie, nierdialyse of chemokuur)' is equal to 'Ja' answer this question:**  
Voor welke soort behandeling was dit?

29  
30  
31  
32  
33  
34  
35  
36

11.15.2 **If 'Bent u in de afgelopen 3 maanden overdag in het ziekenhuis geweest voor een behandeling? (U bleef dus niet slapen. U kwam bijvoorbeeld voor een bloedtransfusie, nierdialyse of chemokuur)' is equal to 'Ja' answer this question:**  
Hoeveel keer moest u in de afgelopen 3 maanden voor deze behandelingen naar het ziekenhuis?

37  
38  
39  
40  
41  
42  
43  
44

11.16 Bent u in de afgelopen 3 maanden ergens anders geweest voor een behandeling overdag? (U bleef dus niet slapen. U ging bijvoorbeeld naar de dagopvang van een woon-/zorgcentrum of een psychiatrische instelling. Of naar de dagbehandeling van een revalidatiecentrum)

Ja  
 Nee

45  
46  
47  
48  
49  
50  
51  
52  
53

11.16.1 **If 'Bent u in de afgelopen 3 maanden ergens anders geweest voor een behandeling overdag? (U bleef dus niet slapen. U ging bijvoorbeeld naar de dagopvang van een woon-/zorgcentrum of een psychiatrische instelling. Of naar de dagbehandeling van een revalidatiecentrum)' is equal to 'Ja' answer this question:**  
Wat voor instelling was dit?

Woon-/zorgcentrum  
 Revalidatiecentrum  
 Psychiatrische instelling  
 Een andere instelling, namelijk

54  
55  
56  
57  
58  
59  
60

11.16.1.1 **If 'Wat voor instelling was dit?' is equal to 'Een andere instelling, namelijk' answer this question:**  
Wat voor instelling was dit?

1  
2  
3  
4  
5  
6  
7  
8  
9  
10  
11  
12  
13  
14  
15  
16  
17  
18  
19  
20  
21  
22  
23  
24  
25  
26  
27  
28  
29  
30  
31  
32  
33  
34  
35  
36  
37  
38  
39  
40  
41  
42  
43  
44  
45  
46  
47  
48  
49  
50  
51  
52  
53  
54  
55  
56  
57  
58  
59  
60

|           |                                                                                                                                                                                                                                                                                                 |                                                                                                                                                                                                             |
|-----------|-------------------------------------------------------------------------------------------------------------------------------------------------------------------------------------------------------------------------------------------------------------------------------------------------|-------------------------------------------------------------------------------------------------------------------------------------------------------------------------------------------------------------|
| 11.16.1.2 | <b>If 'Wat voor instelling was dit?' is equal to 'Woon-/zorgcentrum' answer this question:</b><br>Hoe vaak moest u hier in de afgelopen 3 maanden naartoe? Naar het woon-/zorgcentrum:                                                                                                          | <input type="text"/> keer in de afgelopen 3 maanden                                                                                                                                                         |
| 11.16.1.3 | <b>If 'Wat voor instelling was dit?' is equal to 'Revalidatiecentrum' answer this question:</b><br>Hoe vaak moest u hier in de afgelopen 3 maanden naartoe? Naar het revalidatiecentrum:                                                                                                        | <input type="text"/> keer in de afgelopen 3 maanden                                                                                                                                                         |
| 11.16.1.4 | <b>If 'Wat voor instelling was dit?' is equal to 'Psychiatrische instelling' answer this question:</b><br>Hoe vaak moest u hier in de afgelopen 3 maanden naartoe? Naar de psychiatrische instelling:                                                                                           | <input type="text"/> keer in de afgelopen 3 maanden                                                                                                                                                         |
| 11.16.1.5 | <b>If 'Wat voor instelling was dit?' is equal to 'Een andere instelling, namelijk' answer this question:</b><br>Hoe vaak moest u hier in de afgelopen 3 maanden naartoe? Naar de andere instelling:                                                                                             | <input type="text"/> keer in de afgelopen 3 maanden                                                                                                                                                         |
| 11.17     | Heeft u in de afgelopen 3 maanden weleens in het ziekenhuis gelegen? (U moest dus blijven slapen. Bijvoorbeeld omdat u geopereerd was en niet meteen naar huis kon)                                                                                                                             | <input type="radio"/> Ja<br><input type="radio"/> Nee                                                                                                                                                       |
| 11.17.1   | <b>If 'Heeft u in de afgelopen 3 maanden weleens in het ziekenhuis gelegen? (U moest dus blijven slapen. Bijvoorbeeld omdat u geopereerd was en niet meteen naar huis kon)' is equal to 'Ja' answer this question:</b><br>Hoe vaak heeft u in de afgelopen 3 maanden in het ziekenhuis gelegen? | <input type="text"/> keer in de afgelopen 3 maanden                                                                                                                                                         |
| 11.17.2   | <b>If 'Heeft u in de afgelopen 3 maanden weleens in het ziekenhuis gelegen? (U moest dus blijven slapen. Bijvoorbeeld omdat u geopereerd was en niet meteen naar huis kon)' is equal to 'Ja' answer this question:</b><br>Hoe lang heeft u in het ziekenhuis gelegen?                           | <input type="text"/> dagen in de afgelopen 3 maanden                                                                                                                                                        |
| 11.18     | Moest u in de afgelopen 3 maanden ergens anders blijven slapen voor uw gezondheid? (Bijvoorbeeld in een woon-/zorgcentrum, psychiatrische instelling of revalidatiecentrum)                                                                                                                     | <input type="radio"/> Ja<br><input type="radio"/> Nee                                                                                                                                                       |
| 11.18.1   | <b>If 'Moest u in de afgelopen 3 maanden ergens anders blijven slapen voor uw gezondheid? (Bijvoorbeeld in een woon-/zorgcentrum, psychiatrische instelling of revalidatiecentrum)' is equal to 'Ja' answer this question:</b><br>Wat voor instelling was dit?                                  | <input type="checkbox"/> Woon-/zorgcentrum<br><input type="checkbox"/> Revalidatiecentrum<br><input type="checkbox"/> Psychiatrische instelling<br><input type="checkbox"/> Een andere instelling, namelijk |



- 1  
2  
3  
4  
5  
6  
7
- 11.18.1.1 **If 'Wat voor instelling was dit?' is equal to 'Een andere instelling, namelijk' answer this question:**  
Een andere instelling, namelijk
- 11.18.1.2 **If 'Wat voor instelling was dit?' is equal to 'Woon-/zorgcentrum' answer this question:**  
Hoe lang bent u in deze instelling geweest? In het woon-/zorgcentrum:
- 11.18.1.3 **If 'Wat voor instelling was dit?' is equal to 'Revalidatiecentrum' answer this question:**  
Hoe lang bent u in deze instelling geweest? In het revalidatiecentrum:
- 11.18.1.4 **If 'Wat voor instelling was dit?' is equal to 'Psychiatrische instelling' answer this question:**  
Hoe lang bent u in deze instelling geweest? In de psychiatrische instelling:
- 11.18.1.5 **If 'Wat voor instelling was dit?' is equal to 'Een andere instelling, namelijk' answer this question:**  
Hoe lang bent u in deze instelling geweest? In de andere instelling:
- 11.19 Heeft u in de afgelopen 3 maanden hulp gekregen van een familielid of een bekende vanwege uw lichamelijke of psychische problemen?
- 11.19.1 **If 'Heeft u in de afgelopen 3 maanden hulp gekregen van een familielid of een bekende vanwege uw lichamelijke of psychische problemen?' is equal to 'Ja' answer this question:**  
Wat voor hulp van familieleden of bekenden heeft u gehad in de afgelopen 3 maanden?
- 11.19.1.1 **If 'Wat voor hulp van familieleden of bekenden heeft u gehad in de afgelopen 3 maanden?' is equal to 'Huishoudelijke hulp - voorbeeld: stofzuigen, bed opmaken, boodschappen doen, klaarmaken van eten en drinken, verzorgen van kinderen' answer this question:**  
Hoeveel weken heeft u deze hulp gehad?  
Huishoudelijke hulp:

1  
2  
3  
4  
5  
6  
7  
8  
9

11.19.1.2 **If 'Wat voor hulp van familieleden of bekenden heeft u gehad in de afgelopen 3 maanden?' is equal to 'Verzorging van uzelf - voorbeeld: hulp bij douchen of aankleden, hulp bij het eten en drinken of het geven van medicijnen' answer this question:**  
Hoeveel weken heeft u deze hulp gehad? Verzorging van uzelf:

weken in de afgelopen 3 maanden

10  
11  
12  
13  
14  
15  
16  
17  
18  
19  
20  
21

11.19.1.3 **If 'Wat voor hulp van familieleden of bekenden heeft u gehad in de afgelopen 3 maanden?' is equal to 'Praktische hulp - voorbeeld: ondersteuning bij wandelen, het maken van uitstapjes of bezoeken aan bekenden, bezoeken aan de huisarts of het ziekenhuis, het regelen van hulp of het regelen van financiële zaken' answer this question:**  
Hoeveel uur hulp kreeg u in deze weken gemiddeld?  
Praktische hulp:

weken in de afgelopen 3 maanden

22  
23  
24  
25  
26  
27  
28  
29  
30  
31

11.19.1.4 **If 'Wat voor hulp van familieleden of bekenden heeft u gehad in de afgelopen 3 maanden?' is equal to 'Huishoudelijke hulp - voorbeeld: stofzuigen, bed opmaken, boodschappen doen, klaarmaken van eten en drinken, verzorgen van kinderen' answer this question:**  
Hoeveel uur hulp kreeg u in deze weken gemiddeld?  
Huishoudelijke hulp: gemiddeld

uur in de week

32  
33  
34  
35  
36  
37  
38  
39

11.19.1.5 **If 'Wat voor hulp van familieleden of bekenden heeft u gehad in de afgelopen 3 maanden?' is equal to 'Verzorging van uzelf - voorbeeld: hulp bij douchen of aankleden, hulp bij het eten en drinken of het geven van medicijnen' answer this question:**  
Hoeveel uur hulp kreeg u in deze weken gemiddeld?  
Verzorging van uzelf: gemiddeld

uur in de week

40  
41  
42  
43  
44  
45  
46  
47  
48  
49  
50  
51  
52  
53  
54  
55

11.19.1.6 **If 'Wat voor hulp van familieleden of bekenden heeft u gehad in de afgelopen 3 maanden?' is equal to 'Praktische hulp - voorbeeld: ondersteuning bij wandelen, het maken van uitstapjes of bezoeken aan bekenden, bezoeken aan de huisarts of het ziekenhuis, het regelen van hulp of het regelen van financiële zaken' answer this question:**  
Hoeveel uur hulp kreeg u in deze weken gemiddeld?  
Praktische hulp: gemiddeld

uur in de week

## Vragenlijst PRIMA studie - Dank

| Number | Question | Answers |
|--------|----------|---------|
|--------|----------|---------|

12.1 Hartelijk dank voor de tijd die u heeft genomen om de vragenlijsten in te vullen. Indien u nog opmerkingen heeft kunt u deze hierin plaatsen.

## Survey 'Vragenlijst PRIMA studie 12 weken'

### Vragenlijst PRIMA studie 12 weken - AOFAS - Pijn

| Number | Question                            | Answers                                                                                                                                                                                                         |
|--------|-------------------------------------|-----------------------------------------------------------------------------------------------------------------------------------------------------------------------------------------------------------------|
| 1.1    | Hoeveel pijn ervaart u aan uw voet? | <input type="checkbox"/> Geen<br><input type="checkbox"/> Milde pijnklachten of af en toe pijn<br><input type="checkbox"/> Matige pijnklachten, dagelijks<br><input type="checkbox"/> Vrijwel continu erge pijn |

### Vragenlijst PRIMA studie 12 weken - AOFAS resterende gedeelte

| Number | Question                                              | Answers                                                                                                                                                                                                                                                                                                                                                                                                                                              |
|--------|-------------------------------------------------------|------------------------------------------------------------------------------------------------------------------------------------------------------------------------------------------------------------------------------------------------------------------------------------------------------------------------------------------------------------------------------------------------------------------------------------------------------|
| 2.1    | Hoeveel beperkingen in het dagelijks leven ervaart u? | <input type="radio"/> Geen beperkingen, geen hulpmiddelen nodig<br><input type="radio"/> Geen beperkingen in algemeen dagelijkse bezigheden, wel beperkingen in recreatieve activiteiten (sport, hobbies, etc) geen ondersteuning<br><input type="radio"/> Beperkingen bij dagelijkse- en recreatieve activiteiten, stok<br><input type="radio"/> Ernstige beperkingen bij dagelijkse- en recreatieve activiteiten, walker, krukken, rolstoel, brace |
| 2.2    | Wat is de afstand die u in één keer kunt lopen?       | <input type="radio"/> Meer dan 600 meter<br><input type="radio"/> 400 - 600 meter<br><input type="radio"/> 100 - 300 meter<br><input type="radio"/> Minder dan 100 meter                                                                                                                                                                                                                                                                             |

|     |                                                                                                                            |                                                                                                                                                                                                                                                                                                             |
|-----|----------------------------------------------------------------------------------------------------------------------------|-------------------------------------------------------------------------------------------------------------------------------------------------------------------------------------------------------------------------------------------------------------------------------------------------------------|
| 2.3 | Heeft u moeite met lopen op een bepaalde ondergrond?                                                                       | <input type="radio"/> Geen problemen bij lopen<br><input type="radio"/> Enig problemen op ongelijke ondergrond, trap, helling, ladders<br><input type="radio"/> Ernstige problemen bij ongelijke ondergrond, trap, helling, ladders                                                                         |
| 2.4 | Hoe zou u uw looppatroon beoordelen?                                                                                       | <input type="radio"/> Normaal of minimaal afwijkend<br><input type="radio"/> Duidelijk<br><input type="radio"/> Ernstig                                                                                                                                                                                     |
| 2.5 | Hoe zou u de beweeglijkheid van uw voet beoordelen ten opzichte van de andere zijde of ten opzichte van vóór het ongeval?  | <input type="radio"/> Hetzelfde of licht beperkt t.o.v. de niet aangedane zijde of zoals voor het ongeval<br><input type="radio"/> Ongeveer de helft beperkt<br><input type="radio"/> Sterk verminderd, bijna geen bewegingen mogelijk                                                                      |
| 2.6 | Hoe zou u de beweeglijkheid van uw enkel beoordelen ten opzichte van de andere zijde of ten opzichte van voor het ongeval? | <input type="radio"/> Hetzelfde of licht beperkt t.o.v. de niet aangedane zijde of zoals voor het ongeval<br><input type="radio"/> Ongeveer de helft beperkt<br><input type="radio"/> Sterk verminderd, bijna geen bewegingen mogelijk                                                                      |
| 2.7 | Hoe zou u de stabiliteit van uw voet en enkel beoordelen                                                                   | <input type="radio"/> Stabiel, ik verzvik mijn enkel hooguit incidenteel<br><input type="radio"/> Niet stabiel, ik verzvik mijn enkel vaak                                                                                                                                                                  |
| 2.8 | Hoe zou u de stand van uw voet beoordelen ten opzichte van de andere zijde of ten opzichte van voor het ongeval?           | <input type="radio"/> Goed, ik kan mijn voet goed plat op de grond zetten, waarbij de stand niet afwijkend is<br><input type="radio"/> Ik sta vrijwel alleen op de buitenzijde van mijn voet<br><input type="radio"/> Ik kan mijn voet niet plat op de grond zetten en loop vrijwel alleen op mijn voorvoet |

## Vragenlijst PRIMA studie 12 weken - VAS Pain score

| Number | Question                                                                                                                                                             | Answers             |
|--------|----------------------------------------------------------------------------------------------------------------------------------------------------------------------|---------------------|
| 3.1    | VAS pijnscore (Geef uw minimaal pijnscore aan tijdens dagelijkse activiteiten op een schaal van 0 tot 100, waarbij 0 geen pijn is en 100 de ergste pijn denkbaar is) | (0.00) 100 (100.00) |

1  
2  
3  
4  
5  
6  
7  
8  
9  
10  
11  
12  
13  
14  
15  
16  
17  
18  
19  
20  
21  
22  
23  
24  
25  
26  
27  
28  
29  
30  
31  
32  
33  
34  
35  
36  
37  
38  
39  
40  
41  
42  
43  
44  
45  
46  
47  
48  
49  
50  
51  
52  
53  
54  
55  
56  
57  
58  
59  
60

## Vragenlijst PRIMA studie 12 weken - AAS

| Number | Question | Answers |
|--------|----------|---------|
|--------|----------|---------|

---

- 1  
2  
3  
4  
5  
6  
7  
8  
9  
10  
11  
12  
13  
14  
15  
16  
17  
18  
19  
20  
21  
22  
23  
24  
25  
26  
27  
28  
29  
30  
31  
32  
33  
34  
35  
36  
37  
38  
39  
40  
41  
42  
43  
44  
45  
46  
47  
48  
49  
50  
51  
52  
53  
54  
55  
56  
57  
58  
59  
60
- 4.1 Wat is het meest bij u van toepassing ten aanzien van uw activiteit?
- American Football
  - Basketbal
  - Gymnastiek/turnen
  - Handbal
  - Rugby
  - Voetbal
  - Hockey
  - Korfbal
  - Gevechtssporten: judo, karate, kung fu, taekwando, jiu jitsu, etc.
  - Oriëntatiewandelen
  - Rhythmische gymnastiek
  - Volleybal
  - Boxen
  - Freestyle snowboarden
  - IJshockey
  - Tennis
  - Worstelen
  - Fitness, aerobics
  - Badminton
  - Baseball
  - Cross-country hardlopen
  - Moderne pentathlon
  - Squash
  - Surfen, windsurfen
  - Tafel tennis
  - Atletiek: spring-, werponderdelen
  - Waterskiën
  - Dans
  - Schermen
  - Zaalhockey
  - Bergbeklimmen
  - Langlauf
  - Parachute springen
  - Softball
  - Speciale beroepen en werkactiviteiten; speciale beroepen: ballet, professioneel soldaat, speciale reddingswerker, stuntman, etc.
  - Duiken
  - Scubaduiken
  - Skaten, in-line skaten
  - Atletiek: looponderdelen
  - Triatlon
  - Gewichtsheffen, body-building

1  
2  
3  
4  
5  
6  
7  
8  
9  
10  
11  
12  
13  
14  
15  
16  
17  
18  
19  
20  
21  
22  
23  
24  
25  
26  
27  
28  
29  
30  
31  
32  
33  
34  
35  
36  
37  
38  
39  
40  
41  
42  
43  
44  
45  
46  
47  
48  
49  
50  
51  
52  
53  
54  
55  
56  
57  
58  
59  
60

- Alle competitieve sporten hieronder met 'seasonal' conditioning
- Zwaar fysiek werk
- Alpine skiën en snowboarden
- Bowlen/curlen
- Golf
- Mountainbike/BMX
- Powerliften
- Zeilen
- Fysiek werk
- Wielrennen
- Paardrijden
- Motorsporten/technische sporten
- Roeien, kayakken
- Boogschieten
- Water polo en zwemmen
- Kunnen lopen op oneven grond
- Geen sport, echter geen limitatie in dagelijkse activiteiten
- Kunnen lopen op even grond, maar de dagelijkse activiteiten zijn gelimiteerd
- Niet kunnen lopen, fysieke handicap wegens enkelproblemen

|       |                                                                                                                                                                    |                                                                                                              |
|-------|--------------------------------------------------------------------------------------------------------------------------------------------------------------------|--------------------------------------------------------------------------------------------------------------|
| 4.1.1 | <b><i>If 'Wat is het meest bij u van toepassing ten aanzien van uw acitviteit?' is equal to 'American Football' answer this question:</i></b><br>American Football | <input type="radio"/> Professioneel<br><input type="radio"/> Competitief<br><input type="radio"/> Recreatief |
| 4.1.2 | <b><i>If 'Wat is het meest bij u van toepassing ten aanzien van uw acitviteit?' is equal to 'Basketbal' answer this question:</i></b><br>Basketbal                 | <input type="radio"/> Professioneel<br><input type="radio"/> Competitief<br><input type="radio"/> Recreatief |
| 4.1.3 | <b><i>If 'Wat is het meest bij u van toepassing ten aanzien van uw acitviteit?' is equal to 'Gymnastiek/turnen' answer this question:</i></b><br>Gymnastiek/turnen | <input type="radio"/> Professioneel<br><input type="radio"/> Competitief<br><input type="radio"/> Recreatief |
| 4.1.4 | <b><i>If 'Wat is het meest bij u van toepassing ten aanzien van uw acitviteit?' is equal to 'Handbal' answer this question:</i></b><br>Handbal                     | <input type="radio"/> Professioneel<br><input type="radio"/> Competitief<br><input type="radio"/> Recreatief |
| 4.1.5 | <b><i>If 'Wat is het meest bij u van toepassing ten aanzien van uw acitviteit?' is equal to 'Rugby' answer this question:</i></b><br>Rugby                         | <input type="radio"/> Professioneel<br><input type="radio"/> Competitief<br><input type="radio"/> Recreatief |

|    |        |                                                                                                                                                                                          |                                     |
|----|--------|------------------------------------------------------------------------------------------------------------------------------------------------------------------------------------------|-------------------------------------|
| 1  |        |                                                                                                                                                                                          |                                     |
| 2  | 4.1.6  | <b>If 'Wat is het meest bij u van toepassing ten aanzien van uw acitiviteit?' is equal to 'Voetbal' answer this question:</b>                                                            | <input type="radio"/> Professioneel |
| 3  |        |                                                                                                                                                                                          | <input type="radio"/> Competitief   |
| 4  |        |                                                                                                                                                                                          | <input type="radio"/> Recreatief    |
| 5  |        | Voetbal                                                                                                                                                                                  |                                     |
| 6  |        |                                                                                                                                                                                          |                                     |
| 7  |        |                                                                                                                                                                                          |                                     |
| 8  | 4.1.7  | <b>If 'Wat is het meest bij u van toepassing ten aanzien van uw acitiviteit?' is equal to 'Hockey' answer this question:</b>                                                             | <input type="radio"/> Professioneel |
| 9  |        |                                                                                                                                                                                          | <input type="radio"/> Competitief   |
| 10 |        |                                                                                                                                                                                          | <input type="radio"/> Recreatief    |
| 11 |        | Hockey                                                                                                                                                                                   |                                     |
| 12 |        |                                                                                                                                                                                          |                                     |
| 13 |        |                                                                                                                                                                                          |                                     |
| 14 | 4.1.8  | <b>If 'Wat is het meest bij u van toepassing ten aanzien van uw acitiviteit?' is equal to 'Korfbal' answer this question:</b>                                                            | <input type="radio"/> Professioneel |
| 15 |        |                                                                                                                                                                                          | <input type="radio"/> Competitief   |
| 16 |        |                                                                                                                                                                                          | <input type="radio"/> Recreatief    |
| 17 |        | Korfbal                                                                                                                                                                                  |                                     |
| 18 |        |                                                                                                                                                                                          |                                     |
| 19 |        |                                                                                                                                                                                          |                                     |
| 20 | 4.1.9  | <b>If 'Wat is het meest bij u van toepassing ten aanzien van uw acitiviteit?' is equal to 'Gevechtssporten: judo, karate, kung fu, taekwando, jiu jitsu, etc.' answer this question:</b> | <input type="radio"/> Professioneel |
| 21 |        |                                                                                                                                                                                          | <input type="radio"/> Competitief   |
| 22 |        |                                                                                                                                                                                          | <input type="radio"/> Recreatief    |
| 23 |        | Gevechtssporten: judo, karate, kung fu, taekwando, jiu                                                                                                                                   |                                     |
| 24 |        | jitsu, etc.                                                                                                                                                                              |                                     |
| 25 |        |                                                                                                                                                                                          |                                     |
| 26 |        |                                                                                                                                                                                          |                                     |
| 27 | 4.1.10 | <b>If 'Wat is het meest bij u van toepassing ten aanzien van uw acitiviteit?' is equal to 'Oriëntatielopen' answer this question:</b>                                                    | <input type="radio"/> Professioneel |
| 28 |        |                                                                                                                                                                                          | <input type="radio"/> Competitief   |
| 29 |        |                                                                                                                                                                                          | <input type="radio"/> Recreatief    |
| 30 |        | Oriëntatielopen                                                                                                                                                                          |                                     |
| 31 |        |                                                                                                                                                                                          |                                     |
| 32 |        |                                                                                                                                                                                          |                                     |
| 33 | 4.1.11 | <b>If 'Wat is het meest bij u van toepassing ten aanzien van uw acitiviteit?' is equal to 'Rhythmische gymnastiek' answer this question:</b>                                             | <input type="radio"/> Professioneel |
| 34 |        |                                                                                                                                                                                          | <input type="radio"/> Competitief   |
| 35 |        |                                                                                                                                                                                          | <input type="radio"/> Recreatief    |
| 36 |        | Rhythmisch gymnastiek                                                                                                                                                                    |                                     |
| 37 |        |                                                                                                                                                                                          |                                     |
| 38 |        |                                                                                                                                                                                          |                                     |
| 39 | 4.1.12 | <b>If 'Wat is het meest bij u van toepassing ten aanzien van uw acitiviteit?' is equal to 'Volleybal' answer this question:</b>                                                          | <input type="radio"/> Professioneel |
| 40 |        |                                                                                                                                                                                          | <input type="radio"/> Competitief   |
| 41 |        |                                                                                                                                                                                          | <input type="radio"/> Recreatief    |
| 42 |        | Volleybal                                                                                                                                                                                |                                     |
| 43 |        |                                                                                                                                                                                          |                                     |
| 44 | 4.1.13 | <b>If 'Wat is het meest bij u van toepassing ten aanzien van uw acitiviteit?' is equal to 'Boxen' answer this question:</b>                                                              | <input type="radio"/> Professioneel |
| 45 |        |                                                                                                                                                                                          | <input type="radio"/> Competitief   |
| 46 |        |                                                                                                                                                                                          | <input type="radio"/> Recreatief    |
| 47 |        | Boxen                                                                                                                                                                                    |                                     |
| 48 |        |                                                                                                                                                                                          |                                     |
| 49 |        |                                                                                                                                                                                          |                                     |
| 50 | 4.1.14 | <b>If 'Wat is het meest bij u van toepassing ten aanzien van uw acitiviteit?' is equal to 'Freestyle snowboarden' answer this question:</b>                                              | <input type="radio"/> Professioneel |
| 51 |        |                                                                                                                                                                                          | <input type="radio"/> Competitief   |
| 52 |        |                                                                                                                                                                                          | <input type="radio"/> Recreatief    |
| 53 |        | Freestyle snowboarden                                                                                                                                                                    |                                     |
| 54 |        |                                                                                                                                                                                          |                                     |
| 55 |        |                                                                                                                                                                                          |                                     |
| 56 | 4.1.15 | <b>If 'Wat is het meest bij u van toepassing ten aanzien van uw acitiviteit?' is equal to 'Freestyle snowboarden' answer this question:</b>                                              | <input type="radio"/> Professioneel |
| 57 |        |                                                                                                                                                                                          | <input type="radio"/> Competitief   |
| 58 |        |                                                                                                                                                                                          | <input type="radio"/> Recreatief    |
| 59 |        | IJshockey                                                                                                                                                                                |                                     |
| 60 |        |                                                                                                                                                                                          |                                     |



- 1  
2  
3  
4  
5  
6  
7
- 4.1.16 ***If 'Wat is het meest bij u van toepassing ten aanzien van uw acitiviteit?' is equal to 'Tennis' answer this question:***  
Tennis  Professioneel  
 Competitief  
 Recreatief
- 
- 8  
9  
10  
11  
12
- 4.1.17 ***If 'Wat is het meest bij u van toepassing ten aanzien van uw acitiviteit?' is equal to 'Worstelen' answer this question:***  
Worstelen  Professioneel  
 Competitief  
 Recreatief
- 
- 13  
14  
15  
16  
17  
18
- 4.1.18 ***If 'Wat is het meest bij u van toepassing ten aanzien van uw acitiviteit?' is equal to 'Fitness, aerobics' answer this question:***  
Fitness, aerobics  Professioneel  
 Competitief  
 Recreatief
- 
- 19  
20  
21  
22  
23  
24
- 4.1.19 ***If 'Wat is het meest bij u van toepassing ten aanzien van uw acitiviteit?' is equal to 'Badminton' answer this question:***  
Badminton  Professioneel  
 Competitief  
 Recreatief
- 
- 25  
26  
27  
28  
29  
30
- 4.1.20 ***If 'Wat is het meest bij u van toepassing ten aanzien van uw acitiviteit?' is equal to 'Baseball' answer this question:***  
Baseball  Professioneel  
 Competitief  
 Recreatief
- 
- 31  
32  
33  
34  
35
- 4.1.21 ***If 'Wat is het meest bij u van toepassing ten aanzien van uw acitiviteit?' is equal to 'Cross-country hardlopen' answer this question:***  
Cross-country hardlopen  Professioneel  
 Competitief  
 Recreatief
- 
- 36  
37  
38  
39  
40  
41
- 4.1.22 ***If 'Wat is het meest bij u van toepassing ten aanzien van uw acitiviteit?' is equal to 'Moderne pentathlon' answer this question:***  
Moderne pentathlon  Professioneel  
 Competitief  
 Recreatief
- 
- 42  
43  
44  
45  
46  
47
- 4.1.23 ***If 'Wat is het meest bij u van toepassing ten aanzien van uw acitiviteit?' is equal to 'Squash' answer this question:***  
Squash  Professioneel  
 Competitief  
 Recreatief
- 
- 48  
49  
50  
51  
52  
53
- 4.1.24 ***If 'Wat is het meest bij u van toepassing ten aanzien van uw acitiviteit?' is equal to 'Surfen, windsurfen' answer this question:***  
Surfen, windsurfen  Professioneel  
 Competitief  
 Recreatief
- 
- 54  
55  
56  
57  
58  
59  
60
- 4.1.25 ***If 'Wat is het meest bij u van toepassing ten aanzien van uw acitiviteit?' is equal to 'Tafel tennis' answer this question:***  
Tafel tennis  Professioneel  
 Competitief  
 Recreatief

- 1  
2  
3  
4  
5  
6  
7
- 
- 4.1.26 ***If 'Wat is het meest bij u van toepassing ten aanzien van uw acitiviteit?' is equal to 'Atletiek: spring-, werponderdelen' answer this question:***  
Atletiek: spring-, werponderdelen  Professioneel  
 Competitief  
 Recreatief
- 
- 8  
9  
10  
11  
12
- 4.1.27 ***If 'Wat is het meest bij u van toepassing ten aanzien van uw acitiviteit?' is equal to 'Waterskieën' answer this question:***  
Waterskien  Professioneel  
 Competitief  
 Recreatief
- 
- 13  
14  
15  
16  
17  
18
- 4.1.28 ***If 'Wat is het meest bij u van toepassing ten aanzien van uw acitiviteit?' is equal to 'Dans' answer this question:***  
Dans  Professioneel  
 Competitief  
 Recreatief
- 
- 19  
20  
21  
22  
23  
24
- 4.1.29 ***If 'Wat is het meest bij u van toepassing ten aanzien van uw acitiviteit?' is equal to 'Schermen' answer this question:***  
Schermen  Professioneel  
 Competitief  
 Recreatief
- 
- 25  
26  
27  
28  
29  
30
- 4.1.30 ***If 'Wat is het meest bij u van toepassing ten aanzien van uw acitiviteit?' is equal to 'Zaalhockey' answer this question:***  
Zaalhockey  Professioneel  
 Competitief  
 Recreatief
- 
- 31  
32  
33  
34  
35
- 4.1.31 ***If 'Wat is het meest bij u van toepassing ten aanzien van uw acitiviteit?' is equal to 'Bergbeklimmen' answer this question:***  
Bergbeklimmen  Professioneel  
 Competitief  
 Recreatief
- 
- 36  
37  
38  
39  
40  
41
- 4.1.32 ***If 'Wat is het meest bij u van toepassing ten aanzien van uw acitiviteit?' is equal to 'Langlauf' answer this question:***  
Langlauf  Professioneel  
 Competitief  
 Recreatief
- 
- 42  
43  
44  
45  
46  
47
- 4.1.33 ***If 'Wat is het meest bij u van toepassing ten aanzien van uw acitiviteit?' is equal to 'Parachute springen' answer this question:***  
Parachute springen  Professioneel  
 Competitief  
 Recreatief
- 
- 48  
49  
50  
51  
52  
53  
54  
55  
56  
57  
58  
59  
60
- 4.1.34 ***If 'Wat is het meest bij u van toepassing ten aanzien van uw acitiviteit?' is equal to 'Softball' answer this question:***  
Softball  Professioneel  
 Competitief  
 Recreatief

- 1  
2  
3  
4  
5  
6  
7  
8  
9  
10  
11  
12
- 4.1.35 ***If 'Wat is het meest bij u van toepassing ten aanzien van uw acitiviteit?' is equal to 'Speciale beroepen en werkactiviteiten; speciale beroepen: ballet, professioneel soldaat, speciale reddingswerker, stuntman, etc.' answer this question:***  
Speciale beroepen en werkactiviteiten speciale beroepen: ballet, professioneel soldaat, speciale reddingswerker, stuntman, etc.
- ballet, professioneel soldaat, speciale reddingswerker, stuntman, etc.
- 
- 13  
14  
15  
16  
17
- 4.1.36 ***If 'Wat is het meest bij u van toepassing ten aanzien van uw acitiviteit?' is equal to 'Duiken' answer this question:***  
Duiken
- Professioneel/competitief  
 Recreatief
- 
- 18  
19  
20  
21  
22
- 4.1.37 ***If 'Wat is het meest bij u van toepassing ten aanzien van uw acitiviteit?' is equal to 'Scubaduiken' answer this question:***  
Scubaduiken
- Professioneel/competitief  
 Recreatief
- 
- 23  
24  
25  
26  
27  
28
- 4.1.38 ***If 'Wat is het meest bij u van toepassing ten aanzien van uw acitiviteit?' is equal to 'Skaten, in-line skaten' answer this question:***  
skaten, in-linen skaten
- Professioneel/competitief  
 Recreatief
- 
- 29  
30  
31  
32  
33
- 4.1.39 ***If 'Wat is het meest bij u van toepassing ten aanzien van uw acitiviteit?' is equal to 'Atletiek: looponderdelen' answer this question:***  
Atletiek: looponderdelen
- Professioneel/competitief  
 Recreatief
- 
- 34  
35  
36  
37  
38
- 4.1.40 ***If 'Wat is het meest bij u van toepassing ten aanzien van uw acitiviteit?' is equal to 'Triatlon' answer this question:***  
triatlon
- Professioneel/competitief  
 Recreatief
- 
- 39  
40  
41  
42  
43  
44  
45
- 4.1.41 ***If 'Wat is het meest bij u van toepassing ten aanzien van uw acitiviteit?' is equal to 'Gewichtsheffen, body-building' answer this question:***  
Gewichtsheffen, body-building
- Professioneel/competitief  
 Recreatief
- 
- 46  
47  
48  
49  
50  
51  
52
- 4.1.42 ***If 'Wat is het meest bij u van toepassing ten aanzien van uw acitiviteit?' is equal to 'Alle competitieve sporten hieronder met 'seasonal' conditioning' answer this question:***  
Alle competitieve sporten hieronder met 'seasonal' conditioning
- Alle competitieve sporten hieronder met 'seasonal' conditioning
- 
- 53  
54  
55  
56  
57  
58  
59  
60
- 4.1.43 ***If 'Wat is het meest bij u van toepassing ten aanzien van uw acitiviteit?' is equal to 'Zwaar fysiek werk' answer this question:***  
Zwaar fysiek werk
- Alle competitieve sporten hieronder met 'seasonal' conditioning

- 1  
2  
3  
4  
5  
6  
7  
8  
9  
10  
11  
12  
13  
14  
15  
16  
17  
18  
19  
20  
21  
22  
23  
24  
25  
26  
27  
28  
29  
30  
31  
32  
33  
34  
35  
36  
37  
38  
39  
40  
41  
42  
43  
44  
45  
46  
47  
48  
49  
50  
51  
52  
53  
54  
55  
56  
57  
58  
59  
60
- 
- 4.1.44 ***If 'Wat is het meest bij u van toepassing ten aanzien van uw acitiviteit?' is equal to 'Alpine skiën en snowboarden' answer this question:***  
Alpine skien en snowboarden  Alpine skien en snowboarden
- 
- 4.1.45 ***If 'Wat is het meest bij u van toepassing ten aanzien van uw acitiviteit?' is equal to 'Bowlen/curlen' answer this question:***  
Bowlen/curlen  Bowlen/curlen
- 
- 4.1.46 ***If 'Wat is het meest bij u van toepassing ten aanzien van uw acitiviteit?' is equal to 'Golf' answer this question:***  
Golf  Golf
- 
- 4.1.47 ***If 'Wat is het meest bij u van toepassing ten aanzien van uw acitiviteit?' is equal to 'Mountainbike/BMX' answer this question:***  
Mountainbike/BMX  Mountainbike/BMX
- 
- 4.1.48 ***If 'Wat is het meest bij u van toepassing ten aanzien van uw acitiviteit?' is equal to 'Powerliften' answer this question:***  
Powerliften  Powerliften
- 
- 4.1.49 ***If 'Wat is het meest bij u van toepassing ten aanzien van uw acitiviteit?' is equal to 'Zeilen' answer this question:***  
Zeilen  Zeilen
- 
- 4.1.50 ***If 'Wat is het meest bij u van toepassing ten aanzien van uw acitiviteit?' is equal to 'Fysiek werk' answer this question:***  
Fysiek werk  Fysiek werk
- 
- 4.1.51 ***If 'Wat is het meest bij u van toepassing ten aanzien van uw acitiviteit?' is equal to 'Wielrennen' answer this question:***  
Wielrennen  Wielrennen
- 
- 4.1.52 ***If 'Wat is het meest bij u van toepassing ten aanzien van uw acitiviteit?' is equal to 'Paardrijden' answer this question:***  
Paardrijden  Paardrijden
- 
- 4.1.53 ***If 'Wat is het meest bij u van toepassing ten aanzien van uw acitiviteit?' is equal to 'Motorsporten/technische sporten' answer this question:***  
Motorsporten/technische sporten  Motorsporten/technische sporten
- 
- 4.1.54 ***If 'Wat is het meest bij u van toepassing ten aanzien van uw acitiviteit?' is equal to 'Roeien, kayakken' answer this question:***  
Roeien, kayakken  Roeien, kayakken

|        |                                                                                                                                                                                                                                                                                    |                                                                                                    |
|--------|------------------------------------------------------------------------------------------------------------------------------------------------------------------------------------------------------------------------------------------------------------------------------------|----------------------------------------------------------------------------------------------------|
| 4.1.55 | <b>If 'Wat is het meest bij u van toepassing ten aanzien van uw acitiviteit?' is equal to 'Boogschieten' answer this question:</b><br>Boogschieten                                                                                                                                 | <input type="radio"/> Boogschieten                                                                 |
| 4.1.56 | <b>If 'Wat is het meest bij u van toepassing ten aanzien van uw acitiviteit?' is equal to 'Water polo en zwemmen' answer this question:</b><br>Water polo en zwemmen                                                                                                               | <input type="radio"/> Water polo en zwemmen                                                        |
| 4.1.57 | <b>If 'Wat is het meest bij u van toepassing ten aanzien van uw acitiviteit?' is equal to 'Kunnen lopen op oneven grond' answer this question:</b><br>Kunnen lopen op oneven grond                                                                                                 | <input type="radio"/> Kunnen lopen op oneven grond                                                 |
| 4.1.58 | <b>If 'Wat is het meest bij u van toepassing ten aanzien van uw acitiviteit?' is equal to 'Geen sport, echter geen limitatie in dagelijkse activiteiten' answer this question:</b><br>Geen sport, echter geen limitatie in dagelijkse activiteiten                                 | <input type="radio"/> Geen sport, echter geen limitatie in dagelijkse activiteiten                 |
| 4.1.59 | <b>If 'Wat is het meest bij u van toepassing ten aanzien van uw acitiviteit?' is equal to 'Kunnen lopen op even grond, maar de dagelijkse activiteiten zijn gelimiteerd' answer this question:</b><br>Kunnen lopen op even grond, maar de dagelijkse activiteiten zijn gelimiteerd | <input type="radio"/> Kunnen lopen op even grond, maar de dagelijkse activiteiten zijn gelimiteerd |
| 4.1.60 | <b>If 'Wat is het meest bij u van toepassing ten aanzien van uw acitiviteit?' is equal to 'Niet kunnen lopen, fysieke handicap wegens enkelproblemen' answer this question:</b><br>Niet kunnen lopen, fysieke handicap wegens enkelproblemen                                       | <input type="radio"/> Niet kunnen lopen, fysieke handicap wegens enkelproblemen                    |

## Vragenlijst PRIMA studie 12 weken - Hoe tevreden bent u over de enkelklachten?

| Number | Question                                   | Answers                                                                                                                       |
|--------|--------------------------------------------|-------------------------------------------------------------------------------------------------------------------------------|
| 5.1    | Hoe tevreden bent u over de enkelklachten? | <input type="radio"/> Slecht<br><input type="radio"/> Matig<br><input type="radio"/> Goed<br><input type="radio"/> Uitstekend |

## Vragenlijst PRIMA studie 12 weken - SF-36

| Number | Question                                                                                                                                                                                                                                                                                                                                                           | Answers                                                                                                                                                                                                                                                                                   |
|--------|--------------------------------------------------------------------------------------------------------------------------------------------------------------------------------------------------------------------------------------------------------------------------------------------------------------------------------------------------------------------|-------------------------------------------------------------------------------------------------------------------------------------------------------------------------------------------------------------------------------------------------------------------------------------------|
|        | Deze vragenlijst gaat over uw standpunten t.a.v. uw gezondheid. Met behulp van deze gegevens kan worden bijgehouden hoe u zich voelt en hoe goed u in staat bent uw gebruikelijke bezigheden uit te voeren. Beantwoord elke vraag door een antwoord aan te klikken. Als u niet zeker weet hoe u een vraag moet beantwoorden, geef dan het best mogelijke antwoord. |                                                                                                                                                                                                                                                                                           |
| 6.1    | Hoe zou u over het algemeen uw gezondheid noemen?                                                                                                                                                                                                                                                                                                                  | <input type="radio"/> Uitstekend <input type="radio"/> Zeer goed <input type="radio"/> Goed <input type="radio"/> Matig <input type="radio"/> Slecht                                                                                                                                      |
| 6.2    | Hoe beoordeelt u nu uw gezondheid over het algemeen vergeleken met een jaar geleden?                                                                                                                                                                                                                                                                               | <input type="radio"/> Veel beter dan een jaar geleden <input type="radio"/> Wat beter dan een jaar geleden <input type="radio"/> Ongeveer hetzelfde als een jaar geleden <input type="radio"/> Wat slechter dan een jaar geleden <input type="radio"/> Veel slechter dan een jaar geleden |
| 6.3    | Wordt u door uw gezondheid op dit moment beperkt bij forse inspanning, zoals hardlopen, tillen van zware voorwerpen of een veeleisende sport beoefenen?                                                                                                                                                                                                            | <input type="radio"/> Ja, ernstig beperkt <input type="radio"/> Ja, een beetje beperkt <input type="radio"/> Nee, helemaal niet beperkt                                                                                                                                                   |
| 6.4    | Wordt u door uw gezondheid op dit moment beperkt bij matige inspanning zoals een tafel verplaatsen, stofzuigen, zwemmen of fietsen?                                                                                                                                                                                                                                | <input type="radio"/> Ja, ernstig beperkt <input type="radio"/> Ja, een beetje beperkt <input type="radio"/> Nee, helemaal niet beperkt                                                                                                                                                   |
| 6.5    | Wordt u door uw gezondheid op dit moment beperkt bij boodschappen tillen of dragen?                                                                                                                                                                                                                                                                                | <input type="radio"/> Ja, ernstig beperkt <input type="radio"/> Ja, een beetje beperkt <input type="radio"/> Nee, helemaal niet beperkt                                                                                                                                                   |
| 6.6    | Wordt u door uw gezondheid op dit moment beperkt bij een paar trappen oplopen?                                                                                                                                                                                                                                                                                     | <input type="radio"/> Ja, ernstig beperkt <input type="radio"/> Ja, een beetje beperkt <input type="radio"/> Nee, helemaal niet beperkt                                                                                                                                                   |
| 6.7    | Wordt u door uw gezondheid op dit moment beperkt bij één trap oplopen?                                                                                                                                                                                                                                                                                             | <input type="radio"/> Ja, ernstig beperkt <input type="radio"/> Ja, een beetje beperkt <input type="radio"/> Nee, helemaal niet beperkt                                                                                                                                                   |
| 6.8    | Wordt u door uw gezondheid op dit moment beperkt bij bukken, knielen of hurken?                                                                                                                                                                                                                                                                                    | <input type="radio"/> Ja, ernstig beperkt <input type="radio"/> Ja, een beetje beperkt <input type="radio"/> Nee, helemaal niet beperkt                                                                                                                                                   |
| 6.9    | Wordt u door uw gezondheid op dit moment beperkt bij meer dan één kilometer lopen?                                                                                                                                                                                                                                                                                 | <input type="radio"/> Ja, ernstig beperkt <input type="radio"/> Ja, een beetje beperkt <input type="radio"/> Nee, helemaal niet beperkt                                                                                                                                                   |
| 6.10   | Wordt u door uw gezondheid op dit moment beperkt bij een paar honderd meter lopen?                                                                                                                                                                                                                                                                                 | <input type="radio"/> Ja, ernstig beperkt <input type="radio"/> Ja, een beetje beperkt <input type="radio"/> Nee, helemaal niet beperkt                                                                                                                                                   |

- 1  
2  
3  
4  
5  
6  
7  
8  
9  
10  
11  
12  
13  
14  
15  
16  
17  
18  
19  
20  
21  
22  
23  
24  
25  
26  
27  
28  
29  
30  
31  
32  
33  
34  
35  
36  
37  
38  
39  
40  
41  
42  
43  
44  
45  
46  
47  
48  
49  
50  
51  
52  
53  
54  
55  
56  
57  
58  
59  
60
- 
- 6.11 Wordt u door uw gezondheid op dit moment beperkt bij ongeveer honderd meter lopen?  Ja, ernstig beperkt  Ja, een beetje beperkt  Nee, helemaal niet beperkt
- 
- 6.12 Wordt u door uw gezondheid op dit moment beperkt bij uzelf wassen of aankleden?  Ja, ernstig beperkt  Ja, een beetje beperkt  Nee, helemaal niet beperkt
- 
- 6.13 U besteedde in de afgelopen 4 weken minder tijd aan werk of andere bezigheden  Ja  Nee
- 
- 6.14 U heeft in de afgelopen 4 weken minder bereikt dan u zou willen  Ja  Nee
- 
- 6.15 U was in de afgelopen 4 weken beperkt in het soort werk of andere bezigheden.  Ja  Nee
- 
- 6.16 U had de afgelopen 4 weken moeite om uw werk of andere bezigheden uit te voeren (het kostte u bijvoorbeeld extra inspanning).  Ja  Nee
- 
- 6.17 U besteedde in de afgelopen 4 weken minder tijd aan werk of andere bezigheden ten gevolge van emotionele problemen  Ja  Nee
- 
- 6.18 U heeft in de afgelopen 4 weken minder bereikt dan u zou willen ten gevolge van emotionele problemen.  Ja  Nee
- 
- 6.19 U deed de afgelopen 4 weken uw werk of andere bezigheden niet zo zorgvuldig als gewoonlijk ten gevolge van emotionele problemen.  Ja  Nee
- 
- 6.20 In hoeverre hebben uw lichamelijke gezondheid of emotionele problemen u gedurende de afgelopen 4 weken gehinderd in uw normale omgang met familie, vrienden of burens, of bij activiteiten in groepsverband?  Helemaal niet  Enigszins  Nogal  Veel  Heel erg veel
- 
- 6.21 Hoeveel lichamelijke pijn heeft u de afgelopen 4 weken gehad?  Geen  Heel licht  Licht  Nogal  Ernstig  Heel ernstig
- 
- 6.22 In welke mate bent u de afgelopen 4 weken door de pijn gehinderd in uw normale werk (zowel werk buitenshuis als huishoudelijk werk)?  Helemaal niet  Een klein beetje  Nogal  Veel  Heel erg veel

1  
2 6.23 Voelde u zich levenslustig?  Altijd  
3  Meestal  
4  Vaak  
5  Soms  
6  Zelden  
7  Nooit  
8  
9  
10

11  
12 6.24 Was u erg zenuwachtig?  Altijd  
13  Meestal  
14  Vaak  
15  Soms  
16  Zelden  
17  Nooit  
18  
19  
20

21  
22 6.25 Zat u zo in de put dat u niets kon?  Altijd  
23  Meestal  
24  Vaak  
25  Soms  
26  Zelden  
27  Nooit  
28  
29  
30

31  
32 6.26 Voelde u zich rustig en tevreden?  Altijd  
33  Meestal  
34  Vaak  
35  Soms  
36  Zelden  
37  Nooit  
38  
39  
40

41  
42 6.27 Had u veel energie?  Altijd  
43  Meestal  
44  Vaak  
45  Soms  
46  Zelden  
47  Nooit  
48  
49  
50

51  
52 6.28 Voelde u zich somber en neerslachtig?  Altijd  
53  Meestal  
54  Vaak  
55  Soms  
56  Zelden  
57  Nooit  
58  
59  
60



1  
2  
3  
4  
5  
6  
7  
8  
9  
10  
11  
12  
13  
14  
15  
16  
17  
18  
19  
20  
21  
22  
23  
24  
25  
26  
27  
28  
29  
30  
31  
32  
33  
34  
35  
36  
37  
38  
39  
40  
41  
42  
43  
44  
45  
46  
47  
48  
49  
50  
51  
52  
53  
54  
55  
56  
57  
58  
59  
60

---

|      |                         |                                                                                                                                                                                          |
|------|-------------------------|------------------------------------------------------------------------------------------------------------------------------------------------------------------------------------------|
| 6.29 | Voelde u zich uitgeput? | <input type="radio"/> Altijd<br><input type="radio"/> Meestal<br><input type="radio"/> Vaak<br><input type="radio"/> Soms<br><input type="radio"/> Zelden<br><input type="radio"/> Nooit |
|------|-------------------------|------------------------------------------------------------------------------------------------------------------------------------------------------------------------------------------|

---

|      |                          |                                                                                                                                                                                          |
|------|--------------------------|------------------------------------------------------------------------------------------------------------------------------------------------------------------------------------------|
| 6.30 | Was u een gelukkig mens? | <input type="radio"/> Altijd<br><input type="radio"/> Meestal<br><input type="radio"/> Vaak<br><input type="radio"/> Soms<br><input type="radio"/> Zelden<br><input type="radio"/> Nooit |
|------|--------------------------|------------------------------------------------------------------------------------------------------------------------------------------------------------------------------------------|

---

|      |                    |                                                                                                                                                                                          |
|------|--------------------|------------------------------------------------------------------------------------------------------------------------------------------------------------------------------------------|
| 6.31 | Voelde u zich moe? | <input type="radio"/> Altijd<br><input type="radio"/> Meestal<br><input type="radio"/> Vaak<br><input type="radio"/> Soms<br><input type="radio"/> Zelden<br><input type="radio"/> Nooit |
|------|--------------------|------------------------------------------------------------------------------------------------------------------------------------------------------------------------------------------|

---

|      |                                                                                                                                                                                      |                                                                                                                                                            |
|------|--------------------------------------------------------------------------------------------------------------------------------------------------------------------------------------|------------------------------------------------------------------------------------------------------------------------------------------------------------|
| 6.32 | Hoe vaak hebben uw lichamelijke gezondheid of emotionele problemen u gedurende de afgelopen 4 weken gehinderd bij uw sociale activiteiten (zoals vrienden of familie bezoeken etc.)? | <input type="radio"/> Altijd<br><input type="radio"/> Meestal<br><input type="radio"/> Soms<br><input type="radio"/> Zelden<br><input type="radio"/> Nooit |
|------|--------------------------------------------------------------------------------------------------------------------------------------------------------------------------------------|------------------------------------------------------------------------------------------------------------------------------------------------------------|

---

|      |                                                            |                                                                                                                                                                                                              |
|------|------------------------------------------------------------|--------------------------------------------------------------------------------------------------------------------------------------------------------------------------------------------------------------|
| 6.33 | Ik lijk wat gemakkelijker ziek te worden dan andere mensen | <input type="radio"/> Volkomen juist<br><input type="radio"/> Grotendeels juist<br><input type="radio"/> Weet ik niet<br><input type="radio"/> Grotendeels onjuist<br><input type="radio"/> Volkomen onjuist |
|------|------------------------------------------------------------|--------------------------------------------------------------------------------------------------------------------------------------------------------------------------------------------------------------|

---

|      |                                                 |                                                                                                                                                                                                              |
|------|-------------------------------------------------|--------------------------------------------------------------------------------------------------------------------------------------------------------------------------------------------------------------|
| 6.34 | Ik ben even gezond als andere mensen die ik ken | <input type="radio"/> Volkomen juist<br><input type="radio"/> Grotendeels juist<br><input type="radio"/> Weet ik niet<br><input type="radio"/> Grotendeels onjuist<br><input type="radio"/> Volkomen onjuist |
|------|-------------------------------------------------|--------------------------------------------------------------------------------------------------------------------------------------------------------------------------------------------------------------|

- 1  
2  
3  
4  
5  
6  
7  
8  
9
- 
- 6.35 Ik verwacht dat mijn gezondheid achteruit zal gaan
- Volkomen juist
  - Grotendeels juist
  - Weet ik niet
  - Grotendeels onjuist
  - Volkomen onjuist
- 

- 10  
11  
12  
13  
14  
15  
16  
17  
18  
19  
20  
21  
22
- 6.36 Mijn gezondheid is uitstekend
- Volkomen juist
  - Grotendeels juist
  - Weet ik niet
  - Grotendeels onjuist
  - Volkomen onjuist

## Vragenlijst PRIMA studie 12 weken - GAS

| Number | Question                                                                                                                                                                                  | Answers                                                                                                                                                                                                                                                                                                                                                              |
|--------|-------------------------------------------------------------------------------------------------------------------------------------------------------------------------------------------|----------------------------------------------------------------------------------------------------------------------------------------------------------------------------------------------------------------------------------------------------------------------------------------------------------------------------------------------------------------------|
|        | Tijdens de eerste afspraak werd een duidelijk doel met u afgesproken. Dit werd tevens per email naar u gestuurd. Hoe is de situatie nu ten aanzien van de destijds gestelde doelstelling? |                                                                                                                                                                                                                                                                                                                                                                      |
| 7.1    | Wat is nu de situatie ten aanzien van het tijdens de eerste afspraak afgesproken doelstelling (Goal attainment Scaling)?                                                                  | <ul style="list-style-type: none"> <li><input type="radio"/> Achteruitgang (minder dan de uitgangssituatie)</li> <li><input type="radio"/> Uitgangssituatie</li> <li><input type="radio"/> Minder dan het doel</li> <li><input type="radio"/> Doel</li> <li><input type="radio"/> Meer dan het doel</li> <li><input type="radio"/> Veel meer dan het doel</li> </ul> |

## Vragenlijst PRIMA studie 12 weken - EQ-5D-3L

| Number | Question                                                                                                                                                                                                                                                                                                                                                           | Answers                                                                                                                                                                                                                  |
|--------|--------------------------------------------------------------------------------------------------------------------------------------------------------------------------------------------------------------------------------------------------------------------------------------------------------------------------------------------------------------------|--------------------------------------------------------------------------------------------------------------------------------------------------------------------------------------------------------------------------|
|        | Deze vragenlijst gaat over uw standpunten t.a.v. uw gezondheid. Met behulp van deze gegevens kan worden bijgehouden hoe u zich voelt en hoe goed u in staat bent uw gebruikelijke bezigheden uit te voeren. Beantwoord elke vraag door een antwoord aan te klikken. Als u niet zeker weet hoe u een vraag moet beantwoorden, geef dan het best mogelijke antwoord. |                                                                                                                                                                                                                          |
| 8.1    | Hoe is het met uw Mobiliteit gesteld?                                                                                                                                                                                                                                                                                                                              | <ul style="list-style-type: none"> <li><input type="radio"/> Ik heb geen problemen met lopen</li> <li><input type="radio"/> Ik heb enige problemen met lopen</li> <li><input type="radio"/> Ik ben bedlegerig</li> </ul> |

|                                                                                                                                                                                                                                     |                                                                                                                  |                                                                                                                                                                                                                                                             |
|-------------------------------------------------------------------------------------------------------------------------------------------------------------------------------------------------------------------------------------|------------------------------------------------------------------------------------------------------------------|-------------------------------------------------------------------------------------------------------------------------------------------------------------------------------------------------------------------------------------------------------------|
| 8.2                                                                                                                                                                                                                                 | Hoe is het met uw Zelfzorg gesteld?                                                                              | <input type="radio"/> Ik heb geen problemen om mijzelf te wassen of aan te kleden<br><input type="radio"/> Ik heb enige problemen om mijzelf te wassen of aan te kleden<br><input type="radio"/> Ik ben niet in staat om mijzelf te wassen of aan te kleden |
| 8.3                                                                                                                                                                                                                                 | Hoe is het met de Dagelijkse activiteiten (werk, studie, huishouden, gezins- en vrijetijdsactiviteiten) gesteld? | <input type="radio"/> Ik heb geen problemen met mijn dagelijkse activiteiten<br><input type="radio"/> Ik heb enige problemen met mijn dagelijkse activiteiten<br><input type="radio"/> Ik ben niet in staat om mijn dagelijkse activiteiten uit te voeren   |
| 8.4                                                                                                                                                                                                                                 | Hoe is het met de Pijn/klachten gesteld?                                                                         | <input type="radio"/> Ik heb geen pijn of andere klachten<br><input type="radio"/> Ik heb matige pijn of andere klachten<br><input type="radio"/> Ik heb zeer ernstige pijn of andere klachten                                                              |
| 8.5                                                                                                                                                                                                                                 | Hoe is het met de Stemming gesteld?                                                                              | <input type="radio"/> Ik ben niet angstig of somber<br><input type="radio"/> Ik ben matig angstig of somber<br><input type="radio"/> Ik ben erg angstig of somber                                                                                           |
| We willen weten hoe goed of slecht uw gezondheid VANDAAG is. Deze meetschaal loopt van 0 tot 100: 100 staat voor de BESTE gezondheid die u zich kunt voorstellen - 0 staat voor de SLECHTSTE gezondheid die u zich kunt voorstellen |                                                                                                                  |                                                                                                                                                                                                                                                             |
| 8.6                                                                                                                                                                                                                                 | Uw Gezondheid vandaag                                                                                            | (0.00) (100.00)                                                                                                                                                                                                                                             |

## Vragenlijst PRIMA studie 12 weken - AOS

| Number                                                                                                                                                                                                                                                                                                                                                                                                               | Question                                                   | Answers                                                                                            |
|----------------------------------------------------------------------------------------------------------------------------------------------------------------------------------------------------------------------------------------------------------------------------------------------------------------------------------------------------------------------------------------------------------------------|------------------------------------------------------------|----------------------------------------------------------------------------------------------------|
| <p>Instructies: De lijn naast elke vraag staat voor hoeveel PIJN u heeft in verschillende situaties. De linker kant (0) is "geen pijn" en de rechter kant (100) is "ergste pijn denkbaar". Geef voor de onderstaande situaties op de lijn aan hoeveel PIJN u in de afgelopen week in de enkel had. Als een of meerdere van deze situaties niet van toepassing waren, dan kiest u de "niet van toepassing" optie.</p> |                                                            |                                                                                                    |
| 9.1                                                                                                                                                                                                                                                                                                                                                                                                                  | Wat was de hoogte van de ergste pijn in de afgelopen week? | (0.00) (100.00)                                                                                    |
| 9.2                                                                                                                                                                                                                                                                                                                                                                                                                  | Heeft u pijn als u 's ochtends opstaat?                    | <input type="radio"/> Ja<br><input type="radio"/> Nee<br><input type="radio"/> Niet van toepassing |

|    |       |                                                                                                                     |                                           |
|----|-------|---------------------------------------------------------------------------------------------------------------------|-------------------------------------------|
| 1  |       |                                                                                                                     |                                           |
| 2  | 9.2.1 | <b><i>If 'Heeft u pijn als u 's ochtends opstaat?' is equal to 'Ja' answer this question:</i></b>                   | (0.00) (100.00)                           |
| 3  |       | Hoeveel pijn heeft u voordat u 's ochtends opstaat?                                                                 |                                           |
| 4  |       |                                                                                                                     |                                           |
| 5  |       |                                                                                                                     |                                           |
| 6  | 9.3   | Heeft u pijn wanneer u op blote voeten loopt?                                                                       | <input type="radio"/> Ja                  |
| 7  |       |                                                                                                                     | <input type="radio"/> Nee                 |
| 8  |       |                                                                                                                     | <input type="radio"/> Niet van toepassing |
| 9  |       |                                                                                                                     |                                           |
| 10 |       |                                                                                                                     |                                           |
| 11 |       |                                                                                                                     |                                           |
| 12 | 9.3.1 | <b><i>If 'Heeft u pijn wanneer u op blote voeten loopt?' is equal to 'Ja' answer this question:</i></b>             | (0.00) (100.00)                           |
| 13 |       | Hoeveel pijn heeft u als u op blote voeten loopt?                                                                   |                                           |
| 14 |       |                                                                                                                     |                                           |
| 15 |       |                                                                                                                     |                                           |
| 16 | 9.4   | Heeft u pijn wanneer u op blote voeten staat?                                                                       | <input type="radio"/> Ja                  |
| 17 |       |                                                                                                                     | <input type="radio"/> Nee                 |
| 18 |       |                                                                                                                     | <input type="radio"/> Niet van toepassing |
| 19 |       |                                                                                                                     |                                           |
| 20 |       |                                                                                                                     |                                           |
| 21 |       |                                                                                                                     |                                           |
| 22 | 9.4.1 | <b><i>If 'Heeft u pijn wanneer u op blote voeten staat?' is equal to 'Ja' answer this question:</i></b>             | (0.00) (100.00)                           |
| 23 |       | Hoeveel pijn heeft u als u op blote voeten staat?                                                                   |                                           |
| 24 |       |                                                                                                                     |                                           |
| 25 |       |                                                                                                                     |                                           |
| 26 | 9.5   | Heeft u pijn wanneer u met schoenen loopt?                                                                          | <input type="radio"/> Ja                  |
| 27 |       |                                                                                                                     | <input type="radio"/> Nee                 |
| 28 |       |                                                                                                                     | <input type="radio"/> Niet van toepassing |
| 29 |       |                                                                                                                     |                                           |
| 30 |       |                                                                                                                     |                                           |
| 31 |       |                                                                                                                     |                                           |
| 32 | 9.5.1 | <b><i>If 'Heeft u pijn wanneer u met schoenen loopt?' is equal to 'Ja' answer this question:</i></b>                | (0.00) (100.00)                           |
| 33 |       | Hoeveel pijn heeft u wanneer u met schoenen loopt?                                                                  |                                           |
| 34 |       |                                                                                                                     |                                           |
| 35 |       |                                                                                                                     |                                           |
| 36 | 9.6   | Heeft u pijn wanneer u met schoenen staat?                                                                          | <input type="radio"/> Ja                  |
| 37 |       |                                                                                                                     | <input type="radio"/> Nee                 |
| 38 |       |                                                                                                                     | <input type="radio"/> Niet van toepassing |
| 39 |       |                                                                                                                     |                                           |
| 40 |       |                                                                                                                     |                                           |
| 41 |       |                                                                                                                     |                                           |
| 42 | 9.6.1 | <b><i>If 'Heeft u pijn wanneer u met schoenen staat?' is equal to 'Ja' answer this question:</i></b>                | (0.00) (100.00)                           |
| 43 |       | Hoeveel pijn heeft u wanneer u met schoenen staat?                                                                  |                                           |
| 44 |       |                                                                                                                     |                                           |
| 45 |       |                                                                                                                     |                                           |
| 46 | 9.7   | Heeft u pijn wanneer u loopt met steunzolen of een brace?                                                           | <input type="radio"/> Ja                  |
| 47 |       |                                                                                                                     | <input type="radio"/> Nee                 |
| 48 |       |                                                                                                                     | <input type="radio"/> Niet van toepassing |
| 49 |       |                                                                                                                     |                                           |
| 50 |       |                                                                                                                     |                                           |
| 51 |       |                                                                                                                     |                                           |
| 52 | 9.7.1 | <b><i>If 'Heeft u pijn wanneer u loopt met steunzolen of een brace?' is equal to 'Ja' answer this question:</i></b> | (0.00) (100.00)                           |
| 53 |       | Hoeveel pijn heeft u wanneer u loopt met steunzolen of een brace?                                                   |                                           |
| 54 |       |                                                                                                                     |                                           |
| 55 |       |                                                                                                                     |                                           |
| 56 |       |                                                                                                                     |                                           |
| 57 |       |                                                                                                                     |                                           |
| 58 |       |                                                                                                                     |                                           |
| 59 |       |                                                                                                                     |                                           |
| 60 |       |                                                                                                                     |                                           |

|    |        |                                                                                                              |                                           |          |
|----|--------|--------------------------------------------------------------------------------------------------------------|-------------------------------------------|----------|
| 1  |        |                                                                                                              |                                           |          |
| 2  | 9.8    | Heeft u pijn wanneer u staat met steunzolen of een brace?                                                    | <input type="radio"/> Ja                  |          |
| 3  |        |                                                                                                              | <input type="radio"/> Nee                 |          |
| 4  |        |                                                                                                              | <input type="radio"/> Niet van toepassing |          |
| 5  |        |                                                                                                              |                                           |          |
| 6  |        |                                                                                                              |                                           |          |
| 7  |        |                                                                                                              |                                           |          |
| 8  | 9.8.1  | <b>If 'Heeft u pijn wanneer u staat met steunzolen of een brace?' is equal to 'Ja' answer this question:</b> | (0.00)                                    | (100.00) |
| 9  |        | Hoeveel pijn heeft u wanneer u staat met steunzolen of een brace?                                            |                                           |          |
| 10 |        |                                                                                                              |                                           |          |
| 11 |        |                                                                                                              |                                           |          |
| 12 |        |                                                                                                              |                                           |          |
| 13 | 9.9    | Heeft u pijn aan het einde van de dag?                                                                       | <input type="radio"/> Ja                  |          |
| 14 |        |                                                                                                              | <input type="radio"/> Nee                 |          |
| 15 |        |                                                                                                              | <input type="radio"/> Niet van toepassing |          |
| 16 |        |                                                                                                              |                                           |          |
| 17 |        |                                                                                                              |                                           |          |
| 18 |        |                                                                                                              |                                           |          |
| 19 | 9.9.1  | <b>If 'Heeft u pijn aan het einde van de dag?' is equal to 'Ja' answer this question:</b>                    | (0.00)                                    | (100.00) |
| 20 |        | Hoeveel pijn heeft u aan het einde van de dag?                                                               |                                           |          |
| 21 |        |                                                                                                              |                                           |          |
| 22 |        |                                                                                                              |                                           |          |
| 23 |        | Instructies:De lijn naast elke vraag staat voor hoeveel MOEITE u heeft met verschillende activiteiten.       |                                           |          |
| 24 |        | De linker kant (0) is "Niet moeilijk" en de rechter kant (100) is "Te moeilijk, niet uitvoerbaar". Geef voor |                                           |          |
| 25 |        | de onderstaande activiteiten op de lijn aan hoeveel MOEITE u in de afgelopen week door                       |                                           |          |
| 26 |        | enkelklachten had met onderstaande activiteiten. Als een situatie niet van toepassing is, kies dan de        |                                           |          |
| 27 |        | optie "niet van toepassing".                                                                                 |                                           |          |
| 28 |        |                                                                                                              |                                           |          |
| 29 |        |                                                                                                              |                                           |          |
| 30 | 9.10   | Heeft u moeite met door het huis lopen?                                                                      | <input type="radio"/> Ja                  |          |
| 31 |        |                                                                                                              | <input type="radio"/> Nee                 |          |
| 32 |        |                                                                                                              | <input type="radio"/> Niet van toepassing |          |
| 33 |        |                                                                                                              |                                           |          |
| 34 |        |                                                                                                              |                                           |          |
| 35 | 9.10.1 | <b>If 'Heeft u moeite met door het huis lopen?' is equal to 'Ja' answer this question:</b>                   | (0.00)                                    | (100.00) |
| 36 |        | Hoeveel moeite heeft u met door het huis lopen?                                                              |                                           |          |
| 37 |        |                                                                                                              |                                           |          |
| 38 |        |                                                                                                              |                                           |          |
| 39 |        |                                                                                                              |                                           |          |
| 40 | 9.11   | Heeft u moeite met buiten lopen op oneven ondergrond?                                                        | <input type="radio"/> Ja                  |          |
| 41 |        |                                                                                                              | <input type="radio"/> Nee                 |          |
| 42 |        |                                                                                                              | <input type="radio"/> Niet van toepassing |          |
| 43 |        |                                                                                                              |                                           |          |
| 44 |        |                                                                                                              |                                           |          |
| 45 | 9.11.1 | <b>If 'Heeft u moeite met buiten lopen op oneven ondergrond?' is equal to 'Ja' answer this question:</b>     | (0.00)                                    | (100.00) |
| 46 |        | Hoeveel moeite heeft u met buiten lopen op oneven ondergrond?                                                |                                           |          |
| 47 |        |                                                                                                              |                                           |          |
| 48 |        |                                                                                                              |                                           |          |
| 49 |        |                                                                                                              |                                           |          |
| 50 |        |                                                                                                              |                                           |          |
| 51 | 9.12   | Heeft u moeite met een paar honderd meter lopen?                                                             | <input type="radio"/> Ja                  |          |
| 52 |        |                                                                                                              | <input type="radio"/> Nee                 |          |
| 53 |        |                                                                                                              | <input type="radio"/> Niet van toepassing |          |
| 54 |        |                                                                                                              |                                           |          |
| 55 |        |                                                                                                              |                                           |          |
| 56 | 9.12.1 | <b>If 'Heeft u moeite met een paar honderd meter lopen?' is equal to 'Ja' answer this question:</b>          | (0.00)                                    | (100.00) |
| 57 |        | Hoeveel moeite heeft u met een paar honderd meter lopen?                                                     |                                           |          |
| 58 |        |                                                                                                              |                                           |          |
| 59 |        |                                                                                                              |                                           |          |
| 60 |        |                                                                                                              |                                           |          |

|    |        |                                                                                                             |                                           |          |
|----|--------|-------------------------------------------------------------------------------------------------------------|-------------------------------------------|----------|
| 1  |        |                                                                                                             |                                           |          |
| 2  | 9.13   | Heeft u moeite met een trap oplopen?                                                                        | <input type="radio"/> Ja                  |          |
| 3  |        |                                                                                                             | <input type="radio"/> Nee                 |          |
| 4  |        |                                                                                                             | <input type="radio"/> Niet van toepassing |          |
| 5  |        |                                                                                                             |                                           |          |
| 6  |        |                                                                                                             |                                           |          |
| 7  |        |                                                                                                             |                                           |          |
| 8  | 9.13.1 | <b>If 'Heeft u moeite met een trap oplopen?' is equal to 'Ja' answer this question:</b>                     | (0.00)                                    | (100.00) |
| 9  |        | Hoeveel moeite heeft u met een trap oplopen?                                                                |                                           |          |
| 10 |        |                                                                                                             |                                           |          |
| 11 |        |                                                                                                             |                                           |          |
| 12 | 9.14   | Heeft u moeite met een trap aflopen?                                                                        | <input type="radio"/> Ja                  |          |
| 13 |        |                                                                                                             | <input type="radio"/> Nee                 |          |
| 14 |        |                                                                                                             | <input type="radio"/> Niet van toepassing |          |
| 15 |        |                                                                                                             |                                           |          |
| 16 |        |                                                                                                             |                                           |          |
| 17 |        |                                                                                                             |                                           |          |
| 18 | 9.14.1 | <b>If 'Heeft u moeite met een trap aflopen?' is equal to 'Ja' answer this question:</b>                     | (0.00)                                    | (100.00) |
| 19 |        | Hoeveel moeite heeft u met een trap aflopen?                                                                |                                           |          |
| 20 |        |                                                                                                             |                                           |          |
| 21 |        |                                                                                                             |                                           |          |
| 22 | 9.15   | Heeft u moeite met op de tenen staan?                                                                       | <input type="radio"/> Ja                  |          |
| 23 |        |                                                                                                             | <input type="radio"/> Nee                 |          |
| 24 |        |                                                                                                             | <input type="radio"/> Niet van toepassing |          |
| 25 |        |                                                                                                             |                                           |          |
| 26 |        |                                                                                                             |                                           |          |
| 27 |        |                                                                                                             |                                           |          |
| 28 | 9.15.1 | <b>If 'Heeft u moeite met op de tenen staan?' is equal to 'Ja' answer this question:</b>                    | (0.00)                                    | (100.00) |
| 29 |        | Hoeveel moeite heeft u met op de tenen staan?                                                               |                                           |          |
| 30 |        |                                                                                                             |                                           |          |
| 31 |        |                                                                                                             |                                           |          |
| 32 | 9.16   | Heeft u moeite met opstaan uit de stoel?                                                                    | <input type="radio"/> Ja                  |          |
| 33 |        |                                                                                                             | <input type="radio"/> Nee                 |          |
| 34 |        |                                                                                                             | <input type="radio"/> Niet van toepassing |          |
| 35 |        |                                                                                                             |                                           |          |
| 36 |        |                                                                                                             |                                           |          |
| 37 |        |                                                                                                             |                                           |          |
| 38 | 9.16.1 | <b>If 'Heeft u moeite met opstaan uit de stoel?' is equal to 'Ja' answer this question:</b>                 | (0.00)                                    | (100.00) |
| 39 |        | Hoeveel moeite heeft u met opstaan uit de stoel?                                                            |                                           |          |
| 40 |        |                                                                                                             |                                           |          |
| 41 |        |                                                                                                             |                                           |          |
| 42 | 9.17   | Heeft u moeite met het op- of afstappen van stoepranden?                                                    | <input type="radio"/> Ja                  |          |
| 43 |        |                                                                                                             | <input type="radio"/> Nee                 |          |
| 44 |        |                                                                                                             | <input type="radio"/> Niet van toepassing |          |
| 45 |        |                                                                                                             |                                           |          |
| 46 |        |                                                                                                             |                                           |          |
| 47 |        |                                                                                                             |                                           |          |
| 48 | 9.17.1 | <b>If 'Heeft u moeite met het op- of afstappen van stoepranden?' is equal to 'Ja' answer this question:</b> | (0.00)                                    | (100.00) |
| 49 |        | Hoeveel moeite heeft u met het op- of afstappen van stoepranden?                                            |                                           |          |
| 50 |        |                                                                                                             |                                           |          |
| 51 |        |                                                                                                             |                                           |          |
| 52 |        |                                                                                                             |                                           |          |
| 53 |        |                                                                                                             |                                           |          |
| 54 | 9.18   | Heeft u moeite met snel lopen of rennen?                                                                    | <input type="radio"/> Ja                  |          |
| 55 |        |                                                                                                             | <input type="radio"/> Nee                 |          |
| 56 |        |                                                                                                             | <input type="radio"/> Niet van toepassing |          |
| 57 |        |                                                                                                             |                                           |          |
| 58 |        |                                                                                                             |                                           |          |
| 59 |        |                                                                                                             |                                           |          |
| 60 |        |                                                                                                             |                                           |          |

9.18.1 ***If 'Heeft u moeite met snel lopen of rennen?' is equal to 'Ja' answer this question:*** (0.00) (100.00)  
 Hoeveel moeite heeft u met snel lopen of rennen?

## Vragenlijst PRIMA studie 12 weken - FAOS

| Number | Question                                                                                                                                                                                                                                                                                                                                                                                                                                                                                                                                                                            | Answers                                                                                                                                                    |
|--------|-------------------------------------------------------------------------------------------------------------------------------------------------------------------------------------------------------------------------------------------------------------------------------------------------------------------------------------------------------------------------------------------------------------------------------------------------------------------------------------------------------------------------------------------------------------------------------------|------------------------------------------------------------------------------------------------------------------------------------------------------------|
|        | Deze lijst vraagt naar uw mening over uw voet/enkel. Uw antwoorden geven ons een beeld van uw voet/enkel klachten en hoe u in staat bent om alledaagse activiteiten uit te voeren in uw huidige situatie. Beantwoorden van een vraag doet u door het aanklikken van een vakje met het volgens u meest juiste antwoord (één vakje per vraag). Als u niet zeker weet hoe u een vraag moet beantwoorden, geeft u dan het antwoord dat volgens u het meest op uw situatie van toepassing is. Deze vraag heeft betrekking op het voorkomen van voet/enkel klachten in de afgelopen week. |                                                                                                                                                            |
| 10.1   | Is uw voet/enkel gezwollen?                                                                                                                                                                                                                                                                                                                                                                                                                                                                                                                                                         | <input type="radio"/> Nooit <input type="radio"/> Zelden <input type="radio"/> Soms <input type="radio"/> Vaak <input type="radio"/> Altijd                |
| 10.2   | Voelt u gekraak of hoort u klikken of een ander vreemd geluid wanneer u de voet/enkel beweegt?                                                                                                                                                                                                                                                                                                                                                                                                                                                                                      | <input type="radio"/> Nooit <input type="radio"/> Zelden <input type="radio"/> Soms <input type="radio"/> Vaak <input type="radio"/> Altijd                |
| 10.3   | Hapert uw enkel of blokkeert uw enkel ('op slot' gaan zitten) wanneer u deze beweegt?                                                                                                                                                                                                                                                                                                                                                                                                                                                                                               | <input type="radio"/> Nooit <input type="radio"/> Zelden <input type="radio"/> Soms <input type="radio"/> Vaak <input type="radio"/> Altijd                |
| 10.4   | Kunt u de voet/enkel volledig strekken?                                                                                                                                                                                                                                                                                                                                                                                                                                                                                                                                             | <input type="radio"/> Altijd <input type="radio"/> Vaak <input type="radio"/> Soms <input type="radio"/> Zelden <input type="radio"/> Nooit                |
| 10.5   | Kunt u de voet volledig naar u toe buigen?                                                                                                                                                                                                                                                                                                                                                                                                                                                                                                                                          | <input type="radio"/> Altijd <input type="radio"/> Vaak <input type="radio"/> Soms <input type="radio"/> Zelden <input type="radio"/> Nooit                |
| 10.6   | In welke mate heeft u een stijf gevoel in de voet/enkel 's ochtends bij het wakker worden?                                                                                                                                                                                                                                                                                                                                                                                                                                                                                          | <input type="radio"/> Niet Ernstig <input type="radio"/> Mild <input type="radio"/> Matig <input type="radio"/> Zeer ernstig                               |
| 10.7   | In welke mate heeft u een stijf gevoel in de voet/enkel na zitten, liggen of rusten later op de dag?                                                                                                                                                                                                                                                                                                                                                                                                                                                                                | <input type="radio"/> Niet Ernstig <input type="radio"/> Mild <input type="radio"/> Matig <input type="radio"/> Zeer ernstig                               |
| 10.8   | Hoe vaak heeft u pijn in uw voet/enkel?                                                                                                                                                                                                                                                                                                                                                                                                                                                                                                                                             | <input type="radio"/> Nooit <input type="radio"/> Maandelijks <input type="radio"/> Wekelijks <input type="radio"/> Dagelijks <input type="radio"/> Altijd |

1  
2  
3  
4  
5  
6  
7  
8  
9

---

10.9 Hoeveel voet/enkel pijn heeft u gehad in de afgelopen week bij draaien als uw voet/enkel op de grond staat?

Geen  
 Mild  
 Matig  
 Ernstig  
 Zeer ernstig

---

10  
11  
12  
13  
14  
15  
16  
17  
18

---

10.10 Hoeveel voet/enkel pijn heeft u gehad in de afgelopen week bij het volledig uitstrekken van de voet/enkel?

Geen  
 Mild  
 Matig  
 Ernstig  
 Zeer ernstig

---

19  
20  
21  
22  
23  
24  
25  
26

---

10.11 Hoeveel voet/enkel pijn heeft u gehad in de afgelopen week bij het volledig naar u toe buigen/optrekken van de voet/enkel

Geen  
 Mild  
 Matig  
 Ernstig  
 Zeer ernstig

---

27  
28  
29  
30  
31  
32  
33  
34

---

10.12 Hoeveel voet/enkel pijn heeft u gehad in de afgelopen week bij het lopen op een vlakke ondergrond

Geen  
 Mild  
 Matig  
 Ernstig  
 Zeer ernstig

---

35  
36  
37  
38  
39  
40  
41  
42  
43

---

10.13 Hoeveel voet/enkel pijn heeft u gehad in de afgelopen week bij het trap op- en trap af lopen?

Geen  
 Mild  
 Matig  
 Ernstig  
 Zeer ernstig

---

44  
45  
46  
47  
48  
49  
50  
51

---

10.14 Hoeveel voet/enkel pijn heeft u gehad in de afgelopen week 's nachts in bed?

Geen  
 Mild  
 Matig  
 Ernstig  
 Zeer ernstig

---

52  
53  
54  
55  
56  
57  
58  
59  
60

---

10.15 Hoeveel voet/enkel pijn heeft u gehad in de afgelopen week bij het zitten of liggen?

Geen  
 Mild  
 Matig  
 Ernstig  
 Zeer ernstig



|    |       |                                                                                                                        |                                    |                                    |
|----|-------|------------------------------------------------------------------------------------------------------------------------|------------------------------------|------------------------------------|
| 1  |       |                                                                                                                        |                                    |                                    |
| 2  | 10.16 | Hoeveel voet/enkel pijn heeft u gehad in de afgelopen week bij het rechtop staan?                                      | <input type="radio"/> Geen         |                                    |
| 3  |       |                                                                                                                        | <input type="radio"/> Mild         |                                    |
| 4  |       |                                                                                                                        | <input type="radio"/> Matig        |                                    |
| 5  |       |                                                                                                                        | <input type="radio"/> Ernstig      |                                    |
| 6  |       |                                                                                                                        | <input type="radio"/> Zeer ernstig |                                    |
| 7  |       |                                                                                                                        |                                    |                                    |
| 8  |       |                                                                                                                        |                                    |                                    |
| 9  |       |                                                                                                                        |                                    |                                    |
| 10 | 10.17 | In welke mate werd u gehinderd bij het trap aflopen?                                                                   | <input type="radio"/> Niet         | <input type="radio"/> Mild         |
| 11 |       |                                                                                                                        | <input type="radio"/> Matig        | <input type="radio"/>              |
| 12 |       |                                                                                                                        | Ernstig                            | <input type="radio"/> Zeer ernstig |
| 13 |       |                                                                                                                        |                                    |                                    |
| 14 |       |                                                                                                                        |                                    |                                    |
| 15 | 10.18 | In welke mate werd u gehinderd bij het trap op lopen?                                                                  | <input type="radio"/> Niet         | <input type="radio"/> Mild         |
| 16 |       |                                                                                                                        | <input type="radio"/> Matig        | <input type="radio"/>              |
| 17 |       |                                                                                                                        | Ernstig                            | <input type="radio"/> Zeer ernstig |
| 18 |       |                                                                                                                        |                                    |                                    |
| 19 | 10.19 | In welke mate werd u gehinderd als u vanuit een zittende positie ging staan?                                           | <input type="radio"/> Niet         | <input type="radio"/> Mild         |
| 20 |       |                                                                                                                        | <input type="radio"/> Matig        | <input type="radio"/>              |
| 21 |       |                                                                                                                        | Ernstig                            | <input type="radio"/> Zeer ernstig |
| 22 |       |                                                                                                                        |                                    |                                    |
| 23 |       |                                                                                                                        |                                    |                                    |
| 24 | 10.20 | In welke mate werd u gehinderd bij het staan?                                                                          | <input type="radio"/> Niet         | <input type="radio"/> Mild         |
| 25 |       |                                                                                                                        | <input type="radio"/> Matig        | <input type="radio"/>              |
| 26 |       |                                                                                                                        | Ernstig                            | <input type="radio"/> Zeer ernstig |
| 27 |       |                                                                                                                        |                                    |                                    |
| 28 | 10.21 | In welke mate werd u gehinderd bij het naar de grond buigen/iets oprapen?                                              | <input type="radio"/> Niet         | <input type="radio"/> Mild         |
| 29 |       |                                                                                                                        | <input type="radio"/> Matig        | <input type="radio"/>              |
| 30 |       |                                                                                                                        | Ernstig                            | <input type="radio"/> Zeer ernstig |
| 31 |       |                                                                                                                        |                                    |                                    |
| 32 | 10.22 | In welke mate werd u gehinderd bij het lopen op een vlakke ondergrond?                                                 | <input type="radio"/> Niet         | <input type="radio"/> Mild         |
| 33 |       |                                                                                                                        | <input type="radio"/> Matig        | <input type="radio"/>              |
| 34 |       |                                                                                                                        | Ernstig                            | <input type="radio"/> Zeer ernstig |
| 35 |       |                                                                                                                        |                                    |                                    |
| 36 |       |                                                                                                                        |                                    |                                    |
| 37 | 10.23 | In welke mate werd u gehinderd bij het in- en uit de auto stappen?                                                     | <input type="radio"/> Niet         | <input type="radio"/> Mild         |
| 38 |       |                                                                                                                        | <input type="radio"/> Matig        | <input type="radio"/>              |
| 39 |       |                                                                                                                        | Ernstig                            | <input type="radio"/> Zeer ernstig |
| 40 |       |                                                                                                                        |                                    |                                    |
| 41 | 10.24 | In welke mate werd u gehinderd bij het boodschappen doen?                                                              | <input type="radio"/> Niet         | <input type="radio"/> Mild         |
| 42 |       |                                                                                                                        | <input type="radio"/> Matig        | <input type="radio"/>              |
| 43 |       |                                                                                                                        | Ernstig                            | <input type="radio"/> Zeer ernstig |
| 44 |       |                                                                                                                        |                                    |                                    |
| 45 | 10.25 | In welke mate werd u gehinderd bij sokken/panty's aantrekken?                                                          | <input type="radio"/> Niet         | <input type="radio"/> Mild         |
| 46 |       |                                                                                                                        | <input type="radio"/> Matig        | <input type="radio"/>              |
| 47 |       |                                                                                                                        | Ernstig                            | <input type="radio"/> Zeer ernstig |
| 48 |       |                                                                                                                        |                                    |                                    |
| 49 |       |                                                                                                                        |                                    |                                    |
| 50 | 10.26 | In welke mate werd u gehinderd bij het opstaan uit bed?                                                                | <input type="radio"/> Niet         | <input type="radio"/> Mild         |
| 51 |       |                                                                                                                        | <input type="radio"/> Matig        | <input type="radio"/>              |
| 52 |       |                                                                                                                        | Ernstig                            | <input type="radio"/> Zeer ernstig |
| 53 |       |                                                                                                                        |                                    |                                    |
| 54 | 10.27 | In welke mate werd u gehinderd bij het sokken uittrekken?                                                              | <input type="radio"/> Niet         | <input type="radio"/> Mild         |
| 55 |       |                                                                                                                        | <input type="radio"/> Matig        | <input type="radio"/>              |
| 56 |       |                                                                                                                        | Ernstig                            | <input type="radio"/> Zeer ernstig |
| 57 |       |                                                                                                                        |                                    |                                    |
| 58 |       |                                                                                                                        |                                    |                                    |
| 59 | 10.28 | In welke mate werd u gehinderd bij het in bed liggen (omdraaien, lange tijd uw voet/enkel in dezelfde positie houden)? | <input type="radio"/> Niet         | <input type="radio"/> Mild         |
| 60 |       |                                                                                                                        | <input type="radio"/> Matig        | <input type="radio"/>              |
|    |       |                                                                                                                        | Ernstig                            | <input type="radio"/> Zeer ernstig |

|       |                                                                                                                  |                                                                                                                                                                    |                                                                      |                             |                              |
|-------|------------------------------------------------------------------------------------------------------------------|--------------------------------------------------------------------------------------------------------------------------------------------------------------------|----------------------------------------------------------------------|-----------------------------|------------------------------|
| 10.29 | In welke mate werd u gehinderd bij het in/uit bad stappen?                                                       | <input type="radio"/> Niet<br>Ernstig                                                                                                                              | <input type="radio"/> Mild<br><input type="radio"/> Zeer ernstig     | <input type="radio"/> Matig | <input type="radio"/>        |
| 10.30 | In welke mate werd u gehinderd bij zitten?                                                                       | <input type="radio"/> Niet<br>Ernstig                                                                                                                              | <input type="radio"/> Mild<br><input type="radio"/> Zeer ernstig     | <input type="radio"/> Matig | <input type="radio"/>        |
| 10.31 | In welke mate werd u gehinderd bij het toilet op en af gaan?                                                     | <input type="radio"/> Niet<br>Ernstig                                                                                                                              | <input type="radio"/> Mild<br><input type="radio"/> Zeer ernstig     | <input type="radio"/> Matig | <input type="radio"/>        |
| 10.32 | In welke mate werd u gehinderd bij zwaar huishoudelijk werk (bijvoorbeeld zware dozen sjouwen, vloer schrobben)? | <input type="radio"/> Niet<br>Ernstig                                                                                                                              | <input type="radio"/> Mild<br><input type="radio"/> Zeer ernstig     | <input type="radio"/> Matig | <input type="radio"/>        |
| 10.33 | In welke mate werd u gehinderd bij licht huishoudelijk werk (bijvoorbeeld koken, afstoffen)?                     | <input type="radio"/> Niet<br>Ernstig                                                                                                                              | <input type="radio"/> Mild<br><input type="radio"/> Zeer ernstig     | <input type="radio"/> Matig | <input type="radio"/>        |
| 10.34 | In welke mate werd u gehinderd bij hurken?                                                                       | <input type="radio"/> Niet<br>Ernstig                                                                                                                              | <input type="radio"/> Mild<br><input type="radio"/> Zeer ernstig     | <input type="radio"/> Matig | <input type="radio"/>        |
| 10.35 | In welke mate werd u gehinderd bij hardlopen?                                                                    | <input type="radio"/> Niet<br>Ernstig                                                                                                                              | <input type="radio"/> Mild<br><input type="radio"/> Zeer ernstig     | <input type="radio"/> Matig | <input type="radio"/>        |
| 10.36 | In welke mate werd u gehinderd bij springen?                                                                     | <input type="radio"/> Niet<br>Ernstig                                                                                                                              | <input type="radio"/> Mild<br><input type="radio"/> Zeer ernstig     | <input type="radio"/> Matig | <input type="radio"/>        |
| 10.37 | In welke mate werd u gehinderd bij ronddraaien op uw aangedane voet/enkel?                                       | <input type="radio"/> Niet<br>Ernstig                                                                                                                              | <input type="radio"/> Mild<br><input type="radio"/> Zeer ernstig     | <input type="radio"/> Matig | <input type="radio"/>        |
| 10.38 | In welke mate werd u gehinderd bij knielen?                                                                      | <input type="radio"/> Niet<br>Ernstig                                                                                                                              | <input type="radio"/> Mild<br><input type="radio"/> Zeer ernstig     | <input type="radio"/> Matig | <input type="radio"/>        |
| 10.39 | Hoe vaak bent u zich bewust van uw voet/enkel probleem?                                                          | <input type="radio"/> Nooit<br>Wekelijks                                                                                                                           | <input type="radio"/> Maandelijks<br><input type="radio"/> Dagelijks | <input type="radio"/>       | <input type="radio"/> Altijd |
| 10.40 | Heeft u uw leven veranderd om activiteiten te vermijden die schadelijk kunnen zijn voor uw voet/enkel?           | <input type="radio"/> Niet<br><input type="radio"/> Enigszins<br><input type="radio"/> Matig<br><input type="radio"/> Behoorlijk<br><input type="radio"/> Volledig |                                                                      |                             |                              |

- 1  
2  
3  
4  
5  
6  
7  
8  
9
- 10.41 In hoeverre kunt u op uw voet/enkel vertrouwen?
- Volledig
  - Behoorlijk
  - Matig
  - Enigzins
  - Niet
- 
- 10.42 In het algemeen, in welke mate ondervindt u hinder van uw voet/enkel
- Geen
  - Mild
  - Matig
  - Ernstig
  - Zeer ernstig

23  
24  
25  
26  
27  
28  
29  
30  
31  
32  
33  
34  
35

## Vragenlijst PRIMA studie 12 weken - PRODISQ - Gezondheid en werk

| Number | Question                                                                                                                                                                                                                                                                               | Answers                                                                                                                                                                                                                                                                                                                                                                                                                                                                                                                                                                |
|--------|----------------------------------------------------------------------------------------------------------------------------------------------------------------------------------------------------------------------------------------------------------------------------------------|------------------------------------------------------------------------------------------------------------------------------------------------------------------------------------------------------------------------------------------------------------------------------------------------------------------------------------------------------------------------------------------------------------------------------------------------------------------------------------------------------------------------------------------------------------------------|
| 11.1   | Wat is uw leeftijd?                                                                                                                                                                                                                                                                    | <input type="text"/> jaar                                                                                                                                                                                                                                                                                                                                                                                                                                                                                                                                              |
| 11.2   | Wat is uw geslacht?                                                                                                                                                                                                                                                                    | <input type="radio"/> Man<br><input type="radio"/> Vrouw                                                                                                                                                                                                                                                                                                                                                                                                                                                                                                               |
| 11.3   | Wat is de hoogste opleiding die u heeft afgemaakt (Zoek uw hoogste opleiding en kruis het hokje daarvoor aan)?                                                                                                                                                                         | <input type="checkbox"/> Ik heb geen school of opleiding afgemaakt<br><input type="checkbox"/> Lagere school of basisschool<br><input type="checkbox"/> Huishoudschool, vbo, lbo, lts, leao of lhno<br><input type="checkbox"/> Mavo, mulo, ivo of vmbo<br><input type="checkbox"/> Mbo, mts, meao, mhno, inas of intas<br><input type="checkbox"/> Havo, vwo, hbs, mms, atheneum of gymnasium<br><input type="checkbox"/> Hbo, hts, heao of hhno<br><input type="checkbox"/> Universiteit<br><input type="checkbox"/> Ik heb een andere opleiding afgemaakt, namelijk |
| 11.3.1 | <p><b><i>If 'Wat is de hoogste opleiding die u heeft afgemaakt (Zoek uw hoogste opleiding en kruis het hokje daarvoor aan)?' is equal to 'Ik heb een andere opleiding afgemaakt, namelijk' answer this question:</i></b></p> <p>Wat is de hoogste opleiding die u heeft afgemaakt?</p> | <input type="text"/>                                                                                                                                                                                                                                                                                                                                                                                                                                                                                                                                                   |

- 1  
2  
3  
4  
5  
6  
7  
8  
9  
10  
11  
12  
13
- 11.4 Wat doet u in het dagelijks leven?
- Ik zit op school, ik studeer
- Ik werk in loondienst
- Ik ben zelfstandig ondernemer
- Ik ben huisvrouw, huisman
- Ik ben werkloos
- Ik ben arbeidsongeschikt
- Ik ben met pensioen of prepensioen
- Ik doe iets anders, namelijk

14  
15  
16  
17

11.4.1 ***If 'Wat doet u in het dagelijks leven?' is equal to 'Ik ben arbeidsongeschikt' answer this question:***

Wat doet u in het dagelijks leven?

18  
19  
20  
21  
22  
23

11.4.2 ***If 'Wat doet u in het dagelijks leven?' is equal to 'Ik doe iets anders, namelijk' answer this question:***

Wat doet u in het dagelijks leven?

24  
25  
26  
27  
28

11.5 Hebt u betaald werk?

Nee

Ja

29  
30  
31  
32

11.5.1 ***If 'Hebt u betaald werk?' is equal to 'Ja' answer this question:***

Wat is uw beroep?

33  
34  
35  
36  
37

11.5.2 ***If 'Hebt u betaald werk?' is equal to 'Ja' answer this question:***

Hoeveel uur per week werkt u (Tel alleen de uren waarvoor u betaald wordt)?

uren

38  
39  
40  
41  
42

11.5.3 ***If 'Hebt u betaald werk?' is equal to 'Ja' answer this question:***

Hoeveel dagen in de week werkt u?

Dagen

43  
44  
45  
46  
47

11.5.4 ***If 'Hebt u betaald werk?' is equal to 'Ja' answer this question:***

Bent u in de afgelopen 4 weken afwezig geweest van uw werk omdat u ziek was?

Nee

Ja

48  
49  
50  
51  
52  
53  
54

11.5.4.1 ***If 'Bent u in de afgelopen 4 weken afwezig geweest van uw werk omdat u ziek was?' is equal to 'Ja' answer this question:***

Bent u in de afgelopen 4 weken afwezig geweest van uw werk omdat u ziek was (Tel alleen de werkdagen in de afgelopen 4 weken)?

dagen afwezig geweest

55  
56  
57  
58  
59  
60

11.5.4.2 ***If 'Bent u in de afgelopen 4 weken afwezig geweest van uw werk omdat u ziek was?' is equal to 'Ja' answer this question:***

Was u langer dan de gehele periode van 4 weken afwezig van uw werk doordat u ziek was?

Nee

Ja

|            |                                                                                                                                                                                                                                                                                                                                                                                                                 |                                                                             |                                            |
|------------|-----------------------------------------------------------------------------------------------------------------------------------------------------------------------------------------------------------------------------------------------------------------------------------------------------------------------------------------------------------------------------------------------------------------|-----------------------------------------------------------------------------|--------------------------------------------|
| 11.5.4.2.1 | <b>If 'Was u langer dan de gehele periode van 4 weken afwezig van uw werk doordat u ziek was?' is equal to 'Ja' answer this question:</b><br>Wanneer heeft u zich ziek gemeld?                                                                                                                                                                                                                                  | <input type="text"/> <input type="text"/> <input type="text"/> (dd-mm-yyyy) |                                            |
| 11.5.5     | <b>If 'Hebt u betaald werk?' is equal to 'Ja' answer this question:</b><br>Waren er in de afgelopen 4 weken, dagen waarop u wel gewerkt heeft, maar tijdens uw werk last had van lichamelijke of psychische problemen?                                                                                                                                                                                          | <input type="radio"/> Ja<br><input type="radio"/> Nee                       |                                            |
| 11.5.5.1   | <b>If 'Waren er in de afgelopen 4 weken, dagen waarop u wel gewerkt heeft, maar tijdens uw werk last had van lichamelijke of psychische problemen?' is equal to 'Ja' answer this question:</b><br>Op hoeveel werkdagen had u tijdens uw werk last van uw lichamelijke of psychische problemen?                                                                                                                  | <input type="text"/> werkdagen                                              |                                            |
| 11.5.5.2   | <b>If 'Waren er in de afgelopen 4 weken, dagen waarop u wel gewerkt heeft, maar tijdens uw werk last had van lichamelijke of psychische problemen?' is equal to 'Ja' answer this question:</b><br>Op de dagen dat u last had, kon u misschien niet zoveel werk doen als normaal. Hoeveel werk kon u op deze dagen gemiddeld doen?                                                                               | Ik kon op deze dagen niks doen (0.00)                                       | Ik kon net zoveel doen als normaal (10.00) |
| 11.6       | Waren er dagen waarop u minder onbetaald werk kon doen door uw lichamelijke of psychische problemen?                                                                                                                                                                                                                                                                                                            | <input type="radio"/> Nee<br><input type="radio"/> Ja                       |                                            |
| 11.6.1     | <b>If 'Waren er dagen waarop u minder onbetaald werk kon doen door uw lichamelijke of psychische problemen?' is equal to 'Ja' answer this question:</b><br>Op hoeveel dagen was dit zo?                                                                                                                                                                                                                         | <input type="text"/> Dagen                                                  |                                            |
| 11.6.2     | <b>If 'Waren er dagen waarop u minder onbetaald werk kon doen door uw lichamelijke of psychische problemen?' is equal to 'Ja' answer this question:</b><br>Stel dat iemand, bijvoorbeeld uw partner, familielid of een bekende, u op deze dagen had geholpen. En al het onbetaalde werk wat u niet kon doen, voor u had gedaan. Hoeveel uur was die persoon hier op deze dagen dan gemiddeld mee bezig geweest? | <input type="text"/> uur op deze dagen                                      |                                            |

## Vragenlijst PRIMA studie 12 weken - PRODISQ - Zorggebruik

| Number | Question | Answers |
|--------|----------|---------|
|--------|----------|---------|

Wij willen graag weten met welke dokters u in de afgelopen 3 maanden een afspraak had. Het gaat om afspraken voor uzelf. Ook andere zorgverleners tellen mee. Bijvoorbeeld de fysiotherapeut.

|        |                                                                                                                                                                                                                          |                                                       |
|--------|--------------------------------------------------------------------------------------------------------------------------------------------------------------------------------------------------------------------------|-------------------------------------------------------|
| 12.1   | Bent u in de afgelopen 3 maanden naar uw huisarts geweest?                                                                                                                                                               | <input type="radio"/> Nee<br><input type="radio"/> Ja |
| 12.1.1 | <b>If 'Bent u in de afgelopen 3 maanden naar uw huisarts geweest?' is equal to 'Ja' answer this question:</b><br>Hoeveel afspraken had u?                                                                                | <input type="text"/> afspraken                        |
| 12.2   | Bent u in de afgelopen 3 maanden in contact geweest met een maatschappelijk werker?                                                                                                                                      | <input type="radio"/> Nee<br><input type="radio"/> Ja |
| 12.2.1 | <b>If 'Bent u in de afgelopen 3 maanden in contact geweest met een maatschappelijk werker?' is equal to 'Ja' answer this question:</b><br>Hoeveel afspraken had u?                                                       | <input type="text"/> afspraken                        |
| 12.3   | Bent u in de afgelopen 3 maanden naar een fysiotherapeut geweest? Of een caesartherapeut, therapeut mensendieck of een manueel therapeut?                                                                                | <input type="radio"/> Nee<br><input type="radio"/> Ja |
| 12.3.1 | <b>If 'Bent u in de afgelopen 3 maanden naar een fysiotherapeut geweest? Of een caesartherapeut, therapeut mensendieck of een manueel therapeut?' is equal to 'Ja' answer this question:</b><br>Hoeveel afspraken had u? | <input type="text"/> afspraken                        |
| 12.4   | Bent u in de afgelopen 3 maanden naar een ergotherapeut geweest?                                                                                                                                                         | <input type="radio"/> Nee<br><input type="radio"/> Ja |
| 12.4.1 | <b>If 'Bent u in de afgelopen 3 maanden naar een ergotherapeut geweest?' is equal to 'Ja' answer this question:</b><br>Hoeveel afspraken had u?                                                                          | <input type="text"/> afspraken                        |
| 12.5   | Bent u in de afgelopen 3 maanden naar een logopedist geweest?                                                                                                                                                            | <input type="radio"/> Nee<br><input type="radio"/> Ja |
| 12.5.1 | <b>If 'Bent u in de afgelopen 3 maanden naar een logopedist geweest?' is equal to 'Ja' answer this question:</b><br>Hoeveel afspraken had u?                                                                             | <input type="text"/> afspraken                        |
| 12.6   | Bent u in de afgelopen 3 maanden naar een diëtist geweest?                                                                                                                                                               | <input type="radio"/> Nee<br><input type="radio"/> Ja |
| 12.6.1 | <b>If 'Bent u in de afgelopen 3 maanden naar een diëtist geweest?' is equal to 'Ja' answer this question:</b><br>Hoeveel afspraken had u?                                                                                | <input type="text"/> afspraken                        |

1  
2  
3  
4  
5

12.7 Bent u in de afgelopen 3 maanden naar een homeopaat geweest? Of een acupuncturist?  Nee  
 Ja

6  
7  
8  
9  
10

12.7.1 **If 'Bent u in de afgelopen 3 maanden naar een homeopaat geweest? Of een acupuncturist?' is equal to 'Ja' answer this question:**  afspraken  
Hoeveel afspraken had u?

11  
12  
13  
14  
15

12.8 Bent u in de afgelopen 3 maanden naar een psycholoog geweest? Of een psychotherapeut of psychiater?  Nee  
 Ja

16  
17  
18  
19  
20

12.8.1 **If 'Bent u in de afgelopen 3 maanden naar een psycholoog geweest? Of een psychotherapeut of psychiater?' is equal to 'Ja' answer this question:**  afspraken  
Hoeveel afspraken had u?

21  
22  
23  
24  
25

12.9 Heeft u in de afgelopen 3 maanden afspraken gehad met de bedrijfsarts?  Nee  
 Ja

26  
27  
28  
29  
30

12.9.1 **If 'Heeft u in de afgelopen 3 maanden afspraken gehad met de bedrijfsarts?' is equal to 'Ja' answer this question:**  afspraken  
Hoeveel afspraken had u?

31  
32  
33  
34  
35

12.10 Heeft u in de afgelopen 3 maanden hulp van de thuiszorg gehad?  Ja  
 Nee

36  
37  
38  
39  
40  
41  
42  
43  
44  
45

12.10.1 **If 'Heeft u in de afgelopen 3 maanden hulp van de thuiszorg gehad?' is equal to 'Ja' answer this question:**  Huishoudelijke hulp; voorbeeld: stofzuigen, bed opmaken, boodschappen doen  
Wat voor hulp van de thuiszorg heeft u gehad in de afgelopen 3 maanden?  Verzorging van uzelf; voorbeeld: hulp bij douchen of aankleden  
 Verpleging; voorbeeld: verband omdoen, medicijnen geven, bloeddruk meten

46  
47  
48  
49  
50  
51  
52  
53  
54

12.10.1.1 **If 'Wat voor hulp van de thuiszorg heeft u gehad in de afgelopen 3 maanden?' is equal to 'Huishoudelijke hulp; voorbeeld: stofzuigen, bed opmaken, boodschappen doen' answer this question:**  weken in de afgelopen 3 maanden  
Hoeveel weken heeft u deze thuiszorg gehad?  
Huishoudelijke hulp:

55  
56  
57  
58  
59  
60

12.10.1.2 **If 'Wat voor hulp van de thuiszorg heeft u gehad in de afgelopen 3 maanden?' is equal to 'Verzorging van uzelf; voorbeeld: hulp bij douchen of aankleden' answer this question:**  weken in de afgelopen 3 maanden  
Hoeveel weken heeft u deze thuiszorg gehad?  
Verzorging van uzelf:

1  
2  
3  
4  
5  
6  
7  
8

12.10.1.3 **If 'Wat voor hulp van de thuiszorg heeft u gehad in de afgelopen 3 maanden?' is equal to 'Verpleging; voorbeeld: verband omdoen, medicijnen geven, bloeddruk meten' answer this question:**  
Hoeveel weken heeft u deze thuiszorg gehad?  
Verpleging:  weken in de afgelopen 3 maanden

9  
10  
11  
12  
13  
14  
15  
16  
17

12.10.1.4 **If 'Wat voor hulp van de thuiszorg heeft u gehad in de afgelopen 3 maanden?' is equal to 'Huishoudelijke hulp; voorbeeld: stofzuigen, bed opmaken, boodschappen doen' answer this question:**  
Hoeveel uur thuiszorg kreeg u in deze weken gemiddeld? Huishoudelijke hulp: gemiddeld  uur in de week

18  
19  
20  
21  
22  
23  
24

12.10.1.5 **If 'Wat voor hulp van de thuiszorg heeft u gehad in de afgelopen 3 maanden?' is equal to 'Verzorging van uzelf; voorbeeld: hulp bij douchen of aankleden' answer this question:**  
Hoeveel uur thuiszorg kreeg u in deze weken gemiddeld? Verzorging van uzelf: gemiddeld  uur in de week

25  
26  
27  
28  
29  
30  
31  
32

12.10.1.6 **If 'Wat voor hulp van de thuiszorg heeft u gehad in de afgelopen 3 maanden?' is equal to 'Verpleging; voorbeeld: verband omdoen, medicijnen geven, bloeddruk meten' answer this question:**  
Hoeveel uur thuiszorg kreeg u in deze weken gemiddeld? Verpleging: gemiddeld  uur in de week

33  
34  
35  
36

12.11 Heeft u in de afgelopen 3 maanden medicijnen gebruikt?  Ja  Nee

37  
38  
39  
40  
41  
42

12.11.1 **If 'Heeft u in de afgelopen 3 maanden medicijnen gebruikt?' is equal to 'Ja' answer this question:**  
Welke medicijnen heeft u in de afgelopen 3 maanden gebruikt?

43  
44  
45  
46  
47

12.12 Bent u in de afgelopen 3 maanden op de spoedeisende eerste hulp van een ziekenhuis geweest? (Een andere naam voor spoedeisende eerste hulp is EHBO)  Nee  Ja

48  
49  
50  
51  
52  
53  
54  
55

12.12.1 **If 'Bent u in de afgelopen 3 maanden op de spoedeisende eerste hulp van een ziekenhuis geweest? (Een andere naam voor spoedeisende eerste hulp is EHBO)' is equal to 'Ja' answer this question:**  
Hoe vaak bent u geweest?  keer

56  
57  
58  
59  
60

12.13 Bent u in de afgelopen 3 maanden met een ambulance naar het ziekenhuis gebracht? (Een andere naam voor ambulance is ziekenauto)  Nee  Ja



1  
2  
3  
4  
5  
6  
7

12.13.1 **If 'Bent u in de afgelopen 3 maanden met een ambulance naar het ziekenhuis gebracht? (Een andere naam voor ambulance is ziekenauto)' is equal to 'Ja' answer this question:**  
Hoe vaak bent u naar het ziekenhuis gebracht?

keer

8  
9  
10  
11  
12

12.14 Had u in de afgelopen 3 maanden een afspraak bij de polikliniek van het ziekenhuis? (Het gaat om afspraken voor uzelf met een dokter. Bijvoorbeeld met de cardioloog, reumatoloog of neuroloog)

Ja  
 Nee

13  
14  
15  
16  
17  
18  
19  
20  
21

12.14.1 **If 'Had u in de afgelopen 3 maanden een afspraak bij de polikliniek van het ziekenhuis? (Het gaat om afspraken voor uzelf met een dokter. Bijvoorbeeld met de cardioloog, reumatoloog of neuroloog)' is equal to 'Ja' answer this question:**  
Bij welke soorten dokters bent u in de afgelopen 3 maanden in het ziekenhuis geweest? En hoe vaak?

22  
23  
24  
25  
26

12.15 Bent u in de afgelopen 3 maanden overdag in het ziekenhuis geweest voor een behandeling? (U bleef dus niet slapen. U kwam bijvoorbeeld voor een bloedtransfusie, nierdialyse of chemokuur)

Ja  
 Nee

27  
28  
29  
30  
31  
32  
33  
34

12.15.1 **If 'Bent u in de afgelopen 3 maanden overdag in het ziekenhuis geweest voor een behandeling? (U bleef dus niet slapen. U kwam bijvoorbeeld voor een bloedtransfusie, nierdialyse of chemokuur)' is equal to 'Ja' answer this question:**  
Voor welke soort behandeling was dit?

35  
36  
37  
38  
39  
40  
41  
42

12.15.2 **If 'Bent u in de afgelopen 3 maanden overdag in het ziekenhuis geweest voor een behandeling? (U bleef dus niet slapen. U kwam bijvoorbeeld voor een bloedtransfusie, nierdialyse of chemokuur)' is equal to 'Ja' answer this question:**  
Hoeveel keer moest u in de afgelopen 3 maanden voor deze behandelingen naar het ziekenhuis?

43  
44  
45  
46  
47  
48  
49  
50

12.16 Bent u in de afgelopen 3 maanden ergens anders geweest voor een behandeling overdag? (U bleef dus niet slapen. U ging bijvoorbeeld naar de dagopvang van een woon-/zorgcentrum of een psychiatrische instelling. Of naar de dagbehandeling van een revalidatiecentrum)

Ja  
 Nee

51  
52  
53  
54  
55  
56  
57  
58  
59  
60

12.16.1 **If 'Bent u in de afgelopen 3 maanden ergens anders geweest voor een behandeling overdag? (U bleef dus niet slapen. U ging bijvoorbeeld naar de dagopvang van een woon-/zorgcentrum of een psychiatrische instelling. Of naar de dagbehandeling van een revalidatiecentrum)' is equal to 'Ja' answer this question:**  
Wat voor instelling was dit?

Woon-/zorgcentrum  
 Revalidatiecentrum  
 Psychiatrische instelling  
 Een andere instelling, namelijk

- 1  
2  
3  
4  
5  
6  
7
- 12.16.1.1 **If 'Wat voor instelling was dit?' is equal to 'Een andere instelling, namelijk' answer this question:**  
Wat voor instelling was dit?
- 8  
9  
10  
11  
12
- 12.16.1.2 **If 'Wat voor instelling was dit?' is equal to 'Woon-/zorgcentrum' answer this question:**  
Hoe vaak moest u hier in de afgelopen 3 maanden naartoe? Naar het woon-/zorgcentrum:
- 13  
14  
15  
16  
17
- 12.16.1.3 **If 'Wat voor instelling was dit?' is equal to 'Revalidatiecentrum' answer this question:**  
Hoe vaak moest u hier in de afgelopen 3 maanden naartoe? Naar het revalidatiecentrum:
- 18  
19  
20  
21  
22  
23
- 12.16.1.4 **If 'Wat voor instelling was dit?' is equal to 'Psychiatrische instelling' answer this question:**  
Hoe vaak moest u hier in de afgelopen 3 maanden naartoe? Naar de psychiatrische instelling:
- 24  
25  
26  
27  
28
- 12.16.1.5 **If 'Wat voor instelling was dit?' is equal to 'Een andere instelling, namelijk' answer this question:**  
Hoe vaak moest u hier in de afgelopen 3 maanden naartoe? Naar de andere instelling:
- 29  
30  
31  
32  
33
- 12.17 Heeft u in de afgelopen 3 maanden weleens in het ziekenhuis gelegen? (U moest dus blijven slapen. Bijvoorbeeld omdat u geopereerd was en niet meteen naar huis kon)
- 34  
35  
36  
37  
38  
39  
40  
41  
42
- 12.17.1 **If 'Heeft u in de afgelopen 3 maanden weleens in het ziekenhuis gelegen? (U moest dus blijven slapen. Bijvoorbeeld omdat u geopereerd was en niet meteen naar huis kon)' is equal to 'Ja' answer this question:**  
Hoe vaak heeft u in de afgelopen 3 maanden in het ziekenhuis gelegen?
- 43  
44  
45  
46  
47  
48  
49
- 12.17.2 **If 'Heeft u in de afgelopen 3 maanden weleens in het ziekenhuis gelegen? (U moest dus blijven slapen. Bijvoorbeeld omdat u geopereerd was en niet meteen naar huis kon)' is equal to 'Ja' answer this question:**  
Hoe lang heeft u in het ziekenhuis gelegen?
- 50  
51  
52  
53  
54  
55  
56  
57  
58  
59  
60

1  
2  
3  
4  
5  
6  
7  
8

12.18.1 **If 'Moest u in de afgelopen 3 maanden ergens anders blijven slapen voor uw gezondheid? (Bijvoorbeeld in een woon-/zorgcentrum, psychiatrische instelling of revalidatiecentrum)' is equal to 'Ja' answer this question:**  
Wat voor instelling was dit?

Woon-/zorgcentrum  
 Revalidatiecentrum  
 Psychiatrische instelling  
 Een andere instelling, namelijk

9  
10  
11  
12  
13  
14

12.18.1.1 **If 'Wat voor instelling was dit?' is equal to 'Een andere instelling, namelijk' answer this question:**  
Een andere instelling, namelijk

15  
16  
17  
18  
19

12.18.1.2 **If 'Wat voor instelling was dit?' is equal to 'Woon-/zorgcentrum' answer this question:**  
Hoe lang bent u in deze instelling geweest? In het woon-/zorgcentrum:

dagen in de afgelopen 3 maanden

20  
21  
22  
23  
24  
25

12.18.1.3 **If 'Wat voor instelling was dit?' is equal to 'Revalidatiecentrum' answer this question:**  
Hoe lang bent u in deze instelling geweest? In het revalidatiecentrum:

dagen in de afgelopen 3 maanden

26  
27  
28  
29  
30

12.18.1.4 **If 'Wat voor instelling was dit?' is equal to 'Psychiatrische instelling' answer this question:**  
Hoe lang bent u in deze instelling geweest? In de psychiatrische instelling:

dagen in de afgelopen 3 maanden

31  
32  
33  
34  
35

12.18.1.5 **If 'Wat voor instelling was dit?' is equal to 'Een andere instelling, namelijk' answer this question:**  
Hoe lang bent u in deze instelling geweest? In de andere instelling:

dagen in de afgelopen 3 maanden

36  
37  
38  
39  
40

12.19 Heeft u in de afgelopen 3 maanden hulp gekregen van een familielid of een bekende vanwege uw lichamelijke of psychische problemen?

Ja  
 Nee

41  
42  
43  
44  
45  
46  
47  
48  
49  
50  
51  
52  
53  
54  
55  
56  
57  
58  
59  
60

12.19.1 **If 'Heeft u in de afgelopen 3 maanden hulp gekregen van een familielid of een bekende vanwege uw lichamelijke of psychische problemen?' is equal to 'Ja' answer this question:**  
Wat voor hulp van familieleden of bekenden heeft u gehad in de afgelopen 3 maanden?

Huishoudelijke hulp - voorbeeld: stofzuigen, bed opmaken, boodschappen doen, klaarmaken van eten en drinken, verzorgen van kinderen  
 Verzorging van uzelf - voorbeeld: hulp bij douchen of aankleden, hulp bij het eten en drinken of het geven van medicijnen  
 Praktische hulp - voorbeeld: ondersteuning bij wandelen, het maken van uitstapjes of bezoeken aan bekenden, bezoeken aan de huisarts of het ziekenhuis, het regelen van hulp of het regelen van financiële zaken

- 1  
2  
3  
4  
5  
6  
7  
8  
9  
10
- 12.19.1.1 ***If 'Wat voor hulp van familieleden of bekenden heeft u gehad in de afgelopen 3 maanden?' is equal to 'Huishoudelijke hulp - voorbeeld: stofzuigen, bed opmaken, boodschappen doen, klaarmaken van eten en drinken, verzorgen van kinderen' answer this question:***  
Hoeveel weken heeft u deze hulp gehad?  
Huishoudelijke hulp:
- weken in de afgelopen 3 maanden
- 
- 11  
12  
13  
14  
15  
16  
17  
18  
19
- 12.19.1.2 ***If 'Wat voor hulp van familieleden of bekenden heeft u gehad in de afgelopen 3 maanden?' is equal to 'Verzorging van uzelf - voorbeeld: hulp bij douchen of aankleden, hulp bij het eten en drinken of het geven van medicijnen' answer this question:***  
Hoeveel weken heeft u deze hulp gehad? Verzorging van uzelf:
- weken in de afgelopen 3 maanden
- 
- 20  
21  
22  
23  
24  
25  
26  
27  
28  
29  
30  
31
- 12.19.1.3 ***If 'Wat voor hulp van familieleden of bekenden heeft u gehad in de afgelopen 3 maanden?' is equal to 'Praktische hulp - voorbeeld: ondersteuning bij wandelen, het maken van uitstapjes of bezoeken aan bekenden, bezoeken aan de huisarts of het ziekenhuis, het regelen van hulp of het regelen van financiële zaken' answer this question:***  
Hoeveel uur hulp kreeg u in deze weken gemiddeld?  
Praktische hulp:
- weken in de afgelopen 3 maanden
- 
- 32  
33  
34  
35  
36  
37  
38  
39  
40  
41
- 12.19.1.4 ***If 'Wat voor hulp van familieleden of bekenden heeft u gehad in de afgelopen 3 maanden?' is equal to 'Huishoudelijke hulp - voorbeeld: stofzuigen, bed opmaken, boodschappen doen, klaarmaken van eten en drinken, verzorgen van kinderen' answer this question:***  
Hoeveel uur hulp kreeg u in deze weken gemiddeld?  
Huishoudelijke hulp: gemiddeld
- uur in de week
- 
- 42  
43  
44  
45  
46  
47  
48  
49
- 12.19.1.5 ***If 'Wat voor hulp van familieleden of bekenden heeft u gehad in de afgelopen 3 maanden?' is equal to 'Verzorging van uzelf - voorbeeld: hulp bij douchen of aankleden, hulp bij het eten en drinken of het geven van medicijnen' answer this question:***  
Hoeveel uur hulp kreeg u in deze weken gemiddeld?  
Verzorging van uzelf: gemiddeld
- uur in de week
- 
- 50  
51  
52  
53  
54  
55  
56  
57  
58  
59  
60
- 12.19.1.6 ***If 'Wat voor hulp van familieleden of bekenden heeft u gehad in de afgelopen 3 maanden?' is equal to 'Praktische hulp - voorbeeld: ondersteuning bij wandelen, het maken van uitstapjes of bezoeken aan bekenden, bezoeken aan de huisarts of het ziekenhuis, het regelen van hulp of het regelen van financiële zaken' answer this question:***  
Hoeveel uur hulp kreeg u in deze weken gemiddeld?  
Praktische hulp: gemiddeld
- uur in de week

## Vragenlijst PRIMA studie 12 weken - Dank

| Number | Question                                                                                                                                      | Answers                                                                            |
|--------|-----------------------------------------------------------------------------------------------------------------------------------------------|------------------------------------------------------------------------------------|
| 13.1   | Hartelijk dank voor de tijd die u heeft genomen om de vragenlijsten in te vullen. Indien u nog opmerkingen heeft kunt u deze hierin plaatsen. |  |

## Survey 'Vragenlijst PRIMA studie 26 weken'

### Vragenlijst PRIMA studie 26 weken - AOFAS - Pijn

| Number | Question                            | Answers                                                                                                                                                                                                         |
|--------|-------------------------------------|-----------------------------------------------------------------------------------------------------------------------------------------------------------------------------------------------------------------|
| 1.1    | Hoeveel pijn ervaart u aan uw voet? | <input type="checkbox"/> Geen<br><input type="checkbox"/> Milde pijnklachten of af en toe pijn<br><input type="checkbox"/> Matige pijnklachten, dagelijks<br><input type="checkbox"/> Vrijwel continu erge pijn |

### Vragenlijst PRIMA studie 26 weken - AOFAS resterende gedeelte

| Number | Question                                              | Answers                                                                                                                                                                                                                                                                                                                                                                                                                                           |
|--------|-------------------------------------------------------|---------------------------------------------------------------------------------------------------------------------------------------------------------------------------------------------------------------------------------------------------------------------------------------------------------------------------------------------------------------------------------------------------------------------------------------------------|
| 2.1    | Hoeveel beperkingen in het dagelijks leven ervaart u? | <input type="radio"/> Geen beperkingen, geen hulpmiddelen nodig<br><input type="radio"/> Geen beperkingen in algemeen dagelijkse bezigheden, wel beperkingen in recreatieve activiteiten (sport, hobbies, etc) geen ondersteuning<br><input type="radio"/> Beperkingen bij dagelijkse- en recreatieve activiteiten, stok<br><input type="radio"/> Ernstige beperkingen bij dagelijkse- en recreatieactiviteiten, walker, krukken, rolstoel, brace |

- 1  
2  
3  
4  
5  
6  
7  
8
- 
- 2.2 Wat is de afstand die u in één keer kunt lopen?
- Meer dan 600 meter
  - 400 - 600 meter
  - 100 - 300 meter
  - Minder dan 100 meter
- 
- 9  
10  
11  
12  
13  
14  
15  
16
- 2.3 Heeft u moeite met lopen op een bepaalde ondergrond?
- Geen problemen bij lopen
  - Enig problemen op ongelijke ondergrond, trap, helling, ladders
  - Ernstige problemen bij ongelijke ondergrond, trap, helling, ladders
- 
- 17  
18  
19  
20  
21  
22
- 2.4 Hoe zou u uw looppatroon beoordelen?
- Normaal of minimaal afwijkend
  - Duidelijk
  - Ernstig
- 
- 23  
24  
25  
26  
27  
28  
29
- 2.5 Hoe zou u de beweeglijkheid van uw voet beoordelen ten opzichte van de andere zijde of ten opzichte van vóór het ongeval?
- Hetzelfde of licht beperkt t.o.v. de niet aangedane zijde of zoals voor het ongeval
  - Ongeveer de helft beperkt
  - Sterk verminderd, bijna geen bewegingen mogelijk
- 
- 30  
31  
32  
33  
34  
35  
36  
37
- 2.6 Hoe zou u de beweeglijkheid van uw enkel beoordelen ten opzichte van de andere zijde of ten opzichte van voor het ongeval?
- Hetzelfde of licht beperkt t.o.v. de niet aangedane zijde of zoals voor het ongeval
  - Ongeveer de helft beperkt
  - Sterk verminderd, bijna geen bewegingen mogelijk
- 
- 38  
39  
40  
41  
42  
43
- 2.7 Hoe zou u de stabiliteit van uw voet en enkel beoordelen
- Stabiel, ik verzwik mijn enkel hooguit incidenteel
  - Niet stabiel, ik verzwik mijn enkel vaak
- 
- 44  
45  
46  
47  
48  
49  
50  
51  
52  
53  
54  
55  
56  
57  
58  
59  
60
- 2.8 Hoe zou u de stand van uw voet beoordelen ten opzichte van de andere zijde of ten opzichte van voor het ongeval?
- Goed, ik kan mijn voet goed plat op de grond zetten, waarbij de stand niet afwijkend is
  - Ik sta vrijwel alleen op de buitenzijde van mijn voet
  - Ik kan mijn voet niet plat op de grond zetten en loop vrijwel alleen op mijn voorvoet

## Vragenlijst PRIMA studie 26 weken - VAS Pain score

1  
2  
3  
4  
5  
6  
7  
8  
9  
10  
11  
12  
13  
14  
15  
16  
17  
18  
19  
20  
21  
22  
23  
24  
25  
26  
27  
28  
29  
30  
31  
32  
33  
34  
35  
36  
37  
38  
39  
40  
41  
42  
43  
44  
45  
46  
47  
48  
49  
50  
51  
52  
53  
54  
55  
56  
57  
58  
59  
60

| Number | Question                                                                                                                                                             | Answers             |
|--------|----------------------------------------------------------------------------------------------------------------------------------------------------------------------|---------------------|
| 3.1    | VAS pijnscore (Geef uw minimaal pijnscore aan tijdens dagelijkse activiteiten op een schaal van 0 tot 100, waarbij 0 geen pijn is en 100 de ergste pijn denkbaar is) | (0.00) 100 (100.00) |

## Vragenlijst PRIMA studie 26 weken - AAS

| Number | Question | Answers |
|--------|----------|---------|
|--------|----------|---------|

- 1  
2  
3  
4  
5  
6  
7  
8  
9  
10  
11  
12  
13  
14  
15  
16  
17  
18  
19  
20  
21  
22  
23  
24  
25  
26  
27  
28  
29  
30  
31  
32  
33  
34  
35  
36  
37  
38  
39  
40  
41  
42  
43  
44  
45  
46  
47  
48  
49  
50  
51  
52  
53  
54  
55  
56  
57  
58  
59  
60
- 4.1 Wat is het meest bij u van toepassing ten aanzien van uw acitiviteit?
- American Football
  - Basketbal
  - Gymnastiek/turnen
  - Handbal
  - Rugby
  - Voetbal
  - Hockey
  - Korfbal
  - Gevechtssporten: judo, karate, kung fu, taekwando, jiu jitsu, etc.
  - Oriëntatiewandelen
  - Rhythmische gymnastiek
  - Volleybal
  - Boxen
  - Freestyle snowboarden
  - IJshockey
  - Tennis
  - Worstelen
  - Fitness, aerobics
  - Badminton
  - Baseball
  - Cross-country hardlopen
  - Moderne pentathlon
  - Squash
  - Surfen, windsurfen
  - Tafel tennis
  - Atletiek: spring-, werponderdelen
  - Waterskiën
  - Dans
  - Schermen
  - Zaalhockey
  - Bergbeklimmen
  - Langlauf
  - Parachute springen
  - Softball
  - Speciale beroepen en werkactiviteiten; speciale beroepen: ballet, professioneel soldaat, speciale reddingswerker, stuntman, etc.
  - Duiken
  - Scubaduiken
  - Skaten, in-line skaten
  - Atletiek: looponderdelen
  - Triatlon
  - Gewichtsheffen, body-building



1  
2  
3  
4  
5  
6  
7  
8  
9  
10  
11  
12  
13  
14  
15  
16  
17  
18  
19  
20  
21  
22  
23  
24  
25  
26  
27  
28  
29  
30  
31  
32  
33  
34  
35  
36  
37  
38  
39  
40  
41  
42  
43  
44  
45  
46  
47  
48  
49  
50  
51  
52  
53  
54  
55  
56  
57  
58  
59  
60

- Alle competitieve sporten hieronder met 'seasonal' conditioning
- Zwaar fysiek werk
- Alpine skiën en snowboarden
- Bowlen/curlen
- Golf
- Mountainbike/BMX
- Powerliften
- Zeilen
- Fysiek werk
- Wielrennen
- Paardrijden
- Motorsporten/technische sporten
- Roeien, kayakken
- Boogschieten
- Water polo en zwemmen
- Kunnen lopen op oneven grond
- Geen sport, echter geen limitatie in dagelijkse activiteiten
- Kunnen lopen op even grond, maar de dagelijkse activiteiten zijn gelimiteerd
- Niet kunnen lopen, fysieke handicap wegens enkelproblemen

|       |                                                                                                                                                                    |                                                                                                              |
|-------|--------------------------------------------------------------------------------------------------------------------------------------------------------------------|--------------------------------------------------------------------------------------------------------------|
| 4.1.1 | <b><i>If 'Wat is het meest bij u van toepassing ten aanzien van uw acitviteit?' is equal to 'American Football' answer this question:</i></b><br>American Football | <input type="radio"/> Professioneel<br><input type="radio"/> Competitief<br><input type="radio"/> Recreatief |
| 4.1.2 | <b><i>If 'Wat is het meest bij u van toepassing ten aanzien van uw acitviteit?' is equal to 'Basketbal' answer this question:</i></b><br>Basketbal                 | <input type="radio"/> Professioneel<br><input type="radio"/> Competitief<br><input type="radio"/> Recreatief |
| 4.1.3 | <b><i>If 'Wat is het meest bij u van toepassing ten aanzien van uw acitviteit?' is equal to 'Gymnastiek/turnen' answer this question:</i></b><br>Gymnastiek/turnen | <input type="radio"/> Professioneel<br><input type="radio"/> Competitief<br><input type="radio"/> Recreatief |
| 4.1.4 | <b><i>If 'Wat is het meest bij u van toepassing ten aanzien van uw acitviteit?' is equal to 'Handbal' answer this question:</i></b><br>Handbal                     | <input type="radio"/> Professioneel<br><input type="radio"/> Competitief<br><input type="radio"/> Recreatief |
| 4.1.5 | <b><i>If 'Wat is het meest bij u van toepassing ten aanzien van uw acitviteit?' is equal to 'Rugby' answer this question:</i></b><br>Rugby                         | <input type="radio"/> Professioneel<br><input type="radio"/> Competitief<br><input type="radio"/> Recreatief |

|    |        |                                                                                                                                                                                          |                                     |
|----|--------|------------------------------------------------------------------------------------------------------------------------------------------------------------------------------------------|-------------------------------------|
| 1  |        |                                                                                                                                                                                          |                                     |
| 2  | 4.1.6  | <b>If 'Wat is het meest bij u van toepassing ten aanzien van uw acitiviteit?' is equal to 'Voetbal' answer this question:</b>                                                            | <input type="radio"/> Professioneel |
| 3  |        |                                                                                                                                                                                          | <input type="radio"/> Competitief   |
| 4  |        |                                                                                                                                                                                          | <input type="radio"/> Recreatief    |
| 5  |        | Voetbal                                                                                                                                                                                  |                                     |
| 6  |        |                                                                                                                                                                                          |                                     |
| 7  |        |                                                                                                                                                                                          |                                     |
| 8  | 4.1.7  | <b>If 'Wat is het meest bij u van toepassing ten aanzien van uw acitiviteit?' is equal to 'Hockey' answer this question:</b>                                                             | <input type="radio"/> Professioneel |
| 9  |        |                                                                                                                                                                                          | <input type="radio"/> Competitief   |
| 10 |        |                                                                                                                                                                                          | <input type="radio"/> Recreatief    |
| 11 |        | Hockey                                                                                                                                                                                   |                                     |
| 12 |        |                                                                                                                                                                                          |                                     |
| 13 |        |                                                                                                                                                                                          |                                     |
| 14 | 4.1.8  | <b>If 'Wat is het meest bij u van toepassing ten aanzien van uw acitiviteit?' is equal to 'Korfbal' answer this question:</b>                                                            | <input type="radio"/> Professioneel |
| 15 |        |                                                                                                                                                                                          | <input type="radio"/> Competitief   |
| 16 |        |                                                                                                                                                                                          | <input type="radio"/> Recreatief    |
| 17 |        | Korfbal                                                                                                                                                                                  |                                     |
| 18 |        |                                                                                                                                                                                          |                                     |
| 19 |        |                                                                                                                                                                                          |                                     |
| 20 | 4.1.9  | <b>If 'Wat is het meest bij u van toepassing ten aanzien van uw acitiviteit?' is equal to 'Gevechtssporten: judo, karate, kung fu, taekwando, jiu jitsu, etc.' answer this question:</b> | <input type="radio"/> Professioneel |
| 21 |        |                                                                                                                                                                                          | <input type="radio"/> Competitief   |
| 22 |        |                                                                                                                                                                                          | <input type="radio"/> Recreatief    |
| 23 |        | Gevechtssporten: judo, karate, kung fu, taekwando, jiu                                                                                                                                   |                                     |
| 24 |        | jitsu, etc.                                                                                                                                                                              |                                     |
| 25 |        |                                                                                                                                                                                          |                                     |
| 26 |        |                                                                                                                                                                                          |                                     |
| 27 | 4.1.10 | <b>If 'Wat is het meest bij u van toepassing ten aanzien van uw acitiviteit?' is equal to 'Oriëntatielopen' answer this question:</b>                                                    | <input type="radio"/> Professioneel |
| 28 |        |                                                                                                                                                                                          | <input type="radio"/> Competitief   |
| 29 |        |                                                                                                                                                                                          | <input type="radio"/> Recreatief    |
| 30 |        | Oriëntatielopen                                                                                                                                                                          |                                     |
| 31 |        |                                                                                                                                                                                          |                                     |
| 32 |        |                                                                                                                                                                                          |                                     |
| 33 | 4.1.11 | <b>If 'Wat is het meest bij u van toepassing ten aanzien van uw acitiviteit?' is equal to 'Rhythmische gymnastiek' answer this question:</b>                                             | <input type="radio"/> Professioneel |
| 34 |        |                                                                                                                                                                                          | <input type="radio"/> Competitief   |
| 35 |        |                                                                                                                                                                                          | <input type="radio"/> Recreatief    |
| 36 |        | Rhythmisch gymnastiek                                                                                                                                                                    |                                     |
| 37 |        |                                                                                                                                                                                          |                                     |
| 38 |        |                                                                                                                                                                                          |                                     |
| 39 | 4.1.12 | <b>If 'Wat is het meest bij u van toepassing ten aanzien van uw acitiviteit?' is equal to 'Volleybal' answer this question:</b>                                                          | <input type="radio"/> Professioneel |
| 40 |        |                                                                                                                                                                                          | <input type="radio"/> Competitief   |
| 41 |        |                                                                                                                                                                                          | <input type="radio"/> Recreatief    |
| 42 |        | Volleybal                                                                                                                                                                                |                                     |
| 43 |        |                                                                                                                                                                                          |                                     |
| 44 | 4.1.13 | <b>If 'Wat is het meest bij u van toepassing ten aanzien van uw acitiviteit?' is equal to 'Boxen' answer this question:</b>                                                              | <input type="radio"/> Professioneel |
| 45 |        |                                                                                                                                                                                          | <input type="radio"/> Competitief   |
| 46 |        |                                                                                                                                                                                          | <input type="radio"/> Recreatief    |
| 47 |        | Boxen                                                                                                                                                                                    |                                     |
| 48 |        |                                                                                                                                                                                          |                                     |
| 49 |        |                                                                                                                                                                                          |                                     |
| 50 | 4.1.14 | <b>If 'Wat is het meest bij u van toepassing ten aanzien van uw acitiviteit?' is equal to 'Freestyle snowboarden' answer this question:</b>                                              | <input type="radio"/> Professioneel |
| 51 |        |                                                                                                                                                                                          | <input type="radio"/> Competitief   |
| 52 |        |                                                                                                                                                                                          | <input type="radio"/> Recreatief    |
| 53 |        | Freestyle snowboarden                                                                                                                                                                    |                                     |
| 54 |        |                                                                                                                                                                                          |                                     |
| 55 |        |                                                                                                                                                                                          |                                     |
| 56 | 4.1.15 | <b>If 'Wat is het meest bij u van toepassing ten aanzien van uw acitiviteit?' is equal to 'Freestyle snowboarden' answer this question:</b>                                              | <input type="radio"/> Professioneel |
| 57 |        |                                                                                                                                                                                          | <input type="radio"/> Competitief   |
| 58 |        |                                                                                                                                                                                          | <input type="radio"/> Recreatief    |
| 59 |        | IJshockey                                                                                                                                                                                |                                     |
| 60 |        |                                                                                                                                                                                          |                                     |

- 1  
2  
3  
4  
5  
6  
7
- 4.1.16 **If 'Wat is het meest bij u van toepassing ten aanzien van uw acitiviteit?' is equal to 'Tennis' answer this question:**  
Tennis  Professioneel  
 Competitief  
 Recreatief
- 8  
9  
10  
11  
12
- 4.1.17 **If 'Wat is het meest bij u van toepassing ten aanzien van uw acitiviteit?' is equal to 'Worstelen' answer this question:**  
Worstelen  Professioneel  
 Competitief  
 Recreatief
- 13  
14  
15  
16  
17  
18
- 4.1.18 **If 'Wat is het meest bij u van toepassing ten aanzien van uw acitiviteit?' is equal to 'Fitness, aerobics' answer this question:**  
Fitness, aerobics  Professioneel  
 Competitief  
 Recreatief
- 19  
20  
21  
22  
23  
24
- 4.1.19 **If 'Wat is het meest bij u van toepassing ten aanzien van uw acitiviteit?' is equal to 'Badminton' answer this question:**  
Badminton  Professioneel  
 Competitief  
 Recreatief
- 25  
26  
27  
28  
29  
30
- 4.1.20 **If 'Wat is het meest bij u van toepassing ten aanzien van uw acitiviteit?' is equal to 'Baseball' answer this question:**  
Baseball  Professioneel  
 Competitief  
 Recreatief
- 31  
32  
33  
34  
35
- 4.1.21 **If 'Wat is het meest bij u van toepassing ten aanzien van uw acitiviteit?' is equal to 'Cross-country hardlopen' answer this question:**  
Cross-country hardlopen  Professioneel  
 Competitief  
 Recreatief
- 36  
37  
38  
39  
40  
41
- 4.1.22 **If 'Wat is het meest bij u van toepassing ten aanzien van uw acitiviteit?' is equal to 'Moderne pentathlon' answer this question:**  
Moderne pentathlon  Professioneel  
 Competitief  
 Recreatief
- 42  
43  
44  
45  
46  
47
- 4.1.23 **If 'Wat is het meest bij u van toepassing ten aanzien van uw acitiviteit?' is equal to 'Squash' answer this question:**  
Squash  Professioneel  
 Competitief  
 Recreatief
- 48  
49  
50  
51  
52  
53
- 4.1.24 **If 'Wat is het meest bij u van toepassing ten aanzien van uw acitiviteit?' is equal to 'Surfen, windsurfen' answer this question:**  
Surfen, windsurfen  Professioneel  
 Competitief  
 Recreatief
- 54  
55  
56  
57  
58  
59  
60
- 4.1.25 **If 'Wat is het meest bij u van toepassing ten aanzien van uw acitiviteit?' is equal to 'Tafel tennis' answer this question:**  
Tafel tennis  Professioneel  
 Competitief  
 Recreatief

- 1  
2  
3  
4  
5  
6  
7
- 
- 4.1.26 **If 'Wat is het meest bij u van toepassing ten aanzien van uw acitiviteit?' is equal to 'Atletiek: spring-, werponderdelen' answer this question:**  
Atletiek: spring-, werponderdelen
- Professioneel  
 Competitief  
 Recreatief
- 
- 8  
9  
10  
11  
12
- 4.1.27 **If 'Wat is het meest bij u van toepassing ten aanzien van uw acitiviteit?' is equal to 'Waterskieën' answer this question:**  
Waterskien
- Professioneel  
 Competitief  
 Recreatief
- 
- 13  
14  
15  
16  
17  
18
- 4.1.28 **If 'Wat is het meest bij u van toepassing ten aanzien van uw acitiviteit?' is equal to 'Dans' answer this question:**  
Dans
- Professioneel  
 Competitief  
 Recreatief
- 
- 19  
20  
21  
22  
23  
24
- 4.1.29 **If 'Wat is het meest bij u van toepassing ten aanzien van uw acitiviteit?' is equal to 'Schermen' answer this question:**  
Schermen
- Professioneel  
 Competitief  
 Recreatief
- 
- 25  
26  
27  
28  
29  
30
- 4.1.30 **If 'Wat is het meest bij u van toepassing ten aanzien van uw acitiviteit?' is equal to 'Zaalhockey' answer this question:**  
Zaalhockey
- Professioneel  
 Competitief  
 Recreatief
- 
- 31  
32  
33  
34  
35
- 4.1.31 **If 'Wat is het meest bij u van toepassing ten aanzien van uw acitiviteit?' is equal to 'Bergbeklimmen' answer this question:**  
Bergbeklimmen
- Professioneel  
 Competitief  
 Recreatief
- 
- 36  
37  
38  
39  
40  
41
- 4.1.32 **If 'Wat is het meest bij u van toepassing ten aanzien van uw acitiviteit?' is equal to 'Langlauf' answer this question:**  
Langlauf
- Professioneel  
 Competitief  
 Recreatief
- 
- 42  
43  
44  
45  
46  
47
- 4.1.33 **If 'Wat is het meest bij u van toepassing ten aanzien van uw acitiviteit?' is equal to 'Parachute springen' answer this question:**  
Parachute springen
- Professioneel  
 Competitief  
 Recreatief
- 
- 48  
49  
50  
51  
52  
53  
54  
55  
56  
57  
58  
59  
60
- 4.1.34 **If 'Wat is het meest bij u van toepassing ten aanzien van uw acitiviteit?' is equal to 'Softball' answer this question:**  
Softball
- Professioneel  
 Competitief  
 Recreatief

- 1  
2  
3  
4  
5  
6  
7  
8  
9  
10  
11  
12
- 4.1.35 ***If 'Wat is het meest bij u van toepassing ten aanzien van uw activiteit?' is equal to 'Speciale beroepen en werkactiviteiten; speciale beroepen: ballet, professioneel soldaat, speciale reddingswerker, stuntman, etc.' answer this question:***  
Speciale beroepen en werkactiviteiten speciale beroepen: ballet, professioneel soldaat, speciale reddingswerker, stuntman, etc.
- ballet, professioneel soldaat, speciale reddingswerker, stuntman, etc.
- 
- 13  
14  
15  
16  
17
- 4.1.36 ***If 'Wat is het meest bij u van toepassing ten aanzien van uw activiteit?' is equal to 'Duiken' answer this question:***  
Duiken
- Professioneel/competitief  
 Recreatief
- 
- 18  
19  
20  
21  
22
- 4.1.37 ***If 'Wat is het meest bij u van toepassing ten aanzien van uw activiteit?' is equal to 'Scubaduiken' answer this question:***  
Scubaduiken
- Professioneel/competitief  
 Recreatief
- 
- 23  
24  
25  
26  
27  
28
- 4.1.38 ***If 'Wat is het meest bij u van toepassing ten aanzien van uw activiteit?' is equal to 'Skaten, in-line skaten' answer this question:***  
skaten, in-linen skaten
- Professioneel/competitief  
 Recreatief
- 
- 29  
30  
31  
32  
33
- 4.1.39 ***If 'Wat is het meest bij u van toepassing ten aanzien van uw activiteit?' is equal to 'Atletiek: looponderdelen' answer this question:***  
Atletiek: looponderdelen
- Professioneel/competitief  
 Recreatief
- 
- 34  
35  
36  
37  
38
- 4.1.40 ***If 'Wat is het meest bij u van toepassing ten aanzien van uw activiteit?' is equal to 'Triatlon' answer this question:***  
triatlon
- Professioneel/competitief  
 Recreatief
- 
- 39  
40  
41  
42  
43  
44  
45
- 4.1.41 ***If 'Wat is het meest bij u van toepassing ten aanzien van uw activiteit?' is equal to 'Gewichtsheffen, body-building' answer this question:***  
Gewichtsheffen, body-building
- Professioneel/competitief  
 Recreatief
- 
- 46  
47  
48  
49  
50  
51  
52
- 4.1.42 ***If 'Wat is het meest bij u van toepassing ten aanzien van uw activiteit?' is equal to 'Alle competitieve sporten hieronder met 'seasonal' conditioning' answer this question:***  
Alle competitieve sporten hieronder met 'seasonal' conditioning
- Alle competitieve sporten hieronder met 'seasonal' conditioning
- 
- 53  
54  
55  
56  
57  
58  
59  
60
- 4.1.43 ***If 'Wat is het meest bij u van toepassing ten aanzien van uw activiteit?' is equal to 'Zwaar fysiek werk' answer this question:***  
Zwaar fysiek werk
- Alle competitieve sporten hieronder met 'seasonal' conditioning

- 1  
2  
3  
4  
5  
6
- 
- 4.1.44 **If 'Wat is het meest bij u van toepassing ten aanzien van uw acitiviteit?' is equal to 'Alpine skiën en snowboarden' answer this question:**  
Alpine skien en snowboarden  Alpine skien en snowboarden
- 
- 7  
8  
9  
10  
11  
12
- 4.1.45 **If 'Wat is het meest bij u van toepassing ten aanzien van uw acitiviteit?' is equal to 'Bowlen/curlen' answer this question:**  
Bowlen/curlen  Bowlen/curlen
- 
- 13  
14  
15  
16  
17
- 4.1.46 **If 'Wat is het meest bij u van toepassing ten aanzien van uw acitiviteit?' is equal to 'Golf' answer this question:**  
Golf  Golf
- 
- 18  
19  
20  
21  
22
- 4.1.47 **If 'Wat is het meest bij u van toepassing ten aanzien van uw acitiviteit?' is equal to 'Mountainbike/BMX' answer this question:**  
Mountainbike/BMX  Mountainbike/BMX
- 
- 23  
24  
25  
26  
27  
28
- 4.1.48 **If 'Wat is het meest bij u van toepassing ten aanzien van uw acitiviteit?' is equal to 'Powerliften' answer this question:**  
Powerliften  Powerliften
- 
- 29  
30  
31  
32  
33
- 4.1.49 **If 'Wat is het meest bij u van toepassing ten aanzien van uw acitiviteit?' is equal to 'Zeilen' answer this question:**  
Zeilen  Zeilen
- 
- 34  
35  
36  
37  
38
- 4.1.50 **If 'Wat is het meest bij u van toepassing ten aanzien van uw acitiviteit?' is equal to 'Fysiek werk' answer this question:**  
Fysiek werk  Fysiek werk
- 
- 39  
40  
41  
42  
43  
44
- 4.1.51 **If 'Wat is het meest bij u van toepassing ten aanzien van uw acitiviteit?' is equal to 'Wielrennen' answer this question:**  
Wielrennen  Wielrennen
- 
- 45  
46  
47  
48  
49
- 4.1.52 **If 'Wat is het meest bij u van toepassing ten aanzien van uw acitiviteit?' is equal to 'Paardrijden' answer this question:**  
Paardrijden  Paardrijden
- 
- 50  
51  
52  
53  
54  
55
- 4.1.53 **If 'Wat is het meest bij u van toepassing ten aanzien van uw acitiviteit?' is equal to 'Motorsporten/technische sporten' answer this question:**  
Motorsporten/technische sporten  Motorsporten/technische sporten
- 
- 56  
57  
58  
59  
60
- 4.1.54 **If 'Wat is het meest bij u van toepassing ten aanzien van uw acitiviteit?' is equal to 'Roeien, kayakken' answer this question:**  
Roeien, kayakken  Roeien, kayakken

|        |                                                                                                                                                                                                                                                                                    |                                                                                                    |
|--------|------------------------------------------------------------------------------------------------------------------------------------------------------------------------------------------------------------------------------------------------------------------------------------|----------------------------------------------------------------------------------------------------|
| 4.1.55 | <b>If 'Wat is het meest bij u van toepassing ten aanzien van uw acitiviteit?' is equal to 'Boogschieten' answer this question:</b><br>Boogschieten                                                                                                                                 | <input type="radio"/> Boogschieten                                                                 |
| 4.1.56 | <b>If 'Wat is het meest bij u van toepassing ten aanzien van uw acitiviteit?' is equal to 'Water polo en zwemmen' answer this question:</b><br>Water polo en zwemmen                                                                                                               | <input type="radio"/> Water polo en zwemmen                                                        |
| 4.1.57 | <b>If 'Wat is het meest bij u van toepassing ten aanzien van uw acitiviteit?' is equal to 'Kunnen lopen op oneven grond' answer this question:</b><br>Kunnen lopen op oneven grond                                                                                                 | <input type="radio"/> Kunnen lopen op oneven grond                                                 |
| 4.1.58 | <b>If 'Wat is het meest bij u van toepassing ten aanzien van uw acitiviteit?' is equal to 'Geen sport, echter geen limitatie in dagelijkse activiteiten' answer this question:</b><br>Geen sport, echter geen limitatie in dagelijkse activiteiten                                 | <input type="radio"/> Geen sport, echter geen limitatie in dagelijkse activiteiten                 |
| 4.1.59 | <b>If 'Wat is het meest bij u van toepassing ten aanzien van uw acitiviteit?' is equal to 'Kunnen lopen op even grond, maar de dagelijkse activiteiten zijn gelimiteerd' answer this question:</b><br>Kunnen lopen op even grond, maar de dagelijkse activiteiten zijn gelimiteerd | <input type="radio"/> Kunnen lopen op even grond, maar de dagelijkse activiteiten zijn gelimiteerd |
| 4.1.60 | <b>If 'Wat is het meest bij u van toepassing ten aanzien van uw acitiviteit?' is equal to 'Niet kunnen lopen, fysieke handicap wegens enkelproblemen' answer this question:</b><br>Niet kunnen lopen, fysieke handicap wegens enkelproblemen                                       | <input type="radio"/> Niet kunnen lopen, fysieke handicap wegens enkelproblemen                    |

## Vragenlijst PRIMA studie 26 weken - Hoe tevreden bent u over de enkelklachten?

| Number | Question                                   | Answers                                                                                                                       |
|--------|--------------------------------------------|-------------------------------------------------------------------------------------------------------------------------------|
| 5.1    | Hoe tevreden bent u over de enkelklachten? | <input type="radio"/> Slecht<br><input type="radio"/> Matig<br><input type="radio"/> Goed<br><input type="radio"/> Uitstekend |

## Vragenlijst PRIMA studie 26 weken - SF-36

| Number | Question                                                                                                                                                                                                                                                                                                                                                           | Answers                                                                                                                                                                                                                                                                                                                                                                 |
|--------|--------------------------------------------------------------------------------------------------------------------------------------------------------------------------------------------------------------------------------------------------------------------------------------------------------------------------------------------------------------------|-------------------------------------------------------------------------------------------------------------------------------------------------------------------------------------------------------------------------------------------------------------------------------------------------------------------------------------------------------------------------|
|        | Deze vragenlijst gaat over uw standpunten t.a.v. uw gezondheid. Met behulp van deze gegevens kan worden bijgehouden hoe u zich voelt en hoe goed u in staat bent uw gebruikelijke bezigheden uit te voeren. Beantwoord elke vraag door een antwoord aan te klikken. Als u niet zeker weet hoe u een vraag moet beantwoorden, geef dan het best mogelijke antwoord. |                                                                                                                                                                                                                                                                                                                                                                         |
| 6.1    | Hoe zou u over het algemeen uw gezondheid noemen?                                                                                                                                                                                                                                                                                                                  | <input type="radio"/> Uitstekend <input type="radio"/> Zeer goed <input type="radio"/><br><input type="radio"/> Goed <input type="radio"/> Matig <input type="radio"/> Slecht                                                                                                                                                                                           |
| 6.2    | Hoe beoordeelt u nu uw gezondheid over het algemeen vergeleken met een jaar geleden?                                                                                                                                                                                                                                                                               | <input type="radio"/> Veel beter dan een jaar geleden <input type="radio"/><br><input type="radio"/> Wat beter dan een jaar geleden <input type="radio"/><br><input type="radio"/> Ongeveer hetzelfde als een jaar geleden<br><input type="radio"/> Wat slechter dan een jaar geleden <input type="radio"/><br><input type="radio"/> Veel slechter dan een jaar geleden |
| 6.3    | Wordt u door uw gezondheid op dit moment beperkt bij forse inspanning, zoals hardlopen, tillen van zware voorwerpen of een veeleisende sport beoefenen?                                                                                                                                                                                                            | <input type="radio"/> Ja, ernstig beperkt <input type="radio"/> Ja, een beetje beperkt <input type="radio"/> Nee, helemaal niet beperkt                                                                                                                                                                                                                                 |
| 6.4    | Wordt u door uw gezondheid op dit moment beperkt bij matige inspanning zoals een tafel verplaatsen, stofzuigen, zwemmen of fietsen?                                                                                                                                                                                                                                | <input type="radio"/> Ja, ernstig beperkt <input type="radio"/> Ja, een beetje beperkt <input type="radio"/> Nee, helemaal niet beperkt                                                                                                                                                                                                                                 |
| 6.5    | Wordt u door uw gezondheid op dit moment beperkt bij boodschappen tillen of dragen?                                                                                                                                                                                                                                                                                | <input type="radio"/> Ja, ernstig beperkt <input type="radio"/> Ja, een beetje beperkt <input type="radio"/> Nee, helemaal niet beperkt                                                                                                                                                                                                                                 |
| 6.6    | Wordt u door uw gezondheid op dit moment beperkt bij een paar trappen oplopen?                                                                                                                                                                                                                                                                                     | <input type="radio"/> Ja, ernstig beperkt <input type="radio"/> Ja, een beetje beperkt <input type="radio"/> Nee, helemaal niet beperkt                                                                                                                                                                                                                                 |
| 6.7    | Wordt u door uw gezondheid op dit moment beperkt bij één trap oplopen?                                                                                                                                                                                                                                                                                             | <input type="radio"/> Ja, ernstig beperkt <input type="radio"/> Ja, een beetje beperkt <input type="radio"/> Nee, helemaal niet beperkt                                                                                                                                                                                                                                 |
| 6.8    | Wordt u door uw gezondheid op dit moment beperkt bij bukken, knielen of hurken?                                                                                                                                                                                                                                                                                    | <input type="radio"/> Ja, ernstig beperkt <input type="radio"/> Ja, een beetje beperkt <input type="radio"/> Nee, helemaal niet beperkt                                                                                                                                                                                                                                 |
| 6.9    | Wordt u door uw gezondheid op dit moment beperkt bij meer dan één kilometer lopen?                                                                                                                                                                                                                                                                                 | <input type="radio"/> Ja, ernstig beperkt <input type="radio"/> Ja, een beetje beperkt <input type="radio"/> Nee, helemaal niet beperkt                                                                                                                                                                                                                                 |
| 6.10   | Wordt u door uw gezondheid op dit moment beperkt bij een paar honderd meter lopen?                                                                                                                                                                                                                                                                                 | <input type="radio"/> Ja, ernstig beperkt <input type="radio"/> Ja, een beetje beperkt <input type="radio"/> Nee, helemaal niet beperkt                                                                                                                                                                                                                                 |



- 1  
2  
3  
4  
5  
6  
7  
8  
9  
10  
11  
12  
13  
14  
15  
16  
17  
18  
19  
20  
21  
22  
23  
24  
25  
26  
27  
28  
29  
30  
31  
32  
33  
34  
35  
36  
37  
38  
39  
40  
41  
42  
43  
44  
45  
46  
47  
48  
49  
50  
51  
52  
53  
54  
55  
56  
57  
58  
59  
60
- 
- 6.11 Wordt u door uw gezondheid op dit moment beperkt bij ongeveer honderd meter lopen?  Ja, ernstig beperkt  Ja, een beetje beperkt  Nee, helemaal niet beperkt
- 
- 6.12 Wordt u door uw gezondheid op dit moment beperkt bij uzelf wassen of aankleden?  Ja, ernstig beperkt  Ja, een beetje beperkt  Nee, helemaal niet beperkt
- 
- 6.13 U besteedde in de afgelopen 4 weken minder tijd aan werk of andere bezigheden  Ja  Nee
- 
- 6.14 U heeft in de afgelopen 4 weken minder bereikt dan u zou willen  Ja  Nee
- 
- 6.15 U was in de afgelopen 4 weken beperkt in het soort werk of andere bezigheden.  Ja  Nee
- 
- 6.16 U had de afgelopen 4 weken moeite om uw werk of andere bezigheden uit te voeren (het kostte u bijvoorbeeld extra inspanning).  Ja  Nee
- 
- 6.17 U besteedde in de afgelopen 4 weken minder tijd aan werk of andere bezigheden ten gevolge van emotionele problemen  Ja  Nee
- 
- 6.18 U heeft in de afgelopen 4 weken minder bereikt dan u zou willen ten gevolge van emotionele problemen.  Ja  Nee
- 
- 6.19 U deed de afgelopen 4 weken uw werk of andere bezigheden niet zo zorgvuldig als gewoonlijk ten gevolge van emotionele problemen.  Ja  Nee
- 
- 6.20 In hoeverre hebben uw lichamelijke gezondheid of emotionele problemen u gedurende de afgelopen 4 weken gehinderd in uw normale omgang met familie, vrienden of burens, of bij activiteiten in groepsverband?  Helemaal niet  Enigszins  Nogal  Veel  Heel erg veel
- 
- 6.21 Hoeveel lichamelijke pijn heeft u de afgelopen 4 weken gehad?  Geen  Heel licht  Licht  Nogal  Ernstig  Heel ernstig
- 
- 6.22 In welke mate bent u de afgelopen 4 weken door de pijn gehinderd in uw normale werk (zowel werk buitenshuis als huishoudelijk werk)?  Helemaal niet  Een klein beetje  Nogal  Veel  Heel erg veel

1  
2 6.23 Voelde u zich levenslustig?  Altijd  
3  Meestal  
4  Vaak  
5  Soms  
6  Zelden  
7  Nooit

11  
12 6.24 Was u erg zenuwachtig?  Altijd  
13  Meestal  
14  Vaak  
15  Soms  
16  Zelden  
17  Nooit

21  
22 6.25 Zat u zo in de put dat u niets kon?  Altijd  
23  Meestal  
24  Vaak  
25  Soms  
26  Zelden  
27  Nooit

31  
32 6.26 Voelde u zich rustig en tevreden?  Altijd  
33  Meestal  
34  Vaak  
35  Soms  
36  Zelden  
37  Nooit

41  
42 6.27 Had u veel energie?  Altijd  
43  Meestal  
44  Vaak  
45  Soms  
46  Zelden  
47  Nooit

51  
52 6.28 Voelde u zich somber en neerslachtig?  Altijd  
53  Meestal  
54  Vaak  
55  Soms  
56  Zelden  
57  Nooit

1  
2  
3  
4  
5  
6  
7  
8  
9  
10  
11  
12  
13  
14  
15  
16  
17  
18  
19  
20  
21  
22  
23  
24  
25  
26  
27  
28  
29  
30  
31  
32  
33  
34  
35  
36  
37  
38  
39  
40  
41  
42  
43  
44  
45  
46  
47  
48  
49  
50  
51  
52  
53  
54  
55  
56  
57  
58  
59  
60

---

|      |                         |                                                                                                                                                                                          |
|------|-------------------------|------------------------------------------------------------------------------------------------------------------------------------------------------------------------------------------|
| 6.29 | Voelde u zich uitgeput? | <input type="radio"/> Altijd<br><input type="radio"/> Meestal<br><input type="radio"/> Vaak<br><input type="radio"/> Soms<br><input type="radio"/> Zelden<br><input type="radio"/> Nooit |
|------|-------------------------|------------------------------------------------------------------------------------------------------------------------------------------------------------------------------------------|

---

|      |                          |                                                                                                                                                                                          |
|------|--------------------------|------------------------------------------------------------------------------------------------------------------------------------------------------------------------------------------|
| 6.30 | Was u een gelukkig mens? | <input type="radio"/> Altijd<br><input type="radio"/> Meestal<br><input type="radio"/> Vaak<br><input type="radio"/> Soms<br><input type="radio"/> Zelden<br><input type="radio"/> Nooit |
|------|--------------------------|------------------------------------------------------------------------------------------------------------------------------------------------------------------------------------------|

---

|      |                    |                                                                                                                                                                                          |
|------|--------------------|------------------------------------------------------------------------------------------------------------------------------------------------------------------------------------------|
| 6.31 | Voelde u zich moe? | <input type="radio"/> Altijd<br><input type="radio"/> Meestal<br><input type="radio"/> Vaak<br><input type="radio"/> Soms<br><input type="radio"/> Zelden<br><input type="radio"/> Nooit |
|------|--------------------|------------------------------------------------------------------------------------------------------------------------------------------------------------------------------------------|

---

|      |                                                                                                                                                                                      |                                                                                                                                                            |
|------|--------------------------------------------------------------------------------------------------------------------------------------------------------------------------------------|------------------------------------------------------------------------------------------------------------------------------------------------------------|
| 6.32 | Hoe vaak hebben uw lichamelijke gezondheid of emotionele problemen u gedurende de afgelopen 4 weken gehinderd bij uw sociale activiteiten (zoals vrienden of familie bezoeken etc.)? | <input type="radio"/> Altijd<br><input type="radio"/> Meestal<br><input type="radio"/> Soms<br><input type="radio"/> Zelden<br><input type="radio"/> Nooit |
|------|--------------------------------------------------------------------------------------------------------------------------------------------------------------------------------------|------------------------------------------------------------------------------------------------------------------------------------------------------------|

---

|      |                                                            |                                                                                                                                                                                                              |
|------|------------------------------------------------------------|--------------------------------------------------------------------------------------------------------------------------------------------------------------------------------------------------------------|
| 6.33 | Ik lijk wat gemakkelijker ziek te worden dan andere mensen | <input type="radio"/> Volkomen juist<br><input type="radio"/> Grotendeels juist<br><input type="radio"/> Weet ik niet<br><input type="radio"/> Grotendeels onjuist<br><input type="radio"/> Volkomen onjuist |
|------|------------------------------------------------------------|--------------------------------------------------------------------------------------------------------------------------------------------------------------------------------------------------------------|

---

|      |                                                 |                                                                                                                                                                                                              |
|------|-------------------------------------------------|--------------------------------------------------------------------------------------------------------------------------------------------------------------------------------------------------------------|
| 6.34 | Ik ben even gezond als andere mensen die ik ken | <input type="radio"/> Volkomen juist<br><input type="radio"/> Grotendeels juist<br><input type="radio"/> Weet ik niet<br><input type="radio"/> Grotendeels onjuist<br><input type="radio"/> Volkomen onjuist |
|------|-------------------------------------------------|--------------------------------------------------------------------------------------------------------------------------------------------------------------------------------------------------------------|

- 1  
2  
3  
4  
5  
6  
7  
8  
9
- 
- 6.35 Ik verwacht dat mijn gezondheid achteruit zal gaan
- Volkomen juist
  - Grotendeels juist
  - Weet ik niet
  - Grotendeels onjuist
  - Volkomen onjuist
- 

- 10  
11  
12  
13  
14  
15  
16  
17  
18  
19  
20  
21  
22
- 6.36 Mijn gezondheid is uitstekend
- Volkomen juist
  - Grotendeels juist
  - Weet ik niet
  - Grotendeels onjuist
  - Volkomen onjuist

## Vragenlijst PRIMA studie 26 weken - GAS

| Number | Question                                                                                                                                                                                  | Answers                                                                                                                                                                                                                                                                                                                                                              |
|--------|-------------------------------------------------------------------------------------------------------------------------------------------------------------------------------------------|----------------------------------------------------------------------------------------------------------------------------------------------------------------------------------------------------------------------------------------------------------------------------------------------------------------------------------------------------------------------|
|        | Tijdens de eerste afspraak werd een duidelijk doel met u afgesproken. Dit werd tevens per email naar u gestuurd. Hoe is de situatie nu ten aanzien van de destijds gestelde doelstelling? |                                                                                                                                                                                                                                                                                                                                                                      |
| 7.1    | Wat is nu de situatie ten aanzien van het tijdens de eerste afspraak afgesproken doelstelling (Goal attainment Scaling)?                                                                  | <ul style="list-style-type: none"> <li><input type="radio"/> Achteruitgang (minder dan de uitgangssituatie)</li> <li><input type="radio"/> Uitgangssituatie</li> <li><input type="radio"/> Minder dan het doel</li> <li><input type="radio"/> Doel</li> <li><input type="radio"/> Meer dan het doel</li> <li><input type="radio"/> Veel meer dan het doel</li> </ul> |

## Vragenlijst PRIMA studie 26 weken - EQ-5D-3L

| Number | Question                                                                                                                                                                                                                                                                                                                                                           | Answers                                                                                                                                                                                                                  |
|--------|--------------------------------------------------------------------------------------------------------------------------------------------------------------------------------------------------------------------------------------------------------------------------------------------------------------------------------------------------------------------|--------------------------------------------------------------------------------------------------------------------------------------------------------------------------------------------------------------------------|
|        | Deze vragenlijst gaat over uw standpunten t.a.v. uw gezondheid. Met behulp van deze gegevens kan worden bijgehouden hoe u zich voelt en hoe goed u in staat bent uw gebruikelijke bezigheden uit te voeren. Beantwoord elke vraag door een antwoord aan te klikken. Als u niet zeker weet hoe u een vraag moet beantwoorden, geef dan het best mogelijke antwoord. |                                                                                                                                                                                                                          |
| 8.1    | Hoe is het met uw Mobiliteit gesteld?                                                                                                                                                                                                                                                                                                                              | <ul style="list-style-type: none"> <li><input type="radio"/> Ik heb geen problemen met lopen</li> <li><input type="radio"/> Ik heb enige problemen met lopen</li> <li><input type="radio"/> Ik ben bedlegerig</li> </ul> |

|                                                                                                                                                                                                                                     |                                                                                                                  |                                                                                                                                                                                                                                                             |
|-------------------------------------------------------------------------------------------------------------------------------------------------------------------------------------------------------------------------------------|------------------------------------------------------------------------------------------------------------------|-------------------------------------------------------------------------------------------------------------------------------------------------------------------------------------------------------------------------------------------------------------|
| 8.2                                                                                                                                                                                                                                 | Hoe is het met uw Zelfzorg gesteld?                                                                              | <input type="radio"/> Ik heb geen problemen om mijzelf te wassen of aan te kleden<br><input type="radio"/> Ik heb enige problemen om mijzelf te wassen of aan te kleden<br><input type="radio"/> Ik ben niet in staat om mijzelf te wassen of aan te kleden |
| 8.3                                                                                                                                                                                                                                 | Hoe is het met de Dagelijkse activiteiten (werk, studie, huishouden, gezins- en vrijetijdsactiviteiten) gesteld? | <input type="radio"/> Ik heb geen problemen met mijn dagelijkse activiteiten<br><input type="radio"/> Ik heb enige problemen met mijn dagelijkse activiteiten<br><input type="radio"/> Ik ben niet in staat om mijn dagelijkse activiteiten uit te voeren   |
| 8.4                                                                                                                                                                                                                                 | Hoe is het met de Pijn/klachten gesteld?                                                                         | <input type="radio"/> Ik heb geen pijn of andere klachten<br><input type="radio"/> Ik heb matige pijn of andere klachten<br><input type="radio"/> Ik heb zeer ernstige pijn of andere klachten                                                              |
| 8.5                                                                                                                                                                                                                                 | Hoe is het met de Stemming gesteld?                                                                              | <input type="radio"/> Ik ben niet angstig of somber<br><input type="radio"/> Ik ben matig angstig of somber<br><input type="radio"/> Ik ben erg angstig of somber                                                                                           |
| We willen weten hoe goed of slecht uw gezondheid VANDAAG is. Deze meetschaal loopt van 0 tot 100: 100 staat voor de BESTE gezondheid die u zich kunt voorstellen - 0 staat voor de SLECHTSTE gezondheid die u zich kunt voorstellen |                                                                                                                  |                                                                                                                                                                                                                                                             |
| 8.6                                                                                                                                                                                                                                 | Uw Gezondheid vandaag                                                                                            | (0.00) (100.00)                                                                                                                                                                                                                                             |

## Vragenlijst PRIMA studie 26 weken - AOS

| Number                                                                                                                                                                                                                                                                                                                                                                                                               | Question                                                   | Answers                                                                                            |
|----------------------------------------------------------------------------------------------------------------------------------------------------------------------------------------------------------------------------------------------------------------------------------------------------------------------------------------------------------------------------------------------------------------------|------------------------------------------------------------|----------------------------------------------------------------------------------------------------|
| <p>Instructies: De lijn naast elke vraag staat voor hoeveel PIJN u heeft in verschillende situaties. De linker kant (0) is "geen pijn" en de rechter kant (100) is "ergste pijn denkbaar". Geef voor de onderstaande situaties op de lijn aan hoeveel PIJN u in de afgelopen week in de enkel had. Als een of meerdere van deze situaties niet van toepassing waren, dan kiest u de "niet van toepassing" optie.</p> |                                                            |                                                                                                    |
| 9.1                                                                                                                                                                                                                                                                                                                                                                                                                  | Wat was de hoogte van de ergste pijn in de afgelopen week? | (0.00) (100.00)                                                                                    |
| 9.2                                                                                                                                                                                                                                                                                                                                                                                                                  | Heeft u pijn als u 's ochtends opstaat?                    | <input type="radio"/> Ja<br><input type="radio"/> Nee<br><input type="radio"/> Niet van toepassing |

|    |       |                                                                                                                     |                                           |
|----|-------|---------------------------------------------------------------------------------------------------------------------|-------------------------------------------|
| 1  |       |                                                                                                                     |                                           |
| 2  | 9.2.1 | <b><i>If 'Heeft u pijn als u 's ochtends opstaat?' is equal to 'Ja' answer this question:</i></b>                   | (0.00) (100.00)                           |
| 3  |       | Hoeveel pijn heeft u voordat u 's ochtends opstaat?                                                                 |                                           |
| 4  |       |                                                                                                                     |                                           |
| 5  |       |                                                                                                                     |                                           |
| 6  | 9.3   | Heeft u pijn wanneer u op blote voeten loopt?                                                                       | <input type="radio"/> Ja                  |
| 7  |       |                                                                                                                     | <input type="radio"/> Nee                 |
| 8  |       |                                                                                                                     | <input type="radio"/> Niet van toepassing |
| 9  |       |                                                                                                                     |                                           |
| 10 |       |                                                                                                                     |                                           |
| 11 |       |                                                                                                                     |                                           |
| 12 | 9.3.1 | <b><i>If 'Heeft u pijn wanneer u op blote voeten loopt?' is equal to 'Ja' answer this question:</i></b>             | (0.00) (100.00)                           |
| 13 |       | Hoeveel pijn heeft u als u op blote voeten loopt?                                                                   |                                           |
| 14 |       |                                                                                                                     |                                           |
| 15 |       |                                                                                                                     |                                           |
| 16 | 9.4   | Heeft u pijn wanneer u op blote voeten staat?                                                                       | <input type="radio"/> Ja                  |
| 17 |       |                                                                                                                     | <input type="radio"/> Nee                 |
| 18 |       |                                                                                                                     | <input type="radio"/> Niet van toepassing |
| 19 |       |                                                                                                                     |                                           |
| 20 |       |                                                                                                                     |                                           |
| 21 |       |                                                                                                                     |                                           |
| 22 | 9.4.1 | <b><i>If 'Heeft u pijn wanneer u op blote voeten staat?' is equal to 'Ja' answer this question:</i></b>             | (0.00) (100.00)                           |
| 23 |       | Hoeveel pijn heeft u als u op blote voeten staat?                                                                   |                                           |
| 24 |       |                                                                                                                     |                                           |
| 25 |       |                                                                                                                     |                                           |
| 26 | 9.5   | Heeft u pijn wanneer u met schoenen loopt?                                                                          | <input type="radio"/> Ja                  |
| 27 |       |                                                                                                                     | <input type="radio"/> Nee                 |
| 28 |       |                                                                                                                     | <input type="radio"/> Niet van toepassing |
| 29 |       |                                                                                                                     |                                           |
| 30 |       |                                                                                                                     |                                           |
| 31 |       |                                                                                                                     |                                           |
| 32 | 9.5.1 | <b><i>If 'Heeft u pijn wanneer u met schoenen loopt?' is equal to 'Ja' answer this question:</i></b>                | (0.00) (100.00)                           |
| 33 |       | Hoeveel pijn heeft u wanneer u met schoenen loopt?                                                                  |                                           |
| 34 |       |                                                                                                                     |                                           |
| 35 |       |                                                                                                                     |                                           |
| 36 | 9.6   | Heeft u pijn wanneer u met schoenen staat?                                                                          | <input type="radio"/> Ja                  |
| 37 |       |                                                                                                                     | <input type="radio"/> Nee                 |
| 38 |       |                                                                                                                     | <input type="radio"/> Niet van toepassing |
| 39 |       |                                                                                                                     |                                           |
| 40 |       |                                                                                                                     |                                           |
| 41 |       |                                                                                                                     |                                           |
| 42 | 9.6.1 | <b><i>If 'Heeft u pijn wanneer u met schoenen staat?' is equal to 'Ja' answer this question:</i></b>                | (0.00) (100.00)                           |
| 43 |       | Hoeveel pijn heeft u wanneer u met schoenen staat?                                                                  |                                           |
| 44 |       |                                                                                                                     |                                           |
| 45 |       |                                                                                                                     |                                           |
| 46 | 9.7   | Heeft u pijn wanneer u loopt met steunzolen of een brace?                                                           | <input type="radio"/> Ja                  |
| 47 |       |                                                                                                                     | <input type="radio"/> Nee                 |
| 48 |       |                                                                                                                     | <input type="radio"/> Niet van toepassing |
| 49 |       |                                                                                                                     |                                           |
| 50 |       |                                                                                                                     |                                           |
| 51 |       |                                                                                                                     |                                           |
| 52 | 9.7.1 | <b><i>If 'Heeft u pijn wanneer u loopt met steunzolen of een brace?' is equal to 'Ja' answer this question:</i></b> | (0.00) (100.00)                           |
| 53 |       | Hoeveel pijn heeft u wanneer u loopt met steunzolen of een brace?                                                   |                                           |
| 54 |       |                                                                                                                     |                                           |
| 55 |       |                                                                                                                     |                                           |
| 56 |       |                                                                                                                     |                                           |
| 57 |       |                                                                                                                     |                                           |
| 58 |       |                                                                                                                     |                                           |
| 59 |       |                                                                                                                     |                                           |
| 60 |       |                                                                                                                     |                                           |

|    |        |                                                                                                                                                                                                                                                                                                                                                                                                                                               |                                                                                                    |          |
|----|--------|-----------------------------------------------------------------------------------------------------------------------------------------------------------------------------------------------------------------------------------------------------------------------------------------------------------------------------------------------------------------------------------------------------------------------------------------------|----------------------------------------------------------------------------------------------------|----------|
| 1  |        |                                                                                                                                                                                                                                                                                                                                                                                                                                               |                                                                                                    |          |
| 2  | 9.8    | Heeft u pijn wanneer u staat met steunzolen of een brace?                                                                                                                                                                                                                                                                                                                                                                                     | <input type="radio"/> Ja<br><input type="radio"/> Nee<br><input type="radio"/> Niet van toepassing |          |
| 3  |        |                                                                                                                                                                                                                                                                                                                                                                                                                                               |                                                                                                    |          |
| 4  |        |                                                                                                                                                                                                                                                                                                                                                                                                                                               |                                                                                                    |          |
| 5  |        |                                                                                                                                                                                                                                                                                                                                                                                                                                               |                                                                                                    |          |
| 6  |        |                                                                                                                                                                                                                                                                                                                                                                                                                                               |                                                                                                    |          |
| 7  |        |                                                                                                                                                                                                                                                                                                                                                                                                                                               |                                                                                                    |          |
| 8  | 9.8.1  | <b>If 'Heeft u pijn wanneer u staat met steunzolen of een brace?' is equal to 'Ja' answer this question:</b>                                                                                                                                                                                                                                                                                                                                  | (0.00)                                                                                             | (100.00) |
| 9  |        | Hoeveel pijn heeft u wanneer u staat met steunzolen of een brace?                                                                                                                                                                                                                                                                                                                                                                             |                                                                                                    |          |
| 10 |        |                                                                                                                                                                                                                                                                                                                                                                                                                                               |                                                                                                    |          |
| 11 |        |                                                                                                                                                                                                                                                                                                                                                                                                                                               |                                                                                                    |          |
| 12 |        |                                                                                                                                                                                                                                                                                                                                                                                                                                               |                                                                                                    |          |
| 13 | 9.9    | Heeft u pijn aan het einde van de dag?                                                                                                                                                                                                                                                                                                                                                                                                        | <input type="radio"/> Ja<br><input type="radio"/> Nee<br><input type="radio"/> Niet van toepassing |          |
| 14 |        |                                                                                                                                                                                                                                                                                                                                                                                                                                               |                                                                                                    |          |
| 15 |        |                                                                                                                                                                                                                                                                                                                                                                                                                                               |                                                                                                    |          |
| 16 |        |                                                                                                                                                                                                                                                                                                                                                                                                                                               |                                                                                                    |          |
| 17 |        |                                                                                                                                                                                                                                                                                                                                                                                                                                               |                                                                                                    |          |
| 18 |        |                                                                                                                                                                                                                                                                                                                                                                                                                                               |                                                                                                    |          |
| 19 | 9.9.1  | <b>If 'Heeft u pijn aan het einde van de dag?' is equal to 'Ja' answer this question:</b>                                                                                                                                                                                                                                                                                                                                                     | (0.00)                                                                                             | (100.00) |
| 20 |        | Hoeveel pijn heeft u aan het einde van de dag?                                                                                                                                                                                                                                                                                                                                                                                                |                                                                                                    |          |
| 21 |        |                                                                                                                                                                                                                                                                                                                                                                                                                                               |                                                                                                    |          |
| 22 |        |                                                                                                                                                                                                                                                                                                                                                                                                                                               |                                                                                                    |          |
| 23 |        | Instructies:De lijn naast elke vraag staat voor hoeveel MOEITE u heeft met verschillende activiteiten. De linker kant (0) is "Niet moeilijk" en de rechter kant (100) is "Te moeilijk, niet uitvoerbaar". Geef voor de onderstaande activiteiten op de lijn aan hoeveel MOEITE u in de afgelopen week door enkelklachten had met onderstaande activiteiten. Als een situatie niet van toepassing is, kies dan de optie "niet van toepassing". |                                                                                                    |          |
| 24 |        |                                                                                                                                                                                                                                                                                                                                                                                                                                               |                                                                                                    |          |
| 25 |        |                                                                                                                                                                                                                                                                                                                                                                                                                                               |                                                                                                    |          |
| 26 |        |                                                                                                                                                                                                                                                                                                                                                                                                                                               |                                                                                                    |          |
| 27 |        |                                                                                                                                                                                                                                                                                                                                                                                                                                               |                                                                                                    |          |
| 28 |        |                                                                                                                                                                                                                                                                                                                                                                                                                                               |                                                                                                    |          |
| 29 |        |                                                                                                                                                                                                                                                                                                                                                                                                                                               |                                                                                                    |          |
| 30 | 9.10   | Heeft u moeite met door het huis lopen?                                                                                                                                                                                                                                                                                                                                                                                                       | <input type="radio"/> Ja<br><input type="radio"/> Nee<br><input type="radio"/> Niet van toepassing |          |
| 31 |        |                                                                                                                                                                                                                                                                                                                                                                                                                                               |                                                                                                    |          |
| 32 |        |                                                                                                                                                                                                                                                                                                                                                                                                                                               |                                                                                                    |          |
| 33 |        |                                                                                                                                                                                                                                                                                                                                                                                                                                               |                                                                                                    |          |
| 34 |        |                                                                                                                                                                                                                                                                                                                                                                                                                                               |                                                                                                    |          |
| 35 | 9.10.1 | <b>If 'Heeft u moeite met door het huis lopen?' is equal to 'Ja' answer this question:</b>                                                                                                                                                                                                                                                                                                                                                    | (0.00)                                                                                             | (100.00) |
| 36 |        | Hoeveel moeite heeft u met door het huis lopen?                                                                                                                                                                                                                                                                                                                                                                                               |                                                                                                    |          |
| 37 |        |                                                                                                                                                                                                                                                                                                                                                                                                                                               |                                                                                                    |          |
| 38 |        |                                                                                                                                                                                                                                                                                                                                                                                                                                               |                                                                                                    |          |
| 39 |        |                                                                                                                                                                                                                                                                                                                                                                                                                                               |                                                                                                    |          |
| 40 | 9.11   | Heeft u moeite met buiten lopen op oneven ondergrond?                                                                                                                                                                                                                                                                                                                                                                                         | <input type="radio"/> Ja<br><input type="radio"/> Nee<br><input type="radio"/> Niet van toepassing |          |
| 41 |        |                                                                                                                                                                                                                                                                                                                                                                                                                                               |                                                                                                    |          |
| 42 |        |                                                                                                                                                                                                                                                                                                                                                                                                                                               |                                                                                                    |          |
| 43 |        |                                                                                                                                                                                                                                                                                                                                                                                                                                               |                                                                                                    |          |
| 44 |        |                                                                                                                                                                                                                                                                                                                                                                                                                                               |                                                                                                    |          |
| 45 | 9.11.1 | <b>If 'Heeft u moeite met buiten lopen op oneven ondergrond?' is equal to 'Ja' answer this question:</b>                                                                                                                                                                                                                                                                                                                                      | (0.00)                                                                                             | (100.00) |
| 46 |        | Hoeveel moeite heeft u met buiten lopen op oneven ondergrond?                                                                                                                                                                                                                                                                                                                                                                                 |                                                                                                    |          |
| 47 |        |                                                                                                                                                                                                                                                                                                                                                                                                                                               |                                                                                                    |          |
| 48 |        |                                                                                                                                                                                                                                                                                                                                                                                                                                               |                                                                                                    |          |
| 49 |        |                                                                                                                                                                                                                                                                                                                                                                                                                                               |                                                                                                    |          |
| 50 |        |                                                                                                                                                                                                                                                                                                                                                                                                                                               |                                                                                                    |          |
| 51 | 9.12   | Heeft u moeite met een paar honderd meter lopen?                                                                                                                                                                                                                                                                                                                                                                                              | <input type="radio"/> Ja<br><input type="radio"/> Nee<br><input type="radio"/> Niet van toepassing |          |
| 52 |        |                                                                                                                                                                                                                                                                                                                                                                                                                                               |                                                                                                    |          |
| 53 |        |                                                                                                                                                                                                                                                                                                                                                                                                                                               |                                                                                                    |          |
| 54 |        |                                                                                                                                                                                                                                                                                                                                                                                                                                               |                                                                                                    |          |
| 55 |        |                                                                                                                                                                                                                                                                                                                                                                                                                                               |                                                                                                    |          |
| 56 | 9.12.1 | <b>If 'Heeft u moeite met een paar honderd meter lopen?' is equal to 'Ja' answer this question:</b>                                                                                                                                                                                                                                                                                                                                           | (0.00)                                                                                             | (100.00) |
| 57 |        | Hoeveel moeite heeft u met een paar honderd meter lopen?                                                                                                                                                                                                                                                                                                                                                                                      |                                                                                                    |          |
| 58 |        |                                                                                                                                                                                                                                                                                                                                                                                                                                               |                                                                                                    |          |
| 59 |        |                                                                                                                                                                                                                                                                                                                                                                                                                                               |                                                                                                    |          |
| 60 |        |                                                                                                                                                                                                                                                                                                                                                                                                                                               |                                                                                                    |          |

|    |        |                                                                                                             |                                           |          |
|----|--------|-------------------------------------------------------------------------------------------------------------|-------------------------------------------|----------|
| 1  |        |                                                                                                             |                                           |          |
| 2  | 9.13   | Heeft u moeite met een trap oplopen?                                                                        | <input type="radio"/> Ja                  |          |
| 3  |        |                                                                                                             | <input type="radio"/> Nee                 |          |
| 4  |        |                                                                                                             | <input type="radio"/> Niet van toepassing |          |
| 5  |        |                                                                                                             |                                           |          |
| 6  |        |                                                                                                             |                                           |          |
| 7  |        |                                                                                                             |                                           |          |
| 8  | 9.13.1 | <b>If 'Heeft u moeite met een trap oplopen?' is equal to 'Ja' answer this question:</b>                     | (0.00)                                    | (100.00) |
| 9  |        | Hoeveel moeite heeft u met een trap oplopen?                                                                |                                           |          |
| 10 |        |                                                                                                             |                                           |          |
| 11 |        |                                                                                                             |                                           |          |
| 12 | 9.14   | Heeft u moeite met een trap aflopen?                                                                        | <input type="radio"/> Ja                  |          |
| 13 |        |                                                                                                             | <input type="radio"/> Nee                 |          |
| 14 |        |                                                                                                             | <input type="radio"/> Niet van toepassing |          |
| 15 |        |                                                                                                             |                                           |          |
| 16 |        |                                                                                                             |                                           |          |
| 17 |        |                                                                                                             |                                           |          |
| 18 | 9.14.1 | <b>If 'Heeft u moeite met een trap aflopen?' is equal to 'Ja' answer this question:</b>                     | (0.00)                                    | (100.00) |
| 19 |        | Hoeveel moeite heeft u met een trap aflopen?                                                                |                                           |          |
| 20 |        |                                                                                                             |                                           |          |
| 21 |        |                                                                                                             |                                           |          |
| 22 | 9.15   | Heeft u moeite met op de tenen staan?                                                                       | <input type="radio"/> Ja                  |          |
| 23 |        |                                                                                                             | <input type="radio"/> Nee                 |          |
| 24 |        |                                                                                                             | <input type="radio"/> Niet van toepassing |          |
| 25 |        |                                                                                                             |                                           |          |
| 26 |        |                                                                                                             |                                           |          |
| 27 |        |                                                                                                             |                                           |          |
| 28 | 9.15.1 | <b>If 'Heeft u moeite met op de tenen staan?' is equal to 'Ja' answer this question:</b>                    | (0.00)                                    | (100.00) |
| 29 |        | Hoeveel moeite heeft u met op de tenen staan?                                                               |                                           |          |
| 30 |        |                                                                                                             |                                           |          |
| 31 |        |                                                                                                             |                                           |          |
| 32 | 9.16   | Heeft u moeite met opstaan uit de stoel?                                                                    | <input type="radio"/> Ja                  |          |
| 33 |        |                                                                                                             | <input type="radio"/> Nee                 |          |
| 34 |        |                                                                                                             | <input type="radio"/> Niet van toepassing |          |
| 35 |        |                                                                                                             |                                           |          |
| 36 |        |                                                                                                             |                                           |          |
| 37 |        |                                                                                                             |                                           |          |
| 38 | 9.16.1 | <b>If 'Heeft u moeite met opstaan uit de stoel?' is equal to 'Ja' answer this question:</b>                 | (0.00)                                    | (100.00) |
| 39 |        | Hoeveel moeite heeft u met opstaan uit de stoel?                                                            |                                           |          |
| 40 |        |                                                                                                             |                                           |          |
| 41 |        |                                                                                                             |                                           |          |
| 42 | 9.17   | Heeft u moeite met het op- of afstappen van stoepranden?                                                    | <input type="radio"/> Ja                  |          |
| 43 |        |                                                                                                             | <input type="radio"/> Nee                 |          |
| 44 |        |                                                                                                             | <input type="radio"/> Niet van toepassing |          |
| 45 |        |                                                                                                             |                                           |          |
| 46 |        |                                                                                                             |                                           |          |
| 47 |        |                                                                                                             |                                           |          |
| 48 | 9.17.1 | <b>If 'Heeft u moeite met het op- of afstappen van stoepranden?' is equal to 'Ja' answer this question:</b> | (0.00)                                    | (100.00) |
| 49 |        | Hoeveel moeite heeft u met het op- of afstappen van stoepranden?                                            |                                           |          |
| 50 |        |                                                                                                             |                                           |          |
| 51 |        |                                                                                                             |                                           |          |
| 52 |        |                                                                                                             |                                           |          |
| 53 |        |                                                                                                             |                                           |          |
| 54 | 9.18   | Heeft u moeite met snel lopen of rennen?                                                                    | <input type="radio"/> Ja                  |          |
| 55 |        |                                                                                                             | <input type="radio"/> Nee                 |          |
| 56 |        |                                                                                                             | <input type="radio"/> Niet van toepassing |          |
| 57 |        |                                                                                                             |                                           |          |
| 58 |        |                                                                                                             |                                           |          |
| 59 |        |                                                                                                             |                                           |          |
| 60 |        |                                                                                                             |                                           |          |



9.18.1 ***If 'Heeft u moeite met snel lopen of rennen?' is equal to 'Ja' answer this question:*** (0.00) (100.00)  
 Hoeveel moeite heeft u met snel lopen of rennen?

## Vragenlijst PRIMA studie 26 weken - FAOS

| Number | Question                                                                                                                                                                                                                                                                                                                                                                                                                                                                                                                                                                            | Answers                                                                                                                                                    |
|--------|-------------------------------------------------------------------------------------------------------------------------------------------------------------------------------------------------------------------------------------------------------------------------------------------------------------------------------------------------------------------------------------------------------------------------------------------------------------------------------------------------------------------------------------------------------------------------------------|------------------------------------------------------------------------------------------------------------------------------------------------------------|
|        | Deze lijst vraagt naar uw mening over uw voet/enkel. Uw antwoorden geven ons een beeld van uw voet/enkel klachten en hoe u in staat bent om alledaagse activiteiten uit te voeren in uw huidige situatie. Beantwoorden van een vraag doet u door het aanklikken van een vakje met het volgens u meest juiste antwoord (één vakje per vraag). Als u niet zeker weet hoe u een vraag moet beantwoorden, geeft u dan het antwoord dat volgens u het meest op uw situatie van toepassing is. Deze vraag heeft betrekking op het voorkomen van voet/enkel klachten in de afgelopen week. |                                                                                                                                                            |
| 10.1   | Is uw voet/enkel gezwollen?                                                                                                                                                                                                                                                                                                                                                                                                                                                                                                                                                         | <input type="radio"/> Nooit <input type="radio"/> Zelden <input type="radio"/> Soms <input type="radio"/> Vaak <input type="radio"/> Altijd                |
| 10.2   | Voelt u gekraak of hoort u klikken of een ander vreemd geluid wanneer u de voet/enkel beweegt?                                                                                                                                                                                                                                                                                                                                                                                                                                                                                      | <input type="radio"/> Nooit <input type="radio"/> Zelden <input type="radio"/> Soms <input type="radio"/> Vaak <input type="radio"/> Altijd                |
| 10.3   | Hapert uw enkel of blokkeert uw enkel ('op slot' gaan zitten) wanneer u deze beweegt?                                                                                                                                                                                                                                                                                                                                                                                                                                                                                               | <input type="radio"/> Nooit <input type="radio"/> Zelden <input type="radio"/> Soms <input type="radio"/> Vaak <input type="radio"/> Altijd                |
| 10.4   | Kunt u de voet/enkel volledig strekken?                                                                                                                                                                                                                                                                                                                                                                                                                                                                                                                                             | <input type="radio"/> Altijd <input type="radio"/> Vaak <input type="radio"/> Soms <input type="radio"/> Zelden <input type="radio"/> Nooit                |
| 10.5   | Kunt u de voet volledig naar u toe buigen?                                                                                                                                                                                                                                                                                                                                                                                                                                                                                                                                          | <input type="radio"/> Altijd <input type="radio"/> Vaak <input type="radio"/> Soms <input type="radio"/> Zelden <input type="radio"/> Nooit                |
| 10.6   | In welke mate heeft u een stijf gevoel in de voet/enkel 's ochtends bij het wakker worden?                                                                                                                                                                                                                                                                                                                                                                                                                                                                                          | <input type="radio"/> Niet Ernstig <input type="radio"/> Mild <input type="radio"/> Matig <input type="radio"/> Zeer ernstig                               |
| 10.7   | In welke mate heeft u een stijf gevoel in de voet/enkel na zitten, liggen of rusten later op de dag?                                                                                                                                                                                                                                                                                                                                                                                                                                                                                | <input type="radio"/> Niet Ernstig <input type="radio"/> Mild <input type="radio"/> Matig <input type="radio"/> Zeer ernstig                               |
| 10.8   | Hoe vaak heeft u pijn in uw voet/enkel?                                                                                                                                                                                                                                                                                                                                                                                                                                                                                                                                             | <input type="radio"/> Nooit <input type="radio"/> Maandelijks <input type="radio"/> Wekelijks <input type="radio"/> Dagelijks <input type="radio"/> Altijd |

1  
2  
3  
4  
5  
6  
7  
8  
9

---

10.9 Hoeveel voet/enkel pijn heeft u gehad in de afgelopen week bij draaien als uw voet/enkel op de grond staat?

Geen  
 Mild  
 Matig  
 Ernstig  
 Zeer ernstig

---

10  
11  
12  
13  
14  
15  
16  
17  
18

---

10.10 Hoeveel voet/enkel pijn heeft u gehad in de afgelopen week bij het volledig uitstrekken van de voet/enkel?

Geen  
 Mild  
 Matig  
 Ernstig  
 Zeer ernstig

---

19  
20  
21  
22  
23  
24  
25  
26

---

10.11 Hoeveel voet/enkel pijn heeft u gehad in de afgelopen week bij het volledig naar u toe buigen/optrekken van de voet/enkel

Geen  
 Mild  
 Matig  
 Ernstig  
 Zeer ernstig

---

27  
28  
29  
30  
31  
32  
33  
34

---

10.12 Hoeveel voet/enkel pijn heeft u gehad in de afgelopen week bij het lopen op een vlakke ondergrond

Geen  
 Mild  
 Matig  
 Ernstig  
 Zeer ernstig

---

35  
36  
37  
38  
39  
40  
41  
42  
43

---

10.13 Hoeveel voet/enkel pijn heeft u gehad in de afgelopen week bij het trap op- en trap af lopen?

Geen  
 Mild  
 Matig  
 Ernstig  
 Zeer ernstig

---

44  
45  
46  
47  
48  
49  
50  
51

---

10.14 Hoeveel voet/enkel pijn heeft u gehad in de afgelopen week 's nachts in bed?

Geen  
 Mild  
 Matig  
 Ernstig  
 Zeer ernstig

---

52  
53  
54  
55  
56  
57  
58  
59  
60

---

10.15 Hoeveel voet/enkel pijn heeft u gehad in de afgelopen week bij het zitten of liggen?

Geen  
 Mild  
 Matig  
 Ernstig  
 Zeer ernstig

---

|    |       |                                                                                                                        |                                    |                                    |
|----|-------|------------------------------------------------------------------------------------------------------------------------|------------------------------------|------------------------------------|
| 1  |       |                                                                                                                        |                                    |                                    |
| 2  | 10.16 | Hoeveel voet/enkel pijn heeft u gehad in de afgelopen week bij het rechtop staan?                                      | <input type="radio"/> Geen         |                                    |
| 3  |       |                                                                                                                        | <input type="radio"/> Mild         |                                    |
| 4  |       |                                                                                                                        | <input type="radio"/> Matig        |                                    |
| 5  |       |                                                                                                                        | <input type="radio"/> Ernstig      |                                    |
| 6  |       |                                                                                                                        | <input type="radio"/> Zeer ernstig |                                    |
| 7  |       |                                                                                                                        |                                    |                                    |
| 8  |       |                                                                                                                        |                                    |                                    |
| 9  |       |                                                                                                                        |                                    |                                    |
| 10 | 10.17 | In welke mate werd u gehinderd bij het trap aflopen?                                                                   | <input type="radio"/> Niet         | <input type="radio"/> Mild         |
| 11 |       |                                                                                                                        | <input type="radio"/> Matig        | <input type="radio"/>              |
| 12 |       |                                                                                                                        | Ernstig                            | <input type="radio"/> Zeer ernstig |
| 13 |       |                                                                                                                        |                                    |                                    |
| 14 |       |                                                                                                                        |                                    |                                    |
| 15 | 10.18 | In welke mate werd u gehinderd bij het trap op lopen?                                                                  | <input type="radio"/> Niet         | <input type="radio"/> Mild         |
| 16 |       |                                                                                                                        | <input type="radio"/> Matig        | <input type="radio"/>              |
| 17 |       |                                                                                                                        | Ernstig                            | <input type="radio"/> Zeer ernstig |
| 18 |       |                                                                                                                        |                                    |                                    |
| 19 | 10.19 | In welke mate werd u gehinderd als u vanuit een zittende positie ging staan?                                           | <input type="radio"/> Niet         | <input type="radio"/> Mild         |
| 20 |       |                                                                                                                        | <input type="radio"/> Matig        | <input type="radio"/>              |
| 21 |       |                                                                                                                        | Ernstig                            | <input type="radio"/> Zeer ernstig |
| 22 |       |                                                                                                                        |                                    |                                    |
| 23 |       |                                                                                                                        |                                    |                                    |
| 24 | 10.20 | In welke mate werd u gehinderd bij het staan?                                                                          | <input type="radio"/> Niet         | <input type="radio"/> Mild         |
| 25 |       |                                                                                                                        | <input type="radio"/> Matig        | <input type="radio"/>              |
| 26 |       |                                                                                                                        | Ernstig                            | <input type="radio"/> Zeer ernstig |
| 27 |       |                                                                                                                        |                                    |                                    |
| 28 | 10.21 | In welke mate werd u gehinderd bij het naar de grond buigen/iets oprapen?                                              | <input type="radio"/> Niet         | <input type="radio"/> Mild         |
| 29 |       |                                                                                                                        | <input type="radio"/> Matig        | <input type="radio"/>              |
| 30 |       |                                                                                                                        | Ernstig                            | <input type="radio"/> Zeer ernstig |
| 31 |       |                                                                                                                        |                                    |                                    |
| 32 | 10.22 | In welke mate werd u gehinderd bij het lopen op een vlakke ondergrond?                                                 | <input type="radio"/> Niet         | <input type="radio"/> Mild         |
| 33 |       |                                                                                                                        | <input type="radio"/> Matig        | <input type="radio"/>              |
| 34 |       |                                                                                                                        | Ernstig                            | <input type="radio"/> Zeer ernstig |
| 35 |       |                                                                                                                        |                                    |                                    |
| 36 |       |                                                                                                                        |                                    |                                    |
| 37 | 10.23 | In welke mate werd u gehinderd bij het in- en uit de auto stappen?                                                     | <input type="radio"/> Niet         | <input type="radio"/> Mild         |
| 38 |       |                                                                                                                        | <input type="radio"/> Matig        | <input type="radio"/>              |
| 39 |       |                                                                                                                        | Ernstig                            | <input type="radio"/> Zeer ernstig |
| 40 |       |                                                                                                                        |                                    |                                    |
| 41 | 10.24 | In welke mate werd u gehinderd bij het boodschappen doen?                                                              | <input type="radio"/> Niet         | <input type="radio"/> Mild         |
| 42 |       |                                                                                                                        | <input type="radio"/> Matig        | <input type="radio"/>              |
| 43 |       |                                                                                                                        | Ernstig                            | <input type="radio"/> Zeer ernstig |
| 44 |       |                                                                                                                        |                                    |                                    |
| 45 | 10.25 | In welke mate werd u gehinderd bij sokken/panty's aantrekken?                                                          | <input type="radio"/> Niet         | <input type="radio"/> Mild         |
| 46 |       |                                                                                                                        | <input type="radio"/> Matig        | <input type="radio"/>              |
| 47 |       |                                                                                                                        | Ernstig                            | <input type="radio"/> Zeer ernstig |
| 48 |       |                                                                                                                        |                                    |                                    |
| 49 |       |                                                                                                                        |                                    |                                    |
| 50 | 10.26 | In welke mate werd u gehinderd bij het opstaan uit bed?                                                                | <input type="radio"/> Niet         | <input type="radio"/> Mild         |
| 51 |       |                                                                                                                        | <input type="radio"/> Matig        | <input type="radio"/>              |
| 52 |       |                                                                                                                        | Ernstig                            | <input type="radio"/> Zeer ernstig |
| 53 |       |                                                                                                                        |                                    |                                    |
| 54 | 10.27 | In welke mate werd u gehinderd bij het sokken uittrekken?                                                              | <input type="radio"/> Niet         | <input type="radio"/> Mild         |
| 55 |       |                                                                                                                        | <input type="radio"/> Matig        | <input type="radio"/>              |
| 56 |       |                                                                                                                        | Ernstig                            | <input type="radio"/> Zeer ernstig |
| 57 |       |                                                                                                                        |                                    |                                    |
| 58 |       |                                                                                                                        |                                    |                                    |
| 59 | 10.28 | In welke mate werd u gehinderd bij het in bed liggen (omdraaien, lange tijd uw voet/enkel in dezelfde positie houden)? | <input type="radio"/> Niet         | <input type="radio"/> Mild         |
| 60 |       |                                                                                                                        | <input type="radio"/> Matig        | <input type="radio"/>              |
|    |       |                                                                                                                        | Ernstig                            | <input type="radio"/> Zeer ernstig |

|       |                                                                                                                  |                                                                                                                                                                    |                                                                      |                             |                              |
|-------|------------------------------------------------------------------------------------------------------------------|--------------------------------------------------------------------------------------------------------------------------------------------------------------------|----------------------------------------------------------------------|-----------------------------|------------------------------|
| 10.29 | In welke mate werd u gehinderd bij het in/uit bad stappen?                                                       | <input type="radio"/> Niet<br>Ernstig                                                                                                                              | <input type="radio"/> Mild<br><input type="radio"/> Zeer ernstig     | <input type="radio"/> Matig | <input type="radio"/>        |
| 10.30 | In welke mate werd u gehinderd bij zitten?                                                                       | <input type="radio"/> Niet<br>Ernstig                                                                                                                              | <input type="radio"/> Mild<br><input type="radio"/> Zeer ernstig     | <input type="radio"/> Matig | <input type="radio"/>        |
| 10.31 | In welke mate werd u gehinderd bij het toilet op en af gaan?                                                     | <input type="radio"/> Niet<br>Ernstig                                                                                                                              | <input type="radio"/> Mild<br><input type="radio"/> Zeer ernstig     | <input type="radio"/> Matig | <input type="radio"/>        |
| 10.32 | In welke mate werd u gehinderd bij zwaar huishoudelijk werk (bijvoorbeeld zware dozen sjouwen, vloer schrobben)? | <input type="radio"/> Niet<br>Ernstig                                                                                                                              | <input type="radio"/> Mild<br><input type="radio"/> Zeer ernstig     | <input type="radio"/> Matig | <input type="radio"/>        |
| 10.33 | In welke mate werd u gehinderd bij licht huishoudelijk werk (bijvoorbeeld koken, afstoffen)?                     | <input type="radio"/> Niet<br>Ernstig                                                                                                                              | <input type="radio"/> Mild<br><input type="radio"/> Zeer ernstig     | <input type="radio"/> Matig | <input type="radio"/>        |
| 10.34 | In welke mate werd u gehinderd bij hurken?                                                                       | <input type="radio"/> Niet<br>Ernstig                                                                                                                              | <input type="radio"/> Mild<br><input type="radio"/> Zeer ernstig     | <input type="radio"/> Matig | <input type="radio"/>        |
| 10.35 | In welke mate werd u gehinderd bij hardlopen?                                                                    | <input type="radio"/> Niet<br>Ernstig                                                                                                                              | <input type="radio"/> Mild<br><input type="radio"/> Zeer ernstig     | <input type="radio"/> Matig | <input type="radio"/>        |
| 10.36 | In welke mate werd u gehinderd bij springen?                                                                     | <input type="radio"/> Niet<br>Ernstig                                                                                                                              | <input type="radio"/> Mild<br><input type="radio"/> Zeer ernstig     | <input type="radio"/> Matig | <input type="radio"/>        |
| 10.37 | In welke mate werd u gehinderd bij ronddraaien op uw aangedane voet/enkel?                                       | <input type="radio"/> Niet<br>Ernstig                                                                                                                              | <input type="radio"/> Mild<br><input type="radio"/> Zeer ernstig     | <input type="radio"/> Matig | <input type="radio"/>        |
| 10.38 | In welke mate werd u gehinderd bij knielen?                                                                      | <input type="radio"/> Niet<br>Ernstig                                                                                                                              | <input type="radio"/> Mild<br><input type="radio"/> Zeer ernstig     | <input type="radio"/> Matig | <input type="radio"/>        |
| 10.39 | Hoe vaak bent u zich bewust van uw voet/enkel probleem?                                                          | <input type="radio"/> Nooit<br>Wekelijks                                                                                                                           | <input type="radio"/> Maandelijks<br><input type="radio"/> Dagelijks | <input type="radio"/>       | <input type="radio"/> Altijd |
| 10.40 | Heeft u uw leven veranderd om activiteiten te vermijden die schadelijk kunnen zijn voor uw voet/enkel?           | <input type="radio"/> Niet<br><input type="radio"/> Enigszins<br><input type="radio"/> Matig<br><input type="radio"/> Behoorlijk<br><input type="radio"/> Volledig |                                                                      |                             |                              |

1  
2  
3  
4  
5  
6  
7  
8  
9

10.41 In hoeverre kunt u op uw voet/enkel vertrouwen?

Volledig  
 Behoorlijk  
 Matig  
 Enigzins  
 Niet

10  
11  
12  
13  
14  
15  
16  
17  
18  
19  
20  
21  
22

10.42 In het algemeen, in welke mate ondervindt u hinder van uw voet/enkel

Geen  
 Mild  
 Matig  
 Ernstig  
 Zeer ernstig

23  
24  
25  
26

## Vragenlijst PRIMA studie 26 weken - PRODISQ - Gezondheid en werk

| Number | Question                                                                                                                                                                                                                                                                    | Answers                                                                                                                                                                                                                                                                                                                                                                                                                                                                                                                                                                |
|--------|-----------------------------------------------------------------------------------------------------------------------------------------------------------------------------------------------------------------------------------------------------------------------------|------------------------------------------------------------------------------------------------------------------------------------------------------------------------------------------------------------------------------------------------------------------------------------------------------------------------------------------------------------------------------------------------------------------------------------------------------------------------------------------------------------------------------------------------------------------------|
| 11.1   | Wat is uw leeftijd?                                                                                                                                                                                                                                                         | <input type="text"/> jaar                                                                                                                                                                                                                                                                                                                                                                                                                                                                                                                                              |
| 11.2   | Wat is uw geslacht?                                                                                                                                                                                                                                                         | <input type="radio"/> Man<br><input type="radio"/> Vrouw                                                                                                                                                                                                                                                                                                                                                                                                                                                                                                               |
| 11.3   | Wat is de hoogste opleiding die u heeft afgemaakt (Zoek uw hoogste opleiding en kruis het hokje daarvoor aan)?                                                                                                                                                              | <input type="checkbox"/> Ik heb geen school of opleiding afgemaakt<br><input type="checkbox"/> Lagere school of basisschool<br><input type="checkbox"/> Huishoudschool, vbo, lbo, lts, leao of lhno<br><input type="checkbox"/> Mavo, mulo, ivo of vmbo<br><input type="checkbox"/> Mbo, mts, meao, mhno, inas of intas<br><input type="checkbox"/> Havo, vwo, hbs, mms, atheneum of gymnasium<br><input type="checkbox"/> Hbo, hts, heao of hhno<br><input type="checkbox"/> Universiteit<br><input type="checkbox"/> Ik heb een andere opleiding afgemaakt, namelijk |
| 11.3.1 | <b><i>If 'Wat is de hoogste opleiding die u heeft afgemaakt (Zoek uw hoogste opleiding en kruis het hokje daarvoor aan)?' is equal to 'Ik heb een andere opleiding afgemaakt, namelijk' answer this question:</i></b><br>Wat is de hoogste opleiding die u heeft afgemaakt? | <input type="text"/>                                                                                                                                                                                                                                                                                                                                                                                                                                                                                                                                                   |

27  
28  
29  
30  
31  
32  
33  
34  
35  
36  
37  
38  
39  
40  
41  
42  
43  
44  
45  
46  
47  
48  
49  
50  
51  
52  
53  
54  
55  
56  
57  
58  
59  
60

- 1  
2  
3  
4  
5  
6  
7  
8  
9  
10  
11  
12  
13
- 11.4 Wat doet u in het dagelijks leven?
- Ik zit op school, ik studeer
- Ik werk in loondienst
- Ik ben zelfstandig ondernemer
- Ik ben huisvrouw, huisman
- Ik ben werkloos
- Ik ben arbeidsongeschikt
- Ik ben met pensioen of prepensioen
- Ik doe iets anders, namelijk

14  
15  
16  
17

11.4.1 ***If 'Wat doet u in het dagelijks leven?' is equal to 'Ik ben arbeidsongeschikt' answer this question:***

Wat doet u in het dagelijks leven?

18  
19  
20  
21  
22  
23

11.4.2 ***If 'Wat doet u in het dagelijks leven?' is equal to 'Ik doe iets anders, namelijk' answer this question:***

Wat doet u in het dagelijks leven?

24  
25  
26  
27  
28

11.5 Hebt u betaald werk?

Nee

Ja

29  
30  
31  
32

11.5.1 ***If 'Hebt u betaald werk?' is equal to 'Ja' answer this question:***

Wat is uw beroep?

33  
34  
35  
36  
37

11.5.2 ***If 'Hebt u betaald werk?' is equal to 'Ja' answer this question:***

Hoeveel uur per week werkt u (Tel alleen de uren waarvoor u betaald wordt)?

uren

38  
39  
40  
41  
42

11.5.3 ***If 'Hebt u betaald werk?' is equal to 'Ja' answer this question:***

Hoeveel dagen in de week werkt u?

Dagen

43  
44  
45  
46  
47

11.5.4 ***If 'Hebt u betaald werk?' is equal to 'Ja' answer this question:***

Bent u in de afgelopen 4 weken afwezig geweest van uw werk omdat u ziek was?

Nee

Ja

48  
49  
50  
51  
52  
53  
54

11.5.4.1 ***If 'Bent u in de afgelopen 4 weken afwezig geweest van uw werk omdat u ziek was?' is equal to 'Ja' answer this question:***

Bent u in de afgelopen 4 weken afwezig geweest van uw werk omdat u ziek was (Tel alleen de werkdagen in de afgelopen 4 weken)?

dagen afwezig geweest

55  
56  
57  
58  
59  
60

11.5.4.2 ***If 'Bent u in de afgelopen 4 weken afwezig geweest van uw werk omdat u ziek was?' is equal to 'Ja' answer this question:***

Was u langer dan de gehele periode van 4 weken afwezig van uw werk doordat u ziek was?

Nee

Ja

|            |                                                                                                                                                                                                                                                                                                                                                                                                                 |                                                                                       |
|------------|-----------------------------------------------------------------------------------------------------------------------------------------------------------------------------------------------------------------------------------------------------------------------------------------------------------------------------------------------------------------------------------------------------------------|---------------------------------------------------------------------------------------|
| 11.5.4.2.1 | <b>If 'Was u langer dan de gehele periode van 4 weken afwezig van uw werk doordat u ziek was?' is equal to 'Ja' answer this question:</b><br>Wanneer heeft u zich ziek gemeld?                                                                                                                                                                                                                                  | <input type="text"/> <input type="text"/> <input type="text"/> (dd-mm-yyyy)           |
| 11.5.5     | <b>If 'Hebt u betaald werk?' is equal to 'Ja' answer this question:</b><br>Waren er in de afgelopen 4 weken, dagen waarop u wel gewerkt heeft, maar tijdens uw werk last had van lichamelijke of psychische problemen?                                                                                                                                                                                          | <input type="radio"/> Ja<br><input type="radio"/> Nee                                 |
| 11.5.5.1   | <b>If 'Waren er in de afgelopen 4 weken, dagen waarop u wel gewerkt heeft, maar tijdens uw werk last had van lichamelijke of psychische problemen?' is equal to 'Ja' answer this question:</b><br>Op hoeveel werkdagen had u tijdens uw werk last van uw lichamelijke of psychische problemen?                                                                                                                  | <input type="text"/> werkdagen                                                        |
| 11.5.5.2   | <b>If 'Waren er in de afgelopen 4 weken, dagen waarop u wel gewerkt heeft, maar tijdens uw werk last had van lichamelijke of psychische problemen?' is equal to 'Ja' answer this question:</b><br>Op de dagen dat u last had, kon u misschien niet zoveel werk doen als normaal. Hoeveel werk kon u op deze dagen gemiddeld doen?                                                                               | Ik kon op deze dagen niks doen (0.00)      Ik kon net zoveel doen als normaal (10.00) |
| 11.6       | Waren er dagen waarop u minder onbetaald werk kon doen door uw lichamelijke of psychische problemen?                                                                                                                                                                                                                                                                                                            | <input type="radio"/> Nee<br><input type="radio"/> Ja                                 |
| 11.6.1     | <b>If 'Waren er dagen waarop u minder onbetaald werk kon doen door uw lichamelijke of psychische problemen?' is equal to 'Ja' answer this question:</b><br>Op hoeveel dagen was dit zo?                                                                                                                                                                                                                         | <input type="text"/> Dagen                                                            |
| 11.6.2     | <b>If 'Waren er dagen waarop u minder onbetaald werk kon doen door uw lichamelijke of psychische problemen?' is equal to 'Ja' answer this question:</b><br>Stel dat iemand, bijvoorbeeld uw partner, familielid of een bekende, u op deze dagen had geholpen. En al het onbetaalde werk wat u niet kon doen, voor u had gedaan. Hoeveel uur was die persoon hier op deze dagen dan gemiddeld mee bezig geweest? | <input type="text"/> uur op deze dagen                                                |

## Vragenlijst PRIMA studie 26 weken - PRODISQ - Zorggebruik

| Number | Question | Answers |
|--------|----------|---------|
|--------|----------|---------|

Wij willen graag weten met welke dokters u in de afgelopen 3 maanden een afspraak had. Het gaat om afspraken voor uzelf. Ook andere zorgverleners tellen mee. Bijvoorbeeld de fysiotherapeut.

1  
2  
3  
4  
5

12.1 Bent u in de afgelopen 3 maanden naar uw huisarts geweest?  Nee  
 Ja

6  
7  
8  
9  
10  
11

12.1.1 ***If 'Bent u in de afgelopen 3 maanden naar uw huisarts geweest?' is equal to 'Ja' answer this question:***  afspraken  
Hoeveel afspraken had u?

12  
13  
14  
15

12.2 Bent u in de afgelopen 3 maanden in contact geweest met een maatschappelijk werker?  Nee  
 Ja

16  
17  
18  
19  
20  
21

12.2.1 ***If 'Bent u in de afgelopen 3 maanden in contact geweest met een maatschappelijk werker?' is equal to 'Ja' answer this question:***  afspraken  
Hoeveel afspraken had u?

22  
23  
24  
25

12.3 Bent u in de afgelopen 3 maanden naar een fysiotherapeut geweest? Of een caesartherapeut, therapeut mensendieck of een manueel therapeut?  Nee  
 Ja

26  
27  
28  
29  
30  
31

12.3.1 ***If 'Bent u in de afgelopen 3 maanden naar een fysiotherapeut geweest? Of een caesartherapeut, therapeut mensendieck of een manueel therapeut?' is equal to 'Ja' answer this question:***  afspraken  
Hoeveel afspraken had u?

32  
33  
34  
35

12.4 Bent u in de afgelopen 3 maanden naar een ergotherapeut geweest?  Nee  
 Ja

36  
37  
38  
39  
40  
41

12.4.1 ***If 'Bent u in de afgelopen 3 maanden naar een ergotherapeut geweest?' is equal to 'Ja' answer this question:***  afspraken  
Hoeveel afspraken had u?

42  
43  
44  
45

12.5 Bent u in de afgelopen 3 maanden naar een logopedist geweest?  Nee  
 Ja

46  
47  
48  
49  
50  
51

12.5.1 ***If 'Bent u in de afgelopen 3 maanden naar een logopedist geweest?' is equal to 'Ja' answer this question:***  afspraken  
Hoeveel afspraken had u?

52  
53  
54  
55

12.6 Bent u in de afgelopen 3 maanden naar een diëtist geweest?  Nee  
 Ja

56  
57  
58  
59  
60

12.6.1 ***If 'Bent u in de afgelopen 3 maanden naar een diëtist geweest?' is equal to 'Ja' answer this question:***  afspraken  
Hoeveel afspraken had u?



|    |           |                                                                                                                                                                                                    |                                                                                                     |
|----|-----------|----------------------------------------------------------------------------------------------------------------------------------------------------------------------------------------------------|-----------------------------------------------------------------------------------------------------|
| 1  |           |                                                                                                                                                                                                    |                                                                                                     |
| 2  | 12.7      | Bent u in de afgelopen 3 maanden naar een homeopaat geweest? Of een acupuncturist?                                                                                                                 | <input type="radio"/> Nee                                                                           |
| 3  |           |                                                                                                                                                                                                    | <input type="radio"/> Ja                                                                            |
| 4  |           |                                                                                                                                                                                                    |                                                                                                     |
| 5  |           |                                                                                                                                                                                                    |                                                                                                     |
| 6  | 12.7.1    | <b>If 'Bent u in de afgelopen 3 maanden naar een homeopaat geweest? Of een acupuncturist?' is equal to 'Ja' answer this question:</b>                                                              | <input type="text"/> afspraken                                                                      |
| 7  |           | Hoeveel afspraken had u?                                                                                                                                                                           |                                                                                                     |
| 8  |           |                                                                                                                                                                                                    |                                                                                                     |
| 9  |           |                                                                                                                                                                                                    |                                                                                                     |
| 10 |           |                                                                                                                                                                                                    |                                                                                                     |
| 11 |           |                                                                                                                                                                                                    |                                                                                                     |
| 12 | 12.8      | Bent u in de afgelopen 3 maanden naar een psycholoog geweest? Of een psychotherapeut of psychiater?                                                                                                | <input type="radio"/> Nee                                                                           |
| 13 |           |                                                                                                                                                                                                    | <input type="radio"/> Ja                                                                            |
| 14 |           |                                                                                                                                                                                                    |                                                                                                     |
| 15 |           |                                                                                                                                                                                                    |                                                                                                     |
| 16 | 12.8.1    | <b>If 'Bent u in de afgelopen 3 maanden naar een psycholoog geweest? Of een psychotherapeut of psychiater?' is equal to 'Ja' answer this question:</b>                                             | <input type="text"/> afspraken                                                                      |
| 17 |           | Hoeveel afspraken had u?                                                                                                                                                                           |                                                                                                     |
| 18 |           |                                                                                                                                                                                                    |                                                                                                     |
| 19 |           |                                                                                                                                                                                                    |                                                                                                     |
| 20 |           |                                                                                                                                                                                                    |                                                                                                     |
| 21 |           |                                                                                                                                                                                                    |                                                                                                     |
| 22 | 12.9      | Heeft u in de afgelopen 3 maanden afspraken gehad met de bedrijfsarts?                                                                                                                             | <input type="radio"/> Nee                                                                           |
| 23 |           |                                                                                                                                                                                                    | <input type="radio"/> Ja                                                                            |
| 24 |           |                                                                                                                                                                                                    |                                                                                                     |
| 25 |           |                                                                                                                                                                                                    |                                                                                                     |
| 26 | 12.9.1    | <b>If 'Heeft u in de afgelopen 3 maanden afspraken gehad met de bedrijfsarts?' is equal to 'Ja' answer this question:</b>                                                                          | <input type="text"/> afspraken                                                                      |
| 27 |           | Hoeveel afspraken had u?                                                                                                                                                                           |                                                                                                     |
| 28 |           |                                                                                                                                                                                                    |                                                                                                     |
| 29 |           |                                                                                                                                                                                                    |                                                                                                     |
| 30 |           |                                                                                                                                                                                                    |                                                                                                     |
| 31 |           |                                                                                                                                                                                                    |                                                                                                     |
| 32 | 12.10     | Heeft u in de afgelopen 3 maanden hulp van de thuiszorg gehad?                                                                                                                                     | <input type="radio"/> Ja                                                                            |
| 33 |           |                                                                                                                                                                                                    | <input type="radio"/> Nee                                                                           |
| 34 |           |                                                                                                                                                                                                    |                                                                                                     |
| 35 |           |                                                                                                                                                                                                    |                                                                                                     |
| 36 | 12.10.1   | <b>If 'Heeft u in de afgelopen 3 maanden hulp van de thuiszorg gehad?' is equal to 'Ja' answer this question:</b>                                                                                  | <input type="checkbox"/> Huishoudelijke hulp; voorbeeld: stofzuigen, bed opmaken, boodschappen doen |
| 37 |           | Wat voor hulp van de thuiszorg heeft u gehad in de afgelopen 3 maanden?                                                                                                                            | <input type="checkbox"/> Verzorging van uzelf; voorbeeld: hulp bij douchen of aankleden             |
| 38 |           |                                                                                                                                                                                                    | <input type="checkbox"/> Verpleging; voorbeeld: verband omdoen, medicijnen geven, bloeddruk meten   |
| 39 |           |                                                                                                                                                                                                    |                                                                                                     |
| 40 |           |                                                                                                                                                                                                    |                                                                                                     |
| 41 |           |                                                                                                                                                                                                    |                                                                                                     |
| 42 |           |                                                                                                                                                                                                    |                                                                                                     |
| 43 |           |                                                                                                                                                                                                    |                                                                                                     |
| 44 |           |                                                                                                                                                                                                    |                                                                                                     |
| 45 |           |                                                                                                                                                                                                    |                                                                                                     |
| 46 |           |                                                                                                                                                                                                    |                                                                                                     |
| 47 | 12.10.1.1 | <b>If 'Wat voor hulp van de thuiszorg heeft u gehad in de afgelopen 3 maanden?' is equal to 'Huishoudelijke hulp; voorbeeld: stofzuigen, bed opmaken, boodschappen doen' answer this question:</b> | <input type="text"/> weken in de afgelopen 3 maanden                                                |
| 48 |           | Hoeveel weken heeft u deze thuiszorg gehad?                                                                                                                                                        |                                                                                                     |
| 49 |           | Huishoudelijke hulp:                                                                                                                                                                               |                                                                                                     |
| 50 |           |                                                                                                                                                                                                    |                                                                                                     |
| 51 |           |                                                                                                                                                                                                    |                                                                                                     |
| 52 |           |                                                                                                                                                                                                    |                                                                                                     |
| 53 |           |                                                                                                                                                                                                    |                                                                                                     |
| 54 |           |                                                                                                                                                                                                    |                                                                                                     |
| 55 |           |                                                                                                                                                                                                    |                                                                                                     |
| 56 | 12.10.1.2 | <b>If 'Wat voor hulp van de thuiszorg heeft u gehad in de afgelopen 3 maanden?' is equal to 'Verzorging van uzelf; voorbeeld: hulp bij douchen of aankleden' answer this question:</b>             | <input type="text"/> weken in de afgelopen 3 maanden                                                |
| 57 |           | Hoeveel weken heeft u deze thuiszorg gehad?                                                                                                                                                        |                                                                                                     |
| 58 |           | Verzorging van uzelf:                                                                                                                                                                              |                                                                                                     |
| 59 |           |                                                                                                                                                                                                    |                                                                                                     |
| 60 |           |                                                                                                                                                                                                    |                                                                                                     |

- 1  
2  
3  
4  
5  
6  
7  
8
- 12.10.1.3 **If 'Wat voor hulp van de thuiszorg heeft u gehad in de afgelopen 3 maanden?' is equal to 'Verpleging; voorbeeld: verband omdoen, medicijnen geven, bloeddruk meten' answer this question:**  
Hoeveel weken heeft u deze thuiszorg gehad?  
Verpleging:  weken in de afgelopen 3 maanden
- 9  
10  
11  
12  
13  
14  
15  
16  
17
- 12.10.1.4 **If 'Wat voor hulp van de thuiszorg heeft u gehad in de afgelopen 3 maanden?' is equal to 'Huishoudelijke hulp; voorbeeld: stofzuigen, bed opmaken, boodschappen doen' answer this question:**  
Hoeveel uur thuiszorg kreeg u in deze weken gemiddeld? Huishoudelijke hulp: gemiddeld  uur in de week
- 18  
19  
20  
21  
22  
23  
24
- 12.10.1.5 **If 'Wat voor hulp van de thuiszorg heeft u gehad in de afgelopen 3 maanden?' is equal to 'Verzorging van uzelf; voorbeeld: hulp bij douchen of aankleden' answer this question:**  
Hoeveel uur thuiszorg kreeg u in deze weken gemiddeld? Verzorging van uzelf: gemiddeld  uur in de week
- 25  
26  
27  
28  
29  
30  
31  
32
- 12.10.1.6 **If 'Wat voor hulp van de thuiszorg heeft u gehad in de afgelopen 3 maanden?' is equal to 'Verpleging; voorbeeld: verband omdoen, medicijnen geven, bloeddruk meten' answer this question:**  
Hoeveel uur thuiszorg kreeg u in deze weken gemiddeld? Verpleging: gemiddeld  uur in de week
- 33  
34  
35  
36
- 12.11 Heeft u in de afgelopen 3 maanden medicijnen gebruikt?  Ja  Nee
- 37  
38  
39  
40  
41  
42
- 12.11.1 **If 'Heeft u in de afgelopen 3 maanden medicijnen gebruikt?' is equal to 'Ja' answer this question:**  
Welke medicijnen heeft u in de afgelopen 3 maanden gebruikt?
- 43  
44  
45  
46  
47
- 12.12 Bent u in de afgelopen 3 maanden op de spoedeisende eerste hulp van een ziekenhuis geweest? (Een andere naam voor spoedeisende eerste hulp is EHBO)  Nee  Ja
- 48  
49  
50  
51  
52  
53  
54  
55
- 12.12.1 **If 'Bent u in de afgelopen 3 maanden op de spoedeisende eerste hulp van een ziekenhuis geweest? (Een andere naam voor spoedeisende eerste hulp is EHBO)' is equal to 'Ja' answer this question:**  
Hoe vaak bent u geweest?  keer
- 56  
57  
58  
59  
60
- 12.13 Bent u in de afgelopen 3 maanden met een ambulance naar het ziekenhuis gebracht? (Een andere naam voor ambulance is ziekenauto)  Nee  Ja

1  
2  
3  
4  
5  
6  
7

12.13.1 **If 'Bent u in de afgelopen 3 maanden met een ambulance naar het ziekenhuis gebracht? (Een andere naam voor ambulance is ziekenauto)' is equal to 'Ja' answer this question:**  
Hoe vaak bent u naar het ziekenhuis gebracht?

keer

8  
9  
10  
11  
12

12.14 Had u in de afgelopen 3 maanden een afspraak bij de polikliniek van het ziekenhuis? (Het gaat om afspraken voor uzelf met een dokter. Bijvoorbeeld met de cardioloog, reumatoloog of neuroloog)

Ja  
 Nee

13  
14  
15  
16  
17  
18  
19  
20  
21

12.14.1 **If 'Had u in de afgelopen 3 maanden een afspraak bij de polikliniek van het ziekenhuis? (Het gaat om afspraken voor uzelf met een dokter. Bijvoorbeeld met de cardioloog, reumatoloog of neuroloog)' is equal to 'Ja' answer this question:**  
Bij welke soorten dokters bent u in de afgelopen 3 maanden in het ziekenhuis geweest? En hoe vaak?

22  
23  
24  
25  
26  
27

12.15 Bent u in de afgelopen 3 maanden overdag in het ziekenhuis geweest voor een behandeling? (U bleef dus niet slapen. U kwam bijvoorbeeld voor een bloedtransfusie, nierdialyse of chemokuur)

Ja  
 Nee

28  
29  
30  
31  
32  
33  
34

12.15.1 **If 'Bent u in de afgelopen 3 maanden overdag in het ziekenhuis geweest voor een behandeling? (U bleef dus niet slapen. U kwam bijvoorbeeld voor een bloedtransfusie, nierdialyse of chemokuur)' is equal to 'Ja' answer this question:**  
Voor welke soort behandeling was dit?

35  
36  
37  
38  
39  
40  
41  
42  
43

12.15.2 **If 'Bent u in de afgelopen 3 maanden overdag in het ziekenhuis geweest voor een behandeling? (U bleef dus niet slapen. U kwam bijvoorbeeld voor een bloedtransfusie, nierdialyse of chemokuur)' is equal to 'Ja' answer this question:**  
Hoeveel keer moest u in de afgelopen 3 maanden voor deze behandelingen naar het ziekenhuis?

44  
45  
46  
47  
48  
49  
50

12.16 Bent u in de afgelopen 3 maanden ergens anders geweest voor een behandeling overdag? (U bleef dus niet slapen. U ging bijvoorbeeld naar de dagopvang van een woon-/zorgcentrum of een psychiatrische instelling. Of naar de dagbehandeling van een revalidatiecentrum)

Ja  
 Nee

51  
52  
53  
54  
55  
56  
57  
58  
59  
60

12.16.1 **If 'Bent u in de afgelopen 3 maanden ergens anders geweest voor een behandeling overdag? (U bleef dus niet slapen. U ging bijvoorbeeld naar de dagopvang van een woon-/zorgcentrum of een psychiatrische instelling. Of naar de dagbehandeling van een revalidatiecentrum)' is equal to 'Ja' answer this question:**  
Wat voor instelling was dit?

Woon-/zorgcentrum  
 Revalidatiecentrum  
 Psychiatrische instelling  
 Een andere instelling, namelijk

- 1  
2  
3  
4  
5  
6  
7
- 12.16.1.1 **If 'Wat voor instelling was dit?' is equal to 'Een andere instelling, namelijk' answer this question:**  
Wat voor instelling was dit?
- 8  
9  
10  
11  
12
- 12.16.1.2 **If 'Wat voor instelling was dit?' is equal to 'Woon-/zorgcentrum' answer this question:**  
Hoe vaak moest u hier in de afgelopen 3 maanden naartoe? Naar het woon-/zorgcentrum:
- 13  
14  
15  
16  
17
- 12.16.1.3 **If 'Wat voor instelling was dit?' is equal to 'Revalidatiecentrum' answer this question:**  
Hoe vaak moest u hier in de afgelopen 3 maanden naartoe? Naar het revalidatiecentrum:
- 18  
19  
20  
21  
22  
23
- 12.16.1.4 **If 'Wat voor instelling was dit?' is equal to 'Psychiatrische instelling' answer this question:**  
Hoe vaak moest u hier in de afgelopen 3 maanden naartoe? Naar de psychiatrische instelling:
- 24  
25  
26  
27  
28
- 12.16.1.5 **If 'Wat voor instelling was dit?' is equal to 'Een andere instelling, namelijk' answer this question:**  
Hoe vaak moest u hier in de afgelopen 3 maanden naartoe? Naar de andere instelling:
- 29  
30  
31  
32  
33
- 12.17 Heeft u in de afgelopen 3 maanden weleens in het ziekenhuis gelegen? (U moest dus blijven slapen. Bijvoorbeeld omdat u geopereerd was en niet meteen naar huis kon)
- 34  
35  
36  
37  
38  
39  
40  
41  
42
- 12.17.1 **If 'Heeft u in de afgelopen 3 maanden weleens in het ziekenhuis gelegen? (U moest dus blijven slapen. Bijvoorbeeld omdat u geopereerd was en niet meteen naar huis kon)' is equal to 'Ja' answer this question:**  
Hoe vaak heeft u in de afgelopen 3 maanden in het ziekenhuis gelegen?
- 43  
44  
45  
46  
47  
48  
49
- 12.17.2 **If 'Heeft u in de afgelopen 3 maanden weleens in het ziekenhuis gelegen? (U moest dus blijven slapen. Bijvoorbeeld omdat u geopereerd was en niet meteen naar huis kon)' is equal to 'Ja' answer this question:**  
Hoe lang heeft u in het ziekenhuis gelegen?
- 50  
51  
52  
53  
54  
55  
56  
57  
58  
59  
60

- 1  
2  
3  
4  
5  
6  
7  
8
- 12.18.1 **If 'Moest u in de afgelopen 3 maanden ergens anders blijven slapen voor uw gezondheid? (Bijvoorbeeld in een woon-/zorgcentrum, psychiatrische instelling of revalidatiecentrum)' is equal to 'Ja' answer this question:**  
Wat voor instelling was dit?
- Woon-/zorgcentrum  
 Revalidatiecentrum  
 Psychiatrische instelling  
 Een andere instelling, namelijk
- 
- 9  
10  
11  
12  
13  
14
- 12.18.1.1 **If 'Wat voor instelling was dit?' is equal to 'Een andere instelling, namelijk' answer this question:**  
Een andere instelling, namelijk
- 
- 
- 15  
16  
17  
18  
19
- 12.18.1.2 **If 'Wat voor instelling was dit?' is equal to 'Woon-/zorgcentrum' answer this question:**  
Hoe lang bent u in deze instelling geweest? In het woon-/zorgcentrum:
- dagen in de afgelopen 3 maanden
- 
- 20  
21  
22  
23  
24  
25
- 12.18.1.3 **If 'Wat voor instelling was dit?' is equal to 'Revalidatiecentrum' answer this question:**  
Hoe lang bent u in deze instelling geweest? In het revalidatiecentrum:
- dagen in de afgelopen 3 maanden
- 
- 26  
27  
28  
29  
30
- 12.18.1.4 **If 'Wat voor instelling was dit?' is equal to 'Psychiatrische instelling' answer this question:**  
Hoe lang bent u in deze instelling geweest? In de psychiatrische instelling:
- dagen in de afgelopen 3 maanden
- 
- 31  
32  
33  
34  
35
- 12.18.1.5 **If 'Wat voor instelling was dit?' is equal to 'Een andere instelling, namelijk' answer this question:**  
Hoe lang bent u in deze instelling geweest? In de andere instelling:
- dagen in de afgelopen 3 maanden
- 
- 36  
37  
38  
39  
40
- 12.19 Heeft u in de afgelopen 3 maanden hulp gekregen van een familielid of een bekende vanwege uw lichamelijke of psychische problemen?
- Ja  
 Nee
- 
- 41  
42  
43  
44  
45  
46  
47  
48  
49  
50  
51  
52  
53  
54  
55  
56  
57  
58  
59  
60
- 12.19.1 **If 'Heeft u in de afgelopen 3 maanden hulp gekregen van een familielid of een bekende vanwege uw lichamelijke of psychische problemen?' is equal to 'Ja' answer this question:**  
Wat voor hulp van familieleden of bekenden heeft u gehad in de afgelopen 3 maanden?
- Huishoudelijke hulp - voorbeeld: stofzuigen, bed opmaken, boodschappen doen, klaarmaken van eten en drinken, verzorgen van kinderen  
 Verzorging van uzelf - voorbeeld: hulp bij douchen of aankleden, hulp bij het eten en drinken of het geven van medicijnen  
 Praktische hulp - voorbeeld: ondersteuning bij wandelen, het maken van uitstapjes of bezoeken aan bekenden, bezoeken aan de huisarts of het ziekenhuis, het regelen van hulp of het regelen van financiële zaken

- 1  
2  
3  
4  
5  
6  
7  
8  
9  
10
- 12.19.1.1 **If 'Wat voor hulp van familieleden of bekenden heeft u gehad in de afgelopen 3 maanden?' is equal to 'Huishoudelijke hulp - voorbeeld: stofzuigen, bed opmaken, boodschappen doen, klaarmaken van eten en drinken, verzorgen van kinderen' answer this question:**  
Hoeveel weken heeft u deze hulp gehad?  
Huishoudelijke hulp:
- weken in de afgelopen 3 maanden
- 
- 11  
12  
13  
14  
15  
16  
17  
18  
19
- 12.19.1.2 **If 'Wat voor hulp van familieleden of bekenden heeft u gehad in de afgelopen 3 maanden?' is equal to 'Verzorging van uzelf - voorbeeld: hulp bij douchen of aankleden, hulp bij het eten en drinken of het geven van medicijnen' answer this question:**  
Hoeveel weken heeft u deze hulp gehad? Verzorging van uzelf:
- weken in de afgelopen 3 maanden
- 
- 20  
21  
22  
23  
24  
25  
26  
27  
28  
29  
30  
31
- 12.19.1.3 **If 'Wat voor hulp van familieleden of bekenden heeft u gehad in de afgelopen 3 maanden?' is equal to 'Praktische hulp - voorbeeld: ondersteuning bij wandelen, het maken van uitstapjes of bezoeken aan bekenden, bezoeken aan de huisarts of het ziekenhuis, het regelen van hulp of het regelen van financiële zaken' answer this question:**  
Hoeveel uur hulp kreeg u in deze weken gemiddeld?  
Praktische hulp:
- weken in de afgelopen 3 maanden
- 
- 32  
33  
34  
35  
36  
37  
38  
39  
40  
41
- 12.19.1.4 **If 'Wat voor hulp van familieleden of bekenden heeft u gehad in de afgelopen 3 maanden?' is equal to 'Huishoudelijke hulp - voorbeeld: stofzuigen, bed opmaken, boodschappen doen, klaarmaken van eten en drinken, verzorgen van kinderen' answer this question:**  
Hoeveel uur hulp kreeg u in deze weken gemiddeld?  
Huishoudelijke hulp: gemiddeld
- uur in de week
- 
- 42  
43  
44  
45  
46  
47  
48  
49
- 12.19.1.5 **If 'Wat voor hulp van familieleden of bekenden heeft u gehad in de afgelopen 3 maanden?' is equal to 'Verzorging van uzelf - voorbeeld: hulp bij douchen of aankleden, hulp bij het eten en drinken of het geven van medicijnen' answer this question:**  
Hoeveel uur hulp kreeg u in deze weken gemiddeld?  
Verzorging van uzelf: gemiddeld
- uur in de week
- 
- 50  
51  
52  
53  
54  
55  
56  
57  
58  
59  
60
- 12.19.1.6 **If 'Wat voor hulp van familieleden of bekenden heeft u gehad in de afgelopen 3 maanden?' is equal to 'Praktische hulp - voorbeeld: ondersteuning bij wandelen, het maken van uitstapjes of bezoeken aan bekenden, bezoeken aan de huisarts of het ziekenhuis, het regelen van hulp of het regelen van financiële zaken' answer this question:**  
Hoeveel uur hulp kreeg u in deze weken gemiddeld?  
Praktische hulp: gemiddeld
- uur in de week

## Vragenlijst PRIMA studie 26 weken - Dank

| Number | Question                                                                                                                                      | Answers              |
|--------|-----------------------------------------------------------------------------------------------------------------------------------------------|----------------------|
| 13.1   | Hartelijk dank voor de tijd die u heeft genomen om de vragenlijsten in te vullen. Indien u nog opmerkingen heeft kunt u deze hierin plaatsen. | <input type="text"/> |

## Survey 'Vragenlijst PRIMA studie 39 weken'

### Vragenlijst PRIMA studie 39 weken - PRODISQ - Gezondheid en werk

| Number | Question                                                                                                                                                                                                                                                                    | Answers                                                                                                                                                                                                                                                                                                                                                                                                                                                                                                                                                                |
|--------|-----------------------------------------------------------------------------------------------------------------------------------------------------------------------------------------------------------------------------------------------------------------------------|------------------------------------------------------------------------------------------------------------------------------------------------------------------------------------------------------------------------------------------------------------------------------------------------------------------------------------------------------------------------------------------------------------------------------------------------------------------------------------------------------------------------------------------------------------------------|
| 1.1    | Wat is uw leeftijd?                                                                                                                                                                                                                                                         | <input type="text"/> jaar                                                                                                                                                                                                                                                                                                                                                                                                                                                                                                                                              |
| 1.2    | Wat is uw geslacht?                                                                                                                                                                                                                                                         | <input type="radio"/> Man<br><input type="radio"/> Vrouw                                                                                                                                                                                                                                                                                                                                                                                                                                                                                                               |
| 1.3    | Wat is de hoogste opleiding die u heeft afgemaakt (Zoek uw hoogste opleiding en kruis het hokje daarvoor aan)?                                                                                                                                                              | <input type="checkbox"/> Ik heb geen school of opleiding afgemaakt<br><input type="checkbox"/> Lagere school of basisschool<br><input type="checkbox"/> Huishoudschool, vbo, lbo, lts, leao of lhno<br><input type="checkbox"/> Mavo, mulo, ivo of vmbo<br><input type="checkbox"/> Mbo, mts, meao, mhno, inas of intas<br><input type="checkbox"/> Havo, vwo, hbs, mms, atheneum of gymnasium<br><input type="checkbox"/> Hbo, hts, heao of hhno<br><input type="checkbox"/> Universiteit<br><input type="checkbox"/> Ik heb een andere opleiding afgemaakt, namelijk |
| 1.3.1  | <b><i>If 'Wat is de hoogste opleiding die u heeft afgemaakt (Zoek uw hoogste opleiding en kruis het hokje daarvoor aan)?' is equal to 'Ik heb een andere opleiding afgemaakt, namelijk' answer this question:</i></b><br>Wat is de hoogste opleiding die u heeft afgemaakt? | <input type="text"/>                                                                                                                                                                                                                                                                                                                                                                                                                                                                                                                                                   |

- 1  
2  
3  
4  
5  
6  
7  
8  
9  
10  
11  
12  
13
- 1.4 Wat doet u in het dagelijks leven?
- Ik zit op school, ik studeer
- Ik werk in loondienst
- Ik ben zelfstandig ondernemer
- Ik ben huisvrouw, huisman
- Ik ben werkloos
- Ik ben arbeidsongeschikt
- Ik ben met pensioen of prepensioen
- Ik doe iets anders, namelijk

14  
15  
16  
17

1.4.1 ***If 'Wat doet u in het dagelijks leven?' is equal to 'Ik ben arbeidsongeschikt' answer this question:***

Wat doet u in het dagelijks leven?

18  
19  
20  
21  
22  
23

1.4.2 ***If 'Wat doet u in het dagelijks leven?' is equal to 'Ik doe iets anders, namelijk' answer this question:***

Wat doet u in het dagelijks leven?

24  
25  
26  
27  
28

1.5 Hebt u betaald werk?

Nee

Ja

29  
30  
31  
32

1.5.1 ***If 'Hebt u betaald werk?' is equal to 'Ja' answer this question:***

Wat is uw beroep?

33  
34  
35  
36  
37

1.5.2 ***If 'Hebt u betaald werk?' is equal to 'Ja' answer this question:***

Hoeveel uur per week werkt u (Tel alleen de uren waarvoor u betaald wordt)?

 uren

38  
39  
40  
41  
42

1.5.3 ***If 'Hebt u betaald werk?' is equal to 'Ja' answer this question:***

Hoeveel dagen in de week werkt u?

 Dagen

43  
44  
45  
46  
47

1.5.4 ***If 'Hebt u betaald werk?' is equal to 'Ja' answer this question:***

Bent u in de afgelopen 4 weken afwezig geweest van uw werk omdat u ziek was?

Nee

Ja

48  
49  
50  
51  
52  
53  
54

1.5.4.1 ***If 'Bent u in de afgelopen 4 weken afwezig geweest van uw werk omdat u ziek was?' is equal to 'Ja' answer this question:***

Bent u in de afgelopen 4 weken afwezig geweest van uw werk omdat u ziek was (Tel alleen de werkdagen in de afgelopen 4 weken)?

 dagen afwezig geweest

55  
56  
57  
58  
59  
60

1.5.4.2 ***If 'Bent u in de afgelopen 4 weken afwezig geweest van uw werk omdat u ziek was?' is equal to 'Ja' answer this question:***

Was u langer dan de gehele periode van 4 weken afwezig van uw werk doordat u ziek was?

Nee

Ja



- 1  
2  
3  
4  
5  
6  
7  
8  
9  
10  
11  
12  
13  
14  
15  
16  
17  
18  
19  
20  
21  
22  
23  
24  
25  
26  
27  
28  
29  
30  
31  
32  
33  
34  
35  
36  
37  
38  
39  
40  
41  
42  
43  
44  
45  
46  
47  
48  
49  
50  
51  
52  
53  
54  
55  
56  
57  
58  
59  
60
- 1.5.4.2.1 **If 'Was u langer dan de gehele periode van 4 weken afwezig van uw werk doordat u ziek was?' is equal to 'Ja' answer this question:**    (dd-mm-yyyy)  
Wanneer heeft u zich ziek gemeld?
- 1.5.5 **If 'Hebt u betaald werk?' is equal to 'Ja' answer this question:**  Ja  
 Nee  
Waren er in de afgelopen 4 weken, dagen waarop u wel gewerkt heeft, maar tijdens uw werk last had van lichamelijke of psychische problemen?
- 1.5.5.1 **If 'Waren er in de afgelopen 4 weken, dagen waarop u wel gewerkt heeft, maar tijdens uw werk last had van lichamelijke of psychische problemen?' is equal to 'Ja' answer this question:**  werkdagen  
Op hoeveel werkdagen had u tijdens uw werk last van uw lichamelijke of psychische problemen?
- 1.5.5.2 **If 'Waren er in de afgelopen 4 weken, dagen waarop u wel gewerkt heeft, maar tijdens uw werk last had van lichamelijke of psychische problemen?' is equal to 'Ja' answer this question:** Ik kon Ik kon  
op net  
deze zoveel  
dagen doen  
Op de dagen dat u last had, kon u misschien niet niks als  
doen normaal  
deze dagen gemiddeld doen? (0.00) (10.00)
- 1.6 Waren er dagen waarop u minder onbetaald werk kon doen door uw lichamelijke of psychische problemen?  Nee  
 Ja
- 1.6.1 **If 'Waren er dagen waarop u minder onbetaald werk kon doen door uw lichamelijke of psychische problemen?' is equal to 'Ja' answer this question:**  Dagen  
Op hoeveel dagen was dit zo?
- 1.6.2 **If 'Waren er dagen waarop u minder onbetaald werk kon doen door uw lichamelijke of psychische problemen?' is equal to 'Ja' answer this question:**  uur op deze  
dagen  
Stel dat iemand, bijvoorbeeld uw partner, familielid of een bekende, u op deze dagen had geholpen. En al het onbetaalde werk wat u niet kon doen, voor u had gedaan. Hoeveel uur was die persoon hier op deze dagen dan gemiddeld mee bezig geweest?

## Vragenlijst PRIMA studie 39 weken - PRODISQ - Zorggebruik

| Number | Question | Answers |
|--------|----------|---------|
|--------|----------|---------|

Wij willen graag weten met welke dokters u in de afgelopen 3 maanden een afspraak had. Het gaat om afspraken voor uzelf. Ook andere zorgverleners tellen mee. Bijvoorbeeld de fysiotherapeut.

- 1  
2  
3  
4  
5
- 2.1 Bent u in de afgelopen 3 maanden naar uw huisarts geweest?  Nee  
 Ja
- 
- 6  
7  
8  
9  
10  
11
- 2.1.1 ***If 'Bent u in de afgelopen 3 maanden naar uw huisarts geweest?' is equal to 'Ja' answer this question:***  afspraken  
Hoeveel afspraken had u?
- 
- 12  
13  
14  
15
- 2.2 Bent u in de afgelopen 3 maanden in contact geweest met een maatschappelijk werker?  Nee  
 Ja
- 
- 16  
17  
18  
19  
20  
21
- 2.2.1 ***If 'Bent u in de afgelopen 3 maanden in contact geweest met een maatschappelijk werker?' is equal to 'Ja' answer this question:***  afspraken  
Hoeveel afspraken had u?
- 
- 22  
23  
24  
25
- 2.3 Bent u in de afgelopen 3 maanden naar een fysiotherapeut geweest? Of een caesartherapeut, therapeut mensendieck of een manueel therapeut?  Nee  
 Ja
- 
- 26  
27  
28  
29  
30  
31
- 2.3.1 ***If 'Bent u in de afgelopen 3 maanden naar een fysiotherapeut geweest? Of een caesartherapeut, therapeut mensendieck of een manueel therapeut?' is equal to 'Ja' answer this question:***  afspraken  
Hoeveel afspraken had u?
- 
- 32  
33  
34  
35  
36
- 2.4 Bent u in de afgelopen 3 maanden naar een ergotherapeut geweest?  Nee  
 Ja
- 
- 37  
38  
39  
40  
41
- 2.4.1 ***If 'Bent u in de afgelopen 3 maanden naar een ergotherapeut geweest?' is equal to 'Ja' answer this question:***  afspraken  
Hoeveel afspraken had u?
- 
- 42  
43  
44  
45
- 2.5 Bent u in de afgelopen 3 maanden naar een logopedist geweest?  Nee  
 Ja
- 
- 46  
47  
48  
49  
50  
51
- 2.5.1 ***If 'Bent u in de afgelopen 3 maanden naar een logopedist geweest?' is equal to 'Ja' answer this question:***  afspraken  
Hoeveel afspraken had u?
- 
- 52  
53  
54  
55
- 2.6 Bent u in de afgelopen 3 maanden naar een diëtist geweest?  Nee  
 Ja
- 
- 56  
57  
58  
59  
60
- 2.6.1 ***If 'Bent u in de afgelopen 3 maanden naar een diëtist geweest?' is equal to 'Ja' answer this question:***  afspraken  
Hoeveel afspraken had u?

1  
2  
3  
4  
5  
6  
7  
8  
9  
10  
11  
12  
13  
14  
15  
16  
17  
18  
19  
20  
21  
22  
23  
24  
25  
26  
27  
28  
29  
30  
31  
32  
33  
34  
35  
36  
37  
38  
39  
40  
41  
42  
43  
44  
45  
46  
47  
48  
49  
50  
51  
52  
53  
54  
55  
56  
57  
58  
59  
60

|          |                                                                                                                                                                                                                                                                           |                                                                                                                                                                                                                                                                                                     |
|----------|---------------------------------------------------------------------------------------------------------------------------------------------------------------------------------------------------------------------------------------------------------------------------|-----------------------------------------------------------------------------------------------------------------------------------------------------------------------------------------------------------------------------------------------------------------------------------------------------|
| 2.7      | Bent u in de afgelopen 3 maanden naar een homeopaat geweest? Of een acupuncturist?                                                                                                                                                                                        | <input type="radio"/> Nee<br><input type="radio"/> Ja                                                                                                                                                                                                                                               |
| 2.7.1    | <b>If 'Bent u in de afgelopen 3 maanden naar een homeopaat geweest? Of een acupuncturist?' is equal to 'Ja' answer this question:</b><br>Hoeveel afspraken had u?                                                                                                         | <input type="text"/> afspraken                                                                                                                                                                                                                                                                      |
| 2.8      | Bent u in de afgelopen 3 maanden naar een psycholoog geweest? Of een psychotherapeut of psychiater?                                                                                                                                                                       | <input type="radio"/> Nee<br><input type="radio"/> Ja                                                                                                                                                                                                                                               |
| 2.8.1    | <b>If 'Bent u in de afgelopen 3 maanden naar een psycholoog geweest? Of een psychotherapeut of psychiater?' is equal to 'Ja' answer this question:</b><br>Hoeveel afspraken had u?                                                                                        | <input type="text"/> afspraken                                                                                                                                                                                                                                                                      |
| 2.9      | Heeft u in de afgelopen 3 maanden afspraken gehad met de bedrijfsarts?                                                                                                                                                                                                    | <input type="radio"/> Nee<br><input type="radio"/> Ja                                                                                                                                                                                                                                               |
| 2.9.1    | <b>If 'Heeft u in de afgelopen 3 maanden afspraken gehad met de bedrijfsarts?' is equal to 'Ja' answer this question:</b><br>Hoeveel afspraken had u?                                                                                                                     | <input type="text"/> afspraken                                                                                                                                                                                                                                                                      |
| 2.10     | Heeft u in de afgelopen 3 maanden hulp van de thuiszorg gehad?                                                                                                                                                                                                            | <input type="radio"/> Ja<br><input type="radio"/> Nee                                                                                                                                                                                                                                               |
| 2.10.1   | <b>If 'Heeft u in de afgelopen 3 maanden hulp van de thuiszorg gehad?' is equal to 'Ja' answer this question:</b><br>Wat voor hulp van de thuiszorg heeft u gehad in de afgelopen 3 maanden?                                                                              | <input type="checkbox"/> Huishoudelijke hulp; voorbeeld: stofzuigen, bed opmaken, boodschappen doen<br><input type="checkbox"/> Verzorging van uzelf; voorbeeld: hulp bij douchen of aankleden<br><input type="checkbox"/> Verpleging; voorbeeld: verband omdoen, medicijnen geven, bloeddruk meten |
| 2.10.1.1 | <b>If 'Wat voor hulp van de thuiszorg heeft u gehad in de afgelopen 3 maanden?' is equal to 'Huishoudelijke hulp; voorbeeld: stofzuigen, bed opmaken, boodschappen doen' answer this question:</b><br>Hoeveel weken heeft u deze thuiszorg gehad?<br>Huishoudelijke hulp: | <input type="text"/> weken in de afgelopen 3 maanden                                                                                                                                                                                                                                                |
| 2.10.1.2 | <b>If 'Wat voor hulp van de thuiszorg heeft u gehad in de afgelopen 3 maanden?' is equal to 'Verzorging van uzelf; voorbeeld: hulp bij douchen of aankleden' answer this question:</b><br>Hoeveel weken heeft u deze thuiszorg gehad?<br>Verzorging van uzelf:            | <input type="text"/> weken in de afgelopen 3 maanden                                                                                                                                                                                                                                                |

- 1  
2  
3  
4  
5  
6  
7  
8
- 2.10.1.3 **If 'Wat voor hulp van de thuiszorg heeft u gehad in de afgelopen 3 maanden?' is equal to 'Verpleging; voorbeeld: verband omdoen, medicijnen geven, bloeddruk meten' answer this question:**  
Hoeveel weken heeft u deze thuiszorg gehad?  
Verpleging:  weken in de afgelopen 3 maanden
- 9  
10  
11  
12  
13  
14  
15  
16  
17
- 2.10.1.4 **If 'Wat voor hulp van de thuiszorg heeft u gehad in de afgelopen 3 maanden?' is equal to 'Huishoudelijke hulp; voorbeeld: stofzuigen, bed opmaken, boodschappen doen' answer this question:**  
Hoeveel uur thuiszorg kreeg u in deze weken gemiddeld? Huishoudelijke hulp: gemiddeld  uur in de week
- 18  
19  
20  
21  
22  
23  
24  
25
- 2.10.1.5 **If 'Wat voor hulp van de thuiszorg heeft u gehad in de afgelopen 3 maanden?' is equal to 'Verzorging van uzelf; voorbeeld: hulp bij douchen of aankleden' answer this question:**  
Hoeveel uur thuiszorg kreeg u in deze weken gemiddeld? Verzorging van uzelf: gemiddeld  uur in de week
- 26  
27  
28  
29  
30  
31  
32
- 2.10.1.6 **If 'Wat voor hulp van de thuiszorg heeft u gehad in de afgelopen 3 maanden?' is equal to 'Verpleging; voorbeeld: verband omdoen, medicijnen geven, bloeddruk meten' answer this question:**  
Hoeveel uur thuiszorg kreeg u in deze weken gemiddeld? Verpleging: gemiddeld  uur in de week
- 33  
34  
35  
36
- 2.11 Heeft u in de afgelopen 3 maanden medicijnen gebruikt?  Ja  Nee
- 37  
38  
39  
40  
41  
42
- 2.11.1 **If 'Heeft u in de afgelopen 3 maanden medicijnen gebruikt?' is equal to 'Ja' answer this question:**  
Welke medicijnen heeft u in de afgelopen 3 maanden gebruikt?
- 43  
44  
45  
46  
47
- 2.12 Bent u in de afgelopen 3 maanden op de spoedeisende eerste hulp van een ziekenhuis geweest? (Een andere naam voor spoedeisende eerste hulp is EHBO)  Nee  Ja
- 48  
49  
50  
51  
52  
53  
54  
55
- 2.12.1 **If 'Bent u in de afgelopen 3 maanden op de spoedeisende eerste hulp van een ziekenhuis geweest? (Een andere naam voor spoedeisende eerste hulp is EHBO)' is equal to 'Ja' answer this question:**  
Hoe vaak bent u geweest?  keer
- 56  
57  
58  
59  
60
- 2.13 Bent u in de afgelopen 3 maanden met een ambulance naar het ziekenhuis gebracht? (Een andere naam voor ambulance is ziekenauto)  Nee  Ja

1  
2  
3  
4  
5  
6  
7

2.13.1 **If 'Bent u in de afgelopen 3 maanden met een ambulance naar het ziekenhuis gebracht? (Een andere naam voor ambulance is ziekenauto)' is equal to 'Ja' answer this question:**  
Hoe vaak bent u naar het ziekenhuis gebracht?

keer

8  
9  
10  
11  
12

2.14 Had u in de afgelopen 3 maanden een afspraak bij de polikliniek van het ziekenhuis? (Het gaat om afspraken voor uzelf met een dokter. Bijvoorbeeld met de cardioloog, reumatoloog of neuroloog)

Ja  
 Nee

13  
14  
15  
16  
17  
18  
19  
20  
21

2.14.1 **If 'Had u in de afgelopen 3 maanden een afspraak bij de polikliniek van het ziekenhuis? (Het gaat om afspraken voor uzelf met een dokter. Bijvoorbeeld met de cardioloog, reumatoloog of neuroloog)' is equal to 'Ja' answer this question:**  
Bij welke soorten dokters bent u in de afgelopen 3 maanden in het ziekenhuis geweest? En hoe vaak?

22  
23  
24  
25  
26

2.15 Bent u in de afgelopen 3 maanden overdag in het ziekenhuis geweest voor een behandeling? (U bleef dus niet slapen. U kwam bijvoorbeeld voor een bloedtransfusie, nierdialyse of chemokuur)

Ja  
 Nee

27  
28  
29  
30  
31  
32  
33  
34

2.15.1 **If 'Bent u in de afgelopen 3 maanden overdag in het ziekenhuis geweest voor een behandeling? (U bleef dus niet slapen. U kwam bijvoorbeeld voor een bloedtransfusie, nierdialyse of chemokuur)' is equal to 'Ja' answer this question:**  
Voor welke soort behandeling was dit?

35  
36  
37  
38  
39  
40  
41  
42

2.15.2 **If 'Bent u in de afgelopen 3 maanden overdag in het ziekenhuis geweest voor een behandeling? (U bleef dus niet slapen. U kwam bijvoorbeeld voor een bloedtransfusie, nierdialyse of chemokuur)' is equal to 'Ja' answer this question:**  
Hoeveel keer moest u in de afgelopen 3 maanden voor deze behandelingen naar het ziekenhuis?

43  
44  
45  
46  
47  
48  
49

2.16 Bent u in de afgelopen 3 maanden ergens anders geweest voor een behandeling overdag? (U bleef dus niet slapen. U ging bijvoorbeeld naar de dagopvang van een woon-/zorgcentrum of een psychiatrische instelling. Of naar de dagbehandeling van een revalidatiecentrum)

Ja  
 Nee

50  
51  
52  
53  
54  
55  
56  
57  
58  
59  
60

2.16.1 **If 'Bent u in de afgelopen 3 maanden ergens anders geweest voor een behandeling overdag? (U bleef dus niet slapen. U ging bijvoorbeeld naar de dagopvang van een woon-/zorgcentrum of een psychiatrische instelling. Of naar de dagbehandeling van een revalidatiecentrum)' is equal to 'Ja' answer this question:**  
Wat voor instelling was dit?

Woon-/zorgcentrum  
 Revalidatiecentrum  
 Psychiatrische instelling  
 Een andere instelling, namelijk

1  
2  
3  
4  
5  
6  
7  
8  
9  
10  
11  
12  
13  
14  
15  
16  
17  
18  
19  
20  
21  
22  
23  
24  
25  
26  
27  
28  
29  
30  
31  
32  
33  
34  
35  
36  
37  
38  
39  
40  
41  
42  
43  
44  
45  
46  
47  
48  
49  
50  
51  
52  
53  
54  
55  
56  
57  
58  
59  
60

|          |                                                                                                                                                                                                                                                                                                 |                                                       |
|----------|-------------------------------------------------------------------------------------------------------------------------------------------------------------------------------------------------------------------------------------------------------------------------------------------------|-------------------------------------------------------|
| 2.16.1.1 | <b>If 'Wat voor instelling was dit?' is equal to 'Een andere instelling, namelijk' answer this question:</b><br>Wat voor instelling was dit?                                                                                                                                                    | <input type="text"/>                                  |
| 2.16.1.2 | <b>If 'Wat voor instelling was dit?' is equal to 'Woon-/zorgcentrum' answer this question:</b><br>Hoe vaak moest u hier in de afgelopen 3 maanden naartoe? Naar het woon-/zorgcentrum:                                                                                                          | <input type="text"/> keer in de afgelopen 3 maanden   |
| 2.16.1.3 | <b>If 'Wat voor instelling was dit?' is equal to 'Revalidatiecentrum' answer this question:</b><br>Hoe vaak moest u hier in de afgelopen 3 maanden naartoe? Naar het revalidatiecentrum:                                                                                                        | <input type="text"/> keer in de afgelopen 3 maanden   |
| 2.16.1.4 | <b>If 'Wat voor instelling was dit?' is equal to 'Psychiatrische instelling' answer this question:</b><br>Hoe vaak moest u hier in de afgelopen 3 maanden naartoe? Naar de psychiatrische instelling:                                                                                           | <input type="text"/> keer in de afgelopen 3 maanden   |
| 2.16.1.5 | <b>If 'Wat voor instelling was dit?' is equal to 'Een andere instelling, namelijk' answer this question:</b><br>Hoe vaak moest u hier in de afgelopen 3 maanden naartoe? Naar de andere instelling:                                                                                             | <input type="text"/> keer in de afgelopen 3 maanden   |
| 2.17     | Heeft u in de afgelopen 3 maanden weleens in het ziekenhuis gelegen? (U moest dus blijven slapen. Bijvoorbeeld omdat u geopereerd was en niet meteen naar huis kon)                                                                                                                             | <input type="radio"/> Ja<br><input type="radio"/> Nee |
| 2.17.1   | <b>If 'Heeft u in de afgelopen 3 maanden weleens in het ziekenhuis gelegen? (U moest dus blijven slapen. Bijvoorbeeld omdat u geopereerd was en niet meteen naar huis kon)' is equal to 'Ja' answer this question:</b><br>Hoe vaak heeft u in de afgelopen 3 maanden in het ziekenhuis gelegen? | <input type="text"/> keer in de afgelopen 3 maanden   |
| 2.17.2   | <b>If 'Heeft u in de afgelopen 3 maanden weleens in het ziekenhuis gelegen? (U moest dus blijven slapen. Bijvoorbeeld omdat u geopereerd was en niet meteen naar huis kon)' is equal to 'Ja' answer this question:</b><br>Hoe lang heeft u in het ziekenhuis gelegen?                           | <input type="text"/> dagen in de afgelopen 3 maanden  |
| 2.18     | Moest u in de afgelopen 3 maanden ergens anders blijven slapen voor uw gezondheid? (Bijvoorbeeld in een woon-/zorgcentrum, psychiatrische instelling of revalidatiecentrum)                                                                                                                     | <input type="radio"/> Ja<br><input type="radio"/> Nee |

- 1  
2  
3  
4  
5  
6  
7  
8  
9  
10  
11  
12  
13  
14  
15  
16  
17  
18  
19  
20  
21  
22  
23  
24  
25  
26  
27  
28  
29  
30  
31  
32  
33  
34  
35  
36  
37  
38  
39  
40  
41  
42  
43  
44  
45  
46  
47  
48  
49  
50  
51  
52  
53  
54  
55  
56  
57  
58  
59  
60
- 
- 2.18.1 **If 'Moest u in de afgelopen 3 maanden ergens anders blijven slapen voor uw gezondheid? (Bijvoorbeeld in een woon-/zorgcentrum, psychiatrische instelling of revalidatiecentrum)' is equal to 'Ja' answer this question:**  
Wat voor instelling was dit?
- Woon-/zorgcentrum  
 Revalidatiecentrum  
 Psychiatrische instelling  
 Een andere instelling, namelijk
- 
- 2.18.1.1 **If 'Wat voor instelling was dit?' is equal to 'Een andere instelling, namelijk' answer this question:**  
Een andere instelling, namelijk
- 
- 
- 2.18.1.2 **If 'Wat voor instelling was dit?' is equal to 'Woon-/zorgcentrum' answer this question:**  
Hoe lang bent u in deze instelling geweest? In het woon-/zorgcentrum:
- dagen in de afgelopen 3 maanden
- 
- 2.18.1.3 **If 'Wat voor instelling was dit?' is equal to 'Revalidatiecentrum' answer this question:**  
Hoe lang bent u in deze instelling geweest? In het revalidatiecentrum:
- dagen in de afgelopen 3 maanden
- 
- 2.18.1.4 **If 'Wat voor instelling was dit?' is equal to 'Psychiatrische instelling' answer this question:**  
Hoe lang bent u in deze instelling geweest? In de psychiatrische instelling:
- dagen in de afgelopen 3 maanden
- 
- 2.18.1.5 **If 'Wat voor instelling was dit?' is equal to 'Een andere instelling, namelijk' answer this question:**  
Hoe lang bent u in deze instelling geweest? In de andere instelling:
- dagen in de afgelopen 3 maanden
- 
- 2.19 Heeft u in de afgelopen 3 maanden hulp gekregen van een familielid of een bekende vanwege uw lichamelijke of psychische problemen?
- Ja  
 Nee
- 
- 2.19.1 **If 'Heeft u in de afgelopen 3 maanden hulp gekregen van een familielid of een bekende vanwege uw lichamelijke of psychische problemen?' is equal to 'Ja' answer this question:**  
Wat voor hulp van familieleden of bekenden heeft u gehad in de afgelopen 3 maanden?
- Huishoudelijke hulp - voorbeeld: stofzuigen, bed opmaken, boodschappen doen, klaarmaken van eten en drinken, verzorgen van kinderen  
 Verzorging van uzelf - voorbeeld: hulp bij douchen of aankleden, hulp bij het eten en drinken of het geven van medicijnen  
 Praktische hulp - voorbeeld: ondersteuning bij wandelen, het maken van uitstapjes of bezoeken aan bekenden, bezoeken aan de huisarts of het ziekenhuis, het regelen van hulp of het regelen van financiële zaken

- 1  
2  
3  
4  
5  
6  
7  
8  
9  
10
- 2.19.1.1 **If 'Wat voor hulp van familieleden of bekenden heeft u gehad in de afgelopen 3 maanden?' is equal to 'Huishoudelijke hulp - voorbeeld: stofzuigen, bed opmaken, boodschappen doen, klaarmaken van eten en drinken, verzorgen van kinderen' answer this question:**  
Hoeveel weken heeft u deze hulp gehad?  
Huishoudelijke hulp:
- weken in de afgelopen 3 maanden
- 
- 11  
12  
13  
14  
15  
16  
17  
18  
19
- 2.19.1.2 **If 'Wat voor hulp van familieleden of bekenden heeft u gehad in de afgelopen 3 maanden?' is equal to 'Verzorging van uzelf - voorbeeld: hulp bij douchen of aankleden, hulp bij het eten en drinken of het geven van medicijnen' answer this question:**  
Hoeveel weken heeft u deze hulp gehad? Verzorging van uzelf:
- weken in de afgelopen 3 maanden
- 
- 20  
21  
22  
23  
24  
25  
26  
27  
28  
29  
30  
31
- 2.19.1.3 **If 'Wat voor hulp van familieleden of bekenden heeft u gehad in de afgelopen 3 maanden?' is equal to 'Praktische hulp - voorbeeld: ondersteuning bij wandelen, het maken van uitstapjes of bezoeken aan bekenden, bezoeken aan de huisarts of het ziekenhuis, het regelen van hulp of het regelen van financiële zaken' answer this question:**  
Hoeveel uur hulp kreeg u in deze weken gemiddeld?  
Praktische hulp:
- weken in de afgelopen 3 maanden
- 
- 32  
33  
34  
35  
36  
37  
38  
39  
40  
41
- 2.19.1.4 **If 'Wat voor hulp van familieleden of bekenden heeft u gehad in de afgelopen 3 maanden?' is equal to 'Huishoudelijke hulp - voorbeeld: stofzuigen, bed opmaken, boodschappen doen, klaarmaken van eten en drinken, verzorgen van kinderen' answer this question:**  
Hoeveel uur hulp kreeg u in deze weken gemiddeld?  
Huishoudelijke hulp: gemiddeld
- uur in de week
- 
- 42  
43  
44  
45  
46  
47  
48  
49
- 2.19.1.5 **If 'Wat voor hulp van familieleden of bekenden heeft u gehad in de afgelopen 3 maanden?' is equal to 'Verzorging van uzelf - voorbeeld: hulp bij douchen of aankleden, hulp bij het eten en drinken of het geven van medicijnen' answer this question:**  
Hoeveel uur hulp kreeg u in deze weken gemiddeld?  
Verzorging van uzelf: gemiddeld
- uur in de week
- 
- 50  
51  
52  
53  
54  
55  
56  
57  
58  
59  
60
- 2.19.1.6 **If 'Wat voor hulp van familieleden of bekenden heeft u gehad in de afgelopen 3 maanden?' is equal to 'Praktische hulp - voorbeeld: ondersteuning bij wandelen, het maken van uitstapjes of bezoeken aan bekenden, bezoeken aan de huisarts of het ziekenhuis, het regelen van hulp of het regelen van financiële zaken' answer this question:**  
Hoeveel uur hulp kreeg u in deze weken gemiddeld?  
Praktische hulp: gemiddeld
- uur in de week



## Vragenlijst PRIMA studie 39 weken - Dank

| Number | Question                                                                                                                                      | Answers                                                                  |
|--------|-----------------------------------------------------------------------------------------------------------------------------------------------|--------------------------------------------------------------------------|
| 3.1    | Hartelijk dank voor de tijd die u heeft genomen om de vragenlijsten in te vullen. Indien u nog opmerkingen heeft kunt u deze hierin plaatsen. | <div style="border: 1px dashed black; height: 60px; width: 100%;"></div> |

## Survey 'Vragenlijst PRIMA studie 5 jaar'

### Vragenlijst PRIMA studie 5 jaar - AOFAS - Pijn

| Number | Question                            | Answers                                                                                                                                                                                                         |
|--------|-------------------------------------|-----------------------------------------------------------------------------------------------------------------------------------------------------------------------------------------------------------------|
| 1.1    | Hoeveel pijn ervaart u aan uw voet? | <input type="checkbox"/> Geen<br><input type="checkbox"/> Milde pijnklachten of af en toe pijn<br><input type="checkbox"/> Matige pijnklachten, dagelijks<br><input type="checkbox"/> Vrijwel continu erge pijn |

### Vragenlijst PRIMA studie 5 jaar - AOFAS resterende gedeelte

| Number | Question                                              | Answers                                                                                                                                                                                                                                                                                                                                                                                                                                           |
|--------|-------------------------------------------------------|---------------------------------------------------------------------------------------------------------------------------------------------------------------------------------------------------------------------------------------------------------------------------------------------------------------------------------------------------------------------------------------------------------------------------------------------------|
| 2.1    | Hoeveel beperkingen in het dagelijks leven ervaart u? | <input type="radio"/> Geen beperkingen, geen hulpmiddelen nodig<br><input type="radio"/> Geen beperkingen in algemeen dagelijkse bezigheden, wel beperkingen in recreatieve activiteiten (sport, hobbies, etc) geen ondersteuning<br><input type="radio"/> Beperkingen bij dagelijkse- en recreatieve activiteiten, stok<br><input type="radio"/> Ernstige beperkingen bij dagelijkse- en recreatieactiviteiten, walker, krukken, rolstoel, brace |

- 1  
2  
3  
4  
5  
6  
7  
8
- 
- 2.2 Wat is de afstand die u in één keer kunt lopen?
- Meer dan 600 meter
  - 400 - 600 meter
  - 100 - 300 meter
  - Minder dan 100 meter
- 
- 9  
10  
11  
12  
13  
14  
15  
16
- 2.3 Heeft u moeite met lopen op een bepaalde ondergrond?
- Geen problemen bij lopen
  - Enig problemen op ongelijke ondergrond, trap, helling, ladders
  - Ernstige problemen bij ongelijke ondergrond, trap, helling, ladders
- 
- 17  
18  
19  
20  
21  
22
- 2.4 Hoe zou u uw looppatroon beoordelen?
- Normaal of minimaal afwijkend
  - Duidelijk
  - Ernstig
- 
- 23  
24  
25  
26  
27  
28  
29
- 2.5 Hoe zou u de beweeglijkheid van uw voet beoordelen ten opzichte van de andere zijde of ten opzichte van vóór het ongeval?
- Hetzelfde of licht beperkt t.o.v. de niet aangedane zijde of zoals voor het ongeval
  - Ongeveer de helft beperkt
  - Sterk verminderd, bijna geen bewegingen mogelijk
- 
- 30  
31  
32  
33  
34  
35  
36  
37
- 2.6 Hoe zou u de beweeglijkheid van uw enkel beoordelen ten opzichte van de andere zijde of ten opzichte van voor het ongeval?
- Hetzelfde of licht beperkt t.o.v. de niet aangedane zijde of zoals voor het ongeval
  - Ongeveer de helft beperkt
  - Sterk verminderd, bijna geen bewegingen mogelijk
- 
- 38  
39  
40  
41  
42  
43
- 2.7 Hoe zou u de stabiliteit van uw voet en enkel beoordelen
- Stabiel, ik verzwik mijn enkel hooguit incidenteel
  - Niet stabiel, ik verzwik mijn enkel vaak
- 
- 44  
45  
46  
47  
48  
49  
50  
51  
52  
53  
54  
55  
56  
57  
58  
59  
60
- 2.8 Hoe zou u de stand van uw voet beoordelen ten opzichte van de andere zijde of ten opzichte van voor het ongeval?
- Goed, ik kan mijn voet goed plat op de grond zetten, waarbij de stand niet afwijkend is
  - Ik sta vrijwel alleen op de buitenzijde van mijn voet
  - Ik kan mijn voet niet plat op de grond zetten en loop vrijwel alleen op mijn voorvoet

## Vragenlijst PRIMA studie 5 jaar - VAS Pain score

1  
2  
3  
4  
5  
6  
7  
8  
9  
10  
11  
12  
13  
14  
15  
16  
17  
18  
19  
20  
21  
22  
23  
24  
25  
26  
27  
28  
29  
30  
31  
32  
33  
34  
35  
36  
37  
38  
39  
40  
41  
42  
43  
44  
45  
46  
47  
48  
49  
50  
51  
52  
53  
54  
55  
56  
57  
58  
59  
60

| Number | Question                                                                                                                                                             | Answers             |
|--------|----------------------------------------------------------------------------------------------------------------------------------------------------------------------|---------------------|
| 3.1    | VAS pijnscore (Geef uw minimaal pijnscore aan tijdens dagelijkse activiteiten op een schaal van 0 tot 100, waarbij 0 geen pijn is en 100 de ergste pijn denkbaar is) | (0.00) 100 (100.00) |

## Vragenlijst PRIMA studie 5 jaar - AAS

| Number | Question | Answers |
|--------|----------|---------|
|--------|----------|---------|

- 1  
2  
3  
4  
5  
6  
7  
8  
9  
10  
11  
12  
13  
14  
15  
16  
17  
18  
19  
20  
21  
22  
23  
24  
25  
26  
27  
28  
29  
30  
31  
32  
33  
34  
35  
36  
37  
38  
39  
40  
41  
42  
43  
44  
45  
46  
47  
48  
49  
50  
51  
52  
53  
54  
55  
56  
57  
58  
59  
60
- 4.1 Wat is het meest bij u van toepassing ten aanzien van uw activiteit?
- American Football
  - Basketbal
  - Gymnastiek/turnen
  - Handbal
  - Rugby
  - Voetbal
  - Hockey
  - Korfbal
  - Gevechtssporten: judo, karate, kung fu, taekwando, jiu jitsu, etc.
  - Oriëntatiewandelen
  - Rhythmische gymnastiek
  - Volleybal
  - Boxen
  - Freestyle snowboarden
  - IJshockey
  - Tennis
  - Worstelen
  - Fitness, aerobics
  - Badminton
  - Baseball
  - Cross-country hardlopen
  - Moderne pentathlon
  - Squash
  - Surfen, windsurfen
  - Tafel tennis
  - Atletiek: spring-, werponderdelen
  - Waterskiën
  - Dans
  - Schermen
  - Zaalhockey
  - Bergbeklimmen
  - Langlauf
  - Parachute springen
  - Softball
  - Speciale beroepen en werkactiviteiten; speciale beroepen: ballet, professioneel soldaat, speciale reddingswerker, stuntman, etc.
  - Duiken
  - Scubaduiken
  - Skaten, in-line skaten
  - Atletiek: looponderdelen
  - Triatlon
  - Gewichtsheffen, body-building

- Alle competitieve sporten hieronder met 'seasonal' conditioning
- Zwaar fysiek werk
- Alpine skiën en snowboarden
- Bowlen/curlen
- Golf
- Mountainbike/BMX
- Powerliften
- Zeilen
- Fysiek werk
- Wielrennen
- Paardrijden
- Motorsporten/technische sporten
- Roeien, kayakken
- Boogschieten
- Water polo en zwemmen
- Kunnen lopen op oneven grond
- Geen sport, echter geen limitatie in dagelijkse activiteiten
- Kunnen lopen op even grond, maar de dagelijkse activiteiten zijn gelimiteerd
- Niet kunnen lopen, fysieke handicap wegens enkelproblemen

- 
- 4.1.1 ***If 'Wat is het meest bij u van toepassing ten aanzien van uw acitviteit?' is equal to 'American Football' answer this question:***  
American Football
- Professioneel
- Competitief
- Recreatief
- 
- 4.1.2 ***If 'Wat is het meest bij u van toepassing ten aanzien van uw acitviteit?' is equal to 'Basketbal' answer this question:***  
Basketbal
- Professioneel
- Competitief
- Recreatief
- 
- 4.1.3 ***If 'Wat is het meest bij u van toepassing ten aanzien van uw acitviteit?' is equal to 'Gymnastiek/turnen' answer this question:***  
Gymnastiek/turnen
- Professioneel
- Competitief
- Recreatief
- 
- 4.1.4 ***If 'Wat is het meest bij u van toepassing ten aanzien van uw acitviteit?' is equal to 'Handbal' answer this question:***  
Handbal
- Professioneel
- Competitief
- Recreatief
- 
- 4.1.5 ***If 'Wat is het meest bij u van toepassing ten aanzien van uw acitviteit?' is equal to 'Rugby' answer this question:***  
Rugby
- Professioneel
- Competitief
- Recreatief

|    |        |                                                                                                                                                                                          |                                     |
|----|--------|------------------------------------------------------------------------------------------------------------------------------------------------------------------------------------------|-------------------------------------|
| 1  |        |                                                                                                                                                                                          |                                     |
| 2  | 4.1.6  | <b>If 'Wat is het meest bij u van toepassing ten aanzien van uw acitiviteit?' is equal to 'Voetbal' answer this question:</b>                                                            | <input type="radio"/> Professioneel |
| 3  |        |                                                                                                                                                                                          | <input type="radio"/> Competitief   |
| 4  |        |                                                                                                                                                                                          | <input type="radio"/> Recreatief    |
| 5  |        | Voetbal                                                                                                                                                                                  |                                     |
| 6  |        |                                                                                                                                                                                          |                                     |
| 7  |        |                                                                                                                                                                                          |                                     |
| 8  | 4.1.7  | <b>If 'Wat is het meest bij u van toepassing ten aanzien van uw acitiviteit?' is equal to 'Hockey' answer this question:</b>                                                             | <input type="radio"/> Professioneel |
| 9  |        |                                                                                                                                                                                          | <input type="radio"/> Competitief   |
| 10 |        |                                                                                                                                                                                          | <input type="radio"/> Recreatief    |
| 11 |        | Hockey                                                                                                                                                                                   |                                     |
| 12 |        |                                                                                                                                                                                          |                                     |
| 13 |        |                                                                                                                                                                                          |                                     |
| 14 | 4.1.8  | <b>If 'Wat is het meest bij u van toepassing ten aanzien van uw acitiviteit?' is equal to 'Korfbal' answer this question:</b>                                                            | <input type="radio"/> Professioneel |
| 15 |        |                                                                                                                                                                                          | <input type="radio"/> Competitief   |
| 16 |        |                                                                                                                                                                                          | <input type="radio"/> Recreatief    |
| 17 |        | Korfbal                                                                                                                                                                                  |                                     |
| 18 |        |                                                                                                                                                                                          |                                     |
| 19 |        |                                                                                                                                                                                          |                                     |
| 20 | 4.1.9  | <b>If 'Wat is het meest bij u van toepassing ten aanzien van uw acitiviteit?' is equal to 'Gevechtssporten: judo, karate, kung fu, taekwando, jiu jitsu, etc.' answer this question:</b> | <input type="radio"/> Professioneel |
| 21 |        |                                                                                                                                                                                          | <input type="radio"/> Competitief   |
| 22 |        |                                                                                                                                                                                          | <input type="radio"/> Recreatief    |
| 23 |        | Gevechtssporten: judo, karate, kung fu, taekwando, jiu                                                                                                                                   |                                     |
| 24 |        | jitsu, etc.                                                                                                                                                                              |                                     |
| 25 |        |                                                                                                                                                                                          |                                     |
| 26 |        |                                                                                                                                                                                          |                                     |
| 27 | 4.1.10 | <b>If 'Wat is het meest bij u van toepassing ten aanzien van uw acitiviteit?' is equal to 'Oriëntatielopen' answer this question:</b>                                                    | <input type="radio"/> Professioneel |
| 28 |        |                                                                                                                                                                                          | <input type="radio"/> Competitief   |
| 29 |        |                                                                                                                                                                                          | <input type="radio"/> Recreatief    |
| 30 |        | Oriëntatielopen                                                                                                                                                                          |                                     |
| 31 |        |                                                                                                                                                                                          |                                     |
| 32 |        |                                                                                                                                                                                          |                                     |
| 33 | 4.1.11 | <b>If 'Wat is het meest bij u van toepassing ten aanzien van uw acitiviteit?' is equal to 'Rhythmische gymnastiek' answer this question:</b>                                             | <input type="radio"/> Professioneel |
| 34 |        |                                                                                                                                                                                          | <input type="radio"/> Competitief   |
| 35 |        |                                                                                                                                                                                          | <input type="radio"/> Recreatief    |
| 36 |        | Rhythmisch gymnastiek                                                                                                                                                                    |                                     |
| 37 |        |                                                                                                                                                                                          |                                     |
| 38 |        |                                                                                                                                                                                          |                                     |
| 39 | 4.1.12 | <b>If 'Wat is het meest bij u van toepassing ten aanzien van uw acitiviteit?' is equal to 'Volleybal' answer this question:</b>                                                          | <input type="radio"/> Professioneel |
| 40 |        |                                                                                                                                                                                          | <input type="radio"/> Competitief   |
| 41 |        |                                                                                                                                                                                          | <input type="radio"/> Recreatief    |
| 42 |        | Volleybal                                                                                                                                                                                |                                     |
| 43 |        |                                                                                                                                                                                          |                                     |
| 44 | 4.1.13 | <b>If 'Wat is het meest bij u van toepassing ten aanzien van uw acitiviteit?' is equal to 'Boxen' answer this question:</b>                                                              | <input type="radio"/> Professioneel |
| 45 |        |                                                                                                                                                                                          | <input type="radio"/> Competitief   |
| 46 |        |                                                                                                                                                                                          | <input type="radio"/> Recreatief    |
| 47 |        | Boxen                                                                                                                                                                                    |                                     |
| 48 |        |                                                                                                                                                                                          |                                     |
| 49 |        |                                                                                                                                                                                          |                                     |
| 50 | 4.1.14 | <b>If 'Wat is het meest bij u van toepassing ten aanzien van uw acitiviteit?' is equal to 'Freestyle snowboarden' answer this question:</b>                                              | <input type="radio"/> Professioneel |
| 51 |        |                                                                                                                                                                                          | <input type="radio"/> Competitief   |
| 52 |        |                                                                                                                                                                                          | <input type="radio"/> Recreatief    |
| 53 |        | Freestyle snowboarden                                                                                                                                                                    |                                     |
| 54 |        |                                                                                                                                                                                          |                                     |
| 55 |        |                                                                                                                                                                                          |                                     |
| 56 | 4.1.15 | <b>If 'Wat is het meest bij u van toepassing ten aanzien van uw acitiviteit?' is equal to 'Freestyle snowboarden' answer this question:</b>                                              | <input type="radio"/> Professioneel |
| 57 |        |                                                                                                                                                                                          | <input type="radio"/> Competitief   |
| 58 |        |                                                                                                                                                                                          | <input type="radio"/> Recreatief    |
| 59 |        | IJshockey                                                                                                                                                                                |                                     |
| 60 |        |                                                                                                                                                                                          |                                     |

- 1  
2  
3  
4  
5  
6  
7
- 4.1.16 ***If 'Wat is het meest bij u van toepassing ten aanzien van uw acitiviteit?' is equal to 'Tennis' answer this question:***  
Tennis  Professioneel  
 Competitief  
 Recreatief
- 8  
9  
10  
11  
12
- 4.1.17 ***If 'Wat is het meest bij u van toepassing ten aanzien van uw acitiviteit?' is equal to 'Worstelen' answer this question:***  
Worstelen  Professioneel  
 Competitief  
 Recreatief
- 13  
14  
15  
16  
17  
18
- 4.1.18 ***If 'Wat is het meest bij u van toepassing ten aanzien van uw acitiviteit?' is equal to 'Fitness, aerobics' answer this question:***  
Fitness, aerobics  Professioneel  
 Competitief  
 Recreatief
- 19  
20  
21  
22  
23  
24
- 4.1.19 ***If 'Wat is het meest bij u van toepassing ten aanzien van uw acitiviteit?' is equal to 'Badminton' answer this question:***  
Badminton  Professioneel  
 Competitief  
 Recreatief
- 25  
26  
27  
28  
29  
30
- 4.1.20 ***If 'Wat is het meest bij u van toepassing ten aanzien van uw acitiviteit?' is equal to 'Baseball' answer this question:***  
Baseball  Professioneel  
 Competitief  
 Recreatief
- 31  
32  
33  
34  
35
- 4.1.21 ***If 'Wat is het meest bij u van toepassing ten aanzien van uw acitiviteit?' is equal to 'Cross-country hardlopen' answer this question:***  
Cross-country hardlopen  Professioneel  
 Competitief  
 Recreatief
- 36  
37  
38  
39  
40  
41
- 4.1.22 ***If 'Wat is het meest bij u van toepassing ten aanzien van uw acitiviteit?' is equal to 'Moderne pentathlon' answer this question:***  
Moderne pentathlon  Professioneel  
 Competitief  
 Recreatief
- 42  
43  
44  
45  
46  
47
- 4.1.23 ***If 'Wat is het meest bij u van toepassing ten aanzien van uw acitiviteit?' is equal to 'Squash' answer this question:***  
Squash  Professioneel  
 Competitief  
 Recreatief
- 48  
49  
50  
51  
52  
53
- 4.1.24 ***If 'Wat is het meest bij u van toepassing ten aanzien van uw acitiviteit?' is equal to 'Surfen, windsurfen' answer this question:***  
Surfen, windsurfen  Professioneel  
 Competitief  
 Recreatief
- 54  
55  
56  
57  
58  
59  
60
- 4.1.25 ***If 'Wat is het meest bij u van toepassing ten aanzien van uw acitiviteit?' is equal to 'Tafel tennis' answer this question:***  
Tafel tennis  Professioneel  
 Competitief  
 Recreatief

- 1  
2  
3  
4  
5  
6  
7
- 
- 4.1.26 **If 'Wat is het meest bij u van toepassing ten aanzien van uw acitiviteit?' is equal to 'Atletiek: spring-, werponderdelen' answer this question:**  
Atletiek: spring-, werponderdelen
- Professioneel  
 Competitief  
 Recreatief
- 
- 8  
9  
10  
11  
12
- 4.1.27 **If 'Wat is het meest bij u van toepassing ten aanzien van uw acitiviteit?' is equal to 'Waterskieën' answer this question:**  
Waterskien
- Professioneel  
 Competitief  
 Recreatief
- 
- 13  
14  
15  
16  
17  
18
- 4.1.28 **If 'Wat is het meest bij u van toepassing ten aanzien van uw acitiviteit?' is equal to 'Dans' answer this question:**  
Dans
- Professioneel  
 Competitief  
 Recreatief
- 
- 19  
20  
21  
22  
23  
24
- 4.1.29 **If 'Wat is het meest bij u van toepassing ten aanzien van uw acitiviteit?' is equal to 'Schermen' answer this question:**  
Schermen
- Professioneel  
 Competitief  
 Recreatief
- 
- 25  
26  
27  
28  
29  
30
- 4.1.30 **If 'Wat is het meest bij u van toepassing ten aanzien van uw acitiviteit?' is equal to 'Zaalhockey' answer this question:**  
Zaalhockey
- Professioneel  
 Competitief  
 Recreatief
- 
- 31  
32  
33  
34  
35
- 4.1.31 **If 'Wat is het meest bij u van toepassing ten aanzien van uw acitiviteit?' is equal to 'Bergbeklimmen' answer this question:**  
Bergbeklimmen
- Professioneel  
 Competitief  
 Recreatief
- 
- 36  
37  
38  
39  
40  
41
- 4.1.32 **If 'Wat is het meest bij u van toepassing ten aanzien van uw acitiviteit?' is equal to 'Langlauf' answer this question:**  
Langlauf
- Professioneel  
 Competitief  
 Recreatief
- 
- 42  
43  
44  
45  
46  
47
- 4.1.33 **If 'Wat is het meest bij u van toepassing ten aanzien van uw acitiviteit?' is equal to 'Parachute springen' answer this question:**  
Parachute springen
- Professioneel  
 Competitief  
 Recreatief
- 
- 48  
49  
50  
51  
52  
53  
54  
55  
56  
57  
58  
59  
60
- 4.1.34 **If 'Wat is het meest bij u van toepassing ten aanzien van uw acitiviteit?' is equal to 'Softball' answer this question:**  
Softball
- Professioneel  
 Competitief  
 Recreatief



- 1  
2  
3  
4  
5  
6  
7  
8  
9  
10  
11  
12
- 4.1.35 ***If 'Wat is het meest bij u van toepassing ten aanzien van uw acitiviteit?' is equal to 'Speciale beroepen en werkactiviteiten; speciale beroepen: ballet, professioneel soldaat, speciale reddingswerker, stuntman, etc.' answer this question:***  
Speciale beroepen en werkactiviteiten speciale beroepen: ballet, professioneel soldaat, speciale reddingswerker, stuntman, etc.
- ballet, professioneel soldaat, speciale reddingswerker, stuntman, etc.
- 
- 13  
14  
15  
16  
17
- 4.1.36 ***If 'Wat is het meest bij u van toepassing ten aanzien van uw acitiviteit?' is equal to 'Duiken' answer this question:***  
Duiken
- Professioneel/competitief  
 Recreatief
- 
- 18  
19  
20  
21  
22
- 4.1.37 ***If 'Wat is het meest bij u van toepassing ten aanzien van uw acitiviteit?' is equal to 'Scubaduiken' answer this question:***  
Scubaduiken
- Professioneel/competitief  
 Recreatief
- 
- 23  
24  
25  
26  
27  
28
- 4.1.38 ***If 'Wat is het meest bij u van toepassing ten aanzien van uw acitiviteit?' is equal to 'Skaten, in-line skaten' answer this question:***  
skaten, in-linen skaten
- Professioneel/competitief  
 Recreatief
- 
- 29  
30  
31  
32  
33
- 4.1.39 ***If 'Wat is het meest bij u van toepassing ten aanzien van uw acitiviteit?' is equal to 'Atletiek: looponderdelen' answer this question:***  
Atletiek: looponderdelen
- Professioneel/competitief  
 Recreatief
- 
- 34  
35  
36  
37  
38
- 4.1.40 ***If 'Wat is het meest bij u van toepassing ten aanzien van uw acitiviteit?' is equal to 'Triatlon' answer this question:***  
triatlon
- Professioneel/competitief  
 Recreatief
- 
- 39  
40  
41  
42  
43  
44  
45
- 4.1.41 ***If 'Wat is het meest bij u van toepassing ten aanzien van uw acitiviteit?' is equal to 'Gewichtsheffen, body-building' answer this question:***  
Gewichtsheffen, body-building
- Professioneel/competitief  
 Recreatief
- 
- 46  
47  
48  
49  
50  
51  
52
- 4.1.42 ***If 'Wat is het meest bij u van toepassing ten aanzien van uw acitiviteit?' is equal to 'Alle competitieve sporten hieronder met 'seasonal' conditioning' answer this question:***  
Alle competitieve sporten hieronder met 'seasonal' conditioning
- Alle competitieve sporten hieronder met 'seasonal' conditioning
- 
- 53  
54  
55  
56  
57  
58  
59  
60
- 4.1.43 ***If 'Wat is het meest bij u van toepassing ten aanzien van uw acitiviteit?' is equal to 'Zwaar fysiek werk' answer this question:***  
Zwaar fysiek werk
- Alle competitieve sporten hieronder met 'seasonal' conditioning

- 1  
2  
3  
4  
5  
6  
7  
8  
9  
10  
11  
12  
13  
14  
15  
16  
17  
18  
19  
20  
21  
22  
23  
24  
25  
26  
27  
28  
29  
30  
31  
32  
33  
34  
35  
36  
37  
38  
39  
40  
41  
42  
43  
44  
45  
46  
47  
48  
49  
50  
51  
52  
53  
54  
55  
56  
57  
58  
59  
60
- 
- 4.1.44 ***If 'Wat is het meest bij u van toepassing ten aanzien van uw acitiviteit?' is equal to 'Alpine skiën en snowboarden' answer this question:***  
Alpine skien en snowboarden  Alpine skien en snowboarden
- 
- 4.1.45 ***If 'Wat is het meest bij u van toepassing ten aanzien van uw acitiviteit?' is equal to 'Bowlen/curlen' answer this question:***  
Bowlen/curlen  Bowlen/curlen
- 
- 4.1.46 ***If 'Wat is het meest bij u van toepassing ten aanzien van uw acitiviteit?' is equal to 'Golf' answer this question:***  
Golf  Golf
- 
- 4.1.47 ***If 'Wat is het meest bij u van toepassing ten aanzien van uw acitiviteit?' is equal to 'Mountainbike/BMX' answer this question:***  
Mountainbike/BMX  Mountainbike/BMX
- 
- 4.1.48 ***If 'Wat is het meest bij u van toepassing ten aanzien van uw acitiviteit?' is equal to 'Powerliften' answer this question:***  
Powerliften  Powerliften
- 
- 4.1.49 ***If 'Wat is het meest bij u van toepassing ten aanzien van uw acitiviteit?' is equal to 'Zeilen' answer this question:***  
Zeilen  Zeilen
- 
- 4.1.50 ***If 'Wat is het meest bij u van toepassing ten aanzien van uw acitiviteit?' is equal to 'Fysiek werk' answer this question:***  
Fysiek werk  Fysiek werk
- 
- 4.1.51 ***If 'Wat is het meest bij u van toepassing ten aanzien van uw acitiviteit?' is equal to 'Wielrennen' answer this question:***  
Wielrennen  Wielrennen
- 
- 4.1.52 ***If 'Wat is het meest bij u van toepassing ten aanzien van uw acitiviteit?' is equal to 'Paardrijden' answer this question:***  
Paardrijden  Paardrijden
- 
- 4.1.53 ***If 'Wat is het meest bij u van toepassing ten aanzien van uw acitiviteit?' is equal to 'Motorsporten/technische sporten' answer this question:***  
Motorsporten/technische sporten  Motorsporten/technische sporten
- 
- 4.1.54 ***If 'Wat is het meest bij u van toepassing ten aanzien van uw acitiviteit?' is equal to 'Roeien, kayakken' answer this question:***  
Roeien, kayakken  Roeien, kayakken

|        |                                                                                                                                                                                                                                                                                    |                                                                                                    |
|--------|------------------------------------------------------------------------------------------------------------------------------------------------------------------------------------------------------------------------------------------------------------------------------------|----------------------------------------------------------------------------------------------------|
| 4.1.55 | <b>If 'Wat is het meest bij u van toepassing ten aanzien van uw acitiviteit?' is equal to 'Boogschieten' answer this question:</b><br>Boogschieten                                                                                                                                 | <input type="radio"/> Boogschieten                                                                 |
| 4.1.56 | <b>If 'Wat is het meest bij u van toepassing ten aanzien van uw acitiviteit?' is equal to 'Water polo en zwemmen' answer this question:</b><br>Water polo en zwemmen                                                                                                               | <input type="radio"/> Water polo en zwemmen                                                        |
| 4.1.57 | <b>If 'Wat is het meest bij u van toepassing ten aanzien van uw acitiviteit?' is equal to 'Kunnen lopen op oneven grond' answer this question:</b><br>Kunnen lopen op oneven grond                                                                                                 | <input type="radio"/> Kunnen lopen op oneven grond                                                 |
| 4.1.58 | <b>If 'Wat is het meest bij u van toepassing ten aanzien van uw acitiviteit?' is equal to 'Geen sport, echter geen limitatie in dagelijkse activiteiten' answer this question:</b><br>Geen sport, echter geen limitatie in dagelijkse activiteiten                                 | <input type="radio"/> Geen sport, echter geen limitatie in dagelijkse activiteiten                 |
| 4.1.59 | <b>If 'Wat is het meest bij u van toepassing ten aanzien van uw acitiviteit?' is equal to 'Kunnen lopen op even grond, maar de dagelijkse activiteiten zijn gelimiteerd' answer this question:</b><br>Kunnen lopen op even grond, maar de dagelijkse activiteiten zijn gelimiteerd | <input type="radio"/> Kunnen lopen op even grond, maar de dagelijkse activiteiten zijn gelimiteerd |
| 4.1.60 | <b>If 'Wat is het meest bij u van toepassing ten aanzien van uw acitiviteit?' is equal to 'Niet kunnen lopen, fysieke handicap wegens enkelproblemen' answer this question:</b><br>Niet kunnen lopen, fysieke handicap wegens enkelproblemen                                       | <input type="radio"/> Niet kunnen lopen, fysieke handicap wegens enkelproblemen                    |

## Vragenlijst PRIMA studie 5 jaar - Hoe tevreden bent u over de enkelklachten?

| Number | Question                                   | Answers                                                                                                                       |
|--------|--------------------------------------------|-------------------------------------------------------------------------------------------------------------------------------|
| 5.1    | Hoe tevreden bent u over de enkelklachten? | <input type="radio"/> Slecht<br><input type="radio"/> Matig<br><input type="radio"/> Goed<br><input type="radio"/> Uitstekend |

## Vragenlijst PRIMA studie 5 jaar - SF-36

| Number | Question                                                                                                                                                                                                                                                                                                                                                           | Answers                                                                                                                                                                                                                                                                                                                                                                 |
|--------|--------------------------------------------------------------------------------------------------------------------------------------------------------------------------------------------------------------------------------------------------------------------------------------------------------------------------------------------------------------------|-------------------------------------------------------------------------------------------------------------------------------------------------------------------------------------------------------------------------------------------------------------------------------------------------------------------------------------------------------------------------|
|        | Deze vragenlijst gaat over uw standpunten t.a.v. uw gezondheid. Met behulp van deze gegevens kan worden bijgehouden hoe u zich voelt en hoe goed u in staat bent uw gebruikelijke bezigheden uit te voeren. Beantwoord elke vraag door een antwoord aan te klikken. Als u niet zeker weet hoe u een vraag moet beantwoorden, geef dan het best mogelijke antwoord. |                                                                                                                                                                                                                                                                                                                                                                         |
| 6.1    | Hoe zou u over het algemeen uw gezondheid noemen?                                                                                                                                                                                                                                                                                                                  | <input type="radio"/> Uitstekend <input type="radio"/> Zeer goed <input type="radio"/><br><input type="radio"/> Goed <input type="radio"/> Matig <input type="radio"/> Slecht                                                                                                                                                                                           |
| 6.2    | Hoe beoordeelt u nu uw gezondheid over het algemeen vergeleken met een jaar geleden?                                                                                                                                                                                                                                                                               | <input type="radio"/> Veel beter dan een jaar geleden <input type="radio"/><br><input type="radio"/> Wat beter dan een jaar geleden <input type="radio"/><br><input type="radio"/> Ongeveer hetzelfde als een jaar geleden<br><input type="radio"/> Wat slechter dan een jaar geleden <input type="radio"/><br><input type="radio"/> Veel slechter dan een jaar geleden |
| 6.3    | Wordt u door uw gezondheid op dit moment beperkt bij forse inspanning, zoals hardlopen, tillen van zware voorwerpen of een veeleisende sport beoefenen?                                                                                                                                                                                                            | <input type="radio"/> Ja, ernstig beperkt <input type="radio"/> Ja, een beetje<br>beperkt <input type="radio"/> Nee, helemaal niet beperkt                                                                                                                                                                                                                              |
| 6.4    | Wordt u door uw gezondheid op dit moment beperkt bij matige inspanning zoals een tafel verplaatsen, stofzuigen, zwemmen of fietsen?                                                                                                                                                                                                                                | <input type="radio"/> Ja, ernstig beperkt <input type="radio"/> Ja, een beetje<br>beperkt <input type="radio"/> Nee, helemaal niet beperkt                                                                                                                                                                                                                              |
| 6.5    | Wordt u door uw gezondheid op dit moment beperkt bij boodschappen tillen of dragen?                                                                                                                                                                                                                                                                                | <input type="radio"/> Ja, ernstig beperkt <input type="radio"/> Ja, een beetje<br>beperkt <input type="radio"/> Nee, helemaal niet beperkt                                                                                                                                                                                                                              |
| 6.6    | Wordt u door uw gezondheid op dit moment beperkt bij een paar trappen oplopen?                                                                                                                                                                                                                                                                                     | <input type="radio"/> Ja, ernstig beperkt <input type="radio"/> Ja, een beetje<br>beperkt <input type="radio"/> Nee, helemaal niet beperkt                                                                                                                                                                                                                              |
| 6.7    | Wordt u door uw gezondheid op dit moment beperkt bij één trap oplopen?                                                                                                                                                                                                                                                                                             | <input type="radio"/> Ja, ernstig beperkt <input type="radio"/> Ja, een beetje<br>beperkt <input type="radio"/> Nee, helemaal niet beperkt                                                                                                                                                                                                                              |
| 6.8    | Wordt u door uw gezondheid op dit moment beperkt bij bukken, knielen of hurken?                                                                                                                                                                                                                                                                                    | <input type="radio"/> Ja, ernstig beperkt <input type="radio"/> Ja, een beetje<br>beperkt <input type="radio"/> Nee, helemaal niet beperkt                                                                                                                                                                                                                              |
| 6.9    | Wordt u door uw gezondheid op dit moment beperkt bij meer dan één kilometer lopen?                                                                                                                                                                                                                                                                                 | <input type="radio"/> Ja, ernstig beperkt <input type="radio"/> Ja, een beetje<br>beperkt <input type="radio"/> Nee, helemaal niet beperkt                                                                                                                                                                                                                              |
| 6.10   | Wordt u door uw gezondheid op dit moment beperkt bij een paar honderd meter lopen?                                                                                                                                                                                                                                                                                 | <input type="radio"/> Ja, ernstig beperkt <input type="radio"/> Ja, een beetje<br>beperkt <input type="radio"/> Nee, helemaal niet beperkt                                                                                                                                                                                                                              |

1  
2  
3  
4  
5  
6  
7  
8  
9  
10  
11  
12  
13  
14  
15  
16  
17  
18  
19  
20  
21  
22  
23  
24  
25  
26  
27  
28  
29  
30  
31  
32  
33  
34  
35  
36  
37  
38  
39  
40  
41  
42  
43  
44  
45  
46  
47  
48  
49  
50  
51  
52  
53  
54  
55  
56  
57  
58  
59  
60

|      |                                                                                                                                                                                                              |                                           |                                              |                                                  |                             |                                     |                                    |
|------|--------------------------------------------------------------------------------------------------------------------------------------------------------------------------------------------------------------|-------------------------------------------|----------------------------------------------|--------------------------------------------------|-----------------------------|-------------------------------------|------------------------------------|
| 6.11 | Wordt u door uw gezondheid op dit moment beperkt bij ongeveer honderd meter lopen?                                                                                                                           | <input type="radio"/> Ja, ernstig beperkt | <input type="radio"/> Ja, een beetje beperkt | <input type="radio"/> Nee, helemaal niet beperkt |                             |                                     |                                    |
| 6.12 | Wordt u door uw gezondheid op dit moment beperkt bij uzelf wassen of aankleden?                                                                                                                              | <input type="radio"/> Ja, ernstig beperkt | <input type="radio"/> Ja, een beetje beperkt | <input type="radio"/> Nee, helemaal niet beperkt |                             |                                     |                                    |
| 6.13 | U besteedde in de afgelopen 4 weken minder tijd aan werk of andere bezigheden                                                                                                                                | <input type="radio"/> Ja                  | <input type="radio"/> Nee                    |                                                  |                             |                                     |                                    |
| 6.14 | U heeft in de afgelopen 4 weken minder bereikt dan u zou willen                                                                                                                                              | <input type="radio"/> Ja                  | <input type="radio"/> Nee                    |                                                  |                             |                                     |                                    |
| 6.15 | U was in de afgelopen 4 weken beperkt in het soort werk of andere bezigheden.                                                                                                                                | <input type="radio"/> Ja                  | <input type="radio"/> Nee                    |                                                  |                             |                                     |                                    |
| 6.16 | U had de afgelopen 4 weken moeite om uw werk of andere bezigheden uit te voeren (het kostte u bijvoorbeeld extra inspanning).                                                                                | <input type="radio"/> Ja                  | <input type="radio"/> Nee                    |                                                  |                             |                                     |                                    |
| 6.17 | U besteedde in de afgelopen 4 weken minder tijd aan werk of andere bezigheden ten gevolge van emotionele problemen                                                                                           | <input type="radio"/> Ja                  | <input type="radio"/> Nee                    |                                                  |                             |                                     |                                    |
| 6.18 | U heeft in de afgelopen 4 weken minder bereikt dan u zou willen ten gevolge van emotionele problemen.                                                                                                        | <input type="radio"/> Ja                  | <input type="radio"/> Nee                    |                                                  |                             |                                     |                                    |
| 6.19 | U deed de afgelopen 4 weken uw werk of andere bezigheden niet zo zorgvuldig als gewoonlijk ten gevolge van emotionele problemen.                                                                             | <input type="radio"/> Ja                  | <input type="radio"/> Nee                    |                                                  |                             |                                     |                                    |
| 6.20 | In hoeverre hebben uw lichamelijke gezondheid of emotionele problemen u gedurende de afgelopen 4 weken gehinderd in uw normale omgang met familie, vrienden of burens, of bij activiteiten in groepsverband? | <input type="radio"/> Helemaal niet       | <input type="radio"/> Enigszins              | <input type="radio"/> Nogal                      | <input type="radio"/> Veel  | <input type="radio"/> Heel erg veel |                                    |
| 6.21 | Hoeveel lichamelijke pijn heeft u de afgelopen 4 weken gehad?                                                                                                                                                | <input type="radio"/> Geen                | <input type="radio"/> Heel licht             | <input type="radio"/> Licht                      | <input type="radio"/> Nogal | <input type="radio"/> Ernstig       | <input type="radio"/> Heel ernstig |
| 6.22 | In welke mate bent u de afgelopen 4 weken door de pijn gehinderd in uw normale werk (zowel werk buitenshuis als huishoudelijk werk)?                                                                         | <input type="radio"/> Helemaal niet       | <input type="radio"/> Een klein beetje       | <input type="radio"/> Nogal                      | <input type="radio"/> Veel  | <input type="radio"/> Heel erg veel |                                    |

1  
2 6.23 Voelde u zich levenslustig?  Altijd  
3  Meestal  
4  Vaak  
5  Soms  
6  Zelden  
7  Nooit  
8  
9  
10

---

11 6.24 Was u erg zenuwachtig?  Altijd  
12  Meestal  
13  Vaak  
14  Soms  
15  Zelden  
16  Nooit  
17  
18  
19  
20

---

21 6.25 Zat u zo in de put dat u niets kon?  Altijd  
22  Meestal  
23  Vaak  
24  Soms  
25  Zelden  
26  Nooit  
27  
28  
29  
30

---

31 6.26 Voelde u zich rustig en tevreden?  Altijd  
32  Meestal  
33  Vaak  
34  Soms  
35  Zelden  
36  Nooit  
37  
38  
39  
40

---

41 6.27 Had u veel energie?  Altijd  
42  Meestal  
43  Vaak  
44  Soms  
45  Zelden  
46  Nooit  
47  
48  
49  
50

---

51 6.28 Voelde u zich somber en neerslachtig?  Altijd  
52  Meestal  
53  Vaak  
54  Soms  
55  Zelden  
56  Nooit  
57  
58  
59  
60

1  
2  
3  
4  
5  
6  
7  
8  
9  
10  
11  
12  
13  
14  
15  
16  
17  
18  
19  
20  
21  
22  
23  
24  
25  
26  
27  
28  
29  
30  
31  
32  
33  
34  
35  
36  
37  
38  
39  
40  
41  
42  
43  
44  
45  
46  
47  
48  
49  
50  
51  
52  
53  
54  
55  
56  
57  
58  
59  
60

---

|      |                         |                                                                                                                                                                                          |
|------|-------------------------|------------------------------------------------------------------------------------------------------------------------------------------------------------------------------------------|
| 6.29 | Voelde u zich uitgeput? | <input type="radio"/> Altijd<br><input type="radio"/> Meestal<br><input type="radio"/> Vaak<br><input type="radio"/> Soms<br><input type="radio"/> Zelden<br><input type="radio"/> Nooit |
|------|-------------------------|------------------------------------------------------------------------------------------------------------------------------------------------------------------------------------------|

---

|      |                          |                                                                                                                                                                                          |
|------|--------------------------|------------------------------------------------------------------------------------------------------------------------------------------------------------------------------------------|
| 6.30 | Was u een gelukkig mens? | <input type="radio"/> Altijd<br><input type="radio"/> Meestal<br><input type="radio"/> Vaak<br><input type="radio"/> Soms<br><input type="radio"/> Zelden<br><input type="radio"/> Nooit |
|------|--------------------------|------------------------------------------------------------------------------------------------------------------------------------------------------------------------------------------|

---

|      |                    |                                                                                                                                                                                          |
|------|--------------------|------------------------------------------------------------------------------------------------------------------------------------------------------------------------------------------|
| 6.31 | Voelde u zich moe? | <input type="radio"/> Altijd<br><input type="radio"/> Meestal<br><input type="radio"/> Vaak<br><input type="radio"/> Soms<br><input type="radio"/> Zelden<br><input type="radio"/> Nooit |
|------|--------------------|------------------------------------------------------------------------------------------------------------------------------------------------------------------------------------------|

---

|      |                                                                                                                                                                                      |                                                                                                                                                            |
|------|--------------------------------------------------------------------------------------------------------------------------------------------------------------------------------------|------------------------------------------------------------------------------------------------------------------------------------------------------------|
| 6.32 | Hoe vaak hebben uw lichamelijke gezondheid of emotionele problemen u gedurende de afgelopen 4 weken gehinderd bij uw sociale activiteiten (zoals vrienden of familie bezoeken etc.)? | <input type="radio"/> Altijd<br><input type="radio"/> Meestal<br><input type="radio"/> Soms<br><input type="radio"/> Zelden<br><input type="radio"/> Nooit |
|------|--------------------------------------------------------------------------------------------------------------------------------------------------------------------------------------|------------------------------------------------------------------------------------------------------------------------------------------------------------|

---

|      |                                                            |                                                                                                                                                                                                              |
|------|------------------------------------------------------------|--------------------------------------------------------------------------------------------------------------------------------------------------------------------------------------------------------------|
| 6.33 | Ik lijk wat gemakkelijker ziek te worden dan andere mensen | <input type="radio"/> Volkomen juist<br><input type="radio"/> Grotendeels juist<br><input type="radio"/> Weet ik niet<br><input type="radio"/> Grotendeels onjuist<br><input type="radio"/> Volkomen onjuist |
|------|------------------------------------------------------------|--------------------------------------------------------------------------------------------------------------------------------------------------------------------------------------------------------------|

---

|      |                                                 |                                                                                                                                                                                                              |
|------|-------------------------------------------------|--------------------------------------------------------------------------------------------------------------------------------------------------------------------------------------------------------------|
| 6.34 | Ik ben even gezond als andere mensen die ik ken | <input type="radio"/> Volkomen juist<br><input type="radio"/> Grotendeels juist<br><input type="radio"/> Weet ik niet<br><input type="radio"/> Grotendeels onjuist<br><input type="radio"/> Volkomen onjuist |
|------|-------------------------------------------------|--------------------------------------------------------------------------------------------------------------------------------------------------------------------------------------------------------------|

- 1  
2  
3  
4  
5  
6  
7  
8  
9
- 
- 6.35 Ik verwacht dat mijn gezondheid achteruit zal gaan
- Volkomen juist
  - Grotendeels juist
  - Weet ik niet
  - Grotendeels onjuist
  - Volkomen onjuist
- 

- 10  
11  
12  
13  
14  
15  
16  
17  
18  
19  
20  
21  
22
- 6.36 Mijn gezondheid is uitstekend
- Volkomen juist
  - Grotendeels juist
  - Weet ik niet
  - Grotendeels onjuist
  - Volkomen onjuist

## Vragenlijst PRIMA studie 5 jaar - GAS

| Number | Question                                                                                                                                                                                  | Answers                                                                                                                                                                                                                                                                                                                                                              |
|--------|-------------------------------------------------------------------------------------------------------------------------------------------------------------------------------------------|----------------------------------------------------------------------------------------------------------------------------------------------------------------------------------------------------------------------------------------------------------------------------------------------------------------------------------------------------------------------|
|        | Tijdens de eerste afspraak werd een duidelijk doel met u afgesproken. Dit werd tevens per email naar u gestuurd. Hoe is de situatie nu ten aanzien van de destijds gestelde doelstelling? |                                                                                                                                                                                                                                                                                                                                                                      |
| 7.1    | Wat is nu de situatie ten aanzien van het tijdens de eerste afspraak afgesproken doelstelling (Goal attainment Scaling)?                                                                  | <ul style="list-style-type: none"> <li><input type="radio"/> Achteruitgang (minder dan de uitgangssituatie)</li> <li><input type="radio"/> Uitgangssituatie</li> <li><input type="radio"/> Minder dan het doel</li> <li><input type="radio"/> Doel</li> <li><input type="radio"/> Meer dan het doel</li> <li><input type="radio"/> Veel meer dan het doel</li> </ul> |

## Vragenlijst PRIMA studie 5 jaar - EQ-5D-3L

| Number | Question                                                                                                                                                                                                                                                                                                                                                           | Answers                                                                                                                                                                                                                  |
|--------|--------------------------------------------------------------------------------------------------------------------------------------------------------------------------------------------------------------------------------------------------------------------------------------------------------------------------------------------------------------------|--------------------------------------------------------------------------------------------------------------------------------------------------------------------------------------------------------------------------|
|        | Deze vragenlijst gaat over uw standpunten t.a.v. uw gezondheid. Met behulp van deze gegevens kan worden bijgehouden hoe u zich voelt en hoe goed u in staat bent uw gebruikelijke bezigheden uit te voeren. Beantwoord elke vraag door een antwoord aan te klikken. Als u niet zeker weet hoe u een vraag moet beantwoorden, geef dan het best mogelijke antwoord. |                                                                                                                                                                                                                          |
| 8.1    | Hoe is het met uw Mobiliteit gesteld?                                                                                                                                                                                                                                                                                                                              | <ul style="list-style-type: none"> <li><input type="radio"/> Ik heb geen problemen met lopen</li> <li><input type="radio"/> Ik heb enige problemen met lopen</li> <li><input type="radio"/> Ik ben bedlegerig</li> </ul> |



|                                                                                                                                                                                                                                            |                                                                                                                  |                                                                                                                                                                                                                                                             |
|--------------------------------------------------------------------------------------------------------------------------------------------------------------------------------------------------------------------------------------------|------------------------------------------------------------------------------------------------------------------|-------------------------------------------------------------------------------------------------------------------------------------------------------------------------------------------------------------------------------------------------------------|
| 8.2                                                                                                                                                                                                                                        | Hoe is het met uw Zelfzorg gesteld?                                                                              | <input type="radio"/> Ik heb geen problemen om mijzelf te wassen of aan te kleden<br><input type="radio"/> Ik heb enige problemen om mijzelf te wassen of aan te kleden<br><input type="radio"/> Ik ben niet in staat om mijzelf te wassen of aan te kleden |
| 8.3                                                                                                                                                                                                                                        | Hoe is het met de Dagelijkse activiteiten (werk, studie, huishouden, gezins- en vrijetijdsactiviteiten) gesteld? | <input type="radio"/> Ik heb geen problemen met mijn dagelijkse activiteiten<br><input type="radio"/> Ik heb enige problemen met mijn dagelijkse activiteiten<br><input type="radio"/> Ik ben niet in staat om mijn dagelijkse activiteiten uit te voeren   |
| 8.4                                                                                                                                                                                                                                        | Hoe is het met de Pijn/klachten gesteld?                                                                         | <input type="radio"/> Ik heb geen pijn of andere klachten<br><input type="radio"/> Ik heb matige pijn of andere klachten<br><input type="radio"/> Ik heb zeer ernstige pijn of andere klachten                                                              |
| 8.5                                                                                                                                                                                                                                        | Hoe is het met de Stemming gesteld?                                                                              | <input type="radio"/> Ik ben niet angstig of somber<br><input type="radio"/> Ik ben matig angstig of somber<br><input type="radio"/> Ik ben erg angstig of somber                                                                                           |
| <p>We willen weten hoe goed of slecht uw gezondheid VANDAAG is. Deze meetschaal loopt van 0 tot 100: 100 staat voor de BESTE gezondheid die u zich kunt voorstellen - 0 staat voor de SLECHTSTE gezondheid die u zich kunt voorstellen</p> |                                                                                                                  |                                                                                                                                                                                                                                                             |
| 8.6                                                                                                                                                                                                                                        | Uw Gezondheid vandaag                                                                                            | (0.00) (100.00)                                                                                                                                                                                                                                             |

## Vragenlijst PRIMA studie 5 jaar - AOS

| Number                                                                                                                                                                                                                                                                                                                                                                                                               | Question                                                   | Answers                                                                                            |
|----------------------------------------------------------------------------------------------------------------------------------------------------------------------------------------------------------------------------------------------------------------------------------------------------------------------------------------------------------------------------------------------------------------------|------------------------------------------------------------|----------------------------------------------------------------------------------------------------|
| <p>Instructies: De lijn naast elke vraag staat voor hoeveel PIJN u heeft in verschillende situaties. De linker kant (0) is "geen pijn" en de rechter kant (100) is "ergste pijn denkbaar". Geef voor de onderstaande situaties op de lijn aan hoeveel PIJN u in de afgelopen week in de enkel had. Als een of meerdere van deze situaties niet van toepassing waren, dan kiest u de "niet van toepassing" optie.</p> |                                                            |                                                                                                    |
| 9.1                                                                                                                                                                                                                                                                                                                                                                                                                  | Wat was de hoogte van de ergste pijn in de afgelopen week? | (0.00) (100.00)                                                                                    |
| 9.2                                                                                                                                                                                                                                                                                                                                                                                                                  | Heeft u pijn als u 's ochtends opstaat?                    | <input type="radio"/> Ja<br><input type="radio"/> Nee<br><input type="radio"/> Niet van toepassing |

|    |       |                                                                                                                     |                                           |
|----|-------|---------------------------------------------------------------------------------------------------------------------|-------------------------------------------|
| 1  |       |                                                                                                                     |                                           |
| 2  | 9.2.1 | <b><i>If 'Heeft u pijn als u 's ochtends opstaat?' is equal to 'Ja' answer this question:</i></b>                   | (0.00) (100.00)                           |
| 3  |       | Hoeveel pijn heeft u voordat u 's ochtends opstaat?                                                                 |                                           |
| 4  |       |                                                                                                                     |                                           |
| 5  |       |                                                                                                                     |                                           |
| 6  | 9.3   | Heeft u pijn wanneer u op blote voeten loopt?                                                                       | <input type="radio"/> Ja                  |
| 7  |       |                                                                                                                     | <input type="radio"/> Nee                 |
| 8  |       |                                                                                                                     | <input type="radio"/> Niet van toepassing |
| 9  |       |                                                                                                                     |                                           |
| 10 |       |                                                                                                                     |                                           |
| 11 |       |                                                                                                                     |                                           |
| 12 | 9.3.1 | <b><i>If 'Heeft u pijn wanneer u op blote voeten loopt?' is equal to 'Ja' answer this question:</i></b>             | (0.00) (100.00)                           |
| 13 |       | Hoeveel pijn heeft u als u op blote voeten loopt?                                                                   |                                           |
| 14 |       |                                                                                                                     |                                           |
| 15 |       |                                                                                                                     |                                           |
| 16 | 9.4   | Heeft u pijn wanneer u op blote voeten staat?                                                                       | <input type="radio"/> Ja                  |
| 17 |       |                                                                                                                     | <input type="radio"/> Nee                 |
| 18 |       |                                                                                                                     | <input type="radio"/> Niet van toepassing |
| 19 |       |                                                                                                                     |                                           |
| 20 |       |                                                                                                                     |                                           |
| 21 |       |                                                                                                                     |                                           |
| 22 | 9.4.1 | <b><i>If 'Heeft u pijn wanneer u op blote voeten staat?' is equal to 'Ja' answer this question:</i></b>             | (0.00) (100.00)                           |
| 23 |       | Hoeveel pijn heeft u als u op blote voeten staat?                                                                   |                                           |
| 24 |       |                                                                                                                     |                                           |
| 25 |       |                                                                                                                     |                                           |
| 26 | 9.5   | Heeft u pijn wanneer u met schoenen loopt?                                                                          | <input type="radio"/> Ja                  |
| 27 |       |                                                                                                                     | <input type="radio"/> Nee                 |
| 28 |       |                                                                                                                     | <input type="radio"/> Niet van toepassing |
| 29 |       |                                                                                                                     |                                           |
| 30 |       |                                                                                                                     |                                           |
| 31 |       |                                                                                                                     |                                           |
| 32 | 9.5.1 | <b><i>If 'Heeft u pijn wanneer u met schoenen loopt?' is equal to 'Ja' answer this question:</i></b>                | (0.00) (100.00)                           |
| 33 |       | Hoeveel pijn heeft u wanneer u met schoenen loopt?                                                                  |                                           |
| 34 |       |                                                                                                                     |                                           |
| 35 |       |                                                                                                                     |                                           |
| 36 | 9.6   | Heeft u pijn wanneer u met schoenen staat?                                                                          | <input type="radio"/> Ja                  |
| 37 |       |                                                                                                                     | <input type="radio"/> Nee                 |
| 38 |       |                                                                                                                     | <input type="radio"/> Niet van toepassing |
| 39 |       |                                                                                                                     |                                           |
| 40 |       |                                                                                                                     |                                           |
| 41 |       |                                                                                                                     |                                           |
| 42 | 9.6.1 | <b><i>If 'Heeft u pijn wanneer u met schoenen staat?' is equal to 'Ja' answer this question:</i></b>                | (0.00) (100.00)                           |
| 43 |       | Hoeveel pijn heeft u wanneer u met schoenen staat?                                                                  |                                           |
| 44 |       |                                                                                                                     |                                           |
| 45 |       |                                                                                                                     |                                           |
| 46 | 9.7   | Heeft u pijn wanneer u loopt met steunzolen of een brace?                                                           | <input type="radio"/> Ja                  |
| 47 |       |                                                                                                                     | <input type="radio"/> Nee                 |
| 48 |       |                                                                                                                     | <input type="radio"/> Niet van toepassing |
| 49 |       |                                                                                                                     |                                           |
| 50 |       |                                                                                                                     |                                           |
| 51 |       |                                                                                                                     |                                           |
| 52 | 9.7.1 | <b><i>If 'Heeft u pijn wanneer u loopt met steunzolen of een brace?' is equal to 'Ja' answer this question:</i></b> | (0.00) (100.00)                           |
| 53 |       | Hoeveel pijn heeft u wanneer u loopt met steunzolen of een brace?                                                   |                                           |
| 54 |       |                                                                                                                     |                                           |
| 55 |       |                                                                                                                     |                                           |
| 56 |       |                                                                                                                     |                                           |
| 57 |       |                                                                                                                     |                                           |
| 58 |       |                                                                                                                     |                                           |
| 59 |       |                                                                                                                     |                                           |
| 60 |       |                                                                                                                     |                                           |

|    |        |                                                                                                              |                                                                                                    |          |
|----|--------|--------------------------------------------------------------------------------------------------------------|----------------------------------------------------------------------------------------------------|----------|
| 1  |        |                                                                                                              |                                                                                                    |          |
| 2  | 9.8    | Heeft u pijn wanneer u staat met steunzolen of een brace?                                                    | <input type="radio"/> Ja<br><input type="radio"/> Nee<br><input type="radio"/> Niet van toepassing |          |
| 3  |        |                                                                                                              |                                                                                                    |          |
| 4  |        |                                                                                                              |                                                                                                    |          |
| 5  |        |                                                                                                              |                                                                                                    |          |
| 6  |        |                                                                                                              |                                                                                                    |          |
| 7  |        |                                                                                                              |                                                                                                    |          |
| 8  | 9.8.1  | <b>If 'Heeft u pijn wanneer u staat met steunzolen of een brace?' is equal to 'Ja' answer this question:</b> | (0.00)                                                                                             | (100.00) |
| 9  |        | Hoeveel pijn heeft u wanneer u staat met steunzolen of een brace?                                            |                                                                                                    |          |
| 10 |        |                                                                                                              |                                                                                                    |          |
| 11 |        |                                                                                                              |                                                                                                    |          |
| 12 |        |                                                                                                              |                                                                                                    |          |
| 13 | 9.9    | Heeft u pijn aan het einde van de dag?                                                                       | <input type="radio"/> Ja<br><input type="radio"/> Nee<br><input type="radio"/> Niet van toepassing |          |
| 14 |        |                                                                                                              |                                                                                                    |          |
| 15 |        |                                                                                                              |                                                                                                    |          |
| 16 |        |                                                                                                              |                                                                                                    |          |
| 17 |        |                                                                                                              |                                                                                                    |          |
| 18 |        |                                                                                                              |                                                                                                    |          |
| 19 | 9.9.1  | <b>If 'Heeft u pijn aan het einde van de dag?' is equal to 'Ja' answer this question:</b>                    | (0.00)                                                                                             | (100.00) |
| 20 |        | Hoeveel pijn heeft u aan het einde van de dag?                                                               |                                                                                                    |          |
| 21 |        |                                                                                                              |                                                                                                    |          |
| 22 |        |                                                                                                              |                                                                                                    |          |
| 23 |        | Instructies:De lijn naast elke vraag staat voor hoeveel MOEITE u heeft met verschillende activiteiten.       |                                                                                                    |          |
| 24 |        | De linker kant (0) is "Niet moeilijk" en de rechter kant (100) is "Te moeilijk, niet uitvoerbaar". Geef voor |                                                                                                    |          |
| 25 |        | de onderstaande activiteiten op de lijn aan hoeveel MOEITE u in de afgelopen week door                       |                                                                                                    |          |
| 26 |        | enkelklachten had met onderstaande activiteiten. Als een situatie niet van toepassing is, kies dan de        |                                                                                                    |          |
| 27 |        | optie "niet van toepassing".                                                                                 |                                                                                                    |          |
| 28 |        |                                                                                                              |                                                                                                    |          |
| 29 |        |                                                                                                              |                                                                                                    |          |
| 30 | 9.10   | Heeft u moeite met door het huis lopen?                                                                      | <input type="radio"/> Ja<br><input type="radio"/> Nee<br><input type="radio"/> Niet van toepassing |          |
| 31 |        |                                                                                                              |                                                                                                    |          |
| 32 |        |                                                                                                              |                                                                                                    |          |
| 33 |        |                                                                                                              |                                                                                                    |          |
| 34 |        |                                                                                                              |                                                                                                    |          |
| 35 | 9.10.1 | <b>If 'Heeft u moeite met door het huis lopen?' is equal to 'Ja' answer this question:</b>                   | (0.00)                                                                                             | (100.00) |
| 36 |        | Hoeveel moeite heeft u met door het huis lopen?                                                              |                                                                                                    |          |
| 37 |        |                                                                                                              |                                                                                                    |          |
| 38 |        |                                                                                                              |                                                                                                    |          |
| 39 |        |                                                                                                              |                                                                                                    |          |
| 40 | 9.11   | Heeft u moeite met buiten lopen op oneven ondergrond?                                                        | <input type="radio"/> Ja<br><input type="radio"/> Nee<br><input type="radio"/> Niet van toepassing |          |
| 41 |        |                                                                                                              |                                                                                                    |          |
| 42 |        |                                                                                                              |                                                                                                    |          |
| 43 |        |                                                                                                              |                                                                                                    |          |
| 44 |        |                                                                                                              |                                                                                                    |          |
| 45 | 9.11.1 | <b>If 'Heeft u moeite met buiten lopen op oneven ondergrond?' is equal to 'Ja' answer this question:</b>     | (0.00)                                                                                             | (100.00) |
| 46 |        | Hoeveel moeite heeft u met buiten lopen op oneven ondergrond?                                                |                                                                                                    |          |
| 47 |        |                                                                                                              |                                                                                                    |          |
| 48 |        |                                                                                                              |                                                                                                    |          |
| 49 |        |                                                                                                              |                                                                                                    |          |
| 50 |        |                                                                                                              |                                                                                                    |          |
| 51 | 9.12   | Heeft u moeite met een paar honderd meter lopen?                                                             | <input type="radio"/> Ja<br><input type="radio"/> Nee<br><input type="radio"/> Niet van toepassing |          |
| 52 |        |                                                                                                              |                                                                                                    |          |
| 53 |        |                                                                                                              |                                                                                                    |          |
| 54 |        |                                                                                                              |                                                                                                    |          |
| 55 |        |                                                                                                              |                                                                                                    |          |
| 56 | 9.12.1 | <b>If 'Heeft u moeite met een paar honderd meter lopen?' is equal to 'Ja' answer this question:</b>          | (0.00)                                                                                             | (100.00) |
| 57 |        | Hoeveel moeite heeft u met een paar honderd meter lopen?                                                     |                                                                                                    |          |
| 58 |        |                                                                                                              |                                                                                                    |          |
| 59 |        |                                                                                                              |                                                                                                    |          |
| 60 |        |                                                                                                              |                                                                                                    |          |

|    |        |                                                                                                             |                                           |          |
|----|--------|-------------------------------------------------------------------------------------------------------------|-------------------------------------------|----------|
| 1  |        |                                                                                                             |                                           |          |
| 2  | 9.13   | Heeft u moeite met een trap oplopen?                                                                        | <input type="radio"/> Ja                  |          |
| 3  |        |                                                                                                             | <input type="radio"/> Nee                 |          |
| 4  |        |                                                                                                             | <input type="radio"/> Niet van toepassing |          |
| 5  |        |                                                                                                             |                                           |          |
| 6  |        |                                                                                                             |                                           |          |
| 7  |        |                                                                                                             |                                           |          |
| 8  | 9.13.1 | <b>If 'Heeft u moeite met een trap oplopen?' is equal to 'Ja' answer this question:</b>                     | (0.00)                                    | (100.00) |
| 9  |        | Hoeveel moeite heeft u met een trap oplopen?                                                                |                                           |          |
| 10 |        |                                                                                                             |                                           |          |
| 11 |        |                                                                                                             |                                           |          |
| 12 | 9.14   | Heeft u moeite met een trap aflopen?                                                                        | <input type="radio"/> Ja                  |          |
| 13 |        |                                                                                                             | <input type="radio"/> Nee                 |          |
| 14 |        |                                                                                                             | <input type="radio"/> Niet van toepassing |          |
| 15 |        |                                                                                                             |                                           |          |
| 16 |        |                                                                                                             |                                           |          |
| 17 |        |                                                                                                             |                                           |          |
| 18 | 9.14.1 | <b>If 'Heeft u moeite met een trap aflopen?' is equal to 'Ja' answer this question:</b>                     | (0.00)                                    | (100.00) |
| 19 |        | Hoeveel moeite heeft u met een trap aflopen?                                                                |                                           |          |
| 20 |        |                                                                                                             |                                           |          |
| 21 |        |                                                                                                             |                                           |          |
| 22 | 9.15   | Heeft u moeite met op de tenen staan?                                                                       | <input type="radio"/> Ja                  |          |
| 23 |        |                                                                                                             | <input type="radio"/> Nee                 |          |
| 24 |        |                                                                                                             | <input type="radio"/> Niet van toepassing |          |
| 25 |        |                                                                                                             |                                           |          |
| 26 |        |                                                                                                             |                                           |          |
| 27 |        |                                                                                                             |                                           |          |
| 28 | 9.15.1 | <b>If 'Heeft u moeite met op de tenen staan?' is equal to 'Ja' answer this question:</b>                    | (0.00)                                    | (100.00) |
| 29 |        | Hoeveel moeite heeft u met op de tenen staan?                                                               |                                           |          |
| 30 |        |                                                                                                             |                                           |          |
| 31 |        |                                                                                                             |                                           |          |
| 32 | 9.16   | Heeft u moeite met opstaan uit de stoel?                                                                    | <input type="radio"/> Ja                  |          |
| 33 |        |                                                                                                             | <input type="radio"/> Nee                 |          |
| 34 |        |                                                                                                             | <input type="radio"/> Niet van toepassing |          |
| 35 |        |                                                                                                             |                                           |          |
| 36 |        |                                                                                                             |                                           |          |
| 37 |        |                                                                                                             |                                           |          |
| 38 | 9.16.1 | <b>If 'Heeft u moeite met opstaan uit de stoel?' is equal to 'Ja' answer this question:</b>                 | (0.00)                                    | (100.00) |
| 39 |        | Hoeveel moeite heeft u met opstaan uit de stoel?                                                            |                                           |          |
| 40 |        |                                                                                                             |                                           |          |
| 41 |        |                                                                                                             |                                           |          |
| 42 | 9.17   | Heeft u moeite met het op- of afstappen van stoepranden?                                                    | <input type="radio"/> Ja                  |          |
| 43 |        |                                                                                                             | <input type="radio"/> Nee                 |          |
| 44 |        |                                                                                                             | <input type="radio"/> Niet van toepassing |          |
| 45 |        |                                                                                                             |                                           |          |
| 46 |        |                                                                                                             |                                           |          |
| 47 |        |                                                                                                             |                                           |          |
| 48 | 9.17.1 | <b>If 'Heeft u moeite met het op- of afstappen van stoepranden?' is equal to 'Ja' answer this question:</b> | (0.00)                                    | (100.00) |
| 49 |        | Hoeveel moeite heeft u met het op- of afstappen van stoepranden?                                            |                                           |          |
| 50 |        |                                                                                                             |                                           |          |
| 51 |        |                                                                                                             |                                           |          |
| 52 |        |                                                                                                             |                                           |          |
| 53 |        |                                                                                                             |                                           |          |
| 54 | 9.18   | Heeft u moeite met snel lopen of rennen?                                                                    | <input type="radio"/> Ja                  |          |
| 55 |        |                                                                                                             | <input type="radio"/> Nee                 |          |
| 56 |        |                                                                                                             | <input type="radio"/> Niet van toepassing |          |
| 57 |        |                                                                                                             |                                           |          |
| 58 |        |                                                                                                             |                                           |          |
| 59 |        |                                                                                                             |                                           |          |
| 60 |        |                                                                                                             |                                           |          |

9.18.1 ***If 'Heeft u moeite met snel lopen of rennen?' is equal to 'Ja' answer this question:*** (0.00) (100.00)  
 Hoeveel moeite heeft u met snel lopen of rennen?

## Vragenlijst PRIMA studie 5 jaar - FAOS

| Number | Question                                                                                                                                                                                                                                                                                                                                                                                                                                                                                                                                                                            | Answers                                                                                                                                                    |
|--------|-------------------------------------------------------------------------------------------------------------------------------------------------------------------------------------------------------------------------------------------------------------------------------------------------------------------------------------------------------------------------------------------------------------------------------------------------------------------------------------------------------------------------------------------------------------------------------------|------------------------------------------------------------------------------------------------------------------------------------------------------------|
|        | Deze lijst vraagt naar uw mening over uw voet/enkel. Uw antwoorden geven ons een beeld van uw voet/enkel klachten en hoe u in staat bent om alledaagse activiteiten uit te voeren in uw huidige situatie. Beantwoorden van een vraag doet u door het aanklikken van een vakje met het volgens u meest juiste antwoord (één vakje per vraag). Als u niet zeker weet hoe u een vraag moet beantwoorden, geeft u dan het antwoord dat volgens u het meest op uw situatie van toepassing is. Deze vraag heeft betrekking op het voorkomen van voet/enkel klachten in de afgelopen week. |                                                                                                                                                            |
| 10.1   | Is uw voet/enkel gezwollen?                                                                                                                                                                                                                                                                                                                                                                                                                                                                                                                                                         | <input type="radio"/> Nooit <input type="radio"/> Zelden <input type="radio"/> Soms <input type="radio"/> Vaak <input type="radio"/> Altijd                |
| 10.2   | Voelt u gekraak of hoort u klikken of een ander vreemd geluid wanneer u de voet/enkel beweegt?                                                                                                                                                                                                                                                                                                                                                                                                                                                                                      | <input type="radio"/> Nooit <input type="radio"/> Zelden <input type="radio"/> Soms <input type="radio"/> Vaak <input type="radio"/> Altijd                |
| 10.3   | Hapert uw enkel of blokkeert uw enkel ('op slot' gaan zitten) wanneer u deze beweegt?                                                                                                                                                                                                                                                                                                                                                                                                                                                                                               | <input type="radio"/> Nooit <input type="radio"/> Zelden <input type="radio"/> Soms <input type="radio"/> Vaak <input type="radio"/> Altijd                |
| 10.4   | Kunt u de voet/enkel volledig strekken?                                                                                                                                                                                                                                                                                                                                                                                                                                                                                                                                             | <input type="radio"/> Altijd <input type="radio"/> Vaak <input type="radio"/> Soms <input type="radio"/> Zelden <input type="radio"/> Nooit                |
| 10.5   | Kunt u de voet volledig naar u toe buigen?                                                                                                                                                                                                                                                                                                                                                                                                                                                                                                                                          | <input type="radio"/> Altijd <input type="radio"/> Vaak <input type="radio"/> Soms <input type="radio"/> Zelden <input type="radio"/> Nooit                |
| 10.6   | In welke mate heeft u een stijf gevoel in de voet/enkel 's ochtends bij het wakker worden?                                                                                                                                                                                                                                                                                                                                                                                                                                                                                          | <input type="radio"/> Niet Ernstig <input type="radio"/> Mild <input type="radio"/> Matig <input type="radio"/> Zeer ernstig                               |
| 10.7   | In welke mate heeft u een stijf gevoel in de voet/enkel na zitten, liggen of rusten later op de dag?                                                                                                                                                                                                                                                                                                                                                                                                                                                                                | <input type="radio"/> Niet Ernstig <input type="radio"/> Mild <input type="radio"/> Matig <input type="radio"/> Zeer ernstig                               |
| 10.8   | Hoe vaak heeft u pijn in uw voet/enkel?                                                                                                                                                                                                                                                                                                                                                                                                                                                                                                                                             | <input type="radio"/> Nooit <input type="radio"/> Maandelijks <input type="radio"/> Wekelijks <input type="radio"/> Dagelijks <input type="radio"/> Altijd |

1  
2  
3  
4  
5  
6  
7  
8  
9

---

10.9 Hoeveel voet/enkel pijn heeft u gehad in de afgelopen week bij draaien als uw voet/enkel op de grond staat?

Geen  
 Mild  
 Matig  
 Ernstig  
 Zeer ernstig

---

10  
11  
12  
13  
14  
15  
16  
17  
18

---

10.10 Hoeveel voet/enkel pijn heeft u gehad in de afgelopen week bij het volledig uitstrekken van de voet/enkel?

Geen  
 Mild  
 Matig  
 Ernstig  
 Zeer ernstig

---

19  
20  
21  
22  
23  
24  
25  
26

---

10.11 Hoeveel voet/enkel pijn heeft u gehad in de afgelopen week bij het volledig naar u toe buigen/optrekken van de voet/enkel

Geen  
 Mild  
 Matig  
 Ernstig  
 Zeer ernstig

---

27  
28  
29  
30  
31  
32  
33  
34

---

10.12 Hoeveel voet/enkel pijn heeft u gehad in de afgelopen week bij het lopen op een vlakke ondergrond

Geen  
 Mild  
 Matig  
 Ernstig  
 Zeer ernstig

---

35  
36  
37  
38  
39  
40  
41  
42  
43

---

10.13 Hoeveel voet/enkel pijn heeft u gehad in de afgelopen week bij het trap op- en trap af lopen?

Geen  
 Mild  
 Matig  
 Ernstig  
 Zeer ernstig

---

44  
45  
46  
47  
48  
49  
50  
51

---

10.14 Hoeveel voet/enkel pijn heeft u gehad in de afgelopen week 's nachts in bed?

Geen  
 Mild  
 Matig  
 Ernstig  
 Zeer ernstig

---

52  
53  
54  
55  
56  
57  
58  
59  
60

---

10.15 Hoeveel voet/enkel pijn heeft u gehad in de afgelopen week bij het zitten of liggen?

Geen  
 Mild  
 Matig  
 Ernstig  
 Zeer ernstig

---

1  
2  
3  
4  
5  
6  
7  
8  
9  
10  
11  
12  
13  
14  
15  
16  
17  
18  
19  
20  
21  
22  
23  
24  
25  
26  
27  
28  
29  
30  
31  
32  
33  
34  
35  
36  
37  
38  
39  
40  
41  
42  
43  
44  
45  
46  
47  
48  
49  
50  
51  
52  
53  
54  
55  
56  
57  
58  
59  
60

|       |                                                                                                                        |                                    |                            |                             |                                    |                                    |
|-------|------------------------------------------------------------------------------------------------------------------------|------------------------------------|----------------------------|-----------------------------|------------------------------------|------------------------------------|
| 10.16 | Hoeveel voet/enkel pijn heeft u gehad in de afgelopen week bij het rechtop staan?                                      | <input type="radio"/> Geen         | <input type="radio"/> Mild | <input type="radio"/> Matig | <input type="radio"/> Ernstig      | <input type="radio"/> Zeer ernstig |
| 10.17 | In welke mate werd u gehinderd bij het trap aflopen?                                                                   | <input type="radio"/> Niet Ernstig | <input type="radio"/> Mild | <input type="radio"/> Matig | <input type="radio"/> Zeer ernstig | <input type="radio"/>              |
| 10.18 | In welke mate werd u gehinderd bij het trap op lopen?                                                                  | <input type="radio"/> Niet Ernstig | <input type="radio"/> Mild | <input type="radio"/> Matig | <input type="radio"/> Zeer ernstig | <input type="radio"/>              |
| 10.19 | In welke mate werd u gehinderd als u vanuit een zittende positie ging staan?                                           | <input type="radio"/> Niet Ernstig | <input type="radio"/> Mild | <input type="radio"/> Matig | <input type="radio"/> Zeer ernstig | <input type="radio"/>              |
| 10.20 | In welke mate werd u gehinderd bij het staan?                                                                          | <input type="radio"/> Niet Ernstig | <input type="radio"/> Mild | <input type="radio"/> Matig | <input type="radio"/> Zeer ernstig | <input type="radio"/>              |
| 10.21 | In welke mate werd u gehinderd bij het naar de grond buigen/iets oprapen?                                              | <input type="radio"/> Niet Ernstig | <input type="radio"/> Mild | <input type="radio"/> Matig | <input type="radio"/> Zeer ernstig | <input type="radio"/>              |
| 10.22 | In welke mate werd u gehinderd bij het lopen op een vlakke ondergrond?                                                 | <input type="radio"/> Niet Ernstig | <input type="radio"/> Mild | <input type="radio"/> Matig | <input type="radio"/> Zeer ernstig | <input type="radio"/>              |
| 10.23 | In welke mate werd u gehinderd bij het in- en uit de auto stappen?                                                     | <input type="radio"/> Niet Ernstig | <input type="radio"/> Mild | <input type="radio"/> Matig | <input type="radio"/> Zeer ernstig | <input type="radio"/>              |
| 10.24 | In welke mate werd u gehinderd bij het boodschappen doen?                                                              | <input type="radio"/> Niet Ernstig | <input type="radio"/> Mild | <input type="radio"/> Matig | <input type="radio"/> Zeer ernstig | <input type="radio"/>              |
| 10.25 | In welke mate werd u gehinderd bij sokken/panty's aantrekken?                                                          | <input type="radio"/> Niet Ernstig | <input type="radio"/> Mild | <input type="radio"/> Matig | <input type="radio"/> Zeer ernstig | <input type="radio"/>              |
| 10.26 | In welke mate werd u gehinderd bij het opstaan uit bed?                                                                | <input type="radio"/> Niet Ernstig | <input type="radio"/> Mild | <input type="radio"/> Matig | <input type="radio"/> Zeer ernstig | <input type="radio"/>              |
| 10.27 | In welke mate werd u gehinderd bij het sokken uittrekken?                                                              | <input type="radio"/> Niet Ernstig | <input type="radio"/> Mild | <input type="radio"/> Matig | <input type="radio"/> Zeer ernstig | <input type="radio"/>              |
| 10.28 | In welke mate werd u gehinderd bij het in bed liggen (omdraaien, lange tijd uw voet/enkel in dezelfde positie houden)? | <input type="radio"/> Niet Ernstig | <input type="radio"/> Mild | <input type="radio"/> Matig | <input type="radio"/> Zeer ernstig | <input type="radio"/>              |

|       |                                                                                                                  |                                                                                                                                                                    |                                                                      |                             |                              |
|-------|------------------------------------------------------------------------------------------------------------------|--------------------------------------------------------------------------------------------------------------------------------------------------------------------|----------------------------------------------------------------------|-----------------------------|------------------------------|
| 10.29 | In welke mate werd u gehinderd bij het in/uit bad stappen?                                                       | <input type="radio"/> Niet<br>Ernstig                                                                                                                              | <input type="radio"/> Mild<br><input type="radio"/> Zeer ernstig     | <input type="radio"/> Matig | <input type="radio"/>        |
| 10.30 | In welke mate werd u gehinderd bij zitten?                                                                       | <input type="radio"/> Niet<br>Ernstig                                                                                                                              | <input type="radio"/> Mild<br><input type="radio"/> Zeer ernstig     | <input type="radio"/> Matig | <input type="radio"/>        |
| 10.31 | In welke mate werd u gehinderd bij het toilet op en af gaan?                                                     | <input type="radio"/> Niet<br>Ernstig                                                                                                                              | <input type="radio"/> Mild<br><input type="radio"/> Zeer ernstig     | <input type="radio"/> Matig | <input type="radio"/>        |
| 10.32 | In welke mate werd u gehinderd bij zwaar huishoudelijk werk (bijvoorbeeld zware dozen sjouwen, vloer schrobben)? | <input type="radio"/> Niet<br>Ernstig                                                                                                                              | <input type="radio"/> Mild<br><input type="radio"/> Zeer ernstig     | <input type="radio"/> Matig | <input type="radio"/>        |
| 10.33 | In welke mate werd u gehinderd bij licht huishoudelijk werk (bijvoorbeeld koken, afstoffen)?                     | <input type="radio"/> Niet<br>Ernstig                                                                                                                              | <input type="radio"/> Mild<br><input type="radio"/> Zeer ernstig     | <input type="radio"/> Matig | <input type="radio"/>        |
| 10.34 | In welke mate werd u gehinderd bij hurken?                                                                       | <input type="radio"/> Niet<br>Ernstig                                                                                                                              | <input type="radio"/> Mild<br><input type="radio"/> Zeer ernstig     | <input type="radio"/> Matig | <input type="radio"/>        |
| 10.35 | In welke mate werd u gehinderd bij hardlopen?                                                                    | <input type="radio"/> Niet<br>Ernstig                                                                                                                              | <input type="radio"/> Mild<br><input type="radio"/> Zeer ernstig     | <input type="radio"/> Matig | <input type="radio"/>        |
| 10.36 | In welke mate werd u gehinderd bij springen?                                                                     | <input type="radio"/> Niet<br>Ernstig                                                                                                                              | <input type="radio"/> Mild<br><input type="radio"/> Zeer ernstig     | <input type="radio"/> Matig | <input type="radio"/>        |
| 10.37 | In welke mate werd u gehinderd bij ronddraaien op uw aangedane voet/enkel?                                       | <input type="radio"/> Niet<br>Ernstig                                                                                                                              | <input type="radio"/> Mild<br><input type="radio"/> Zeer ernstig     | <input type="radio"/> Matig | <input type="radio"/>        |
| 10.38 | In welke mate werd u gehinderd bij knielen?                                                                      | <input type="radio"/> Niet<br>Ernstig                                                                                                                              | <input type="radio"/> Mild<br><input type="radio"/> Zeer ernstig     | <input type="radio"/> Matig | <input type="radio"/>        |
| 10.39 | Hoe vaak bent u zich bewust van uw voet/enkel probleem?                                                          | <input type="radio"/> Nooit<br>Wekelijks                                                                                                                           | <input type="radio"/> Maandelijks<br><input type="radio"/> Dagelijks | <input type="radio"/>       | <input type="radio"/> Altijd |
| 10.40 | Heeft u uw leven veranderd om activiteiten te vermijden die schadelijk kunnen zijn voor uw voet/enkel?           | <input type="radio"/> Niet<br><input type="radio"/> Enigszins<br><input type="radio"/> Matig<br><input type="radio"/> Behoorlijk<br><input type="radio"/> Volledig |                                                                      |                             |                              |



1  
2  
3  
4  
5  
6  
7  
8  
9

---

10.41 In hoeverre kunt u op uw voet/enkel vertrouwen?

Volledig  
 Behoorlijk  
 Matig  
 Enigzins  
 Niet

10  
11  
12  
13  
14  
15  
16  
17  
18  
19  
20  
21  
22

---

10.42 In het algemeen, in welke mate ondervindt u hinder van uw voet/enkel

Geen  
 Mild  
 Matig  
 Ernstig  
 Zeer ernstig

## 23 Vragenlijst PRIMA studie 5 jaar - Dank

24  
25  
26  
27

| Number | Question | Answers |
|--------|----------|---------|
|--------|----------|---------|

28  
29  
30  
31  
32  
33  
34  
35  
36  
37

|      |                                                                                                                                               |                                                                          |
|------|-----------------------------------------------------------------------------------------------------------------------------------------------|--------------------------------------------------------------------------|
| 11.1 | Hartelijk dank voor de tijd die u heeft genomen om de vragenlijsten in te vullen. Indien u nog opmerkingen heeft kunt u deze hierin plaatsen. | <div style="border: 1px dashed black; width: 100%; height: 50px;"></div> |
|------|-----------------------------------------------------------------------------------------------------------------------------------------------|--------------------------------------------------------------------------|

## 38 Survey 'Vragenlijst PRIMA studie 52 weken'

### 41 Vragenlijst PRIMA studie 52 weken - AOFAS - Pijn

42  
43  
44  
45

| Number | Question | Answers |
|--------|----------|---------|
|--------|----------|---------|

46  
47  
48  
49  
50  
51  
52  
53  
54  
55  
56

|     |                                     |                                                                                                                                                                                                                 |
|-----|-------------------------------------|-----------------------------------------------------------------------------------------------------------------------------------------------------------------------------------------------------------------|
| 1.1 | Hoeveel pijn ervaart u aan uw voet? | <input type="checkbox"/> Geen<br><input type="checkbox"/> Milde pijnklachten of af en toe pijn<br><input type="checkbox"/> Matige pijnklachten, dagelijks<br><input type="checkbox"/> Vrijwel continu erge pijn |
|-----|-------------------------------------|-----------------------------------------------------------------------------------------------------------------------------------------------------------------------------------------------------------------|

### 57 Vragenlijst PRIMA studie 52 weken - AOFAS resterende gedeelte

58  
59  
60

| Number | Question                                                                                                                   | Answers                                                                                                                                                                                                                                                                                                                                                                                                                                           |
|--------|----------------------------------------------------------------------------------------------------------------------------|---------------------------------------------------------------------------------------------------------------------------------------------------------------------------------------------------------------------------------------------------------------------------------------------------------------------------------------------------------------------------------------------------------------------------------------------------|
| 2.1    | Hoeveel beperkingen in het dagelijks leven ervaart u?                                                                      | <input type="radio"/> Geen beperkingen, geen hulpmiddelen nodig<br><input type="radio"/> Geen beperkingen in algemeen dagelijkse bezigheden, wel beperkingen in recreatieve activiteiten (sport, hobbies, etc) geen ondersteuning<br><input type="radio"/> Beperkingen bij dagelijkse- en recreatieve activiteiten, stok<br><input type="radio"/> Ernstige beperkingen bij dagelijkse- en recreatieactiviteiten, walker, krukken, rolstoel, brace |
| 2.2    | Wat is de afstand die u in één keer kunt lopen?                                                                            | <input type="radio"/> Meer dan 600 meter<br><input type="radio"/> 400 - 600 meter<br><input type="radio"/> 100 - 300 meter<br><input type="radio"/> Minder dan 100 meter                                                                                                                                                                                                                                                                          |
| 2.3    | Heeft u moeite met lopen op een bepaalde ondergrond?                                                                       | <input type="radio"/> Geen problemen bij lopen<br><input type="radio"/> Enig problemen op ongelijke ondergrond, trap, helling, ladders<br><input type="radio"/> Ernstige problemen bij ongelijke ondergrond, trap, helling, ladders                                                                                                                                                                                                               |
| 2.4    | Hoe zou u uw looppatroon beoordelen?                                                                                       | <input type="radio"/> Normaal of minimaal afwijkend<br><input type="radio"/> Duidelijk<br><input type="radio"/> Ernstig                                                                                                                                                                                                                                                                                                                           |
| 2.5    | Hoe zou u de beweeglijkheid van uw voet beoordelen ten opzichte van de andere zijde of ten opzichte van vóór het ongeval?  | <input type="radio"/> Hetzelfde of licht beperkt t.o.v. de niet aangedane zijde of zoals voor het ongeval<br><input type="radio"/> Ongeveer de helft beperkt<br><input type="radio"/> Sterk verminderd, bijna geen bewegingen mogelijk                                                                                                                                                                                                            |
| 2.6    | Hoe zou u de beweeglijkheid van uw enkel beoordelen ten opzichte van de andere zijde of ten opzichte van voor het ongeval? | <input type="radio"/> Hetzelfde of licht beperkt t.o.v. de niet aangedane zijde of zoals voor het ongeval<br><input type="radio"/> Ongeveer de helft beperkt<br><input type="radio"/> Sterk verminderd, bijna geen bewegingen mogelijk                                                                                                                                                                                                            |
| 2.7    | Hoe zou u de stabiliteit van uw voet en enkel beoordelen                                                                   | <input type="radio"/> Stabiel, ik verzwik mijn enkel hooguit incidenteel<br><input type="radio"/> Niet stabiel, ik verzwik mijn enkel vaak                                                                                                                                                                                                                                                                                                        |

- 1  
2  
3  
4  
5  
6  
7  
8  
9  
10  
11  
12  
13  
14  
15  
16  
17  
18  
19  
20  
21  
22  
23  
24  
25  
26  
27  
28  
29  
30  
31  
32  
33  
34  
35  
36  
37  
38  
39  
40  
41  
42  
43  
44  
45  
46  
47  
48  
49  
50  
51  
52  
53  
54  
55  
56  
57  
58  
59  
60
- 
- 2.8      Hoe zou u de stand van uw voet beoordelen ten opzichte van de andere zijde of ten opzichte van voor het ongeval?
- Goed, ik kan mijn voet goed plat op de grond zetten, waarbij de stand niet afwijkend is
- Ik sta vrijwel alleen op de buitenzijde van mijn voet
- Ik kan mijn voet niet plat op de grond zetten en loop vrijwel alleen op mijn voorvoet

## Vragenlijst PRIMA studie 52 weken - VAS Pain score

| Number | Question                                                                                                                                                             | Answers                     |
|--------|----------------------------------------------------------------------------------------------------------------------------------------------------------------------|-----------------------------|
| 3.1    | VAS pijnscore (Geef uw minimaal pijnscore aan tijdens dagelijkse activiteiten op een schaal van 0 tot 100, waarbij 0 geen pijn is en 100 de ergste pijn denkbaar is) | (0.00)      100<br>(100.00) |

## Vragenlijst PRIMA studie 52 weken - AAS

| Number | Question | Answers |
|--------|----------|---------|
|--------|----------|---------|

- 1  
2  
3  
4  
5  
6  
7  
8  
9  
10  
11  
12  
13  
14  
15  
16  
17  
18  
19  
20  
21  
22  
23  
24  
25  
26  
27  
28  
29  
30  
31  
32  
33  
34  
35  
36  
37  
38  
39  
40  
41  
42  
43  
44  
45  
46  
47  
48  
49  
50  
51  
52  
53  
54  
55  
56  
57  
58  
59  
60
- 4.1 Wat is het meest bij u van toepassing ten aanzien van uw activiteit?
- American Football
  - Basketbal
  - Gymnastiek/turnen
  - Handbal
  - Rugby
  - Voetbal
  - Hockey
  - Korfbal
  - Gevechtssporten: judo, karate, kung fu, taekwando, jiu jitsu, etc.
  - Oriëntatiewandelen
  - Rhythmische gymnastiek
  - Volleybal
  - Boxen
  - Freestyle snowboarden
  - IJshockey
  - Tennis
  - Worstelen
  - Fitness, aerobics
  - Badminton
  - Baseball
  - Cross-country hardlopen
  - Moderne pentathlon
  - Squash
  - Surfen, windsurfen
  - Tafel tennis
  - Atletiek: spring-, werponderdelen
  - Waterskiën
  - Dans
  - Schermen
  - Zaalhockey
  - Bergbeklimmen
  - Langlauf
  - Parachute springen
  - Softball
  - Speciale beroepen en werkactiviteiten; speciale beroepen: ballet, professioneel soldaat, speciale reddingswerker, stuntman, etc.
  - Duiken
  - Scubaduiken
  - Skaten, in-line skaten
  - Atletiek: looponderdelen
  - Triatlon
  - Gewichtsheffen, body-building

- Alle competitieve sporten hieronder met 'seasonal' conditioning
- Zwaar fysiek werk
- Alpine skiën en snowboarden
- Bowlen/curlen
- Golf
- Mountainbike/BMX
- Powerliften
- Zeilen
- Fysiek werk
- Wielrennen
- Paardrijden
- Motorsporten/technische sporten
- Roeien, kayakken
- Boogschieten
- Water polo en zwemmen
- Kunnen lopen op oneven grond
- Geen sport, echter geen limitatie in dagelijkse activiteiten
- Kunnen lopen op even grond, maar de dagelijkse activiteiten zijn gelimiteerd
- Niet kunnen lopen, fysieke handicap wegens enkelproblemen

- 
- 4.1.1 ***If 'Wat is het meest bij u van toepassing ten aanzien van uw activiteit?' is equal to 'American Football' answer this question:***  
American Football
- Professioneel
- Competitief
- Recreatief
- 
- 4.1.2 ***If 'Wat is het meest bij u van toepassing ten aanzien van uw activiteit?' is equal to 'Basketbal' answer this question:***  
Basketbal
- Professioneel
- Competitief
- Recreatief
- 
- 4.1.3 ***If 'Wat is het meest bij u van toepassing ten aanzien van uw activiteit?' is equal to 'Gymnastiek/turnen' answer this question:***  
Gymnastiek/turnen
- Professioneel
- Competitief
- Recreatief
- 
- 4.1.4 ***If 'Wat is het meest bij u van toepassing ten aanzien van uw activiteit?' is equal to 'Handbal' answer this question:***  
Handbal
- Professioneel
- Competitief
- Recreatief
- 
- 4.1.5 ***If 'Wat is het meest bij u van toepassing ten aanzien van uw activiteit?' is equal to 'Rugby' answer this question:***  
Rugby
- Professioneel
- Competitief
- Recreatief

|    |        |                                                                                                                                                                                          |                                     |
|----|--------|------------------------------------------------------------------------------------------------------------------------------------------------------------------------------------------|-------------------------------------|
| 1  |        |                                                                                                                                                                                          |                                     |
| 2  | 4.1.6  | <b>If 'Wat is het meest bij u van toepassing ten aanzien van uw acitiviteit?' is equal to 'Voetbal' answer this question:</b>                                                            | <input type="radio"/> Professioneel |
| 3  |        |                                                                                                                                                                                          | <input type="radio"/> Competitief   |
| 4  |        |                                                                                                                                                                                          | <input type="radio"/> Recreatief    |
| 5  |        | Voetbal                                                                                                                                                                                  |                                     |
| 6  |        |                                                                                                                                                                                          |                                     |
| 7  |        |                                                                                                                                                                                          |                                     |
| 8  | 4.1.7  | <b>If 'Wat is het meest bij u van toepassing ten aanzien van uw acitiviteit?' is equal to 'Hockey' answer this question:</b>                                                             | <input type="radio"/> Professioneel |
| 9  |        |                                                                                                                                                                                          | <input type="radio"/> Competitief   |
| 10 |        |                                                                                                                                                                                          | <input type="radio"/> Recreatief    |
| 11 |        | Hockey                                                                                                                                                                                   |                                     |
| 12 |        |                                                                                                                                                                                          |                                     |
| 13 |        |                                                                                                                                                                                          |                                     |
| 14 | 4.1.8  | <b>If 'Wat is het meest bij u van toepassing ten aanzien van uw acitiviteit?' is equal to 'Korfbal' answer this question:</b>                                                            | <input type="radio"/> Professioneel |
| 15 |        |                                                                                                                                                                                          | <input type="radio"/> Competitief   |
| 16 |        |                                                                                                                                                                                          | <input type="radio"/> Recreatief    |
| 17 |        | Korfbal                                                                                                                                                                                  |                                     |
| 18 |        |                                                                                                                                                                                          |                                     |
| 19 |        |                                                                                                                                                                                          |                                     |
| 20 | 4.1.9  | <b>If 'Wat is het meest bij u van toepassing ten aanzien van uw acitiviteit?' is equal to 'Gevechtssporten: judo, karate, kung fu, taekwando, jiu jitsu, etc.' answer this question:</b> | <input type="radio"/> Professioneel |
| 21 |        |                                                                                                                                                                                          | <input type="radio"/> Competitief   |
| 22 |        |                                                                                                                                                                                          | <input type="radio"/> Recreatief    |
| 23 |        | Gevechtssporten: judo, karate, kung fu, taekwando, jiu                                                                                                                                   |                                     |
| 24 |        | jitsu, etc.                                                                                                                                                                              |                                     |
| 25 |        |                                                                                                                                                                                          |                                     |
| 26 |        |                                                                                                                                                                                          |                                     |
| 27 | 4.1.10 | <b>If 'Wat is het meest bij u van toepassing ten aanzien van uw acitiviteit?' is equal to 'Oriëntatielopen' answer this question:</b>                                                    | <input type="radio"/> Professioneel |
| 28 |        |                                                                                                                                                                                          | <input type="radio"/> Competitief   |
| 29 |        |                                                                                                                                                                                          | <input type="radio"/> Recreatief    |
| 30 |        | Oriëntatielopen                                                                                                                                                                          |                                     |
| 31 |        |                                                                                                                                                                                          |                                     |
| 32 |        |                                                                                                                                                                                          |                                     |
| 33 | 4.1.11 | <b>If 'Wat is het meest bij u van toepassing ten aanzien van uw acitiviteit?' is equal to 'Rhythmische gymnastiek' answer this question:</b>                                             | <input type="radio"/> Professioneel |
| 34 |        |                                                                                                                                                                                          | <input type="radio"/> Competitief   |
| 35 |        |                                                                                                                                                                                          | <input type="radio"/> Recreatief    |
| 36 |        | Rhythmisch gymnastiek                                                                                                                                                                    |                                     |
| 37 |        |                                                                                                                                                                                          |                                     |
| 38 |        |                                                                                                                                                                                          |                                     |
| 39 | 4.1.12 | <b>If 'Wat is het meest bij u van toepassing ten aanzien van uw acitiviteit?' is equal to 'Volleybal' answer this question:</b>                                                          | <input type="radio"/> Professioneel |
| 40 |        |                                                                                                                                                                                          | <input type="radio"/> Competitief   |
| 41 |        |                                                                                                                                                                                          | <input type="radio"/> Recreatief    |
| 42 |        | Volleybal                                                                                                                                                                                |                                     |
| 43 |        |                                                                                                                                                                                          |                                     |
| 44 | 4.1.13 | <b>If 'Wat is het meest bij u van toepassing ten aanzien van uw acitiviteit?' is equal to 'Boxen' answer this question:</b>                                                              | <input type="radio"/> Professioneel |
| 45 |        |                                                                                                                                                                                          | <input type="radio"/> Competitief   |
| 46 |        |                                                                                                                                                                                          | <input type="radio"/> Recreatief    |
| 47 |        | Boxen                                                                                                                                                                                    |                                     |
| 48 |        |                                                                                                                                                                                          |                                     |
| 49 |        |                                                                                                                                                                                          |                                     |
| 50 | 4.1.14 | <b>If 'Wat is het meest bij u van toepassing ten aanzien van uw acitiviteit?' is equal to 'Freestyle snowboarden' answer this question:</b>                                              | <input type="radio"/> Professioneel |
| 51 |        |                                                                                                                                                                                          | <input type="radio"/> Competitief   |
| 52 |        |                                                                                                                                                                                          | <input type="radio"/> Recreatief    |
| 53 |        | Freestyle snowboarden                                                                                                                                                                    |                                     |
| 54 |        |                                                                                                                                                                                          |                                     |
| 55 |        |                                                                                                                                                                                          |                                     |
| 56 | 4.1.15 | <b>If 'Wat is het meest bij u van toepassing ten aanzien van uw acitiviteit?' is equal to 'Freestyle snowboarden' answer this question:</b>                                              | <input type="radio"/> Professioneel |
| 57 |        |                                                                                                                                                                                          | <input type="radio"/> Competitief   |
| 58 |        |                                                                                                                                                                                          | <input type="radio"/> Recreatief    |
| 59 |        | IJshockey                                                                                                                                                                                |                                     |
| 60 |        |                                                                                                                                                                                          |                                     |

- 1  
2  
3  
4  
5  
6  
7
- 4.1.16 ***If 'Wat is het meest bij u van toepassing ten aanzien van uw acitiviteit?' is equal to 'Tennis' answer this question:***  
Tennis  Professioneel  
 Competitief  
 Recreatief
- 
- 8  
9  
10  
11  
12
- 4.1.17 ***If 'Wat is het meest bij u van toepassing ten aanzien van uw acitiviteit?' is equal to 'Worstelen' answer this question:***  
Worstelen  Professioneel  
 Competitief  
 Recreatief
- 
- 13  
14  
15  
16  
17  
18
- 4.1.18 ***If 'Wat is het meest bij u van toepassing ten aanzien van uw acitiviteit?' is equal to 'Fitness, aerobics' answer this question:***  
Fitness, aerobics  Professioneel  
 Competitief  
 Recreatief
- 
- 19  
20  
21  
22  
23  
24
- 4.1.19 ***If 'Wat is het meest bij u van toepassing ten aanzien van uw acitiviteit?' is equal to 'Badminton' answer this question:***  
Badminton  Professioneel  
 Competitief  
 Recreatief
- 
- 25  
26  
27  
28  
29  
30
- 4.1.20 ***If 'Wat is het meest bij u van toepassing ten aanzien van uw acitiviteit?' is equal to 'Baseball' answer this question:***  
Baseball  Professioneel  
 Competitief  
 Recreatief
- 
- 31  
32  
33  
34  
35
- 4.1.21 ***If 'Wat is het meest bij u van toepassing ten aanzien van uw acitiviteit?' is equal to 'Cross-country hardlopen' answer this question:***  
Cross-country hardlopen  Professioneel  
 Competitief  
 Recreatief
- 
- 36  
37  
38  
39  
40  
41
- 4.1.22 ***If 'Wat is het meest bij u van toepassing ten aanzien van uw acitiviteit?' is equal to 'Moderne pentathlon' answer this question:***  
Moderne pentathlon  Professioneel  
 Competitief  
 Recreatief
- 
- 42  
43  
44  
45  
46  
47
- 4.1.23 ***If 'Wat is het meest bij u van toepassing ten aanzien van uw acitiviteit?' is equal to 'Squash' answer this question:***  
Squash  Professioneel  
 Competitief  
 Recreatief
- 
- 48  
49  
50  
51  
52  
53
- 4.1.24 ***If 'Wat is het meest bij u van toepassing ten aanzien van uw acitiviteit?' is equal to 'Surfen, windsurfen' answer this question:***  
Surfen, windsurfen  Professioneel  
 Competitief  
 Recreatief
- 
- 54  
55  
56  
57  
58  
59  
60
- 4.1.25 ***If 'Wat is het meest bij u van toepassing ten aanzien van uw acitiviteit?' is equal to 'Tafel tennis' answer this question:***  
Tafel tennis  Professioneel  
 Competitief  
 Recreatief

- 1  
2  
3  
4  
5  
6  
7
- 4.1.26 **If 'Wat is het meest bij u van toepassing ten aanzien van uw acitiviteit?' is equal to 'Atletiek: spring-, werponderdelen' answer this question:**  
Atletiek: spring-, werponderdelen
- Professioneel  
 Competitief  
 Recreatief
- 
- 8  
9  
10  
11  
12
- 4.1.27 **If 'Wat is het meest bij u van toepassing ten aanzien van uw acitiviteit?' is equal to 'Waterskieën' answer this question:**  
Waterskien
- Professioneel  
 Competitief  
 Recreatief
- 
- 13  
14  
15  
16  
17  
18
- 4.1.28 **If 'Wat is het meest bij u van toepassing ten aanzien van uw acitiviteit?' is equal to 'Dans' answer this question:**  
Dans
- Professioneel  
 Competitief  
 Recreatief
- 
- 19  
20  
21  
22  
23  
24
- 4.1.29 **If 'Wat is het meest bij u van toepassing ten aanzien van uw acitiviteit?' is equal to 'Schermen' answer this question:**  
Schermen
- Professioneel  
 Competitief  
 Recreatief
- 
- 25  
26  
27  
28  
29  
30
- 4.1.30 **If 'Wat is het meest bij u van toepassing ten aanzien van uw acitiviteit?' is equal to 'Zaalhockey' answer this question:**  
Zaalhockey
- Professioneel  
 Competitief  
 Recreatief
- 
- 31  
32  
33  
34  
35
- 4.1.31 **If 'Wat is het meest bij u van toepassing ten aanzien van uw acitiviteit?' is equal to 'Bergbeklimmen' answer this question:**  
Bergbeklimmen
- Professioneel  
 Competitief  
 Recreatief
- 
- 36  
37  
38  
39  
40  
41
- 4.1.32 **If 'Wat is het meest bij u van toepassing ten aanzien van uw acitiviteit?' is equal to 'Langlauf' answer this question:**  
Langlauf
- Professioneel  
 Competitief  
 Recreatief
- 
- 42  
43  
44  
45  
46  
47
- 4.1.33 **If 'Wat is het meest bij u van toepassing ten aanzien van uw acitiviteit?' is equal to 'Parachute springen' answer this question:**  
Parachute springen
- Professioneel  
 Competitief  
 Recreatief
- 
- 48  
49  
50  
51  
52  
53  
54  
55  
56  
57  
58  
59  
60
- 4.1.34 **If 'Wat is het meest bij u van toepassing ten aanzien van uw acitiviteit?' is equal to 'Softball' answer this question:**  
Softball
- Professioneel  
 Competitief  
 Recreatief



- 1  
2  
3  
4  
5  
6  
7  
8  
9  
10  
11  
12
- 4.1.35 ***If 'Wat is het meest bij u van toepassing ten aanzien van uw acitiviteit?' is equal to 'Speciale beroepen en werkactiviteiten; speciale beroepen: ballet, professioneel soldaat, speciale reddingswerker, stuntman, etc.' answer this question:***  
Speciale beroepen en werkactiviteiten speciale beroepen: ballet, professioneel soldaat, speciale reddingswerker, stuntman, etc.
- ballet, professioneel soldaat, speciale reddingswerker, stuntman, etc.
- 
- 13  
14  
15  
16  
17
- 4.1.36 ***If 'Wat is het meest bij u van toepassing ten aanzien van uw acitiviteit?' is equal to 'Duiken' answer this question:***  
Duiken
- Professioneel/competitief  
 Recreatief
- 
- 18  
19  
20  
21  
22
- 4.1.37 ***If 'Wat is het meest bij u van toepassing ten aanzien van uw acitiviteit?' is equal to 'Scubaduiken' answer this question:***  
Scubaduiken
- Professioneel/competitief  
 Recreatief
- 
- 23  
24  
25  
26  
27  
28
- 4.1.38 ***If 'Wat is het meest bij u van toepassing ten aanzien van uw acitiviteit?' is equal to 'Skaten, in-line skaten' answer this question:***  
skaten, in-linen skaten
- Professioneel/competitief  
 Recreatief
- 
- 29  
30  
31  
32  
33
- 4.1.39 ***If 'Wat is het meest bij u van toepassing ten aanzien van uw acitiviteit?' is equal to 'Atletiek: looponderdelen' answer this question:***  
Atletiek: looponderdelen
- Professioneel/competitief  
 Recreatief
- 
- 34  
35  
36  
37  
38
- 4.1.40 ***If 'Wat is het meest bij u van toepassing ten aanzien van uw acitiviteit?' is equal to 'Triatlon' answer this question:***  
triatlon
- Professioneel/competitief  
 Recreatief
- 
- 39  
40  
41  
42  
43  
44  
45
- 4.1.41 ***If 'Wat is het meest bij u van toepassing ten aanzien van uw acitiviteit?' is equal to 'Gewichtsheffen, body-building' answer this question:***  
Gewichtsheffen, body-building
- Professioneel/competitief  
 Recreatief
- 
- 46  
47  
48  
49  
50  
51  
52
- 4.1.42 ***If 'Wat is het meest bij u van toepassing ten aanzien van uw acitiviteit?' is equal to 'Alle competitieve sporten hieronder met 'seasonal' conditioning' answer this question:***  
Alle competitieve sporten hieronder met 'seasonal' conditioning
- Alle competitieve sporten hieronder met 'seasonal' conditioning
- 
- 53  
54  
55  
56  
57  
58  
59  
60
- 4.1.43 ***If 'Wat is het meest bij u van toepassing ten aanzien van uw acitiviteit?' is equal to 'Zwaar fysiek werk' answer this question:***  
Zwaar fysiek werk
- Alle competitieve sporten hieronder met 'seasonal' conditioning

- 1  
2  
3  
4  
5  
6  
7  
8  
9  
10  
11  
12  
13  
14  
15  
16  
17  
18  
19  
20  
21  
22  
23  
24  
25  
26  
27  
28  
29  
30  
31  
32  
33  
34  
35  
36  
37  
38  
39  
40  
41  
42  
43  
44  
45  
46  
47  
48  
49  
50  
51  
52  
53  
54  
55  
56  
57  
58  
59  
60
- 
- 4.1.44 ***If 'Wat is het meest bij u van toepassing ten aanzien van uw acitiviteit?' is equal to 'Alpine skiën en snowboarden' answer this question:***  
Alpine skien en snowboarden  Alpine skien en snowboarden
- 
- 4.1.45 ***If 'Wat is het meest bij u van toepassing ten aanzien van uw acitiviteit?' is equal to 'Bowlen/curlen' answer this question:***  
Bowlen/curlen  Bowlen/curlen
- 
- 4.1.46 ***If 'Wat is het meest bij u van toepassing ten aanzien van uw acitiviteit?' is equal to 'Golf' answer this question:***  
Golf  Golf
- 
- 4.1.47 ***If 'Wat is het meest bij u van toepassing ten aanzien van uw acitiviteit?' is equal to 'Mountainbike/BMX' answer this question:***  
Mountainbike/BMX  Mountainbike/BMX
- 
- 4.1.48 ***If 'Wat is het meest bij u van toepassing ten aanzien van uw acitiviteit?' is equal to 'Powerliften' answer this question:***  
Powerliften  Powerliften
- 
- 4.1.49 ***If 'Wat is het meest bij u van toepassing ten aanzien van uw acitiviteit?' is equal to 'Zeilen' answer this question:***  
Zeilen  Zeilen
- 
- 4.1.50 ***If 'Wat is het meest bij u van toepassing ten aanzien van uw acitiviteit?' is equal to 'Fysiek werk' answer this question:***  
Fysiek werk  Fysiek werk
- 
- 4.1.51 ***If 'Wat is het meest bij u van toepassing ten aanzien van uw acitiviteit?' is equal to 'Wielrennen' answer this question:***  
Wielrennen  Wielrennen
- 
- 4.1.52 ***If 'Wat is het meest bij u van toepassing ten aanzien van uw acitiviteit?' is equal to 'Paardrijden' answer this question:***  
Paardrijden  Paardrijden
- 
- 4.1.53 ***If 'Wat is het meest bij u van toepassing ten aanzien van uw acitiviteit?' is equal to 'Motorsporten/technische sporten' answer this question:***  
Motorsporten/technische sporten  Motorsporten/technische sporten
- 
- 4.1.54 ***If 'Wat is het meest bij u van toepassing ten aanzien van uw acitiviteit?' is equal to 'Roeien, kayakken' answer this question:***  
Roeien, kayakken  Roeien, kayakken

|        |                                                                                                                                                                                                                                                                                   |                                                                                                    |
|--------|-----------------------------------------------------------------------------------------------------------------------------------------------------------------------------------------------------------------------------------------------------------------------------------|----------------------------------------------------------------------------------------------------|
| 4.1.55 | <b>If 'Wat is het meest bij u van toepassing ten aanzien van uw activiteit?' is equal to 'Boogschieten' answer this question:</b><br>Boogschieten                                                                                                                                 | <input type="radio"/> Boogschieten                                                                 |
| 4.1.56 | <b>If 'Wat is het meest bij u van toepassing ten aanzien van uw activiteit?' is equal to 'Water polo en zwemmen' answer this question:</b><br>Water polo en zwemmen                                                                                                               | <input type="radio"/> Water polo en zwemmen                                                        |
| 4.1.57 | <b>If 'Wat is het meest bij u van toepassing ten aanzien van uw activiteit?' is equal to 'Kunnen lopen op oneven grond' answer this question:</b><br>Kunnen lopen op oneven grond                                                                                                 | <input type="radio"/> Kunnen lopen op oneven grond                                                 |
| 4.1.58 | <b>If 'Wat is het meest bij u van toepassing ten aanzien van uw activiteit?' is equal to 'Geen sport, echter geen limitatie in dagelijkse activiteiten' answer this question:</b><br>Geen sport, echter geen limitatie in dagelijkse activiteiten                                 | <input type="radio"/> Geen sport, echter geen limitatie in dagelijkse activiteiten                 |
| 4.1.59 | <b>If 'Wat is het meest bij u van toepassing ten aanzien van uw activiteit?' is equal to 'Kunnen lopen op even grond, maar de dagelijkse activiteiten zijn gelimiteerd' answer this question:</b><br>Kunnen lopen op even grond, maar de dagelijkse activiteiten zijn gelimiteerd | <input type="radio"/> Kunnen lopen op even grond, maar de dagelijkse activiteiten zijn gelimiteerd |
| 4.1.60 | <b>If 'Wat is het meest bij u van toepassing ten aanzien van uw activiteit?' is equal to 'Niet kunnen lopen, fysieke handicap wegens enkelproblemen' answer this question:</b><br>Niet kunnen lopen, fysieke handicap wegens enkelproblemen                                       | <input type="radio"/> Niet kunnen lopen, fysieke handicap wegens enkelproblemen                    |

## Vragenlijst PRIMA studie 52 weken - Hoe tevreden bent u over de enkelklachten?

| Number | Question                                   | Answers                                                                                                                       |
|--------|--------------------------------------------|-------------------------------------------------------------------------------------------------------------------------------|
| 5.1    | Hoe tevreden bent u over de enkelklachten? | <input type="radio"/> Slecht<br><input type="radio"/> Matig<br><input type="radio"/> Goed<br><input type="radio"/> Uitstekend |

## Vragenlijst PRIMA studie 52 weken - SF-36

| Number | Question                                                                                                                                                                                                                                                                                                                                                           | Answers                                                                                                                                                                                                                                                                                   |
|--------|--------------------------------------------------------------------------------------------------------------------------------------------------------------------------------------------------------------------------------------------------------------------------------------------------------------------------------------------------------------------|-------------------------------------------------------------------------------------------------------------------------------------------------------------------------------------------------------------------------------------------------------------------------------------------|
|        | Deze vragenlijst gaat over uw standpunten t.a.v. uw gezondheid. Met behulp van deze gegevens kan worden bijgehouden hoe u zich voelt en hoe goed u in staat bent uw gebruikelijke bezigheden uit te voeren. Beantwoord elke vraag door een antwoord aan te klikken. Als u niet zeker weet hoe u een vraag moet beantwoorden, geef dan het best mogelijke antwoord. |                                                                                                                                                                                                                                                                                           |
| 6.1    | Hoe zou u over het algemeen uw gezondheid noemen?                                                                                                                                                                                                                                                                                                                  | <input type="radio"/> Uitstekend <input type="radio"/> Zeer goed <input type="radio"/> Goed <input type="radio"/> Matig <input type="radio"/> Slecht                                                                                                                                      |
| 6.2    | Hoe beoordeelt u nu uw gezondheid over het algemeen vergeleken met een jaar geleden?                                                                                                                                                                                                                                                                               | <input type="radio"/> Veel beter dan een jaar geleden <input type="radio"/> Wat beter dan een jaar geleden <input type="radio"/> Ongeveer hetzelfde als een jaar geleden <input type="radio"/> Wat slechter dan een jaar geleden <input type="radio"/> Veel slechter dan een jaar geleden |
| 6.3    | Wordt u door uw gezondheid op dit moment beperkt bij forse inspanning, zoals hardlopen, tillen van zware voorwerpen of een veeleisende sport beoefenen?                                                                                                                                                                                                            | <input type="radio"/> Ja, ernstig beperkt <input type="radio"/> Ja, een beetje beperkt <input type="radio"/> Nee, helemaal niet beperkt                                                                                                                                                   |
| 6.4    | Wordt u door uw gezondheid op dit moment beperkt bij matige inspanning zoals een tafel verplaatsen, stofzuigen, zwemmen of fietsen?                                                                                                                                                                                                                                | <input type="radio"/> Ja, ernstig beperkt <input type="radio"/> Ja, een beetje beperkt <input type="radio"/> Nee, helemaal niet beperkt                                                                                                                                                   |
| 6.5    | Wordt u door uw gezondheid op dit moment beperkt bij boodschappen tillen of dragen?                                                                                                                                                                                                                                                                                | <input type="radio"/> Ja, ernstig beperkt <input type="radio"/> Ja, een beetje beperkt <input type="radio"/> Nee, helemaal niet beperkt                                                                                                                                                   |
| 6.6    | Wordt u door uw gezondheid op dit moment beperkt bij een paar trappen oplopen?                                                                                                                                                                                                                                                                                     | <input type="radio"/> Ja, ernstig beperkt <input type="radio"/> Ja, een beetje beperkt <input type="radio"/> Nee, helemaal niet beperkt                                                                                                                                                   |
| 6.7    | Wordt u door uw gezondheid op dit moment beperkt bij één trap oplopen?                                                                                                                                                                                                                                                                                             | <input type="radio"/> Ja, ernstig beperkt <input type="radio"/> Ja, een beetje beperkt <input type="radio"/> Nee, helemaal niet beperkt                                                                                                                                                   |
| 6.8    | Wordt u door uw gezondheid op dit moment beperkt bij bukken, knielen of hurken?                                                                                                                                                                                                                                                                                    | <input type="radio"/> Ja, ernstig beperkt <input type="radio"/> Ja, een beetje beperkt <input type="radio"/> Nee, helemaal niet beperkt                                                                                                                                                   |
| 6.9    | Wordt u door uw gezondheid op dit moment beperkt bij meer dan één kilometer lopen?                                                                                                                                                                                                                                                                                 | <input type="radio"/> Ja, ernstig beperkt <input type="radio"/> Ja, een beetje beperkt <input type="radio"/> Nee, helemaal niet beperkt                                                                                                                                                   |
| 6.10   | Wordt u door uw gezondheid op dit moment beperkt bij een paar honderd meter lopen?                                                                                                                                                                                                                                                                                 | <input type="radio"/> Ja, ernstig beperkt <input type="radio"/> Ja, een beetje beperkt <input type="radio"/> Nee, helemaal niet beperkt                                                                                                                                                   |

- 1  
2  
3  
4  
5
- 6.11 Wordt u door uw gezondheid op dit moment beperkt bij ongeveer honderd meter lopen?  Ja, ernstig beperkt  Ja, een beetje beperkt  Nee, helemaal niet beperkt
- 
- 6.12 Wordt u door uw gezondheid op dit moment beperkt bij uzelf wassen of aankleden?  Ja, ernstig beperkt  Ja, een beetje beperkt  Nee, helemaal niet beperkt
- 
- 6.13 U besteedde in de afgelopen 4 weken minder tijd aan werk of andere bezigheden  Ja  Nee
- 
- 6.14 U heeft in de afgelopen 4 weken minder bereikt dan u zou willen  Ja  Nee
- 
- 6.15 U was in de afgelopen 4 weken beperkt in het soort werk of andere bezigheden.  Ja  Nee
- 
- 6.16 U had de afgelopen 4 weken moeite om uw werk of andere bezigheden uit te voeren (het kostte u bijvoorbeeld extra inspanning).  Ja  Nee
- 
- 6.17 U besteedde in de afgelopen 4 weken minder tijd aan werk of andere bezigheden ten gevolge van emotionele problemen  Ja  Nee
- 
- 6.18 U heeft in de afgelopen 4 weken minder bereikt dan u zou willen ten gevolge van emotionele problemen.  Ja  Nee
- 
- 6.19 U deed de afgelopen 4 weken uw werk of andere bezigheden niet zo zorgvuldig als gewoonlijk ten gevolge van emotionele problemen.  Ja  Nee
- 
- 6.20 In hoeverre hebben uw lichamelijke gezondheid of emotionele problemen u gedurende de afgelopen 4 weken gehinderd in uw normale omgang met familie, vrienden of burens, of bij activiteiten in groepsverband?  Helemaal niet  Enigszins  Nogal  Veel  Heel erg veel
- 
- 6.21 Hoeveel lichamelijke pijn heeft u de afgelopen 4 weken gehad?  Geen  Heel licht  Licht  Nogal  Ernstig  Heel ernstig
- 
- 6.22 In welke mate bent u de afgelopen 4 weken door de pijn gehinderd in uw normale werk (zowel werk buitenshuis als huishoudelijk werk)?  Helemaal niet  Een klein beetje  Nogal  Veel  Heel erg veel
- 6  
7  
8  
9  
10  
11  
12  
13  
14  
15  
16  
17  
18  
19  
20  
21  
22  
23  
24  
25  
26  
27  
28  
29  
30  
31  
32  
33  
34  
35  
36  
37  
38  
39  
40  
41  
42  
43  
44  
45  
46  
47  
48  
49  
50  
51  
52  
53  
54  
55  
56  
57  
58  
59  
60

1  
2 6.23 Voelde u zich levenslustig?  Altijd  
3  Meestal  
4  Vaak  
5  Soms  
6  Zelden  
7  Nooit  
8  
9  
10

---

11 6.24 Was u erg zenuwachtig?  Altijd  
12  Meestal  
13  Vaak  
14  Soms  
15  Zelden  
16  Nooit  
17  
18  
19  
20

---

21 6.25 Zat u zo in de put dat u niets kon?  Altijd  
22  Meestal  
23  Vaak  
24  Soms  
25  Zelden  
26  Nooit  
27  
28  
29  
30

---

31 6.26 Voelde u zich rustig en tevreden?  Altijd  
32  Meestal  
33  Vaak  
34  Soms  
35  Zelden  
36  Nooit  
37  
38  
39  
40

---

41 6.27 Had u veel energie?  Altijd  
42  Meestal  
43  Vaak  
44  Soms  
45  Zelden  
46  Nooit  
47  
48  
49  
50

---

51 6.28 Voelde u zich somber en neerslachtig?  Altijd  
52  Meestal  
53  Vaak  
54  Soms  
55  Zelden  
56  Nooit  
57  
58  
59  
60

1  
2  
3  
4  
5  
6  
7  
8  
9  
10  
11  
12  
13  
14  
15  
16  
17  
18  
19  
20  
21  
22  
23  
24  
25  
26  
27  
28  
29  
30  
31  
32  
33  
34  
35  
36  
37  
38  
39  
40  
41  
42  
43  
44  
45  
46  
47  
48  
49  
50  
51  
52  
53  
54  
55  
56  
57  
58  
59  
60

---

|      |                         |                                                                                                                                                                                          |
|------|-------------------------|------------------------------------------------------------------------------------------------------------------------------------------------------------------------------------------|
| 6.29 | Voelde u zich uitgeput? | <input type="radio"/> Altijd<br><input type="radio"/> Meestal<br><input type="radio"/> Vaak<br><input type="radio"/> Soms<br><input type="radio"/> Zelden<br><input type="radio"/> Nooit |
|------|-------------------------|------------------------------------------------------------------------------------------------------------------------------------------------------------------------------------------|

---

|      |                          |                                                                                                                                                                                          |
|------|--------------------------|------------------------------------------------------------------------------------------------------------------------------------------------------------------------------------------|
| 6.30 | Was u een gelukkig mens? | <input type="radio"/> Altijd<br><input type="radio"/> Meestal<br><input type="radio"/> Vaak<br><input type="radio"/> Soms<br><input type="radio"/> Zelden<br><input type="radio"/> Nooit |
|------|--------------------------|------------------------------------------------------------------------------------------------------------------------------------------------------------------------------------------|

---

|      |                    |                                                                                                                                                                                          |
|------|--------------------|------------------------------------------------------------------------------------------------------------------------------------------------------------------------------------------|
| 6.31 | Voelde u zich moe? | <input type="radio"/> Altijd<br><input type="radio"/> Meestal<br><input type="radio"/> Vaak<br><input type="radio"/> Soms<br><input type="radio"/> Zelden<br><input type="radio"/> Nooit |
|------|--------------------|------------------------------------------------------------------------------------------------------------------------------------------------------------------------------------------|

---

|      |                                                                                                                                                                                      |                                                                                                                                                            |
|------|--------------------------------------------------------------------------------------------------------------------------------------------------------------------------------------|------------------------------------------------------------------------------------------------------------------------------------------------------------|
| 6.32 | Hoe vaak hebben uw lichamelijke gezondheid of emotionele problemen u gedurende de afgelopen 4 weken gehinderd bij uw sociale activiteiten (zoals vrienden of familie bezoeken etc.)? | <input type="radio"/> Altijd<br><input type="radio"/> Meestal<br><input type="radio"/> Soms<br><input type="radio"/> Zelden<br><input type="radio"/> Nooit |
|------|--------------------------------------------------------------------------------------------------------------------------------------------------------------------------------------|------------------------------------------------------------------------------------------------------------------------------------------------------------|

---

|      |                                                            |                                                                                                                                                                                                              |
|------|------------------------------------------------------------|--------------------------------------------------------------------------------------------------------------------------------------------------------------------------------------------------------------|
| 6.33 | Ik lijk wat gemakkelijker ziek te worden dan andere mensen | <input type="radio"/> Volkomen juist<br><input type="radio"/> Grotendeels juist<br><input type="radio"/> Weet ik niet<br><input type="radio"/> Grotendeels onjuist<br><input type="radio"/> Volkomen onjuist |
|------|------------------------------------------------------------|--------------------------------------------------------------------------------------------------------------------------------------------------------------------------------------------------------------|

---

|      |                                                 |                                                                                                                                                                                                              |
|------|-------------------------------------------------|--------------------------------------------------------------------------------------------------------------------------------------------------------------------------------------------------------------|
| 6.34 | Ik ben even gezond als andere mensen die ik ken | <input type="radio"/> Volkomen juist<br><input type="radio"/> Grotendeels juist<br><input type="radio"/> Weet ik niet<br><input type="radio"/> Grotendeels onjuist<br><input type="radio"/> Volkomen onjuist |
|------|-------------------------------------------------|--------------------------------------------------------------------------------------------------------------------------------------------------------------------------------------------------------------|

- 1  
2  
3  
4  
5  
6  
7  
8  
9
- 
- 6.35 Ik verwacht dat mijn gezondheid achteruit zal gaan
- Volkomen juist
  - Grotendeels juist
  - Weet ik niet
  - Grotendeels onjuist
  - Volkomen onjuist
- 

- 10  
11  
12  
13  
14  
15  
16  
17  
18  
19  
20  
21  
22
- 6.36 Mijn gezondheid is uitstekend
- Volkomen juist
  - Grotendeels juist
  - Weet ik niet
  - Grotendeels onjuist
  - Volkomen onjuist

## Vragenlijst PRIMA studie 52 weken - GAS

| Number | Question                                                                                                                                                                                  | Answers                                                                                                                                                                                                                                                                                                                                                              |
|--------|-------------------------------------------------------------------------------------------------------------------------------------------------------------------------------------------|----------------------------------------------------------------------------------------------------------------------------------------------------------------------------------------------------------------------------------------------------------------------------------------------------------------------------------------------------------------------|
|        | Tijdens de eerste afspraak werd een duidelijk doel met u afgesproken. Dit werd tevens per email naar u gestuurd. Hoe is de situatie nu ten aanzien van de destijds gestelde doelstelling? |                                                                                                                                                                                                                                                                                                                                                                      |
| 7.1    | Wat is nu de situatie ten aanzien van het tijdens de eerste afspraak afgesproken doelstelling (Goal attainment Scaling)?                                                                  | <ul style="list-style-type: none"> <li><input type="radio"/> Achteruitgang (minder dan de uitgangssituatie)</li> <li><input type="radio"/> Uitgangssituatie</li> <li><input type="radio"/> Minder dan het doel</li> <li><input type="radio"/> Doel</li> <li><input type="radio"/> Meer dan het doel</li> <li><input type="radio"/> Veel meer dan het doel</li> </ul> |

## Vragenlijst PRIMA studie 52 weken - EQ-5D-3L

| Number | Question                                                                                                                                                                                                                                                                                                                                                           | Answers                                                                                                                                                                                                                  |
|--------|--------------------------------------------------------------------------------------------------------------------------------------------------------------------------------------------------------------------------------------------------------------------------------------------------------------------------------------------------------------------|--------------------------------------------------------------------------------------------------------------------------------------------------------------------------------------------------------------------------|
|        | Deze vragenlijst gaat over uw standpunten t.a.v. uw gezondheid. Met behulp van deze gegevens kan worden bijgehouden hoe u zich voelt en hoe goed u in staat bent uw gebruikelijke bezigheden uit te voeren. Beantwoord elke vraag door een antwoord aan te klikken. Als u niet zeker weet hoe u een vraag moet beantwoorden, geef dan het best mogelijke antwoord. |                                                                                                                                                                                                                          |
| 8.1    | Hoe is het met uw Mobiliteit gesteld?                                                                                                                                                                                                                                                                                                                              | <ul style="list-style-type: none"> <li><input type="radio"/> Ik heb geen problemen met lopen</li> <li><input type="radio"/> Ik heb enige problemen met lopen</li> <li><input type="radio"/> Ik ben bedlegerig</li> </ul> |



|                                                                                                                                                                                                                                            |                                                                                                                  |                                                                                                                                                                                                                                                             |
|--------------------------------------------------------------------------------------------------------------------------------------------------------------------------------------------------------------------------------------------|------------------------------------------------------------------------------------------------------------------|-------------------------------------------------------------------------------------------------------------------------------------------------------------------------------------------------------------------------------------------------------------|
| 8.2                                                                                                                                                                                                                                        | Hoe is het met uw Zelfzorg gesteld?                                                                              | <input type="radio"/> Ik heb geen problemen om mijzelf te wassen of aan te kleden<br><input type="radio"/> Ik heb enige problemen om mijzelf te wassen of aan te kleden<br><input type="radio"/> Ik ben niet in staat om mijzelf te wassen of aan te kleden |
| 8.3                                                                                                                                                                                                                                        | Hoe is het met de Dagelijkse activiteiten (werk, studie, huishouden, gezins- en vrijetijdsactiviteiten) gesteld? | <input type="radio"/> Ik heb geen problemen met mijn dagelijkse activiteiten<br><input type="radio"/> Ik heb enige problemen met mijn dagelijkse activiteiten<br><input type="radio"/> Ik ben niet in staat om mijn dagelijkse activiteiten uit te voeren   |
| 8.4                                                                                                                                                                                                                                        | Hoe is het met de Pijn/klachten gesteld?                                                                         | <input type="radio"/> Ik heb geen pijn of andere klachten<br><input type="radio"/> Ik heb matige pijn of andere klachten<br><input type="radio"/> Ik heb zeer ernstige pijn of andere klachten                                                              |
| 8.5                                                                                                                                                                                                                                        | Hoe is het met de Stemming gesteld?                                                                              | <input type="radio"/> Ik ben niet angstig of somber<br><input type="radio"/> Ik ben matig angstig of somber<br><input type="radio"/> Ik ben erg angstig of somber                                                                                           |
| <p>We willen weten hoe goed of slecht uw gezondheid VANDAAG is. Deze meetschaal loopt van 0 tot 100: 100 staat voor de BESTE gezondheid die u zich kunt voorstellen - 0 staat voor de SLECHTSTE gezondheid die u zich kunt voorstellen</p> |                                                                                                                  |                                                                                                                                                                                                                                                             |
| 8.6                                                                                                                                                                                                                                        | Uw Gezondheid vandaag                                                                                            | (0.00) (100.00)                                                                                                                                                                                                                                             |

## Vragenlijst PRIMA studie 52 weken - AOS

| Number                                                                                                                                                                                                                                                                                                                                                                                                               | Question                                                   | Answers                                                                                            |
|----------------------------------------------------------------------------------------------------------------------------------------------------------------------------------------------------------------------------------------------------------------------------------------------------------------------------------------------------------------------------------------------------------------------|------------------------------------------------------------|----------------------------------------------------------------------------------------------------|
| <p>Instructies: De lijn naast elke vraag staat voor hoeveel PIJN u heeft in verschillende situaties. De linker kant (0) is "geen pijn" en de rechter kant (100) is "ergste pijn denkbaar". Geef voor de onderstaande situaties op de lijn aan hoeveel PIJN u in de afgelopen week in de enkel had. Als een of meerdere van deze situaties niet van toepassing waren, dan kiest u de "niet van toepassing" optie.</p> |                                                            |                                                                                                    |
| 9.1                                                                                                                                                                                                                                                                                                                                                                                                                  | Wat was de hoogte van de ergste pijn in de afgelopen week? | (0.00) (100.00)                                                                                    |
| 9.2                                                                                                                                                                                                                                                                                                                                                                                                                  | Heeft u pijn als u 's ochtends opstaat?                    | <input type="radio"/> Ja<br><input type="radio"/> Nee<br><input type="radio"/> Niet van toepassing |

|    |       |                                                                                                                     |                                           |
|----|-------|---------------------------------------------------------------------------------------------------------------------|-------------------------------------------|
| 1  |       |                                                                                                                     |                                           |
| 2  | 9.2.1 | <b><i>If 'Heeft u pijn als u 's ochtends opstaat?' is equal to 'Ja' answer this question:</i></b>                   | (0.00) (100.00)                           |
| 3  |       | Hoeveel pijn heeft u voordat u 's ochtends opstaat?                                                                 |                                           |
| 4  |       |                                                                                                                     |                                           |
| 5  |       |                                                                                                                     |                                           |
| 6  | 9.3   | Heeft u pijn wanneer u op blote voeten loopt?                                                                       | <input type="radio"/> Ja                  |
| 7  |       |                                                                                                                     | <input type="radio"/> Nee                 |
| 8  |       |                                                                                                                     | <input type="radio"/> Niet van toepassing |
| 9  |       |                                                                                                                     |                                           |
| 10 |       |                                                                                                                     |                                           |
| 11 |       |                                                                                                                     |                                           |
| 12 | 9.3.1 | <b><i>If 'Heeft u pijn wanneer u op blote voeten loopt?' is equal to 'Ja' answer this question:</i></b>             | (0.00) (100.00)                           |
| 13 |       | Hoeveel pijn heeft u als u op blote voeten loopt?                                                                   |                                           |
| 14 |       |                                                                                                                     |                                           |
| 15 |       |                                                                                                                     |                                           |
| 16 | 9.4   | Heeft u pijn wanneer u op blote voeten staat?                                                                       | <input type="radio"/> Ja                  |
| 17 |       |                                                                                                                     | <input type="radio"/> Nee                 |
| 18 |       |                                                                                                                     | <input type="radio"/> Niet van toepassing |
| 19 |       |                                                                                                                     |                                           |
| 20 |       |                                                                                                                     |                                           |
| 21 |       |                                                                                                                     |                                           |
| 22 | 9.4.1 | <b><i>If 'Heeft u pijn wanneer u op blote voeten staat?' is equal to 'Ja' answer this question:</i></b>             | (0.00) (100.00)                           |
| 23 |       | Hoeveel pijn heeft u als u op blote voeten staat?                                                                   |                                           |
| 24 |       |                                                                                                                     |                                           |
| 25 |       |                                                                                                                     |                                           |
| 26 | 9.5   | Heeft u pijn wanneer u met schoenen loopt?                                                                          | <input type="radio"/> Ja                  |
| 27 |       |                                                                                                                     | <input type="radio"/> Nee                 |
| 28 |       |                                                                                                                     | <input type="radio"/> Niet van toepassing |
| 29 |       |                                                                                                                     |                                           |
| 30 |       |                                                                                                                     |                                           |
| 31 |       |                                                                                                                     |                                           |
| 32 | 9.5.1 | <b><i>If 'Heeft u pijn wanneer u met schoenen loopt?' is equal to 'Ja' answer this question:</i></b>                | (0.00) (100.00)                           |
| 33 |       | Hoeveel pijn heeft u wanneer u met schoenen loopt?                                                                  |                                           |
| 34 |       |                                                                                                                     |                                           |
| 35 |       |                                                                                                                     |                                           |
| 36 | 9.6   | Heeft u pijn wanneer u met schoenen staat?                                                                          | <input type="radio"/> Ja                  |
| 37 |       |                                                                                                                     | <input type="radio"/> Nee                 |
| 38 |       |                                                                                                                     | <input type="radio"/> Niet van toepassing |
| 39 |       |                                                                                                                     |                                           |
| 40 |       |                                                                                                                     |                                           |
| 41 |       |                                                                                                                     |                                           |
| 42 | 9.6.1 | <b><i>If 'Heeft u pijn wanneer u met schoenen staat?' is equal to 'Ja' answer this question:</i></b>                | (0.00) (100.00)                           |
| 43 |       | Hoeveel pijn heeft u wanneer u met schoenen staat?                                                                  |                                           |
| 44 |       |                                                                                                                     |                                           |
| 45 |       |                                                                                                                     |                                           |
| 46 | 9.7   | Heeft u pijn wanneer u loopt met steunzolen of een brace?                                                           | <input type="radio"/> Ja                  |
| 47 |       |                                                                                                                     | <input type="radio"/> Nee                 |
| 48 |       |                                                                                                                     | <input type="radio"/> Niet van toepassing |
| 49 |       |                                                                                                                     |                                           |
| 50 |       |                                                                                                                     |                                           |
| 51 |       |                                                                                                                     |                                           |
| 52 | 9.7.1 | <b><i>If 'Heeft u pijn wanneer u loopt met steunzolen of een brace?' is equal to 'Ja' answer this question:</i></b> | (0.00) (100.00)                           |
| 53 |       | Hoeveel pijn heeft u wanneer u loopt met steunzolen of een brace?                                                   |                                           |
| 54 |       |                                                                                                                     |                                           |
| 55 |       |                                                                                                                     |                                           |
| 56 |       |                                                                                                                     |                                           |
| 57 |       |                                                                                                                     |                                           |
| 58 |       |                                                                                                                     |                                           |
| 59 |       |                                                                                                                     |                                           |
| 60 |       |                                                                                                                     |                                           |

|    |        |                                                                                                                                                                                                                                                                                                                                                                                                                                               |                                                                                                    |          |
|----|--------|-----------------------------------------------------------------------------------------------------------------------------------------------------------------------------------------------------------------------------------------------------------------------------------------------------------------------------------------------------------------------------------------------------------------------------------------------|----------------------------------------------------------------------------------------------------|----------|
| 1  |        |                                                                                                                                                                                                                                                                                                                                                                                                                                               |                                                                                                    |          |
| 2  | 9.8    | Heeft u pijn wanneer u staat met steunzolen of een brace?                                                                                                                                                                                                                                                                                                                                                                                     | <input type="radio"/> Ja<br><input type="radio"/> Nee<br><input type="radio"/> Niet van toepassing |          |
| 3  |        |                                                                                                                                                                                                                                                                                                                                                                                                                                               |                                                                                                    |          |
| 4  |        |                                                                                                                                                                                                                                                                                                                                                                                                                                               |                                                                                                    |          |
| 5  |        |                                                                                                                                                                                                                                                                                                                                                                                                                                               |                                                                                                    |          |
| 6  |        |                                                                                                                                                                                                                                                                                                                                                                                                                                               |                                                                                                    |          |
| 7  |        |                                                                                                                                                                                                                                                                                                                                                                                                                                               |                                                                                                    |          |
| 8  | 9.8.1  | <b>If 'Heeft u pijn wanneer u staat met steunzolen of een brace?' is equal to 'Ja' answer this question:</b>                                                                                                                                                                                                                                                                                                                                  | (0.00)                                                                                             | (100.00) |
| 9  |        | Hoeveel pijn heeft u wanneer u staat met steunzolen of een brace?                                                                                                                                                                                                                                                                                                                                                                             |                                                                                                    |          |
| 10 |        |                                                                                                                                                                                                                                                                                                                                                                                                                                               |                                                                                                    |          |
| 11 |        |                                                                                                                                                                                                                                                                                                                                                                                                                                               |                                                                                                    |          |
| 12 |        |                                                                                                                                                                                                                                                                                                                                                                                                                                               |                                                                                                    |          |
| 13 | 9.9    | Heeft u pijn aan het einde van de dag?                                                                                                                                                                                                                                                                                                                                                                                                        | <input type="radio"/> Ja<br><input type="radio"/> Nee<br><input type="radio"/> Niet van toepassing |          |
| 14 |        |                                                                                                                                                                                                                                                                                                                                                                                                                                               |                                                                                                    |          |
| 15 |        |                                                                                                                                                                                                                                                                                                                                                                                                                                               |                                                                                                    |          |
| 16 |        |                                                                                                                                                                                                                                                                                                                                                                                                                                               |                                                                                                    |          |
| 17 |        |                                                                                                                                                                                                                                                                                                                                                                                                                                               |                                                                                                    |          |
| 18 |        |                                                                                                                                                                                                                                                                                                                                                                                                                                               |                                                                                                    |          |
| 19 | 9.9.1  | <b>If 'Heeft u pijn aan het einde van de dag?' is equal to 'Ja' answer this question:</b>                                                                                                                                                                                                                                                                                                                                                     | (0.00)                                                                                             | (100.00) |
| 20 |        | Hoeveel pijn heeft u aan het einde van de dag?                                                                                                                                                                                                                                                                                                                                                                                                |                                                                                                    |          |
| 21 |        |                                                                                                                                                                                                                                                                                                                                                                                                                                               |                                                                                                    |          |
| 22 |        |                                                                                                                                                                                                                                                                                                                                                                                                                                               |                                                                                                    |          |
| 23 |        | Instructies:De lijn naast elke vraag staat voor hoeveel MOEITE u heeft met verschillende activiteiten. De linker kant (0) is "Niet moeilijk" en de rechter kant (100) is "Te moeilijk, niet uitvoerbaar". Geef voor de onderstaande activiteiten op de lijn aan hoeveel MOEITE u in de afgelopen week door enkelklachten had met onderstaande activiteiten. Als een situatie niet van toepassing is, kies dan de optie "niet van toepassing". |                                                                                                    |          |
| 24 |        |                                                                                                                                                                                                                                                                                                                                                                                                                                               |                                                                                                    |          |
| 25 |        |                                                                                                                                                                                                                                                                                                                                                                                                                                               |                                                                                                    |          |
| 26 |        |                                                                                                                                                                                                                                                                                                                                                                                                                                               |                                                                                                    |          |
| 27 |        |                                                                                                                                                                                                                                                                                                                                                                                                                                               |                                                                                                    |          |
| 28 |        |                                                                                                                                                                                                                                                                                                                                                                                                                                               |                                                                                                    |          |
| 29 |        |                                                                                                                                                                                                                                                                                                                                                                                                                                               |                                                                                                    |          |
| 30 | 9.10   | Heeft u moeite met door het huis lopen?                                                                                                                                                                                                                                                                                                                                                                                                       | <input type="radio"/> Ja<br><input type="radio"/> Nee<br><input type="radio"/> Niet van toepassing |          |
| 31 |        |                                                                                                                                                                                                                                                                                                                                                                                                                                               |                                                                                                    |          |
| 32 |        |                                                                                                                                                                                                                                                                                                                                                                                                                                               |                                                                                                    |          |
| 33 |        |                                                                                                                                                                                                                                                                                                                                                                                                                                               |                                                                                                    |          |
| 34 |        |                                                                                                                                                                                                                                                                                                                                                                                                                                               |                                                                                                    |          |
| 35 | 9.10.1 | <b>If 'Heeft u moeite met door het huis lopen?' is equal to 'Ja' answer this question:</b>                                                                                                                                                                                                                                                                                                                                                    | (0.00)                                                                                             | (100.00) |
| 36 |        | Hoeveel moeite heeft u met door het huis lopen?                                                                                                                                                                                                                                                                                                                                                                                               |                                                                                                    |          |
| 37 |        |                                                                                                                                                                                                                                                                                                                                                                                                                                               |                                                                                                    |          |
| 38 |        |                                                                                                                                                                                                                                                                                                                                                                                                                                               |                                                                                                    |          |
| 39 |        |                                                                                                                                                                                                                                                                                                                                                                                                                                               |                                                                                                    |          |
| 40 | 9.11   | Heeft u moeite met buiten lopen op oneven ondergrond?                                                                                                                                                                                                                                                                                                                                                                                         | <input type="radio"/> Ja<br><input type="radio"/> Nee<br><input type="radio"/> Niet van toepassing |          |
| 41 |        |                                                                                                                                                                                                                                                                                                                                                                                                                                               |                                                                                                    |          |
| 42 |        |                                                                                                                                                                                                                                                                                                                                                                                                                                               |                                                                                                    |          |
| 43 |        |                                                                                                                                                                                                                                                                                                                                                                                                                                               |                                                                                                    |          |
| 44 |        |                                                                                                                                                                                                                                                                                                                                                                                                                                               |                                                                                                    |          |
| 45 | 9.11.1 | <b>If 'Heeft u moeite met buiten lopen op oneven ondergrond?' is equal to 'Ja' answer this question:</b>                                                                                                                                                                                                                                                                                                                                      | (0.00)                                                                                             | (100.00) |
| 46 |        | Hoeveel moeite heeft u met buiten lopen op oneven ondergrond?                                                                                                                                                                                                                                                                                                                                                                                 |                                                                                                    |          |
| 47 |        |                                                                                                                                                                                                                                                                                                                                                                                                                                               |                                                                                                    |          |
| 48 |        |                                                                                                                                                                                                                                                                                                                                                                                                                                               |                                                                                                    |          |
| 49 |        |                                                                                                                                                                                                                                                                                                                                                                                                                                               |                                                                                                    |          |
| 50 |        |                                                                                                                                                                                                                                                                                                                                                                                                                                               |                                                                                                    |          |
| 51 | 9.12   | Heeft u moeite met een paar honderd meter lopen?                                                                                                                                                                                                                                                                                                                                                                                              | <input type="radio"/> Ja<br><input type="radio"/> Nee<br><input type="radio"/> Niet van toepassing |          |
| 52 |        |                                                                                                                                                                                                                                                                                                                                                                                                                                               |                                                                                                    |          |
| 53 |        |                                                                                                                                                                                                                                                                                                                                                                                                                                               |                                                                                                    |          |
| 54 |        |                                                                                                                                                                                                                                                                                                                                                                                                                                               |                                                                                                    |          |
| 55 |        |                                                                                                                                                                                                                                                                                                                                                                                                                                               |                                                                                                    |          |
| 56 | 9.12.1 | <b>If 'Heeft u moeite met een paar honderd meter lopen?' is equal to 'Ja' answer this question:</b>                                                                                                                                                                                                                                                                                                                                           | (0.00)                                                                                             | (100.00) |
| 57 |        | Hoeveel moeite heeft u met een paar honderd meter lopen?                                                                                                                                                                                                                                                                                                                                                                                      |                                                                                                    |          |
| 58 |        |                                                                                                                                                                                                                                                                                                                                                                                                                                               |                                                                                                    |          |
| 59 |        |                                                                                                                                                                                                                                                                                                                                                                                                                                               |                                                                                                    |          |
| 60 |        |                                                                                                                                                                                                                                                                                                                                                                                                                                               |                                                                                                    |          |

|    |        |                                                                                                             |                                           |          |
|----|--------|-------------------------------------------------------------------------------------------------------------|-------------------------------------------|----------|
| 1  |        |                                                                                                             |                                           |          |
| 2  | 9.13   | Heeft u moeite met een trap oplopen?                                                                        | <input type="radio"/> Ja                  |          |
| 3  |        |                                                                                                             | <input type="radio"/> Nee                 |          |
| 4  |        |                                                                                                             | <input type="radio"/> Niet van toepassing |          |
| 5  |        |                                                                                                             |                                           |          |
| 6  |        |                                                                                                             |                                           |          |
| 7  |        |                                                                                                             |                                           |          |
| 8  | 9.13.1 | <b>If 'Heeft u moeite met een trap oplopen?' is equal to 'Ja' answer this question:</b>                     | (0.00)                                    | (100.00) |
| 9  |        | Hoeveel moeite heeft u met een trap oplopen?                                                                |                                           |          |
| 10 |        |                                                                                                             |                                           |          |
| 11 |        |                                                                                                             |                                           |          |
| 12 | 9.14   | Heeft u moeite met een trap aflopen?                                                                        | <input type="radio"/> Ja                  |          |
| 13 |        |                                                                                                             | <input type="radio"/> Nee                 |          |
| 14 |        |                                                                                                             | <input type="radio"/> Niet van toepassing |          |
| 15 |        |                                                                                                             |                                           |          |
| 16 |        |                                                                                                             |                                           |          |
| 17 |        |                                                                                                             |                                           |          |
| 18 | 9.14.1 | <b>If 'Heeft u moeite met een trap aflopen?' is equal to 'Ja' answer this question:</b>                     | (0.00)                                    | (100.00) |
| 19 |        | Hoeveel moeite heeft u met een trap aflopen?                                                                |                                           |          |
| 20 |        |                                                                                                             |                                           |          |
| 21 |        |                                                                                                             |                                           |          |
| 22 | 9.15   | Heeft u moeite met op de tenen staan?                                                                       | <input type="radio"/> Ja                  |          |
| 23 |        |                                                                                                             | <input type="radio"/> Nee                 |          |
| 24 |        |                                                                                                             | <input type="radio"/> Niet van toepassing |          |
| 25 |        |                                                                                                             |                                           |          |
| 26 |        |                                                                                                             |                                           |          |
| 27 |        |                                                                                                             |                                           |          |
| 28 | 9.15.1 | <b>If 'Heeft u moeite met op de tenen staan?' is equal to 'Ja' answer this question:</b>                    | (0.00)                                    | (100.00) |
| 29 |        | Hoeveel moeite heeft u met op de tenen staan?                                                               |                                           |          |
| 30 |        |                                                                                                             |                                           |          |
| 31 |        |                                                                                                             |                                           |          |
| 32 | 9.16   | Heeft u moeite met opstaan uit de stoel?                                                                    | <input type="radio"/> Ja                  |          |
| 33 |        |                                                                                                             | <input type="radio"/> Nee                 |          |
| 34 |        |                                                                                                             | <input type="radio"/> Niet van toepassing |          |
| 35 |        |                                                                                                             |                                           |          |
| 36 |        |                                                                                                             |                                           |          |
| 37 |        |                                                                                                             |                                           |          |
| 38 | 9.16.1 | <b>If 'Heeft u moeite met opstaan uit de stoel?' is equal to 'Ja' answer this question:</b>                 | (0.00)                                    | (100.00) |
| 39 |        | Hoeveel moeite heeft u met opstaan uit de stoel?                                                            |                                           |          |
| 40 |        |                                                                                                             |                                           |          |
| 41 |        |                                                                                                             |                                           |          |
| 42 | 9.17   | Heeft u moeite met het op- of afstappen van stoepranden?                                                    | <input type="radio"/> Ja                  |          |
| 43 |        |                                                                                                             | <input type="radio"/> Nee                 |          |
| 44 |        |                                                                                                             | <input type="radio"/> Niet van toepassing |          |
| 45 |        |                                                                                                             |                                           |          |
| 46 |        |                                                                                                             |                                           |          |
| 47 |        |                                                                                                             |                                           |          |
| 48 | 9.17.1 | <b>If 'Heeft u moeite met het op- of afstappen van stoepranden?' is equal to 'Ja' answer this question:</b> | (0.00)                                    | (100.00) |
| 49 |        | Hoeveel moeite heeft u met het op- of afstappen van stoepranden?                                            |                                           |          |
| 50 |        |                                                                                                             |                                           |          |
| 51 |        |                                                                                                             |                                           |          |
| 52 |        |                                                                                                             |                                           |          |
| 53 |        |                                                                                                             |                                           |          |
| 54 | 9.18   | Heeft u moeite met snel lopen of rennen?                                                                    | <input type="radio"/> Ja                  |          |
| 55 |        |                                                                                                             | <input type="radio"/> Nee                 |          |
| 56 |        |                                                                                                             | <input type="radio"/> Niet van toepassing |          |
| 57 |        |                                                                                                             |                                           |          |
| 58 |        |                                                                                                             |                                           |          |
| 59 |        |                                                                                                             |                                           |          |
| 60 |        |                                                                                                             |                                           |          |

9.18.1 ***If 'Heeft u moeite met snel lopen of rennen?' is equal to 'Ja' answer this question:*** (0.00) (100.00)  
 Hoeveel moeite heeft u met snel lopen of rennen?

## Vragenlijst PRIMA studie 52 weken - FAOS

| Number | Question                                                                                                                                                                                                                                                                                                                                                                                                                                                                                                                                                                            | Answers                                                                                                                                                    |
|--------|-------------------------------------------------------------------------------------------------------------------------------------------------------------------------------------------------------------------------------------------------------------------------------------------------------------------------------------------------------------------------------------------------------------------------------------------------------------------------------------------------------------------------------------------------------------------------------------|------------------------------------------------------------------------------------------------------------------------------------------------------------|
|        | Deze lijst vraagt naar uw mening over uw voet/enkel. Uw antwoorden geven ons een beeld van uw voet/enkel klachten en hoe u in staat bent om alledaagse activiteiten uit te voeren in uw huidige situatie. Beantwoorden van een vraag doet u door het aanklikken van een vakje met het volgens u meest juiste antwoord (één vakje per vraag). Als u niet zeker weet hoe u een vraag moet beantwoorden, geeft u dan het antwoord dat volgens u het meest op uw situatie van toepassing is. Deze vraag heeft betrekking op het voorkomen van voet/enkel klachten in de afgelopen week. |                                                                                                                                                            |
| 10.1   | Is uw voet/enkel gezwollen?                                                                                                                                                                                                                                                                                                                                                                                                                                                                                                                                                         | <input type="radio"/> Nooit <input type="radio"/> Zelden <input type="radio"/> Soms <input type="radio"/> Vaak <input type="radio"/> Altijd                |
| 10.2   | Voelt u gekraak of hoort u klikken of een ander vreemd geluid wanneer u de voet/enkel beweegt?                                                                                                                                                                                                                                                                                                                                                                                                                                                                                      | <input type="radio"/> Nooit <input type="radio"/> Zelden <input type="radio"/> Soms <input type="radio"/> Vaak <input type="radio"/> Altijd                |
| 10.3   | Hapert uw enkel of blokkeert uw enkel ('op slot' gaan zitten) wanneer u deze beweegt?                                                                                                                                                                                                                                                                                                                                                                                                                                                                                               | <input type="radio"/> Nooit <input type="radio"/> Zelden <input type="radio"/> Soms <input type="radio"/> Vaak <input type="radio"/> Altijd                |
| 10.4   | Kunt u de voet/enkel volledig strekken?                                                                                                                                                                                                                                                                                                                                                                                                                                                                                                                                             | <input type="radio"/> Altijd <input type="radio"/> Vaak <input type="radio"/> Soms <input type="radio"/> Zelden <input type="radio"/> Nooit                |
| 10.5   | Kunt u de voet volledig naar u toe buigen?                                                                                                                                                                                                                                                                                                                                                                                                                                                                                                                                          | <input type="radio"/> Altijd <input type="radio"/> Vaak <input type="radio"/> Soms <input type="radio"/> Zelden <input type="radio"/> Nooit                |
| 10.6   | In welke mate heeft u een stijf gevoel in de voet/enkel 's ochtends bij het wakker worden?                                                                                                                                                                                                                                                                                                                                                                                                                                                                                          | <input type="radio"/> Niet Ernstig <input type="radio"/> Mild <input type="radio"/> Matig <input type="radio"/> Zeer ernstig                               |
| 10.7   | In welke mate heeft u een stijf gevoel in de voet/enkel na zitten, liggen of rusten later op de dag?                                                                                                                                                                                                                                                                                                                                                                                                                                                                                | <input type="radio"/> Niet Ernstig <input type="radio"/> Mild <input type="radio"/> Matig <input type="radio"/> Zeer ernstig                               |
| 10.8   | Hoe vaak heeft u pijn in uw voet/enkel?                                                                                                                                                                                                                                                                                                                                                                                                                                                                                                                                             | <input type="radio"/> Nooit <input type="radio"/> Maandelijks <input type="radio"/> Wekelijks <input type="radio"/> Dagelijks <input type="radio"/> Altijd |

1  
2  
3  
4  
5  
6  
7  
8  
9

---

10.9 Hoeveel voet/enkel pijn heeft u gehad in de afgelopen week bij draaien als uw voet/enkel op de grond staat?

Geen  
 Mild  
 Matig  
 Ernstig  
 Zeer ernstig

---

10  
11  
12  
13  
14  
15  
16  
17  
18

---

10.10 Hoeveel voet/enkel pijn heeft u gehad in de afgelopen week bij het volledig uitstrekken van de voet/enkel?

Geen  
 Mild  
 Matig  
 Ernstig  
 Zeer ernstig

---

19  
20  
21  
22  
23  
24  
25  
26

---

10.11 Hoeveel voet/enkel pijn heeft u gehad in de afgelopen week bij het volledig naar u toe buigen/optrekken van de voet/enkel

Geen  
 Mild  
 Matig  
 Ernstig  
 Zeer ernstig

---

27  
28  
29  
30  
31  
32  
33  
34

---

10.12 Hoeveel voet/enkel pijn heeft u gehad in de afgelopen week bij het lopen op een vlakke ondergrond

Geen  
 Mild  
 Matig  
 Ernstig  
 Zeer ernstig

---

35  
36  
37  
38  
39  
40  
41  
42  
43

---

10.13 Hoeveel voet/enkel pijn heeft u gehad in de afgelopen week bij het trap op- en trap af lopen?

Geen  
 Mild  
 Matig  
 Ernstig  
 Zeer ernstig

---

44  
45  
46  
47  
48  
49  
50  
51

---

10.14 Hoeveel voet/enkel pijn heeft u gehad in de afgelopen week 's nachts in bed?

Geen  
 Mild  
 Matig  
 Ernstig  
 Zeer ernstig

---

52  
53  
54  
55  
56  
57  
58  
59  
60

---

10.15 Hoeveel voet/enkel pijn heeft u gehad in de afgelopen week bij het zitten of liggen?

Geen  
 Mild  
 Matig  
 Ernstig  
 Zeer ernstig

---

|    |       |                                                                                                                        |                                    |                                    |
|----|-------|------------------------------------------------------------------------------------------------------------------------|------------------------------------|------------------------------------|
| 1  |       |                                                                                                                        |                                    |                                    |
| 2  | 10.16 | Hoeveel voet/enkel pijn heeft u gehad in de afgelopen week bij het rechtop staan?                                      | <input type="radio"/> Geen         |                                    |
| 3  |       |                                                                                                                        | <input type="radio"/> Mild         |                                    |
| 4  |       |                                                                                                                        | <input type="radio"/> Matig        |                                    |
| 5  |       |                                                                                                                        | <input type="radio"/> Ernstig      |                                    |
| 6  |       |                                                                                                                        | <input type="radio"/> Zeer ernstig |                                    |
| 7  |       |                                                                                                                        |                                    |                                    |
| 8  |       |                                                                                                                        |                                    |                                    |
| 9  |       |                                                                                                                        |                                    |                                    |
| 10 | 10.17 | In welke mate werd u gehinderd bij het trap aflopen?                                                                   | <input type="radio"/> Niet         | <input type="radio"/> Mild         |
| 11 |       |                                                                                                                        | <input type="radio"/> Matig        | <input type="radio"/>              |
| 12 |       |                                                                                                                        | Ernstig                            | <input type="radio"/> Zeer ernstig |
| 13 |       |                                                                                                                        |                                    |                                    |
| 14 |       |                                                                                                                        |                                    |                                    |
| 15 | 10.18 | In welke mate werd u gehinderd bij het trap op lopen?                                                                  | <input type="radio"/> Niet         | <input type="radio"/> Mild         |
| 16 |       |                                                                                                                        | <input type="radio"/> Matig        | <input type="radio"/>              |
| 17 |       |                                                                                                                        | Ernstig                            | <input type="radio"/> Zeer ernstig |
| 18 |       |                                                                                                                        |                                    |                                    |
| 19 | 10.19 | In welke mate werd u gehinderd als u vanuit een zittende positie ging staan?                                           | <input type="radio"/> Niet         | <input type="radio"/> Mild         |
| 20 |       |                                                                                                                        | <input type="radio"/> Matig        | <input type="radio"/>              |
| 21 |       |                                                                                                                        | Ernstig                            | <input type="radio"/> Zeer ernstig |
| 22 |       |                                                                                                                        |                                    |                                    |
| 23 |       |                                                                                                                        |                                    |                                    |
| 24 | 10.20 | In welke mate werd u gehinderd bij het staan?                                                                          | <input type="radio"/> Niet         | <input type="radio"/> Mild         |
| 25 |       |                                                                                                                        | <input type="radio"/> Matig        | <input type="radio"/>              |
| 26 |       |                                                                                                                        | Ernstig                            | <input type="radio"/> Zeer ernstig |
| 27 |       |                                                                                                                        |                                    |                                    |
| 28 | 10.21 | In welke mate werd u gehinderd bij het naar de grond buigen/iets oprapen?                                              | <input type="radio"/> Niet         | <input type="radio"/> Mild         |
| 29 |       |                                                                                                                        | <input type="radio"/> Matig        | <input type="radio"/>              |
| 30 |       |                                                                                                                        | Ernstig                            | <input type="radio"/> Zeer ernstig |
| 31 |       |                                                                                                                        |                                    |                                    |
| 32 | 10.22 | In welke mate werd u gehinderd bij het lopen op een vlakke ondergrond?                                                 | <input type="radio"/> Niet         | <input type="radio"/> Mild         |
| 33 |       |                                                                                                                        | <input type="radio"/> Matig        | <input type="radio"/>              |
| 34 |       |                                                                                                                        | Ernstig                            | <input type="radio"/> Zeer ernstig |
| 35 |       |                                                                                                                        |                                    |                                    |
| 36 |       |                                                                                                                        |                                    |                                    |
| 37 | 10.23 | In welke mate werd u gehinderd bij het in- en uit de auto stappen?                                                     | <input type="radio"/> Niet         | <input type="radio"/> Mild         |
| 38 |       |                                                                                                                        | <input type="radio"/> Matig        | <input type="radio"/>              |
| 39 |       |                                                                                                                        | Ernstig                            | <input type="radio"/> Zeer ernstig |
| 40 |       |                                                                                                                        |                                    |                                    |
| 41 | 10.24 | In welke mate werd u gehinderd bij het boodschappen doen?                                                              | <input type="radio"/> Niet         | <input type="radio"/> Mild         |
| 42 |       |                                                                                                                        | <input type="radio"/> Matig        | <input type="radio"/>              |
| 43 |       |                                                                                                                        | Ernstig                            | <input type="radio"/> Zeer ernstig |
| 44 |       |                                                                                                                        |                                    |                                    |
| 45 | 10.25 | In welke mate werd u gehinderd bij sokken/panty's aantrekken?                                                          | <input type="radio"/> Niet         | <input type="radio"/> Mild         |
| 46 |       |                                                                                                                        | <input type="radio"/> Matig        | <input type="radio"/>              |
| 47 |       |                                                                                                                        | Ernstig                            | <input type="radio"/> Zeer ernstig |
| 48 |       |                                                                                                                        |                                    |                                    |
| 49 |       |                                                                                                                        |                                    |                                    |
| 50 | 10.26 | In welke mate werd u gehinderd bij het opstaan uit bed?                                                                | <input type="radio"/> Niet         | <input type="radio"/> Mild         |
| 51 |       |                                                                                                                        | <input type="radio"/> Matig        | <input type="radio"/>              |
| 52 |       |                                                                                                                        | Ernstig                            | <input type="radio"/> Zeer ernstig |
| 53 |       |                                                                                                                        |                                    |                                    |
| 54 | 10.27 | In welke mate werd u gehinderd bij het sokken uittrekken?                                                              | <input type="radio"/> Niet         | <input type="radio"/> Mild         |
| 55 |       |                                                                                                                        | <input type="radio"/> Matig        | <input type="radio"/>              |
| 56 |       |                                                                                                                        | Ernstig                            | <input type="radio"/> Zeer ernstig |
| 57 |       |                                                                                                                        |                                    |                                    |
| 58 |       |                                                                                                                        |                                    |                                    |
| 59 | 10.28 | In welke mate werd u gehinderd bij het in bed liggen (omdraaien, lange tijd uw voet/enkel in dezelfde positie houden)? | <input type="radio"/> Niet         | <input type="radio"/> Mild         |
| 60 |       |                                                                                                                        | <input type="radio"/> Matig        | <input type="radio"/>              |
|    |       |                                                                                                                        | Ernstig                            | <input type="radio"/> Zeer ernstig |

|       |                                                                                                                  |                                                                                                                                                                    |                                                                      |                             |                              |
|-------|------------------------------------------------------------------------------------------------------------------|--------------------------------------------------------------------------------------------------------------------------------------------------------------------|----------------------------------------------------------------------|-----------------------------|------------------------------|
| 10.29 | In welke mate werd u gehinderd bij het in/uit bad stappen?                                                       | <input type="radio"/> Niet<br>Ernstig                                                                                                                              | <input type="radio"/> Mild<br><input type="radio"/> Zeer ernstig     | <input type="radio"/> Matig | <input type="radio"/>        |
| 10.30 | In welke mate werd u gehinderd bij zitten?                                                                       | <input type="radio"/> Niet<br>Ernstig                                                                                                                              | <input type="radio"/> Mild<br><input type="radio"/> Zeer ernstig     | <input type="radio"/> Matig | <input type="radio"/>        |
| 10.31 | In welke mate werd u gehinderd bij het toilet op en af gaan?                                                     | <input type="radio"/> Niet<br>Ernstig                                                                                                                              | <input type="radio"/> Mild<br><input type="radio"/> Zeer ernstig     | <input type="radio"/> Matig | <input type="radio"/>        |
| 10.32 | In welke mate werd u gehinderd bij zwaar huishoudelijk werk (bijvoorbeeld zware dozen sjouwen, vloer schrobben)? | <input type="radio"/> Niet<br>Ernstig                                                                                                                              | <input type="radio"/> Mild<br><input type="radio"/> Zeer ernstig     | <input type="radio"/> Matig | <input type="radio"/>        |
| 10.33 | In welke mate werd u gehinderd bij licht huishoudelijk werk (bijvoorbeeld koken, afstoffen)?                     | <input type="radio"/> Niet<br>Ernstig                                                                                                                              | <input type="radio"/> Mild<br><input type="radio"/> Zeer ernstig     | <input type="radio"/> Matig | <input type="radio"/>        |
| 10.34 | In welke mate werd u gehinderd bij hurken?                                                                       | <input type="radio"/> Niet<br>Ernstig                                                                                                                              | <input type="radio"/> Mild<br><input type="radio"/> Zeer ernstig     | <input type="radio"/> Matig | <input type="radio"/>        |
| 10.35 | In welke mate werd u gehinderd bij hardlopen?                                                                    | <input type="radio"/> Niet<br>Ernstig                                                                                                                              | <input type="radio"/> Mild<br><input type="radio"/> Zeer ernstig     | <input type="radio"/> Matig | <input type="radio"/>        |
| 10.36 | In welke mate werd u gehinderd bij springen?                                                                     | <input type="radio"/> Niet<br>Ernstig                                                                                                                              | <input type="radio"/> Mild<br><input type="radio"/> Zeer ernstig     | <input type="radio"/> Matig | <input type="radio"/>        |
| 10.37 | In welke mate werd u gehinderd bij ronddraaien op uw aangedane voet/enkel?                                       | <input type="radio"/> Niet<br>Ernstig                                                                                                                              | <input type="radio"/> Mild<br><input type="radio"/> Zeer ernstig     | <input type="radio"/> Matig | <input type="radio"/>        |
| 10.38 | In welke mate werd u gehinderd bij knielen?                                                                      | <input type="radio"/> Niet<br>Ernstig                                                                                                                              | <input type="radio"/> Mild<br><input type="radio"/> Zeer ernstig     | <input type="radio"/> Matig | <input type="radio"/>        |
| 10.39 | Hoe vaak bent u zich bewust van uw voet/enkel probleem?                                                          | <input type="radio"/> Nooit<br>Wekelijks                                                                                                                           | <input type="radio"/> Maandelijks<br><input type="radio"/> Dagelijks | <input type="radio"/>       | <input type="radio"/> Altijd |
| 10.40 | Heeft u uw leven veranderd om activiteiten te vermijden die schadelijk kunnen zijn voor uw voet/enkel?           | <input type="radio"/> Niet<br><input type="radio"/> Enigszins<br><input type="radio"/> Matig<br><input type="radio"/> Behoorlijk<br><input type="radio"/> Volledig |                                                                      |                             |                              |



- 1  
2  
3  
4  
5  
6  
7  
8  
9
- 10.41 In hoeverre kunt u op uw voet/enkel vertrouwen?
- Volledig  
 Behoorlijk  
 Matig  
 Enigzins  
 Niet
- 
- 10.42 In het algemeen, in welke mate ondervindt u hinder van uw voet/enkel
- Geen  
 Mild  
 Matig  
 Ernstig  
 Zeer ernstig

## Vragenlijst PRIMA studie 52 weken - PRODISQ - Gezondheid en werk

| Number | Question                                                                                                                                                                                                                                                                    | Answers                                                                                                                                                                                                                                                                                                                                                                                                                                                                                                                                                                |
|--------|-----------------------------------------------------------------------------------------------------------------------------------------------------------------------------------------------------------------------------------------------------------------------------|------------------------------------------------------------------------------------------------------------------------------------------------------------------------------------------------------------------------------------------------------------------------------------------------------------------------------------------------------------------------------------------------------------------------------------------------------------------------------------------------------------------------------------------------------------------------|
| 11.1   | Wat is uw leeftijd?                                                                                                                                                                                                                                                         | <input type="text"/> jaar                                                                                                                                                                                                                                                                                                                                                                                                                                                                                                                                              |
| 11.2   | Wat is uw geslacht?                                                                                                                                                                                                                                                         | <input type="radio"/> Man<br><input type="radio"/> Vrouw                                                                                                                                                                                                                                                                                                                                                                                                                                                                                                               |
| 11.3   | Wat is de hoogste opleiding die u heeft afgemaakt (Zoek uw hoogste opleiding en kruis het hokje daarvoor aan)?                                                                                                                                                              | <input type="checkbox"/> Ik heb geen school of opleiding afgemaakt<br><input type="checkbox"/> Lagere school of basisschool<br><input type="checkbox"/> Huishoudschool, vbo, lbo, lts, leao of lhno<br><input type="checkbox"/> Mavo, mulo, ivo of vmbo<br><input type="checkbox"/> Mbo, mts, meao, mhno, inas of intas<br><input type="checkbox"/> Havo, vwo, hbs, mms, atheneum of gymnasium<br><input type="checkbox"/> Hbo, hts, heao of hhno<br><input type="checkbox"/> Universiteit<br><input type="checkbox"/> Ik heb een andere opleiding afgemaakt, namelijk |
| 11.3.1 | <b><i>If 'Wat is de hoogste opleiding die u heeft afgemaakt (Zoek uw hoogste opleiding en kruis het hokje daarvoor aan)?' is equal to 'Ik heb een andere opleiding afgemaakt, namelijk' answer this question:</i></b><br>Wat is de hoogste opleiding die u heeft afgemaakt? | <input type="text"/>                                                                                                                                                                                                                                                                                                                                                                                                                                                                                                                                                   |

- 1  
2  
3  
4  
5  
6  
7  
8  
9  
10  
11  
12  
13
- 11.4 Wat doet u in het dagelijks leven?
- Ik zit op school, ik studeer
- Ik werk in loondienst
- Ik ben zelfstandig ondernemer
- Ik ben huisvrouw, huisman
- Ik ben werkloos
- Ik ben arbeidsongeschikt
- Ik ben met pensioen of prepensioen
- Ik doe iets anders, namelijk

14  
15  
16  
17

11.4.1 ***If 'Wat doet u in het dagelijks leven?' is equal to 'Ik ben arbeidsongeschikt' answer this question:***

Wat doet u in het dagelijks leven?

18  
19  
20  
21  
22  
23

11.4.2 ***If 'Wat doet u in het dagelijks leven?' is equal to 'Ik doe iets anders, namelijk' answer this question:***

Wat doet u in het dagelijks leven?

24  
25  
26  
27  
28

11.5 Hebt u betaald werk?

Nee

Ja

29  
30  
31  
32

11.5.1 ***If 'Hebt u betaald werk?' is equal to 'Ja' answer this question:***

Wat is uw beroep?

33  
34  
35  
36  
37

11.5.2 ***If 'Hebt u betaald werk?' is equal to 'Ja' answer this question:***

Hoeveel uur per week werkt u (Tel alleen de uren waarvoor u betaald wordt)?

 uren

38  
39  
40  
41  
42

11.5.3 ***If 'Hebt u betaald werk?' is equal to 'Ja' answer this question:***

Hoeveel dagen in de week werkt u?

 Dagen

43  
44  
45  
46  
47

11.5.4 ***If 'Hebt u betaald werk?' is equal to 'Ja' answer this question:***

Bent u in de afgelopen 4 weken afwezig geweest van uw werk omdat u ziek was?

Nee

Ja

48  
49  
50  
51  
52  
53  
54

11.5.4.1 ***If 'Bent u in de afgelopen 4 weken afwezig geweest van uw werk omdat u ziek was?' is equal to 'Ja' answer this question:***

Bent u in de afgelopen 4 weken afwezig geweest van uw werk omdat u ziek was (Tel alleen de werkdagen in de afgelopen 4 weken)?

 dagen afwezig geweest

55  
56  
57  
58  
59  
60

11.5.4.2 ***If 'Bent u in de afgelopen 4 weken afwezig geweest van uw werk omdat u ziek was?' is equal to 'Ja' answer this question:***

Was u langer dan de gehele periode van 4 weken afwezig van uw werk doordat u ziek was?

Nee

Ja

|            |                                                                                                                                                                                                                                                                                                                                                                                                                 |                                                                             |                                            |
|------------|-----------------------------------------------------------------------------------------------------------------------------------------------------------------------------------------------------------------------------------------------------------------------------------------------------------------------------------------------------------------------------------------------------------------|-----------------------------------------------------------------------------|--------------------------------------------|
| 11.5.4.2.1 | <b>If 'Was u langer dan de gehele periode van 4 weken afwezig van uw werk doordat u ziek was?' is equal to 'Ja' answer this question:</b><br>Wanneer heeft u zich ziek gemeld?                                                                                                                                                                                                                                  | <input type="text"/> <input type="text"/> <input type="text"/> (dd-mm-yyyy) |                                            |
| 11.5.5     | <b>If 'Hebt u betaald werk?' is equal to 'Ja' answer this question:</b><br>Waren er in de afgelopen 4 weken, dagen waarop u wel gewerkt heeft, maar tijdens uw werk last had van lichamelijke of psychische problemen?                                                                                                                                                                                          | <input type="radio"/> Ja<br><input type="radio"/> Nee                       |                                            |
| 11.5.5.1   | <b>If 'Waren er in de afgelopen 4 weken, dagen waarop u wel gewerkt heeft, maar tijdens uw werk last had van lichamelijke of psychische problemen?' is equal to 'Ja' answer this question:</b><br>Op hoeveel werkdagen had u tijdens uw werk last van uw lichamelijke of psychische problemen?                                                                                                                  | <input type="text"/> werkdagen                                              |                                            |
| 11.5.5.2   | <b>If 'Waren er in de afgelopen 4 weken, dagen waarop u wel gewerkt heeft, maar tijdens uw werk last had van lichamelijke of psychische problemen?' is equal to 'Ja' answer this question:</b><br>Op de dagen dat u last had, kon u misschien niet zoveel werk doen als normaal. Hoeveel werk kon u op deze dagen gemiddeld doen?                                                                               | Ik kon op deze dagen niks doen (0.00)                                       | Ik kon net zoveel doen als normaal (10.00) |
| 11.6       | Waren er dagen waarop u minder onbetaald werk kon doen door uw lichamelijke of psychische problemen?                                                                                                                                                                                                                                                                                                            | <input type="radio"/> Nee<br><input type="radio"/> Ja                       |                                            |
| 11.6.1     | <b>If 'Waren er dagen waarop u minder onbetaald werk kon doen door uw lichamelijke of psychische problemen?' is equal to 'Ja' answer this question:</b><br>Op hoeveel dagen was dit zo?                                                                                                                                                                                                                         | <input type="text"/> Dagen                                                  |                                            |
| 11.6.2     | <b>If 'Waren er dagen waarop u minder onbetaald werk kon doen door uw lichamelijke of psychische problemen?' is equal to 'Ja' answer this question:</b><br>Stel dat iemand, bijvoorbeeld uw partner, familielid of een bekende, u op deze dagen had geholpen. En al het onbetaalde werk wat u niet kon doen, voor u had gedaan. Hoeveel uur was die persoon hier op deze dagen dan gemiddeld mee bezig geweest? | <input type="text"/> uur op deze dagen                                      |                                            |

## Vragenlijst PRIMA studie 52 weken - PRODISQ - Zorggebruik

| Number | Question | Answers |
|--------|----------|---------|
|--------|----------|---------|

Wij willen graag weten met welke dokters u in de afgelopen 3 maanden een afspraak had. Het gaat om afspraken voor uzelf. Ook andere zorgverleners tellen mee. Bijvoorbeeld de fysiotherapeut.

1  
2  
3  
4  
5

12.1 Bent u in de afgelopen 3 maanden naar uw huisarts geweest?  Nee  
 Ja

6  
7  
8  
9  
10  
11

12.1.1 ***If 'Bent u in de afgelopen 3 maanden naar uw huisarts geweest?' is equal to 'Ja' answer this question:***  afspraken  
Hoeveel afspraken had u?

12  
13  
14  
15

12.2 Bent u in de afgelopen 3 maanden in contact geweest met een maatschappelijk werker?  Nee  
 Ja

16  
17  
18  
19  
20  
21

12.2.1 ***If 'Bent u in de afgelopen 3 maanden in contact geweest met een maatschappelijk werker?' is equal to 'Ja' answer this question:***  afspraken  
Hoeveel afspraken had u?

22  
23  
24  
25

12.3 Bent u in de afgelopen 3 maanden naar een fysiotherapeut geweest? Of een caesartherapeut, therapeut mensendieck of een manueel therapeut?  Nee  
 Ja

26  
27  
28  
29  
30  
31

12.3.1 ***If 'Bent u in de afgelopen 3 maanden naar een fysiotherapeut geweest? Of een caesartherapeut, therapeut mensendieck of een manueel therapeut?' is equal to 'Ja' answer this question:***  afspraken  
Hoeveel afspraken had u?

32  
33  
34  
35

12.4 Bent u in de afgelopen 3 maanden naar een ergotherapeut geweest?  Nee  
 Ja

36  
37  
38  
39  
40  
41

12.4.1 ***If 'Bent u in de afgelopen 3 maanden naar een ergotherapeut geweest?' is equal to 'Ja' answer this question:***  afspraken  
Hoeveel afspraken had u?

42  
43  
44  
45

12.5 Bent u in de afgelopen 3 maanden naar een logopedist geweest?  Nee  
 Ja

46  
47  
48  
49  
50  
51

12.5.1 ***If 'Bent u in de afgelopen 3 maanden naar een logopedist geweest?' is equal to 'Ja' answer this question:***  afspraken  
Hoeveel afspraken had u?

52  
53  
54  
55

12.6 Bent u in de afgelopen 3 maanden naar een diëtist geweest?  Nee  
 Ja

56  
57  
58  
59  
60

12.6.1 ***If 'Bent u in de afgelopen 3 maanden naar een diëtist geweest?' is equal to 'Ja' answer this question:***  afspraken  
Hoeveel afspraken had u?

1  
2  
3  
4  
5  
6  
7  
8  
9  
10  
11  
12  
13  
14  
15

12.7 Bent u in de afgelopen 3 maanden naar een homeopaat geweest? Of een acupuncturist?  Nee  
 Ja

16  
17  
18  
19  
20  
21  
22  
23  
24  
25

12.7.1 ***If 'Bent u in de afgelopen 3 maanden naar een homeopaat geweest? Of een acupuncturist?' is equal to 'Ja' answer this question:***  afspraken  
Hoeveel afspraken had u?

26  
27  
28  
29  
30  
31  
32  
33  
34  
35

12.8 Bent u in de afgelopen 3 maanden naar een psycholoog geweest? Of een psychotherapeut of psychiater?  Nee  
 Ja

36  
37  
38  
39  
40  
41  
42  
43  
44  
45

12.8.1 ***If 'Bent u in de afgelopen 3 maanden naar een psycholoog geweest? Of een psychotherapeut of psychiater?' is equal to 'Ja' answer this question:***  afspraken  
Hoeveel afspraken had u?

46  
47  
48  
49  
50  
51  
52  
53  
54  
55

12.9 Heeft u in de afgelopen 3 maanden afspraken gehad met de bedrijfsarts?  Nee  
 Ja

56  
57  
58  
59  
60

12.9.1 ***If 'Heeft u in de afgelopen 3 maanden afspraken gehad met de bedrijfsarts?' is equal to 'Ja' answer this question:***  afspraken  
Hoeveel afspraken had u?

12.10 Heeft u in de afgelopen 3 maanden hulp van de thuiszorg gehad?  Ja  
 Nee

12.10.1 ***If 'Heeft u in de afgelopen 3 maanden hulp van de thuiszorg gehad?' is equal to 'Ja' answer this question:***  Huishoudelijke hulp; voorbeeld: stofzuigen, bed opmaken, boodschappen doen  
Wat voor hulp van de thuiszorg heeft u gehad in de afgelopen 3 maanden?  Verzorging van uzelf; voorbeeld: hulp bij douchen of aankleden  
 Verpleging; voorbeeld: verband omdoen, medicijnen geven, bloeddruk meten

12.10.1.1 ***If 'Wat voor hulp van de thuiszorg heeft u gehad in de afgelopen 3 maanden?' is equal to 'Huishoudelijke hulp; voorbeeld: stofzuigen, bed opmaken, boodschappen doen' answer this question:***  weken in de afgelopen 3 maanden  
Hoeveel weken heeft u deze thuiszorg gehad?  
Huishoudelijke hulp:

12.10.1.2 ***If 'Wat voor hulp van de thuiszorg heeft u gehad in de afgelopen 3 maanden?' is equal to 'Verzorging van uzelf; voorbeeld: hulp bij douchen of aankleden' answer this question:***  weken in de afgelopen 3 maanden  
Hoeveel weken heeft u deze thuiszorg gehad?  
Verzorging van uzelf:

- 1  
2  
3  
4  
5  
6  
7  
8
- 12.10.1.3 **If 'Wat voor hulp van de thuiszorg heeft u gehad in de afgelopen 3 maanden?' is equal to 'Verpleging; voorbeeld: verband omdoen, medicijnen geven, bloeddruk meten' answer this question:**  
Hoeveel weken heeft u deze thuiszorg gehad?  
Verpleging:  weken in de afgelopen 3 maanden
- 9  
10  
11  
12  
13  
14  
15  
16  
17
- 12.10.1.4 **If 'Wat voor hulp van de thuiszorg heeft u gehad in de afgelopen 3 maanden?' is equal to 'Huishoudelijke hulp; voorbeeld: stofzuigen, bed opmaken, boodschappen doen' answer this question:**  
Hoeveel uur thuiszorg kreeg u in deze weken gemiddeld? Huishoudelijke hulp: gemiddeld  uur in de week
- 18  
19  
20  
21  
22  
23  
24
- 12.10.1.5 **If 'Wat voor hulp van de thuiszorg heeft u gehad in de afgelopen 3 maanden?' is equal to 'Verzorging van uzelf; voorbeeld: hulp bij douchen of aankleden' answer this question:**  
Hoeveel uur thuiszorg kreeg u in deze weken gemiddeld? Verzorging van uzelf: gemiddeld  uur in de week
- 25  
26  
27  
28  
29  
30  
31  
32
- 12.10.1.6 **If 'Wat voor hulp van de thuiszorg heeft u gehad in de afgelopen 3 maanden?' is equal to 'Verpleging; voorbeeld: verband omdoen, medicijnen geven, bloeddruk meten' answer this question:**  
Hoeveel uur thuiszorg kreeg u in deze weken gemiddeld? Verpleging: gemiddeld  uur in de week
- 33  
34  
35  
36
- 12.11 Heeft u in de afgelopen 3 maanden medicijnen gebruikt?  Ja  Nee
- 37  
38  
39  
40  
41  
42
- 12.11.1 **If 'Heeft u in de afgelopen 3 maanden medicijnen gebruikt?' is equal to 'Ja' answer this question:**  
Welke medicijnen heeft u in de afgelopen 3 maanden gebruikt?
- 43  
44  
45  
46  
47
- 12.12 Bent u in de afgelopen 3 maanden op de spoedeisende eerste hulp van een ziekenhuis geweest? (Een andere naam voor spoedeisende eerste hulp is EHBO)  Nee  Ja
- 48  
49  
50  
51  
52  
53  
54  
55
- 12.12.1 **If 'Bent u in de afgelopen 3 maanden op de spoedeisende eerste hulp van een ziekenhuis geweest? (Een andere naam voor spoedeisende eerste hulp is EHBO)' is equal to 'Ja' answer this question:**  
Hoe vaak bent u geweest?  keer
- 56  
57  
58  
59  
60
- 12.13 Bent u in de afgelopen 3 maanden met een ambulance naar het ziekenhuis gebracht? (Een andere naam voor ambulance is ziekenauto)  Nee  Ja

1  
2  
3  
4  
5  
6  
7

12.13.1 **If 'Bent u in de afgelopen 3 maanden met een ambulance naar het ziekenhuis gebracht? (Een andere naam voor ambulance is ziekenauto)' is equal to 'Ja' answer this question:**  keer  
Hoe vaak bent u naar het ziekenhuis gebracht?

8  
9  
10  
11  
12

12.14 Had u in de afgelopen 3 maanden een afspraak bij de polikliniek van het ziekenhuis? (Het gaat om afspraken voor uzelf met een dokter. Bijvoorbeeld met de cardioloog, reumatoloog of neuroloog)  Ja  
 Nee

13  
14  
15  
16  
17  
18  
19  
20  
21

12.14.1 **If 'Had u in de afgelopen 3 maanden een afspraak bij de polikliniek van het ziekenhuis? (Het gaat om afspraken voor uzelf met een dokter. Bijvoorbeeld met de cardioloog, reumatoloog of neuroloog)' is equal to 'Ja' answer this question:**   
Bij welke soorten dokters bent u in de afgelopen 3 maanden in het ziekenhuis geweest? En hoe vaak?

22  
23  
24  
25  
26

12.15 Bent u in de afgelopen 3 maanden overdag in het ziekenhuis geweest voor een behandeling? (U bleef dus niet slapen. U kwam bijvoorbeeld voor een bloedtransfusie, nierdialyse of chemokuur)  Ja  
 Nee

27  
28  
29  
30  
31  
32  
33  
34

12.15.1 **If 'Bent u in de afgelopen 3 maanden overdag in het ziekenhuis geweest voor een behandeling? (U bleef dus niet slapen. U kwam bijvoorbeeld voor een bloedtransfusie, nierdialyse of chemokuur)' is equal to 'Ja' answer this question:**   
Voor welke soort behandeling was dit?

35  
36  
37  
38  
39  
40  
41  
42

12.15.2 **If 'Bent u in de afgelopen 3 maanden overdag in het ziekenhuis geweest voor een behandeling? (U bleef dus niet slapen. U kwam bijvoorbeeld voor een bloedtransfusie, nierdialyse of chemokuur)' is equal to 'Ja' answer this question:**   
Hoeveel keer moest u in de afgelopen 3 maanden voor deze behandelingen naar het ziekenhuis?

43  
44  
45  
46  
47  
48  
49  
50

12.16 Bent u in de afgelopen 3 maanden ergens anders geweest voor een behandeling overdag? (U bleef dus niet slapen. U ging bijvoorbeeld naar de dagopvang van een woon-/zorgcentrum of een psychiatrische instelling. Of naar de dagbehandeling van een revalidatiecentrum)  Ja  
 Nee

51  
52  
53  
54  
55  
56  
57  
58  
59  
60

12.16.1 **If 'Bent u in de afgelopen 3 maanden ergens anders geweest voor een behandeling overdag? (U bleef dus niet slapen. U ging bijvoorbeeld naar de dagopvang van een woon-/zorgcentrum of een psychiatrische instelling. Of naar de dagbehandeling van een revalidatiecentrum)' is equal to 'Ja' answer this question:**  Woon-/zorgcentrum  
 Revalidatiecentrum  
 Psychiatrische instelling  
 Een andere instelling, namelijk  
Wat voor instelling was dit?

- 1  
2  
3  
4  
5  
6  
7
- 12.16.1.1 **If 'Wat voor instelling was dit?' is equal to 'Een andere instelling, namelijk' answer this question:**  
Wat voor instelling was dit?
- 8  
9  
10  
11  
12
- 12.16.1.2 **If 'Wat voor instelling was dit?' is equal to 'Woon-/zorgcentrum' answer this question:**  
Hoe vaak moest u hier in de afgelopen 3 maanden naartoe? Naar het woon-/zorgcentrum:
- 13  
14  
15  
16  
17
- 12.16.1.3 **If 'Wat voor instelling was dit?' is equal to 'Revalidatiecentrum' answer this question:**  
Hoe vaak moest u hier in de afgelopen 3 maanden naartoe? Naar het revalidatiecentrum:
- 18  
19  
20  
21  
22  
23
- 12.16.1.4 **If 'Wat voor instelling was dit?' is equal to 'Psychiatrische instelling' answer this question:**  
Hoe vaak moest u hier in de afgelopen 3 maanden naartoe? Naar de psychiatrische instelling:
- 24  
25  
26  
27  
28
- 12.16.1.5 **If 'Wat voor instelling was dit?' is equal to 'Een andere instelling, namelijk' answer this question:**  
Hoe vaak moest u hier in de afgelopen 3 maanden naartoe? Naar de andere instelling:
- 29  
30  
31  
32  
33
- 12.17 Heeft u in de afgelopen 3 maanden weleens in het ziekenhuis gelegen? (U moest dus blijven slapen. Bijvoorbeeld omdat u geopereerd was en niet meteen naar huis kon)
- 34  
35  
36  
37  
38  
39  
40  
41  
42
- 12.17.1 **If 'Heeft u in de afgelopen 3 maanden weleens in het ziekenhuis gelegen? (U moest dus blijven slapen. Bijvoorbeeld omdat u geopereerd was en niet meteen naar huis kon)' is equal to 'Ja' answer this question:**  
Hoe vaak heeft u in de afgelopen 3 maanden in het ziekenhuis gelegen?
- 43  
44  
45  
46  
47  
48  
49
- 12.17.2 **If 'Heeft u in de afgelopen 3 maanden weleens in het ziekenhuis gelegen? (U moest dus blijven slapen. Bijvoorbeeld omdat u geopereerd was en niet meteen naar huis kon)' is equal to 'Ja' answer this question:**  
Hoe lang heeft u in het ziekenhuis gelegen?
- 50  
51  
52  
53  
54  
55  
56  
57  
58  
59  
60



- 1  
2  
3  
4  
5  
6  
7  
8
- 12.18.1 **If 'Moest u in de afgelopen 3 maanden ergens anders blijven slapen voor uw gezondheid? (Bijvoorbeeld in een woon-/zorgcentrum, psychiatrische instelling of revalidatiecentrum)' is equal to 'Ja' answer this question:**  
Wat voor instelling was dit?
- Woon-/zorgcentrum  
 Revalidatiecentrum  
 Psychiatrische instelling  
 Een andere instelling, namelijk
- 
- 9  
10  
11  
12  
13  
14
- 12.18.1.1 **If 'Wat voor instelling was dit?' is equal to 'Een andere instelling, namelijk' answer this question:**  
Een andere instelling, namelijk
- 
- 
- 15  
16  
17  
18  
19
- 12.18.1.2 **If 'Wat voor instelling was dit?' is equal to 'Woon-/zorgcentrum' answer this question:**  
Hoe lang bent u in deze instelling geweest? In het woon-/zorgcentrum:
- dagen in de afgelopen 3 maanden
- 
- 20  
21  
22  
23  
24  
25
- 12.18.1.3 **If 'Wat voor instelling was dit?' is equal to 'Revalidatiecentrum' answer this question:**  
Hoe lang bent u in deze instelling geweest? In het revalidatiecentrum:
- dagen in de afgelopen 3 maanden
- 
- 26  
27  
28  
29  
30
- 12.18.1.4 **If 'Wat voor instelling was dit?' is equal to 'Psychiatrische instelling' answer this question:**  
Hoe lang bent u in deze instelling geweest? In de psychiatrische instelling:
- dagen in de afgelopen 3 maanden
- 
- 31  
32  
33  
34  
35
- 12.18.1.5 **If 'Wat voor instelling was dit?' is equal to 'Een andere instelling, namelijk' answer this question:**  
Hoe lang bent u in deze instelling geweest? In de andere instelling:
- dagen in de afgelopen 3 maanden
- 
- 36  
37  
38  
39  
40
- 12.19 Heeft u in de afgelopen 3 maanden hulp gekregen van een familielid of een bekende vanwege uw lichamelijke of psychische problemen?
- Ja  
 Nee
- 
- 41  
42  
43  
44  
45  
46  
47  
48  
49  
50  
51  
52  
53  
54  
55  
56  
57  
58  
59  
60
- 12.19.1 **If 'Heeft u in de afgelopen 3 maanden hulp gekregen van een familielid of een bekende vanwege uw lichamelijke of psychische problemen?' is equal to 'Ja' answer this question:**  
Wat voor hulp van familieleden of bekenden heeft u gehad in de afgelopen 3 maanden?
- Huishoudelijke hulp - voorbeeld: stofzuigen, bed opmaken, boodschappen doen, klaarmaken van eten en drinken, verzorgen van kinderen  
 Verzorging van uzelf - voorbeeld: hulp bij douchen of aankleden, hulp bij het eten en drinken of het geven van medicijnen  
 Praktische hulp - voorbeeld: ondersteuning bij wandelen, het maken van uitstapjes of bezoeken aan bekenden, bezoeken aan de huisarts of het ziekenhuis, het regelen van hulp of het regelen van financiële zaken

- 1  
2  
3  
4  
5  
6  
7  
8  
9  
10
- 12.19.1.1 **If 'Wat voor hulp van familieleden of bekenden heeft u gehad in de afgelopen 3 maanden?' is equal to 'Huishoudelijke hulp - voorbeeld: stofzuigen, bed opmaken, boodschappen doen, klaarmaken van eten en drinken, verzorgen van kinderen' answer this question:**  
Hoeveel weken heeft u deze hulp gehad?  
Huishoudelijke hulp:
- weken in de afgelopen 3 maanden
- 
- 11  
12  
13  
14  
15  
16  
17  
18  
19
- 12.19.1.2 **If 'Wat voor hulp van familieleden of bekenden heeft u gehad in de afgelopen 3 maanden?' is equal to 'Verzorging van uzelf - voorbeeld: hulp bij douchen of aankleden, hulp bij het eten en drinken of het geven van medicijnen' answer this question:**  
Hoeveel weken heeft u deze hulp gehad? Verzorging van uzelf:
- weken in de afgelopen 3 maanden
- 
- 20  
21  
22  
23  
24  
25  
26  
27  
28  
29  
30  
31
- 12.19.1.3 **If 'Wat voor hulp van familieleden of bekenden heeft u gehad in de afgelopen 3 maanden?' is equal to 'Praktische hulp - voorbeeld: ondersteuning bij wandelen, het maken van uitstapjes of bezoeken aan bekenden, bezoeken aan de huisarts of het ziekenhuis, het regelen van hulp of het regelen van financiële zaken' answer this question:**  
Hoeveel uur hulp kreeg u in deze weken gemiddeld?  
Praktische hulp:
- weken in de afgelopen 3 maanden
- 
- 32  
33  
34  
35  
36  
37  
38  
39  
40  
41
- 12.19.1.4 **If 'Wat voor hulp van familieleden of bekenden heeft u gehad in de afgelopen 3 maanden?' is equal to 'Huishoudelijke hulp - voorbeeld: stofzuigen, bed opmaken, boodschappen doen, klaarmaken van eten en drinken, verzorgen van kinderen' answer this question:**  
Hoeveel uur hulp kreeg u in deze weken gemiddeld?  
Huishoudelijke hulp: gemiddeld
- uur in de week
- 
- 42  
43  
44  
45  
46  
47  
48  
49
- 12.19.1.5 **If 'Wat voor hulp van familieleden of bekenden heeft u gehad in de afgelopen 3 maanden?' is equal to 'Verzorging van uzelf - voorbeeld: hulp bij douchen of aankleden, hulp bij het eten en drinken of het geven van medicijnen' answer this question:**  
Hoeveel uur hulp kreeg u in deze weken gemiddeld?  
Verzorging van uzelf: gemiddeld
- uur in de week
- 
- 50  
51  
52  
53  
54  
55  
56  
57  
58  
59  
60
- 12.19.1.6 **If 'Wat voor hulp van familieleden of bekenden heeft u gehad in de afgelopen 3 maanden?' is equal to 'Praktische hulp - voorbeeld: ondersteuning bij wandelen, het maken van uitstapjes of bezoeken aan bekenden, bezoeken aan de huisarts of het ziekenhuis, het regelen van hulp of het regelen van financiële zaken' answer this question:**  
Hoeveel uur hulp kreeg u in deze weken gemiddeld?  
Praktische hulp: gemiddeld
- uur in de week

## Vragenlijst PRIMA studie 52 weken - Dank

| Number | Question                                                                                                                                      | Answers                                                                   |
|--------|-----------------------------------------------------------------------------------------------------------------------------------------------|---------------------------------------------------------------------------|
| 13.1   | Hartelijk dank voor de tijd die u heeft genomen om de vragenlijsten in te vullen. Indien u nog opmerkingen heeft kunt u deze hierin plaatsen. | <div style="border: 1px dashed black; width: 200px; height: 60px;"></div> |

## Survey 'Vragenlijst PRIMA studie 6 weken'

### Vragenlijst PRIMA studie 6 weken - AOFAS - Pijn

| Number | Question                            | Answers                                                                                                                                                                                                         |
|--------|-------------------------------------|-----------------------------------------------------------------------------------------------------------------------------------------------------------------------------------------------------------------|
| 1.1    | Hoeveel pijn ervaart u aan uw voet? | <input type="checkbox"/> Geen<br><input type="checkbox"/> Milde pijnklachten of af en toe pijn<br><input type="checkbox"/> Matige pijnklachten, dagelijks<br><input type="checkbox"/> Vrijwel continu erge pijn |

### Vragenlijst PRIMA studie 6 weken - AOFAS resterende gedeelte

| Number | Question                                              | Answers                                                                                                                                                                                                                                                                                                                                                                                                                                           |
|--------|-------------------------------------------------------|---------------------------------------------------------------------------------------------------------------------------------------------------------------------------------------------------------------------------------------------------------------------------------------------------------------------------------------------------------------------------------------------------------------------------------------------------|
| 2.1    | Hoeveel beperkingen in het dagelijks leven ervaart u? | <input type="radio"/> Geen beperkingen, geen hulpmiddelen nodig<br><input type="radio"/> Geen beperkingen in algemeen dagelijkse bezigheden, wel beperkingen in recreatieve activiteiten (sport, hobbies, etc) geen ondersteuning<br><input type="radio"/> Beperkingen bij dagelijkse- en recreatieve activiteiten, stok<br><input type="radio"/> Ernstige beperkingen bij dagelijkse- en recreatieactiviteiten, walker, krukken, rolstoel, brace |

- 1  
2  
3  
4  
5  
6  
7  
8
- 
- 2.2 Wat is de afstand die u in één keer kunt lopen?
- Meer dan 600 meter
  - 400 - 600 meter
  - 100 - 300 meter
  - Minder dan 100 meter
- 
- 9  
10  
11  
12  
13  
14  
15  
16
- 2.3 Heeft u moeite met lopen op een bepaalde ondergrond?
- Geen problemen bij lopen
  - Enig problemen op ongelijke ondergrond, trap, helling, ladders
  - Ernstige problemen bij ongelijke ondergrond, trap, helling, ladders
- 
- 17  
18  
19  
20  
21  
22
- 2.4 Hoe zou u uw looppatroon beoordelen?
- Normaal of minimaal afwijkend
  - Duidelijk
  - Ernstig
- 
- 23  
24  
25  
26  
27  
28  
29
- 2.5 Hoe zou u de beweeglijkheid van uw voet beoordelen ten opzichte van de andere zijde of ten opzichte van vóór het ongeval?
- Hetzelfde of licht beperkt t.o.v. de niet aangedane zijde of zoals voor het ongeval
  - Ongeveer de helft beperkt
  - Sterk verminderd, bijna geen bewegingen mogelijk
- 
- 30  
31  
32  
33  
34  
35  
36  
37
- 2.6 Hoe zou u de beweeglijkheid van uw enkel beoordelen ten opzichte van de andere zijde of ten opzichte van voor het ongeval?
- Hetzelfde of licht beperkt t.o.v. de niet aangedane zijde of zoals voor het ongeval
  - Ongeveer de helft beperkt
  - Sterk verminderd, bijna geen bewegingen mogelijk
- 
- 38  
39  
40  
41  
42  
43
- 2.7 Hoe zou u de stabiliteit van uw voet en enkel beoordelen
- Stabiel, ik verzwik mijn enkel hooguit incidenteel
  - Niet stabiel, ik verzwik mijn enkel vaak
- 
- 44  
45  
46  
47  
48  
49  
50  
51  
52  
53  
54  
55  
56  
57  
58  
59  
60
- 2.8 Hoe zou u de stand van uw voet beoordelen ten opzichte van de andere zijde of ten opzichte van voor het ongeval?
- Goed, ik kan mijn voet goed plat op de grond zetten, waarbij de stand niet afwijkend is
  - Ik sta vrijwel alleen op de buitenzijde van mijn voet
  - Ik kan mijn voet niet plat op de grond zetten en loop vrijwel alleen op mijn voorvoet

## Vragenlijst PRIMA studie 6 weken - VAS Pain score

1  
2  
3  
4  
5  
6  
7  
8  
9  
10  
11  
12  
13  
14  
15  
16  
17  
18  
19  
20  
21  
22  
23  
24  
25  
26  
27  
28  
29  
30  
31  
32  
33  
34  
35  
36  
37  
38  
39  
40  
41  
42  
43  
44  
45  
46  
47  
48  
49  
50  
51  
52  
53  
54  
55  
56  
57  
58  
59  
60

| Number | Question                                                                                                                                                             | Answers             |
|--------|----------------------------------------------------------------------------------------------------------------------------------------------------------------------|---------------------|
| 3.1    | VAS pijnscore (Geef uw minimaal pijnscore aan tijdens dagelijkse activiteiten op een schaal van 0 tot 100, waarbij 0 geen pijn is en 100 de ergste pijn denkbaar is) | (0.00) 100 (100.00) |

## Vragenlijst PRIMA studie 6 weken - AAS

| Number | Question | Answers |
|--------|----------|---------|
|--------|----------|---------|

- 1  
2  
3  
4  
5  
6  
7  
8  
9  
10  
11  
12  
13  
14  
15  
16  
17  
18  
19  
20  
21  
22  
23  
24  
25  
26  
27  
28  
29  
30  
31  
32  
33  
34  
35  
36  
37  
38  
39  
40  
41  
42  
43  
44  
45  
46  
47  
48  
49  
50  
51  
52  
53  
54  
55  
56  
57  
58  
59  
60
- 4.1 Wat is het meest bij u van toepassing ten aanzien van uw activiteit?
- American Football
  - Basketbal
  - Gymnastiek/turnen
  - Handbal
  - Rugby
  - Voetbal
  - Hockey
  - Korfbal
  - Gevechtssporten: judo, karate, kung fu, taekwando, jiu jitsu, etc.
  - Oriëntatiewandelen
  - Rhythmische gymnastiek
  - Volleybal
  - Boxen
  - Freestyle snowboarden
  - IJshockey
  - Tennis
  - Worstelen
  - Fitness, aerobics
  - Badminton
  - Baseball
  - Cross-country hardlopen
  - Moderne pentathlon
  - Squash
  - Surfen, windsurfen
  - Tafel tennis
  - Atletiek: spring-, werponderdelen
  - Waterskiën
  - Dans
  - Schermen
  - Zaalhockey
  - Bergbeklimmen
  - Langlauf
  - Parachute springen
  - Softball
  - Speciale beroepen en werkactiviteiten; speciale beroepen: ballet, professioneel soldaat, speciale reddingswerker, stuntman, etc.
  - Duiken
  - Scubaduiken
  - Skaten, in-line skaten
  - Atletiek: looponderdelen
  - Triatlon
  - Gewichtsheffen, body-building

- Alle competitieve sporten hieronder met 'seasonal' conditioning
- Zwaar fysiek werk
- Alpine skiën en snowboarden
- Bowlen/curlen
- Golf
- Mountainbike/BMX
- Powerliften
- Zeilen
- Fysiek werk
- Wielrennen
- Paardrijden
- Motorsporten/technische sporten
- Roeien, kayakken
- Boogschieten
- Water polo en zwemmen
- Kunnen lopen op oneven grond
- Geen sport, echter geen limitatie in dagelijkse activiteiten
- Kunnen lopen op even grond, maar de dagelijkse activiteiten zijn gelimiteerd
- Niet kunnen lopen, fysieke handicap wegens enkelproblemen

- 
- 4.1.1 ***If 'Wat is het meest bij u van toepassing ten aanzien van uw activiteit?' is equal to 'American Football' answer this question:***  
American Football
- Professioneel
- Competitief
- Recreatief
- 
- 4.1.2 ***If 'Wat is het meest bij u van toepassing ten aanzien van uw activiteit?' is equal to 'Basketbal' answer this question:***  
Basketbal
- Professioneel
- Competitief
- Recreatief
- 
- 4.1.3 ***If 'Wat is het meest bij u van toepassing ten aanzien van uw activiteit?' is equal to 'Gymnastiek/turnen' answer this question:***  
Gymnastiek/turnen
- Professioneel
- Competitief
- Recreatief
- 
- 4.1.4 ***If 'Wat is het meest bij u van toepassing ten aanzien van uw activiteit?' is equal to 'Handbal' answer this question:***  
Handbal
- Professioneel
- Competitief
- Recreatief
- 
- 4.1.5 ***If 'Wat is het meest bij u van toepassing ten aanzien van uw activiteit?' is equal to 'Rugby' answer this question:***  
Rugby
- Professioneel
- Competitief
- Recreatief

|    |        |                                                                                                                                                                                          |                                     |
|----|--------|------------------------------------------------------------------------------------------------------------------------------------------------------------------------------------------|-------------------------------------|
| 1  |        |                                                                                                                                                                                          |                                     |
| 2  | 4.1.6  | <b>If 'Wat is het meest bij u van toepassing ten aanzien van uw acitiviteit?' is equal to 'Voetbal' answer this question:</b>                                                            | <input type="radio"/> Professioneel |
| 3  |        |                                                                                                                                                                                          | <input type="radio"/> Competitief   |
| 4  |        |                                                                                                                                                                                          | <input type="radio"/> Recreatief    |
| 5  |        | Voetbal                                                                                                                                                                                  |                                     |
| 6  |        |                                                                                                                                                                                          |                                     |
| 7  |        |                                                                                                                                                                                          |                                     |
| 8  | 4.1.7  | <b>If 'Wat is het meest bij u van toepassing ten aanzien van uw acitiviteit?' is equal to 'Hockey' answer this question:</b>                                                             | <input type="radio"/> Professioneel |
| 9  |        |                                                                                                                                                                                          | <input type="radio"/> Competitief   |
| 10 |        |                                                                                                                                                                                          | <input type="radio"/> Recreatief    |
| 11 |        | Hockey                                                                                                                                                                                   |                                     |
| 12 |        |                                                                                                                                                                                          |                                     |
| 13 |        |                                                                                                                                                                                          |                                     |
| 14 | 4.1.8  | <b>If 'Wat is het meest bij u van toepassing ten aanzien van uw acitiviteit?' is equal to 'Korfbal' answer this question:</b>                                                            | <input type="radio"/> Professioneel |
| 15 |        |                                                                                                                                                                                          | <input type="radio"/> Competitief   |
| 16 |        |                                                                                                                                                                                          | <input type="radio"/> Recreatief    |
| 17 |        | Korfbal                                                                                                                                                                                  |                                     |
| 18 |        |                                                                                                                                                                                          |                                     |
| 19 |        |                                                                                                                                                                                          |                                     |
| 20 | 4.1.9  | <b>If 'Wat is het meest bij u van toepassing ten aanzien van uw acitiviteit?' is equal to 'Gevechtssporten: judo, karate, kung fu, taekwando, jiu jitsu, etc.' answer this question:</b> | <input type="radio"/> Professioneel |
| 21 |        |                                                                                                                                                                                          | <input type="radio"/> Competitief   |
| 22 |        |                                                                                                                                                                                          | <input type="radio"/> Recreatief    |
| 23 |        | Gevechtssporten: judo, karate, kung fu, taekwando, jiu jitsu, etc.                                                                                                                       |                                     |
| 24 |        |                                                                                                                                                                                          |                                     |
| 25 |        |                                                                                                                                                                                          |                                     |
| 26 |        |                                                                                                                                                                                          |                                     |
| 27 | 4.1.10 | <b>If 'Wat is het meest bij u van toepassing ten aanzien van uw acitiviteit?' is equal to 'Oriëntatielopen' answer this question:</b>                                                    | <input type="radio"/> Professioneel |
| 28 |        |                                                                                                                                                                                          | <input type="radio"/> Competitief   |
| 29 |        |                                                                                                                                                                                          | <input type="radio"/> Recreatief    |
| 30 |        | Oriëntatielopen                                                                                                                                                                          |                                     |
| 31 |        |                                                                                                                                                                                          |                                     |
| 32 |        |                                                                                                                                                                                          |                                     |
| 33 | 4.1.11 | <b>If 'Wat is het meest bij u van toepassing ten aanzien van uw acitiviteit?' is equal to 'Rhythmische gymnastiek' answer this question:</b>                                             | <input type="radio"/> Professioneel |
| 34 |        |                                                                                                                                                                                          | <input type="radio"/> Competitief   |
| 35 |        |                                                                                                                                                                                          | <input type="radio"/> Recreatief    |
| 36 |        | Rhythmisch gymnastiek                                                                                                                                                                    |                                     |
| 37 |        |                                                                                                                                                                                          |                                     |
| 38 |        |                                                                                                                                                                                          |                                     |
| 39 | 4.1.12 | <b>If 'Wat is het meest bij u van toepassing ten aanzien van uw acitiviteit?' is equal to 'Volleybal' answer this question:</b>                                                          | <input type="radio"/> Professioneel |
| 40 |        |                                                                                                                                                                                          | <input type="radio"/> Competitief   |
| 41 |        |                                                                                                                                                                                          | <input type="radio"/> Recreatief    |
| 42 |        | Volleybal                                                                                                                                                                                |                                     |
| 43 |        |                                                                                                                                                                                          |                                     |
| 44 | 4.1.13 | <b>If 'Wat is het meest bij u van toepassing ten aanzien van uw acitiviteit?' is equal to 'Boxen' answer this question:</b>                                                              | <input type="radio"/> Professioneel |
| 45 |        |                                                                                                                                                                                          | <input type="radio"/> Competitief   |
| 46 |        |                                                                                                                                                                                          | <input type="radio"/> Recreatief    |
| 47 |        | Boxen                                                                                                                                                                                    |                                     |
| 48 |        |                                                                                                                                                                                          |                                     |
| 49 |        |                                                                                                                                                                                          |                                     |
| 50 | 4.1.14 | <b>If 'Wat is het meest bij u van toepassing ten aanzien van uw acitiviteit?' is equal to 'Freestyle snowboarden' answer this question:</b>                                              | <input type="radio"/> Professioneel |
| 51 |        |                                                                                                                                                                                          | <input type="radio"/> Competitief   |
| 52 |        |                                                                                                                                                                                          | <input type="radio"/> Recreatief    |
| 53 |        | Freestyle snowboarden                                                                                                                                                                    |                                     |
| 54 |        |                                                                                                                                                                                          |                                     |
| 55 |        |                                                                                                                                                                                          |                                     |
| 56 | 4.1.15 | <b>If 'Wat is het meest bij u van toepassing ten aanzien van uw acitiviteit?' is equal to 'Freestyle snowboarden' answer this question:</b>                                              | <input type="radio"/> Professioneel |
| 57 |        |                                                                                                                                                                                          | <input type="radio"/> Competitief   |
| 58 |        |                                                                                                                                                                                          | <input type="radio"/> Recreatief    |
| 59 |        | IJshockey                                                                                                                                                                                |                                     |
| 60 |        |                                                                                                                                                                                          |                                     |



- 1  
2  
3  
4  
5  
6  
7
- 4.1.16 ***If 'Wat is het meest bij u van toepassing ten aanzien van uw acitiviteit?' is equal to 'Tennis' answer this question:***  
Tennis  Professioneel  
 Competitief  
 Recreatief
- 8  
9  
10  
11  
12
- 4.1.17 ***If 'Wat is het meest bij u van toepassing ten aanzien van uw acitiviteit?' is equal to 'Worstelen' answer this question:***  
Worstelen  Professioneel  
 Competitief  
 Recreatief
- 13  
14  
15  
16  
17  
18
- 4.1.18 ***If 'Wat is het meest bij u van toepassing ten aanzien van uw acitiviteit?' is equal to 'Fitness, aerobics' answer this question:***  
Fitness, aerobics  Professioneel  
 Competitief  
 Recreatief
- 19  
20  
21  
22  
23  
24
- 4.1.19 ***If 'Wat is het meest bij u van toepassing ten aanzien van uw acitiviteit?' is equal to 'Badminton' answer this question:***  
Badminton  Professioneel  
 Competitief  
 Recreatief
- 25  
26  
27  
28  
29  
30
- 4.1.20 ***If 'Wat is het meest bij u van toepassing ten aanzien van uw acitiviteit?' is equal to 'Baseball' answer this question:***  
Baseball  Professioneel  
 Competitief  
 Recreatief
- 31  
32  
33  
34  
35
- 4.1.21 ***If 'Wat is het meest bij u van toepassing ten aanzien van uw acitiviteit?' is equal to 'Cross-country hardlopen' answer this question:***  
Cross-country hardlopen  Professioneel  
 Competitief  
 Recreatief
- 36  
37  
38  
39  
40  
41
- 4.1.22 ***If 'Wat is het meest bij u van toepassing ten aanzien van uw acitiviteit?' is equal to 'Moderne pentathlon' answer this question:***  
Moderne pentathlon  Professioneel  
 Competitief  
 Recreatief
- 42  
43  
44  
45  
46  
47
- 4.1.23 ***If 'Wat is het meest bij u van toepassing ten aanzien van uw acitiviteit?' is equal to 'Squash' answer this question:***  
Squash  Professioneel  
 Competitief  
 Recreatief
- 48  
49  
50  
51  
52  
53
- 4.1.24 ***If 'Wat is het meest bij u van toepassing ten aanzien van uw acitiviteit?' is equal to 'Surfen, windsurfen' answer this question:***  
Surfen, windsurfen  Professioneel  
 Competitief  
 Recreatief
- 54  
55  
56  
57  
58  
59  
60
- 4.1.25 ***If 'Wat is het meest bij u van toepassing ten aanzien van uw acitiviteit?' is equal to 'Tafel tennis' answer this question:***  
Tafel tennis  Professioneel  
 Competitief  
 Recreatief

- 1  
2  
3  
4  
5  
6  
7
- 4.1.26 **If 'Wat is het meest bij u van toepassing ten aanzien van uw acitiviteit?' is equal to 'Atletiek: spring-, werponderdelen' answer this question:**  
Atletiek: spring-, werponderdelen
- Professioneel  
 Competitief  
 Recreatief
- 
- 8  
9  
10  
11  
12
- 4.1.27 **If 'Wat is het meest bij u van toepassing ten aanzien van uw acitiviteit?' is equal to 'Waterskieën' answer this question:**  
Waterskien
- Professioneel  
 Competitief  
 Recreatief
- 
- 13  
14  
15  
16  
17  
18
- 4.1.28 **If 'Wat is het meest bij u van toepassing ten aanzien van uw acitiviteit?' is equal to 'Dans' answer this question:**  
Dans
- Professioneel  
 Competitief  
 Recreatief
- 
- 19  
20  
21  
22  
23  
24
- 4.1.29 **If 'Wat is het meest bij u van toepassing ten aanzien van uw acitiviteit?' is equal to 'Schermen' answer this question:**  
Schermen
- Professioneel  
 Competitief  
 Recreatief
- 
- 25  
26  
27  
28  
29  
30
- 4.1.30 **If 'Wat is het meest bij u van toepassing ten aanzien van uw acitiviteit?' is equal to 'Zaalhockey' answer this question:**  
Zaalhockey
- Professioneel  
 Competitief  
 Recreatief
- 
- 31  
32  
33  
34  
35
- 4.1.31 **If 'Wat is het meest bij u van toepassing ten aanzien van uw acitiviteit?' is equal to 'Bergbeklimmen' answer this question:**  
Bergbeklimmen
- Professioneel  
 Competitief  
 Recreatief
- 
- 36  
37  
38  
39  
40  
41
- 4.1.32 **If 'Wat is het meest bij u van toepassing ten aanzien van uw acitiviteit?' is equal to 'Langlauf' answer this question:**  
Langlauf
- Professioneel  
 Competitief  
 Recreatief
- 
- 42  
43  
44  
45  
46  
47
- 4.1.33 **If 'Wat is het meest bij u van toepassing ten aanzien van uw acitiviteit?' is equal to 'Parachute springen' answer this question:**  
Parachute springen
- Professioneel  
 Competitief  
 Recreatief
- 
- 48  
49  
50  
51  
52  
53  
54  
55  
56  
57  
58  
59  
60
- 4.1.34 **If 'Wat is het meest bij u van toepassing ten aanzien van uw acitiviteit?' is equal to 'Softball' answer this question:**  
Softball
- Professioneel  
 Competitief  
 Recreatief

- 1  
2  
3  
4  
5  
6  
7  
8  
9  
10  
11  
12
- 4.1.35 ***If 'Wat is het meest bij u van toepassing ten aanzien van uw activiteit?' is equal to 'Speciale beroepen en werkactiviteiten; speciale beroepen: ballet, professioneel soldaat, speciale reddingswerker, stuntman, etc.' answer this question:***  
Speciale beroepen en werkactiviteiten speciale beroepen: ballet, professioneel soldaat, speciale reddingswerker, stuntman, etc.
- ballet, professioneel soldaat, speciale reddingswerker, stuntman, etc.
- 
- 13  
14  
15  
16  
17
- 4.1.36 ***If 'Wat is het meest bij u van toepassing ten aanzien van uw activiteit?' is equal to 'Duiken' answer this question:***  
Duiken
- Professioneel/competitief  
 Recreatief
- 
- 18  
19  
20  
21  
22
- 4.1.37 ***If 'Wat is het meest bij u van toepassing ten aanzien van uw activiteit?' is equal to 'Scubaduiken' answer this question:***  
Scubaduiken
- Professioneel/competitief  
 Recreatief
- 
- 23  
24  
25  
26  
27  
28
- 4.1.38 ***If 'Wat is het meest bij u van toepassing ten aanzien van uw activiteit?' is equal to 'Skaten, in-line skaten' answer this question:***  
skaten, in-linen skaten
- Professioneel/competitief  
 Recreatief
- 
- 29  
30  
31  
32  
33
- 4.1.39 ***If 'Wat is het meest bij u van toepassing ten aanzien van uw activiteit?' is equal to 'Atletiek: looponderdelen' answer this question:***  
Atletiek: looponderdelen
- Professioneel/competitief  
 Recreatief
- 
- 34  
35  
36  
37  
38
- 4.1.40 ***If 'Wat is het meest bij u van toepassing ten aanzien van uw activiteit?' is equal to 'Triatlon' answer this question:***  
triatlon
- Professioneel/competitief  
 Recreatief
- 
- 39  
40  
41  
42  
43  
44  
45
- 4.1.41 ***If 'Wat is het meest bij u van toepassing ten aanzien van uw activiteit?' is equal to 'Gewichtsheffen, body-building' answer this question:***  
Gewichtsheffen, body-building
- Professioneel/competitief  
 Recreatief
- 
- 46  
47  
48  
49  
50  
51  
52
- 4.1.42 ***If 'Wat is het meest bij u van toepassing ten aanzien van uw activiteit?' is equal to 'Alle competitieve sporten hieronder met 'seasonal' conditioning' answer this question:***  
Alle competitieve sporten hieronder met 'seasonal' conditioning
- Alle competitieve sporten hieronder met 'seasonal' conditioning
- 
- 53  
54  
55  
56  
57  
58  
59  
60
- 4.1.43 ***If 'Wat is het meest bij u van toepassing ten aanzien van uw activiteit?' is equal to 'Zwaar fysiek werk' answer this question:***  
Zwaar fysiek werk
- Alle competitieve sporten hieronder met 'seasonal' conditioning

- 1  
2  
3  
4  
5  
6  
7  
8  
9  
10  
11  
12  
13  
14  
15  
16  
17  
18  
19  
20  
21  
22  
23  
24  
25  
26  
27  
28  
29  
30  
31  
32  
33  
34  
35  
36  
37  
38  
39  
40  
41  
42  
43  
44  
45  
46  
47  
48  
49  
50  
51  
52  
53  
54  
55  
56  
57  
58  
59  
60
- 
- 4.1.44 ***If 'Wat is het meest bij u van toepassing ten aanzien van uw acitiviteit?' is equal to 'Alpine skiën en snowboarden' answer this question:***  
Alpine skien en snowboarden  Alpine skien en snowboarden
- 
- 4.1.45 ***If 'Wat is het meest bij u van toepassing ten aanzien van uw acitiviteit?' is equal to 'Bowlen/curlen' answer this question:***  
Bowlen/curlen  Bowlen/curlen
- 
- 4.1.46 ***If 'Wat is het meest bij u van toepassing ten aanzien van uw acitiviteit?' is equal to 'Golf' answer this question:***  
Golf  Golf
- 
- 4.1.47 ***If 'Wat is het meest bij u van toepassing ten aanzien van uw acitiviteit?' is equal to 'Mountainbike/BMX' answer this question:***  
Mountainbike/BMX  Mountainbike/BMX
- 
- 4.1.48 ***If 'Wat is het meest bij u van toepassing ten aanzien van uw acitiviteit?' is equal to 'Powerliften' answer this question:***  
Powerliften  Powerliften
- 
- 4.1.49 ***If 'Wat is het meest bij u van toepassing ten aanzien van uw acitiviteit?' is equal to 'Zeilen' answer this question:***  
Zeilen  Zeilen
- 
- 4.1.50 ***If 'Wat is het meest bij u van toepassing ten aanzien van uw acitiviteit?' is equal to 'Fysiek werk' answer this question:***  
Fysiek werk  Fysiek werk
- 
- 4.1.51 ***If 'Wat is het meest bij u van toepassing ten aanzien van uw acitiviteit?' is equal to 'Wielrennen' answer this question:***  
Wielrennen  Wielrennen
- 
- 4.1.52 ***If 'Wat is het meest bij u van toepassing ten aanzien van uw acitiviteit?' is equal to 'Paardrijden' answer this question:***  
Paardrijden  Paardrijden
- 
- 4.1.53 ***If 'Wat is het meest bij u van toepassing ten aanzien van uw acitiviteit?' is equal to 'Motorsporten/technische sporten' answer this question:***  
Motorsporten/technische sporten  Motorsporten/technische sporten
- 
- 4.1.54 ***If 'Wat is het meest bij u van toepassing ten aanzien van uw acitiviteit?' is equal to 'Roeien, kayakken' answer this question:***  
Roeien, kayakken  Roeien, kayakken

|        |                                                                                                                                                                                                                                                                                      |                                                                                                     |
|--------|--------------------------------------------------------------------------------------------------------------------------------------------------------------------------------------------------------------------------------------------------------------------------------------|-----------------------------------------------------------------------------------------------------|
| 4.1.55 | <b>If 'Wat is het meest bij u van toepassing ten aanzien van uw acitiviteit?' is equal to 'Boogschieten' answer this question:</b><br>Boogschieten                                                                                                                                   | <input type="radio"/> Boogschieten                                                                  |
| 4.1.56 | <b>If 'Wat is het meest bij u van toepassing ten aanzien van uw acitiviteit?' is equal to 'Water polo en zwemmen' answer this question:</b><br>Water polo en zwemmen                                                                                                                 | <input type="radio"/> Water polo en zwemmen                                                         |
| 4.1.57 | <b>If 'Wat is het meest bij u van toepassing ten aanzien van uw acitiviteit?' is equal to 'Kunnen lopen op oneven grond' answer this question:</b><br>Kunnen lopen op oneven grond                                                                                                   | <input type="radio"/> Kunnen lopen op oneven grond                                                  |
| 4.1.58 | <b>If 'Wat is het meest bij u van toepassing ten aanzien van uw acitiviteit?' is equal to 'Geen sport, echter geen limitatie in dagelijkse activiteiten' answer this question:</b><br>Geen sport, echter geen limitatie in dagelijkse activiteiten                                   | <input type="radio"/> Geen sport, echter geen limitatie in dagelijkse activiteiten                  |
| 4.1.59 | <b>If 'Wat is het meest bij u van toepassing ten aanzien van uw acitiviteit?' is equal to 'Kunnen lopen op even grond, maar de dagelijkste activiteiten zijn gelimiteerd' answer this question:</b><br>Kunnen lopen op even grond, maar de dagelijkste activiteiten zijn gelimiteerd | <input type="radio"/> Kunnen lopen op even grond, maar de dagelijkste activiteiten zijn gelimiteerd |
| 4.1.60 | <b>If 'Wat is het meest bij u van toepassing ten aanzien van uw acitiviteit?' is equal to 'Niet kunnen lopen, fysieke handicap wegens enkelproblemen' answer this question:</b><br>Niet kunnen lopen, fysieke handicap wegens enkelproblemen                                         | <input type="radio"/> Niet kunnen lopen, fysieke handicap wegens enkelproblemen                     |

## Vragenlijst PRIMA studie 6 weken - Hoe tevreden bent u over de enkelklachten?

| Number | Question                                   | Answers                                                                                                                       |
|--------|--------------------------------------------|-------------------------------------------------------------------------------------------------------------------------------|
| 5.1    | Hoe tevreden bent u over de enkelklachten? | <input type="radio"/> Slecht<br><input type="radio"/> Matig<br><input type="radio"/> Goed<br><input type="radio"/> Uitstekend |

## Vragenlijst PRIMA studie 6 weken - SF-36

| Number | Question                                                                                                                                                                                                                                                                                                                                                           | Answers                                                                                                                                                                                                                                                                                   |
|--------|--------------------------------------------------------------------------------------------------------------------------------------------------------------------------------------------------------------------------------------------------------------------------------------------------------------------------------------------------------------------|-------------------------------------------------------------------------------------------------------------------------------------------------------------------------------------------------------------------------------------------------------------------------------------------|
|        | Deze vragenlijst gaat over uw standpunten t.a.v. uw gezondheid. Met behulp van deze gegevens kan worden bijgehouden hoe u zich voelt en hoe goed u in staat bent uw gebruikelijke bezigheden uit te voeren. Beantwoord elke vraag door een antwoord aan te klikken. Als u niet zeker weet hoe u een vraag moet beantwoorden, geef dan het best mogelijke antwoord. |                                                                                                                                                                                                                                                                                           |
| 6.1    | Hoe zou u over het algemeen uw gezondheid noemen?                                                                                                                                                                                                                                                                                                                  | <input type="radio"/> Uitstekend <input type="radio"/> Zeer goed <input type="radio"/> Goed <input type="radio"/> Matig <input type="radio"/> Slecht                                                                                                                                      |
| 6.2    | Hoe beoordeelt u nu uw gezondheid over het algemeen vergeleken met een jaar geleden?                                                                                                                                                                                                                                                                               | <input type="radio"/> Veel beter dan een jaar geleden <input type="radio"/> Wat beter dan een jaar geleden <input type="radio"/> Ongeveer hetzelfde als een jaar geleden <input type="radio"/> Wat slechter dan een jaar geleden <input type="radio"/> Veel slechter dan een jaar geleden |
| 6.3    | Wordt u door uw gezondheid op dit moment beperkt bij forse inspanning, zoals hardlopen, tillen van zware voorwerpen of een veeleisende sport beoefenen?                                                                                                                                                                                                            | <input type="radio"/> Ja, ernstig beperkt <input type="radio"/> Ja, een beetje beperkt <input type="radio"/> Nee, helemaal niet beperkt                                                                                                                                                   |
| 6.4    | Wordt u door uw gezondheid op dit moment beperkt bij matige inspanning zoals een tafel verplaatsen, stofzuigen, zwemmen of fietsen?                                                                                                                                                                                                                                | <input type="radio"/> Ja, ernstig beperkt <input type="radio"/> Ja, een beetje beperkt <input type="radio"/> Nee, helemaal niet beperkt                                                                                                                                                   |
| 6.5    | Wordt u door uw gezondheid op dit moment beperkt bij boodschappen tillen of dragen?                                                                                                                                                                                                                                                                                | <input type="radio"/> Ja, ernstig beperkt <input type="radio"/> Ja, een beetje beperkt <input type="radio"/> Nee, helemaal niet beperkt                                                                                                                                                   |
| 6.6    | Wordt u door uw gezondheid op dit moment beperkt bij een paar trappen oplopen?                                                                                                                                                                                                                                                                                     | <input type="radio"/> Ja, ernstig beperkt <input type="radio"/> Ja, een beetje beperkt <input type="radio"/> Nee, helemaal niet beperkt                                                                                                                                                   |
| 6.7    | Wordt u door uw gezondheid op dit moment beperkt bij één trap oplopen?                                                                                                                                                                                                                                                                                             | <input type="radio"/> Ja, ernstig beperkt <input type="radio"/> Ja, een beetje beperkt <input type="radio"/> Nee, helemaal niet beperkt                                                                                                                                                   |
| 6.8    | Wordt u door uw gezondheid op dit moment beperkt bij bukken, knielen of hurken?                                                                                                                                                                                                                                                                                    | <input type="radio"/> Ja, ernstig beperkt <input type="radio"/> Ja, een beetje beperkt <input type="radio"/> Nee, helemaal niet beperkt                                                                                                                                                   |
| 6.9    | Wordt u door uw gezondheid op dit moment beperkt bij meer dan één kilometer lopen?                                                                                                                                                                                                                                                                                 | <input type="radio"/> Ja, ernstig beperkt <input type="radio"/> Ja, een beetje beperkt <input type="radio"/> Nee, helemaal niet beperkt                                                                                                                                                   |
| 6.10   | Wordt u door uw gezondheid op dit moment beperkt bij een paar honderd meter lopen?                                                                                                                                                                                                                                                                                 | <input type="radio"/> Ja, ernstig beperkt <input type="radio"/> Ja, een beetje beperkt <input type="radio"/> Nee, helemaal niet beperkt                                                                                                                                                   |

- 1  
2  
3  
4  
5  
6  
7  
8  
9  
10  
11  
12  
13  
14  
15  
16  
17  
18  
19  
20  
21  
22  
23  
24  
25  
26  
27  
28  
29  
30  
31  
32  
33  
34  
35  
36  
37  
38  
39  
40  
41  
42  
43  
44  
45  
46  
47  
48  
49  
50  
51  
52  
53  
54  
55  
56  
57  
58  
59  
60
- 
- 6.11 Wordt u door uw gezondheid op dit moment beperkt bij ongeveer honderd meter lopen?  Ja, ernstig beperkt  Ja, een beetje beperkt  Nee, helemaal niet beperkt
- 
- 6.12 Wordt u door uw gezondheid op dit moment beperkt bij uzelf wassen of aankleden?  Ja, ernstig beperkt  Ja, een beetje beperkt  Nee, helemaal niet beperkt
- 
- 6.13 U besteedde in de afgelopen 4 weken minder tijd aan werk of andere bezigheden  Ja  Nee
- 
- 6.14 U heeft in de afgelopen 4 weken minder bereikt dan u zou willen  Ja  Nee
- 
- 6.15 U was in de afgelopen 4 weken beperkt in het soort werk of andere bezigheden.  Ja  Nee
- 
- 6.16 U had de afgelopen 4 weken moeite om uw werk of andere bezigheden uit te voeren (het kostte u bijvoorbeeld extra inspanning).  Ja  Nee
- 
- 6.17 U besteedde in de afgelopen 4 weken minder tijd aan werk of andere bezigheden ten gevolge van emotionele problemen  Ja  Nee
- 
- 6.18 U heeft in de afgelopen 4 weken minder bereikt dan u zou willen ten gevolge van emotionele problemen.  Ja  Nee
- 
- 6.19 U deed de afgelopen 4 weken uw werk of andere bezigheden niet zo zorgvuldig als gewoonlijk ten gevolge van emotionele problemen.  Ja  Nee
- 
- 6.20 In hoeverre hebben uw lichamelijke gezondheid of emotionele problemen u gedurende de afgelopen 4 weken gehinderd in uw normale omgang met familie, vrienden of burens, of bij activiteiten in groepsverband?  Helemaal niet  Enigszins  Nogal  Veel  Heel erg veel
- 
- 6.21 Hoeveel lichamelijke pijn heeft u de afgelopen 4 weken gehad?  Geen  Heel licht  Licht  Nogal  Ernstig  Heel ernstig
- 
- 6.22 In welke mate bent u de afgelopen 4 weken door de pijn gehinderd in uw normale werk (zowel werk buitenshuis als huishoudelijk werk)?  Helemaal niet  Een klein beetje  Nogal  Veel  Heel erg veel

1  
2 6.23 Voelde u zich levenslustig?  Altijd  
3  Meestal  
4  Vaak  
5  Soms  
6  Zelden  
7  Nooit  
8  
9  
10

---

11 6.24 Was u erg zenuwachtig?  Altijd  
12  Meestal  
13  Vaak  
14  Soms  
15  Zelden  
16  Nooit  
17  
18  
19  
20

---

21 6.25 Zat u zo in de put dat u niets kon?  Altijd  
22  Meestal  
23  Vaak  
24  Soms  
25  Zelden  
26  Nooit  
27  
28  
29  
30

---

31 6.26 Voelde u zich rustig en tevreden?  Altijd  
32  Meestal  
33  Vaak  
34  Soms  
35  Zelden  
36  Nooit  
37  
38  
39  
40

---

41 6.27 Had u veel energie?  Altijd  
42  Meestal  
43  Vaak  
44  Soms  
45  Zelden  
46  Nooit  
47  
48  
49  
50

---

51 6.28 Voelde u zich somber en neerslachtig?  Altijd  
52  Meestal  
53  Vaak  
54  Soms  
55  Zelden  
56  Nooit  
57  
58  
59  
60



1  
2  
3  
4  
5  
6  
7  
8  
9  
10  
11  
12  
13  
14  
15  
16  
17  
18  
19  
20  
21  
22  
23  
24  
25  
26  
27  
28  
29  
30  
31  
32  
33  
34  
35  
36  
37  
38  
39  
40  
41  
42  
43  
44  
45  
46  
47  
48  
49  
50  
51  
52  
53  
54  
55  
56  
57  
58  
59  
60

---

|      |                         |                                                                                                                                                                                          |
|------|-------------------------|------------------------------------------------------------------------------------------------------------------------------------------------------------------------------------------|
| 6.29 | Voelde u zich uitgeput? | <input type="radio"/> Altijd<br><input type="radio"/> Meestal<br><input type="radio"/> Vaak<br><input type="radio"/> Soms<br><input type="radio"/> Zelden<br><input type="radio"/> Nooit |
|------|-------------------------|------------------------------------------------------------------------------------------------------------------------------------------------------------------------------------------|

---

|      |                          |                                                                                                                                                                                          |
|------|--------------------------|------------------------------------------------------------------------------------------------------------------------------------------------------------------------------------------|
| 6.30 | Was u een gelukkig mens? | <input type="radio"/> Altijd<br><input type="radio"/> Meestal<br><input type="radio"/> Vaak<br><input type="radio"/> Soms<br><input type="radio"/> Zelden<br><input type="radio"/> Nooit |
|------|--------------------------|------------------------------------------------------------------------------------------------------------------------------------------------------------------------------------------|

---

|      |                    |                                                                                                                                                                                          |
|------|--------------------|------------------------------------------------------------------------------------------------------------------------------------------------------------------------------------------|
| 6.31 | Voelde u zich moe? | <input type="radio"/> Altijd<br><input type="radio"/> Meestal<br><input type="radio"/> Vaak<br><input type="radio"/> Soms<br><input type="radio"/> Zelden<br><input type="radio"/> Nooit |
|------|--------------------|------------------------------------------------------------------------------------------------------------------------------------------------------------------------------------------|

---

|      |                                                                                                                                                                                      |                                                                                                                                                            |
|------|--------------------------------------------------------------------------------------------------------------------------------------------------------------------------------------|------------------------------------------------------------------------------------------------------------------------------------------------------------|
| 6.32 | Hoe vaak hebben uw lichamelijke gezondheid of emotionele problemen u gedurende de afgelopen 4 weken gehinderd bij uw sociale activiteiten (zoals vrienden of familie bezoeken etc.)? | <input type="radio"/> Altijd<br><input type="radio"/> Meestal<br><input type="radio"/> Soms<br><input type="radio"/> Zelden<br><input type="radio"/> Nooit |
|------|--------------------------------------------------------------------------------------------------------------------------------------------------------------------------------------|------------------------------------------------------------------------------------------------------------------------------------------------------------|

---

|      |                                                            |                                                                                                                                                                                                              |
|------|------------------------------------------------------------|--------------------------------------------------------------------------------------------------------------------------------------------------------------------------------------------------------------|
| 6.33 | Ik lijk wat gemakkelijker ziek te worden dan andere mensen | <input type="radio"/> Volkomen juist<br><input type="radio"/> Grotendeels juist<br><input type="radio"/> Weet ik niet<br><input type="radio"/> Grotendeels onjuist<br><input type="radio"/> Volkomen onjuist |
|------|------------------------------------------------------------|--------------------------------------------------------------------------------------------------------------------------------------------------------------------------------------------------------------|

---

|      |                                                 |                                                                                                                                                                                                              |
|------|-------------------------------------------------|--------------------------------------------------------------------------------------------------------------------------------------------------------------------------------------------------------------|
| 6.34 | Ik ben even gezond als andere mensen die ik ken | <input type="radio"/> Volkomen juist<br><input type="radio"/> Grotendeels juist<br><input type="radio"/> Weet ik niet<br><input type="radio"/> Grotendeels onjuist<br><input type="radio"/> Volkomen onjuist |
|------|-------------------------------------------------|--------------------------------------------------------------------------------------------------------------------------------------------------------------------------------------------------------------|

- 1  
2  
3  
4  
5  
6  
7  
8  
9
- 
- 6.35 Ik verwacht dat mijn gezondheid achteruit zal gaan
- Volkomen juist
  - Grotendeels juist
  - Weet ik niet
  - Grotendeels onjuist
  - Volkomen onjuist
- 

- 10  
11  
12  
13  
14  
15  
16  
17  
18  
19  
20  
21  
22
- 6.36 Mijn gezondheid is uitstekend
- Volkomen juist
  - Grotendeels juist
  - Weet ik niet
  - Grotendeels onjuist
  - Volkomen onjuist

## Vragenlijst PRIMA studie 6 weken - GAS

| Number | Question                                                                                                                                                                                  | Answers                                                                                                                                                                                                                                                                                                                                                              |
|--------|-------------------------------------------------------------------------------------------------------------------------------------------------------------------------------------------|----------------------------------------------------------------------------------------------------------------------------------------------------------------------------------------------------------------------------------------------------------------------------------------------------------------------------------------------------------------------|
|        | Tijdens de eerste afspraak werd een duidelijk doel met u afgesproken. Dit werd tevens per email naar u gestuurd. Hoe is de situatie nu ten aanzien van de destijds gestelde doelstelling? |                                                                                                                                                                                                                                                                                                                                                                      |
| 7.1    | Wat is nu de situatie ten aanzien van het tijdens de eerste afspraak afgesproken doelstelling (Goal attainment Scaling)?                                                                  | <ul style="list-style-type: none"> <li><input type="radio"/> Achteruitgang (minder dan de uitgangssituatie)</li> <li><input type="radio"/> Uitgangssituatie</li> <li><input type="radio"/> Minder dan het doel</li> <li><input type="radio"/> Doel</li> <li><input type="radio"/> Meer dan het doel</li> <li><input type="radio"/> Veel meer dan het doel</li> </ul> |

## Vragenlijst PRIMA studie 6 weken - EQ-5D-3L

| Number | Question                                                                                                                                                                                                                                                                                                                                                           | Answers                                                                                                                                                                                                                  |
|--------|--------------------------------------------------------------------------------------------------------------------------------------------------------------------------------------------------------------------------------------------------------------------------------------------------------------------------------------------------------------------|--------------------------------------------------------------------------------------------------------------------------------------------------------------------------------------------------------------------------|
|        | Deze vragenlijst gaat over uw standpunten t.a.v. uw gezondheid. Met behulp van deze gegevens kan worden bijgehouden hoe u zich voelt en hoe goed u in staat bent uw gebruikelijke bezigheden uit te voeren. Beantwoord elke vraag door een antwoord aan te klikken. Als u niet zeker weet hoe u een vraag moet beantwoorden, geef dan het best mogelijke antwoord. |                                                                                                                                                                                                                          |
| 8.1    | Hoe is het met uw Mobiliteit gesteld?                                                                                                                                                                                                                                                                                                                              | <ul style="list-style-type: none"> <li><input type="radio"/> Ik heb geen problemen met lopen</li> <li><input type="radio"/> Ik heb enige problemen met lopen</li> <li><input type="radio"/> Ik ben bedlegerig</li> </ul> |

1  
2  
3  
4  
5  
6  
7  
8  
9

---

8.2 Hoe is het met uw Zelfzorg gesteld?

Ik heb geen problemen om mijzelf te wassen of aan te kleden

Ik heb enige problemen om mijzelf te wassen of aan te kleden

Ik ben niet in staat om mijzelf te wassen of aan te kleden

10  
11  
12  
13  
14  
15  
16  
17  
18  
19

---

8.3 Hoe is het met de Dagelijkse activiteiten (werk, studie, huishouden, gezins- en vrijetijdsactiviteiten) gesteld?

Ik heb geen problemen met mijn dagelijkse activiteiten

Ik heb enige problemen met mijn dagelijkse activiteiten

Ik ben niet in staat om mijn dagelijkse activiteiten uit te voeren

20  
21  
22  
23  
24  
25  
26

---

8.4 Hoe is het met de Pijn/klachten gesteld?

Ik heb geen pijn of andere klachten

Ik heb matige pijn of andere klachten

Ik heb zeer ernstige pijn of andere klachten

27  
28  
29  
30  
31

---

8.5 Hoe is het met de Stemming gesteld?

Ik ben niet angstig of somber

Ik ben matig angstig of somber

Ik ben erg angstig of somber

32  
33  
34  
35

We willen weten hoe goed of slecht uw gezondheid VANDAAG is. Deze meetschaal loopt van 0 tot 100: 100 staat voor de BESTE gezondheid die u zich kunt voorstellen - 0 staat voor de SLECHTSTE gezondheid die u zich kunt voorstellen

36  
37  
38  
39  
40  
41  
42

---

8.6 Uw Gezondheid vandaag (0.00) (100.00)

## Vragenlijst PRIMA studie 6 weken - AOS

43  
44  
45  
46  
47

| Number                                                                                                                                                                                                                                                                                                                                                                                                               | Question                                                   | Answers                                                                                            |
|----------------------------------------------------------------------------------------------------------------------------------------------------------------------------------------------------------------------------------------------------------------------------------------------------------------------------------------------------------------------------------------------------------------------|------------------------------------------------------------|----------------------------------------------------------------------------------------------------|
| <p>Instructies: De lijn naast elke vraag staat voor hoeveel PIJN u heeft in verschillende situaties. De linker kant (0) is "geen pijn" en de rechter kant (100) is "ergste pijn denkbaar". Geef voor de onderstaande situaties op de lijn aan hoeveel PIJN u in de afgelopen week in de enkel had. Als een of meerdere van deze situaties niet van toepassing waren, dan kiest u de "niet van toepassing" optie.</p> |                                                            |                                                                                                    |
| 9.1                                                                                                                                                                                                                                                                                                                                                                                                                  | Wat was de hoogte van de ergste pijn in de afgelopen week? | (0.00) (100.00)                                                                                    |
| 9.2                                                                                                                                                                                                                                                                                                                                                                                                                  | Heeft u pijn als u 's ochtends opstaat?                    | <input type="radio"/> Ja<br><input type="radio"/> Nee<br><input type="radio"/> Niet van toepassing |

48  
49  
50  
51  
52  
53  
54  
55  
56  
57  
58  
59  
60

|    |       |                                                                                                                     |                                           |
|----|-------|---------------------------------------------------------------------------------------------------------------------|-------------------------------------------|
| 1  |       |                                                                                                                     |                                           |
| 2  | 9.2.1 | <b><i>If 'Heeft u pijn als u 's ochtends opstaat?' is equal to 'Ja' answer this question:</i></b>                   | (0.00) (100.00)                           |
| 3  |       |                                                                                                                     |                                           |
| 4  |       | Hoeveel pijn heeft u voordat u 's ochtends opstaat?                                                                 |                                           |
| 5  |       |                                                                                                                     |                                           |
| 6  | 9.3   | Heeft u pijn wanneer u op blote voeten loopt?                                                                       | <input type="radio"/> Ja                  |
| 7  |       |                                                                                                                     | <input type="radio"/> Nee                 |
| 8  |       |                                                                                                                     | <input type="radio"/> Niet van toepassing |
| 9  |       |                                                                                                                     |                                           |
| 10 |       |                                                                                                                     |                                           |
| 11 |       |                                                                                                                     |                                           |
| 12 | 9.3.1 | <b><i>If 'Heeft u pijn wanneer u op blote voeten loopt?' is equal to 'Ja' answer this question:</i></b>             | (0.00) (100.00)                           |
| 13 |       |                                                                                                                     |                                           |
| 14 |       | Hoeveel pijn heeft u als u op blote voeten loopt?                                                                   |                                           |
| 15 |       |                                                                                                                     |                                           |
| 16 | 9.4   | Heeft u pijn wanneer u op blote voeten staat?                                                                       | <input type="radio"/> Ja                  |
| 17 |       |                                                                                                                     | <input type="radio"/> Nee                 |
| 18 |       |                                                                                                                     | <input type="radio"/> Niet van toepassing |
| 19 |       |                                                                                                                     |                                           |
| 20 |       |                                                                                                                     |                                           |
| 21 |       |                                                                                                                     |                                           |
| 22 | 9.4.1 | <b><i>If 'Heeft u pijn wanneer u op blote voeten staat?' is equal to 'Ja' answer this question:</i></b>             | (0.00) (100.00)                           |
| 23 |       |                                                                                                                     |                                           |
| 24 |       | Hoeveel pijn heeft u als u op blote voeten staat?                                                                   |                                           |
| 25 |       |                                                                                                                     |                                           |
| 26 | 9.5   | Heeft u pijn wanneer u met schoenen loopt?                                                                          | <input type="radio"/> Ja                  |
| 27 |       |                                                                                                                     | <input type="radio"/> Nee                 |
| 28 |       |                                                                                                                     | <input type="radio"/> Niet van toepassing |
| 29 |       |                                                                                                                     |                                           |
| 30 |       |                                                                                                                     |                                           |
| 31 |       |                                                                                                                     |                                           |
| 32 | 9.5.1 | <b><i>If 'Heeft u pijn wanneer u met schoenen loopt?' is equal to 'Ja' answer this question:</i></b>                | (0.00) (100.00)                           |
| 33 |       |                                                                                                                     |                                           |
| 34 |       | Hoeveel pijn heeft u wanneer u met schoenen loopt?                                                                  |                                           |
| 35 |       |                                                                                                                     |                                           |
| 36 | 9.6   | Heeft u pijn wanneer u met schoenen staat?                                                                          | <input type="radio"/> Ja                  |
| 37 |       |                                                                                                                     | <input type="radio"/> Nee                 |
| 38 |       |                                                                                                                     | <input type="radio"/> Niet van toepassing |
| 39 |       |                                                                                                                     |                                           |
| 40 |       |                                                                                                                     |                                           |
| 41 |       |                                                                                                                     |                                           |
| 42 | 9.6.1 | <b><i>If 'Heeft u pijn wanneer u met schoenen staat?' is equal to 'Ja' answer this question:</i></b>                | (0.00) (100.00)                           |
| 43 |       |                                                                                                                     |                                           |
| 44 |       | Hoeveel pijn heeft u wanneer u met schoenen staat?                                                                  |                                           |
| 45 |       |                                                                                                                     |                                           |
| 46 | 9.7   | Heeft u pijn wanneer u loopt met steunzolen of een brace?                                                           | <input type="radio"/> Ja                  |
| 47 |       |                                                                                                                     | <input type="radio"/> Nee                 |
| 48 |       |                                                                                                                     | <input type="radio"/> Niet van toepassing |
| 49 |       |                                                                                                                     |                                           |
| 50 |       |                                                                                                                     |                                           |
| 51 |       |                                                                                                                     |                                           |
| 52 | 9.7.1 | <b><i>If 'Heeft u pijn wanneer u loopt met steunzolen of een brace?' is equal to 'Ja' answer this question:</i></b> | (0.00) (100.00)                           |
| 53 |       |                                                                                                                     |                                           |
| 54 |       | Hoeveel pijn heeft u wanneer u loopt met steunzolen of een brace?                                                   |                                           |
| 55 |       |                                                                                                                     |                                           |
| 56 |       |                                                                                                                     |                                           |
| 57 |       |                                                                                                                     |                                           |
| 58 |       |                                                                                                                     |                                           |
| 59 |       |                                                                                                                     |                                           |
| 60 |       |                                                                                                                     |                                           |

|    |        |                                                                                                                                                                                                                                                                                                                                                                                                                                               |                                                                                                    |          |
|----|--------|-----------------------------------------------------------------------------------------------------------------------------------------------------------------------------------------------------------------------------------------------------------------------------------------------------------------------------------------------------------------------------------------------------------------------------------------------|----------------------------------------------------------------------------------------------------|----------|
| 1  |        |                                                                                                                                                                                                                                                                                                                                                                                                                                               |                                                                                                    |          |
| 2  | 9.8    | Heeft u pijn wanneer u staat met steunzolen of een brace?                                                                                                                                                                                                                                                                                                                                                                                     | <input type="radio"/> Ja<br><input type="radio"/> Nee<br><input type="radio"/> Niet van toepassing |          |
| 3  |        |                                                                                                                                                                                                                                                                                                                                                                                                                                               |                                                                                                    |          |
| 4  |        |                                                                                                                                                                                                                                                                                                                                                                                                                                               |                                                                                                    |          |
| 5  |        |                                                                                                                                                                                                                                                                                                                                                                                                                                               |                                                                                                    |          |
| 6  |        |                                                                                                                                                                                                                                                                                                                                                                                                                                               |                                                                                                    |          |
| 7  |        |                                                                                                                                                                                                                                                                                                                                                                                                                                               |                                                                                                    |          |
| 8  | 9.8.1  | <b>If 'Heeft u pijn wanneer u staat met steunzolen of een brace?' is equal to 'Ja' answer this question:</b>                                                                                                                                                                                                                                                                                                                                  | (0.00)                                                                                             | (100.00) |
| 9  |        | Hoeveel pijn heeft u wanneer u staat met steunzolen of een brace?                                                                                                                                                                                                                                                                                                                                                                             |                                                                                                    |          |
| 10 |        |                                                                                                                                                                                                                                                                                                                                                                                                                                               |                                                                                                    |          |
| 11 |        |                                                                                                                                                                                                                                                                                                                                                                                                                                               |                                                                                                    |          |
| 12 |        |                                                                                                                                                                                                                                                                                                                                                                                                                                               |                                                                                                    |          |
| 13 | 9.9    | Heeft u pijn aan het einde van de dag?                                                                                                                                                                                                                                                                                                                                                                                                        | <input type="radio"/> Ja<br><input type="radio"/> Nee<br><input type="radio"/> Niet van toepassing |          |
| 14 |        |                                                                                                                                                                                                                                                                                                                                                                                                                                               |                                                                                                    |          |
| 15 |        |                                                                                                                                                                                                                                                                                                                                                                                                                                               |                                                                                                    |          |
| 16 |        |                                                                                                                                                                                                                                                                                                                                                                                                                                               |                                                                                                    |          |
| 17 |        |                                                                                                                                                                                                                                                                                                                                                                                                                                               |                                                                                                    |          |
| 18 |        |                                                                                                                                                                                                                                                                                                                                                                                                                                               |                                                                                                    |          |
| 19 | 9.9.1  | <b>If 'Heeft u pijn aan het einde van de dag?' is equal to 'Ja' answer this question:</b>                                                                                                                                                                                                                                                                                                                                                     | (0.00)                                                                                             | (100.00) |
| 20 |        | Hoeveel pijn heeft u aan het einde van de dag?                                                                                                                                                                                                                                                                                                                                                                                                |                                                                                                    |          |
| 21 |        |                                                                                                                                                                                                                                                                                                                                                                                                                                               |                                                                                                    |          |
| 22 |        |                                                                                                                                                                                                                                                                                                                                                                                                                                               |                                                                                                    |          |
| 23 |        | Instructies:De lijn naast elke vraag staat voor hoeveel MOEITE u heeft met verschillende activiteiten. De linker kant (0) is "Niet moeilijk" en de rechter kant (100) is "Te moeilijk, niet uitvoerbaar". Geef voor de onderstaande activiteiten op de lijn aan hoeveel MOEITE u in de afgelopen week door enkelklachten had met onderstaande activiteiten. Als een situatie niet van toepassing is, kies dan de optie "niet van toepassing". |                                                                                                    |          |
| 24 |        |                                                                                                                                                                                                                                                                                                                                                                                                                                               |                                                                                                    |          |
| 25 |        |                                                                                                                                                                                                                                                                                                                                                                                                                                               |                                                                                                    |          |
| 26 |        |                                                                                                                                                                                                                                                                                                                                                                                                                                               |                                                                                                    |          |
| 27 |        |                                                                                                                                                                                                                                                                                                                                                                                                                                               |                                                                                                    |          |
| 28 |        |                                                                                                                                                                                                                                                                                                                                                                                                                                               |                                                                                                    |          |
| 29 |        |                                                                                                                                                                                                                                                                                                                                                                                                                                               |                                                                                                    |          |
| 30 | 9.10   | Heeft u moeite met door het huis lopen?                                                                                                                                                                                                                                                                                                                                                                                                       | <input type="radio"/> Ja<br><input type="radio"/> Nee<br><input type="radio"/> Niet van toepassing |          |
| 31 |        |                                                                                                                                                                                                                                                                                                                                                                                                                                               |                                                                                                    |          |
| 32 |        |                                                                                                                                                                                                                                                                                                                                                                                                                                               |                                                                                                    |          |
| 33 |        |                                                                                                                                                                                                                                                                                                                                                                                                                                               |                                                                                                    |          |
| 34 |        |                                                                                                                                                                                                                                                                                                                                                                                                                                               |                                                                                                    |          |
| 35 | 9.10.1 | <b>If 'Heeft u moeite met door het huis lopen?' is equal to 'Ja' answer this question:</b>                                                                                                                                                                                                                                                                                                                                                    | (0.00)                                                                                             | (100.00) |
| 36 |        | Hoeveel moeite heeft u met door het huis lopen?                                                                                                                                                                                                                                                                                                                                                                                               |                                                                                                    |          |
| 37 |        |                                                                                                                                                                                                                                                                                                                                                                                                                                               |                                                                                                    |          |
| 38 |        |                                                                                                                                                                                                                                                                                                                                                                                                                                               |                                                                                                    |          |
| 39 |        |                                                                                                                                                                                                                                                                                                                                                                                                                                               |                                                                                                    |          |
| 40 | 9.11   | Heeft u moeite met buiten lopen op oneven ondergrond?                                                                                                                                                                                                                                                                                                                                                                                         | <input type="radio"/> Ja<br><input type="radio"/> Nee<br><input type="radio"/> Niet van toepassing |          |
| 41 |        |                                                                                                                                                                                                                                                                                                                                                                                                                                               |                                                                                                    |          |
| 42 |        |                                                                                                                                                                                                                                                                                                                                                                                                                                               |                                                                                                    |          |
| 43 |        |                                                                                                                                                                                                                                                                                                                                                                                                                                               |                                                                                                    |          |
| 44 |        |                                                                                                                                                                                                                                                                                                                                                                                                                                               |                                                                                                    |          |
| 45 | 9.11.1 | <b>If 'Heeft u moeite met buiten lopen op oneven ondergrond?' is equal to 'Ja' answer this question:</b>                                                                                                                                                                                                                                                                                                                                      | (0.00)                                                                                             | (100.00) |
| 46 |        | Hoeveel moeite heeft u met buiten lopen op oneven ondergrond?                                                                                                                                                                                                                                                                                                                                                                                 |                                                                                                    |          |
| 47 |        |                                                                                                                                                                                                                                                                                                                                                                                                                                               |                                                                                                    |          |
| 48 |        |                                                                                                                                                                                                                                                                                                                                                                                                                                               |                                                                                                    |          |
| 49 |        |                                                                                                                                                                                                                                                                                                                                                                                                                                               |                                                                                                    |          |
| 50 |        |                                                                                                                                                                                                                                                                                                                                                                                                                                               |                                                                                                    |          |
| 51 | 9.12   | Heeft u moeite met een paar honderd meter lopen?                                                                                                                                                                                                                                                                                                                                                                                              | <input type="radio"/> Ja<br><input type="radio"/> Nee<br><input type="radio"/> Niet van toepassing |          |
| 52 |        |                                                                                                                                                                                                                                                                                                                                                                                                                                               |                                                                                                    |          |
| 53 |        |                                                                                                                                                                                                                                                                                                                                                                                                                                               |                                                                                                    |          |
| 54 |        |                                                                                                                                                                                                                                                                                                                                                                                                                                               |                                                                                                    |          |
| 55 |        |                                                                                                                                                                                                                                                                                                                                                                                                                                               |                                                                                                    |          |
| 56 | 9.12.1 | <b>If 'Heeft u moeite met een paar honderd meter lopen?' is equal to 'Ja' answer this question:</b>                                                                                                                                                                                                                                                                                                                                           | (0.00)                                                                                             | (100.00) |
| 57 |        | Hoeveel moeite heeft u met een paar honderd meter lopen?                                                                                                                                                                                                                                                                                                                                                                                      |                                                                                                    |          |
| 58 |        |                                                                                                                                                                                                                                                                                                                                                                                                                                               |                                                                                                    |          |
| 59 |        |                                                                                                                                                                                                                                                                                                                                                                                                                                               |                                                                                                    |          |
| 60 |        |                                                                                                                                                                                                                                                                                                                                                                                                                                               |                                                                                                    |          |

|    |        |                                                                                                             |                                           |          |
|----|--------|-------------------------------------------------------------------------------------------------------------|-------------------------------------------|----------|
| 1  |        |                                                                                                             |                                           |          |
| 2  | 9.13   | Heeft u moeite met een trap oplopen?                                                                        | <input type="radio"/> Ja                  |          |
| 3  |        |                                                                                                             | <input type="radio"/> Nee                 |          |
| 4  |        |                                                                                                             | <input type="radio"/> Niet van toepassing |          |
| 5  |        |                                                                                                             |                                           |          |
| 6  |        |                                                                                                             |                                           |          |
| 7  |        |                                                                                                             |                                           |          |
| 8  | 9.13.1 | <b>If 'Heeft u moeite met een trap oplopen?' is equal to 'Ja' answer this question:</b>                     | (0.00)                                    | (100.00) |
| 9  |        | Hoeveel moeite heeft u met een trap oplopen?                                                                |                                           |          |
| 10 |        |                                                                                                             |                                           |          |
| 11 |        |                                                                                                             |                                           |          |
| 12 | 9.14   | Heeft u moeite met een trap aflopen?                                                                        | <input type="radio"/> Ja                  |          |
| 13 |        |                                                                                                             | <input type="radio"/> Nee                 |          |
| 14 |        |                                                                                                             | <input type="radio"/> Niet van toepassing |          |
| 15 |        |                                                                                                             |                                           |          |
| 16 |        |                                                                                                             |                                           |          |
| 17 |        |                                                                                                             |                                           |          |
| 18 | 9.14.1 | <b>If 'Heeft u moeite met een trap aflopen?' is equal to 'Ja' answer this question:</b>                     | (0.00)                                    | (100.00) |
| 19 |        | Hoeveel moeite heeft u met een trap aflopen?                                                                |                                           |          |
| 20 |        |                                                                                                             |                                           |          |
| 21 |        |                                                                                                             |                                           |          |
| 22 | 9.15   | Heeft u moeite met op de tenen staan?                                                                       | <input type="radio"/> Ja                  |          |
| 23 |        |                                                                                                             | <input type="radio"/> Nee                 |          |
| 24 |        |                                                                                                             | <input type="radio"/> Niet van toepassing |          |
| 25 |        |                                                                                                             |                                           |          |
| 26 |        |                                                                                                             |                                           |          |
| 27 |        |                                                                                                             |                                           |          |
| 28 | 9.15.1 | <b>If 'Heeft u moeite met op de tenen staan?' is equal to 'Ja' answer this question:</b>                    | (0.00)                                    | (100.00) |
| 29 |        | Hoeveel moeite heeft u met op de tenen staan?                                                               |                                           |          |
| 30 |        |                                                                                                             |                                           |          |
| 31 |        |                                                                                                             |                                           |          |
| 32 | 9.16   | Heeft u moeite met opstaan uit de stoel?                                                                    | <input type="radio"/> Ja                  |          |
| 33 |        |                                                                                                             | <input type="radio"/> Nee                 |          |
| 34 |        |                                                                                                             | <input type="radio"/> Niet van toepassing |          |
| 35 |        |                                                                                                             |                                           |          |
| 36 |        |                                                                                                             |                                           |          |
| 37 |        |                                                                                                             |                                           |          |
| 38 | 9.16.1 | <b>If 'Heeft u moeite met opstaan uit de stoel?' is equal to 'Ja' answer this question:</b>                 | (0.00)                                    | (100.00) |
| 39 |        | Hoeveel moeite heeft u met opstaan uit de stoel?                                                            |                                           |          |
| 40 |        |                                                                                                             |                                           |          |
| 41 |        |                                                                                                             |                                           |          |
| 42 | 9.17   | Heeft u moeite met het op- of afstappen van stoepranden?                                                    | <input type="radio"/> Ja                  |          |
| 43 |        |                                                                                                             | <input type="radio"/> Nee                 |          |
| 44 |        |                                                                                                             | <input type="radio"/> Niet van toepassing |          |
| 45 |        |                                                                                                             |                                           |          |
| 46 |        |                                                                                                             |                                           |          |
| 47 |        |                                                                                                             |                                           |          |
| 48 | 9.17.1 | <b>If 'Heeft u moeite met het op- of afstappen van stoepranden?' is equal to 'Ja' answer this question:</b> | (0.00)                                    | (100.00) |
| 49 |        | Hoeveel moeite heeft u met het op- of afstappen van stoepranden?                                            |                                           |          |
| 50 |        |                                                                                                             |                                           |          |
| 51 |        |                                                                                                             |                                           |          |
| 52 |        |                                                                                                             |                                           |          |
| 53 |        |                                                                                                             |                                           |          |
| 54 | 9.18   | Heeft u moeite met snel lopen of rennen?                                                                    | <input type="radio"/> Ja                  |          |
| 55 |        |                                                                                                             | <input type="radio"/> Nee                 |          |
| 56 |        |                                                                                                             | <input type="radio"/> Niet van toepassing |          |
| 57 |        |                                                                                                             |                                           |          |
| 58 |        |                                                                                                             |                                           |          |
| 59 |        |                                                                                                             |                                           |          |
| 60 |        |                                                                                                             |                                           |          |

9.18.1 ***If 'Heeft u moeite met snel lopen of rennen?' is equal to 'Ja' answer this question:*** (0.00) (100.00)  
 Hoeveel moeite heeft u met snel lopen of rennen?

## Vragenlijst PRIMA studie 6 weken - FAOS

| Number | Question                                                                                                                                                                                                                                                                                                                                                                                                                                                                                                                                                                            | Answers                                                                                                                                                    |
|--------|-------------------------------------------------------------------------------------------------------------------------------------------------------------------------------------------------------------------------------------------------------------------------------------------------------------------------------------------------------------------------------------------------------------------------------------------------------------------------------------------------------------------------------------------------------------------------------------|------------------------------------------------------------------------------------------------------------------------------------------------------------|
|        | Deze lijst vraagt naar uw mening over uw voet/enkel. Uw antwoorden geven ons een beeld van uw voet/enkel klachten en hoe u in staat bent om alledaagse activiteiten uit te voeren in uw huidige situatie. Beantwoorden van een vraag doet u door het aanklikken van een vakje met het volgens u meest juiste antwoord (één vakje per vraag). Als u niet zeker weet hoe u een vraag moet beantwoorden, geeft u dan het antwoord dat volgens u het meest op uw situatie van toepassing is. Deze vraag heeft betrekking op het voorkomen van voet/enkel klachten in de afgelopen week. |                                                                                                                                                            |
| 10.1   | Is uw voet/enkel gezwollen?                                                                                                                                                                                                                                                                                                                                                                                                                                                                                                                                                         | <input type="radio"/> Nooit <input type="radio"/> Zelden <input type="radio"/> Soms <input type="radio"/> Vaak <input type="radio"/> Altijd                |
| 10.2   | Voelt u gekraak of hoort u klikken of een ander vreemd geluid wanneer u de voet/enkel beweegt?                                                                                                                                                                                                                                                                                                                                                                                                                                                                                      | <input type="radio"/> Nooit <input type="radio"/> Zelden <input type="radio"/> Soms <input type="radio"/> Vaak <input type="radio"/> Altijd                |
| 10.3   | Hapert uw enkel of blokkeert uw enkel ('op slot' gaan zitten) wanneer u deze beweegt?                                                                                                                                                                                                                                                                                                                                                                                                                                                                                               | <input type="radio"/> Nooit <input type="radio"/> Zelden <input type="radio"/> Soms <input type="radio"/> Vaak <input type="radio"/> Altijd                |
| 10.4   | Kunt u de voet/enkel volledig strekken?                                                                                                                                                                                                                                                                                                                                                                                                                                                                                                                                             | <input type="radio"/> Altijd <input type="radio"/> Vaak <input type="radio"/> Soms <input type="radio"/> Zelden <input type="radio"/> Nooit                |
| 10.5   | Kunt u de voet volledig naar u toe buigen?                                                                                                                                                                                                                                                                                                                                                                                                                                                                                                                                          | <input type="radio"/> Altijd <input type="radio"/> Vaak <input type="radio"/> Soms <input type="radio"/> Zelden <input type="radio"/> Nooit                |
| 10.6   | In welke mate heeft u een stijf gevoel in de voet/enkel 's ochtends bij het wakker worden?                                                                                                                                                                                                                                                                                                                                                                                                                                                                                          | <input type="radio"/> Niet Ernstig <input type="radio"/> Mild <input type="radio"/> Matig <input type="radio"/> Zeer ernstig                               |
| 10.7   | In welke mate heeft u een stijf gevoel in de voet/enkel na zitten, liggen of rusten later op de dag?                                                                                                                                                                                                                                                                                                                                                                                                                                                                                | <input type="radio"/> Niet Ernstig <input type="radio"/> Mild <input type="radio"/> Matig <input type="radio"/> Zeer ernstig                               |
| 10.8   | Hoe vaak heeft u pijn in uw voet/enkel?                                                                                                                                                                                                                                                                                                                                                                                                                                                                                                                                             | <input type="radio"/> Nooit <input type="radio"/> Maandelijks <input type="radio"/> Wekelijks <input type="radio"/> Dagelijks <input type="radio"/> Altijd |

1  
2  
3  
4  
5  
6  
7  
8  
9

---

10.9 Hoeveel voet/enkel pijn heeft u gehad in de afgelopen week bij draaien als uw voet/enkel op de grond staat?

Geen  
 Mild  
 Matig  
 Ernstig  
 Zeer ernstig

---

10  
11  
12  
13  
14  
15  
16  
17  
18

---

10.10 Hoeveel voet/enkel pijn heeft u gehad in de afgelopen week bij het volledig uitstrekken van de voet/enkel?

Geen  
 Mild  
 Matig  
 Ernstig  
 Zeer ernstig

---

19  
20  
21  
22  
23  
24  
25  
26

---

10.11 Hoeveel voet/enkel pijn heeft u gehad in de afgelopen week bij het volledig naar u toe buigen/optrekken van de voet/enkel

Geen  
 Mild  
 Matig  
 Ernstig  
 Zeer ernstig

---

27  
28  
29  
30  
31  
32  
33  
34

---

10.12 Hoeveel voet/enkel pijn heeft u gehad in de afgelopen week bij het lopen op een vlakke ondergrond

Geen  
 Mild  
 Matig  
 Ernstig  
 Zeer ernstig

---

35  
36  
37  
38  
39  
40  
41  
42  
43

---

10.13 Hoeveel voet/enkel pijn heeft u gehad in de afgelopen week bij het trap op- en trap af lopen?

Geen  
 Mild  
 Matig  
 Ernstig  
 Zeer ernstig

---

44  
45  
46  
47  
48  
49  
50  
51

---

10.14 Hoeveel voet/enkel pijn heeft u gehad in de afgelopen week 's nachts in bed?

Geen  
 Mild  
 Matig  
 Ernstig  
 Zeer ernstig

---

52  
53  
54  
55  
56  
57  
58  
59  
60

---

10.15 Hoeveel voet/enkel pijn heeft u gehad in de afgelopen week bij het zitten of liggen?

Geen  
 Mild  
 Matig  
 Ernstig  
 Zeer ernstig



1  
2  
3  
4  
5  
6  
7  
8  
9  
10  
11  
12  
13  
14  
15  
16  
17  
18  
19  
20  
21  
22  
23  
24  
25  
26  
27  
28  
29  
30  
31  
32  
33  
34  
35  
36  
37  
38  
39  
40  
41  
42  
43  
44  
45  
46  
47  
48  
49  
50  
51  
52  
53  
54  
55  
56  
57  
58  
59  
60

|       |                                                                                                                        |                                    |                            |                             |                                    |                                    |
|-------|------------------------------------------------------------------------------------------------------------------------|------------------------------------|----------------------------|-----------------------------|------------------------------------|------------------------------------|
| 10.16 | Hoeveel voet/enkel pijn heeft u gehad in de afgelopen week bij het rechtop staan?                                      | <input type="radio"/> Geen         | <input type="radio"/> Mild | <input type="radio"/> Matig | <input type="radio"/> Ernstig      | <input type="radio"/> Zeer ernstig |
| 10.17 | In welke mate werd u gehinderd bij het trap aflopen?                                                                   | <input type="radio"/> Niet Ernstig | <input type="radio"/> Mild | <input type="radio"/> Matig | <input type="radio"/> Zeer ernstig | <input type="radio"/>              |
| 10.18 | In welke mate werd u gehinderd bij het trap op lopen?                                                                  | <input type="radio"/> Niet Ernstig | <input type="radio"/> Mild | <input type="radio"/> Matig | <input type="radio"/> Zeer ernstig | <input type="radio"/>              |
| 10.19 | In welke mate werd u gehinderd als u vanuit een zittende positie ging staan?                                           | <input type="radio"/> Niet Ernstig | <input type="radio"/> Mild | <input type="radio"/> Matig | <input type="radio"/> Zeer ernstig | <input type="radio"/>              |
| 10.20 | In welke mate werd u gehinderd bij het staan?                                                                          | <input type="radio"/> Niet Ernstig | <input type="radio"/> Mild | <input type="radio"/> Matig | <input type="radio"/> Zeer ernstig | <input type="radio"/>              |
| 10.21 | In welke mate werd u gehinderd bij het naar de grond buigen/iets oprapen?                                              | <input type="radio"/> Niet Ernstig | <input type="radio"/> Mild | <input type="radio"/> Matig | <input type="radio"/> Zeer ernstig | <input type="radio"/>              |
| 10.22 | In welke mate werd u gehinderd bij het lopen op een vlakke ondergrond?                                                 | <input type="radio"/> Niet Ernstig | <input type="radio"/> Mild | <input type="radio"/> Matig | <input type="radio"/> Zeer ernstig | <input type="radio"/>              |
| 10.23 | In welke mate werd u gehinderd bij het in- en uit de auto stappen?                                                     | <input type="radio"/> Niet Ernstig | <input type="radio"/> Mild | <input type="radio"/> Matig | <input type="radio"/> Zeer ernstig | <input type="radio"/>              |
| 10.24 | In welke mate werd u gehinderd bij het boodschappen doen?                                                              | <input type="radio"/> Niet Ernstig | <input type="radio"/> Mild | <input type="radio"/> Matig | <input type="radio"/> Zeer ernstig | <input type="radio"/>              |
| 10.25 | In welke mate werd u gehinderd bij sokken/panty's aantrekken?                                                          | <input type="radio"/> Niet Ernstig | <input type="radio"/> Mild | <input type="radio"/> Matig | <input type="radio"/> Zeer ernstig | <input type="radio"/>              |
| 10.26 | In welke mate werd u gehinderd bij het opstaan uit bed?                                                                | <input type="radio"/> Niet Ernstig | <input type="radio"/> Mild | <input type="radio"/> Matig | <input type="radio"/> Zeer ernstig | <input type="radio"/>              |
| 10.27 | In welke mate werd u gehinderd bij het sokken uittrekken?                                                              | <input type="radio"/> Niet Ernstig | <input type="radio"/> Mild | <input type="radio"/> Matig | <input type="radio"/> Zeer ernstig | <input type="radio"/>              |
| 10.28 | In welke mate werd u gehinderd bij het in bed liggen (omdraaien, lange tijd uw voet/enkel in dezelfde positie houden)? | <input type="radio"/> Niet Ernstig | <input type="radio"/> Mild | <input type="radio"/> Matig | <input type="radio"/> Zeer ernstig | <input type="radio"/>              |

|       |                                                                                                                  |                                                                                                                                                                    |                                                                      |                             |                              |
|-------|------------------------------------------------------------------------------------------------------------------|--------------------------------------------------------------------------------------------------------------------------------------------------------------------|----------------------------------------------------------------------|-----------------------------|------------------------------|
| 10.29 | In welke mate werd u gehinderd bij het in/uit bad stappen?                                                       | <input type="radio"/> Niet<br>Ernstig                                                                                                                              | <input type="radio"/> Mild<br><input type="radio"/> Zeer ernstig     | <input type="radio"/> Matig | <input type="radio"/>        |
| 10.30 | In welke mate werd u gehinderd bij zitten?                                                                       | <input type="radio"/> Niet<br>Ernstig                                                                                                                              | <input type="radio"/> Mild<br><input type="radio"/> Zeer ernstig     | <input type="radio"/> Matig | <input type="radio"/>        |
| 10.31 | In welke mate werd u gehinderd bij het toilet op en af gaan?                                                     | <input type="radio"/> Niet<br>Ernstig                                                                                                                              | <input type="radio"/> Mild<br><input type="radio"/> Zeer ernstig     | <input type="radio"/> Matig | <input type="radio"/>        |
| 10.32 | In welke mate werd u gehinderd bij zwaar huishoudelijk werk (bijvoorbeeld zware dozen sjouwen, vloer schrobben)? | <input type="radio"/> Niet<br>Ernstig                                                                                                                              | <input type="radio"/> Mild<br><input type="radio"/> Zeer ernstig     | <input type="radio"/> Matig | <input type="radio"/>        |
| 10.33 | In welke mate werd u gehinderd bij licht huishoudelijk werk (bijvoorbeeld koken, afstoffen)?                     | <input type="radio"/> Niet<br>Ernstig                                                                                                                              | <input type="radio"/> Mild<br><input type="radio"/> Zeer ernstig     | <input type="radio"/> Matig | <input type="radio"/>        |
| 10.34 | In welke mate werd u gehinderd bij hurken?                                                                       | <input type="radio"/> Niet<br>Ernstig                                                                                                                              | <input type="radio"/> Mild<br><input type="radio"/> Zeer ernstig     | <input type="radio"/> Matig | <input type="radio"/>        |
| 10.35 | In welke mate werd u gehinderd bij hardlopen?                                                                    | <input type="radio"/> Niet<br>Ernstig                                                                                                                              | <input type="radio"/> Mild<br><input type="radio"/> Zeer ernstig     | <input type="radio"/> Matig | <input type="radio"/>        |
| 10.36 | In welke mate werd u gehinderd bij springen?                                                                     | <input type="radio"/> Niet<br>Ernstig                                                                                                                              | <input type="radio"/> Mild<br><input type="radio"/> Zeer ernstig     | <input type="radio"/> Matig | <input type="radio"/>        |
| 10.37 | In welke mate werd u gehinderd bij ronddraaien op uw aangedane voet/enkel?                                       | <input type="radio"/> Niet<br>Ernstig                                                                                                                              | <input type="radio"/> Mild<br><input type="radio"/> Zeer ernstig     | <input type="radio"/> Matig | <input type="radio"/>        |
| 10.38 | In welke mate werd u gehinderd bij knielen?                                                                      | <input type="radio"/> Niet<br>Ernstig                                                                                                                              | <input type="radio"/> Mild<br><input type="radio"/> Zeer ernstig     | <input type="radio"/> Matig | <input type="radio"/>        |
| 10.39 | Hoe vaak bent u zich bewust van uw voet/enkel probleem?                                                          | <input type="radio"/> Nooit<br>Wekelijks                                                                                                                           | <input type="radio"/> Maandelijks<br><input type="radio"/> Dagelijks | <input type="radio"/>       | <input type="radio"/> Altijd |
| 10.40 | Heeft u uw leven veranderd om activiteiten te vermijden die schadelijk kunnen zijn voor uw voet/enkel?           | <input type="radio"/> Niet<br><input type="radio"/> Enigszins<br><input type="radio"/> Matig<br><input type="radio"/> Behoorlijk<br><input type="radio"/> Volledig |                                                                      |                             |                              |

1  
2  
3  
4  
5  
6  
7  
8  
9  
10  
11  
12  
13  
14  
15  
16  
17  
18  
19  
20  
21  
22  
23  
24  
25  
26  
27  
28  
29  
30  
31  
32  
33  
34  
35  
36  
37  
38  
39  
40  
41  
42  
43  
44  
45  
46  
47  
48  
49  
50  
51  
52  
53  
54  
55  
56  
57  
58  
59  
60

---

10.41 In hoeverre kunt u op uw voet/enkel vertrouwen?

Volledig

Behoorlijk

Matig

Enigzins

Niet

---

10.42 In het algemeen, in welke mate ondervindt u hinder van uw voet/enkel

Geen

Mild

Matig

Ernstig

Zeer ernstig

## Vragenlijst PRIMA studie 6 weken - Dank

| Number | Question                                                                                                                                      | Answers                                                                  |
|--------|-----------------------------------------------------------------------------------------------------------------------------------------------|--------------------------------------------------------------------------|
| 11.1   | Hartelijk dank voor de tijd die u heeft genomen om de vragenlijsten in te vullen. Indien u nog opmerkingen heeft kunt u deze hierin plaatsen. | <div style="border: 1px dashed black; height: 60px; width: 100%;"></div> |

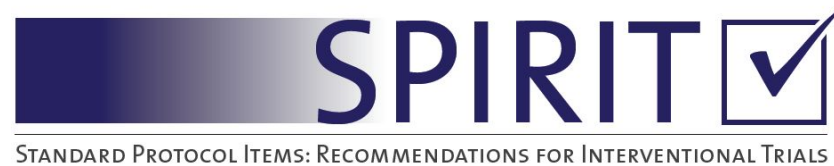

SPIRIT 2013 Checklist: Recommended items to address in a clinical trial protocol and related documents\*

| Section/item                      | Item No | Description                                                                                                                                                                                                                                                                              | Addressed on page number |
|-----------------------------------|---------|------------------------------------------------------------------------------------------------------------------------------------------------------------------------------------------------------------------------------------------------------------------------------------------|--------------------------|
| <b>Administrative information</b> |         |                                                                                                                                                                                                                                                                                          |                          |
| Title                             | 1       | Descriptive title identifying the study design, population, interventions, and, if applicable, trial acronym                                                                                                                                                                             | Page 1, line 1-4         |
| Trial registration                | 2a      | Trial identifier and registry name. If not yet registered, name of intended registry                                                                                                                                                                                                     | Page 2, line 64-65       |
|                                   | 2b      | All items from the World Health Organization Trial Registration Data Set                                                                                                                                                                                                                 | Page 20, line 416-417    |
| Protocol version                  | 3       | Date and version identifier                                                                                                                                                                                                                                                              | Every page at the bottom |
| Funding                           | 4       | Sources and types of financial, material, and other support                                                                                                                                                                                                                              | Page 23, Line 493-498    |
| Roles and responsibilities        | 5a      | Names, affiliations, and roles of protocol contributors                                                                                                                                                                                                                                  | Page 1, Line 5-28        |
|                                   | 5b      | Name and contact information for the trial sponsor                                                                                                                                                                                                                                       | Page 1, Line 33-39       |
|                                   | 5c      | Role of study sponsor and funders, if any, in study design; collection, management, analysis, and interpretation of data; writing of the report; and the decision to submit the report for publication, including whether they will have ultimate authority over any of these activities | Page 23, Line 493-498    |

1  
2  
3  
4  
5  
6  
7  
8  
9  
10  
11  
12  
13  
14  
15  
16  
17  
18  
19  
20  
21  
22  
23  
24  
25  
26  
27  
28  
29  
30  
31  
32  
33  
34  
35  
36  
37  
38  
39  
40  
41  
42  
43  
44  
45  
46

|                                                           |     |                                                                                                                                                                                                                                                                  |                                            |
|-----------------------------------------------------------|-----|------------------------------------------------------------------------------------------------------------------------------------------------------------------------------------------------------------------------------------------------------------------|--------------------------------------------|
|                                                           | 5d  | Composition, roles, and responsibilities of the coordinating centre, steering committee, endpoint adjudication committee, data management team, and other individuals or groups overseeing the trial, if applicable (see Item 21a for data monitoring committee) | Page 19, line 399-411                      |
| <b>Introduction</b>                                       |     |                                                                                                                                                                                                                                                                  |                                            |
| Background and rationale                                  | 6a  | Description of research question and justification for undertaking the trial, including summary of relevant studies (published and unpublished) examining benefits and harms for each intervention                                                               | Page 5 line 89-121                         |
|                                                           | 6b  | Explanation for choice of comparators                                                                                                                                                                                                                            | Page 6, line 111-121 & page 7 line 125-128 |
| Objectives                                                | 7   | Specific objectives or hypotheses                                                                                                                                                                                                                                | Page 7, Line 124-128                       |
| Trial design                                              | 8   | Description of trial design including type of trial (eg, parallel group, crossover, factorial, single group), allocation ratio, and framework (eg, superiority, equivalence, noninferiority, exploratory)                                                        | Page 7, line 130-132                       |
| <b>Methods: Participants, interventions, and outcomes</b> |     |                                                                                                                                                                                                                                                                  |                                            |
| Study setting                                             | 9   | Description of study settings (eg, community clinic, academic hospital) and list of countries where data will be collected. Reference to where list of study sites can be obtained                                                                               | Page 8, line 164-165                       |
| Eligibility criteria                                      | 10  | Inclusion and exclusion criteria for participants. If applicable, eligibility criteria for study centres and individuals who will perform the interventions (eg, surgeons, psychotherapists)                                                                     | Page 8-9, line 168-188                     |
| Interventions                                             | 11a | Interventions for each group with sufficient detail to allow replication, including how and when they will be administered                                                                                                                                       | Page 10-11, line 211-239                   |
|                                                           | 11b | Criteria for discontinuing or modifying allocated interventions for a given trial participant (eg, drug dose change in response to harms, participant request, or improving/worsening disease)                                                                   | Page 14, line 281-285                      |

|    |                      |     |                                                                                                                                                                                                                                                                                                                                                                                |                          |
|----|----------------------|-----|--------------------------------------------------------------------------------------------------------------------------------------------------------------------------------------------------------------------------------------------------------------------------------------------------------------------------------------------------------------------------------|--------------------------|
| 1  |                      | 11c | Strategies to improve adherence to intervention protocols, and any procedures for monitoring adherence (eg, drug tablet return, laboratory tests)                                                                                                                                                                                                                              | Page 15-16, line 329-335 |
| 2  |                      |     |                                                                                                                                                                                                                                                                                                                                                                                |                          |
| 3  |                      |     |                                                                                                                                                                                                                                                                                                                                                                                |                          |
| 4  |                      | 11d | Relevant concomitant care and interventions that are permitted or prohibited during the trial                                                                                                                                                                                                                                                                                  | Page 12, line 242-247    |
| 5  |                      |     |                                                                                                                                                                                                                                                                                                                                                                                |                          |
| 6  |                      |     |                                                                                                                                                                                                                                                                                                                                                                                |                          |
| 7  | Outcomes             | 12  | Primary, secondary, and other outcomes, including the specific measurement variable (eg, systolic blood pressure), analysis metric (eg, change from baseline, final value, time to event), method of aggregation (eg, median, proportion), and time point for each outcome. Explanation of the clinical relevance of chosen efficacy and harm outcomes is strongly recommended | Page 14-15, line 288-327 |
| 8  |                      |     |                                                                                                                                                                                                                                                                                                                                                                                |                          |
| 9  |                      |     |                                                                                                                                                                                                                                                                                                                                                                                |                          |
| 10 |                      |     |                                                                                                                                                                                                                                                                                                                                                                                |                          |
| 11 |                      |     |                                                                                                                                                                                                                                                                                                                                                                                |                          |
| 12 |                      |     |                                                                                                                                                                                                                                                                                                                                                                                |                          |
| 13 | Participant timeline | 13  | Time schedule of enrolment, interventions (including any run-ins and washouts), assessments, and visits for participants. A schematic diagram is highly recommended (see Figure)                                                                                                                                                                                               | Page 13, table 1         |
| 14 |                      |     |                                                                                                                                                                                                                                                                                                                                                                                |                          |
| 15 |                      |     |                                                                                                                                                                                                                                                                                                                                                                                |                          |
| 16 | Sample size          | 14  | Estimated number of participants needed to achieve study objectives and how it was determined, including clinical and statistical assumptions supporting any sample size calculations                                                                                                                                                                                          | Page 17, line 344-353    |
| 17 |                      |     |                                                                                                                                                                                                                                                                                                                                                                                |                          |
| 18 |                      |     |                                                                                                                                                                                                                                                                                                                                                                                |                          |
| 19 | Recruitment          | 15  | Strategies for achieving adequate participant enrolment to reach target sample size                                                                                                                                                                                                                                                                                            | Page 12, line 256        |
| 20 |                      |     |                                                                                                                                                                                                                                                                                                                                                                                |                          |
| 21 |                      |     |                                                                                                                                                                                                                                                                                                                                                                                |                          |

## 22 **Methods: Assignment of interventions (for controlled trials)**

### 23 Allocation:

|    |                                  |     |                                                                                                                                                                                                                                                                                                                                                          |                         |
|----|----------------------------------|-----|----------------------------------------------------------------------------------------------------------------------------------------------------------------------------------------------------------------------------------------------------------------------------------------------------------------------------------------------------------|-------------------------|
| 24 |                                  |     |                                                                                                                                                                                                                                                                                                                                                          |                         |
| 25 |                                  |     |                                                                                                                                                                                                                                                                                                                                                          |                         |
| 26 | Sequence generation              | 16a | Method of generating the allocation sequence (eg, computer-generated random numbers), and list of any factors for stratification. To reduce predictability of a random sequence, details of any planned restriction (eg, blocking) should be provided in a separate document that is unavailable to those who enrol participants or assign interventions | Page 9-10. Line 190-205 |
| 27 |                                  |     |                                                                                                                                                                                                                                                                                                                                                          |                         |
| 28 |                                  |     |                                                                                                                                                                                                                                                                                                                                                          |                         |
| 29 |                                  |     |                                                                                                                                                                                                                                                                                                                                                          |                         |
| 30 |                                  |     |                                                                                                                                                                                                                                                                                                                                                          |                         |
| 31 | Allocation concealment mechanism | 16b | Mechanism of implementing the allocation sequence (eg, central telephone; sequentially numbered, opaque, sealed envelopes), describing any steps to conceal the sequence until interventions are assigned                                                                                                                                                | Page 9-10. Line 190-205 |
| 32 |                                  |     |                                                                                                                                                                                                                                                                                                                                                          |                         |
| 33 |                                  |     |                                                                                                                                                                                                                                                                                                                                                          |                         |
| 34 |                                  |     |                                                                                                                                                                                                                                                                                                                                                          |                         |
| 35 |                                  |     |                                                                                                                                                                                                                                                                                                                                                          |                         |
| 36 | Implementation                   | 16c | Who will generate the allocation sequence, who will enrol participants, and who will assign participants to interventions                                                                                                                                                                                                                                | Page 9-10. Line 190-205 |
| 37 |                                  |     |                                                                                                                                                                                                                                                                                                                                                          |                         |
| 38 |                                  |     |                                                                                                                                                                                                                                                                                                                                                          |                         |
| 39 | Blinding (masking)               | 17a | Who will be blinded after assignment to interventions (eg, trial participants, care providers, outcome assessors, data analysts), and how                                                                                                                                                                                                                | Page 9-10. Line 190-210 |
| 40 |                                  |     |                                                                                                                                                                                                                                                                                                                                                          |                         |
| 41 |                                  |     |                                                                                                                                                                                                                                                                                                                                                          |                         |
| 42 |                                  |     |                                                                                                                                                                                                                                                                                                                                                          |                         |

1 17b If blinded, circumstances under which unblinding is permissible, and procedure for revealing a participant’s Page 10, line 207-  
 2 allocated intervention during the trial 208  
 3  
 4

5 **Methods: Data collection, management, and analysis**

6  
 7 Data collection 18a Plans for assessment and collection of outcome, baseline, and other trial data, including any related Page 14-15, line  
 8 methods processes to promote data quality (eg, duplicate measurements, training of assessors) and a description of 288-327  
 9 study instruments (eg, questionnaires, laboratory tests) along with their reliability and validity, if known.  
 10 Reference to where data collection forms can be found, if not in the protocol  
 11

12 18b Plans to promote participant retention and complete follow-up, including list of any outcome data to be Page 15-16, line  
 13 collected for participants who discontinue or deviate from intervention protocols 329-335  
 14

15 Data management 19 Plans for data entry, coding, security, and storage, including any related processes to promote data quality Page 17, Line 354-  
 16 (eg, double data entry; range checks for data values). Reference to where details of data management 361  
 17 procedures can be found, if not in the protocol  
 18  
 19

20 Statistical methods 20a Statistical methods for analysing primary and secondary outcomes. Reference to where other details of the Page 17-18, Line  
 21 statistical analysis plan can be found, if not in the protocol 362-367  
 22

23 20b Methods for any additional analyses (eg, subgroup and adjusted analyses) Page 17-18, Line  
 24 362-396  
 25

26 20c Definition of analysis population relating to protocol non-adherence (eg, as randomised analysis), and any Page 17, line 338-  
 27 statistical methods to handle missing data (eg, multiple imputation) 342  
 28  
 29  
 30

31 **Methods: Monitoring**

32  
 33 Data monitoring 21a Composition of data monitoring committee (DMC); summary of its role and reporting structure; statement of Page 19, line 398-  
 34 whether it is independent from the sponsor and competing interests; and reference to where further details 411  
 35 about its charter can be found, if not in the protocol. Alternatively, an explanation of why a DMC is not  
 36 needed  
 37  
 38

39 21b Description of any interim analyses and stopping guidelines, including who will have access to these interim Page 14, line 281-  
 40 results and make the final decision to terminate the trial 286  
 41  
 42

|    |                                 |     |                                                                                                                                                                                                                                                                                     |                                               |
|----|---------------------------------|-----|-------------------------------------------------------------------------------------------------------------------------------------------------------------------------------------------------------------------------------------------------------------------------------------|-----------------------------------------------|
| 1  | Harms                           | 22  | Plans for collecting, assessing, reporting, and managing solicited and spontaneously reported adverse events and other unintended effects of trial interventions or trial conduct                                                                                                   | Page 13-14, line 278-286                      |
| 2  |                                 |     |                                                                                                                                                                                                                                                                                     |                                               |
| 3  |                                 |     |                                                                                                                                                                                                                                                                                     |                                               |
| 4  | Auditing                        | 23  | Frequency and procedures for auditing trial conduct, if any, and whether the process will be independent from investigators and the sponsor                                                                                                                                         | Page 19, Line 398-411                         |
| 5  |                                 |     |                                                                                                                                                                                                                                                                                     |                                               |
| 6  |                                 |     |                                                                                                                                                                                                                                                                                     |                                               |
| 7  |                                 |     |                                                                                                                                                                                                                                                                                     |                                               |
| 8  | <b>Ethics and dissemination</b> |     |                                                                                                                                                                                                                                                                                     |                                               |
| 9  |                                 |     |                                                                                                                                                                                                                                                                                     |                                               |
| 10 | Research ethics approval        | 24  | Plans for seeking research ethics committee/institutional review board (REC/IRB) approval                                                                                                                                                                                           | Page 20, line 414                             |
| 11 |                                 |     |                                                                                                                                                                                                                                                                                     |                                               |
| 12 |                                 |     |                                                                                                                                                                                                                                                                                     |                                               |
| 13 | Protocol amendments             | 25  | Plans for communicating important protocol modifications (eg, changes to eligibility criteria, outcomes, analyses) to relevant parties (eg, investigators, REC/IRBs, trial participants, trial registries, journals, regulators)                                                    | Page 20, line 417-418                         |
| 14 |                                 |     |                                                                                                                                                                                                                                                                                     |                                               |
| 15 |                                 |     |                                                                                                                                                                                                                                                                                     |                                               |
| 16 |                                 |     |                                                                                                                                                                                                                                                                                     |                                               |
| 17 | Consent or assent               | 26a | Who will obtain informed consent or assent from potential trial participants or authorised surrogates, and how (see Item 32)                                                                                                                                                        | Page 20, line 436-437                         |
| 18 |                                 |     |                                                                                                                                                                                                                                                                                     |                                               |
| 19 |                                 |     |                                                                                                                                                                                                                                                                                     |                                               |
| 20 |                                 | 26b | Additional consent provisions for collection and use of participant data and biological specimens in ancillary studies, if applicable                                                                                                                                               | Not applicable                                |
| 21 |                                 |     |                                                                                                                                                                                                                                                                                     |                                               |
| 22 |                                 |     |                                                                                                                                                                                                                                                                                     |                                               |
| 23 |                                 |     |                                                                                                                                                                                                                                                                                     |                                               |
| 24 | Confidentiality                 | 27  | How personal information about potential and enrolled participants will be collected, shared, and maintained in order to protect confidentiality before, during, and after the trial                                                                                                | Page 17, line 354-361                         |
| 25 |                                 |     |                                                                                                                                                                                                                                                                                     |                                               |
| 26 |                                 |     |                                                                                                                                                                                                                                                                                     |                                               |
| 27 | Declaration of interests        | 28  | Financial and other competing interests for principal investigators for the overall trial and each study site                                                                                                                                                                       | Page 23, line 487-491                         |
| 28 |                                 |     |                                                                                                                                                                                                                                                                                     |                                               |
| 29 |                                 |     |                                                                                                                                                                                                                                                                                     |                                               |
| 30 | Access to data                  | 29  | Statement of who will have access to the final trial dataset, and disclosure of contractual agreements that limit such access for investigators                                                                                                                                     | Page 20, line 418-425                         |
| 31 |                                 |     |                                                                                                                                                                                                                                                                                     |                                               |
| 32 |                                 |     |                                                                                                                                                                                                                                                                                     |                                               |
| 33 | Ancillary and post-trial care   | 30  | Provisions, if any, for ancillary and post-trial care, and for compensation to those who suffer harm from trial participation                                                                                                                                                       | Page 20, line 437-438                         |
| 34 |                                 |     |                                                                                                                                                                                                                                                                                     |                                               |
| 35 |                                 |     |                                                                                                                                                                                                                                                                                     |                                               |
| 36 | Dissemination policy            | 31a | Plans for investigators and sponsor to communicate trial results to participants, healthcare professionals, the public, and other relevant groups (eg, via publication, reporting in results databases, or other data sharing arrangements), including any publication restrictions | Page 8 line 154-156 and Page 20, line 427-431 |
| 37 |                                 |     |                                                                                                                                                                                                                                                                                     |                                               |
| 38 |                                 |     |                                                                                                                                                                                                                                                                                     |                                               |
| 39 |                                 |     |                                                                                                                                                                                                                                                                                     |                                               |
| 40 |                                 |     |                                                                                                                                                                                                                                                                                     |                                               |
| 41 |                                 |     |                                                                                                                                                                                                                                                                                     |                                               |
| 42 |                                 |     |                                                                                                                                                                                                                                                                                     |                                               |
| 43 |                                 |     |                                                                                                                                                                                                                                                                                     |                                               |
| 44 |                                 |     |                                                                                                                                                                                                                                                                                     |                                               |
| 45 |                                 |     |                                                                                                                                                                                                                                                                                     |                                               |
| 46 |                                 |     |                                                                                                                                                                                                                                                                                     |                                               |



1  
2  
3  
4  
5  
6  
7  
8  
9  
10  
11  
12  
13  
14  
15  
16  
17  
18  
19  
20  
21  
22  
23  
24  
25  
26  
27  
28  
29  
30  
31  
32  
33  
34  
35  
36  
37  
38  
39  
40  
41  
42  
43  
44  
45  
46

31b Authorship eligibility guidelines and any intended use of professional writers Page 22, line 467-484

31c Plans, if any, for granting public access to the full protocol, participant-level dataset, and statistical code Page 20, line 418-425

**Appendices**

Informed consent materials 32 Model consent form and other related documentation given to participants and authorised surrogates Appendix A

Biological specimens 33 Plans for collection, laboratory evaluation, and storage of biological specimens for genetic or molecular analysis in the current trial and for future use in ancillary studies, if applicable Not applicable

---

\*It is strongly recommended that this checklist be read in conjunction with the SPIRIT 2013 Explanation & Elaboration for important clarification on the items. Amendments to the protocol should be tracked and dated. The SPIRIT checklist is copyrighted by the SPIRIT Group under the Creative Commons [“Attribution-NonCommercial-NoDerivs 3.0 Unported”](#) license.

For peer review only
