# Supplementary material for: Platelet-Rich plasma Injection Management for Ankle osteoarthritis study (PRIMA): protocol of a Dutch multicentre, stratified, block-randomised, double-blind, placebo-controlled trial
Source: PubMed Central journal article supplement (PMC6797250; doi:10.1136/bmjopen-2019-030961), 2019-10-07
Supplement: bmjopen-2019-030961.reviewer_comments.pdf [file bmjopen-2019-030961.reviewer_comments.pdf]

## PEER REVIEW HISTORY

BMJ Open publishes all reviews undertaken for accepted manuscripts. Reviewers are asked to complete a checklist review form (<http://bmjopen.bmj.com/site/about/resources/checklist.pdf>) and are provided with free text boxes to elaborate on their assessment. These free text comments are reproduced below.

### ARTICLE DETAILS

|                            |                                                                                                                                                                                                                 |
|----------------------------|-----------------------------------------------------------------------------------------------------------------------------------------------------------------------------------------------------------------|
| <b>TITLE (PROVISIONAL)</b> | Platelet Rich plasma Injection Management for Ankle osteoarthritis study (PRIMA) Protocol of a Dutch multi-center, stratified, block-randomized, double-blind, placebo-controlled trial                         |
| <b>AUTHORS</b>             | Paget, Liam David Andrew; Bierma-Zeinstra, Sita M.A.; Goedegebuure, S; Kerkhoffs, Gino M.M.J.; Krips, R; Maas, Mario; Moen, Maarten H; Reurink, G; Stufkens, Sjoerd A.S.: de Vos, Robert-Jan; Weir, A; Tol, J L |

### VERSION 1 – REVIEW

|                        |                                                                                                          |
|------------------------|----------------------------------------------------------------------------------------------------------|
| <b>REVIEWER</b>        | Jun Liu<br>The Second Affiliated Hospital of Guangzhou University of Chinese Medicine, Guangzhou, China. |
| <b>REVIEW RETURNED</b> | 11-Jun-2019                                                                                              |

|                         |                                                                                                                                                                                                                                       |
|-------------------------|---------------------------------------------------------------------------------------------------------------------------------------------------------------------------------------------------------------------------------------|
| <b>GENERAL COMMENTS</b> | The protocol is well designed. This paper has a potential to be accepted. Can you discuss the mechanisms for PRP injections in the treatment of ankle OA? In addition, is there a statistical expert involved in your clinical trial? |
|-------------------------|---------------------------------------------------------------------------------------------------------------------------------------------------------------------------------------------------------------------------------------|

### VERSION 1 – AUTHOR RESPONSE

Reviewer: The protocol is well designed. This paper has a potential to be accepted.

Response to reviewer: We thank the reviewer for his/her kind words.

Action taken: None required

Reviewer: Can you discuss the mechanisms for PRP injections in the treatment of ankle OA?

Response to reviewer: We thank the reviewer for this point and have added a paragraph discussing the mechanisms of PRP.

Action taken: page 5 line 100-109:

“Platelet Rich Plasma (PRP) is defined as plasma containing a concentration of at least 1,000,000 platelets/ $\mu$ l.<sup>4</sup> Growth factors are stored in  $\alpha$ -granules within platelets, and are released in a selective manner upon activation. Growth factors released from the  $\alpha$ -granules of platelets are assumed to provide the regenerative benefits of PRP.

Recent reviews concluded that in animal models PRP can diminish multiple inflammatory IL-1 mediated effects.<sup>5</sup> Due to this local anti-inflammatory response, PRP might have an indirect analgesic effect. The second suggested effect might be protection of the cartilage from destructive pro-inflammatory interleukines. This is mediated due to an increased mRNA expression of proteoglycan core protein in the articular cartilage and decreased chondrocyte apoptosis.<sup>5</sup> Consequently, PRP could positively influence the collagen network of the cartilage.”

Reviewer: In addition, is there a statistical expert involved in your clinical trial?

Response to reviewer: We do indeed have a statistical expert and have added this to the protocol accordingly.

Action taken: page 18, line 364: "A statistical expert (SB) is present among the authors."
